# Supplementary material for: Integrated multi-omics analysis for lung adenocarcinoma in Xuanwei, China
Source: Aging (Albany NY). 2023 Dec 13;15(23):14263–91. doi: 10.18632/aging.205300 (PMC10756121; doi:10.18632/aging.205300)
Supplement: Supplementary File 2 [file aging-15-205300-s008.xlsx]

## Sheet: LUAD specific lncRNAs
Supplementary File 2. The lung adenocarcinoma specific lncRNAs and the pan-cancer specific lncRNAs.
lncRNA	disease
PRKCZ-AS1	lung adenocarcinoma
LINC01833	lung adenocarcinoma
LINC01511	lung adenocarcinoma
LINC01512	lung adenocarcinoma
LUADT1	lung adenocarcinoma
CCAT1	lung adenocarcinoma
DRAIC	lung adenocarcinoma
HNF4A-AS1	lung adenocarcinoma
ACTA2-AS1	lung adenocarcinoma
ENST00000434223	lung adenocarcinoma
ENST00000442037	lung adenocarcinoma
ENST00000540136	lung adenocarcinoma
GAS5	lung adenocarcinoma
GAS5	lung adenocarcinoma
HNF1A-AS1	lung adenocarcinoma
HOTAIR	lung adenocarcinoma
HOTAIR	lung adenocarcinoma
HOTAIR	lung adenocarcinoma
HOTAIR	lung adenocarcinoma
LINC00115	lung adenocarcinoma
LINC01207	lung adenocarcinoma
MAFA-AS1	lung adenocarcinoma
MEG3	lung adenocarcinoma
MEG3	lung adenocarcinoma
MIAT	lung adenocarcinoma
PCAT29	lung adenocarcinoma
RGMB-AS1	lung adenocarcinoma
ZNF295-AS1	lung adenocarcinoma
LINC00511	lung adenocarcinoma
MALAT1	lung adenocarcinoma
MALAT1	lung adenocarcinoma
MALAT1	lung adenocarcinoma
SOX21-AS1	lung adenocarcinoma
AFAP1-AS1	lung adenocarcinoma
DLX6-AS1	lung adenocarcinoma
AC079776.2	lung adenocarcinoma
CTA-363E6.2	lung adenocarcinoma
FAR2P1	lung adenocarcinoma
LCAL6	lung adenocarcinoma
LINC00987	lung adenocarcinoma
LOC440905	lung adenocarcinoma
NR_038125	lung adenocarcinoma
PDLIM3	lung adenocarcinoma
RP11-1C1.7	lung adenocarcinoma
RP11-445K13.2	lung adenocarcinoma
RP11-457M11.2	lung adenocarcinoma
RP11-473M20.11	lung adenocarcinoma
RP11-893F2.6	lung adenocarcinoma
RP11-89K21	lung adenocarcinoma
RP13-514E23.1	lung adenocarcinoma
RP1-90D4.3	lung adenocarcinoma
RP4-575N6.5	lung adenocarcinoma
RP5-826L7.1	lung adenocarcinoma
RPLP0P2	lung adenocarcinoma
RPLP0P2	lung adenocarcinoma
uc001gch.1	lung adenocarcinoma
uc001gzl.3	lung adenocarcinoma
uc004bbl.1	lung adenocarcinoma
VNN2	lung adenocarcinoma
XLOC_003286	lung adenocarcinoma
XLOC_003405	lung adenocarcinoma
XLOC_012255	lung adenocarcinoma
ZXF2	lung adenocarcinoma

## Sheet: Pan-cancer lncRNA markers
lncRNA	disease
PRKCZ-AS1	lung adenocarcinoma
NPPA-AS1	cardiovascular disease
NPPA-AS1	cardiovascular disease
LINC01772	oesophageal cancer
LINC00339	pancreatic ductal adenocarcinoma
LINC02574	UVB-irradiated KC & non-melanoma skin cancer
SNHG3	colorectal cancer
SNHG3	hepatocellular cancer
SNHG3	ovarian cancer
SNHG3	alzheimer's disease
FOXD2-AS1	lung cancer
NFIA-AS1	glioma
NFIA-AS1	atherosclerosis
LINC02238	B cell lymphoma
DPYD-AS2	cervical squamousscancer
LINC01930	schizophrenia
SLC16A1-AS1	acute myocardial infarction
LINC01525	squamous cell cancer
LINC01138	prostate cancer
DCST1-AS1	ovarian cancer
LINC01133	non-small cell lung cancer
LINC01133	lung squamous cell cancer
LINC01133	colorectal cancer
GAS5-AS1	oral submucous fibrosis
GAS5-AS1	non-small cell lung cancer
OVAAL	ovarian cancer
KIAA1614-AS1	airway smooth muscle (ASM) disease
LAMC1-AS1	colorectal cancer
LINC00862	cystic fibrosis
LINC00628	gastric cancer
LINC00538	colorectal cancer
LINC00538	cancer
TGFB2-AS1	early-onset preeclampsia
DISC2	schizophrenia
DISC2	schizophrenia
DISC2	schizophrenia
DISC2	schizophrenia
DISC2	schizophrenia
DISC2	schizophrenia
DISC2	major depressive affective disorder
DISC2	depression
DISC2	bipolar disorder
DISC2	bipolar disorder
DISC2	autism spectrum disorder
DISC2	autism spectrum disorder
DISC2	affective disorder
RNASEH1-AS1	colorectal cancer
NRIR	HCV
NRIR	chronic hepatitis C
LINC00299	neurodevelopmental disabilities
LINC00299	intellectual and developmental disability
MYCNUT	neuroblastoma
MYCNOS	neuroblastoma
MYCNOS	neuroblastoma
MYCNOS	neuroblastoma
LINC02580	UVB-irradiated KC & non-melanoma skin cancer
LINC01833	lung adenocarcinoma
LINC02576	UVB-irradiated KC & non-melanoma skin cancer
LBX2-AS1	renal cell cancer
GACAT1	gastric cancer
DARS-AS1	renal disease
HAGLR	neuroblastoma
HAGLR	bladder cancer
MYOSLID	vascular smooth muscle cell (VSMC) contractile phenotype
CPS1-IT1	lung cancer
CPS1-IT1	intrahepatic cholangiocarcinoma
CPS1-IT1	hepatocellular cancer
DIRC3	familial renal cell cancer
DIRC3	breast cancer
RASSF1-AS1	breast cancer
FAM3D-AS1	tongue cancer
FAM3D-AS1	pharyngeal cancer
FAM3D-AS1	laryngeal cancer
FAM3D-AS1	head and neck squamous cell cancer
PSMD6-AS1	papillary thyroid cancer
PSMD6-AS1	glioma
ADAMTS9-AS2	non-small cell lung cancer
ADAMTS9-AS2	glioma
LINC02027	hepatocellular cancer
LINC00882	airway diseases
TUSC7	pancreatic ductal adenocarcinoma
TUSC7	osteosarcoma
TUSC7	osteosarcoma
TUSC7	osteosarcoma
TUSC7	non-small cell lung cancer
TUSC7	ischemic heart failure
TUSC7	hepatocellular cancer
TUSC7	glioma
TUSC7	gastric cancer
TUSC7	esophageal squamous cell cancer
TUSC7	colorectal cancer
TUSC7	colorectal cancer
TUSC7	colorectal cancer
TUSC7	colorectal cancer
TUSC7	colorectal cancer
TUSC7	acute myeloid leukemia
LINC00901	osteosarcoma
LINC00901	gastric cancer
LINC00901	breast cancer
NCK1-DT	cervical cancer
PISRT1	blepharophimosis syndrome
PISRT1	blepharophimosis syndrome
KCNMB2-AS1	non-small cell lung cancer
MELTF-AS1	osteosarcoma
LINC02562	cystic fibrosis
PCAT4	prostate cancer
PANCR	atrial fibrillation
LINC02264	gastric cancer
SLC7A11-AS1	early-onset preeclampsia
LINC01511	lung adenocarcinoma
LINC01018	hepatocellular cancer
LINC01194	melanoma
EGFLAM-AS1	gastric cancer
LIFR-AS1	preterm
FGF10-AS1	ventricular septal defects
MRPS30-DT	breast cancer
PART1	prostate cancer
PART1	glioblastoma
RASGRF2-AS1	sepsis-induced endothelial dysfunction
LINC00461	retinal and visualsfunction
MEF2C-AS1	prader-willi syndrome and angelman syndrome
MEF2C-AS1	gastric cancer
LUCAT1	non-small cell lung cancer
LUCAT1	lung cancer
ENST00000503710	endometrial cancer
LINC02201	gastric cancer
SNHG4	myelodysplastic syndrome
SPRY4-AS1	bladder cancer
CLMAT3	colorectal cancer
CLMAT3	colorectal cancer
LINC01411	prostate cancer
HEIH	hepatocellular cancer
HEIH	hepatocelluar cancer
HEIH	hepatocelluar cancer
LINC00240	esophagealssquamousscellscancer
LINC01016	breast cancer
LINC01016	breast cancer
PANDAR	renal cell cancer
PANDAR	p53-associated pathological states
PANDAR	non-small cell lung cancer
PANDAR	hepatocellular cancer
PANDAR	gastric cancer
PANDAR	colorectal cancer
PANDAR	cancer
PANDAR	breast cancer
PANDAR	bladder cancer
FOXP4-AS1	colorectal cancer
LINC01512	type 2 diabetes
LINC01512	lung adenocarcinoma
LINC01526	squamous cell cancer
FILNC1	renal tumor
NMBR-AS1	non-melanoma skin cancer
LUADT1	lung adenocarcinoma
RPS6KA2-AS1	breast cancer
HOTAIRM1	promyelocytic leukemia
HOTAIRM1	pancreatic ductal adenocarcinoma
HOTAIRM1	leukemia
HOTAIRM1	infiltrating ductal cancers
HOTAIRM1	glioma
HOTAIRM1	colorectal cancer
HOTAIRM1	acute promyelocytic leukemia
HOTAIRM1	acute myeloid leukemia
HOTAIRM1	acute myeloid leukemia
HOXA-AS2	promyelocytic leukemia
HOXA-AS2	gastric cancer
HOTTIP	tongue squamous cell cancer
HOTTIP	prostate cancer
HOTTIP	prostate cancer
HOTTIP	pancreatic ductal adenocarcinoma
HOTTIP	pancreatic cancer
HOTTIP	pancreatic cancer
HOTTIP	pancreatic cancer
HOTTIP	pancreatic cancer
HOTTIP	osteosarcoma
HOTTIP	osteosarcoma
HOTTIP	non-small cell lung cancer
HOTTIP	lung cancer
HOTTIP	lung cancer
HOTTIP	hirschsprung disease
HOTTIP	hepatocellular cancer
HOTTIP	hepatocellular cancer
HOTTIP	hepatocellular cancer
HOTTIP	hepatocellular cancer
HOTTIP	hepatocelluar cancer
HOTTIP	hepatocelluar cancer
HOTTIP	glioma
HOTTIP	gastric cancer
HOTTIP	gastric cancer
HOTTIP	gastric cancer
HOTTIP	gastric cancer
HOTTIP	colorectal cancer
HOTTIP	colorectal cancer
HOTTIP	colorectal cancer
LINC02577	UVB-irradiated KC & non-melanoma skin cancer
ST7-AS1	glioma
ST7-AS1	autism
ST7-AS2	autism
ST7-OT3	autism
CFTR-AS1	cystic fibrosis
FLNC-AS1	cervical squamous cancer
LINC-PINT	heart failure
LINC-PINT	colorectal cancer
LINC02153	major depression disorder
INTS9-AS1	early-onset preeclampsia
LINC02099	rheumatoid arthritis
LINC02099	breast cancer
CERNA3	osteosarcoma
LINC02155	esophageal cancer
MIR2052HG	breast cancer
CASC9	esophageal squamous cell cancer
CASC9	esophageal squamous cell cancer
CASC9	esophageal squamous cell cancer
CASC9	esophageal cancer
LINC00536	trichorhinophalangeal syndrome
SMILR	vascular pathologies
LINC00964	colorectal cancer
CCAT1	ovarian cancer
CCAT1	non-small cell lung cancer
CCAT1	lung cancer
CCAT1	lung adenocarcinoma
CCAT1	hepatocellular cancer
CCAT1	hepatocellular cancer
CCAT1	hepatocellular cancer
CCAT1	hepatocellular cancer
CCAT1	hepatocelluar cancer
CCAT1	glioma
CCAT1	gastric cancer
CCAT1	gastric cancer
CCAT1	gastric cancer
CCAT1	gastric cancer
CCAT1	gastric cancer
CCAT1	gastric cancer
CCAT1	gastric cancer
CCAT1	gallbladder cancer
CCAT1	endometrial cancer
CCAT1	colorectal cancer
CCAT1	colorectal cancer
CCAT1	colorectal cancer
CCAT1	colorectal cancer
CCAT1	colorectal cancer
CCAT1	colorectal cancer
CCAT1	colorectal cancer
CCAT1	colorectal cancer
CCAT1	breast cancer
CCAT1	acute myeloid leukemia
CCAT2	small cell lung cancer
CCAT2	prostate cancer
CCAT2	ovarian cancer
CCAT2	oral squamous cell cancer
CCAT2	non-small cell lung cancer
CCAT2	lung cancer
CCAT2	hepatocellular cancer
CCAT2	gastric cancer
CCAT2	esophageal squamous cell cancer
CCAT2	esophageal squamous cell cancer
CCAT2	colorectal cancer
CCAT2	colorectal cancer
CCAT2	cervical squamous cell cancer
CCAT2	cervical cancer
CCAT2	breast cancer
CCAT2	breast cancer
CCAT2	bladder cancer
CASC8	lung cancer
CASC11	hepatocellular cancer
CASC11	colorectal cancer
ASAP1-IT1	ovarian cancer
ZFAT-AS1	autoimmune disease
LINC02055	hepatocellular cancer
GLIDR	glioblastoma
ENST00000414223	renal cell cancer
PGM5-AS1	bladder cancer
PGM5-AS1	bladder cancer
LINC01507	colorectal cancer
LINC02578	UVB-irradiated KC & non-melanoma skin cancer
LINC00963	renal cell cancer
LINC00963	prostate cancer
NALT1	acute lymphoblastic leukemia
VIM-AS1	endometrial cancer
LINC01264	breast cancer
LINC01468	squamous cell cancer
LINC00857	lung cancer
OLMALINC	type 2 diabetes
MIR210HG	hypoxic and inflammatory stress
LINC01150	wilms' tumor
SNHG1	Parkinson's disease
SNHG1	non-small cell lung cancer
SNHG1	neuroblastoma
SNHG1	hepatocellular cancer
SNHG1	astrocytoma
RPS6KB2-AS1	aging‑associated idiopathic pulmonary fibrosis
DISC1FP1	schizophrenia
LINC02151	major depression disorder
LINC02098	esophageal cancer
SENCR	vascular SMC phenotype
LINC02555	papillary thyroid cancer
PCBP2-OT1	tongue squamous cell cancer
PCBP2-OT1	hepatocellular cancer
CISTR	brachydactyly
HOXC-AS1	atherosclerosis
LRP1-AS	alzheimer's disease
IFNG-AS1	sjögren syndrome
IFNG-AS1	primary immune thrombocytopenia
IFNG-AS1	multiple sclerosis
IFNG-AS1	hashimoto's thyroiditis
LINC02258	pneumonia
RMST	rhabdomyosarcoma
RMST	breast cancer
LINC01234	oesophageal squamous cell cancer
LINC01234	breast cancer
LINC01089	breast cancer
LINC01089	astrocytoma
THRIL	Kawasaki disease
TMEM132D-AS1	human dermal fibroblasts
PSPC1-AS2	esophageal cancer
LINC00426	primary Sjögren's syndrome
TUSC8	cervical cancer
LINC00462	hepatocellular cancer
ATXN8OS	spinocerebellar ataxia
ATXN8OS	spinocerebellar ataxia
ATXN8OS	spinocerebellar ataxia
ATXN8OS	spinocerebellar ataxia
ATXN8OS	spinocerebellar ataxia
ATXN8OS	spinocerebellar ataxia
ATXN8OS	spinocerebellar ataxia
ATXN8OS	spinocerebellar ataxia
ATXN8OS	spinocerebellar ataxia
ATXN8OS	spinocerebellar ataxia
FGF14-AS2	breast cancer
DAOA-AS1	schizophrenia
DAOA-AS1	schizophrenia
DAOA-AS1	schizophrenia
DAOA-AS1	schizophrenia
DAOA-AS1	schizophrenia
DAOA-AS1	schizophrenia
DAOA-AS1	schizophrenia
DAOA-AS1	schizophrenia
DAOA-AS1	schizophrenia
DAOA-AS1	panic disorder
DAOA-AS1	bipolar disorder
GAS6-AS1	non-small cell lung cancer
FOXG1-AS1	autism spectrum disorder
G2E3-AS1	bladder cancer
KTN1-AS1	colorectal cancer
LINC00520	breast cancer
MKRN3-AS1	Prader-Willi syndrome
PWRN2	Prader-Willi syndrome
PWAR5	prader-willi syndrome and angelman syndrome
PWAR5	Prader-Willi syndrome
PWAR5	glioblastoma
IPW	Prader-Willi syndrome
IPW	Prader-Willi syndrome
IPW	Prader-Willi syndrome
IPW	Prader-Willi syndrome
PWAR4	prader-willi syndrome and angelman syndrome
SNHG14	Prader-Willi syndrome
SNHG14	cerebral infarction
SNHG14	angelman syndrome
SNHG14	angelman syndrome
SNHG14	angelman syndrome
SNHG14	angelman syndrome
SNHG14	angelman syndrome
LINC01852	non-small cell lung cancer
SPINT1-AS1	melanoma
MIR4713HG	colorectal cancer
DRAIC	stomach adenocarcinoma
DRAIC	skin melanoma
DRAIC	renal clear cell cancer
DRAIC	prostate cancer
DRAIC	lung adenocarcinoma
DRAIC	hepatocellular cancer
DRAIC	glioma
DRAIC	cancer
DRAIC	bladder cancer
NPTN-IT1	squamous cell lung cancer
NPTN-IT1	nasopharyngeal cancer
NPTN-IT1	lung squamous cell cancer
NPTN-IT1	hypoxia
NPTN-IT1	hepatocelluar cancer
NPTN-IT1	hepatocelluar cancer
NPTN-IT1	hepatocelluar cancer
NPTN-IT1	gastric cancer
NPTN-IT1	gallbladder cancer
NPTN-IT1	esophageal squamous cell cancer
NPTN-IT1	colorectal cancer
NPTN-IT1	cervical cancer
LINC02157	esophageal cancer
LINC00235	anorexia nervosa
LINC02152	major depression disorder
IL21R-AS1	coronary artery disease
CASC22	breast cancer
MMP2-AS1	early-onset preeclampsia
HCCAT5	hepatocellular cancer
WWOX-AS1	epithelial ovarian cancer
LINC01081	alveolar capillary dysplasia
LINC00917	intervertebral disc degeneration
LINC00917	breast cancer
MIR22HG	ovarian cancer
SMCR2	Smith-Magenis syndrome
CCDC144NL-AS1	ovarian cancer
CCDC144NL-AS1	cardiac hypertrophy
SKAP1-AS1	pneumonia
ENST00000575202	colorectal cancer
CACNA1G-AS1	keloid
WFDC21P	DC dysfunction
SNHG16	neuroblastoma
SNHG16	neuroblastoma
SNHG16	colorectal cancer
SNHG16	colorectal cancer
SNHG16	bladderscancer
SNHG16	bladder cancer
SNHG20	hepatocellular cancer
SNHG20	hepatocellular cancer
SNHG20	colorectal cancer
NARF-AS1	hepatocellular cancer
LINC00470	age-related macular degeneration
GAPLINC	gastric cancer
GAPLINC	gastric cancer
GAPLINC	gastric cancer
GAPLINC	colorectal cancer
LINC00667	hereditary haemorrhagic telangiectasia
LINC00668	gastric cancer
GATA6-AS1	gastric cancer
GATA6-AS1	chronic lymphocytic leukemia
LINC01929	papillary thyroid cancer
LIVAR	nonalcoholic steatohepatiti
LINC02582	colorectal cancer
MIR7-3HG	liver cancer
MIR7-3HG	hepatocelluar cancer
UCA1	urinary bladder
UCA1	tongue squamous cell cancer
UCA1	tongue squamous cell cancer
UCA1	squamous cell cancer
UCA1	renal cell cancer
UCA1	prostate cancer
UCA1	prostate cancer
UCA1	pancreaticobiliary maljunction
UCA1	pancreatic ductal adenocarcinoma
UCA1	pancreatic cancer
UCA1	ovarian cancer
UCA1	ovarian cancer
UCA1	ovarian cancer
UCA1	ovarian cancer
UCA1	ovarian cancer
UCA1	ovarian cancer
UCA1	osteosarcoma
UCA1	oral squamous cell cancer
UCA1	oral squamous cell cancer
UCA1	oral squamous cell cancer
UCA1	non-small cell lung cancer
UCA1	non-small cell lung cancer
UCA1	melanoma
UCA1	melanoma
UCA1	lung cancer
UCA1	liver cancer
UCA1	liver cancer
UCA1	liver cancer
UCA1	hepatocellular cancer
UCA1	hepatocellular cancer
UCA1	hepatocellular cancer
UCA1	hepatocellular cancer
UCA1	hepatocelluar cancer
UCA1	gastric cancer
UCA1	gastric cancer
UCA1	gastric cancer
UCA1	gastric cancer
UCA1	gastric cancer
UCA1	gastric cancer
UCA1	gastric cancer
UCA1	gastric cancer
UCA1	esophageal squamous cell cancer
UCA1	esophageal squamous cell cancer
UCA1	esophageal cancer
UCA1	endometrial cancer
UCA1	colorectal cancer
UCA1	colorectal cancer
UCA1	colorectal cancer
UCA1	colorectal cancer
UCA1	breast cancer
UCA1	breast cancer
UCA1	breast cancer
UCA1	breast cancer
UCA1	breast cancer
UCA1	breast cancer
UCA1	breast cancer
UCA1	bladder cancer
UCA1	bladder cancer
UCA1	bladder cancer
UCA1	bladder cancer
UCA1	bladder cancer
UCA1	bladder cancer
UCA1	bladder cancer
UCA1	bladder cancer
UCA1	bladder cancer
UCA1	bladder cancer
UCA1	bladder cancer
UCA1	bladder cancer
UCA1	bladder cancer
UCA1	bladder cancer
UCA1	bladder cancer
UCA1	bladder cancer
UCA1	bladder cancer
UCA1	bladder cancer
UCA1	bladder cancer
UCA1	bladder cancer
UCA1	bladder cancer
UCA1	acute myocardial infarction
UCA1	acute myeloid leukemia
ZNF582-AS1	colorectal cancer
LINC02560	cystic fibrosis
PCNA-AS1	hepatocelluar cancer
PCNA-AS1	gastric cancer
LINC00237	obesity
LINC00237	macrocephaly
MIR663AHG	turner syndrome
ABALON	renal cell cancer
DLGAP4-AS1	colorectal cancer
SNHG11	obesity
LINC01370	type 2 diabetes
HNF4A-AS1	lung adenocarcinoma
SLC12A5-AS1	early-onset preeclampsia
GNAS-AS1	pseudohypoparathyroidism type Ib
GNAS-AS1	non-small cell lung cancer
LINC02573	gastric cancer
LINC00320	cortical white matter
LINC00161	osteosarcoma
LINC01436	down syndrome
CBR3-AS1	prostate cancer
CBR3-AS1	prostate cancer
CBR3-AS1	prostate cancer
CBR3-AS1	prostate cancer
CBR3-AS1	hepatocellular cancer
CBR3-AS1	esophageal squamous cell cancer
UMODL1-AS1	breast cancer
PICSAR	testicular embryonal cancer
PICSAR	narcolepsy
PICSAR	cutaneous squamous cell cancer
PICSAR	cutaneous squamous cell cancer
CECR3	cat eye syndrome
DGCR9	diGeorge syndrome
PCAT14	prostate cancer
PCAT14	prostate cancer
PCAT14	prostate cancer
LINC01315	nasopharyngeal cancer
LINC01315	nasopharyngeal cancer
PINCR	colorectal cancer
LINC01186	lungscancer
ZNF674-AS1	hepatocellular cancer
ZNF674-AS1	hepatocellular cancer
DIAPH2-AS1	hodgkin's disease
LINC00629	choriocarcinoma
LINC00632	gastric cancer
FMR1-AS1	neurological disorder
FMR1-AS1	fragile X syndrome
FMR1-AS1	fragile X syndrome
FMR1-AS1	fragile X syndrome
FMR1-AS1	fragile X syndrome
TTTY10	colorectal cancer
ABHD11-AS1	mutant huntingtin
ABHD11-AS1	gastric cancer
ABHD11-AS1	gastric cancer
ACBD3-AS1	endometrial cancer
ACTA2-AS1	lung adenocarcinoma
ADAMTS9-AS1	epithelialsovarianscancer
BAALC-AS1	liver cancer
BACE1-AS	ovarian cancer
BACE1-AS	colorectal cancer
BACE1-AS	alzheimer's disease
BACE1-AS	alzheimer's disease
BACE1-AS	alzheimer's disease
BACE1-AS	alzheimer's disease
BACE1-AS	alzheimer's disease
BACE1-AS	alzheimer's disease
BACE1-AS	alzheimer's disease
BACE1-AS	alzheimer's disease
BACE1-AS	alzheimer's disease
BACE1-AS	alzheimer's disease
BACE1-AS	alzheimer's disease
BACE1-AS	alzheimer's disease
BCAR4	osteosarcoma
BCAR4	colorectal cancer
BCAR4	breast cancer
BCAR4	breast cancer
BCAR4	breast cancer
BCAR4	breast cancer
BCAR4	breast cancer
BCAR4	breast cancer
BDNF-AS	schizophrenia
BDNF-AS	psychiatric disease
BDNF-AS	obesity
BDNF-AS	obesity
BDNF-AS	huntington disease
BDNF-AS	huntington disease
BDNF-AS	huntington disease
BGLT3	chronic myeloid leukemia
BISPR	virus infection
BNC2-AS1	gastric cancer
BOK-AS1	testicular cancer
BOK-AS1	esophageal squamous cell cancer
BOK-AS1	cancer
CAHM	colorectal cancer
CAMTA1-DT	liver cancer
CARD8-AS1	leukemia and neuroblastoma
CARMN	cardiac differentiation
CASC15	neuroblastoma
CASC15	melanoma
CASC15	basal cell cancer
CASC2	renal cell cancer
CASC2	lung cancer
CASC2	glioma
CASC2	gastric cancer
CASC2	endometrial cancer
CASC2	colorectal cancer
CCDC18-AS1	adolescent idiopathic scoliosis
CCND2-AS1	glioma
CDKN2B-AS1	type 2 diabetes
CDKN2B-AS1	type 2 diabetes
CDKN2B-AS1	type 2 diabetes
CDKN2B-AS1	type 2 diabetes
CDKN2B-AS1	type 2 diabetes
CDKN2B-AS1	type 2 diabetes
CDKN2B-AS1	thyroid cancer
CDKN2B-AS1	stroke
CDKN2B-AS1	stroke
CDKN2B-AS1	stroke
CDKN2B-AS1	stroke
CDKN2B-AS1	stroke
CDKN2B-AS1	stroke
CDKN2B-AS1	stroke
CDKN2B-AS1	prostate cancer
CDKN2B-AS1	prostate cancer
CDKN2B-AS1	prostate cancer
CDKN2B-AS1	prostate cancer
CDKN2B-AS1	prostate cancer
CDKN2B-AS1	prostate cancer
CDKN2B-AS1	prostate cancer
CDKN2B-AS1	prostate cancer
CDKN2B-AS1	primary open-angle glaucoma
CDKN2B-AS1	primary myelofibrosis
CDKN2B-AS1	plexiform neurofibroma
CDKN2B-AS1	plexiform neurofibroma
CDKN2B-AS1	peripheral artery disease
CDKN2B-AS1	periodontitis
CDKN2B-AS1	periodontitis
CDKN2B-AS1	ovarian cancer
CDKN2B-AS1	ovarian cancer
CDKN2B-AS1	osteosarcoma
CDKN2B-AS1	osteosarcoma
CDKN2B-AS1	non-small cell lung cancer
CDKN2B-AS1	non-small cell lung cancer
CDKN2B-AS1	non-small cell lung cancer
CDKN2B-AS1	non-small cell lung cancer
CDKN2B-AS1	neurofibromatosis
CDKN2B-AS1	neurofibromatosis
CDKN2B-AS1	neurofibromatosis
CDKN2B-AS1	neuroblastoma
CDKN2B-AS1	nasopharyngeal cancer
CDKN2B-AS1	nasopharyngeal cancer
CDKN2B-AS1	nasopharyngeal cancer
CDKN2B-AS1	nasopharyngeal cancer
CDKN2B-AS1	myocardial infarction
CDKN2B-AS1	myocardial infarction
CDKN2B-AS1	myocardial infarction
CDKN2B-AS1	melanoma
CDKN2B-AS1	melanoma
CDKN2B-AS1	melanoma
CDKN2B-AS1	melanoma
CDKN2B-AS1	melanoma
CDKN2B-AS1	melanoma
CDKN2B-AS1	lung cancer
CDKN2B-AS1	lung cancer
CDKN2B-AS1	lung cancer
CDKN2B-AS1	leukemia
CDKN2B-AS1	laryngeal squamous cell cancer
CDKN2B-AS1	ischemic stroke
CDKN2B-AS1	ischemic heart failure
CDKN2B-AS1	intracranial aneurysm
CDKN2B-AS1	intracranial aneurysm
CDKN2B-AS1	intracranial aneurysm
CDKN2B-AS1	intracranial aneurysm
CDKN2B-AS1	intracranial aneurysm
CDKN2B-AS1	intracranial aneurysm
CDKN2B-AS1	intracranial aneurysm
CDKN2B-AS1	hypertension
CDKN2B-AS1	hereditary cutaneous malignant melanoma
CDKN2B-AS1	hepatocellular cancer
CDKN2B-AS1	hepatocellular cancer
CDKN2B-AS1	hepatocellular cancer
CDKN2B-AS1	glioma
CDKN2B-AS1	glioma
CDKN2B-AS1	glioma
CDKN2B-AS1	glioma
CDKN2B-AS1	glioma
CDKN2B-AS1	glioma
CDKN2B-AS1	glaucoma
CDKN2B-AS1	glaucoma
CDKN2B-AS1	glaucoma
CDKN2B-AS1	glaucoma
CDKN2B-AS1	gastric cancer
CDKN2B-AS1	gastric cancer
CDKN2B-AS1	gastric cancer
CDKN2B-AS1	gastric cancer
CDKN2B-AS1	gallbladder cancer
CDKN2B-AS1	frailty
CDKN2B-AS1	esophageal squamous cell cancer
CDKN2B-AS1	esophageal cancer
CDKN2B-AS1	endometriosis
CDKN2B-AS1	endometriosis
CDKN2B-AS1	endometriosis
CDKN2B-AS1	diabetes
CDKN2B-AS1	diabetes
CDKN2B-AS1	diabetes
CDKN2B-AS1	coronary heart disease
CDKN2B-AS1	coronary heart disease
CDKN2B-AS1	coronary disease
CDKN2B-AS1	coronary disease
CDKN2B-AS1	coronary disease
CDKN2B-AS1	coronary disease
CDKN2B-AS1	coronary artery disease
CDKN2B-AS1	coronary artery disease
CDKN2B-AS1	coronary artery disease
CDKN2B-AS1	coronary artery disease
CDKN2B-AS1	coronary artery disease
CDKN2B-AS1	coronary artery disease
CDKN2B-AS1	coronary artery disease
CDKN2B-AS1	colorectal cancer
CDKN2B-AS1	colorectal cancer
CDKN2B-AS1	colorectal cancer
CDKN2B-AS1	cervical cancer
CDKN2B-AS1	cervical cancer
CDKN2B-AS1	cardiovascular disease
CDKN2B-AS1	cardiovascular disease
CDKN2B-AS1	cardiovascular disease
CDKN2B-AS1	cardiovascular disease
CDKN2B-AS1	cancer
CDKN2B-AS1	cancer
CDKN2B-AS1	cancer
CDKN2B-AS1	cancer
CDKN2B-AS1	cancer
CDKN2B-AS1	cancer
CDKN2B-AS1	cancer
CDKN2B-AS1	cancer
CDKN2B-AS1	cancer
CDKN2B-AS1	breast cancer
CDKN2B-AS1	breast cancer
CDKN2B-AS1	breast cancer
CDKN2B-AS1	breast cancer
CDKN2B-AS1	breast cancer
CDKN2B-AS1	bladder cancer
CDKN2B-AS1	basal cell cancer
CDKN2B-AS1	basal cell cancer
CDKN2B-AS1	atherosclerosis
CDKN2B-AS1	atherosclerosis
CDKN2B-AS1	atherosclerosis
CDKN2B-AS1	atherosclerosis
CDKN2B-AS1	atherosclerosis
CDKN2B-AS1	atherosclerosis
CDKN2B-AS1	atherosclerosis
CDKN2B-AS1	atherosclerosis
CDKN2B-AS1	atherosclerosis
CDKN2B-AS1	atherosclerosis
CDKN2B-AS1	atherosclerosis
CDKN2B-AS1	atherosclerosis
CDKN2B-AS1	aortic aneurysm
CDKN2B-AS1	alzheimer's disease
CDKN2B-AS1	alzheimer's disease
CDKN2B-AS1	acute myocardial infarction
CDKN2B-AS1	acute lymphoblastic leukemia
CDKN2B-AS1	acute lymphoblastic leukemia
CDKN2B-AS1	acute lymphoblastic leukemia
CDKN2B-AS1	acute lymphoblastic leukemia
CDKN2B-AS1	abdominal aortic aneurysm
CEBPA-AS1	gastric cancer
CECR5-AS1	cat eye syndrome
CECR9	cat eye syndrome
CERNA1	cardiovascular disease
CERNA2	hepatocellular cancer
CERNA2	epithelial ovarian cancer
CFLAR-AS1	esophageal squamous cell cancer
CLRN1-AS1	usher syndrome type 3
CSMD2-AS1	early-onset preeclampsia
CYP51A1-AS1	renal cell cancer
DANCR	prostate cancer
DANCR	prostate cancer
DANCR	postmenopausal osteoporosis
DANCR	osteosarcoma
DANCR	hepatocellular cancer
DANCR	colorectal cancer
DANCR	breast cancer
DANCR	bone diseases
DDN-AS1	bladder cancer
DGCR5	velocardiofacial syndrome
DGCR5	huntington disease
DGCR5	diGeorge syndrome
DGCR5	diGeorge syndrome
DGCR5	clear cell renal cell cancer
DLEU1	myeloma
DLEU1	multiple myeloma
DLEU1	lymphoma
DLEU1	lymphoma
DLEU1	lymphocytic leukemia
DLEU1	inherited bone marrow failure disorder
DLEU1	hematopoietic and solid tumors
DLEU1	head and neck squamous cell cancer
DLEU1	chronic lymphocytic leukemia
DLEU1	chronic lymphocytic leukemia
DLEU1	chronic lymphocytic leukemia
DLEU1	chronic lymphocytic leukemia
DLEU1	breast cancer
DLEU1	B-cell chronic lymphocytic leukemia
DLEU1	B-cell chronic lymphocytic leukemia
DLEU1	B-cell chronic lymphocytic leukemia
DLEU2	non-small cell lung cancer
DLEU2	myeloma
DLEU2	multiple myeloma
DLEU2	lymphocytic leukemia
DLEU2	lymphocytic leukemia
DLEU2	chronic lymphocytic leukemia
DLEU2	chronic lymphocytic leukemia
DLEU2	chronic lymphocytic leukemia
DLEU2	chronic lymphocytic leukemia
DLEU2	chronic lymphocytic leukemia
DLEU2	B-cell chronic lymphocytic leukemia
DLEU2	B-cell chronic lymphocytic leukemia
DM1-AS	myotonic dystrophy type 1
DNM3OS	epithelial ovarian cancer
DPP10-AS1	colorectal cancer
DPP10-AS1	breast cancer
DSCAM-AS1	breast cancer
DSCAM-AS1	breast cancer
DSCAM-AS1	breast cancer
DSCAM-AS1	adolescent idiopathic scoliosis
DUBR	asthma and chronic obstructive pulmonary disease
EGFR-AS1	hepatocellular cancer
EGOT	prostate cancer
EGOT	breast cancer
ELF3-AS1	papillary thyroid cancer
ENST00000415964	pediatric acute myeloid leukemia
ENST00000433673	polycystic ovary syndrome
ENST00000434223	lung adenocarcinoma
ENST00000442037	lung adenocarcinoma
ENST00000454271	polycystic ovary syndrome
ENST00000455309	primary Sjögren's syndrome
ENST00000456816	clear cell renal cell cancer
ENST00000503938	triple-negative breast cancer
ENST00000539009	colorectal cancer
ENST00000540136	lung adenocarcinoma
ENST00000544591	colorectal cancer
ENST00000545440	pediatric acute myeloid leukemia
ENST00000547963.1	esophageal squamous cell cancer
EPB41L4A-AS1	lung cancer
EPB41L4A-AS1	cancer
ESRG	embryonal cancer
EWSAT1	ewing sarcoma
FALEC	thyroid cancer
FALEC	ovarian cancer
FALEC	ovarian cancer
FAM111A-DT	UVB-irradiated KC & non-melanoma skin cancer
FAM160A1-DT	colorectal cancer
FAM201A	leukemia
FAM30A	gallbladder cancer
FAS-AS1	ataxia telangiectasia
FENDRR	osteosarcoma
FENDRR	non-small cell lung cancer
FENDRR	lung cancer
FENDRR	gastric cancer
FEZF1-AS1	gastric cancer
FEZF1-AS1	colorectal cancer
FOXC2-AS1	osteosarcoma
FOXC2-AS1	osteosarcoma
FOXC2-AS1	osteosarcoma
FOXD3-AS1	glioma
FRGCA	gastric cancer
FTX	hepatocellular cancer
FTX	hepatocellular cancer
FTX	hepatocelluar cancer
FTX	colorectal cancer
FTX	breast cancer
GACAT2	pancreatic cancer
GACAT2	non-small cell lung cancer
GACAT2	gastric cancer
GACAT3	ovarian cancer
GACAT3	gastric cancer
GACAT3	gastric cancer
GACAT3	gastric cancer
GAS1RR	breast cancer
GAS5	varicose great saphenous veins
GAS5	type 2 diabetes
GAS5	renal cell cancer
GAS5	prostate cancer
GAS5	prostate cancer
GAS5	prostate cancer
GAS5	prostate cancer
GAS5	prostate cancer
GAS5	prostate cancer
GAS5	prostate cancer
GAS5	pleural mesothelioma
GAS5	pancreatic cancer
GAS5	ovarian cancer
GAS5	ovarian cancer
GAS5	osteoarthritis
GAS5	osteoarthritis
GAS5	non-small cell lung cancer
GAS5	non-small cell lung cancer
GAS5	non-small cell lung cancer
GAS5	multiple myeloma
GAS5	melanoma
GAS5	melanoma
GAS5	melanoma
GAS5	lymphoma
GAS5	lymphoma
GAS5	lymphoma
GAS5	lung cancer
GAS5	lung adenocarcinoma
GAS5	lung adenocarcinoma
GAS5	liver fibrosis
GAS5	kidney cancer
GAS5	hypertension
GAS5	hepatocellular cancer
GAS5	hepatocellular cancer
GAS5	hepatocellular cancer
GAS5	hepatocellular cancer
GAS5	hepatocelluar cancer
GAS5	head and neck cancer
GAS5	glioma
GAS5	gastric cancer
GAS5	gastric cancer
GAS5	gastric cancer
GAS5	gastric cancer
GAS5	gastric cancer
GAS5	endometrial cancer
GAS5	colorectal cancer
GAS5	colorectal cancer
GAS5	colorectal cancer
GAS5	colorectal cancer
GAS5	cervical cancer
GAS5	cervical cancer
GAS5	cancer
GAS5	cancer
GAS5	cancer
GAS5	cancer
GAS5	breast cancer
GAS5	breast cancer
GAS5	breast cancer
GAS5	breast cancer
GAS5	breast cancer
GAS5	breast cancer
GAS5	breast cancer
GAS5	breast cancer
GAS5	breast cancer
GAS5	bladder cancer
GAS5	bladder cancer
GAS5	B-cell neoplasms
GAS5	autoimmune disease
GAS5	autoimmune disease
GASAL1	liver cancer
GATA3-AS1	renal cell cancer
GDNF-AS1	alzheimer's disease
GPRC5D-AS1	colorectal cancer
GSEC	colorectal cancer
HAND2-AS1	neuroblastoma
HAR1B	huntington disease
HAR1B	huntington disease
HAR1B	hereditary haemorrhagic telangiectasia
HAR1B	alzheimer's disease
HDAC2-AS2	early-onset preeclampsia
HDHD5-AS1	cat eye syndrome
HIF1A-AS1	thoracoabdominal aorta aneurysm
HIF1A-AS1	thoracoabdominal aorta aneurysm
HIF1A-AS1	non-small cell lung cancer
HIF1A-AS1	kidney cancer
HIF1A-AS1	kidney cancer
HIF1A-AS1	kidney cancer
HIF1A-AS1	cardiovascular disease
HIF1A-AS1	aortic aneurysm
HIF1A-AS1	acute myocardial infarction
HIF1A-AS2	renal cancer
HIF1A-AS2	osteosarcoma
HIF1A-AS2	kidney cancer
HIF1A-AS2	kidney cancer
HIF1A-AS2	glioblastoma
HIF1A-AS2	gastric cancer
HIF1A-AS2	breast cancer
HIF1A-AS2	bladder cancer
HIF1A-AS2	acute myocardial infarction
HNF1A-AS1	pancreatic cancer
HNF1A-AS1	osteosarcoma
HNF1A-AS1	nasopharyngeal cancer
HNF1A-AS1	lung adenocarcinoma
HNF1A-AS1	hepatocellular cancer
HNF1A-AS1	gastric cancer
HNF1A-AS1	esophageal squamous cell cancer
HNF1A-AS1	esophageal adenocarcinoma
HNF1A-AS1	adenocarcinoma
HORMAD2-AS1	type 1 diabetes
HORMAD2-AS1	bowel disease
HOTAIR	urothelial cancer
HOTAIR	triple-negative breast cancer
HOTAIR	temporomandibular joint osteoarthritis
HOTAIR	small cell lung cancer
HOTAIR	small cell lung cancer
HOTAIR	sarcoma
HOTAIR	rheumatoid arthritis
HOTAIR	renal cell cancer
HOTAIR	renal cell cancer
HOTAIR	renal cancer
HOTAIR	prostate cancer
HOTAIR	prostate cancer
HOTAIR	prostate cancer
HOTAIR	prostate cancer
HOTAIR	prostate cancer
HOTAIR	pre-eclampsia
HOTAIR	pituitary adenoma
HOTAIR	Parkinson's disease
HOTAIR	papillary thyroid cancer
HOTAIR	papillary thyroid cancer
HOTAIR	pancreatic ductal adenocarcinoma
HOTAIR	pancreatic cancer
HOTAIR	pancreatic cancer
HOTAIR	pancreatic cancer
HOTAIR	pancreatic cancer
HOTAIR	ovarian cancer
HOTAIR	ovarian cancer
HOTAIR	ovarian cancer
HOTAIR	ovarian cancer
HOTAIR	ovarian cancer
HOTAIR	ovarian cancer
HOTAIR	ovarian cancer
HOTAIR	ovarian cancer
HOTAIR	ovarian cancer
HOTAIR	ovarian cancer
HOTAIR	ovarian cancer
HOTAIR	ovarian cancer
HOTAIR	ovarian cancer
HOTAIR	ovarian cancer
HOTAIR	ovarian cancer
HOTAIR	osteosarcoma
HOTAIR	osteosarcoma
HOTAIR	osteosarcoma
HOTAIR	osteoarthritis
HOTAIR	oral squamous cell cancer
HOTAIR	oral squamous cell cancer
HOTAIR	oral squamous cell cancer
HOTAIR	oral squamous cell cancer
HOTAIR	non-small cell lung cancer
HOTAIR	non-small cell lung cancer
HOTAIR	non-small cell lung cancer
HOTAIR	non-small cell lung cancer
HOTAIR	nasopharyngeal cancer
HOTAIR	nasopharyngeal cancer
HOTAIR	nasopharyngeal cancer
HOTAIR	multiple myeloma
HOTAIR	melanoma
HOTAIR	lung cancer
HOTAIR	lung cancer
HOTAIR	lung cancer
HOTAIR	lung cancer
HOTAIR	lung cancer
HOTAIR	lung cancer
HOTAIR	lung cancer
HOTAIR	lung cancer
HOTAIR	lung cancer
HOTAIR	lung adenocarcinoma
HOTAIR	lung adenocarcinoma
HOTAIR	lung adenocarcinoma
HOTAIR	lung adenocarcinoma
HOTAIR	LPS-induced sepsis
HOTAIR	liver cancer
HOTAIR	liver cancer
HOTAIR	liver cancer
HOTAIR	laryngeal squamous cell cancer
HOTAIR	laryngeal squamous cell cancer
HOTAIR	laryngeal squamous cell cancer
HOTAIR	laryngeal squamous cell cancer
HOTAIR	laryngeal squamous cell cancer
HOTAIR	large B-Cell lymphoma
HOTAIR	ischemic stroke
HOTAIR	ischemic heart failure
HOTAIR	infiltrating ductal cancers
HOTAIR	hepatocellular cancer
HOTAIR	hepatocellular cancer
HOTAIR	hepatocellular cancer
HOTAIR	hepatocellular cancer
HOTAIR	hepatocelluar cancer
HOTAIR	hepatocelluar cancer
HOTAIR	hepatocelluar cancer
HOTAIR	hepatocelluar cancer
HOTAIR	hepatocelluar cancer
HOTAIR	hepatocelluar cancer
HOTAIR	head and neck squamous cell cancer
HOTAIR	glioma
HOTAIR	glioma
HOTAIR	glioma
HOTAIR	glioma
HOTAIR	glioma
HOTAIR	glioblastoma
HOTAIR	glioblastoma
HOTAIR	glioblastoma
HOTAIR	glioblastoma
HOTAIR	gastrointestinal stromal tumor
HOTAIR	gastrointestinal stromal tumor
HOTAIR	gastrointestinal cancer
HOTAIR	gastric cardia adenocarcinoma
HOTAIR	gastric cancer
HOTAIR	gastric cancer
HOTAIR	gastric cancer
HOTAIR	gastric cancer
HOTAIR	gastric cancer
HOTAIR	gastric cancer
HOTAIR	gastric cancer
HOTAIR	gastric cancer
HOTAIR	gastric cancer
HOTAIR	gastric cancer
HOTAIR	gastric cancer
HOTAIR	gastric cancer
HOTAIR	gastric cancer
HOTAIR	gastric cancer
HOTAIR	gastric cancer
HOTAIR	gastric cancer
HOTAIR	gastric cancer
HOTAIR	gastric cancer
HOTAIR	gastric adenocarcinoma
HOTAIR	gastric adenocarcinoma
HOTAIR	gallbladder cancer
HOTAIR	esophageal squamous cell cancer
HOTAIR	esophageal squamous cell cancer
HOTAIR	esophageal squamous cell cancer
HOTAIR	esophageal squamous cell cancer
HOTAIR	esophageal squamous cell cancer
HOTAIR	esophageal squamous cell cancer
HOTAIR	esophageal squamous cell cancer
HOTAIR	esophageal squamous cell cancer
HOTAIR	esophageal squamous cell cancer
HOTAIR	endometrial cancer
HOTAIR	endometrial cancer
HOTAIR	endometrial cancer
HOTAIR	endometrial cancer
HOTAIR	endometrial cancer
HOTAIR	diffuse large B-cell lymphoma
HOTAIR	colorectal cancer
HOTAIR	colorectal cancer
HOTAIR	colorectal cancer
HOTAIR	colorectal cancer
HOTAIR	colorectal cancer
HOTAIR	colorectal cancer
HOTAIR	colorectal cancer
HOTAIR	colorectal cancer
HOTAIR	colorectal cancer
HOTAIR	colorectal cancer
HOTAIR	colorectal cancer
HOTAIR	colorectal cancer
HOTAIR	colorectal cancer
HOTAIR	colorectal cancer
HOTAIR	cervical cancer
HOTAIR	cervical cancer
HOTAIR	cervical cancer
HOTAIR	cervical cancer
HOTAIR	cervical cancer
HOTAIR	cervical cancer
HOTAIR	cervical cancer
HOTAIR	cervical cancer
HOTAIR	cervical cancer
HOTAIR	cervical cancer
HOTAIR	cervical cancer
HOTAIR	cervical cancer
HOTAIR	cervical cancer
HOTAIR	cervical cancer
HOTAIR	cancer
HOTAIR	cancer
HOTAIR	cancer
HOTAIR	cancer
HOTAIR	breast cancer
HOTAIR	breast cancer
HOTAIR	breast cancer
HOTAIR	breast cancer
HOTAIR	breast cancer
HOTAIR	breast cancer
HOTAIR	breast cancer
HOTAIR	breast cancer
HOTAIR	breast cancer
HOTAIR	breast cancer
HOTAIR	breast cancer
HOTAIR	breast cancer
HOTAIR	breast cancer
HOTAIR	breast cancer
HOTAIR	breast cancer
HOTAIR	breast cancer
HOTAIR	breast cancer
HOTAIR	breast cancer
HOTAIR	breast cancer
HOTAIR	breast cancer
HOTAIR	breast cancer
HOTAIR	breast cancer
HOTAIR	breast cancer
HOTAIR	breast cancer
HOTAIR	breast cancer
HOTAIR	breast cancer
HOTAIR	breast cancer
HOTAIR	breast cancer
HOTAIR	breast cancer
HOTAIR	breast cancer
HOTAIR	breast cancer
HOTAIR	breast cancer
HOTAIR	breast cancer
HOTAIR	breast cancer
HOTAIR	breast cancer
HOTAIR	breast cancer
HOTAIR	breast cancer
HOTAIR	bladder transitional cell cancer
HOTAIR	bladder cancer
HOTAIR	bladder cancer
HOTAIR	bladder cancer
HOTAIR	bladder cancer
HOTAIR	B-cell neoplasms
HOTAIR	atypical teratoid rhabdoid tumor
HOTAIR	asthenozoospermia
HOTAIR	aortic valve calcification
HOTAIR	acute myeloid leukemia
HOTAIR	acute myeloid leukemia
HOTAIR	acute myeloid leukemia
HOTAIR	acute leukemia
HOXA11-AS	uterine cervix cancer
HOXA11-AS	ovarian cancer
HOXA11-AS	glioma
HOXA11-AS	gastric cancer
HOXA11-AS	cervical cancer
HTT-AS	huntington disease
HTT-AS	huntington disease
HULC	prostate cancer
HULC	papillary thyroid cancer
HULC	pancreatic cancer
HULC	pancreatic cancer
HULC	osteosarcoma
HULC	osteosarcoma
HULC	osteosarcoma
HULC	liver cirrhosis
HULC	liver cancer
HULC	liver cancer
HULC	liver cancer
HULC	hepatocellular cancer
HULC	hepatocellular cancer
HULC	hepatocellular cancer
HULC	hepatocellular cancer
HULC	hepatocellular cancer
HULC	hepatocellular cancer
HULC	hepatocellular cancer
HULC	hepatocellular cancer
HULC	hepatocellular cancer
HULC	hepatocellular cancer
HULC	hepatocellular cancer
HULC	hepatocellular cancer
HULC	hepatocellular cancer
HULC	hepatocelluar cancer
HULC	hepatocelluar cancer
HULC	hepatocelluar cancer
HULC	hepatocelluar cancer
HULC	hepatocelluar cancer
HULC	hepatocelluar cancer
HULC	hepatocelluar cancer
HULC	glioma
HULC	gastric cancer
HULC	gastric cancer
HULC	gastric cancer
HULC	gastric cancer
HULC	gastric cancer
HULC	esophageal cancer
HULC	diffuse large B-cell lymphoma
HULC	colorectal cancer
HULC	colorectal cancer
HULC	colorectal cancer
HULC	cervical cancer
HULC	atherosclerosis
HYMAI	transient neonatal diabetes
HYMAI	transient neonatal diabetes
INHBA-AS1	gastric cancer
INO80-AS1	early-onset preeclampsia
KAZN-AS1	breast cancer
KCNQ1DN	wilms' tumor
KCNQ1DN	aging
KIF25-AS1	ovarian cancer
LEF1-AS1	hereditary haemorrhagic telangiectasia
LEF1-AS1	colorectal cancer
LINC00115	lung adenocarcinoma
CYTOR	renal cell cancer
CYTOR	pancreatic cancer
CYTOR	hepatocellular cancer
CYTOR	hepatocellular cancer
CYTOR	gastric cancer
CYTOR	gastric cancer
CYTOR	gastric cancer
CYTOR	gastric cancer
CYTOR	gastric cancer
CYTOR	gastric cancer
CYTOR	gastric cancer
CYTOR	gastric cancer
CYTOR	colorectal cancer
CYTOR	breast cancer
LINC00160	breast cancer
LINC00160	breast cancer
LINC00226	pancreaticsductaladenocarcinoma
LINC00244	preaxial polydactyly
LINC00261	pancreatic cancer
LINC00261	non-small cell lung cancer
LINC00261	gastric cancer
LINC00261	gastric cancer
LINC00261	gastric cancer
LINC00313	lung cancer
LINC00323	hereditary haemorrhagic telangiectasia
LINC00323	breast cancer
LINC00364	hepatocellular cancer
LINC00365	esophageal cancer
LINC00460	colorectal cancer
LINC00472	ovarian cancer
LINC00472	breast cancer
LINC00472	breast cancer
LINC00473	renal cell cancer
LINC00473	non-small cell lung cancer
LINC00491	pancreatic ductal adenocarcinoma
LINC00578	major depression disorder
LINC00581	west syndrome
LINC00581	west syndrome
LINC00589	hepatocellular cancer
LINC00599	diabetes
LINC00620	cervical cancer
LINC00623	nasopharyngeal cancer
LINC00635	lung cancer
LINC00649	adolescent idiopathic scoliosis
LINC00673	type 2 diabetes
LINC00673	pancreatic ductal adenocarcinoma
LINC00673	pancreatic cancer
LINC00673	non-small cell lung cancer
LINC00673	melanoma
LINC00675	pancreatic ductal adenocarcinoma
LINC00682	hepatocellular cancer
LINC00850	duchenne muscular dystrophy
LINC00850	duchenne muscular dystrophy
LINC00887	renal clear cell cancer
LINC00887	hypoxic and inflammatory renal epithelial injury
LINC00941	hepatocellular cancer
LINC00968	non-small cell lung cancer
LINC00969	lung squamous cell cancer
LINC00970	non-small cell lung cancer
LINC00973	colorectal cancer
LINC00977	primary spontaneous pneumothorax
LINC00982	gastric cancer
LINC00982	gastric cancer
LINC00993	breast cancer
LINC01020	hereditary haemorrhagic telangiectasia
MALINC1	human breast and lung cancer
LINC01029	cognitive functions and neuronal plasticity
LINC01080	alzheimer's disease
LINC01082	alveolar capillary dysplasia with misalignment of pulmonary veins
LINC01090	post-traumatic stress disorder
LINC01105	leukemia and neuroblastoma
LINC01105	gastric cancer
LINC01139	hereditary haemorrhagic telangiectasia
LINC01158	glioma
LINC01158	gastric cancer
LINC01158	esophageal squamous cell cancer
LINC01191	influenza A virus
LINC01198	glioma
LINC01207	lung adenocarcinoma
LINC01225	hepatocellular cancer
LINC01225	hepatocelluar cancer
LINC01230	cardiometabolic disease
LINC01262	Parkinson's disease
LINC01296	colorectal cancer
LINC01405	breast cancer
LINC01433	lung cancer
LINC01433	lung cancer
LINC01478	blood pressure
LINC01503	tongue squamous cell cancer
LINC01554	esophageal cancer
LINC01562	intervertebral disc degeneration
LINC01564	prostate cancer
LINC01564	prostate cancer
LINC01574	type 2 diabetes
LINC01587	neuroblastoma
LINC01611	diabetic retinopathy
LINC01612	gastric cancer
LINC01613	idiopathic pulmonary fibrosis
LINC01627	non-small cell lung cancer
LINC01628	non-small cell lung cancer
LINC01629	hypoxic and inflammatory renal epithelial injury
LINC01630	colorectal cancer
LINC01630	colorectal cancer
LINC01684	nonalcoholic fatty liver disease
LINC01816	gastric cancer
LINC01844	hirschsprung disease
LINC01857	tuberculosis
LINC01952	recurrent miscarriage
LINC02081	esophageal cancer
LINC02154	esophageal cancer
LINC02156	esophageal cancer
LINC02158	breast cancer
LINC02224	active tuberculosis
LINC02231	Esophageal squamous cell cancer
LINC02243	lung squamous cell cancer
LINC02245	ovarian cancer
LINC02247	early-onset preeclampsia
LINC02487	squamous cell cancer
LINC02551	cystic fibrosis
LINC02561	cystic fibrosis
LINC02567	attention deficit hyperactivity disorder
LINC02572	epithelial ovarian cancer
LINC02575	UVB-irradiated KC & non-melanoma skin cancer
LINCMD1	duchenne muscular dystrophy
LINP1	breast cancer
LMCD1-AS1	acute kidney injury
LOH12CR2	pre-B acute lymphoblastic leukaemia
LOXL1-AS1	exfoliation syndrome
LRRC75A-AS1	rheumatoid arthritis
LRRC8C-DT	endometrial cancer
LUNAR1	T cell acute lymphoblastic leukemia
LUNAR1	diffuse large B-cell lymphoma
LY6E-DT	ovarian cancer
MAFA-AS1	non-small cell lung cancer
MAFA-AS1	lung adenocarcinoma
MAGI2-AS3	early-onset preeclampsia
MAP3K20-AS1	gastric cancer
MEF2C-AS2	diffuse large B-cell lymphoma
MEG3	wilms' tumor
MEG3	vulvar squamous cell cancer
MEG3	type 2 diabetes
MEG3	type 1 diabetes
MEG3	tongue squamous cell cancer
MEG3	tongue squamous cell cancer
MEG3	thrombocytopenic purpura
MEG3	testicular germ cell tumor
MEG3	stroke
MEG3	retinoblastoma
MEG3	retinoblastoma
MEG3	renal cell cancer
MEG3	prostate cancer
MEG3	prostate cancer
MEG3	prostate cancer
MEG3	primary myelofibrosis
MEG3	pituitary adenoma
MEG3	pituitary adenoma
MEG3	pituitary adenoma
MEG3	pituitary adenoma
MEG3	pituitary adenoma
MEG3	pituitary adenoma
MEG3	pituitary adenoma
MEG3	pituitary adenoma
MEG3	pituitary adenoma
MEG3	phaeochromocytoma
MEG3	papillary thyroid cancer
MEG3	pancreatic neuroendocrine tumor
MEG3	pancreatic cancer
MEG3	osteosarcoma
MEG3	osteoarthritis
MEG3	oral squamous cell cancer
MEG3	non-small cell lung cancer
MEG3	non-small cell lung cancer
MEG3	non-small cell lung cancer
MEG3	non-functioning pituitary adenoma
MEG3	non-functioning pituitary adenoma
MEG3	non-functioning pituitary adenoma
MEG3	non-functioning pituitary adenoma
MEG3	neuroblastoma
MEG3	nasopharyngeal cancer
MEG3	myelodysplastic syndrome
MEG3	multiple myeloma
MEG3	multiple myeloma
MEG3	metabolic syndrome
MEG3	meningioma
MEG3	meningioma
MEG3	lung cancer
MEG3	lung adenocarcinoma
MEG3	lung adenocarcinoma
MEG3	liver fibrosis
MEG3	kidney cancer
MEG3	huntington disease
MEG3	heroin abuse
MEG3	hepatocellular cancer
MEG3	hepatocellular cancer
MEG3	hepatocellular cancer
MEG3	hepatocellular cancer
MEG3	hepatocellular cancer
MEG3	hepatocellular cancer
MEG3	hepatocellular cancer
MEG3	hepatocelluar cancer
MEG3	hepatocelluar cancer
MEG3	glioma
MEG3	glioma
MEG3	glioma
MEG3	glioma
MEG3	gastric cancer
MEG3	gastric cancer
MEG3	gastric cancer
MEG3	gastric cancer
MEG3	gastric cancer
MEG3	gallbladder cancer
MEG3	esophageal squamous cell cancer
MEG3	epithelial ovarian cancer
MEG3	endometrial cancer
MEG3	drug abuse
MEG3	diabetes
MEG3	diabetes
MEG3	colorectal cancer
MEG3	colorectal cancer
MEG3	colorectal cancer
MEG3	chronic myeloid leukemia
MEG3	cholestatic liver injury
MEG3	cervical cancer
MEG3	cervical cancer
MEG3	cervical cancer
MEG3	cervical cancer
MEG3	cervical cancer
MEG3	cancer
MEG3	breast cancer
MEG3	breast cancer
MEG3	bladder cancer
MEG3	bladder cancer
MEG3	bladder cancer
MEG3	bladder cancer
MEG3	bladder cancer
MEG3	acute myeloid leukemia
MEG8	temple syndrome
MEG8	prader-willi syndrome and angelman syndrome
MESTIT1	silver-russell syndrome
MHENCR	melanoma
MHRT	heart hypertrophy
MHRT	acute myocardial infarction
MIAT	schizophrenia
MIAT	schizophrenia
MIAT	prostate cancer
MIAT	myocardial infarction
MIAT	myocardial infarction
MIAT	myocardial infarction
MIAT	myocardial infarction
MIAT	myocardial infarction
MIAT	lung adenocarcinoma
MIAT	drug abuse
MIAT	drug abuse
MIAT	dilated cardiomyopathy
MIAT	diabetic retinopathy
MIAT	diabetes-induced microvascular dysfunction
MIAT	chronic lymphocytic leukemia
MIAT	cancer
MIAT	alzheimer's disease
MIAT	acute myocardial infarction
MINCR	gallbladder cancer
MINCR	burkitt lymphoma
MIR100HG	neuroblastoma
MIR100HG	myopia
MIR100HG	myeloid leukemia
MIR100HG	cervical cancer
MIR137HG	schizophrenia
MIR137HG	schizophrenia
MIR137HG	malignant lymphoma
MIR137HG	lung cancer
MIR155HG	glioma
MIR155HG	glioma
MIR155HG	chronic lymphocytic leukemia
MIR155HG	breast cancer
MIR155HG	B-cell chronic lymphocytic leukemia
MIR17HG	syndromic developmental defect
MIR17HG	diffuse large B-cell lymphoma
MIR17HG	cancer
MIR200CHG	melanoma
MIR222HG	ang II-associated cardiovascular disease
MIR31HG	pancreatic ductal adenocarcinoma
MIR31HG	gastric cancer
MIR31HG	colorectal cancer
MIR31HG	breast cancer
MIR31HG	breast cancer
MIR31HG	bladder cancer
MIR4422HG	diffuse large B-cell lymphoma
MIR4435-2HG	lung cancer
MIR503HG	choriocarcinoma
MIR503HG	choriocarcinoma
MIR99AHG	myeloid leukemia
MNX1-AS1	ovarian cancer
MNX1-AS1	ovarian cancer
MNX1-AS1	colorectal cancer
MNX1-AS2	early-onset preeclampsia
NAMA	papillary thyroid cancer
NAMA	papillary thyroid cancer
NBAT1	renal clear cell cancer
NBAT1	neuroblastoma
NBAT1	neuroblastoma
NBAT1	breast cancer
NEAT1	TDP-43-associated pathological states
NEAT1	systemic lupus erythematosus
NEAT1	renal syndrome
NEAT1	prostate cancer
NEAT1	prostate cancer
NEAT1	Parkinson's disease
NEAT1	paraspeckle disintegration
NEAT1	papillary thyroid cancer
NEAT1	ovarian cancer
NEAT1	ovarian cancer
NEAT1	oral squamous cell cancer
NEAT1	oral squamous cell cancer
NEAT1	obesity
NEAT1	non-small cell lung cancer
NEAT1	non-small cell lung cancer
NEAT1	non-small cell lung cancer
NEAT1	non-small cell lung cancer
NEAT1	non-small cell lung cancer
NEAT1	nasopharyngeal cancer
NEAT1	multiple sclerosis
NEAT1	malignant pleural mesothelioma
NEAT1	lung cancer
NEAT1	leukemia
NEAT1	laryngeal squamous cell cancer
NEAT1	intrauterine growth restriction
NEAT1	infertility
NEAT1	huntington disease
NEAT1	huntington disease
NEAT1	HIV
NEAT1	hepatocellular cancer
NEAT1	glioma
NEAT1	glioma
NEAT1	glioma
NEAT1	gastric cancer
NEAT1	gastric adenocarcinoma
NEAT1	frontotemporal lobar degeneration
NEAT1	esophageal squamous cell cancer
NEAT1	endometrial cancer
NEAT1	colorectal cancer
NEAT1	colorectal cancer
NEAT1	chronic lymphocytic leukemia
NEAT1	breast cancer
NEAT1	breast cancer
NEAT1	breast cancer
NEAT1	bladder cancer
NEAT1	amyotrophic lateral sclerosis
NEAT1	AIDS
NEAT1	acute promyelocytic leukemia
NKILA	tongue squamous cell cancer
NKILA	nasopharyngeal cancer
NKILA	breast cancer
NRAV	influenza A virus
P4HA3-AS1	parkinson's disease
PARAL1	obesity
PARTICL	low-dose irradiation
PAUPAR	uveal melanoma
PAX8-AS1	malignant pleural mesothelioma
PAX8-AS1	cervical cancer
PCA3	prostate cancer
PCA3	prostate cancer
PCA3	prostate cancer
PCA3	prostate cancer
PCA3	prostate cancer
PCA3	prostate cancer
PCA3	prostate cancer
PCA3	prostate cancer
PCA3	prostate cancer
PCA3	prostate cancer
PCA3	prostate cancer
PCA3	prostate cancer
PCA3	prostate cancer
PCA3	prostate cancer
PCA3	prostate cancer
PCA3	prostate cancer
PCA3	prostate cancer
PCA3	prostate cancer
PCA3	prostate cancer
PCA3	prostate cancer
PCA3	prostate cancer
PCA3	prostate cancer
PCA3	prostate cancer
PCA3	prostate cancer
PCA3	prostate cancer
PCA3	prostate cancer
PCA3	prostate cancer
PCAT1	prostate cancer
PCAT1	prostate cancer
PCAT1	prostate cancer
PCAT1	prostate cancer
PCAT1	prostate cancer
PCAT1	prostate cancer
PCAT1	prostate cancer
PCAT1	prostate cancer
PCAT1	prostate cancer
PCAT1	prostate cancer
PCAT1	lung cancer
PCAT1	hepatocellular cancer
PCAT1	hepatocellular cancer
PCAT1	esophageal squamous cell cancer
PCAT1	colorectal cancer
PCAT1	bladder cancer
PCAT18	prostate cancer
PCAT19	prostatescancer
PCAT29	stomach adenocarcinoma
PCAT29	skin melanoma
PCAT29	renal clear cell cancer
PCAT29	prostate cancer
PCAT29	prostate cancer
PCAT29	lung adenocarcinoma
PCAT29	hepatocellular cancer
PCAT29	glioma
PCAT29	bladder cancer
PCAT5	prostate cancer
PCAT6	triple-negative breast cancer
PCAT6	prostate cancer
PCAT6	lung cancer
PCAT7	prostate cancer
PCF11-AS1	hepatocellular cancer
PCF11-AS1	adolescent idiopathic scoliosis
PCGEM1	prostate cancer
PCGEM1	prostate cancer
PCGEM1	prostate cancer
PCGEM1	prostate cancer
PCGEM1	prostate cancer
PCGEM1	prostate cancer
PCGEM1	prostate cancer
PCGEM1	prostate cancer
PCGEM1	prostate cancer
PCGEM1	prostate cancer
PCGEM1	prostate cancer
PCGEM1	prostate cancer
PCGEM1	prostate cancer
PCGEM1	prostate cancer
PCGEM1	prostate cancer
PCGEM1	prostate cancer
PCGEM1	prostate cancer
PCGEM1	prostate cancer
PCGEM1	prostate cancer
PCGEM1	prostate cancer
PCGEM1	prostate cancer
PCGEM1	prostate cancer
PCGEM1	osteoarthritis
PCGEM1	glioma
PLUT	type 2 diabetes
POU6F2-AS2	oesophageal squamous cell cancer
PPP1R26-AS1	breast cancer
PRKCQ-AS1	adolescent idiopathic scoliosis
PRKG1-AS1	rheumatoid arthritis
PRNCR1	prostate cancer
PRNCR1	prostate cancer
PRNCR1	prostate cancer
PRNCR1	prostate cancer
PRNCR1	prostate cancer
PRNCR1	prostate cancer
PRNCR1	prostate cancer
PRNCR1	prostate cancer
PRNCR1	prostate cancer
PRNCR1	prostate cancer
PRNCR1	prostate cancer
PRNCR1	glioma
PRNCR1	gastric cancer
PRNCR1	colorectal cancer
PRNCR1	colorectal cancer
PTCSC2	papillary thyroid cancer
PTCSC3	thyroid cancer
PTCSC3	papillary thyroid cancer
PTCSC3	papillary thyroid cancer
PTCSC3	papillary thyroid cancer
PTCSC3	papillary thyroid cancer
PTCSC3	papillary thyroid cancer
PTENP1	renal cell cancer
PTENP1	prostate cancer
PTENP1	prostate cancer
PTENP1	hepatocelluar cancer
PTENP1	gastric cancer
PTENP1	cancer
PTENP1	cancer
PVT1	type 2 diabetes
PVT1	type 2 diabetes
PVT1	type 1 diabetes
PVT1	thyroid cancer
PVT1	renal cell cancer
PVT1	renal cancer
PVT1	renal cancer
PVT1	prostate cancer
PVT1	prostate cancer
PVT1	prostate cancer
PVT1	pleural mesothelioma
PVT1	plasmacytoma
PVT1	pancreatic cancer
PVT1	pancreatic cancer
PVT1	pancreatic cancer
PVT1	ovarian cancer
PVT1	ovarian cancer
PVT1	ovarian cancer
PVT1	non-small cell lung cancer
PVT1	non-small cell lung cancer
PVT1	non-small cell lung cancer
PVT1	neuroblastoma
PVT1	murine plasmacytomas
PVT1	multiple myeloma
PVT1	lymphoma
PVT1	lymphoma
PVT1	lung squamous cell cancer
PVT1	lung squamous cell cancer
PVT1	kidney cancer
PVT1	hodgkin's lymphoma
PVT1	hepatocellular cancer
PVT1	hepatocellular cancer
PVT1	hepatocelluar cancer
PVT1	hematological malignancies
PVT1	gastric cancer
PVT1	gastric cancer
PVT1	gastric cancer
PVT1	gastric cancer
PVT1	gastric cancer
PVT1	gastric cancer
PVT1	esophageal cancer
PVT1	diabetic nephropathy
PVT1	diabetic nephropathy
PVT1	diabetic kidney disease
PVT1	colorectal cancer
PVT1	cleft lip
PVT1	cervical cancer
PVT1	cervical cancer
PVT1	cervical cancer
PVT1	cardiac hypertrophy
PVT1	cancer
PVT1	cancer
PVT1	burkitt lymphoma
PVT1	breast cancer
PVT1	breast cancer
PVT1	breast cancer
PVT1	breast cancer
PVT1	bladder cancer
PVT1	B-cell lymphoma
PVT1	asthma
PVT1	acute promyelocytic leukemia
PVT1	acute promyelocytic leukemia
PWAR1	prader-willi syndrome and angelman syndrome
PWRN1	Prader-Willi syndrome
RAD51-AS1	breast cancer
RAMP2-AS1	glioblastoma
RBM5-AS1	tumor
RFPL3S	opitz syndrome
RGMB-AS1	non-small cell lung cancer
RGMB-AS1	lung adenocarcinoma
RNF217-AS1	acute lymphoblastic leukemia
RNF219-AS1	blood pressure
SAMD12-AS1	neuroblastoma
SAMMSON	melanoma
SAMMSON	melanoma
SAMMSON	melanoma
SATB2-AS1	osteosarcoma
SCHLAP1	prostate cancer
SCHLAP1	prostate cancer
SCHLAP1	prostate cancer
SCHLAP1	prostate cancer
SCHLAP1	prostate cancer
SCHLAP1	prostate cancer
SCHLAP1	prostate cancer
SCHLAP1	bladder cancer
SLC25A25-AS1	colorectal cancer
SLC25A25-AS1	colorectal cancer
SMAD5-AS1	malignant hematopoietic
SMIM10L2B-AS1	early-onset preeclampsia
SNHG12	osteosarcoma
SNHG12	endometrial cancer
SNHG15	hereditary haemorrhagic telangiectasia
SNHG15	hepatocellular cancer
SNHG15	gastric cancer
SNHG18	glioma
SNHG26	bladder urothelial cancer
SNHG5	melanoma
SNHG5	lymphoma
SNHG5	gastric cancer
SNHG6	hereditary haemorrhagic telangiectasia
SNHG6	hepatocellular cancer
SNHG7	lung cancer
SNHG8	malignant pleural mesothelioma
SNHG8	gastric cancer
SOCS2-AS1	prostate cancer
SOX2-OT	retinal neurodegeneration
SOX2-OT	neurodevelopmental syndromes associated with the SOX2 locus
SOX2-OT	lung squamous cell cancer
SOX2-OT	lung cancer
SOX2-OT	lung cancer
SOX2-OT	hepatocellular cancer
SOX2-OT	esophageal squamous cell cancer
SOX2-OT	esophageal squamous cell cancer
SOX2-OT	esophageal squamous cell cancer
SOX2-OT	esophageal squamous cell cancer
SOX2-OT	colorectal cancer
SOX2-OT	breast cancer
SOX2-OT	breast cancer
SOX2-OT	breast cancer
SOX2-OT	alzheimer's disease
SPRY4-IT1	renal clear cell cancer
SPRY4-IT1	prostate cancer
SPRY4-IT1	prostate cancer
SPRY4-IT1	prostate cancer
SPRY4-IT1	pre-eclampsia
SPRY4-IT1	non-small cell lung cancer
SPRY4-IT1	non-small cell lung cancer
SPRY4-IT1	non-small cell lung cancer
SPRY4-IT1	melanoma
SPRY4-IT1	melanoma
SPRY4-IT1	melanoma
SPRY4-IT1	melanoma
SPRY4-IT1	melanoma
SPRY4-IT1	lung cancer
SPRY4-IT1	hepatocellular cancer
SPRY4-IT1	glioma
SPRY4-IT1	glioma
SPRY4-IT1	gastric cancer
SPRY4-IT1	gastric cancer
SPRY4-IT1	esophageal squamous cell cancer
SPRY4-IT1	esophageal squamous cell cancer
SPRY4-IT1	esophageal squamous cell cancer
SPRY4-IT1	esophageal squamous cell cancer
SPRY4-IT1	esophageal squamous cell cancer
SPRY4-IT1	colorectal cancer
SPRY4-IT1	colorectal cancer
SPRY4-IT1	cervical cancer
SPRY4-IT1	breast cancer
SPRY4-IT1	bladder cancer
STX18-AS1	atrial septal defect
SVIL-AS1	rheumatoid arthritis
TARID	kidney clear cell sarcoma
TCL6	renal cell cancer
TCL6	leukemia
TCL6	leukemia
TDRG1	testicular cancer
TDRG1	gastric cancer
TDRG1	esophageal squamous cell cancer
TDRG1	aplastic anemia
TH2LCRR	allergic asthma
TMEM92-AS1	hepatocellular cancer
TP53TG1	non-small cell lung cancer
TP53TG1	ataxia telangiectasia
TP73-AS1	oligodendroglial tumors
TP73-AS1	non-small cell lung cancer
TP73-AS1	multiple myeloma
TP73-AS1	glioblastoma
TP73-AS1	esophageal squamous cell cancer
TPT1-AS1	glioma
TRIM52-AS1	renal cell cancer
VLDLR-AS1	hepatocelluar cancer
VPS33B-DT	rheumatoid arthritis
WT1-AS	wilms' tumor
WT1-AS	wilms' tumor
WT1-AS	wilms' tumor
WT1-AS	primary myelofibrosis
WT1-AS	hepatocellular cancer
WT1-AS	gastric cancer
WT1-AS	acute myeloid leukemia
WT1-AS	acute myeloid leukemia
ZEB1-AS1	hepatocelluar cancer
ZEB1-AS1	hepatocelluar cancer
ZEB1-AS1	esophageal squamous cell cancer
ZEB1-AS1	autoimmune thyroid disease
ZEB2-AS1	hepatocellular cancer
ZEB2-AS1	bladder cancer
ZFAS1	hepatocellular cancer
ZFAS1	hepatocellular cancer
ZFAS1	gastric cancer
ZFAS1	gastric cancer
ZFAS1	ductal cancer
ZFAS1	colorectal cancer
ZFAS1	colorectal cancer
ZFAS1	breast cancer
ZNF710-AS1	early-onset preeclampsia
ZNF295-AS1	lung adenocarcinoma
ZNF295-AS1	epithelial ovarian cancer
ZNF503-AS1	age-related macular degeneration
ZNF667-AS1	breast cancer
LINC00467	neuroblastoma
LINC01527	squamous cell cancer
LINC01518	non-melanoma skin cancer
LINC01537	laryngeal squamous cell cancer
KRT7-AS	gastric cancer
LINC00942	ovarian cancer
LINC00942	autism spectrum disorder
LINC01559	huntington disease
LINC00052	hepatocellular cancer
LINC00052	breast cancer
LINC00511	lung adenocarcinoma
LINC00511	breast cancer
LINC00672	endometrial cancer
LINC00974	hepatocellular cancer
LINC00342	non-small cell lung cancer
LINC01101	HPV-induced cervical neoplasia
LINC01116	prostatescancer
LINC01116	glioblastoma
LINC01614	lung cancer
KCNK15-AS1	osteoarthritis
KCNK15-AS1	breast cancer
LAMP5-AS1	acute lymphoblastic leukemia
LINC00163	narcolepsy
LINC00319	lung cancer
LINC01547	down syndrome
LINC00272	prostate cancer
LINC00312	non-small cell lung cancer
LINC00312	nasopharyngeal cancer
LINC00312	nasopharyngeal cancer
LINC00312	nasopharyngeal cancer
LINC00312	nasopharyngeal cancer
LINC00312	bladder cancer
LINC00636	breast cancer
LINC00888	melanoma
LINC00994	inflammatory bowel disease
LINC00951	esophageal squamous cell cancer
LINC01558	ovarian cancer
LINC00998	major depression disorder
LINC00529	keratolytic winter erythema
LINC00094	lung squamous cell cancer
[truncated: 1,773 more rows]
