# Supplementary material for: Integrated multi-omics analysis for lung adenocarcinoma in Xuanwei, China
Source: Aging (Albany NY). 2023 Dec 13;15(23):14263–91. doi: 10.18632/aging.205300 (PMC10756121; doi:10.18632/aging.205300)
Supplement: Supplementary File 3 [file aging-15-205300-s009.xlsx]

## Sheet: up.targetgene
Supplementary File 3. The downstream target genes of the ceRNA.
SCTR
ST6GALNAC1
CELSR3
CA12
DLG3
HSD17B2
TFAP2C
APOH
TBX15
CDC6
SERPIND1
FERMT1
CBLN1
CCL22
MMP15
DECR2
WNT3
HNF1B
COL1A1
TMEM97
PRSS16
DAP
BCL9
NT5C1A
TTR
NCAPH
COL10A1
UNC5CL
HIST1H3B
SOX9
MSTO1
CDC42EP1
HOXD3
NCAPG
GRHL2
FAM155B
TNS4
RAMP1
CCNB1
CHL1
TRIM45
EHF
TROAP
EMX1
BRIP1
ORM1
GABBR2
SLCO5A1
MMP7
NOX5
TMEM62
KIF11
SLC16A7
SLCO1B3
LMNB1
DOK5
CCNE1
TFCP2L1
SYT7
LCT
SRD5A3
GALNT7
EGF
ABCB6
SORD
TICRR
MARVELD3
IMPA2
PLEKHA6
MALL
ABCA12
OCIAD2
DDIT4L
CCNA2
TIMD4
GFRA3
SCUBE3
EGFR
PSPH
EPHA1
RAB19
MPZL2
MYCN
BARX2
TMEM45B
TMEM163
CCNO
STK32B
SLFN13
CYP2C18
DEPTOR
CXCL13
LHFPL4
BUB1B
IL17RB
FAM81A
HIST1H2BD
PDZK1IP1
NMNAT2
GABRB1
ITGA2
F2RL1
TERT
KIAA0895
GALNT10
EN2
TMEM63C
FANCI
PEX11A
TMEM92
PRR15L
CDT1
SIX2
EMB
GPR37
GPRIN1
KIAA1024
FEN1
HIST1H3G
HOXD4
HAS3
CDCA7
CKS1B
ATP6V0A4
FADS6
UGT8
MUC13
SLC29A2
ANKS4B
PRG2
KRT80
CKS2
SKA3
LDLRAD3
FGF13
CLSPN
PAQR4
SGPP2
OAZ3
SPAG5
COL19A1
ANKRD34A
KIF15
ATP10B
PYCR1
IDH2
HIST1H2AK
CDCA2
GLTPD2
HOXD1
TMEM105
PCLO
SOWAHB
PRELID2
FOXD2
TESC
OVOL1
LRAT
PBLD
CXCL14
AP1S1
DNAJB13
NCCRP1
TNC
GPT2
DLK1
SBK1
SLC20A2
FOXM1
ARHGEF39
E2F1
RGS7
ASS1
COL17A1
SCN8A
ATRNL1
LMX1B
C2CD4A
LRRC20
STK39
ACBD7
CDCA7L
CNNM1
COL9A1
ALDH5A1
HHLA2
GAD1
GDA
ZBTB18
HIST1H2AG
XRCC2
C1orf116
KCNK5
STIL
DPP4
RRM2
MEGF11
NOS1AP
TFB2M
KIF26B
KCNK1
SNAP47
CDC42BPA
DNAH14
CENPF
FLVCR1
DTL
NEK2
CR2
SLC41A1
RGS17
SYT2
TMEM9
KIF14
XPR1
SCYL3
ATP1B1
NUF2
CD1E
SLC50A1
MKI67
IVL
TDRKH
C1orf56
HORMAD1
BEND3
HIST1H3H
IGSF3
KCND3
SAMD10
ATP2B3
GOLGA7B
GPC4
HS6ST2
SLC44A5
CRYZ
PKHD1
CEP55
ANKRD22
CCDC24
RHBDL2
EPHA10
GRIK3
SGK2
ERCC6L
MAPK13
SRPK1
RCC1
BICC1
ZWINT
ASAH2B
DRGX
KIF4A
ALPL
FOXE1
SP5
BAMBI
TCF19
MUC21
MAGIX
PSAT1
KCNC3
HIST1H2AH
SHROOM1
NQO1
LRIG3
LGR4
XDH
TFAP2A
NHS
ELAVL2
GYG2
PAPLN
PLCXD1
CYS1
GOLM1
KCNQ3
SYTL2
LAD1
BDH1
CIT
B3GAT1
KCNJ1
GALNT3
VWA2
PTGFRN
BCL2L15
SYT12
HELLS
CACNB1
KIF20A
CDK1
SLC16A9
DLGAP5
ADM2
HECW1
GCNT3
ENAM
WDR72
HNF4G
SEPT3
HIST1H2BK
CCNF
FOXRED2
MANEAL
STK32A
GRIP1
CBS
EVPLL
PLA2G4E
SYT14
C9orf152
KLHDC7A
MMACHC
KIAA1522
ICA1
ELFN2
CEACAM1
TST
KBTBD12
GPSM2
TOX3
XKR9
SAPCD2
STEAP3
DPP10
CERKL
HJURP
ASRGL1
TOP2A
NANOS1
CDKL2
HCAR1
DLX3
C6orf222
ZSCAN31
FMO5
TMEM213
LAPTM4B
DDR1
PROM1
CCDC155
TCEA3
GRID2IP
DGKI
TMEM229A
CSPG5
DEPDC1
MUC1
PLS1
FUT3
C1orf226
EZH2
FRMD5
ONECUT2
CDKN2A
EFNA3
CCSER1
TTK
DHFR
SH3RF2
NME1
FAM83A
ZFHX4
HAVCR1
C1orf210
THNSL1
SLC35F2
E2F8
CREB3L1
SPTBN2
GMDS
MEX3A
SLC22A18AS
ANP32E
CHEK1
TMPRSS4
BUB1
DDAH1
PLD5
MELK
AQP7
CLUL1
ARSE
CKAP2L
NCAPG2
HABP2
PCDH7
CRYM
ABCA13
DNAJC22
CDKN3
RGMA
ONECUT1
SLC22A31
SLC25A10
TMEM159
SMIM6
SPC24
ANKDD1B
HIST1H2BN

## Sheet: down.targetgene
CYP26B1
SEMA3F
PDK4
INMT
MYOC
OTC
CBLN4
SLC2A3
LMCD1
PDZD4
VASH1
PCDHB2
UNC13D
VNN3
ADH1A
PRRT1
TGFBR3
STX1B
PLA2G3
IL2RB
SFRP1
CYP4F3
CAV2
HOXA5
CCL3
P2RX1
ART4
IFNG
KLRB1
LAMA4
GHR
BTNL8
ST8SIA4
PCDH12
SEMA3G
AADAC
ANGPTL1
SELL
FILIP1
TNFAIP3
EGR1
SORBS3
INHBA
LTBP4
PTGIS
CDKN1A
IRF1
CD93
KLF2
F2RL3
GNG11
LRRC4
DLL4
ALDH1A2
ACKR4
CDO1
USHBP1
ZNF331
POPDC3
HSPA12B
SYT4
CHRM3
GIMAP4
TMTC1
LYVE1
SBF2
RNF122
ADAMTS8
HRK
BACH2
ELF5
KCNMB4
NDRG4
ALPK3
SLC31A2
LRRC32
THBS1
TTLL7
HECW2
ABCC9
FAM189A1
NUAK1
CORO2B
MYOM2
SLC4A1
FOXF1
CCM2L
QRICH2
ASPA
PALMD
PPM1F
NOVA2
LIFR
CNTN3
SELP
EPAS1
LRP2
GNLY
KDR
POPDC2
IL18RAP
PCDH10
FGF10
TRPC3
PPARGC1A
DGKG
CDH6
NPR3
STC2
ENPEP
SEMA3A
WNT2
LAMP3
PRKAR2B
CDK6
TIMP3
SLC5A1
SSTR1
MYZAP
NKD1
UNC45B
CDH2
GJA5
ANKRD53
SULT1C4
CSRNP1
SLC10A4
LRRTM2
TMEM140
DENND2A
AWAT2
ADM
SERPING1
MYRF
MYL9
CDC42EP2
VEGFC
CRIM1
PDE3B
FLT1
IGSF10
SYCP2L
KCTD15
DGKE
SEMA3D
ABCA6
FAM167A
WNT3A
WNT7A
DKK2
CA3
GRIA1
VAMP7
ADAMTSL3
UNC5D
PREX2
OLFML2A
SMAD6
NCF1
SCUBE1
STARD9
MT1A
ACE
PTGIR
PRX
CYGB
ITGA5
BCL6B
SLC25A34
DRAXIN
PKDCC
FAM84A
EOMES
CXCL5
PPBP
PF4
MASP1
EMCN
ANKRD33B
AFAP1L1
MDGA1
BMPER
SOX17
SBSPON
GPR146
FAT3
PKNOX2
C10orf25
GAS1
JAM3
AVPR1A
LARP6
CYYR1
CDH23
PPP1R16B
SCNN1G
TMEM88
ABCA3
MN1
KCNK3
ADCYAP1R1
FRMD3
CTNND2
IL17D
ADH1B
P2RY1
NMUR1
S1PR1
DACH1
SOX14
LGI3
ROBO4
CXCL11
CHRM1
SOSTDC1
GIMAP8
SLCO1A2
APLN
RXFP1
SEMA3E
MSRB3
CSPG4
KLRC4
RND1
STON1
KLK10
CPED1
PHOSPHO1
SPSB4
SULT1B1
HEG1
LRCH1
WFIKKN2
CMKLR1
HS3ST5
RNF152
EBF1
BVES
SERTM1
IL20RA
RHOJ
NCAM1
PLAG1
ZBED2
LRCH2
CD300LG
SOBP
LRRN4CL
KANK4
NOS1
PPFIBP1
HTR3C
ZNF366
CXCR2
FIBIN
PSAPL1
LURAP1L
SCD5
CASKIN2
SLC14A1
EHD3
GIPC3
FAM124A
COL12A1
PLCD3
KCNH5
UACA
GPR4
C10orf67
DPY19L2
CRMP1
ANGPT2
PGR
LACC1
FAXDC2
SLC16A6
CBFA2T3
TNFAIP8L3
BTNL9
ST6GALNAC3
NXPH3
HCAR2
OLFML1
ADRA2C
F8
NR4A3
SOCS3
KCND2
C2orf71
KIF21B
IL1R2
COLEC10
FIGN
S1PR5
EGFL8
RGS9BP
SLC51B
PTPRB
CCK
ZBTB16
KIR2DL1
MMP25
STARD13
MS4A15
OTOF
SMTNL2
ZC3H12B
NCR3LG1
PTCHD4
CLIC5
CYP3A5
FPR2
TSPAN18
C2orf88
KLRG2
GATA2
NRXN1
CLEC14A
GJA4
POU2F2
IL7R
GBP5
CXCL12
NKAPL
CLDN18
CYP1A2
TRPC6
TPRG1
DZIP1
PROK2
TCF4
PDE5A
SRGAP1
LTK
CCDC69
FCAR
GBP4
CAB39L
SEMA6D
MYOM1
ARHGEF26
ADAM33
ARC
NRARP
SPTBN1
TMEM71
MUM1L1
FAM212B
CLEC4M
BCO2
ANXA8
AMER2
SYTL5
TMCC2
ANXA8L1
S1PR3
MS4A7
TXLNB
ZNF781
GYPE
TMC2
PDE3A
EDARADD
EMP2
ZDHHC14
SCN3A
MYLK
ENPP1
PCDHB16
LAMC3
PPP1R14C
MVB12B
CALD1
TGM2
PPT2
ST6GAL2
SPRYD7
XAF1
ARHGEF15
CCDC152
CD247
TRIM58
AKT3
ACTN2
DLL1
ATF3
G0S2
MYCT1
LMOD1
PKP1
SASH1
SAMD5
COLGALT2
STX11
KIAA1614
TNR
FMO3
SELE
TCF21
EYA4
DDR2
VNN1
SH2D1B
FCGR3B
CTGF
ADAMTS4
SLAMF6
SH2D2A
NES
HEY2
FAM162B
MARCKS
PRDM1
PLEKHO1
CD160
EPHA7
RBM20
WNT2B
SORCS1
GSTM5
NTNG1
PRRG3
AFF2
GBP1
SLITRK2
HPSE2
HOGA1
ABCA9
PTGER3
SGIP1
LEPR
ROR1
CASS4
NPDC1
IFIT2
TAL1
SLC6A14
ADIRF
MMRN2
CDHR1
NRG3
KLF17
WISP2
JPH2
TOX2
CSF3R
SPOCK2
FAM167B
PI16
LHX6
RTKN2
FAM13C
PRKG1
SYT15
LPAR1
EDA
ID3
KLF4
AOX1
TMEM246
CAMK2N1
TBXA2R
TMEM255B
PADI4
MKX
FAM155A
ID1
FGF14
OTUD1
ANGPTL7
GPC6
GPC5
THBD
NEBL
SCEL
PYGM
ST8SIA6
KLF12
HIF3A
PLEKHG5
PLCXD3
PCSK2
PCDH17
LYPD5
AHNAK
ITGA8
AJAP1
CCL3L3
PKHD1L1
DCDC2
PLCB4
OPTN
BMP2
RBM24
PCYT1B
GATA3
MT1M
LRRC19
KL
ADRA1A
NLGN4X
C11orf21
ADARB2
ESM1
IL33
SNPH
KLRC3
KLRD1
ANGPT4
SEC14L4
RSAD2
IGF2BP2
LATS2
DOK6
CADM2
TRIM71
SH3BP5
CORO6
MYO7B
FAM124B
LILRA6
LILRB2
MYADM
ALPP
QKI
MAG
LGI4
CALCRL
CCDC50
CD300E
MCAM
GRK5
ARHGEF4
SERPINA3
NTNG2
FLT4
MFAP3L
MMRN1
MATK
ZNF365
PCDH15
PRKG2
FERMT2
MLC1
NTRK2
LRRC2
ST8SIA1
PREX1
HOXA3
PGM5
PKIA
RBMS3
GLIPR2
STXBP6
GPER1
ZNF208
APOL3
C17orf67
CXorf36
RGPD2
VGLL3
ERG
CX3CR1
SMAD9
KCNE1
TMEM26
SRL
RUNX3
C22orf34
C20orf202
NFASC
SLC6A4
SVEP1
KIR3DL1
CPE
EFR3B
LIPN
IL6
FGG
ABCB5
PAPOLB
CAV1
CLDN5
CCDC85A
XIRP2
MMP19
LIMS2
SPIRE1
LGALSL
IL18R1
SCN7A
SHANK3
NECAB1
ARRB1
NXPE3
KAZN
LRRN3
THSD7A
PLEKHG2
GJC1
PHACTR2
DOCK4
CLEC1B
C1QTNF7
SYNPO2
FAM198A
CPS1
ARHGAP23
PHLDB2
KCNMB2
VIPR1
SESN1
NLRC5
RARB
COX7A1
CD109
BDNF
C6orf223
CCBE1
AGBL1
FMO2
MRGPRF
DCC
FGF12
OSTN
ITIH5
NLRC3
SCN10A
RGS9
CPEB1
CYR61
IP6K3
MYH11
BTBD19
LILRA1
GPM6B
CFTR
MME
ADCY5
FAM107A
IL12A
ST6GALNAC5
JAM2
GKN2
PEG10
DNASE1L3
KCNT1
MEIS1
GCH1
GIMAP6
SH3TC2
PCP4L1
KCTD16
JAKMIP2
RASGEF1B
INPP4B
BMPR1B
GPX3
EGR3
SLIT3
DENND3
TMEM200B
TRNP1
RUNX1T1
YPEL4
LAYN
GUCY1A2
GRIK4
FLI1
INSC
HCAR3
FZD4
EPB41L2
NAALAD2
RADIL
PHEX
IQSEC3
ADARB1
CDH19
FXYD6
NHSL2
FHL5
MEFV
ZNF662
LDB3
KLF6
SOX5
ACSS3
SOCS2
MGAM
ACVRL1
GRASP
LIN7A
SYNE3
PTGDR
SOX7
C14orf132
SOGA3
GNG2
TMEM229B
ZEB2
LDLR
RGPD1
ITGB3
SYNM
ZNF423
CDH13
CACNA1A
GJD3
CD226
KCNJ12
CD7
DNAH17
HSPB6
TUBB6
CCDC68
PRCD
FOSB
FFAR2
KLK11
MGAT4C
APLNR
