# Supplementary material for: Integrated multi-omics analysis for lung adenocarcinoma in Xuanwei, China
Source: publisher site journal article supplement (doi:10.18632/aging.205300), 2023-12-13
Supplement: Supplementary file [file aging-v15i23-205300-supplementary-material-SD2.pdf]

## SUPPLEMENTARY TABLE

Supplementary Table 1. Patient data of six samples.

| Sample | Patient id | Type      | Age | Sex    | Smoker | Stage | TNM     |
|--------|------------|-----------|-----|--------|--------|-------|---------|
| Ca1    | 1          | Tumor     | 57  | Female | No     | Ia    | TisN0M0 |
| P1     | 1          | Non-tumor | 57  | Female | No     | Ia    | TisN0M0 |
| Ca2    | 2          | Tumor     | 65  | Female | No     | Ia    | TisN0M0 |
| P2     | 2          | Non-tumor | 65  | Female | No     | Ia    | TisN0M0 |
| Ca3    | 3          | Tumor     | 56  | Female | No     | IIIb  | T4N2M0  |
| P3     | 3          | Non-tumor | 56  | Female | No     | IIIb  | T4N2M0  |
