# Supplementary material for: Integrated multi-omics analysis for lung adenocarcinoma in Xuanwei, China
Source: Aging (Albany NY). 2023 Dec 13;15(23):14263–91. doi: 10.18632/aging.205300 (PMC10756121; doi:10.18632/aging.205300)
Supplement: Supplementary Table 2 [file aging-15-205300-s003.xlsx]

## Sheet: Sheet1
Supplementary Table 2. Transcriptomic profiles of six samples.
Sheet	Description
Supplementary Table 2A	Summary of the whole transcriptome sequencing data obtained in this study.
Supplementary Table 2B	Summary of the smallRNA sequencing data obtained in this study.
Supplementary Table 2C	A list of 12,774 genes with FPKM ≥ 1 in LUAD and non-tumor samples.
Supplementary Table 2D	A list of 14,581 lncRNAs in LUAD and non-tumor samples.
Supplementary Table 2E	A list of 5,485 circRNAs in LUAD and non-tumor samples.
Supplementary Table 2F	A list of 3,471 miRNAs in LUAD and non-tumor samples.

## Sheet: Supplementary Table 2A
Sample	Raw reads	Raw bases	Clean reads	Clean bases	Q30 (%)	GC content (%)	Total mapped (%)
P1	110.28M	16.54G	103.33M	14.39G	90.98	48.86	97.24
P2	101.06M	15.16G	94.09M	13.10G	90.47	48.79	97.27
P3	106.72M	16.01G	99.27M	13.77G	90.43	48.9	97.3
Ca1	97.98M	14.70G	91.21M	12.59G	90.46	49.51	97.16
Ca2	117.43M	17.61G	109.61M	15.32G	90.74	48.94	97.21
Ca3	101.66M	15.25G	94.47M	13.16G	90.26	49.28	97.21

## Sheet: Supplementary Table 2B
Sample	Raw reads	Reads trimmed length	Reads trimmed Q20	Clean reads	Total mapped (%)	Unique mapped (%)
P1	30.76M	28.61M	28.59M	28.57M	96.96	78.71
P2	31.41M	28.95M	28.93M	28.90M	96.87	79.88
P3	32.10M	29.51M	29.49M	29.46M	97.01	78.59
Ca1	39.49M	31.84M	31.82M	31.80M	96.51	79.97
Ca2	32.52M	30.19M	30.15M	30.12M	97.1	81.87
Ca3	33.26M	30.59M	30.55M	30.51M	97.24	79.86

## Sheet: Supplementary Table 2C
gene_name	P1_FPKM	P2_FPKM	P3_FPKM	Ca1_FPKM	Ca2_FPKM	Ca3_FPKM	log2FoldChange	pValue	Dbxref	product	GO_id	GO_term	pathway	pathway_description
A2M	252.543	255.989	331.375	253.888	106.337	111.066	-0.949592	0.0113594	GeneID:2,Genbank:NM_001347423.1,HGNC:HGNC:7,MIM:103950	alpha-2-macroglobulin			hsa04610	Complement and coagulation cascades
A4GALT	4.17378	2.59464	2.66893	3.0581	1.58327	0.728386	-0.940926	0.026664	GeneID:53947,Genbank:NM_001318038.2,HGNC:HGNC:18149,MIM:607922	alpha 1,4-galactosyltransferase (P blood group)			hsa00601,hsa00603	Glycosphingolipid biosynthesis - lacto and neolacto series|Glycosphingolipid biosynthesis - globo and isoglobo series
AAAS	4.95173	5.01509	5.03684	5.33913	4.60777	5.63917	0.153393	0.602518	GeneID:8086,Genbank:NM_001173466.1,HGNC:HGNC:13666,MIM:605378	aladin WD repeat nucleoporin	GO:0005634,GO:0005635,GO:0005643,GO:0005654,GO:0005813,GO:0005829,GO:0006110,GO:0006406,GO:0006409,GO:0006913,GO:0007077,GO:0007612,GO:0009566,GO:0016020,GO:0016032,GO:0016925,GO:0019083,GO:0031965,GO:0043657,GO:0046822,GO:0060964,GO:0075733,GO:1900034	nucleus|nuclear envelope|nuclear pore|nucleoplasm|centrosome|cytosol|regulation of glycolytic process|mRNA export from nucleus|tRNA export from nucleus|nucleocytoplasmic transport|mitotic nuclear envelope disassembly|learning|fertilization|membrane|viral process|protein sumoylation|viral transcription|nuclear membrane|host cell|regulation of nucleocytoplasmic transport|regulation of gene silencin…	hsa03013	RNA transport
AACS	3.33996	1.5803	2.77338	4.17058	0.929214	4.46136	0.144954	0.67971	GeneID:65985,Genbank:NM_023928.4,HGNC:HGNC:21298,MIM:614364	acetoacetyl-CoA synthetase	GO:0001889,GO:0005524,GO:0005829,GO:0006631,GO:0007584,GO:0014074,GO:0030729,GO:0032024,GO:0034201,GO:0042594,GO:0045471,GO:0046951,GO:0047760,GO:0050872,GO:0060612,GO:0071333,GO:0071394,GO:0071397	liver development|ATP binding|cytosol|fatty acid metabolic process|response to nutrient|response to purine-containing compound|acetoacetate-CoA ligase activity|positive regulation of insulin secretion|response to oleic acid|response to starvation|response to ethanol|ketone body biosynthetic process|butyrate-CoA ligase activity|white fat cell differentiation|adipose tissue development|cellular res…	hsa00280,hsa00650	Valine, leucine and isoleucine degradation|Butanoate metabolism
AADAC	4.40951	2.34316	1.6865	2.57671	0.607392	0.355729	-1.6663	0.00019459	GeneID:13,Genbank:XM_005247104.4,HGNC:HGNC:17,MIM:600338	arylacetamide deacetylase	GO:0003824,GO:0004806,GO:0005789,GO:0006805,GO:0009056,GO:0010898,GO:0016021,GO:0016298,GO:0017171,GO:0019213,GO:0031090	catalytic activity|triglyceride lipase activity|endoplasmic reticulum membrane|xenobiotic metabolic process|catabolic process|positive regulation of triglyceride catabolic process|integral component of membrane|lipase activity|serine hydrolase activity|deacetylase activity|organelle membrane
AADAT	0.739166	0.694569	0.941172	0.615996	0.867239	1.96036	0.376945	0.329228	GeneID:51166,Genbank:XM_006714231.2,HGNC:HGNC:17929,MIM:611754	aminoadipate aminotransferase	GO:0005759,GO:0006103,GO:0006536,GO:0006554,GO:0006569,GO:0009058,GO:0016212,GO:0019441,GO:0030170,GO:0033512,GO:0042803,GO:0047536,GO:0070189	mitochondrial matrix|2-oxoglutarate metabolic process|glutamate metabolic process|lysine catabolic process|tryptophan catabolic process|biosynthetic process|kynurenine-oxoglutarate transaminase activity|tryptophan catabolic process to kynurenine|pyridoxal phosphate binding|L-lysine catabolic process to acetyl-CoA via saccharopine|protein homodimerization activity|2-aminoadipate transaminase activ…	hsa00310,hsa00380	Lysine degradation|Tryptophan metabolism
AAED1	12.0922	9.9187	8.20722	9.42747	5.89755	7.183	-0.484375	0.086739	GeneID:195827,Genbank:XM_005251784.4,HGNC:HGNC:16881	AhpC/TSA antioxidant enzyme domain containing 1	GO:0016209,GO:0055114	antioxidant activity|oxidation-reduction process
AAGAB	3.86753	3.63828	3.14739	4.16779	3.53957	4.04188	0.0857476	0.754328	GeneID:79719,Genbank:NM_001271885.1,HGNC:HGNC:25662,MIM:614888	alpha and gamma adaptin binding protein	GO:0005737,GO:0005829,GO:0015031,GO:0016607	cytoplasm|cytosol|protein transport|nuclear speck
AAK1	2.62539	3.39371	3.24271	2.6597	2.17083	2.53437	-0.371333	0.182487	GeneID:22848,Genbank:NM_014911.3,HGNC:HGNC:19679,MIM:616405	AP2 associated kinase 1	GO:0004674,GO:0005112,GO:0005524,GO:0005737,GO:0005829,GO:0005905,GO:0006468,GO:0006897,GO:0019897,GO:0030136,GO:0031252,GO:0032880,GO:0035612,GO:0043195,GO:0045747,GO:0046777,GO:0050821,GO:0061024,GO:2000369	protein serine/threonine kinase activity|Notch binding|ATP binding|cytoplasm|cytosol|clathrin-coated pit|protein phosphorylation|endocytosis|extrinsic component of plasma membrane|clathrin-coated vesicle|cell leading edge|regulation of protein localization|AP-2 adaptor complex binding|terminal bouton|positive regulation of Notch signaling pathway|protein autophosphorylation|protein stabilization|…
AAMDC	1.2982	1.03163	1.29367	1.27482	0.866859	1.10424	-0.225476	0.539216	GeneID:28971,Genbank:NM_001316958.1,HGNC:HGNC:30205	adipogenesis associated Mth938 domain containing	GO:0005737,GO:0043066,GO:0045600,GO:0045944	cytoplasm|negative regulation of apoptotic process|positive regulation of fat cell differentiation|positive regulation of transcription from RNA polymerase II promoter
AAMP	11.2779	8.49037	7.93296	9.52071	10.9958	12.7597	0.338234	0.236354	GeneID:14,Genbank:XM_024452712.1,HGNC:HGNC:18,MIM:603488	angio associated migratory cell protein
AAR2	5.77405	3.95217	3.63162	4.86136	4.00685	4.70725	0.0990092	0.725985	GeneID:25980,Genbank:XM_006723770.3,HGNC:HGNC:15886,MIM:617365	AAR2 splicing factor homolog	GO:0000244,GO:0005681	spliceosomal tri-snRNP complex assembly|spliceosomal complex
AARD	0.554524	1.51817	0.878562	0.700049	1.65434	1.84767	0.489163	0.275204	GeneID:441376,Genbank:NM_001025357.2,HGNC:HGNC:33842	alanine and arginine rich domain containing protein	GO:0030324	lung development
AARS	10.7315	10.1235	8.43887	10.1553	16.4802	8.81552	0.244572	0.407554	GeneID:16,Genbank:NM_001605.2,HGNC:HGNC:20,MIM:601065	alanyl-tRNA synthetase	GO:0000049,GO:0002161,GO:0004813,GO:0005524,GO:0005737,GO:0005829,GO:0006400,GO:0006418,GO:0006419,GO:0008033,GO:0016020,GO:0016597,GO:0021680,GO:0043524,GO:0046872,GO:0050885,GO:0070062	tRNA binding|aminoacyl-tRNA editing activity|alanine-tRNA ligase activity|ATP binding|cytoplasm|cytosol|tRNA modification|tRNA aminoacylation for protein translation|alanyl-tRNA aminoacylation|tRNA processing|membrane|amino acid binding|cerebellar Purkinje cell layer development|negative regulation of neuron apoptotic process|metal ion binding|neuromuscular process controlling balance|extracellul…	hsa00970	Aminoacyl-tRNA biosynthesis
AARS2	1.87959	1.73304	1.70785	1.91186	3.00683	2.98111	0.536776	0.0621514	GeneID:57505,Genbank:XM_011514764.2,HGNC:HGNC:21022,MIM:612035	alanyl-tRNA synthetase 2, mitochondrial	GO:0000049,GO:0004813,GO:0005524,GO:0005739,GO:0006400,GO:0016597,GO:0033108,GO:0046872,GO:0070143	tRNA binding|alanine-tRNA ligase activity|ATP binding|mitochondrion|tRNA modification|amino acid binding|mitochondrial respiratory chain complex assembly|metal ion binding|mitochondrial alanyl-tRNA aminoacylation	hsa00970	Aminoacyl-tRNA biosynthesis
AARSD1	2.27316	1.7727	1.8036	2.36538	2.85839	2.21938	0.696572	0.859256	GeneID:80755,Genbank:NM_001261434.1,HGNC:HGNC:28417,MIM:613212	alanyl-tRNA synthetase domain containing 1	GO:0002196,GO:0003676,GO:0004813,GO:0005524,GO:0005634,GO:0005737,GO:0006419,GO:0046872	Ser-tRNA(Ala) hydrolase activity|nucleic acid binding|alanine-tRNA ligase activity|ATP binding|nucleus|cytoplasm|alanyl-tRNA aminoacylation|metal ion binding
AASDH	1.44123	1.34573	1.33125	1.09535	1.7654	2.04093	0.126084	0.704537	GeneID:132949,Genbank:XM_017007743.2,HGNC:HGNC:23993,MIM:614365	aminoadipate-semialdehyde dehydrogenase	GO:0005524,GO:0006631,GO:0016878,GO:0019482,GO:0043041	ATP binding|fatty acid metabolic process|acid-thiol ligase activity|beta-alanine metabolic process|amino acid activation for nonribosomal peptide biosynthetic process
AASDHPPT	4.49717	3.92516	3.58954	4.11933	5.16681	5.03372	0.152475	0.61901	GeneID:60496,Genbank:NM_015423.2,HGNC:HGNC:14235,MIM:607756	aminoadipate-semialdehyde dehydrogenase-phosphopantetheinyl transferase	GO:0000287,GO:0005829,GO:0008897,GO:0015939,GO:0019878,GO:0070062	magnesium ion binding|cytosol|holo-[acyl-carrier-protein] synthase activity|pantothenate metabolic process|lysine biosynthetic process via aminoadipic acid|extracellular exosome	hsa00770	Pantothenate and CoA biosynthesis
AASS	4.00982	4.93617	2.90845	3.43783	2.90701	2.42194	-0.488578	0.0777733	GeneID:10157,Genbank:NM_005763.3,HGNC:HGNC:17366,MIM:605113	aminoadipate-semialdehyde synthase	GO:0004753,GO:0005739,GO:0005759,GO:0006091,GO:0006554,GO:0019878,GO:0033512,GO:0043231,GO:0047130,GO:0047131,GO:0051262	saccharopine dehydrogenase activity|mitochondrion|mitochondrial matrix|generation of precursor metabolites and energy|lysine catabolic process|lysine biosynthetic process via aminoadipic acid|L-lysine catabolic process to acetyl-CoA via saccharopine|intracellular membrane-bounded organelle|saccharopine dehydrogenase (NADP+, L-lysine-forming) activity|saccharopine dehydrogenase (NAD+, L-glutamate-…	hsa00310	Lysine degradation
AATF	4.95614	5.24068	4.56902	5.56564	6.20011	6.27054	0.338747	0.207242	GeneID:26574,Genbank:NM_012138.3,HGNC:HGNC:19235,MIM:608463	apoptosis antagonizing transcription factor
AATK	5.9693	4.5515	3.82683	3.68932	1.31207	4.13905	-0.686962	0.075619	GeneID:9625,Genbank:NM_001080395.2,HGNC:HGNC:21,MIM:605276	apoptosis associated tyrosine kinase	GO:0004674,GO:0005524,GO:0016021,GO:0048471	protein serine/threonine kinase activity|ATP binding|integral component of membrane|perinuclear region of cytoplasm
ABAT	1.45418	1.69693	1.3892	1.78828	2.02509	1.02316	0.0377891	0.913327	GeneID:18,Genbank:NM_020686.5,HGNC:HGNC:23,MIM:137150	4-aminobutyrate aminotransferase			hsa00250,hsa00280,hsa00410,hsa00640,hsa00650,hsa04727	Alanine, aspartate and glutamate metabolism|Valine, leucine and isoleucine degradation|beta-Alanine metabolism|Propanoate metabolism|Butanoate metabolism|GABAergic synapse
ABCA1	13.4584	11.2497	10.0744	9.28942	3.67438	8.59678	-0.786194	0.0212658	GeneID:19,Genbank:NM_005502.3,HGNC:HGNC:29,MIM:600046	ATP binding cassette subfamily A member 1			hsa02010,hsa04975,hsa04979	ABC transporters|Fat digestion and absorption|Cholesterol metabolism
ABCA10	0.825767	0.917214	1.10724	0.820192	0.340751	0.308587	-1.14152	0.0101813	GeneID:10349,Genbank:NM_080282.3,HGNC:HGNC:30,MIM:612508	ATP binding cassette subfamily A member 10			hsa02010	ABC transporters
ABCA13	1.26705	0.0356948	0.163742	0.770341	1.44294	1.22888	2.56493	0.0432788	GeneID:154664,Genbank:XM_017011769.1,HGNC:HGNC:14638,MIM:607807	ATP binding cassette subfamily A member 13			hsa02010	ABC transporters
ABCA2	5.10723	5.02612	5.10042	4.04252	3.67716	8.06353	0.0488744	0.871819	GeneID:20,Genbank:NM_212533.2,HGNC:HGNC:32,MIM:600047	ATP binding cassette subfamily A member 2			hsa02010,hsa04142	ABC transporters|Lysosome
ABCA3	68.6446	52.9386	38.6952	45.3944	17.8171	12.9753	-1.21936	0.000462123	GeneID:21,Genbank:NM_001089.2,HGNC:HGNC:33,MIM:601615	ATP binding cassette subfamily A member 3			hsa02010	ABC transporters
ABCA4	0.0421869	0.214742	0.194746	0.329251	0.925955	3.27055	3.10791	1.36611e-13	GeneID:24,Genbank:NM_000350.2,HGNC:HGNC:34,MIM:601691	ATP binding cassette subfamily A member 4			hsa02010	ABC transporters
ABCA5	2.32438	1.98538	2.17244	1.61284	2.86427	1.7711	-0.141353	0.678568	GeneID:23461,Genbank:NM_172232.3,HGNC:HGNC:35,MIM:612503	ATP binding cassette subfamily A member 5			hsa02010	ABC transporters
ABCA6	3.87923	3.74695	3.67989	3.50573	1.11759	1.06156	-1.25967	0.00134843	GeneID:23460,Genbank:XM_017024404.2,HGNC:HGNC:36,MIM:612504	ATP binding cassette subfamily A member 6			hsa02010	ABC transporters
ABCA7	2.5833	3.09355	2.89263	4.70339	2.69968	3.43344	0.319804	0.380314	GeneID:10347,Genbank:NM_019112.3,HGNC:HGNC:37,MIM:605414	ATP binding cassette subfamily A member 7			hsa02010	ABC transporters
ABCA8	9.36312	7.27172	7.7918	7.37294	1.86844	1.55385	-1.62219	0.000103261	GeneID:10351,Genbank:XM_005256940.4,HGNC:HGNC:38,MIM:612505	ATP binding cassette subfamily A member 8			hsa02010	ABC transporters
ABCA9	1.27754	1.32022	1.62182	1.02044	0.336485	0.37881	-1.59543	0.000326175	GeneID:10350,Genbank:XM_017024011.1,HGNC:HGNC:39,MIM:612507	ATP binding cassette subfamily A member 9			hsa02010	ABC transporters
ABCB1	0.791249	0.794304	1.84225	1.22881	0.282397	0.881556	-0.732386	0.113212	GeneID:5243,Genbank:NM_001348944.1,HGNC:HGNC:40,MIM:171050	ATP binding cassette subfamily B member 1			hsa02010,hsa04976,hsa05206,hsa05226	ABC transporters|Bile secretion|MicroRNAs in cancer|Gastric cancer
ABCB10	3.748	3.46608	3.16989	3.22901	3.90223	5.06691	0.187826	0.541373	GeneID:23456,Genbank:NM_012089.2,HGNC:HGNC:41,MIM:605454	ATP binding cassette subfamily B member 10			hsa02010	ABC transporters
ABCB6	1.50388	1.43734	1.21938	1.37863	3.60373	6.34985	1.15241	0.00858469	GeneID:10058,Genbank:NM_001349828.1,HGNC:HGNC:47,MIM:605452	ATP binding cassette subfamily B member 6 (Langereis blood group)			hsa02010	ABC transporters
ABCB7	3.82788	3.61736	3.74926	3.78989	5.89324	5.22217	0.373151	0.216847	GeneID:22,Genbank:NM_001271698.2,HGNC:HGNC:48,MIM:300135	ATP binding cassette subfamily B member 7			hsa02010	ABC transporters
ABCB8	2.82847	2.43717	2.50969	2.71193	2.94053	6.33965	0.569939	0.0754634	GeneID:11194,Genbank:NM_001282291.1,HGNC:HGNC:49,MIM:605464	ATP binding cassette subfamily B member 8			hsa02010	ABC transporters
ABCC1	8.45882	7.51631	7.9205	7.27068	6.63794	6.65036	-0.199893	0.436636	GeneID:4363,Genbank:NM_004996.3,HGNC:HGNC:51,MIM:158343	ATP binding cassette subfamily C member 1			hsa01523,hsa02010,hsa04071,hsa04977,hsa05206	Antifolate resistance|ABC transporters|Sphingolipid signaling pathway|Vitamin digestion and absorption|MicroRNAs in cancer
ABCC10	2.14592	2.19807	2.20352	2.04081	3.44205	3.69898	0.412054	0.154597	GeneID:89845,Genbank:XM_017011446.2,HGNC:HGNC:52,MIM:612509	ATP binding cassette subfamily C member 10			hsa02010	ABC transporters
ABCC3	3.91192	3.14133	7.24507	16.0993	30.469	51.7743	2.79497	1.2721e-17	GeneID:8714,Genbank:XM_011525423.1,HGNC:HGNC:54,MIM:604323	ATP binding cassette subfamily C member 3			hsa01523,hsa02010,hsa04976	Antifolate resistance|ABC transporters|Bile secretion
ABCC4	5.88251	3.52274	5.23565	4.003	3.78846	2.21319	-0.620006	0.072253	GeneID:10257,Genbank:NM_001301829.1,HGNC:HGNC:55,MIM:605250	ATP binding cassette subfamily C member 4			hsa01523,hsa02010,hsa04024,hsa04976	Antifolate resistance|ABC transporters|cAMP signaling pathway|Bile secretion
ABCC5	1.92081	2.65171	2.69563	1.74868	1.84093	5.05344	0.082703	0.807766	GeneID:10057,Genbank:NM_005688.3,HGNC:HGNC:56,MIM:605251	ATP binding cassette subfamily C member 5			hsa01523,hsa02010	Antifolate resistance|ABC transporters
ABCC6	1.99633	1.61463	2.60455	1.38988	5.72862	3.69144	0.616059	0.165351	GeneID:368,Genbank:XM_024450261.1,HGNC:HGNC:57,MIM:603234	ATP binding cassette subfamily C member 6			hsa02010	ABC transporters
ABCC9	3.72479	3.85942	4.27219	2.78177	0.933348	1.06809	-1.56169	4.64988e-05	GeneID:10060,Genbank:XM_005253290.4,HGNC:HGNC:60,MIM:601439	ATP binding cassette subfamily C member 9			hsa02010	ABC transporters
ABCD1	3.01489	3.71582	2.7088	2.96294	3.41446	2.99739	0.0456823	0.872881	GeneID:215,Genbank:NM_000033.3,HGNC:HGNC:61,MIM:300371	ATP binding cassette subfamily D member 1			hsa02010,hsa04146	ABC transporters|Peroxisome
ABCD3	9.50893	7.82717	7.56914	10.4438	22.6824	19.997	0.988356	0.00746642	GeneID:5825,Genbank:XM_006710802.2,HGNC:HGNC:67,MIM:170995	ATP binding cassette subfamily D member 3			hsa02010,hsa04146	ABC transporters|Peroxisome
ABCD4	3.11487	3.04836	3.64773	3.1026	3.72594	3.56414	0.0914604	0.748774	GeneID:5826,Genbank:NM_001353607.1,HGNC:HGNC:68,MIM:603214	ATP binding cassette subfamily D member 4			hsa02010,hsa04146	ABC transporters|Peroxisome
ABCE1	8.8527	7.42904	6.68055	7.47866	8.10613	9.58207	0.0808712	0.79148	GeneID:6059,Genbank:NM_002940.2,HGNC:HGNC:69,MIM:601213	ATP binding cassette subfamily E member 1
ABCF1	7.15292	6.8655	5.0828	5.86108	11.0575	10.7491	0.499953	0.123243	GeneID:23,Genbank:NM_001025091.1,HGNC:HGNC:70,MIM:603429	ATP binding cassette subfamily F member 1	GO:0005524,GO:0005635,GO:0005654,GO:0005737,GO:0005829,GO:0006413,GO:0008494,GO:0016887,GO:0042788,GO:0043022,GO:0045727	ATP binding|nuclear envelope|nucleoplasm|cytoplasm|cytosol|translational initiation|translation activator activity|ATPase activity|polysomal ribosome|ribosome binding|positive regulation of translation
ABCF2	2.92327	2.69594	2.08426	2.83942	3.4901	4.599	0.539229	0.0961787	GeneID:10061,Genbank:NM_005692.4,HGNC:HGNC:71,MIM:612510	ATP binding cassette subfamily F member 2
ABCF3	6.26467	6.02015	4.65463	5.64648	5.03985	4.97262	-0.0972936	0.712848	GeneID:55324,Genbank:NM_001351300.1,HGNC:HGNC:72	ATP binding cassette subfamily F member 3	GO:0005524,GO:0016020,GO:0016887,GO:0045296,GO:0051607	ATP binding|membrane|ATPase activity|cadherin binding|defense response to virus
ABCG1	6.46867	4.20737	4.44583	5.72128	1.38064	2.77883	-0.792187	0.0244279	GeneID:9619,Genbank:NM_207627.1,HGNC:HGNC:73,MIM:603076	ATP binding cassette subfamily G member 1			hsa02010	ABC transporters
ABCG2	1.63615	0.913547	1.86957	1.58757	0.423794	0.658484	-0.993162	0.0147448	GeneID:9429,Genbank:NM_001257386.2,HGNC:HGNC:74,MIM:603756	ATP binding cassette subfamily G member 2 (Junior blood group)			hsa01523,hsa02010,hsa04976	Antifolate resistance|ABC transporters|Bile secretion
ABHD10	4.35329	4.98669	4.35793	4.51063	3.66094	5.42198	-0.0986899	0.758237	GeneID:55347,Genbank:NM_001272069.1,HGNC:HGNC:25656	abhydrolase domain containing 10	GO:0004553,GO:0005739,GO:0005759,GO:0005829,GO:0019391,GO:0052695,GO:0102390	hydrolase activity, hydrolyzing O-glycosyl compounds|mitochondrion|mitochondrial matrix|cytosol|glucuronoside catabolic process|cellular glucuronidation|mycophenolic acid acyl-glucuronide esterase activity
ABHD11	2.57294	1.72716	2.30784	2.76429	4.77566	4.91517	0.935485	0.0094559	GeneID:83451,Genbank:NM_148913.3,HGNC:HGNC:16407	abhydrolase domain containing 11	GO:0005739,GO:0016787	mitochondrion|hydrolase activity
ABHD12	4.9163	5.11506	4.3793	5.52861	3.48592	3.51596	-0.231593	0.453519	GeneID:26090,Genbank:NM_015600.4,HGNC:HGNC:15868,MIM:613599	abhydrolase domain containing 12	GO:0002084,GO:0004622,GO:0005886,GO:0006660,GO:0007628,GO:0008474,GO:0010996,GO:0016021,GO:0032281,GO:0032839,GO:0046464,GO:0046475,GO:0047372,GO:0052651	protein depalmitoylation|lysophospholipase activity|plasma membrane|phosphatidylserine catabolic process|adult walking behavior|palmitoyl-(protein) hydrolase activity|response to auditory stimulus|integral component of membrane|AMPA glutamate receptor complex|dendrite cytoplasm|acylglycerol catabolic process|glycerophospholipid catabolic process|acylglycerol lipase activity|monoacylglycerol catab…
ABHD13	3.90386	4.10885	3.3092	3.00122	2.7535	2.4158	-0.547104	0.0409332	GeneID:84945,Genbank:NM_032859.2,HGNC:HGNC:20293	abhydrolase domain containing 13	GO:0002084,GO:0008474,GO:0016020,GO:0016021,GO:0032839	protein depalmitoylation|palmitoyl-(protein) hydrolase activity|membrane|integral component of membrane|dendrite cytoplasm
ABHD14A	5.2566	4.04565	4.548	4.73809	8.21911	8.11237	0.638179	0.125129	GeneID:25864,Genbank:NM_015407.4,HGNC:HGNC:24538	abhydrolase domain containing 14A	GO:0005737,GO:0016021,GO:0016787,GO:0070062	cytoplasm|integral component of membrane|hydrolase activity|extracellular exosome
ABHD14B	7.86617	7.38357	7.33707	6.00077	9.68402	8.20284	0.108347	0.713636	GeneID:84836,Genbank:NM_001254753.1,HGNC:HGNC:28235	abhydrolase domain containing 14B	GO:0005634,GO:0005730,GO:0005829,GO:0016787,GO:0045944,GO:0050427,GO:0070062	nucleus|nucleolus|cytosol|hydrolase activity|positive regulation of transcription from RNA polymerase II promoter|3'-phosphoadenosine 5'-phosphosulfate metabolic process|extracellular exosome
ABHD15	3.90375	3.77121	3.91543	3.55573	3.87832	4.35289	0.0313556	0.911044	GeneID:116236,Genbank:NM_198147.2,HGNC:HGNC:26971	abhydrolase domain containing 15	GO:0005576,GO:0016020,GO:0016788,GO:0044255	extracellular region|membrane|hydrolase activity, acting on ester bonds|cellular lipid metabolic process
ABHD16A	7.17695	7.8633	5.60819	6.48035	10.7727	9.57539	0.316021	0.247797	GeneID:7920,Genbank:NM_021160.2,HGNC:HGNC:13921,MIM:142620	abhydrolase domain containing 16A	GO:0016021,GO:0047372,GO:0052651,GO:1905344	integral component of membrane|acylglycerol lipase activity|monoacylglycerol catabolic process|prostaglandin catabolic process
ABHD17A	10.2737	9.59564	7.32133	8.96065	4.19363	6.06064	-0.50784	0.121521	GeneID:81926,Genbank:NM_001130111.1,HGNC:HGNC:28756	abhydrolase domain containing 17A	GO:0002084,GO:0005576,GO:0005886,GO:0008474,GO:0010008,GO:0014069,GO:0016020,GO:0018345,GO:0055038,GO:0072657,GO:1902817,GO:1905668	protein depalmitoylation|extracellular region|plasma membrane|palmitoyl-(protein) hydrolase activity|endosome membrane|postsynaptic density|membrane|protein palmitoylation|recycling endosome membrane|protein localization to membrane|negative regulation of protein localization to microtubule|positive regulation of protein localization to endosome	hsa00062	Fatty acid elongation
ABHD17B	3.60368	2.53656	2.96206	2.73803	2.55413	5.80859	0.197612	0.59389	GeneID:51104,Genbank:NM_016014.3,HGNC:HGNC:24278	abhydrolase domain containing 17B	GO:0002084,GO:0005576,GO:0005886,GO:0008474,GO:0014069,GO:0016020,GO:0018345,GO:0055038,GO:1902473,GO:1902817,GO:1902950,GO:1905668	protein depalmitoylation|extracellular region|plasma membrane|palmitoyl-(protein) hydrolase activity|postsynaptic density|membrane|protein palmitoylation|recycling endosome membrane|regulation of protein localization to synapse|negative regulation of protein localization to microtubule|regulation of dendritic spine maintenance|positive regulation of protein localization to endosome	hsa00062	Fatty acid elongation
ABHD17C	10.5722	10.9354	12.0652	15.7874	14.3124	24.477	0.666104	0.0189818	GeneID:58489,Genbank:NM_021214.1,HGNC:HGNC:26925	abhydrolase domain containing 17C	GO:0002084,GO:0008474,GO:0014069,GO:0018345,GO:1902817,GO:1905668	protein depalmitoylation|palmitoyl-(protein) hydrolase activity|postsynaptic density|protein palmitoylation|negative regulation of protein localization to microtubule|positive regulation of protein localization to endosome	hsa00062	Fatty acid elongation
ABHD18	1.05198	1.2483	1.22293	1.08105	1.32424	1.38318	0.150581	0.587437	GeneID:80167,Genbank:NM_001358454.1,HGNC:HGNC:26111	abhydrolase domain containing 18	GO:0005576	extracellular region
ABHD2	32.9373	23.3071	29.8531	33.7267	32.07	26.1742	0.0892397	0.751483	GeneID:11057,Genbank:NM_007011.7,HGNC:HGNC:18717,MIM:612196	abhydrolase domain containing 2	GO:0001669,GO:0003707,GO:0007340,GO:0009611,GO:0016021,GO:0030336,GO:0032570,GO:0036126,GO:0042562,GO:0043401,GO:0046464,GO:0047372,GO:0048240,GO:0097524	acrosomal vesicle|steroid hormone receptor activity|acrosome reaction|response to wounding|integral component of membrane|negative regulation of cell migration|response to progesterone|sperm flagellum|hormone binding|steroid hormone mediated signaling pathway|acylglycerol catabolic process|acylglycerol lipase activity|sperm capacitation|sperm plasma membrane
ABHD3	3.61198	3.77001	2.79263	3.48938	4.51428	4.48935	0.297209	0.329994	GeneID:171586,Genbank:NM_001308256.1,HGNC:HGNC:18718,MIM:612197	abhydrolase domain containing 3	GO:0004623,GO:0005886,GO:0006656,GO:0008970,GO:0016021,GO:0046470,GO:0052739,GO:0052740,GO:0102567,GO:0102568	phospholipase A2 activity|plasma membrane|phosphatidylcholine biosynthetic process|phosphatidylcholine 1-acylhydrolase activity|integral component of membrane|phosphatidylcholine metabolic process|phosphatidylserine 1-acylhydrolase activity|1-acyl-2-lysophosphatidylserine acylhydrolase activity|phospholipase A2 activity (consuming 1,2-dipalmitoylphosphatidylcholine)|phospholipase A2 activity cons…
ABHD4	3.88182	4.26718	3.82139	3.66203	4.61433	6.349	0.318755	0.277455	GeneID:63874,Genbank:NM_022060.2,HGNC:HGNC:20154	abhydrolase domain containing 4	GO:0005789,GO:0016042,GO:0016787,GO:0036152	endoplasmic reticulum membrane|lipid catabolic process|hydrolase activity|phosphatidylethanolamine acyl-chain remodeling
ABHD5	5.84827	5.83175	4.44311	5.93063	3.95078	4.44924	-0.293115	0.295793	GeneID:51099,Genbank:NM_001355186.1,HGNC:HGNC:21396,MIM:604780	abhydrolase domain containing 5	GO:0003841,GO:0005811,GO:0005829,GO:0006631,GO:0006654,GO:0010891,GO:0010898,GO:0030154,GO:0042171,GO:0051006	1-acylglycerol-3-phosphate O-acyltransferase activity|lipid droplet|cytosol|fatty acid metabolic process|phosphatidic acid biosynthetic process|negative regulation of sequestering of triglyceride|positive regulation of triglyceride catabolic process|cell differentiation|lysophosphatidic acid acyltransferase activity|positive regulation of lipoprotein lipase activity	hsa04923	Regulation of lipolysis in adipocytes
ABHD6	2.99611	3.28951	2.40822	2.86738	1.48155	1.49683	-0.713619	0.0546401	GeneID:57406,Genbank:NM_001320126.1,HGNC:HGNC:21398,MIM:616966	abhydrolase domain containing 6	GO:0004620,GO:0005739,GO:0005886,GO:0009395,GO:0016021,GO:0030336,GO:0032281,GO:0046464,GO:0046889,GO:0047372,GO:0060292,GO:0070062,GO:2000124	phospholipase activity|mitochondrion|plasma membrane|phospholipid catabolic process|integral component of membrane|negative regulation of cell migration|AMPA glutamate receptor complex|acylglycerol catabolic process|positive regulation of lipid biosynthetic process|acylglycerol lipase activity|long term synaptic depression|extracellular exosome|regulation of endocannabinoid signaling pathway	hsa04723	Retrograde endocannabinoid signaling
ABHD8	5.05762	4.0617	3.70391	3.92006	1.90264	5.40667	-0.230174	0.552856	GeneID:79575,Genbank:NM_024527.4,HGNC:HGNC:23759	abhydrolase domain containing 8	GO:0016787,GO:0070062	hydrolase activity|extracellular exosome
ABI1	6.88856	7.45118	5.88145	6.3252	6.15349	5.45025	-0.150474	0.550385	GeneID:10006,Genbank:NM_001178125.1,HGNC:HGNC:11320,MIM:603050	abl interactor 1	GO:0001756,GO:0005622,GO:0005634,GO:0005856,GO:0008154,GO:0014069,GO:0017124,GO:0018108,GO:0030027,GO:0030054,GO:0030175,GO:0030296,GO:0030426,GO:0031209,GO:0031252,GO:0032403,GO:0035855,GO:0043005,GO:0045211,GO:0045296,GO:0048813,GO:0072673	somitogenesis|intracellular|nucleus|cytoskeleton|actin polymerization or depolymerization|postsynaptic density|SH3 domain binding|peptidyl-tyrosine phosphorylation|lamellipodium|cell junction|filopodium|protein tyrosine kinase activator activity|growth cone|SCAR complex|cell leading edge|protein complex binding|megakaryocyte development|neuron projection|postsynaptic membrane|cadherin binding|den…
ABI2	8.06524	6.60699	6.2956	5.64144	5.41195	3.58387	-0.560788	0.0417235	GeneID:10152,Genbank:XM_024452511.1,HGNC:HGNC:24011,MIM:606442	abl interactor 2	GO:0003677,GO:0005737,GO:0005829,GO:0005856,GO:0006928,GO:0007010,GO:0008093,GO:0008154,GO:0016032,GO:0016477,GO:0016601,GO:0017124,GO:0018108,GO:0019900,GO:0030027,GO:0030175,GO:0031209,GO:0031625,GO:0032403,GO:0070064,GO:2000601	DNA binding|cytoplasm|cytosol|cytoskeleton|movement of cell or subcellular component|cytoskeleton organization|cytoskeletal adaptor activity|actin polymerization or depolymerization|viral process|cell migration|Rac protein signal transduction|SH3 domain binding|peptidyl-tyrosine phosphorylation|kinase binding|lamellipodium|filopodium|SCAR complex|ubiquitin protein ligase binding|protein complex b…	hsa04810	Regulation of actin cytoskeleton
ABI3	3.80345	7.16105	3.87975	5.17168	2.08709	2.13904	-0.772275	0.0943183	GeneID:51225,Genbank:NM_016428.2,HGNC:HGNC:29859,MIM:606363	ABI family member 3	GO:0005622,GO:0005737,GO:0006928,GO:0016020,GO:0030027,GO:0030334,GO:0042802	intracellular|cytoplasm|movement of cell or subcellular component|membrane|lamellipodium|regulation of cell migration|identical protein binding
ABI3BP	8.82577	7.30173	6.65933	5.83646	2.06016	1.70545	-1.46873	0.000136883	GeneID:25890,Genbank:XM_024453445.1,HGNC:HGNC:17265,MIM:606279	ABI family member 3 binding protein	GO:0005518,GO:0005576,GO:0005614,GO:0005615,GO:0008201,GO:0010811,GO:0030198,GO:0031012	collagen binding|extracellular region|interstitial matrix|extracellular space|heparin binding|positive regulation of cell-substrate adhesion|extracellular matrix organization|extracellular matrix
ABL1	8.70982	8.26529	8.52193	6.82419	6.84765	10.4053	-0.0566498	0.828397	GeneID:25,Genbank:NM_007313.2,HGNC:HGNC:76,MIM:189980	ABL proto-oncogene 1, non-receptor tyrosine kinase			hsa04012,hsa04014,hsa04110,hsa04360,hsa04722,hsa05130,hsa05131,hsa05200,hsa05206,hsa05220,hsa05416	ErbB signaling pathway|Ras signaling pathway|Cell cycle|Axon guidance|Neurotrophin signaling pathway|Pathogenic Escherichia coli infection|Shigellosis|Pathways in cancer|MicroRNAs in cancer|Chronic myeloid leukemia|Viral myocarditis
ABL2	2.79999	2.9678	2.7366	2.58993	3.33755	5.41597	0.317449	0.317485	GeneID:27,Genbank:NM_001168238.1,HGNC:HGNC:77,MIM:164690	ABL proto-oncogene 2, non-receptor tyrosine kinase			hsa04012,hsa04014,hsa05416	ErbB signaling pathway|Ras signaling pathway|Viral myocarditis
ABLIM1	13.7778	13.5419	9.83879	10.3622	6.25761	7.82754	-0.633574	0.0263441	GeneID:3983,Genbank:NM_001322885.2,HGNC:HGNC:78,MIM:602330	actin binding LIM protein 1	GO:0001725,GO:0003779,GO:0005737,GO:0007010,GO:0007601,GO:0009887,GO:0015629,GO:0030027,GO:0030032,GO:0046872,GO:0060271	stress fiber|actin binding|cytoplasm|cytoskeleton organization|visual perception|animal organ morphogenesis|actin cytoskeleton|lamellipodium|lamellipodium assembly|metal ion binding|cilium assembly	hsa04360	Axon guidance
ABLIM3	2.60407	2.64363	2.57925	2.22724	1.83276	1.12844	-0.650512	0.0539674	GeneID:22885,Genbank:NM_001301027.2,HGNC:HGNC:29132,MIM:611305	actin binding LIM protein family member 3	GO:0001725,GO:0003779,GO:0005737,GO:0006351,GO:0030027,GO:0030032,GO:0030036,GO:0045944,GO:0046872,GO:0060271,GO:1903955	stress fiber|actin binding|cytoplasm|transcription, DNA-templated|lamellipodium|lamellipodium assembly|actin cytoskeleton organization|positive regulation of transcription from RNA polymerase II promoter|metal ion binding|cilium assembly|positive regulation of protein targeting to mitochondrion	hsa04360	Axon guidance
ABO	3.86178	1.8096	1.03533	2.66442	4.13342	1.70237	0.443047	0.243651	GeneID:28,Genbank:NM_020469.2,HGNC:HGNC:79,MIM:110300	ABO, alpha 1-3-N-acetylgalactosaminyltransferase and alpha 1-3-galactosyltransferase			hsa00601	Glycosphingolipid biosynthesis - lacto and neolacto series
ABR	6.4829	6.98666	5.73667	6.70596	3.63204	7.11883	-0.14099	0.674548	GeneID:29,Genbank:NM_001322841.1,HGNC:HGNC:81,MIM:600365	ABR, RhoGEF and GTPase activating protein	GO:0002692,GO:0005085,GO:0005089,GO:0005096,GO:0005829,GO:0005886,GO:0007186,GO:0007264,GO:0007420,GO:0016020,GO:0030036,GO:0032496,GO:0035023,GO:0042472,GO:0043065,GO:0043114,GO:0043314,GO:0043547,GO:0050728,GO:0050766,GO:0050885,GO:0051056,GO:0060313	negative regulation of cellular extravasation|guanyl-nucleotide exchange factor activity|Rho guanyl-nucleotide exchange factor activity|GTPase activator activity|cytosol|plasma membrane|G-protein coupled receptor signaling pathway|small GTPase mediated signal transduction|brain development|membrane|actin cytoskeleton organization|response to lipopolysaccharide|regulation of Rho protein signal tra…
ABRACL	5.98248	4.55772	4.11476	5.37823	4.48773	2.47497	-0.209399	0.549955	GeneID:58527,Genbank:NM_021243.2,HGNC:HGNC:21230	ABRA C-terminal like
ABRAXAS1	2.90973	2.56596	2.8251	2.67136	3.31535	3.48104	0.103439	0.733271	GeneID:84142,Genbank:NM_001345962.1,HGNC:HGNC:25829,MIM:611143	abraxas 1, BRCA1 A complex subunit	GO:0005634,GO:0005654,GO:0006302,GO:0006303,GO:0010212,GO:0016569,GO:0016579,GO:0016604,GO:0031593,GO:0045739,GO:0070531,GO:0072425	nucleus|nucleoplasm|double-strand break repair|double-strand break repair via nonhomologous end joining|response to ionizing radiation|covalent chromatin modification|protein deubiquitination|nuclear body|polyubiquitin modification-dependent protein binding|positive regulation of DNA repair|BRCA1-A complex|signal transduction involved in G2 DNA damage checkpoint	hsa03440	Homologous recombination
ABRAXAS2	4.71675	4.75626	4.12191	4.28504	3.51665	4.26176	-0.209132	0.47054	GeneID:23172,Genbank:NM_032182.3,HGNC:HGNC:28975,MIM:611144	abraxas 2, BRISC complex subunit	GO:0000278,GO:0000922,GO:0002931,GO:0005737,GO:0005829,GO:0005874,GO:0007059,GO:0008017,GO:0008608,GO:0016579,GO:0031593,GO:0051301,GO:0070536,GO:0070552,GO:0090307	mitotic cell cycle|spindle pole|response to ischemia|cytoplasm|cytosol|microtubule|chromosome segregation|microtubule binding|attachment of spindle microtubules to kinetochore|protein deubiquitination|polyubiquitin modification-dependent protein binding|cell division|protein K63-linked deubiquitination|BRISC complex|mitotic spindle assembly
ABT1	5.75879	5.35899	4.64445	5.45019	6.55864	7.32678	0.289197	0.34326	GeneID:29777,Genbank:NM_013375.3,HGNC:HGNC:17369	activator of basal transcription 1	GO:0000447,GO:0000472,GO:0000480,GO:0003677,GO:0003713,GO:0003723,GO:0005634,GO:0005667,GO:0005730,GO:0006357,GO:0006366,GO:0021522,GO:0034462	endonucleolytic cleavage in ITS1 to separate SSU-rRNA from 5.8S rRNA and LSU-rRNA from tricistronic rRNA transcript (SSU-rRNA, 5.8S rRNA, LSU-rRNA)|endonucleolytic cleavage to generate mature 5'-end of SSU-rRNA from (SSU-rRNA, 5.8S rRNA, LSU-rRNA)|endonucleolytic cleavage in 5'-ETS of tricistronic rRNA transcript (SSU-rRNA, 5.8S rRNA, LSU-rRNA)|DNA binding|transcription coactivator activity|RNA b…
ABTB1	12.8326	6.68428	7.76009	11.2421	2.36538	6.45648	-0.610705	0.112663	GeneID:80325,Genbank:XM_017007288.1,HGNC:HGNC:18275,MIM:608308	ankyrin repeat and BTB domain containing 1	GO:0003746,GO:0005730,GO:0005737,GO:0005829,GO:0005886,GO:0019005,GO:0030162,GO:0031625,GO:0042787,GO:0043161	translation elongation factor activity|nucleolus|cytoplasm|cytosol|plasma membrane|SCF ubiquitin ligase complex|regulation of proteolysis|ubiquitin protein ligase binding|protein ubiquitination involved in ubiquitin-dependent protein catabolic process|proteasome-mediated ubiquitin-dependent protein catabolic process
ABTB2	0.828144	0.968765	0.546003	1.19794	0.884464	0.780868	0.393872	0.274851	GeneID:25841,Genbank:NM_145804.2,HGNC:HGNC:23842	ankyrin repeat and BTB domain containing 2	GO:0005634,GO:0005654,GO:0005737,GO:0019005,GO:0030162,GO:0031625,GO:0042787,GO:0043161,GO:0046982,GO:0097237	nucleus|nucleoplasm|cytoplasm|SCF ubiquitin ligase complex|regulation of proteolysis|ubiquitin protein ligase binding|protein ubiquitination involved in ubiquitin-dependent protein catabolic process|proteasome-mediated ubiquitin-dependent protein catabolic process|protein heterodimerization activity|cellular response to toxic substance
ACAA1	10.1606	9.0613	8.35397	12.4036	8.10078	13.6316	0.339482	0.239665	GeneID:30,Genbank:NM_001130410.1,HGNC:HGNC:82,MIM:604054	acetyl-CoA acyltransferase 1	GO:0000038,GO:0003988,GO:0005576,GO:0005777,GO:0005782,GO:0006635,GO:0008206,GO:0008775,GO:0016020,GO:0016401,GO:0033540,GO:0035580,GO:0036109,GO:0043231,GO:0043312	very long-chain fatty acid metabolic process|acetyl-CoA C-acyltransferase activity|extracellular region|peroxisome|peroxisomal matrix|fatty acid beta-oxidation|bile acid metabolic process|acetate CoA-transferase activity|membrane|palmitoyl-CoA oxidase activity|fatty acid beta-oxidation using acyl-CoA oxidase|specific granule lumen|alpha-linolenic acid metabolic process|intracellular membrane-boun…	hsa00071,hsa00280,hsa00592,hsa01040,hsa03320,hsa04146	Fatty acid degradation|Valine, leucine and isoleucine degradation|alpha-Linolenic acid metabolism|Biosynthesis of unsaturated fatty acids|PPAR signaling pathway|Peroxisome
ACAA2	13.2372	9.61912	10.5161	13.2346	6.81706	17.116	0.0455897	0.890203	GeneID:10449,Genbank:NM_006111.2,HGNC:HGNC:83,MIM:604770	acetyl-CoA acyltransferase 2	GO:0003723,GO:0003988,GO:0005739,GO:0005743,GO:0005759,GO:0006635,GO:0006695,GO:0070062,GO:0071456,GO:1901029,GO:1902109	RNA binding|acetyl-CoA C-acyltransferase activity|mitochondrion|mitochondrial inner membrane|mitochondrial matrix|fatty acid beta-oxidation|cholesterol biosynthetic process|extracellular exosome|cellular response to hypoxia|negative regulation of mitochondrial outer membrane permeabilization involved in apoptotic signaling pathway|negative regulation of mitochondrial membrane permeability involve…	hsa00062,hsa00071,hsa00280	Fatty acid elongation|Fatty acid degradation|Valine, leucine and isoleucine degradation
ACACA	5.30182	4.88698	5.485	4.78097	10.0036	10.0792	0.612532	0.0673904	GeneID:31,Genbank:XM_011524701.1,HGNC:HGNC:84,MIM:200350	acetyl-CoA carboxylase alpha			hsa00061,hsa00620,hsa00640,hsa04152,hsa04910,hsa04922	Fatty acid biosynthesis|Pyruvate metabolism|Propanoate metabolism|AMPK signaling pathway|Insulin signaling pathway|Glucagon signaling pathway
ACACB	3.51235	2.74343	3.07906	3.07678	1.20172	1.27076	-0.845194	0.0195686	GeneID:32,Genbank:XM_011538265.2,HGNC:HGNC:85,MIM:601557	acetyl-CoA carboxylase beta	GO:0003989,GO:0004075,GO:0005524,GO:0005634,GO:0005739,GO:0005741,GO:0005829,GO:0006084,GO:0006633,GO:0006768,GO:0006853,GO:0009374,GO:0010629,GO:0010884,GO:0010906,GO:0012505,GO:0014070,GO:0031325,GO:0031667,GO:0031999,GO:0042493,GO:0042802,GO:0043086,GO:0045540,GO:0046872,GO:0051289,GO:0060421,GO:0097009,GO:2001295	acetyl-CoA carboxylase activity|biotin carboxylase activity|ATP binding|nucleus|mitochondrion|mitochondrial outer membrane|cytosol|acetyl-CoA metabolic process|fatty acid biosynthetic process|biotin metabolic process|carnitine shuttle|biotin binding|negative regulation of gene expression|positive regulation of lipid storage|regulation of glucose metabolic process|endomembrane system|response to o…	hsa00061,hsa00620,hsa00640,hsa04152,hsa04910,hsa04920,hsa04922,hsa04931	Fatty acid biosynthesis|Pyruvate metabolism|Propanoate metabolism|AMPK signaling pathway|Insulin signaling pathway|Adipocytokine signaling pathway|Glucagon signaling pathway|Insulin resistance
ACAD10	2.89948	2.38463	2.88679	2.37283	2.66782	2.50642	-0.0948779	0.744851	GeneID:80724,Genbank:NM_001136538.1,HGNC:HGNC:21597,MIM:611181	acyl-CoA dehydrogenase family member 10	GO:0003995,GO:0005739,GO:0005759,GO:0006635,GO:0016787,GO:0033539,GO:0050660	acyl-CoA dehydrogenase activity|mitochondrion|mitochondrial matrix|fatty acid beta-oxidation|hydrolase activity|fatty acid beta-oxidation using acyl-CoA dehydrogenase|flavin adenine dinucleotide binding
ACAD11	3.81648	2.71259	3.53903	4.60159	1.50008	2.45434	-0.343046	0.309287	GeneID:84129,Genbank:NM_032169.4,HGNC:HGNC:30211,MIM:614288	acyl-CoA dehydrogenase family member 11	GO:0003995,GO:0004466,GO:0005634,GO:0005743,GO:0005777,GO:0006635,GO:0017099,GO:0031966,GO:0033539,GO:0050660,GO:0070991	acyl-CoA dehydrogenase activity|long-chain-acyl-CoA dehydrogenase activity|nucleus|mitochondrial inner membrane|peroxisome|fatty acid beta-oxidation|very-long-chain-acyl-CoA dehydrogenase activity|mitochondrial membrane|fatty acid beta-oxidation using acyl-CoA dehydrogenase|flavin adenine dinucleotide binding|medium-chain-acyl-CoA dehydrogenase activity
ACAD8	2.01535	1.84522	1.84653	2.24018	2.68204	2.76603	0.465415	0.106341	GeneID:27034,Genbank:XM_017017546.2,HGNC:HGNC:87,MIM:604773	acyl-CoA dehydrogenase family member 8	GO:0003995,GO:0005759,GO:0006351,GO:0006355,GO:0006574,GO:0006629,GO:0009083,GO:0050660	acyl-CoA dehydrogenase activity|mitochondrial matrix|transcription, DNA-templated|regulation of transcription, DNA-templated|valine catabolic process|lipid metabolic process|branched-chain amino acid catabolic process|flavin adenine dinucleotide binding	hsa00280	Valine, leucine and isoleucine degradation
ACAD9	5.17139	4.83526	4.75253	4.50767	4.44076	4.65909	-0.0625875	0.814469	GeneID:28976,Genbank:NM_014049.4,HGNC:HGNC:21497,MIM:611103	acyl-CoA dehydrogenase family member 9	GO:0001676,GO:0004466,GO:0005634,GO:0005739,GO:0005743,GO:0030425,GO:0031966,GO:0032981,GO:0050660,GO:0051791,GO:0070991	long-chain fatty acid metabolic process|long-chain-acyl-CoA dehydrogenase activity|nucleus|mitochondrion|mitochondrial inner membrane|dendrite|mitochondrial membrane|mitochondrial respiratory chain complex I assembly|flavin adenine dinucleotide binding|medium-chain fatty acid metabolic process|medium-chain-acyl-CoA dehydrogenase activity
ACADL	5.23047	4.69204	4.18656	3.63637	1.67613	4.42127	-0.712888	0.0575923	GeneID:33,Genbank:NM_001608.3,HGNC:HGNC:88,MIM:609576	acyl-CoA dehydrogenase long chain	GO:0000062,GO:0001659,GO:0003995,GO:0004466,GO:0005759,GO:0006635,GO:0016401,GO:0019254,GO:0031966,GO:0033539,GO:0042413,GO:0042758,GO:0044242,GO:0045717,GO:0046322,GO:0050660,GO:0051289,GO:0055114,GO:0090181	fatty-acyl-CoA binding|temperature homeostasis|acyl-CoA dehydrogenase activity|long-chain-acyl-CoA dehydrogenase activity|mitochondrial matrix|fatty acid beta-oxidation|palmitoyl-CoA oxidase activity|carnitine metabolic process, CoA-linked|mitochondrial membrane|fatty acid beta-oxidation using acyl-CoA dehydrogenase|carnitine catabolic process|long-chain fatty acid catabolic process|cellular lipi…	hsa00071,hsa03320	Fatty acid degradation|PPAR signaling pathway
ACADM	6.90449	5.59252	4.61922	5.86302	11.5681	8.36415	0.591571	0.0916905	GeneID:34,Genbank:NM_001127328.2,HGNC:HGNC:89,MIM:607008	acyl-CoA dehydrogenase medium chain	GO:0003995,GO:0005634,GO:0005739,GO:0005759,GO:0006635,GO:0016607,GO:0019216,GO:0019254,GO:0030424,GO:0031966,GO:0033539,GO:0042802,GO:0045329,GO:0050660,GO:0051791,GO:0051793,GO:0055114,GO:0070062,GO:0070991	acyl-CoA dehydrogenase activity|nucleus|mitochondrion|mitochondrial matrix|fatty acid beta-oxidation|nuclear speck|regulation of lipid metabolic process|carnitine metabolic process, CoA-linked|axon|mitochondrial membrane|fatty acid beta-oxidation using acyl-CoA dehydrogenase|identical protein binding|carnitine biosynthetic process|flavin adenine dinucleotide binding|medium-chain fatty acid metabo…	hsa00071,hsa00280,hsa00410,hsa00640,hsa03320	Fatty acid degradation|Valine, leucine and isoleucine degradation|beta-Alanine metabolism|Propanoate metabolism|PPAR signaling pathway
ACADS	6.57054	4.87713	4.74748	6.04988	4.53054	9.96208	0.289327	0.39334	GeneID:35,Genbank:NM_000017.3,HGNC:HGNC:90,MIM:606885	acyl-CoA dehydrogenase short chain			hsa00071,hsa00280,hsa00650	Fatty acid degradation|Valine, leucine and isoleucine degradation|Butanoate metabolism
ACADSB	4.52608	4.0209	3.90108	5.4639	4.68348	17.8783	0.838504	0.0554238	GeneID:36,Genbank:NM_001609.3,HGNC:HGNC:91,MIM:600301	acyl-CoA dehydrogenase short/branched chain	GO:0003995,GO:0005739,GO:0005759,GO:0006631,GO:0009083,GO:0050660,GO:0070062	acyl-CoA dehydrogenase activity|mitochondrion|mitochondrial matrix|fatty acid metabolic process|branched-chain amino acid catabolic process|flavin adenine dinucleotide binding|extracellular exosome	hsa00071,hsa00280	Fatty acid degradation|Valine, leucine and isoleucine degradation
ACADVL	30.607	23.4622	23.2483	35.5101	15.8141	46.3244	0.231644	0.493211	GeneID:37,Genbank:NM_001270447.1,HGNC:HGNC:92,MIM:609575	acyl-CoA dehydrogenase very long chain	GO:0001659,GO:0003995,GO:0004466,GO:0005634,GO:0005730,GO:0005739,GO:0005743,GO:0005759,GO:0005829,GO:0006635,GO:0009409,GO:0015980,GO:0030855,GO:0031966,GO:0033539,GO:0036498,GO:0042645,GO:0045717,GO:0046322,GO:0050660,GO:0090181	temperature homeostasis|acyl-CoA dehydrogenase activity|long-chain-acyl-CoA dehydrogenase activity|nucleus|nucleolus|mitochondrion|mitochondrial inner membrane|mitochondrial matrix|cytosol|fatty acid beta-oxidation|response to cold|energy derivation by oxidation of organic compounds|epithelial cell differentiation|mitochondrial membrane|fatty acid beta-oxidation using acyl-CoA dehydrogenase|IRE1-…	hsa00071	Fatty acid degradation
ACAP1	2.8283	3.51566	3.24298	4.08646	1.54602	1.33901	-0.603637	0.183522	GeneID:9744,Genbank:XM_024451047.1,HGNC:HGNC:16467,MIM:607763	ArfGAP with coiled-coil, ankyrin repeat and PH domains 1	GO:0005096,GO:0015031,GO:0016020,GO:0046872,GO:0055038	GTPase activator activity|protein transport|membrane|metal ion binding|recycling endosome membrane	hsa04144	Endocytosis
ACAP2	8.86802	9.94916	7.91741	7.55392	5.72268	7.41053	-0.393498	0.152149	GeneID:23527,Genbank:NM_012287.5,HGNC:HGNC:16469,MIM:607766	ArfGAP with coiled-coil, ankyrin repeat and PH domains 2	GO:0005096,GO:0010008,GO:0016020,GO:0017137,GO:0036010,GO:0046872,GO:0080025,GO:1990090	GTPase activator activity|endosome membrane|membrane|Rab GTPase binding|protein localization to endosome|metal ion binding|phosphatidylinositol-3,5-bisphosphate binding|cellular response to nerve growth factor stimulus	hsa04144	Endocytosis
ACAP3	2.72907	3.21961	2.78976	3.45819	4.16529	2.68499	0.227297	0.44743	GeneID:116983,Genbank:XM_005244715.2,HGNC:HGNC:16754	ArfGAP with coiled-coil, ankyrin repeat and PH domains 3	GO:0005096,GO:0046872	GTPase activator activity|metal ion binding	hsa04144	Endocytosis
ACAT1	5.08979	4.62688	4.7311	4.75012	4.65287	5.87207	0.0554378	0.838789	GeneID:38,Genbank:XM_024448512.1,HGNC:HGNC:93,MIM:607809	acetyl-CoA acetyltransferase 1	GO:0001889,GO:0003985,GO:0005739,GO:0005743,GO:0005759,GO:0006085,GO:0006550,GO:0006635,GO:0007420,GO:0009083,GO:0009725,GO:0014070,GO:0015936,GO:0015937,GO:0016830,GO:0016885,GO:0019899,GO:0042594,GO:0042803,GO:0046356,GO:0046872,GO:0046951,GO:0046952,GO:0050662,GO:0051260,GO:0060612,GO:0070062,GO:0072229,GO:1902224,GO:1902860	liver development|acetyl-CoA C-acetyltransferase activity|mitochondrion|mitochondrial inner membrane|mitochondrial matrix|acetyl-CoA biosynthetic process|isoleucine catabolic process|fatty acid beta-oxidation|brain development|branched-chain amino acid catabolic process|response to hormone|response to organic cyclic compound|coenzyme A metabolic process|coenzyme A biosynthetic process|carbon-carb…	hsa00071,hsa00072,hsa00280,hsa00310,hsa00380,hsa00620,hsa00630,hsa00640,hsa00650,hsa00900	Fatty acid degradation|Synthesis and degradation of ketone bodies|Valine, leucine and isoleucine degradation|Lysine degradation|Tryptophan metabolism|Pyruvate metabolism|Glyoxylate and dicarboxylate metabolism|Propanoate metabolism|Butanoate metabolism|Terpenoid backbone biosynthesis
ACAT2	5.06047	4.22385	3.33578	4.83368	4.28013	2.06637	-0.310463	0.359784	GeneID:39,Genbank:NM_005891.2,HGNC:HGNC:94,MIM:100678	acetyl-CoA acetyltransferase 2	GO:0003985,GO:0005634,GO:0005730,GO:0005737,GO:0005739,GO:0005829,GO:0006629,GO:0006635,GO:0006695,GO:0070062	acetyl-CoA C-acetyltransferase activity|nucleus|nucleolus|cytoplasm|mitochondrion|cytosol|lipid metabolic process|fatty acid beta-oxidation|cholesterol biosynthetic process|extracellular exosome	hsa00071,hsa00072,hsa00280,hsa00310,hsa00380,hsa00620,hsa00630,hsa00640,hsa00650,hsa00900,hsa04975	Fatty acid degradation|Synthesis and degradation of ketone bodies|Valine, leucine and isoleucine degradation|Lysine degradation|Tryptophan metabolism|Pyruvate metabolism|Glyoxylate and dicarboxylate metabolism|Propanoate metabolism|Butanoate metabolism|Terpenoid backbone biosynthesis|Fat digestion and absorption
ACBD3	14.4517	10.932	10.661	14.2459	17.6855	26.6203	0.653255	0.0567867	GeneID:64746,Genbank:NM_022735.3,HGNC:HGNC:15453,MIM:606809	acyl-CoA binding domain containing 3	GO:0000062,GO:0000139,GO:0005739,GO:0005794,GO:0006694,GO:0016020,GO:0034237	fatty-acyl-CoA binding|Golgi membrane|mitochondrion|Golgi apparatus|steroid biosynthetic process|membrane|protein kinase A regulatory subunit binding
ACBD4	1.30174	1.12939	1.29358	1.18996	1.32505	1.58837	0.14737	0.623867	GeneID:79777,Genbank:XM_017025088.1,HGNC:HGNC:23337	acyl-CoA binding domain containing 4	GO:0000062,GO:0008289	fatty-acyl-CoA binding|lipid binding
ACBD5	3.30785	3.09588	2.73499	2.7931	2.54477	3.22984	-0.108733	0.689216	GeneID:91452,Genbank:NM_001352570.1,HGNC:HGNC:23338,MIM:616618	acyl-CoA binding domain containing 5	GO:0000062,GO:0005778,GO:0008289,GO:0016021,GO:0030242	fatty-acyl-CoA binding|peroxisomal membrane|lipid binding|integral component of membrane|autophagy of peroxisome
ACBD6	4.41281	4.14195	4.44316	5.77337	6.55642	8.64665	0.679998	0.0233577	GeneID:84320,Genbank:NM_032360.3,HGNC:HGNC:23339,MIM:616352	acyl-CoA binding domain containing 6	GO:0000062,GO:0005829,GO:0006637,GO:0008289	fatty-acyl-CoA binding|cytosol|acyl-CoA metabolic process|lipid binding
ACCS	2.03677	1.45037	1.86593	2.14808	1.73517	1.15722	-0.0403213	0.914871	GeneID:84680,Genbank:XM_024448723.1,HGNC:HGNC:23989,MIM:608405	1-aminocyclopropane-1-carboxylate synthase homolog (inactive)	GO:0003824,GO:0009058,GO:0030170,GO:0042802,GO:0042803	catalytic activity|biosynthetic process|pyridoxal phosphate binding|identical protein binding|protein homodimerization activity
ACD	2.39535	1.76504	1.98852	2.17642	1.88573	1.13412	-0.420426	0.315738	GeneID:65057,Genbank:NM_001082487.1,HGNC:HGNC:25070,MIM:609377	ACD, shelterin complex subunit and telomerase recruitment factor	GO:0000723,GO:0000783,GO:0000784,GO:0005654,GO:0006886,GO:0016233,GO:0016604,GO:0031848,GO:0032202,GO:0032211,GO:0032212,GO:0042162,GO:0044877,GO:0051973,GO:0060381,GO:0070182,GO:0070187,GO:0070198,GO:0070200	telomere maintenance|nuclear telomere cap complex|nuclear chromosome, telomeric region|nucleoplasm|intracellular protein transport|telomere capping|nuclear body|protection from non-homologous end joining at telomere|telomere assembly|negative regulation of telomere maintenance via telomerase|positive regulation of telomere maintenance via telomerase|telomeric DNA binding|macromolecular complex bi…
ACE	30.6418	18.3602	20.0578	25.9024	4.53069	4.25415	-1.50474	0.00116788	GeneID:1636,Genbank:NM_000789.3,HGNC:HGNC:2707,MIM:106180	angiotensin I converting enzyme			hsa04614,hsa04924,hsa05142,hsa05410	Renin-angiotensin system|Renin secretion|Chagas disease (American trypanosomiasis)|Hypertrophic cardiomyopathy (HCM)
ACE2	0.220284	0.332252	0.248002	0.298451	0.69017	1.22822	1.24184	0.0150158	GeneID:59272,Genbank:XM_011545551.3,HGNC:HGNC:13557,MIM:300335	angiotensin I converting enzyme 2			hsa04614,hsa04974	Renin-angiotensin system|Protein digestion and absorption
ACER2	1.61094	1.09267	1.21339	1.0938	0.967593	0.95857	-0.389958	0.207508	GeneID:340485,Genbank:NM_001010887.2,HGNC:HGNC:23675,MIM:613492	alkaline ceramidase 2	GO:0000139,GO:0001953,GO:0005794,GO:0006672,GO:0006919,GO:0008284,GO:0010942,GO:0017040,GO:0030148,GO:0030173,GO:0032526,GO:0033629,GO:0035690,GO:0046512,GO:0071633,GO:0090285	Golgi membrane|negative regulation of cell-matrix adhesion|Golgi apparatus|ceramide metabolic process|activation of cysteine-type endopeptidase activity involved in apoptotic process|positive regulation of cell proliferation|positive regulation of cell death|ceramidase activity|sphingolipid biosynthetic process|integral component of Golgi membrane|response to retinoic acid|negative regulation of …	hsa00600,hsa04071	Sphingolipid metabolism|Sphingolipid signaling pathway
ACER3	3.94215	4.83537	3.30219	4.0933	2.35217	2.37592	-0.54598	0.0871513	GeneID:55331,Genbank:NM_018367.6,HGNC:HGNC:16066,MIM:617036	alkaline ceramidase 3	GO:0005789,GO:0006672,GO:0008284,GO:0030148,GO:0030173,GO:0030176,GO:0046512,GO:0070774,GO:0071602	endoplasmic reticulum membrane|ceramide metabolic process|positive regulation of cell proliferation|sphingolipid biosynthetic process|integral component of Golgi membrane|integral component of endoplasmic reticulum membrane|sphingosine biosynthetic process|phytoceramidase activity|phytosphingosine biosynthetic process	hsa00600	Sphingolipid metabolism
ACHE	0.459934	0.489845	0.533323	1.27519	0.498973	6.46756	1.73107	0.00390361	GeneID:43,Genbank:NM_001302622.1,HGNC:HGNC:108,MIM:100740	acetylcholinesterase (Cartwright blood group)			hsa00564,hsa04725	Glycerophospholipid metabolism|Cholinergic synapse
ACIN1	7.32725	7.39686	7.39495	7.48582	8.84019	7.3704	0.142536	0.588237	GeneID:22985,Genbank:NM_001164815.1,HGNC:HGNC:17066,MIM:604562	apoptotic chromatin condensation inducer 1	GO:0003676,GO:0003723,GO:0005634,GO:0005654,GO:0005730,GO:0005829,GO:0005886,GO:0006397,GO:0008380,GO:0016607,GO:0016887,GO:0019899,GO:0030218,GO:0030263,GO:0043065,GO:0045657,GO:0048025,GO:0061574,GO:0097194	nucleic acid binding|RNA binding|nucleus|nucleoplasm|nucleolus|cytosol|plasma membrane|mRNA processing|RNA splicing|nuclear speck|ATPase activity|enzyme binding|erythrocyte differentiation|apoptotic chromosome condensation|positive regulation of apoptotic process|positive regulation of monocyte differentiation|negative regulation of mRNA splicing, via spliceosome|ASAP complex|execution phase of a…	hsa03013,hsa03015,hsa03040	RNA transport|mRNA surveillance pathway|Spliceosome
ACKR1	10.7093	11.1972	9.71086	7.23327	2.68786	3.29535	-1.40965	0.000332626	GeneID:2532,Genbank:NM_002036.3,HGNC:HGNC:4035,MIM:613665	atypical chemokine receptor 1 (Duffy blood group)			hsa05144	Malaria
ACKR3	3.58571	2.99191	3.03372	2.38146	1.13418	1.42267	-1.07213	0.00371523	GeneID:57007,Genbank:XM_005246098.3,HGNC:HGNC:23692,MIM:610376	atypical chemokine receptor 3			hsa04060	Cytokine-cytokine receptor interaction
ACKR4	1.78626	2.18981	1.17148	1.24162	0.289978	0.724106	-1.39398	0.0109356	GeneID:51554,Genbank:NM_016557.3,HGNC:HGNC:1611,MIM:606065	atypical chemokine receptor 4	GO:0004950,GO:0005044,GO:0005769,GO:0005886,GO:0005887,GO:0006935,GO:0006955,GO:0007186,GO:0019956,GO:0055037	chemokine receptor activity|scavenger receptor activity|early endosome|plasma membrane|integral component of plasma membrane|chemotaxis|immune response|G-protein coupled receptor signaling pathway|chemokine binding|recycling endosome	hsa04060	Cytokine-cytokine receptor interaction
ACLY	13.0493	11.821	10.8699	12.5416	12.4741	12.1203	0.0762029	0.758833	GeneID:47,Genbank:XM_017024688.1,HGNC:HGNC:115,MIM:108728	ATP citrate lyase			hsa00020	Citrate cycle (TCA cycle)
ACO1	8.83122	6.89653	7.52244	9.14619	6.9547	9.67221	0.121813	0.640559	GeneID:48,Genbank:NM_001278352.1,HGNC:HGNC:117,MIM:100880	aconitase 1			hsa00020,hsa00630	Citrate cycle (TCA cycle)|Glyoxylate and dicarboxylate metabolism
ACO2	12.6615	12.3539	10.5278	11.5535	14.0099	11.5853	0.143824	0.575059	GeneID:50,Genbank:XM_024452250.1,HGNC:HGNC:118,MIM:100850	aconitase 2			hsa00020,hsa00630	Citrate cycle (TCA cycle)|Glyoxylate and dicarboxylate metabolism
ACOT1	2.11722	0.64886	1.78452	2.40824	0.732225	3.52439	0.400476	0.279945	GeneID:641371,Genbank:XM_017021591.1,HGNC:HGNC:33128,MIM:614313	acyl-CoA thioesterase 1	GO:0000038,GO:0001676,GO:0005102,GO:0005739,GO:0005759,GO:0006637,GO:0016290,GO:0047617,GO:0052689,GO:0070062,GO:0102991	very long-chain fatty acid metabolic process|long-chain fatty acid metabolic process|receptor binding|mitochondrion|mitochondrial matrix|acyl-CoA metabolic process|palmitoyl-CoA hydrolase activity|acyl-CoA hydrolase activity|carboxylic ester hydrolase activity|extracellular exosome|myristoyl-CoA hydrolase activity	hsa00062,hsa01040	Fatty acid elongation|Biosynthesis of unsaturated fatty acids
ACOT11	0.623003	0.69174	0.766753	0.767941	0.641564	1.46046	0.304272	0.432965	GeneID:26027,Genbank:NM_015547.3,HGNC:HGNC:18156,MIM:606803	acyl-CoA thioesterase 11	GO:0005829,GO:0006631,GO:0006637,GO:0008289,GO:0009266,GO:0009409,GO:0035556,GO:0047617,GO:0052689,GO:0070062	cytosol|fatty acid metabolic process|acyl-CoA metabolic process|lipid binding|response to temperature stimulus|response to cold|intracellular signal transduction|acyl-CoA hydrolase activity|carboxylic ester hydrolase activity|extracellular exosome
ACOT13	1.74091	1.68648	1.2634	1.79147	3.62279	2.7006	0.79355	0.0225333	GeneID:55856,Genbank:NM_001160094.1,HGNC:HGNC:20999,MIM:615652	acyl-CoA thioesterase 13	GO:0005634,GO:0005737,GO:0005739,GO:0005819,GO:0005829,GO:0006637,GO:0047617,GO:0051289,GO:0070062	nucleus|cytoplasm|mitochondrion|spindle|cytosol|acyl-CoA metabolic process|acyl-CoA hydrolase activity|protein homotetramerization|extracellular exosome
ACOT2	6.64447	3.81931	4.77566	5.44871	4.07056	11.4009	0.426993	0.235659	GeneID:10965,Genbank:NM_006821.5,HGNC:HGNC:18431,MIM:609972	acyl-CoA thioesterase 2	GO:0000038,GO:0001676,GO:0005102,GO:0005739,GO:0005759,GO:0006637,GO:0016290,GO:0047617,GO:0052689,GO:0070062,GO:0102991	very long-chain fatty acid metabolic process|long-chain fatty acid metabolic process|receptor binding|mitochondrion|mitochondrial matrix|acyl-CoA metabolic process|palmitoyl-CoA hydrolase activity|acyl-CoA hydrolase activity|carboxylic ester hydrolase activity|extracellular exosome|myristoyl-CoA hydrolase activity	hsa00062,hsa01040,hsa04913	Fatty acid elongation|Biosynthesis of unsaturated fatty acids|Ovarian steroidogenesis
ACOT4	1.55578	1.12923	1.00602	1.42444	2.10485	2.08922	0.618027	0.159925	GeneID:122970,Genbank:NM_152331.3,HGNC:HGNC:19748,MIM:614314	acyl-CoA thioesterase 4	GO:0000038,GO:0001676,GO:0004778,GO:0005102,GO:0005777,GO:0005782,GO:0006104,GO:0006637,GO:0016290,GO:0032788,GO:0032789,GO:0043648,GO:0043649,GO:0046459,GO:0047617,GO:0052689,GO:0102991	very long-chain fatty acid metabolic process|long-chain fatty acid metabolic process|succinyl-CoA hydrolase activity|receptor binding|peroxisome|peroxisomal matrix|succinyl-CoA metabolic process|acyl-CoA metabolic process|palmitoyl-CoA hydrolase activity|saturated monocarboxylic acid metabolic process|unsaturated monocarboxylic acid metabolic process|dicarboxylic acid metabolic process|dicarboxyl…	hsa00062,hsa01040	Fatty acid elongation|Biosynthesis of unsaturated fatty acids
ACOT7	3.31386	3.31988	2.60982	3.61463	2.67838	1.99542	-0.131211	0.696082	GeneID:11332,Genbank:NM_007274.3,HGNC:HGNC:24157,MIM:602587	acyl-CoA thioesterase 7	GO:0000062,GO:0005654,GO:0005739,GO:0005829,GO:0006637,GO:0015937,GO:0016290,GO:0036042,GO:0036114,GO:0036116,GO:0042803,GO:0047617,GO:0051792,GO:0052689,GO:0070062,GO:0102991,GO:1900535	fatty-acyl-CoA binding|nucleoplasm|mitochondrion|cytosol|acyl-CoA metabolic process|coenzyme A biosynthetic process|palmitoyl-CoA hydrolase activity|long-chain fatty acyl-CoA binding|medium-chain fatty-acyl-CoA catabolic process|long-chain fatty-acyl-CoA catabolic process|protein homodimerization activity|acyl-CoA hydrolase activity|medium-chain fatty acid biosynthetic process|carboxylic ester hy…	hsa00062,hsa01040	Fatty acid elongation|Biosynthesis of unsaturated fatty acids
ACOT8	4.19078	3.53678	2.3808	3.91659	2.49998	3.48823	0.076475	0.827521	GeneID:10005,Genbank:NM_005469.3,HGNC:HGNC:15919,MIM:608123	acyl-CoA thioesterase 8	GO:0003986,GO:0005102,GO:0005739,GO:0005782,GO:0006637,GO:0006699,GO:0009062,GO:0016032,GO:0016289,GO:0016290,GO:0016559,GO:0033540,GO:0033882,GO:0036109,GO:0043649,GO:0045225,GO:0047617,GO:0052689,GO:0052815	acetyl-CoA hydrolase activity|receptor binding|mitochondrion|peroxisomal matrix|acyl-CoA metabolic process|bile acid biosynthetic process|fatty acid catabolic process|viral process|CoA hydrolase activity|palmitoyl-CoA hydrolase activity|peroxisome fission|fatty acid beta-oxidation using acyl-CoA oxidase|choloyl-CoA hydrolase activity|alpha-linolenic acid metabolic process|dicarboxylic acid catabo…	hsa00120,hsa04146	Primary bile acid biosynthesis|Peroxisome
ACOT9	5.3414	4.60629	3.75091	4.69945	3.407	2.64365	-0.365058	0.178469	GeneID:23597,Genbank:NM_001330259.1,HGNC:HGNC:17152,MIM:300862	acyl-CoA thioesterase 9	GO:0003986,GO:0005739,GO:0005759,GO:0006637,GO:0047617,GO:0052689	acetyl-CoA hydrolase activity|mitochondrion|mitochondrial matrix|acyl-CoA metabolic process|acyl-CoA hydrolase activity|carboxylic ester hydrolase activity
ACOX1	9.98278	8.90283	8.86421	8.39279	10.0334	10.3556	0.0449055	0.864936	GeneID:51,Genbank:NM_004035.6,HGNC:HGNC:119,MIM:609751	acyl-CoA oxidase 1	GO:0000038,GO:0003995,GO:0003997,GO:0005102,GO:0005634,GO:0005654,GO:0005730,GO:0005739,GO:0005777,GO:0005778,GO:0005782,GO:0005886,GO:0006091,GO:0006629,GO:0006693,GO:0007283,GO:0016020,GO:0016401,GO:0016559,GO:0019216,GO:0019395,GO:0030165,GO:0033539,GO:0033540,GO:0036109,GO:0043231,GO:0047485,GO:0050660,GO:0055088,GO:0071949,GO:2000189	very long-chain fatty acid metabolic process|acyl-CoA dehydrogenase activity|acyl-CoA oxidase activity|receptor binding|nucleus|nucleoplasm|nucleolus|mitochondrion|peroxisome|peroxisomal membrane|peroxisomal matrix|plasma membrane|generation of precursor metabolites and energy|lipid metabolic process|prostaglandin metabolic process|spermatogenesis|membrane|palmitoyl-CoA oxidase activity|peroxisom…	hsa00071,hsa00592,hsa01040,hsa03320,hsa04024,hsa04146	Fatty acid degradation|alpha-Linolenic acid metabolism|Biosynthesis of unsaturated fatty acids|PPAR signaling pathway|cAMP signaling pathway|Peroxisome
ACOX2	1.70595	1.55094	1.68112	1.48594	1.46743	2.74797	0.328791	0.32247	GeneID:8309,Genbank:NM_003500.3,HGNC:HGNC:120,MIM:601641	acyl-CoA oxidase 2	GO:0003995,GO:0003997,GO:0005102,GO:0005777,GO:0005782,GO:0005829,GO:0006699,GO:0010942,GO:0016402,GO:0033539,GO:0033540,GO:0033791,GO:0042803,GO:0043231,GO:0050660,GO:0071949,GO:1902884	acyl-CoA dehydrogenase activity|acyl-CoA oxidase activity|receptor binding|peroxisome|peroxisomal matrix|cytosol|bile acid biosynthetic process|positive regulation of cell death|pristanoyl-CoA oxidase activity|fatty acid beta-oxidation using acyl-CoA dehydrogenase|fatty acid beta-oxidation using acyl-CoA oxidase|3alpha,7alpha,12alpha-trihydroxy-5beta-cholestanoyl-CoA 24-hydroxylase activity|prote…	hsa00120,hsa03320,hsa04146	Primary bile acid biosynthesis|PPAR signaling pathway|Peroxisome
ACOX3	2.0936	1.77082	2.54017	1.83022	1.57911	2.66639	-0.0798888	0.773426	GeneID:8310,Genbank:XM_011513566.1,HGNC:HGNC:121,MIM:603402	acyl-CoA oxidase 3, pristanoyl	GO:0003995,GO:0005102,GO:0005739,GO:0005777,GO:0005782,GO:0016020,GO:0016402,GO:0033539,GO:0033540,GO:0050660,GO:0071949	acyl-CoA dehydrogenase activity|receptor binding|mitochondrion|peroxisome|peroxisomal matrix|membrane|pristanoyl-CoA oxidase activity|fatty acid beta-oxidation using acyl-CoA dehydrogenase|fatty acid beta-oxidation using acyl-CoA oxidase|flavin adenine dinucleotide binding|FAD binding	hsa00071,hsa00592,hsa01040,hsa03320,hsa04024,hsa04146	Fatty acid degradation|alpha-Linolenic acid metabolism|Biosynthesis of unsaturated fatty acids|PPAR signaling pathway|cAMP signaling pathway|Peroxisome
ACOXL	1.06334	1.0574	0.97163	1.00527	0.757938	1.08304	-0.0793041	0.788665	GeneID:55289,Genbank:XM_011511404.3,HGNC:HGNC:25621	acyl-CoA oxidase like	GO:0003995,GO:0005782,GO:0016402,GO:0033539,GO:0033540,GO:0050660	acyl-CoA dehydrogenase activity|peroxisomal matrix|pristanoyl-CoA oxidase activity|fatty acid beta-oxidation using acyl-CoA dehydrogenase|fatty acid beta-oxidation using acyl-CoA oxidase|flavin adenine dinucleotide binding
ACP1	15.6082	11.7713	10.1167	14.6172	11.0251	16.5882	0.129547	0.673004	GeneID:52,Genbank:NM_004300.3,HGNC:HGNC:122,MIM:171500	acid phosphatase 1	GO:0003993,GO:0004726,GO:0005737,GO:0005829,GO:0009898,GO:0042383,GO:0070062	acid phosphatase activity|non-membrane spanning protein tyrosine phosphatase activity|cytoplasm|cytosol|cytoplasmic side of plasma membrane|sarcolemma|extracellular exosome	hsa00730,hsa00740,hsa04520	Thiamine metabolism|Riboflavin metabolism|Adherens junction
ACP2	4.71244	5.04837	4.51156	5.97543	5.14631	5.39406	0.238676	0.402623	GeneID:53,Genbank:NM_001302490.1,HGNC:HGNC:123,MIM:171650	acid phosphatase 2, lysosomal	GO:0001501,GO:0003993,GO:0005764,GO:0005765,GO:0007040,GO:0016020,GO:0016021,GO:0043202,GO:0070062	skeletal system development|acid phosphatase activity|lysosome|lysosomal membrane|lysosome organization|membrane|integral component of membrane|lysosomal lumen|extracellular exosome	hsa00740,hsa04142	Riboflavin metabolism|Lysosome
ACP5	39.157	68.7147	38.2382	63.6251	26.4663	27.0072	-0.31137	0.463111	GeneID:54,Genbank:NM_001111036.2,HGNC:HGNC:124,MIM:171640	acid phosphatase 5, tartrate resistant			hsa00740,hsa04142,hsa04380,hsa05323	Riboflavin metabolism|Lysosome|Osteoclast differentiation|Rheumatoid arthritis
ACP6	0.40994	0.523899	0.686434	0.584577	1.02138	1.43157	0.880362	0.00620473	GeneID:51205,Genbank:XM_011509601.3,HGNC:HGNC:29609,MIM:611471	acid phosphatase 6, lysophosphatidic	GO:0003993,GO:0005737,GO:0005739,GO:0005759,GO:0006644,GO:0006654,GO:0052642,GO:2001311	acid phosphatase activity|cytoplasm|mitochondrion|mitochondrial matrix|phospholipid metabolic process|phosphatidic acid biosynthetic process|lysophosphatidic acid phosphatase activity|lysobisphosphatidic acid metabolic process
ACPP	1.42375	1.25537	1.28055	1.72331	1.32405	1.85983	0.266218	0.391539	GeneID:55,Genbank:NM_001134194.1,HGNC:HGNC:125,MIM:171790	acid phosphatase, prostate	GO:0003993,GO:0005615,GO:0005622,GO:0005634,GO:0005765,GO:0005886,GO:0006144,GO:0006772,GO:0008253,GO:0009117,GO:0012506,GO:0016021,GO:0016311,GO:0016791,GO:0030175,GO:0035577,GO:0042131,GO:0042802,GO:0042803,GO:0043312,GO:0046085,GO:0051289,GO:0051930,GO:0052642,GO:0060168,GO:0070062	acid phosphatase activity|extracellular space|intracellular|nucleus|lysosomal membrane|plasma membrane|purine nucleobase metabolic process|thiamine metabolic process|5'-nucleotidase activity|nucleotide metabolic process|vesicle membrane|integral component of membrane|dephosphorylation|phosphatase activity|filopodium|azurophil granule membrane|thiamine phosphate phosphatase activity|identical prot…
ACSF2	5.16214	3.63027	3.41634	4.51446	7.80184	4.76935	0.446907	0.186404	GeneID:80221,Genbank:NM_001288968.1,HGNC:HGNC:26101,MIM:610465	acyl-CoA synthetase family member 2	GO:0003996,GO:0005524,GO:0005759,GO:0006631,GO:0006637	acyl-CoA ligase activity|ATP binding|mitochondrial matrix|fatty acid metabolic process|acyl-CoA metabolic process
ACSL1	26.7851	18.1563	11.162	23.4101	12.8854	6.24574	-0.534881	0.0644449	GeneID:2180,Genbank:XM_017007887.1,HGNC:HGNC:3569,MIM:152425	acyl-CoA synthetase long chain family member 1	GO:0001676,GO:0004467,GO:0005524,GO:0005739,GO:0005741,GO:0005778,GO:0005789,GO:0005886,GO:0006641,GO:0007584,GO:0008610,GO:0014070,GO:0016020,GO:0016021,GO:0019216,GO:0033211,GO:0034201,GO:0035338,GO:0036109,GO:0042178,GO:0042493,GO:0043651,GO:0044539,GO:0071902,GO:0102391	long-chain fatty acid metabolic process|long-chain fatty acid-CoA ligase activity|ATP binding|mitochondrion|mitochondrial outer membrane|peroxisomal membrane|endoplasmic reticulum membrane|plasma membrane|triglyceride metabolic process|response to nutrient|lipid biosynthetic process|response to organic cyclic compound|membrane|integral component of membrane|regulation of lipid metabolic process|a…	hsa00061,hsa00071,hsa03320,hsa04146,hsa04216,hsa04714,hsa04920	Fatty acid biosynthesis|Fatty acid degradation|PPAR signaling pathway|Peroxisome|Ferroptosis|Thermogenesis|Adipocytokine signaling pathway
ACSL3	14.4659	11.6617	10.5235	15.1247	12.3746	11.0778	0.0163596	0.947705	GeneID:2181,Genbank:NM_004457.4,HGNC:HGNC:3570,MIM:602371	acyl-CoA synthetase long chain family member 3	GO:0004467,GO:0005524,GO:0005741,GO:0005778,GO:0005783,GO:0005789,GO:0005794,GO:0005811,GO:0006633,GO:0007420,GO:0007584,GO:0014070,GO:0016020,GO:0016021,GO:0019901,GO:0019904,GO:0034379,GO:0035338,GO:0042998,GO:0044539,GO:0048471,GO:0051047,GO:0102391,GO:2001247	long-chain fatty acid-CoA ligase activity|ATP binding|mitochondrial outer membrane|peroxisomal membrane|endoplasmic reticulum|endoplasmic reticulum membrane|Golgi apparatus|lipid droplet|fatty acid biosynthetic process|brain development|response to nutrient|response to organic cyclic compound|membrane|integral component of membrane|protein kinase binding|protein domain specific binding|very-low-d…	hsa00061,hsa00071,hsa03320,hsa04146,hsa04216,hsa04714,hsa04920	Fatty acid biosynthesis|Fatty acid degradation|PPAR signaling pathway|Peroxisome|Ferroptosis|Thermogenesis|Adipocytokine signaling pathway
ACSL4	21.6787	18.6523	15.5224	14.2741	5.76689	16.4943	-0.80633	0.0352941	GeneID:2182,Genbank:NM_001318510.1,HGNC:HGNC:3571,MIM:300157	acyl-CoA synthetase long chain family member 4	GO:0004467,GO:0005524,GO:0005737,GO:0005741,GO:0005778,GO:0005789,GO:0005811,GO:0006629,GO:0006641,GO:0007584,GO:0008610,GO:0015908,GO:0016020,GO:0016021,GO:0030182,GO:0030307,GO:0031957,GO:0032307,GO:0035338,GO:0043025,GO:0044233,GO:0047676,GO:0060136,GO:0060996,GO:0070062,GO:0070672,GO:0102391	long-chain fatty acid-CoA ligase activity|ATP binding|cytoplasm|mitochondrial outer membrane|peroxisomal membrane|endoplasmic reticulum membrane|lipid droplet|lipid metabolic process|triglyceride metabolic process|response to nutrient|lipid biosynthetic process|fatty acid transport|membrane|integral component of membrane|neuron differentiation|positive regulation of cell growth|very long-chain fa…	hsa00061,hsa00071,hsa03320,hsa04146,hsa04216,hsa04714,hsa04920	Fatty acid biosynthesis|Fatty acid degradation|PPAR signaling pathway|Peroxisome|Ferroptosis|Thermogenesis|Adipocytokine signaling pathway
ACSL5	11.7772	13.5736	14.1333	15.3758	21.8931	17.6081	0.438575	0.101774	GeneID:51703,Genbank:NM_203379.1,HGNC:HGNC:16526,MIM:605677	acyl-CoA synthetase long chain family member 5	GO:0001676,GO:0004467,GO:0005524,GO:0005634,GO:0005730,GO:0005739,GO:0005741,GO:0005743,GO:0005783,GO:0005789,GO:0016020,GO:0016021,GO:0035338,GO:0102391,GO:2001236	long-chain fatty acid metabolic process|long-chain fatty acid-CoA ligase activity|ATP binding|nucleus|nucleolus|mitochondrion|mitochondrial outer membrane|mitochondrial inner membrane|endoplasmic reticulum|endoplasmic reticulum membrane|membrane|integral component of membrane|long-chain fatty-acyl-CoA biosynthetic process|decanoate--CoA ligase activity|regulation of extrinsic apoptotic signaling …	hsa00061,hsa00071,hsa03320,hsa04146,hsa04216,hsa04714,hsa04920	Fatty acid biosynthesis|Fatty acid degradation|PPAR signaling pathway|Peroxisome|Ferroptosis|Thermogenesis|Adipocytokine signaling pathway
ACSM3	0.631074	0.815548	1.29261	1.09102	2.17268	1.80588	0.957036	0.00753799	GeneID:6296,Genbank:XM_024450369.1,HGNC:HGNC:10522,MIM:145505	acyl-CoA synthetase medium chain family member 3	GO:0003996,GO:0004321,GO:0005524,GO:0005759,GO:0006633,GO:0006637,GO:0008217,GO:0015645,GO:0042632,GO:0046872,GO:0047760	acyl-CoA ligase activity|fatty-acyl-CoA synthase activity|ATP binding|mitochondrial matrix|fatty acid biosynthetic process|acyl-CoA metabolic process|regulation of blood pressure|fatty acid ligase activity|cholesterol homeostasis|metal ion binding|butyrate-CoA ligase activity	hsa00650	Butanoate metabolism
ACSS1	9.03811	8.16422	7.42022	8.79733	5.33588	4.75616	-0.442621	0.146077	GeneID:84532,Genbank:NM_001252675.1,HGNC:HGNC:16091,MIM:614355	acyl-CoA synthetase short chain family member 1	GO:0003987,GO:0005524,GO:0005759,GO:0006069,GO:0006085,GO:0016208,GO:0019413,GO:0019427,GO:0019542	acetate-CoA ligase activity|ATP binding|mitochondrial matrix|ethanol oxidation|acetyl-CoA biosynthetic process|AMP binding|acetate biosynthetic process|acetyl-CoA biosynthetic process from acetate|propionate biosynthetic process	hsa00010,hsa00620,hsa00630,hsa00640	Glycolysis / Gluconeogenesis|Pyruvate metabolism|Glyoxylate and dicarboxylate metabolism|Propanoate metabolism
ACSS2	9.26149	8.23853	6.54658	9.68065	4.7123	6.75825	-0.213711	0.4933	GeneID:55902,Genbank:XM_011528911.1,HGNC:HGNC:15814,MIM:605832	acyl-CoA synthetase short chain family member 2	GO:0003987,GO:0005524,GO:0005654,GO:0005737,GO:0005759,GO:0005829,GO:0006069,GO:0007005,GO:0008610,GO:0016208,GO:0019413,GO:0019427,GO:0019542,GO:0043231	acetate-CoA ligase activity|ATP binding|nucleoplasm|cytoplasm|mitochondrial matrix|cytosol|ethanol oxidation|mitochondrion organization|lipid biosynthetic process|AMP binding|acetate biosynthetic process|acetyl-CoA biosynthetic process from acetate|propionate biosynthetic process|intracellular membrane-bounded organelle	hsa00010,hsa00620,hsa00630,hsa00640	Glycolysis / Gluconeogenesis|Pyruvate metabolism|Glyoxylate and dicarboxylate metabolism|Propanoate metabolism
ACSS3	4.53903	3.62955	4.24458	3.14942	0.74205	0.519066	-2.09933	2.04187e-05	GeneID:79611,Genbank:NM_001330243.1,HGNC:HGNC:24723,MIM:614356	acyl-CoA synthetase short chain family member 3	GO:0003987,GO:0005524,GO:0005759,GO:0046951	acetate-CoA ligase activity|ATP binding|mitochondrial matrix|ketone body biosynthetic process	hsa00640	Propanoate metabolism
ACTA2	39.0764	36.9368	40.1968	39.2752	21.6326	14.9221	-0.679714	0.0706535	GeneID:59,Genbank:NM_001320855.1,HGNC:HGNC:130,MIM:102620	actin, alpha 2, smooth muscle, aorta	GO:0001725,GO:0005524,GO:0005615,GO:0005737,GO:0005856,GO:0006936,GO:0008217,GO:0009615,GO:0010628,GO:0014829,GO:0015629,GO:0019901,GO:0030027,GO:0030175,GO:0030485,GO:0043234,GO:0044297,GO:0061041,GO:0061870,GO:0061874,GO:0070062,GO:0070374,GO:0072144,GO:0090131,GO:2000491	stress fiber|ATP binding|extracellular space|cytoplasm|cytoskeleton|muscle contraction|regulation of blood pressure|response to virus|positive regulation of gene expression|vascular smooth muscle contraction|actin cytoskeleton|protein kinase binding|lamellipodium|filopodium|smooth muscle contractile fiber|protein complex|cell body|regulation of wound healing|positive regulation of hepatic stellat…	hsa04270,hsa04371,hsa04926	Vascular smooth muscle contraction|Apelin signaling pathway|Relaxin signaling pathway
ACTB	933.38	867.646	778.201	924.639	829.631	907.951	0.104169	0.669557	GeneID:60,Genbank:NM_001101.4,HGNC:HGNC:132,MIM:102630	actin beta	GO:0000790,GO:0001725,GO:0001895,GO:0002102,GO:0005524,GO:0005615,GO:0005634,GO:0005829,GO:0005856,GO:0005886,GO:0005925,GO:0007409,GO:0007623,GO:0009612,GO:0014069,GO:0015629,GO:0016020,GO:0019894,GO:0019901,GO:0021762,GO:0030424,GO:0030529,GO:0030863,GO:0030957,GO:0031982,GO:0032091,GO:0035267,GO:0035902,GO:0036464,GO:0042802,GO:0043044,GO:0043209,GO:0043234,GO:0045121,GO:0050998,GO:0060041,GO:…	nuclear chromatin|stress fiber|retina homeostasis|podosome|ATP binding|extracellular space|nucleus|cytosol|cytoskeleton|plasma membrane|focal adhesion|axonogenesis|circadian rhythm|response to mechanical stimulus|postsynaptic density|actin cytoskeleton|membrane|kinesin binding|protein kinase binding|substantia nigra development|axon|intracellular ribonucleoprotein complex|cortical cytoskeleton|Ta…	hsa04015,hsa04145,hsa04210,hsa04390,hsa04510,hsa04520,hsa04530,hsa04611,hsa04670,hsa04714,hsa04810,hsa04919,hsa04921,hsa04971,hsa05100,hsa05110,hsa05130,hsa05131,hsa05132,hsa05164,hsa05205,hsa05225,hsa05410,hsa05412,hsa05414,hsa05416,hsa05418	Rap1 signaling pathway|Phagosome|Apoptosis|Hippo signaling pathway|Focal adhesion|Adherens junction|Tight junction|Platelet activation|Leukocyte transendothelial migration|Thermogenesis|Regulation of actin cytoskeleton|Thyroid hormone signaling pathway|Oxytocin signaling pathway|Gastric acid secretion|Bacterial invasion of epithelial cells|Vibrio cholerae infection|Pathogenic Escherichia coli inf…
ACTG1	352.264	273.836	278.405	312.849	235.31	288.738	-0.04842	0.84306	GeneID:71,Genbank:NM_001614.3,HGNC:HGNC:144,MIM:102560	actin gamma 1	GO:0001895,GO:0005200,GO:0005522,GO:0005524,GO:0005615,GO:0005634,GO:0005829,GO:0005856,GO:0005884,GO:0005886,GO:0005925,GO:0009612,GO:0015629,GO:0016020,GO:0030016,GO:0031012,GO:0031625,GO:0031941,GO:0042802,GO:0043209,GO:0045214,GO:0045335,GO:0051592,GO:0070062,GO:0070527,GO:0071346,GO:0072562,GO:0097433	retina homeostasis|structural constituent of cytoskeleton|profilin binding|ATP binding|extracellular space|nucleus|cytosol|cytoskeleton|actin filament|plasma membrane|focal adhesion|response to mechanical stimulus|actin cytoskeleton|membrane|myofibril|extracellular matrix|ubiquitin protein ligase binding|filamentous actin|identical protein binding|myelin sheath|sarcomere organization|phagocytic v…	hsa04015,hsa04145,hsa04210,hsa04390,hsa04510,hsa04520,hsa04530,hsa04611,hsa04670,hsa04714,hsa04810,hsa04919,hsa04921,hsa05100,hsa05110,hsa05130,hsa05131,hsa05132,hsa05164,hsa05205,hsa05225,hsa05410,hsa05412,hsa05414,hsa05416,hsa05418	Rap1 signaling pathway|Phagosome|Apoptosis|Hippo signaling pathway|Focal adhesion|Adherens junction|Tight junction|Platelet activation|Leukocyte transendothelial migration|Thermogenesis|Regulation of actin cytoskeleton|Thyroid hormone signaling pathway|Oxytocin signaling pathway|Bacterial invasion of epithelial cells|Vibrio cholerae infection|Pathogenic Escherichia coli infection|Shigellosis|Salm…
ACTG2	12.0948	10.6798	9.90875	8.26556	2.78013	2.22267	-1.5429	0.000305141	GeneID:72,Genbank:NM_001615.3,HGNC:HGNC:145,MIM:102545	actin, gamma 2, smooth muscle, enteric	GO:0005524,GO:0005615,GO:0005737,GO:0010628,GO:0030027,GO:0030175,GO:0032982,GO:0044297,GO:0070062,GO:0071944,GO:0072562,GO:0090131	ATP binding|extracellular space|cytoplasm|positive regulation of gene expression|lamellipodium|filopodium|myosin filament|cell body|extracellular exosome|cell periphery|blood microparticle|mesenchyme migration	hsa04270	Vascular smooth muscle contraction
ACTL10	0.551969	0.464567	0.45048	0.898855	0.764042	1.06107	1.00436	0.068904	GeneID:170487,Genbank:NM_001024675.1,HGNC:HGNC:16127	actin like 10
ACTL6A	6.25042	4.91316	5.07981	5.61282	7.0569	7.41931	0.269332	0.392558	GeneID:86,Genbank:NM_178042.3,HGNC:HGNC:24124,MIM:604958	actin like 6A	GO:0000790,GO:0003407,GO:0003682,GO:0003713,GO:0005634,GO:0005654,GO:0005886,GO:0006281,GO:0006310,GO:0006338,GO:0006351,GO:0006357,GO:0007165,GO:0016514,GO:0016579,GO:0021510,GO:0031011,GO:0035267,GO:0040008,GO:0043044,GO:0043234,GO:0043967,GO:0043968,GO:0071564,GO:1903146,GO:1903955	nuclear chromatin|neural retina development|chromatin binding|transcription coactivator activity|nucleus|nucleoplasm|plasma membrane|DNA repair|DNA recombination|chromatin remodeling|transcription, DNA-templated|regulation of transcription from RNA polymerase II promoter|signal transduction|SWI/SNF complex|protein deubiquitination|spinal cord development|Ino80 complex|NuA4 histone acetyltransfera…	hsa04714,hsa05225	Thermogenesis|Hepatocellular carcinoma
ACTN1	12.1887	10.2783	10.278	11.2601	8.10046	8.59687	-0.183576	0.494926	GeneID:87,Genbank:NM_001130005.1,HGNC:HGNC:163,MIM:102575	actinin alpha 1	GO:0001725,GO:0001726,GO:0002576,GO:0003725,GO:0005178,GO:0005509,GO:0005576,GO:0005615,GO:0005622,GO:0005737,GO:0005829,GO:0005886,GO:0005903,GO:0005911,GO:0005916,GO:0005925,GO:0007015,GO:0017166,GO:0030018,GO:0030220,GO:0030374,GO:0031093,GO:0031143,GO:0036344,GO:0042803,GO:0042981,GO:0042995,GO:0044325,GO:0048041,GO:0051015,GO:0051017,GO:0051271,GO:0051639,GO:0051764,GO:0070062	stress fiber|ruffle|platelet degranulation|double-stranded RNA binding|integrin binding|calcium ion binding|extracellular region|extracellular space|intracellular|cytoplasm|cytosol|plasma membrane|brush border|cell-cell junction|fascia adherens|focal adhesion|actin filament organization|vinculin binding|Z disc|platelet formation|ligand-dependent nuclear receptor transcription coactivator activity…	hsa04510,hsa04520,hsa04530,hsa04670,hsa04810,hsa05146,hsa05203,hsa05322	Focal adhesion|Adherens junction|Tight junction|Leukocyte transendothelial migration|Regulation of actin cytoskeleton|Amoebiasis|Viral carcinogenesis|Systemic lupus erythematosus
ACTN4	60.0687	47.6617	37.6331	49.4342	31.9059	45.9668	-0.112772	0.676301	GeneID:81,Genbank:NM_004924.5,HGNC:HGNC:166,MIM:604638	actinin alpha 4	GO:0000977,GO:0001666,GO:0001725,GO:0001882,GO:0002576,GO:0003723,GO:0003779,GO:0005178,GO:0005509,GO:0005576,GO:0005615,GO:0005622,GO:0005634,GO:0005737,GO:0005829,GO:0005903,GO:0005911,GO:0005925,GO:0015031,GO:0016604,GO:0030018,GO:0030050,GO:0030335,GO:0030374,GO:0030529,GO:0030863,GO:0031093,GO:0031143,GO:0031490,GO:0032417,GO:0035257,GO:0035357,GO:0042803,GO:0042974,GO:0042981,GO:0043005,GO:…	RNA polymerase II regulatory region sequence-specific DNA binding|response to hypoxia|stress fiber|nucleoside binding|platelet degranulation|RNA binding|actin binding|integrin binding|calcium ion binding|extracellular region|extracellular space|intracellular|nucleus|cytoplasm|cytosol|brush border|cell-cell junction|focal adhesion|protein transport|nuclear body|Z disc|vesicle transport along actin…	hsa04510,hsa04520,hsa04530,hsa04670,hsa04810,hsa05146,hsa05203,hsa05322	Focal adhesion|Adherens junction|Tight junction|Leukocyte transendothelial migration|Regulation of actin cytoskeleton|Amoebiasis|Viral carcinogenesis|Systemic lupus erythematosus
ACTR10	12.56	8.65832	7.74937	11.2267	11.9275	9.65545	0.161207	0.584066	GeneID:55860,Genbank:NM_018477.2,HGNC:HGNC:17372	actin related protein 10 homolog	GO:0005576,GO:0005829,GO:0005869,GO:0006888,GO:0007018,GO:0019886,GO:0035578,GO:0043312,GO:1904813	extracellular region|cytosol|dynactin complex|ER to Golgi vesicle-mediated transport|microtubule-based movement|antigen processing and presentation of exogenous peptide antigen via MHC class II|azurophil granule lumen|neutrophil degranulation|ficolin-1-rich granule lumen
ACTR1A	21.3913	16.9068	15.8332	18.5054	13.1785	16.2742	-0.144433	0.571676	GeneID:10121,Genbank:NM_005736.3,HGNC:HGNC:167,MIM:605143	ARP1 actin related protein 1 homolog A	GO:0005524,GO:0005737,GO:0005813,GO:0005869,GO:0043209,GO:0099738	ATP binding|cytoplasm|centrosome|dynactin complex|myelin sheath|cell cortex region
ACTR1B	14.2145	9.15053	9.93894	11.8812	10.6979	12.6135	0.12137	0.644949	GeneID:10120,Genbank:NM_005735.3,HGNC:HGNC:168,MIM:605144	ARP1 actin related protein 1 homolog B	GO:0005524,GO:0005576,GO:0005737,GO:0005813,GO:0005829,GO:0005869,GO:0015630,GO:0016020,GO:0019886,GO:0034774,GO:0043312,GO:0070062,GO:1904813	ATP binding|extracellular region|cytoplasm|centrosome|cytosol|dynactin complex|microtubule cytoskeleton|membrane|antigen processing and presentation of exogenous peptide antigen via MHC class II|secretory granule lumen|neutrophil degranulation|extracellular exosome|ficolin-1-rich granule lumen
ACTR2	57.3769	57.1943	43.6655	54.5989	36.0931	52.9767	-0.218893	0.465723	GeneID:10097,Genbank:NM_001005386.2,HGNC:HGNC:169,MIM:604221	ARP2 actin related protein 2 homolog	GO:0003779,GO:0005200,GO:0005524,GO:0005576,GO:0005737,GO:0005829,GO:0005885,GO:0005925,GO:0006928,GO:0007163,GO:0008306,GO:0008356,GO:0014069,GO:0015629,GO:0016020,GO:0016344,GO:0016482,GO:0030027,GO:0030478,GO:0033206,GO:0034314,GO:0035578,GO:0035902,GO:0035984,GO:0038096,GO:0043312,GO:0045471,GO:0048013,GO:0051653,GO:0060271,GO:0061003,GO:0061024,GO:0061825,GO:0070062,GO:0071346,GO:0071437,GO:…	actin binding|structural constituent of cytoskeleton|ATP binding|extracellular region|cytoplasm|cytosol|Arp2/3 protein complex|focal adhesion|movement of cell or subcellular component|establishment or maintenance of cell polarity|associative learning|asymmetric cell division|postsynaptic density|actin cytoskeleton|membrane|meiotic chromosome movement towards spindle pole|cytosolic transport|lamel…	hsa04530	Tight junction
ACTR3	22.2347	22.6512	18.8863	21.5408	16.2024	15.9163	-0.329342	0.198866	GeneID:10096,Genbank:NM_005721.4,HGNC:HGNC:170,MIM:604222	ARP3 actin related protein 3 homolog	GO:0003779,GO:0005524,GO:0005829,GO:0005885,GO:0034314,GO:0042995,GO:0060271	actin binding|ATP binding|cytosol|Arp2/3 protein complex|Arp2/3 complex-mediated actin nucleation|cell projection|cilium assembly	hsa04530	Tight junction
ACTR5	1.78004	1.58684	1.51727	1.90666	2.07616	1.55391	0.198485	0.557525	GeneID:79913,Genbank:NM_024855.3,HGNC:HGNC:14671	ARP5 actin related protein 5 homolog	GO:0005634,GO:0005654,GO:0005737,GO:0006302,GO:0006310,GO:0006351,GO:0006355,GO:0016579,GO:0031011,GO:0070914	nucleus|nucleoplasm|cytoplasm|double-strand break repair|DNA recombination|transcription, DNA-templated|regulation of transcription, DNA-templated|protein deubiquitination|Ino80 complex|UV-damage excision repair
ACTR6	3.81413	3.09128	2.82018	2.71228	2.61498	4.32861	-0.107097	0.764583	GeneID:64431,Genbank:NM_022496.4,HGNC:HGNC:24025	ARP6 actin related protein 6 homolog	GO:0005634,GO:0005737,GO:0005856,GO:0006338	nucleus|cytoplasm|cytoskeleton|chromatin remodeling
ACTR8	1.52833	1.94718	1.91685	1.58364	1.70549	1.75449	-0.114242	0.667935	GeneID:93973,Genbank:XM_011534249.3,HGNC:HGNC:14672	ARP8 actin related protein 8 homolog	GO:0005524,GO:0005634,GO:0005654,GO:0005813,GO:0006281,GO:0006310,GO:0006338,GO:0006351,GO:0006355,GO:0007049,GO:0016579,GO:0031011,GO:0051301	ATP binding|nucleus|nucleoplasm|centrosome|DNA repair|DNA recombination|chromatin remodeling|transcription, DNA-templated|regulation of transcription, DNA-templated|cell cycle|protein deubiquitination|Ino80 complex|cell division
ACVR1	3.46715	3.3853	3.86793	4.18864	4.23382	3.4502	0.162693	0.571497	GeneID:90,Genbank:XM_006712825.4,HGNC:HGNC:171,MIM:102576	activin A receptor type 1	GO:0000082,GO:0001569,GO:0001701,GO:0001702,GO:0001707,GO:0001755,GO:0002526,GO:0003143,GO:0003181,GO:0003183,GO:0003203,GO:0003274,GO:0003289,GO:0004672,GO:0004674,GO:0004675,GO:0004702,GO:0005025,GO:0005524,GO:0005887,GO:0006468,GO:0007179,GO:0007281,GO:0007368,GO:0009968,GO:0010862,GO:0016361,GO:0017046,GO:0018107,GO:0030278,GO:0030335,GO:0030501,GO:0030509,GO:0032924,GO:0032926,GO:0042803,GO:…	G1/S transition of mitotic cell cycle|branching involved in blood vessel morphogenesis|in utero embryonic development|gastrulation with mouth forming second|mesoderm formation|neural crest cell migration|acute inflammatory response|embryonic heart tube morphogenesis|atrioventricular valve morphogenesis|mitral valve morphogenesis|endocardial cushion morphogenesis|endocardial cushion fusion|atrial …	hsa04060,hsa04350,hsa04550,hsa05418	Cytokine-cytokine receptor interaction|TGF-beta signaling pathway|Signaling pathways regulating pluripotency of stem cells|Fluid shear stress and atherosclerosis
ACVR1B	4.25784	4.35416	3.0753	5.4711	4.3725	5.69092	0.424968	0.145053	GeneID:91,Genbank:NM_020328.3,HGNC:HGNC:172,MIM:601300	activin A receptor type 1B	GO:0000082,GO:0001701,GO:0001942,GO:0004674,GO:0004675,GO:0004702,GO:0005524,GO:0005829,GO:0005886,GO:0005887,GO:0006355,GO:0006468,GO:0007165,GO:0007178,GO:0007417,GO:0009986,GO:0010629,GO:0010862,GO:0016361,GO:0018107,GO:0030308,GO:0031625,GO:0032924,GO:0032927,GO:0034711,GO:0038092,GO:0043235,GO:0045648,GO:0045944,GO:0046332,GO:0046545,GO:0046777,GO:0046872,GO:0048179,GO:0048185,GO:0070062,GO:…	G1/S transition of mitotic cell cycle|in utero embryonic development|hair follicle development|protein serine/threonine kinase activity|transmembrane receptor protein serine/threonine kinase activity|signal transducer, downstream of receptor, with serine/threonine kinase activity|ATP binding|cytosol|plasma membrane|integral component of plasma membrane|regulation of transcription, DNA-templated|p…	hsa04060,hsa04350,hsa04550	Cytokine-cytokine receptor interaction|TGF-beta signaling pathway|Signaling pathways regulating pluripotency of stem cells
ACVR2A	3.10577	3.32888	3.09679	2.98214	2.78153	3.45845	-0.102962	0.713224	GeneID:92,Genbank:NM_001278579.1,HGNC:HGNC:173,MIM:102581	activin A receptor type 2A			hsa04060,hsa04350,hsa04550,hsa05418	Cytokine-cytokine receptor interaction|TGF-beta signaling pathway|Signaling pathways regulating pluripotency of stem cells|Fluid shear stress and atherosclerosis
ACVR2B	1.07273	1.15672	1.3833	0.837268	0.890606	1.08169	-0.399418	0.133117	GeneID:93,Genbank:NM_001106.3,HGNC:HGNC:174,MIM:602730	activin A receptor type 2B	GO:0000122,GO:0001702,GO:0001822,GO:0001946,GO:0001974,GO:0004674,GO:0004675,GO:0004702,GO:0004712,GO:0005524,GO:0005737,GO:0005886,GO:0005887,GO:0006355,GO:0007165,GO:0007178,GO:0007368,GO:0007498,GO:0007507,GO:0009749,GO:0009791,GO:0009952,GO:0019838,GO:0030073,GO:0030324,GO:0030501,GO:0030509,GO:0031016,GO:0032147,GO:0032924,GO:0032927,GO:0035265,GO:0042475,GO:0043234,GO:0043235,GO:0045669,GO:…	negative regulation of transcription from RNA polymerase II promoter|gastrulation with mouth forming second|kidney development|lymphangiogenesis|blood vessel remodeling|protein serine/threonine kinase activity|transmembrane receptor protein serine/threonine kinase activity|signal transducer, downstream of receptor, with serine/threonine kinase activity|protein serine/threonine/tyrosine kinase act…	hsa04060,hsa04350,hsa04550,hsa05418	Cytokine-cytokine receptor interaction|TGF-beta signaling pathway|Signaling pathways regulating pluripotency of stem cells|Fluid shear stress and atherosclerosis
ACVRL1	26.5437	24.6125	14.1367	19.1603	2.86384	3.78515	-1.84628	0.000154357	GeneID:94,Genbank:XM_005269235.2,HGNC:HGNC:175,MIM:601284	activin A receptor like type 1			hsa04060	Cytokine-cytokine receptor interaction
ACY1	3.64846	2.97704	3.44082	3.0447	4.73927	11.7783	0.180313	0.854542	GeneID:95,Genbank:NM_000666.2,HGNC:HGNC:177,MIM:104620	aminoacylase 1	GO:0004046,GO:0005829,GO:0006520,GO:0006805,GO:0008237,GO:0042802,GO:0046872,GO:0070062	aminoacylase activity|cytosol|cellular amino acid metabolic process|xenobiotic metabolic process|metallopeptidase activity|identical protein binding|metal ion binding|extracellular exosome	hsa00220	Arginine biosynthesis
ACYP1	2.39765	1.24802	0.991003	0.831109	1.78856	0.626482	-0.00729302	0.988217	GeneID:97,Genbank:NM_001302617.1,HGNC:HGNC:179,MIM:600875	acylphosphatase 1	GO:0003998,GO:0006796,GO:0070062	acylphosphatase activity|phosphate-containing compound metabolic process|extracellular exosome	hsa00620	Pyruvate metabolism
ADA	1.23924	1.21712	0.92536	1.11477	0.435303	1.43625	-0.337434	0.534872	GeneID:100,Genbank:NM_001322050.1,HGNC:HGNC:186,MIM:608958	adenosine deaminase			hsa00230,hsa05340	Purine metabolism|Primary immunodeficiency
ADA2	8.85411	12.11	10.7616	11.4223	3.70939	5.12368	-0.810189	0.059709	GeneID:51816,Genbank:NM_001282227.1,HGNC:HGNC:1839,MIM:607575	adenosine deaminase 2	GO:0004000,GO:0005576,GO:0005615,GO:0006154,GO:0007275,GO:0008083,GO:0008201,GO:0008270,GO:0031685,GO:0035578,GO:0042803,GO:0043103,GO:0043312,GO:0043394,GO:0044267,GO:0046103	adenosine deaminase activity|extracellular region|extracellular space|adenosine catabolic process|multicellular organism development|growth factor activity|heparin binding|zinc ion binding|adenosine receptor binding|azurophil granule lumen|protein homodimerization activity|hypoxanthine salvage|neutrophil degranulation|proteoglycan binding|cellular protein metabolic process|inosine biosynthetic pr…	hsa00230	Purine metabolism
ADAM10	19.2726	19.8911	17.7498	18.0679	10.8487	18.5447	-0.313769	0.293832	GeneID:102,Genbank:NM_001320570.1,HGNC:HGNC:188,MIM:602192	ADAM metallopeptidase domain 10			hsa05010,hsa05120	Alzheimer disease|Epithelial cell signaling in Helicobacter pylori infection
ADAM15	12.1213	12.9596	13.2119	13.5023	24.058	22.7149	0.641762	0.0178623	GeneID:8751,Genbank:NM_001261464.1,HGNC:HGNC:193,MIM:605548	ADAM metallopeptidase domain 15	GO:0001525,GO:0001669,GO:0001953,GO:0002418,GO:0004222,GO:0005178,GO:0005886,GO:0005912,GO:0007160,GO:0007229,GO:0008237,GO:0008584,GO:0009986,GO:0016021,GO:0017124,GO:0022617,GO:0030198,GO:0030308,GO:0030336,GO:0030574,GO:0042246,GO:0042995,GO:0045087,GO:0046872,GO:0060317,GO:0070062,GO:0070528,GO:1900121	angiogenesis|acrosomal vesicle|negative regulation of cell-matrix adhesion|immune response to tumor cell|metalloendopeptidase activity|integrin binding|plasma membrane|adherens junction|cell-matrix adhesion|integrin-mediated signaling pathway|metallopeptidase activity|male gonad development|cell surface|integral component of membrane|SH3 domain binding|extracellular matrix disassembly|extracellul…
ADAM17	8.3463	7.11707	5.55002	6.78894	3.43499	4.64609	-0.566685	0.0555852	GeneID:6868,Genbank:NM_003183.5,HGNC:HGNC:195,MIM:603639	ADAM metallopeptidase domain 17			hsa04330,hsa05010,hsa05120	Notch signaling pathway|Alzheimer disease|Epithelial cell signaling in Helicobacter pylori infection
ADAM19	1.53409	1.5298	1.77796	2.02994	0.873695	0.588089	-0.703921	0.110176	GeneID:8728,Genbank:NM_033274.4,HGNC:HGNC:197,MIM:603640	ADAM metallopeptidase domain 19	GO:0004222,GO:0005794,GO:0005886,GO:0006509,GO:0007507,GO:0016021,GO:0017124,GO:0030198,GO:0046872	metalloendopeptidase activity|Golgi apparatus|plasma membrane|membrane protein ectodomain proteolysis|heart development|integral component of membrane|SH3 domain binding|extracellular matrix organization|metal ion binding
ADAM33	1.13082	0.90796	1.10056	1.18412	0.211092	0.222064	-1.5365	0.0098392	GeneID:80332,Genbank:NM_153202.3,HGNC:HGNC:15478,MIM:607114	ADAM metallopeptidase domain 33
ADAM8	3.23992	3.60745	4.05819	3.83201	5.30617	10.3372	0.843388	0.00318245	GeneID:101,Genbank:NM_001164490.1,HGNC:HGNC:215,MIM:602267	ADAM metallopeptidase domain 8	GO:0000902,GO:0001525,GO:0002102,GO:0002523,GO:0002675,GO:0004222,GO:0004252,GO:0005509,GO:0005737,GO:0005886,GO:0005887,GO:0006954,GO:0008237,GO:0008270,GO:0009986,GO:0010954,GO:0022407,GO:0022617,GO:0032010,GO:0032127,GO:0033089,GO:0035579,GO:0042581,GO:0043312,GO:0043406,GO:0043524,GO:0043621,GO:0045089,GO:0045780,GO:0045785,GO:0048247,GO:0050714,GO:0050839,GO:0051044,GO:0051092,GO:0051897,GO:…	cell morphogenesis|angiogenesis|podosome|leukocyte migration involved in inflammatory response|positive regulation of acute inflammatory response|metalloendopeptidase activity|serine-type endopeptidase activity|calcium ion binding|cytoplasm|plasma membrane|integral component of plasma membrane|inflammatory response|metallopeptidase activity|zinc ion binding|cell surface|positive regulation of pro…
ADAM9	19.5729	18.7902	21.1732	21.8307	22.7237	25.0964	0.188804	0.448233	GeneID:8754,Genbank:NM_003816.2,HGNC:HGNC:216,MIM:602713	ADAM metallopeptidase domain 9
ADAMTS1	12.9089	14.7774	16.0611	9.60438	6.09895	8.16985	-0.949732	0.00193391	GeneID:9510,Genbank:NM_006988.4,HGNC:HGNC:217,MIM:605174	ADAM metallopeptidase with thrombospondin type 1 motif 1
ADAMTS10	1.6981	1.7685	1.71653	1.9629	0.639688	0.437912	-1.16311	0.0262803	GeneID:81794,Genbank:NM_030957.3,HGNC:HGNC:13201,MIM:608990	ADAM metallopeptidase with thrombospondin type 1 motif 10	GO:0001527,GO:0004222,GO:0005578,GO:0031012,GO:0046872	microfibril|metalloendopeptidase activity|proteinaceous extracellular matrix|extracellular matrix|metal ion binding
ADAMTS15	2.43213	0.912311	0.869032	1.70274	0.432231	0.366203	-0.936914	0.0134503	GeneID:170689,Genbank:NM_139055.3,HGNC:HGNC:16305,MIM:607509	ADAM metallopeptidase with thrombospondin type 1 motif 15	GO:0004222,GO:0005578,GO:0005615,GO:0008201,GO:0008270,GO:0009986,GO:0050840	metalloendopeptidase activity|proteinaceous extracellular matrix|extracellular space|heparin binding|zinc ion binding|cell surface|extracellular matrix binding
ADAMTS2	1.82918	1.91843	2.52306	1.67227	1.03107	1.9954	-0.464852	0.158517	GeneID:9509,Genbank:NM_014244.4,HGNC:HGNC:218,MIM:604539	ADAM metallopeptidase with thrombospondin type 1 motif 2	GO:0004222,GO:0005576,GO:0005578,GO:0005615,GO:0007283,GO:0008237,GO:0008270,GO:0016485,GO:0030199,GO:0030324,GO:0030574,GO:0043588	metalloendopeptidase activity|extracellular region|proteinaceous extracellular matrix|extracellular space|spermatogenesis|metallopeptidase activity|zinc ion binding|protein processing|collagen fibril organization|lung development|collagen catabolic process|skin development
ADAMTS4	0.389988	2.58339	2.68485	0.226252	0.392101	0.30107	-2.17211	0.000116112	GeneID:9507,Genbank:NM_001320336.1,HGNC:HGNC:220,MIM:603876	ADAM metallopeptidase with thrombospondin type 1 motif 4	GO:0001501,GO:0002020,GO:0004222,GO:0005576,GO:0005578,GO:0005615,GO:0006508,GO:0008233,GO:0008237,GO:0016607,GO:0022617,GO:0031012,GO:0046872	skeletal system development|protease binding|metalloendopeptidase activity|extracellular region|proteinaceous extracellular matrix|extracellular space|proteolysis|peptidase activity|metallopeptidase activity|nuclear speck|extracellular matrix disassembly|extracellular matrix|metal ion binding
ADAMTS5	0.727804	0.64107	1.04907	0.721995	0.453472	0.237143	-0.949368	0.0588647	GeneID:11096,Genbank:NM_007038.4,HGNC:HGNC:221,MIM:605007	ADAM metallopeptidase with thrombospondin type 1 motif 5	GO:0004222,GO:0005178,GO:0005576,GO:0005578,GO:0005615,GO:0005788,GO:0006508,GO:0008201,GO:0008237,GO:0008270,GO:0022617,GO:0036066,GO:0042742,GO:0044691,GO:0050840	metalloendopeptidase activity|integrin binding|extracellular region|proteinaceous extracellular matrix|extracellular space|endoplasmic reticulum lumen|proteolysis|heparin binding|metallopeptidase activity|zinc ion binding|extracellular matrix disassembly|protein O-linked fucosylation|defense response to bacterium|tooth eruption|extracellular matrix binding
ADAMTS7	1.50061	0.889601	0.964545	1.45771	0.287819	0.375222	-0.895553	0.0447073	GeneID:11173,Genbank:XM_005254137.4,HGNC:HGNC:223,MIM:605009	ADAM metallopeptidase with thrombospondin type 1 motif 7	GO:0004222,GO:0005578,GO:0005615,GO:0005788,GO:0008237,GO:0009986,GO:0032331,GO:0036066,GO:0046872,GO:0051603,GO:0071347,GO:0071356,GO:0071773	metalloendopeptidase activity|proteinaceous extracellular matrix|extracellular space|endoplasmic reticulum lumen|metallopeptidase activity|cell surface|negative regulation of chondrocyte differentiation|protein O-linked fucosylation|metal ion binding|proteolysis involved in cellular protein catabolic process|cellular response to interleukin-1|cellular response to tumor necrosis factor|cellular re…
ADAMTS8	7.62117	9.97448	7.17197	6.45996	2.33845	1.48418	-1.57538	0.000960231	GeneID:11095,Genbank:NM_007037.5,HGNC:HGNC:224,MIM:605175	ADAM metallopeptidase with thrombospondin type 1 motif 8	GO:0004222,GO:0005178,GO:0005578,GO:0008201,GO:0008237,GO:0008270,GO:0008285,GO:0009673	metalloendopeptidase activity|integrin binding|proteinaceous extracellular matrix|heparin binding|metallopeptidase activity|zinc ion binding|negative regulation of cell proliferation|low-affinity phosphate transmembrane transporter activity
ADAMTS9	1.35067	1.3054	1.6928	1.39496	0.558117	1.47825	-0.498009	0.175565	GeneID:56999,Genbank:NM_001318781.1,HGNC:HGNC:13202,MIM:605421	ADAM metallopeptidase with thrombospondin type 1 motif 9	GO:0003179,GO:0003229,GO:0004222,GO:0005578,GO:0005615,GO:0005783,GO:0006508,GO:0006516,GO:0007275,GO:0008237,GO:0008270,GO:0009986,GO:0010596,GO:0015031,GO:0016192,GO:0030198,GO:0035909,GO:0043231,GO:0045636,GO:0090673,GO:1903671	heart valve morphogenesis|ventricular cardiac muscle tissue development|metalloendopeptidase activity|proteinaceous extracellular matrix|extracellular space|endoplasmic reticulum|proteolysis|glycoprotein catabolic process|multicellular organism development|metallopeptidase activity|zinc ion binding|cell surface|negative regulation of endothelial cell migration|protein transport|vesicle-mediated t…
ADAMTSL2	3.0097	3.19081	4.73421	4.05817	4.93107	2.94696	0.2009	0.621404	GeneID:9719,Genbank:NM_001145320.1,HGNC:HGNC:14631,MIM:612277	ADAMTS like 2	GO:0005578,GO:0008233,GO:0030198,GO:0030512,GO:0050436,GO:0060481	proteinaceous extracellular matrix|peptidase activity|extracellular matrix organization|negative regulation of transforming growth factor beta receptor signaling pathway|microfibril binding|lobar bronchus epithelium development
ADAMTSL3	2.33502	2.27619	2.64892	2.09208	0.950889	0.747977	-1.09785	0.00455116	GeneID:57188,Genbank:NM_001301110.1,HGNC:HGNC:14633,MIM:609199	ADAMTS like 3	GO:0005578,GO:0008233,GO:0043231	proteinaceous extracellular matrix|peptidase activity|intracellular membrane-bounded organelle
ADAMTSL4	8.61914	8.22039	6.83785	9.23786	2.49417	6.67467	-0.506048	0.223521	GeneID:54507,Genbank:NM_001288608.1,HGNC:HGNC:19706,MIM:610113	ADAMTS like 4	GO:0002020,GO:0002064,GO:0005614,GO:0005615,GO:0005788,GO:0006915,GO:0008233,GO:0030198,GO:0036066,GO:0043065	protease binding|epithelial cell development|interstitial matrix|extracellular space|endoplasmic reticulum lumen|apoptotic process|peptidase activity|extracellular matrix organization|protein O-linked fucosylation|positive regulation of apoptotic process
ADAP1	2.75984	4.35952	1.73981	2.70648	2.93216	3.68445	0.260184	0.483547	GeneID:11033,Genbank:NM_001284308.1,HGNC:HGNC:16486,MIM:608114	ArfGAP with dual PH domains 1	GO:0005096,GO:0005547,GO:0005634,GO:0005737,GO:0005829,GO:0005886,GO:0007166,GO:0043087,GO:0043533,GO:0046872	GTPase activator activity|phosphatidylinositol-3,4,5-trisphosphate binding|nucleus|cytoplasm|cytosol|plasma membrane|cell surface receptor signaling pathway|regulation of GTPase activity|inositol 1,3,4,5 tetrakisphosphate binding|metal ion binding
ADAP2	1.84726	3.22457	2.97198	2.45062	2.35848	2.72295	0.0141592	0.966329	GeneID:55803,Genbank:NM_001346712.1,HGNC:HGNC:16487,MIM:608635	ArfGAP with dual PH domains 2	GO:0005096,GO:0005546,GO:0005547,GO:0005737,GO:0005740,GO:0005886,GO:0007507,GO:0030674,GO:0043325,GO:0043533,GO:0046872	GTPase activator activity|phosphatidylinositol-4,5-bisphosphate binding|phosphatidylinositol-3,4,5-trisphosphate binding|cytoplasm|mitochondrial envelope|plasma membrane|heart development|protein binding, bridging|phosphatidylinositol-3,4-bisphosphate binding|inositol 1,3,4,5 tetrakisphosphate binding|metal ion binding
ADAR	17.8451	30.3198	16.1139	17.6557	28.615	27.1305	0.212992	0.456997	GeneID:103,Genbank:NM_001025107.2,HGNC:HGNC:225,MIM:146920	adenosine deaminase, RNA specific	GO:0001649,GO:0001701,GO:0002244,GO:0002566,GO:0003677,GO:0003723,GO:0003726,GO:0005634,GO:0005654,GO:0005730,GO:0005737,GO:0006382,GO:0006397,GO:0006606,GO:0006611,GO:0009615,GO:0016020,GO:0016553,GO:0030218,GO:0031054,GO:0035280,GO:0035455,GO:0043066,GO:0044387,GO:0044530,GO:0045070,GO:0045071,GO:0045087,GO:0046872,GO:0051607,GO:0060216,GO:0060337,GO:0060339,GO:0061484,GO:0098586,GO:1900369	osteoblast differentiation|in utero embryonic development|hematopoietic progenitor cell differentiation|somatic diversification of immune receptors via somatic mutation|DNA binding|RNA binding|double-stranded RNA adenosine deaminase activity|nucleus|nucleoplasm|nucleolus|cytoplasm|adenosine to inosine editing|mRNA processing|protein import into nucleus|protein export from nucleus|response to viru…	hsa04623,hsa05162,hsa05164	Cytosolic DNA-sensing pathway|Measles|Influenza A
ADARB1	5.35534	4.82667	4.93923	4.23814	1.54863	1.30728	-1.32706	0.000548856	GeneID:104,Genbank:NM_015833.3,HGNC:HGNC:226,MIM:601218	adenosine deaminase, RNA specific B1	GO:0003723,GO:0003725,GO:0003726,GO:0003729,GO:0005634,GO:0005654,GO:0005730,GO:0005829,GO:0006382,GO:0006396,GO:0006397,GO:0007274,GO:0008285,GO:0016553,GO:0021610,GO:0021618,GO:0021965,GO:0030336,GO:0035264,GO:0044387,GO:0045070,GO:0045087,GO:0046872,GO:0050884,GO:0051607,GO:0051726,GO:0060384,GO:0060415,GO:0061744,GO:0097049	RNA binding|double-stranded RNA binding|double-stranded RNA adenosine deaminase activity|mRNA binding|nucleus|nucleoplasm|nucleolus|cytosol|adenosine to inosine editing|RNA processing|mRNA processing|neuromuscular synaptic transmission|negative regulation of cell proliferation|base conversion or substitution editing|facial nerve morphogenesis|hypoglossal nerve morphogenesis|spinal cord ventral co…
ADAT1	2.56012	2.47343	2.73809	2.58238	3.98276	2.60261	0.18964	0.549663	GeneID:23536,Genbank:NM_001324448.1,HGNC:HGNC:228,MIM:604230	adenosine deaminase, tRNA specific 1	GO:0003723,GO:0008033,GO:0008251,GO:0046872	RNA binding|tRNA processing|tRNA-specific adenosine deaminase activity|metal ion binding
ADAT2	0.80377	0.898469	1.23448	0.923535	1.81619	0.561405	0.0515334	0.90809	GeneID:134637,Genbank:NM_182503.2,HGNC:HGNC:21172,MIM:615388	adenosine deaminase, tRNA specific 2	GO:0002100,GO:0005654,GO:0006400,GO:0008270,GO:0052717,GO:0052718	tRNA wobble adenosine to inosine editing|nucleoplasm|tRNA modification|zinc ion binding|tRNA-specific adenosine-34 deaminase activity|tRNA-specific adenosine-34 deaminase complex
ADAT3	2.6784	1.5966	2.03468	1.76478	1.37826	1.47149	-0.292411	0.509633	GeneID:113179,Genbank:NM_138422.3,HGNC:HGNC:25151,MIM:615302	adenosine deaminase, tRNA specific 3	GO:0003824,GO:0005654,GO:0006400,GO:0009451,GO:0046872	catalytic activity|nucleoplasm|tRNA modification|RNA modification|metal ion binding
ADCK2	6.77683	4.71796	4.85835	6.24876	5.87534	9.1252	0.399071	0.199761	GeneID:90956,Genbank:XM_006716170.4,HGNC:HGNC:19039	aarF domain containing kinase 2	GO:0004674,GO:0005524,GO:0016021	protein serine/threonine kinase activity|ATP binding|integral component of membrane
ADCK5	1.07286	0.81148	1.01794	1.32654	0.918781	1.44293	0.416348	0.221461	GeneID:203054,Genbank:XM_017013174.1,HGNC:HGNC:21738	aarF domain containing kinase 5	GO:0004674,GO:0016021	protein serine/threonine kinase activity|integral component of membrane
ADCY1	0.466737	0.367513	0.552686	0.263048	0.396812	1.95749	0.417613	0.396778	GeneID:107,Genbank:NM_001281768.1,HGNC:HGNC:232,MIM:103072	adenylate cyclase 1	GO:0003091,GO:0004016,GO:0004383,GO:0005516,GO:0005524,GO:0005634,GO:0005737,GO:0005886,GO:0005887,GO:0006171,GO:0006182,GO:0007165,GO:0007186,GO:0007189,GO:0007190,GO:0007193,GO:0007409,GO:0007420,GO:0007616,GO:0007623,GO:0008074,GO:0008294,GO:0010226,GO:0019933,GO:0034199,GO:0042752,GO:0045121,GO:0046872,GO:0070062,GO:0071277,GO:0071377,GO:1904322	renal water homeostasis|adenylate cyclase activity|guanylate cyclase activity|calmodulin binding|ATP binding|nucleus|cytoplasm|plasma membrane|integral component of plasma membrane|cAMP biosynthetic process|cGMP biosynthetic process|signal transduction|G-protein coupled receptor signaling pathway|adenylate cyclase-activating G-protein coupled receptor signaling pathway|activation of adenylate cyc…	hsa00230,hsa01522,hsa04015,hsa04020,hsa04022,hsa04024,hsa04062,hsa04072,hsa04114,hsa04211,hsa04213,hsa04261,hsa04270,hsa04371,hsa04540,hsa04611,hsa04713,hsa04714,hsa04720,hsa04723,hsa04724,hsa04725,hsa04727,hsa04750,hsa04911,hsa04912,hsa04913,hsa04914,hsa04915,hsa04916,hsa04918,hsa04921,hsa04923,hsa04925,hsa04926,hsa04927,hsa04928,hsa04934,hsa04970,hsa04971,hsa04972,hsa04976,hsa05032,hsa05142,hsa…	Purine metabolism|Endocrine resistance|Rap1 signaling pathway|Calcium signaling pathway|cGMP-PKG signaling pathway|cAMP signaling pathway|Chemokine signaling pathway|Phospholipase D signaling pathway|Oocyte meiosis|Longevity regulating pathway|Longevity regulating pathway - multiple species|Adrenergic signaling in cardiomyocytes|Vascular smooth muscle contraction|Apelin signaling pathway|Gap junc…
ADCY3	3.3235	3.41553	3.97736	4.34561	1.72088	2.80929	-0.305537	0.410955	GeneID:109,Genbank:NM_004036.4,HGNC:HGNC:234,MIM:600291	adenylate cyclase 3	GO:0003091,GO:0004016,GO:0004383,GO:0005516,GO:0005524,GO:0005737,GO:0005794,GO:0005886,GO:0005887,GO:0005929,GO:0006171,GO:0006182,GO:0007165,GO:0007186,GO:0007189,GO:0007190,GO:0007193,GO:0007338,GO:0007340,GO:0007608,GO:0008074,GO:0008355,GO:0016020,GO:0016021,GO:0030317,GO:0034199,GO:0046872,GO:0071377,GO:1904322	renal water homeostasis|adenylate cyclase activity|guanylate cyclase activity|calmodulin binding|ATP binding|cytoplasm|Golgi apparatus|plasma membrane|integral component of plasma membrane|cilium|cAMP biosynthetic process|cGMP biosynthetic process|signal transduction|G-protein coupled receptor signaling pathway|adenylate cyclase-activating G-protein coupled receptor signaling pathway|activation o…	hsa00230,hsa01522,hsa04015,hsa04020,hsa04022,hsa04024,hsa04062,hsa04072,hsa04114,hsa04211,hsa04213,hsa04261,hsa04270,hsa04371,hsa04540,hsa04611,hsa04713,hsa04714,hsa04723,hsa04724,hsa04725,hsa04727,hsa04740,hsa04750,hsa04911,hsa04912,hsa04913,hsa04914,hsa04915,hsa04916,hsa04918,hsa04921,hsa04923,hsa04925,hsa04926,hsa04927,hsa04928,hsa04934,hsa04962,hsa04970,hsa04971,hsa04972,hsa04976,hsa05032,hsa…	Purine metabolism|Endocrine resistance|Rap1 signaling pathway|Calcium signaling pathway|cGMP-PKG signaling pathway|cAMP signaling pathway|Chemokine signaling pathway|Phospholipase D signaling pathway|Oocyte meiosis|Longevity regulating pathway|Longevity regulating pathway - multiple species|Adrenergic signaling in cardiomyocytes|Vascular smooth muscle contraction|Apelin signaling pathway|Gap junc…
ADCY4	5.71104	5.39576	5.50932	4.82104	0.765212	1.26452	-1.80561	0.000504223	GeneID:196883,Genbank:NM_139247.3,HGNC:HGNC:235,MIM:600292	adenylate cyclase 4	GO:0003091,GO:0004016,GO:0004383,GO:0005080,GO:0005524,GO:0005737,GO:0005886,GO:0006171,GO:0006182,GO:0007165,GO:0007186,GO:0007188,GO:0007189,GO:0007190,GO:0007193,GO:0008074,GO:0016020,GO:0016021,GO:0030425,GO:0034199,GO:0046872,GO:0071377	renal water homeostasis|adenylate cyclase activity|guanylate cyclase activity|protein kinase C binding|ATP binding|cytoplasm|plasma membrane|cAMP biosynthetic process|cGMP biosynthetic process|signal transduction|G-protein coupled receptor signaling pathway|adenylate cyclase-modulating G-protein coupled receptor signaling pathway|adenylate cyclase-activating G-protein coupled receptor signaling p…	hsa00230,hsa01522,hsa04015,hsa04020,hsa04022,hsa04024,hsa04062,hsa04072,hsa04114,hsa04211,hsa04213,hsa04261,hsa04270,hsa04371,hsa04540,hsa04611,hsa04713,hsa04714,hsa04723,hsa04724,hsa04725,hsa04727,hsa04742,hsa04750,hsa04911,hsa04912,hsa04913,hsa04914,hsa04915,hsa04916,hsa04918,hsa04921,hsa04923,hsa04925,hsa04926,hsa04927,hsa04928,hsa04934,hsa04970,hsa04971,hsa04972,hsa04976,hsa05032,hsa05163,hsa…	Purine metabolism|Endocrine resistance|Rap1 signaling pathway|Calcium signaling pathway|cGMP-PKG signaling pathway|cAMP signaling pathway|Chemokine signaling pathway|Phospholipase D signaling pathway|Oocyte meiosis|Longevity regulating pathway|Longevity regulating pathway - multiple species|Adrenergic signaling in cardiomyocytes|Vascular smooth muscle contraction|Apelin signaling pathway|Gap junc…
ADCY6	4.88676	4.14774	4.65423	4.64522	3.9671	7.23924	0.178608	0.52351	GeneID:112,Genbank:NM_015270.4,HGNC:HGNC:237,MIM:600294	adenylate cyclase 6	GO:0003091,GO:0004016,GO:0004383,GO:0005080,GO:0005524,GO:0005886,GO:0005929,GO:0006171,GO:0006182,GO:0007186,GO:0007189,GO:0007190,GO:0007193,GO:0007212,GO:0008074,GO:0010977,GO:0016020,GO:0016021,GO:0019901,GO:0031226,GO:0034199,GO:0035811,GO:0046872,GO:0071377,GO:0071380,GO:0071870,GO:0097746,GO:1904117,GO:1904322	renal water homeostasis|adenylate cyclase activity|guanylate cyclase activity|protein kinase C binding|ATP binding|plasma membrane|cilium|cAMP biosynthetic process|cGMP biosynthetic process|G-protein coupled receptor signaling pathway|adenylate cyclase-activating G-protein coupled receptor signaling pathway|activation of adenylate cyclase activity|adenylate cyclase-inhibiting G-protein coupled re…	hsa00230,hsa01522,hsa04015,hsa04022,hsa04024,hsa04062,hsa04072,hsa04114,hsa04211,hsa04213,hsa04261,hsa04270,hsa04371,hsa04540,hsa04611,hsa04713,hsa04714,hsa04723,hsa04724,hsa04725,hsa04727,hsa04742,hsa04750,hsa04911,hsa04912,hsa04913,hsa04914,hsa04915,hsa04916,hsa04918,hsa04921,hsa04923,hsa04924,hsa04925,hsa04926,hsa04927,hsa04928,hsa04934,hsa04961,hsa04962,hsa04970,hsa04971,hsa04972,hsa04976,hsa…	Purine metabolism|Endocrine resistance|Rap1 signaling pathway|cGMP-PKG signaling pathway|cAMP signaling pathway|Chemokine signaling pathway|Phospholipase D signaling pathway|Oocyte meiosis|Longevity regulating pathway|Longevity regulating pathway - multiple species|Adrenergic signaling in cardiomyocytes|Vascular smooth muscle contraction|Apelin signaling pathway|Gap junction|Platelet activation|C…
ADCY7	9.27331	12.7891	9.59095	9.38441	6.42839	6.30549	-0.519319	0.105788	GeneID:113,Genbank:XM_011522837.3,HGNC:HGNC:238,MIM:600385	adenylate cyclase 7	GO:0003091,GO:0004016,GO:0004383,GO:0005524,GO:0005886,GO:0006171,GO:0006182,GO:0007165,GO:0007186,GO:0007189,GO:0007190,GO:0007193,GO:0008074,GO:0016021,GO:0034199,GO:0046872,GO:0060135,GO:0071361,GO:0071377	renal water homeostasis|adenylate cyclase activity|guanylate cyclase activity|ATP binding|plasma membrane|cAMP biosynthetic process|cGMP biosynthetic process|signal transduction|G-protein coupled receptor signaling pathway|adenylate cyclase-activating G-protein coupled receptor signaling pathway|activation of adenylate cyclase activity|adenylate cyclase-inhibiting G-protein coupled receptor signa…	hsa00230,hsa01522,hsa04015,hsa04020,hsa04022,hsa04024,hsa04062,hsa04072,hsa04114,hsa04211,hsa04213,hsa04261,hsa04270,hsa04371,hsa04540,hsa04611,hsa04713,hsa04714,hsa04723,hsa04724,hsa04725,hsa04727,hsa04750,hsa04911,hsa04912,hsa04913,hsa04914,hsa04915,hsa04916,hsa04918,hsa04921,hsa04923,hsa04925,hsa04926,hsa04927,hsa04928,hsa04934,hsa04970,hsa04971,hsa04972,hsa04976,hsa05032,hsa05163,hsa05166,hsa…	Purine metabolism|Endocrine resistance|Rap1 signaling pathway|Calcium signaling pathway|cGMP-PKG signaling pathway|cAMP signaling pathway|Chemokine signaling pathway|Phospholipase D signaling pathway|Oocyte meiosis|Longevity regulating pathway|Longevity regulating pathway - multiple species|Adrenergic signaling in cardiomyocytes|Vascular smooth muscle contraction|Apelin signaling pathway|Gap junc…
ADCY9	10.7752	9.75405	10.6147	8.39771	13.0818	7.62016	-0.086875	0.785066	GeneID:115,Genbank:XM_011522353.2,HGNC:HGNC:240,MIM:603302	adenylate cyclase 9	GO:0003091,GO:0004016,GO:0004383,GO:0005524,GO:0005886,GO:0005887,GO:0006171,GO:0006182,GO:0007165,GO:0007186,GO:0007189,GO:0007190,GO:0007193,GO:0008074,GO:0016021,GO:0030424,GO:0030425,GO:0034199,GO:0046872,GO:0071377,GO:0071880	renal water homeostasis|adenylate cyclase activity|guanylate cyclase activity|ATP binding|plasma membrane|integral component of plasma membrane|cAMP biosynthetic process|cGMP biosynthetic process|signal transduction|G-protein coupled receptor signaling pathway|adenylate cyclase-activating G-protein coupled receptor signaling pathway|activation of adenylate cyclase activity|adenylate cyclase-inhib…	hsa00230,hsa01522,hsa04015,hsa04020,hsa04022,hsa04024,hsa04062,hsa04072,hsa04114,hsa04211,hsa04213,hsa04261,hsa04270,hsa04371,hsa04540,hsa04611,hsa04713,hsa04714,hsa04723,hsa04724,hsa04725,hsa04727,hsa04750,hsa04911,hsa04912,hsa04913,hsa04914,hsa04915,hsa04916,hsa04918,hsa04921,hsa04923,hsa04925,hsa04926,hsa04927,hsa04928,hsa04934,hsa04961,hsa04962,hsa04970,hsa04971,hsa04972,hsa04976,hsa05032,hsa…	Purine metabolism|Endocrine resistance|Rap1 signaling pathway|Calcium signaling pathway|cGMP-PKG signaling pathway|cAMP signaling pathway|Chemokine signaling pathway|Phospholipase D signaling pathway|Oocyte meiosis|Longevity regulating pathway|Longevity regulating pathway - multiple species|Adrenergic signaling in cardiomyocytes|Vascular smooth muscle contraction|Apelin signaling pathway|Gap junc…
ADCYAP1	0.915638	0	0.701439	1.55545	0.062739	0.654041	1.29069	0.0905263	GeneID:116,Genbank:XM_005258081.4,HGNC:HGNC:241,MIM:102980	adenylate cyclase activating polypeptide 1	GO:0001541,GO:0001662,GO:0001821,GO:0002865,GO:0002878,GO:0005057,GO:0005102,GO:0005184,GO:0005576,GO:0005615,GO:0005622,GO:0007186,GO:0007189,GO:0007190,GO:0007204,GO:0007218,GO:0007267,GO:0007565,GO:0008277,GO:0008284,GO:0010656,GO:0010976,GO:0016521,GO:0019233,GO:0019933,GO:0021983,GO:0030073,GO:0031175,GO:0031858,GO:0032755,GO:0032880,GO:0034260,GO:0042594,GO:0043195,GO:0043267,GO:0043547,GO:…	ovarian follicle development|behavioral fear response|histamine secretion|negative regulation of acute inflammatory response to antigenic stimulus|negative regulation of acute inflammatory response to non-antigenic stimulus|signal transducer activity, downstream of receptor|receptor binding|neuropeptide hormone activity|extracellular region|extracellular space|intracellular|G-protein coupled rece…	hsa04911,hsa04924	Insulin secretion|Renin secretion
ADD1	27.093	23.1379	20.7653	21.1028	18.961	21.0887	-0.188065	0.446495	GeneID:118,Genbank:NM_001354757.1,HGNC:HGNC:243,MIM:102680	adducin 1	GO:0000902,GO:0001701,GO:0003723,GO:0003779,GO:0005198,GO:0005516,GO:0005634,GO:0005654,GO:0005737,GO:0005829,GO:0005886,GO:0005913,GO:0005925,GO:0006884,GO:0008134,GO:0008290,GO:0016604,GO:0020027,GO:0030036,GO:0030218,GO:0030507,GO:0032092,GO:0035264,GO:0036498,GO:0042803,GO:0045296,GO:0046982,GO:0048873,GO:0051015,GO:0051016,GO:0051017,GO:0055085,GO:0071277,GO:1903142,GO:1903393	cell morphogenesis|in utero embryonic development|RNA binding|actin binding|structural molecule activity|calmodulin binding|nucleus|nucleoplasm|cytoplasm|cytosol|plasma membrane|cell-cell adherens junction|focal adhesion|cell volume homeostasis|transcription factor binding|F-actin capping protein complex|nuclear body|hemoglobin metabolic process|actin cytoskeleton organization|erythrocyte differe…
ADD3	11.4845	9.87934	11.8958	10.3918	7.39683	9.89088	-0.340639	0.174007	GeneID:120,Genbank:NM_001320591.1,HGNC:HGNC:245,MIM:601568	adducin 3
ADGRA2	6.40011	5.98012	7.63458	4.94913	2.80882	3.30908	-0.838632	0.0136088	GeneID:25960,Genbank:NM_032777.9,HGNC:HGNC:17849,MIM:606823	adhesion G protein-coupled receptor A2	GO:0002040,GO:0004930,GO:0005886,GO:0007166,GO:0007186,GO:0007417,GO:0009986,GO:0010595,GO:0016021,GO:0030175,GO:0043542,GO:0045765,GO:0050920,GO:0090210,GO:1900747	sprouting angiogenesis|G-protein coupled receptor activity|plasma membrane|cell surface receptor signaling pathway|G-protein coupled receptor signaling pathway|central nervous system development|cell surface|positive regulation of endothelial cell migration|integral component of membrane|filopodium|endothelial cell migration|regulation of angiogenesis|regulation of chemotaxis|regulation of establ…
ADGRA3	2.24153	1.39846	2.45832	1.75857	3.83763	6.68358	0.902086	0.0329177	GeneID:166647,Genbank:NM_145290.3,HGNC:HGNC:13839,MIM:612303	adhesion G protein-coupled receptor A3	GO:0004930,GO:0007166,GO:0007186,GO:0009897,GO:0016021	G-protein coupled receptor activity|cell surface receptor signaling pathway|G-protein coupled receptor signaling pathway|external side of plasma membrane|integral component of membrane
ADGRD1	4.22421	4.47296	4.51844	3.41885	3.54402	5.19205	-0.150178	0.558423	GeneID:283383,Genbank:NM_001330497.1,HGNC:HGNC:19893,MIM:613639	adhesion G protein-coupled receptor D1	GO:0004930,GO:0005622,GO:0005886,GO:0007166,GO:0007186,GO:0007189,GO:0016021	G-protein coupled receptor activity|intracellular|plasma membrane|cell surface receptor signaling pathway|G-protein coupled receptor signaling pathway|adenylate cyclase-activating G-protein coupled receptor signaling pathway|integral component of membrane
ADGRE1	1.09214	2.97718	0.486537	0.701451	0.500657	0.357703	-1.24675	0.0104488	GeneID:2015,Genbank:NM_001974.4,HGNC:HGNC:3336,MIM:600493	adhesion G protein-coupled receptor E1	GO:0002250,GO:0004930,GO:0005509,GO:0005887,GO:0007155,GO:0007166,GO:0007186,GO:0009897	adaptive immune response|G-protein coupled receptor activity|calcium ion binding|integral component of plasma membrane|cell adhesion|cell surface receptor signaling pathway|G-protein coupled receptor signaling pathway|external side of plasma membrane
ADGRE2	1.05947	2.34115	1.06314	1.24161	0.455732	0.59495	-0.99136	0.0442273	GeneID:30817,Genbank:NM_013447.3,HGNC:HGNC:3337,MIM:606100	adhesion G protein-coupled receptor E2	GO:0004930,GO:0005509,GO:0005886,GO:0006954,GO:0007155,GO:0007166,GO:0007186,GO:0016021,GO:0016477,GO:0031256,GO:0032587,GO:0035374,GO:0043304,GO:0071621	G-protein coupled receptor activity|calcium ion binding|plasma membrane|inflammatory response|cell adhesion|cell surface receptor signaling pathway|G-protein coupled receptor signaling pathway|integral component of membrane|cell migration|leading edge membrane|ruffle membrane|chondroitin sulfate binding|regulation of mast cell degranulation|granulocyte chemotaxis
ADGRE3	1.88704	2.04674	1.97844	0.786978	0.370541	0.383635	-2.04577	4.59747e-06	GeneID:84658,Genbank:NM_001289159.1,HGNC:HGNC:23647,MIM:606101	adhesion G protein-coupled receptor E3	GO:0004930,GO:0005509,GO:0005576,GO:0005886,GO:0007166,GO:0007186,GO:0016021,GO:0030667,GO:0043312,GO:0101003	G-protein coupled receptor activity|calcium ion binding|extracellular region|plasma membrane|cell surface receptor signaling pathway|G-protein coupled receptor signaling pathway|integral component of membrane|secretory granule membrane|neutrophil degranulation|ficolin-1-rich granule membrane
ADGRE5	43.1298	35.0917	23.985	34.3476	15.5509	10.922	-0.917089	0.00717056	GeneID:976,Genbank:NM_078481.3,HGNC:HGNC:1711,MIM:601211	adhesion G protein-coupled receptor E5
ADGRF1	0.949025	0.552219	0.49904	5.02265	3.46006	4.61832	2.76568	6.62398e-18	GeneID:266977,Genbank:NM_153840.3,HGNC:HGNC:18990,MIM:617430	adhesion G protein-coupled receptor F1	GO:0004930,GO:0005576,GO:0005622,GO:0005886,GO:0007166,GO:0007186,GO:0007189,GO:0007416,GO:0007613,GO:0016021,GO:0031175,GO:0032793	G-protein coupled receptor activity|extracellular region|intracellular|plasma membrane|cell surface receptor signaling pathway|G-protein coupled receptor signaling pathway|adenylate cyclase-activating G-protein coupled receptor signaling pathway|synapse assembly|memory|integral component of membrane|neuron projection development|positive regulation of CREB transcription factor activity
ADGRF5	51.7764	44.0162	44.4996	45.1165	44.6355	146.882	0.482122	0.231105	GeneID:221395,Genbank:NM_015234.4,HGNC:HGNC:19030	adhesion G protein-coupled receptor F5	GO:0004930,GO:0005886,GO:0006112,GO:0007166,GO:0007186,GO:0009986,GO:0016021,GO:0031410,GO:0042593,GO:0043031,GO:0043129,GO:0045177,GO:0045444,GO:0071073	G-protein coupled receptor activity|plasma membrane|energy reserve metabolic process|cell surface receptor signaling pathway|G-protein coupled receptor signaling pathway|cell surface|integral component of membrane|cytoplasmic vesicle|glucose homeostasis|negative regulation of macrophage activation|surfactant homeostasis|apical part of cell|fat cell differentiation|positive regulation of phospholi…
ADGRG1	6.41198	4.04831	3.63595	5.51184	5.51306	3.18448	0.122207	0.694837	GeneID:9289,Genbank:XM_006721340.3,HGNC:HGNC:4512,MIM:604110	adhesion G protein-coupled receptor G1	GO:0001525,GO:0004930,GO:0005518,GO:0005622,GO:0005887,GO:0007155,GO:0007166,GO:0007186,GO:0007266,GO:0007267,GO:0007420,GO:0008201,GO:0008285,GO:0010573,GO:0016021,GO:0016477,GO:0021796,GO:0021801,GO:0021819,GO:0035025,GO:0045121,GO:0045785,GO:0050840,GO:0070062,GO:0070528,GO:0072520,GO:0097451,GO:2000179,GO:2001223	angiogenesis|G-protein coupled receptor activity|collagen binding|intracellular|integral component of plasma membrane|cell adhesion|cell surface receptor signaling pathway|G-protein coupled receptor signaling pathway|Rho protein signal transduction|cell-cell signaling|brain development|heparin binding|negative regulation of cell proliferation|vascular endothelial growth factor production|integral…
ADGRG6	5.86978	7.32079	6.91199	6.41938	2.28083	1.38227	-1.40491	0.00223939	GeneID:57211,Genbank:NM_020455.5,HGNC:HGNC:13841,MIM:612243	adhesion G protein-coupled receptor G6	GO:0004930,GO:0005518,GO:0005622,GO:0005886,GO:0007005,GO:0007166,GO:0007186,GO:0007189,GO:0014037,GO:0016021,GO:0019933,GO:0022011,GO:0042552,GO:0043236,GO:0050840,GO:0060347	G-protein coupled receptor activity|collagen binding|intracellular|plasma membrane|mitochondrion organization|cell surface receptor signaling pathway|G-protein coupled receptor signaling pathway|adenylate cyclase-activating G-protein coupled receptor signaling pathway|Schwann cell differentiation|integral component of membrane|cAMP-mediated signaling|myelination in peripheral nervous system|myeli…
ADGRL1	3.53224	2.5101	2.88302	2.66647	1.18418	5.17398	-0.153401	0.684872	GeneID:22859,Genbank:XM_005259818.3,HGNC:HGNC:20973,MIM:616416	adhesion G protein-coupled receptor L1	GO:0004930,GO:0005622,GO:0005886,GO:0007157,GO:0007166,GO:0007186,GO:0016021,GO:0016524,GO:0030054,GO:0030246,GO:0030424,GO:0030426,GO:0035584,GO:0042734,GO:0043005,GO:0045202,GO:0050839,GO:0051965,GO:0090129	G-protein coupled receptor activity|intracellular|plasma membrane|heterophilic cell-cell adhesion via plasma membrane cell adhesion molecules|cell surface receptor signaling pathway|G-protein coupled receptor signaling pathway|integral component of membrane|latrotoxin receptor activity|cell junction|carbohydrate binding|axon|growth cone|calcium-mediated signaling using intracellular calcium sourc…
ADGRL2	11.701	14.8406	9.97169	10.3137	3.52788	3.34257	-1.31769	0.00104913	GeneID:23266,Genbank:XM_024454350.1,HGNC:HGNC:18582,MIM:607018	adhesion G protein-coupled receptor L2
ADGRL3	1.55481	0.662795	0.613722	1.3384	0.175063	0.123861	-1.58584	0.000490921	GeneID:23284,Genbank:NM_001322402.1,HGNC:HGNC:20974,MIM:616417	adhesion G protein-coupled receptor L3	GO:0001764,GO:0004930,GO:0005509,GO:0005887,GO:0005911,GO:0007166,GO:0007186,GO:0007416,GO:0016021,GO:0030246,GO:0030424,GO:0031987,GO:0042220,GO:0051965,GO:0098742	neuron migration|G-protein coupled receptor activity|calcium ion binding|integral component of plasma membrane|cell-cell junction|cell surface receptor signaling pathway|G-protein coupled receptor signaling pathway|synapse assembly|integral component of membrane|carbohydrate binding|axon|locomotion involved in locomotory behavior|response to cocaine|positive regulation of synapse assembly|cell-ce…
ADGRL4	6.73617	6.28126	6.53047	6.23733	1.69334	2.03615	-1.34095	0.000901049	GeneID:64123,Genbank:NM_022159.3,HGNC:HGNC:20822,MIM:616419	adhesion G protein-coupled receptor L4	GO:0004930,GO:0005509,GO:0005886,GO:0007166,GO:0007186,GO:0016021,GO:0031410,GO:0046983	G-protein coupled receptor activity|calcium ion binding|plasma membrane|cell surface receptor signaling pathway|G-protein coupled receptor signaling pathway|integral component of membrane|cytoplasmic vesicle|protein dimerization activity
ADGRV1	2.34953	2.1657	2.60125	2.14681	4.10637	1.90406	0.0602928	0.866929	GeneID:84059,Genbank:XM_017009967.1,HGNC:HGNC:17416,MIM:602851	adhesion G protein-coupled receptor V1	GO:0004930,GO:0005509,GO:0005737,GO:0005886,GO:0007166,GO:0007186,GO:0007399,GO:0007601,GO:0007605,GO:0009986,GO:0016020,GO:0016021,GO:0032420,GO:0043235,GO:0045202,GO:0045494,GO:0048496,GO:0050877,GO:0050953,GO:0070062,GO:0098609	G-protein coupled receptor activity|calcium ion binding|cytoplasm|plasma membrane|cell surface receptor signaling pathway|G-protein coupled receptor signaling pathway|nervous system development|visual perception|sensory perception of sound|cell surface|membrane|integral component of membrane|stereocilium|receptor complex|synapse|photoreceptor cell maintenance|maintenance of animal organ identity|…
ADH1B	62.0272	105.567	72.3846	49.8023	26.9239	19.1219	-1.44246	0.000175948	GeneID:125,Genbank:NM_000668.5,HGNC:HGNC:250,MIM:103720	alcohol dehydrogenase 1B (class I), beta polypeptide			hsa00010,hsa00071,hsa00350,hsa00830,hsa00980,hsa00982,hsa05204	Glycolysis / Gluconeogenesis|Fatty acid degradation|Tyrosine metabolism|Retinol metabolism|Metabolism of xenobiotics by cytochrome P450|Drug metabolism - cytochrome P450|Chemical carcinogenesis
ADH1C	2.96172	0.911729	2.28469	1.55074	2.75083	18.1351	1.20267	0.0458513	GeneID:126,Genbank:NM_000669.4,HGNC:HGNC:251,MIM:103730	alcohol dehydrogenase 1C (class I), gamma polypeptide			hsa00010,hsa00071,hsa00350,hsa00830,hsa00980,hsa00982,hsa05204	Glycolysis / Gluconeogenesis|Fatty acid degradation|Tyrosine metabolism|Retinol metabolism|Metabolism of xenobiotics by cytochrome P450|Drug metabolism - cytochrome P450|Chemical carcinogenesis
ADH5	24.1692	19.8147	19.8234	22.6529	29.8305	30.2621	0.3432	0.249135	GeneID:128,Genbank:NM_000671.4,HGNC:HGNC:253,MIM:103710	alcohol dehydrogenase 5 (class III), chi polypeptide			hsa00010,hsa00071,hsa00350,hsa00830,hsa00980,hsa00982,hsa05204	Glycolysis / Gluconeogenesis|Fatty acid degradation|Tyrosine metabolism|Retinol metabolism|Metabolism of xenobiotics by cytochrome P450|Drug metabolism - cytochrome P450|Chemical carcinogenesis
ADHFE1	1.68748	1.82506	1.7357	1.56375	1.2259	1.42242	-0.241675	0.496727	GeneID:137872,Genbank:NM_144650.2,HGNC:HGNC:16354,MIM:611083	alcohol dehydrogenase, iron containing 1	GO:0004022,GO:0005739,GO:0005759,GO:0005829,GO:0006103,GO:0015993,GO:0046872,GO:0047988	alcohol dehydrogenase (NAD) activity|mitochondrion|mitochondrial matrix|cytosol|2-oxoglutarate metabolic process|molecular hydrogen transport|metal ion binding|hydroxyacid-oxoacid transhydrogenase activity
ADI1	6.92046	6.4588	5.57324	7.69376	10.6828	14.1815	0.750872	0.025633	GeneID:55256,Genbank:NM_018269.3,HGNC:HGNC:30576,MIM:613400	acireductone dioxygenase 1	GO:0005634,GO:0005737,GO:0005829,GO:0005886,GO:0010309,GO:0016491,GO:0019509,GO:0046872	nucleus|cytoplasm|cytosol|plasma membrane|acireductone dioxygenase [iron(II)-requiring] activity|oxidoreductase activity|L-methionine salvage from methylthioadenosine|metal ion binding	hsa00270	Cysteine and methionine metabolism
ADIPOR1	24.7132	23.0115	21.5201	24.5646	29.9973	47.6822	0.539406	0.0744242	GeneID:51094,Genbank:NM_001290629.1,HGNC:HGNC:24040,MIM:607945	adiponectin receptor 1			hsa04152,hsa04211,hsa04920,hsa04932	AMPK signaling pathway|Longevity regulating pathway|Adipocytokine signaling pathway|Non-alcoholic fatty liver disease (NAFLD)
ADIPOR2	20.5272	14.9564	9.99981	15.838	7.36788	8.79511	-0.557616	0.0561754	GeneID:79602,Genbank:XM_005253789.2,HGNC:HGNC:24041,MIM:607946	adiponectin receptor 2			hsa04152,hsa04211,hsa04920,hsa04932	AMPK signaling pathway|Longevity regulating pathway|Adipocytokine signaling pathway|Non-alcoholic fatty liver disease (NAFLD)
ADIRF	79.9535	54.0136	40.1594	52.5229	8.90065	6.79755	-1.8955	6.13833e-05	GeneID:10974,Genbank:NM_006829.2,HGNC:HGNC:24043	adipogenesis regulatory factor
ADK	3.05208	1.87162	2.99199	3.1586	3.68083	4.85768	0.483932	0.126259	GeneID:132,Genbank:NM_006721.3,HGNC:HGNC:257,MIM:102750	adenosine kinase	GO:0003723,GO:0004001,GO:0005524,GO:0005634,GO:0005654,GO:0005829,GO:0006169,GO:0006175,GO:0009156,GO:0043101,GO:0044209,GO:0046872	RNA binding|adenosine kinase activity|ATP binding|nucleus|nucleoplasm|cytosol|adenosine salvage|dATP biosynthetic process|ribonucleoside monophosphate biosynthetic process|purine-containing compound salvage|AMP salvage|metal ion binding	hsa00230	Purine metabolism
ADM	5.65436	2.78497	4.06911	3.96514	0.486166	1.16795	-1.63106	0.00193718	GeneID:133,Genbank:NM_001124.2,HGNC:HGNC:259,MIM:103275	adrenomedullin			hsa04270	Vascular smooth muscle contraction
ADM2	0.0969119	0.146157	0.219423	0.332511	1.49405	0.279799	2.4889	0.00327405	GeneID:79924,Genbank:NM_001253845.1,HGNC:HGNC:28898,MIM:608682	adrenomedullin 2	GO:0001525,GO:0005179,GO:0005576,GO:0005622,GO:0006468,GO:0007186,GO:0007189,GO:0007586,GO:0007631,GO:0010628,GO:0032403,GO:0045766,GO:0045776	angiogenesis|hormone activity|extracellular region|intracellular|protein phosphorylation|G-protein coupled receptor signaling pathway|adenylate cyclase-activating G-protein coupled receptor signaling pathway|digestion|feeding behavior|positive regulation of gene expression|protein complex binding|positive regulation of angiogenesis|negative regulation of blood pressure
ADNP	10.2923	10.4698	10.0137	9.54134	12.8455	13.6151	0.176724	0.51608	GeneID:23394,Genbank:NM_181442.3,HGNC:HGNC:15766,MIM:611386	activity dependent neuroprotector homeobox	GO:0003677,GO:0003682,GO:0005507,GO:0005615,GO:0005634,GO:0005737,GO:0006351,GO:0006355,GO:0007614,GO:0009743,GO:0010035,GO:0010629,GO:0010835,GO:0030424,GO:0030425,GO:0030828,GO:0031668,GO:0032091,GO:0032147,GO:0033484,GO:0042277,GO:0043025,GO:0043524,GO:0044849,GO:0045773,GO:0048487,GO:0050731,GO:0050805,GO:0051965	DNA binding|chromatin binding|copper ion binding|extracellular space|nucleus|cytoplasm|transcription, DNA-templated|regulation of transcription, DNA-templated|short-term memory|response to carbohydrate|response to inorganic substance|negative regulation of gene expression|regulation of protein ADP-ribosylation|axon|dendrite|positive regulation of cGMP biosynthetic process|cellular response to ext…
ADNP2	4.79265	4.4707	3.77915	4.05992	3.95111	6.33713	0.101932	0.748562	GeneID:22850,Genbank:NM_014913.3,HGNC:HGNC:23803,MIM:617422	ADNP homeobox 2	GO:0003677,GO:0005634,GO:0006351,GO:0006355,GO:0030182,GO:0030307,GO:0034599,GO:0046872,GO:0060548,GO:0071300	DNA binding|nucleus|transcription, DNA-templated|regulation of transcription, DNA-templated|neuron differentiation|positive regulation of cell growth|cellular response to oxidative stress|metal ion binding|negative regulation of cell death|cellular response to retinoic acid
ADO	6.28712	8.49089	6.37612	5.41955	6.058	8.88974	-0.106492	0.74009	GeneID:84890,Genbank:NM_032804.5,HGNC:HGNC:23506,MIM:611392	2-aminoethanethiol dioxygenase	GO:0000098,GO:0005739,GO:0005829,GO:0046872,GO:0047800,GO:0055114	sulfur amino acid catabolic process|mitochondrion|cytosol|metal ion binding|cysteamine dioxygenase activity|oxidation-reduction process	hsa00430	Taurine and hypotaurine metabolism
ADORA1	0.499575	0.586854	0.664962	1.79148	0.378125	15.9735	2.10849	0.00312828	GeneID:134,Genbank:XM_005244901.1,HGNC:HGNC:262,MIM:102775	adenosine A1 receptor	GO:0000186,GO:0001609,GO:0001659,GO:0001664,GO:0001666,GO:0001883,GO:0002087,GO:0002674,GO:0002686,GO:0002793,GO:0003093,GO:0004629,GO:0005783,GO:0005886,GO:0005887,GO:0006612,GO:0006909,GO:0006954,GO:0007165,GO:0007186,GO:0007193,GO:0007267,GO:0007399,GO:0008285,GO:0014050,GO:0014069,GO:0016042,GO:0016323,GO:0030673,GO:0031072,GO:0031683,GO:0032229,GO:0032244,GO:0032795,GO:0032900,GO:0035307,GO:…	activation of MAPKK activity|G-protein coupled adenosine receptor activity|temperature homeostasis|G-protein coupled receptor binding|response to hypoxia|purine nucleoside binding|regulation of respiratory gaseous exchange by neurological system process|negative regulation of acute inflammatory response|negative regulation of leukocyte migration|positive regulation of peptide secretion|regulation…	hsa04022,hsa04024,hsa04071,hsa04080,hsa04923,hsa04924,hsa05032	cGMP-PKG signaling pathway|cAMP signaling pathway|Sphingolipid signaling pathway|Neuroactive ligand-receptor interaction|Regulation of lipolysis in adipocytes|Renin secretion|Morphine addiction
ADORA2A	5.47414	1.88796	2.002	4.04946	2.03543	1.24644	-0.323978	0.34252	GeneID:135,Genbank:NM_001278500.1,HGNC:HGNC:263,MIM:102776	adenosine A2a receptor	GO:0001609,GO:0001963,GO:0001975,GO:0005882,GO:0005886,GO:0005887,GO:0006171,GO:0006355,GO:0006469,GO:0006909,GO:0006915,GO:0006954,GO:0006968,GO:0007186,GO:0007188,GO:0007189,GO:0007205,GO:0007267,GO:0007271,GO:0007417,GO:0007596,GO:0007600,GO:0007626,GO:0008015,GO:0008285,GO:0012505,GO:0014049,GO:0014057,GO:0014061,GO:0014069,GO:0016020,GO:0019899,GO:0030425,GO:0030673,GO:0031000,GO:0031802,GO:…	G-protein coupled adenosine receptor activity|synaptic transmission, dopaminergic|response to amphetamine|intermediate filament|plasma membrane|integral component of plasma membrane|cAMP biosynthetic process|regulation of transcription, DNA-templated|negative regulation of protein kinase activity|phagocytosis|apoptotic process|inflammatory response|cellular defense response|G-protein coupled rece…	hsa04015,hsa04020,hsa04024,hsa04080,hsa04270,hsa05012,hsa05034	Rap1 signaling pathway|Calcium signaling pathway|cAMP signaling pathway|Neuroactive ligand-receptor interaction|Vascular smooth muscle contraction|Parkinson disease|Alcoholism
ADORA2B	0.984726	0.238115	0.350535	1.11465	0.560508	1.85998	1.29439	0.00402677	GeneID:136,Genbank:XM_011523659.3,HGNC:HGNC:264,MIM:600446	adenosine A2b receptor	GO:0000187,GO:0001609,GO:0002882,GO:0005622,GO:0005886,GO:0005887,GO:0006968,GO:0007186,GO:0007189,GO:0007190,GO:0007254,GO:0007588,GO:0010575,GO:0031284,GO:0031668,GO:0032722,GO:0032755,GO:0043306,GO:0044267,GO:0060087	activation of MAPK activity|G-protein coupled adenosine receptor activity|positive regulation of chronic inflammatory response to non-antigenic stimulus|intracellular|plasma membrane|integral component of plasma membrane|cellular defense response|G-protein coupled receptor signaling pathway|adenylate cyclase-activating G-protein coupled receptor signaling pathway|activation of adenylate cyclase a…	hsa04015,hsa04020,hsa04080,hsa04270,hsa05034	Rap1 signaling pathway|Calcium signaling pathway|Neuroactive ligand-receptor interaction|Vascular smooth muscle contraction|Alcoholism
ADORA3	0.794698	1.0443	1.05642	1.18813	0.585042	0.738942	-0.194027	0.70615	GeneID:140,Genbank:NM_001302679.1,HGNC:HGNC:268,MIM:600445	adenosine A3 receptor	GO:0001609,GO:0005886,GO:0005887,GO:0006954,GO:0007165,GO:0007186,GO:0007190,GO:0008016,GO:0008285,GO:0009611,GO:0030336,GO:0032088	G-protein coupled adenosine receptor activity|plasma membrane|integral component of plasma membrane|inflammatory response|signal transduction|G-protein coupled receptor signaling pathway|activation of adenylate cyclase activity|regulation of heart contraction|negative regulation of cell proliferation|response to wounding|negative regulation of cell migration|negative regulation of NF-kappaB trans…	hsa04022,hsa04071,hsa04080	cGMP-PKG signaling pathway|Sphingolipid signaling pathway|Neuroactive ligand-receptor interaction
ADPGK	6.65351	6.77888	6.64788	8.17244	5.03866	6.47129	-0.0852287	0.764845	GeneID:83440,Genbank:NM_031284.4,HGNC:HGNC:25250,MIM:611861	ADP dependent glucokinase	GO:0005576,GO:0005783,GO:0005789,GO:0006006,GO:0016020,GO:0043843,GO:0046872,GO:0061621	extracellular region|endoplasmic reticulum|endoplasmic reticulum membrane|glucose metabolic process|membrane|ADP-specific glucokinase activity|metal ion binding|canonical glycolysis	hsa00010	Glycolysis / Gluconeogenesis
ADPRH	7.11032	5.96242	5.13886	6.10665	1.94834	2.73997	-0.954117	0.00991865	GeneID:141,Genbank:XM_011512438.2,HGNC:HGNC:269,MIM:603081	ADP-ribosylarginine hydrolase	GO:0000287,GO:0003875,GO:0005622,GO:0006464,GO:0030955,GO:0051725	magnesium ion binding|ADP-ribosylarginine hydrolase activity|intracellular|cellular protein modification process|potassium ion binding|protein de-ADP-ribosylation
ADPRHL1	0.52809	0.26613	0.237942	0.287957	1.09561	0.554111	0.919689	0.166387	GeneID:113622,Genbank:NM_138430.4,HGNC:HGNC:21303,MIM:610620	ADP-ribosylhydrolase like 1	GO:0000287,GO:0003875,GO:0005096,GO:0005622,GO:0006886,GO:0012505,GO:0017137,GO:0031338,GO:0051725,GO:0090630	magnesium ion binding|ADP-ribosylarginine hydrolase activity|GTPase activator activity|intracellular|intracellular protein transport|endomembrane system|Rab GTPase binding|regulation of vesicle fusion|protein de-ADP-ribosylation|activation of GTPase activity
ADPRHL2	11.2313	7.08233	5.42598	8.82256	14.5546	6.14207	0.296865	0.40343	GeneID:54936,Genbank:NM_017825.2,HGNC:HGNC:21304,MIM:610624	ADP-ribosylhydrolase like 2	GO:0004649,GO:0005654,GO:0005759,GO:0016604,GO:0046872,GO:0071451	poly(ADP-ribose) glycohydrolase activity|nucleoplasm|mitochondrial matrix|nuclear body|metal ion binding|cellular response to superoxide
ADPRM	2.42104	1.53425	2.12527	1.92842	0.938859	2.01899	-0.362294	0.351359	GeneID:56985,Genbank:NM_020233.4,HGNC:HGNC:30925	ADP-ribose/CDP-alcohol diphosphatase, manganese dependent	GO:0005829,GO:0034656,GO:0046872,GO:0047631,GO:0047734	cytosol|nucleobase-containing small molecule catabolic process|metal ion binding|ADP-ribose diphosphatase activity|CDP-glycerol diphosphatase activity	hsa00230,hsa00564	Purine metabolism|Glycerophospholipid metabolism
ADRA2A	1.4593	1.54584	2.35669	3.08438	1.42347	0.744529	-0.189678	0.74565	GeneID:150,Genbank:NM_000681.3,HGNC:HGNC:281,MIM:104210	adrenoceptor alpha 2A			hsa04022,hsa04080	cGMP-PKG signaling pathway|Neuroactive ligand-receptor interaction
ADRA2C	2.78691	1.26489	1.06465	1.51207	0.392634	0.419084	-1.2655	0.0237394	GeneID:152,Genbank:NM_000683.3,HGNC:HGNC:283,MIM:104250	adrenoceptor alpha 2C	GO:0004938,GO:0005737,GO:0005768,GO:0005886,GO:0005887,GO:0007186,GO:0007267,GO:0007565,GO:0010700,GO:0030168,GO:0030424,GO:0031694,GO:0032148,GO:0032811,GO:0035625,GO:0042803,GO:0043410,GO:0043679,GO:0045666,GO:0045907,GO:0046982,GO:0050796,GO:0051379,GO:0051930,GO:0070473,GO:0071875,GO:0071880	alpha2-adrenergic receptor activity|cytoplasm|endosome|plasma membrane|integral component of plasma membrane|G-protein coupled receptor signaling pathway|cell-cell signaling|female pregnancy|negative regulation of norepinephrine secretion|platelet activation|axon|alpha-2A adrenergic receptor binding|activation of protein kinase B activity|negative regulation of epinephrine secretion|epidermal gro…	hsa04022,hsa04080	cGMP-PKG signaling pathway|Neuroactive ligand-receptor interaction
ADRB1	26.6045	13.3331	9.26959	15.3774	6.56263	2.55842	-1.22294	0.000793883	GeneID:153,Genbank:NM_000684.2,HGNC:HGNC:285,MIM:109630	adrenoceptor beta 1			hsa04020,hsa04022,hsa04024,hsa04080,hsa04261,hsa04540,hsa04923,hsa04924,hsa04970,hsa05414	Calcium signaling pathway|cGMP-PKG signaling pathway|cAMP signaling pathway|Neuroactive ligand-receptor interaction|Adrenergic signaling in cardiomyocytes|Gap junction|Regulation of lipolysis in adipocytes|Renin secretion|Salivary secretion|Dilated cardiomyopathy (DCM)
ADRB2	20.4476	16.5267	11.4673	10.9376	5.97802	4.37363	-1.27197	2.07504e-05	GeneID:154,Genbank:NM_000024.5,HGNC:HGNC:286,MIM:109690	adrenoceptor beta 2			hsa04020,hsa04022,hsa04024,hsa04080,hsa04261,hsa04923,hsa04924,hsa04970	Calcium signaling pathway|cGMP-PKG signaling pathway|cAMP signaling pathway|Neuroactive ligand-receptor interaction|Adrenergic signaling in cardiomyocytes|Regulation of lipolysis in adipocytes|Renin secretion|Salivary secretion
ADRM1	8.9827	7.96346	5.90198	8.04644	9.10724	8.07166	0.264793	0.31117	GeneID:11047,Genbank:XM_017027602.1,HGNC:HGNC:15759,MIM:610650	adhesion regulating molecule 1	GO:0000502,GO:0002020,GO:0005654,GO:0005829,GO:0005886,GO:0005887,GO:0006368,GO:0006511,GO:0008541,GO:0016020,GO:0016579,GO:0043130,GO:0043248,GO:0061133,GO:0070628	proteasome complex|protease binding|nucleoplasm|cytosol|plasma membrane|integral component of plasma membrane|transcription elongation from RNA polymerase II promoter|ubiquitin-dependent protein catabolic process|proteasome regulatory particle, lid subcomplex|membrane|protein deubiquitination|ubiquitin binding|proteasome assembly|endopeptidase activator activity|proteasome binding	hsa03050,hsa05169	Proteasome|Epstein-Barr virus infection
ADSL	2.49826	2.56786	2.15208	2.95009	3.9104	2.88929	0.329695	0.247603	GeneID:158,Genbank:NM_000026.3,HGNC:HGNC:291,MIM:608222	adenylosuccinate lyase			hsa00230,hsa00250	Purine metabolism|Alanine, aspartate and glutamate metabolism
ADSS	6.6585	6.55251	6.26373	6.74508	7.63956	14.6373	0.416587	0.215552	GeneID:159,Genbank:NM_001126.3,HGNC:HGNC:292,MIM:103060	adenylosuccinate synthase	GO:0002376,GO:0004019,GO:0005525,GO:0005737,GO:0005829,GO:0005886,GO:0006167,GO:0006531,GO:0009168,GO:0014074,GO:0042301,GO:0044208,GO:0046040,GO:0046872,GO:0060359,GO:0070062,GO:0071257	immune system process|adenylosuccinate synthase activity|GTP binding|cytoplasm|cytosol|plasma membrane|AMP biosynthetic process|aspartate metabolic process|purine ribonucleoside monophosphate biosynthetic process|response to purine-containing compound|phosphate ion binding|'de novo' AMP biosynthetic process|IMP metabolic process|metal ion binding|response to ammonium ion|extracellular exosome|cel…	hsa00230,hsa00250	Purine metabolism|Alanine, aspartate and glutamate metabolism
AEBP1	14.5607	16.9689	30.1359	15.1021	19.1551	21.1356	-0.0127889	0.967882	GeneID:165,Genbank:XM_011515162.1,HGNC:HGNC:303,MIM:602981	AE binding protein 1	GO:0000122,GO:0000977,GO:0001227,GO:0001501,GO:0003700,GO:0003714,GO:0004180,GO:0004181,GO:0004185,GO:0005516,GO:0005576,GO:0005615,GO:0005634,GO:0005737,GO:0006351,GO:0006518,GO:0007517,GO:0008270,GO:0016485,GO:0070062	negative regulation of transcription from RNA polymerase II promoter|RNA polymerase II regulatory region sequence-specific DNA binding|transcriptional repressor activity, RNA polymerase II transcription regulatory region sequence-specific DNA binding|skeletal system development|DNA binding transcription factor activity|transcription corepressor activity|carboxypeptidase activity|metallocarboxypep…
AEBP2	5.12012	4.61619	4.94181	4.37101	3.82588	5.22651	-0.163821	0.537313	GeneID:121536,Genbank:XM_017018806.1,HGNC:HGNC:24051	AE binding protein 2	GO:0000978,GO:0001078,GO:0003714,GO:0005634,GO:0005654,GO:0006351,GO:0016569,GO:0035098,GO:0045814,GO:0046872	RNA polymerase II proximal promoter sequence-specific DNA binding|transcriptional repressor activity, RNA polymerase II proximal promoter sequence-specific DNA binding|transcription corepressor activity|nucleus|nucleoplasm|transcription, DNA-templated|covalent chromatin modification|ESC/E(Z) complex|negative regulation of gene expression, epigenetic|metal ion binding
AEN	2.23628	2.22186	1.85012	2.90043	1.5981	1.79934	-0.0244635	0.939402	GeneID:64782,Genbank:XM_011521905.2,HGNC:HGNC:25722,MIM:610177	apoptosis enhancing nuclease	GO:0003676,GO:0004527,GO:0005634,GO:0005654,GO:0005730,GO:0010212,GO:0031965,GO:0042771	nucleic acid binding|exonuclease activity|nucleus|nucleoplasm|nucleolus|response to ionizing radiation|nuclear membrane|intrinsic apoptotic signaling pathway in response to DNA damage by p53 class mediator
AES	81.4357	57.8834	50.9324	74.606	39.351	50.1363	-0.167255	0.537165	GeneID:166,Genbank:XM_006722664.1,HGNC:HGNC:307,MIM:600188	amino-terminal enhancer of split	GO:0000122,GO:0001501,GO:0003714,GO:0005634,GO:0006351,GO:0007275,GO:0009887,GO:0010629,GO:0016055,GO:0031668,GO:0032091,GO:0040008,GO:0045892,GO:0060761,GO:0070555,GO:0090090,GO:2000210	negative regulation of transcription from RNA polymerase II promoter|skeletal system development|transcription corepressor activity|nucleus|transcription, DNA-templated|multicellular organism development|animal organ morphogenesis|negative regulation of gene expression|Wnt signaling pathway|cellular response to extracellular stimulus|negative regulation of protein binding|regulation of growth|neg…
AFAP1	3.3081	3.89442	4.72014	2.6736	4.59792	3.85477	-0.0631465	0.825493	GeneID:60312,Genbank:NM_198595.2,HGNC:HGNC:24017,MIM:608252	actin filament associated protein 1	GO:0003779,GO:0005829,GO:0005925,GO:0009966,GO:0015629,GO:0051493	actin binding|cytosol|focal adhesion|regulation of signal transduction|actin cytoskeleton|regulation of cytoskeleton organization
AFAP1L1	3.4442	3.60892	2.47482	2.8375	0.658343	0.694271	-1.57033	0.000439017	GeneID:134265,Genbank:NM_152406.3,HGNC:HGNC:26714,MIM:614410	actin filament associated protein 1 like 1	GO:0002102,GO:0005737,GO:0030054,GO:0071437	podosome|cytoplasm|cell junction|invadopodium
AFAP1L2	1.26805	0.696467	1.11407	1.30666	1.42584	0.458462	-0.179537	0.718935	GeneID:84632,Genbank:XM_005270233.4,HGNC:HGNC:25901,MIM:612420	actin filament associated protein 1 like 2	GO:0005737,GO:0005829,GO:0005886,GO:0006954,GO:0007346,GO:0017124,GO:0030296,GO:0032675,GO:0032757,GO:0035591,GO:0042169,GO:0045742,GO:0045893	cytoplasm|cytosol|plasma membrane|inflammatory response|regulation of mitotic cell cycle|SH3 domain binding|protein tyrosine kinase activator activity|regulation of interleukin-6 production|positive regulation of interleukin-8 production|signaling adaptor activity|SH2 domain binding|positive regulation of epidermal growth factor receptor signaling pathway|positive regulation of transcription, DNA…
AFDN	17.5701	13.6268	13.2797	16.2139	12.0577	8.57699	-0.308438	0.269318	GeneID:4301,Genbank:XM_017010879.1,HGNC:HGNC:7137,MIM:159559	afadin, adherens junction formation factor			hsa04014,hsa04015,hsa04024,hsa04520,hsa04530,hsa04670	Ras signaling pathway|Rap1 signaling pathway|cAMP signaling pathway|Adherens junction|Tight junction|Leukocyte transendothelial migration
AFF1	14.2315	14.976	11.7335	11.7089	11.5331	13.6633	-0.137692	0.602834	GeneID:4299,Genbank:XM_005263009.4,HGNC:HGNC:7135,MIM:159557	AF4/FMR2 family member 1			hsa05202	Transcriptional misregulation in cancer
AFF3	1.98783	2.2419	1.57228	1.44792	1.00047	1.42319	-0.636523	0.0408978	GeneID:3899,Genbank:XM_011511171.3,HGNC:HGNC:6473,MIM:601464	AF4/FMR2 family member 3
AFF4	15.4697	13.9046	12.9091	12.9399	18.5275	15.7719	0.118089	0.678228	GeneID:27125,Genbank:NM_014423.3,HGNC:HGNC:17869,MIM:604417	AF4/FMR2 family member 4
AFG3L2	8.4466	7.11596	5.6796	6.87144	10.2763	7.4547	0.17409	0.562769	GeneID:10939,Genbank:XM_011525601.3,HGNC:HGNC:315,MIM:604581	AFG3 like matrix AAA peptidase subunit 2	GO:0004222,GO:0005524,GO:0005739,GO:0005743,GO:0005745,GO:0006508,GO:0006851,GO:0007409,GO:0007528,GO:0008053,GO:0008237,GO:0008270,GO:0016485,GO:0016540,GO:0021675,GO:0034982,GO:0036444,GO:0040014,GO:0042407,GO:0042552,GO:0048747,GO:0051082,GO:0051560,GO:0060013	metalloendopeptidase activity|ATP binding|mitochondrion|mitochondrial inner membrane|m-AAA complex|proteolysis|mitochondrial calcium ion transmembrane transport|axonogenesis|neuromuscular junction development|mitochondrial fusion|metallopeptidase activity|zinc ion binding|protein processing|protein autoprocessing|nerve development|mitochondrial protein processing|mitochondrial calcium uptake|regu…
AFMID	2.76228	1.93801	2.31773	2.99612	3.18528	2.28061	0.269986	0.406771	GeneID:125061,Genbank:XM_011524329.2,HGNC:HGNC:20910	arylformamidase	GO:0004061,GO:0005634,GO:0005737,GO:0005829,GO:0016787,GO:0019441	arylformamidase activity|nucleus|cytoplasm|cytosol|hydrolase activity|tryptophan catabolic process to kynurenine	hsa00380,hsa00630	Tryptophan metabolism|Glyoxylate and dicarboxylate metabolism
AFTPH	9.44723	9.46283	8.46704	8.78376	8.69059	12.7825	0.0981757	0.739529	GeneID:54812,Genbank:NM_203437.3,HGNC:HGNC:25951	aftiphilin	GO:0005634,GO:0005794,GO:0005829,GO:0015031,GO:0030121,GO:0030276,GO:0043231	nucleus|Golgi apparatus|cytosol|protein transport|AP-1 adaptor complex|clathrin binding|intracellular membrane-bounded organelle
AGA	3.50405	3.66618	3.78914	4.17583	6.64034	5.43367	0.538667	0.0874774	GeneID:175,Genbank:NM_001171988.1,HGNC:HGNC:318,MIM:613228	aspartylglucosaminidase	GO:0003948,GO:0005576,GO:0005615,GO:0005764,GO:0005783,GO:0006517,GO:0008233,GO:0035578,GO:0043312,GO:0043621,GO:0051604,GO:0070062	N4-(beta-N-acetylglucosaminyl)-L-asparaginase activity|extracellular region|extracellular space|lysosome|endoplasmic reticulum|protein deglycosylation|peptidase activity|azurophil granule lumen|neutrophil degranulation|protein self-association|protein maturation|extracellular exosome	hsa00511,hsa04142	Other glycan degradation|Lysosome
AGAP1	2.32828	1.92841	2.19005	1.99	2.26565	1.99975	0.0808617	0.776481	GeneID:116987,Genbank:NM_001037131.2,HGNC:HGNC:16922,MIM:608651	ArfGAP with GTPase domain, ankyrin repeat and PH domain 1	GO:0003924,GO:0005096,GO:0005525,GO:0005543,GO:0005737,GO:0015031,GO:0046872	GTPase activity|GTPase activator activity|GTP binding|phospholipid binding|cytoplasm|protein transport|metal ion binding	hsa04144	Endocytosis
AGAP11	1.45111	1.55026	1.02165	1.31416	0.254087	0.172707	-1.95359	0.000834721	GeneID:119385,Genbank:NM_133447.1,HGNC:HGNC:29421	ArfGAP with GTPase domain, ankyrin repeat and PH domain 11	GO:0005096,GO:0046872	GTPase activator activity|metal ion binding
AGAP2	0.935136	1.33353	1.24719	1.03022	0.608572	0.652032	-0.574481	0.151379	GeneID:116986,Genbank:XM_017018772.2,HGNC:HGNC:16921,MIM:605476	ArfGAP with GTPase domain, ankyrin repeat and PH domain 2			hsa04068,hsa04144	FoxO signaling pathway|Endocytosis
AGAP3	9.84194	9.1737	8.29409	8.72652	8.04062	12.2874	0.134265	0.619744	GeneID:116988,Genbank:NM_001350104.1,HGNC:HGNC:16923,MIM:616813	ArfGAP with GTPase domain, ankyrin repeat and PH domain 3	GO:0003924,GO:0005096,GO:0005525,GO:0005737,GO:0007165,GO:0016020,GO:0046872	GTPase activity|GTPase activator activity|GTP binding|cytoplasm|signal transduction|membrane|metal ion binding	hsa04144	Endocytosis
AGAP4	0.656132	0.809742	1.04331	0.856757	0.56431	0.593582	-0.328542	0.405498	GeneID:119016,Genbank:NM_001291379.1,HGNC:HGNC:23459	ArfGAP with GTPase domain, ankyrin repeat and PH domain 4	GO:0005096,GO:0046872	GTPase activator activity|metal ion binding
AGAP5	0.69277	0.780999	0.987992	0.865696	1.22904	1.46098	0.527393	0.140821	GeneID:729092,Genbank:NM_001144000.1,HGNC:HGNC:23467	ArfGAP with GTPase domain, ankyrin repeat and PH domain 5	GO:0005096,GO:0046872	GTPase activator activity|metal ion binding
AGAP6	1.05819	1.31119	1.37354	1.14693	1.06282	0.757374	-0.257944	0.468132	GeneID:414189,Genbank:XM_017016272.1,HGNC:HGNC:23466	ArfGAP with GTPase domain, ankyrin repeat and PH domain 6	GO:0005096,GO:0046872	GTPase activator activity|metal ion binding
AGBL5	2.98345	1.96614	2.16062	2.22067	2.73633	2.4801	0.126072	0.695517	GeneID:60509,Genbank:XM_011533011.3,HGNC:HGNC:26147,MIM:615900	ATP/GTP binding protein like 5	GO:0004181,GO:0005634,GO:0005737,GO:0005829,GO:0008270,GO:0015630,GO:0015631,GO:0030496,GO:0035608,GO:0035611,GO:0045171,GO:0051607,GO:0072686	metallocarboxypeptidase activity|nucleus|cytoplasm|cytosol|zinc ion binding|microtubule cytoskeleton|tubulin binding|midbody|protein deglutamylation|protein branching point deglutamylation|intercellular bridge|defense response to virus|mitotic spindle
AGER	237.864	164.67	104.953	144.755	14.4435	23.2021	-2.13611	8.08906e-06	GeneID:177,Genbank:NM_001206932.1,HGNC:HGNC:320,MIM:600214	advanced glycosylation end-product specific receptor			hsa04933	AGE-RAGE signaling pathway in diabetic complications
AGFG1	7.99395	8.03847	6.08405	7.03458	6.01101	5.94326	-0.283397	0.272913	GeneID:3267,Genbank:XM_006712480.3,HGNC:HGNC:5175,MIM:600862	ArfGAP with FG repeats 1	GO:0001675,GO:0003677,GO:0003723,GO:0005096,GO:0005643,GO:0005829,GO:0006406,GO:0007275,GO:0007289,GO:0031410,GO:0042995,GO:0043025,GO:0043231,GO:0045109,GO:0046872,GO:0061024	acrosome assembly|DNA binding|RNA binding|GTPase activator activity|nuclear pore|cytosol|mRNA export from nucleus|multicellular organism development|spermatid nucleus differentiation|cytoplasmic vesicle|cell projection|neuronal cell body|intracellular membrane-bounded organelle|intermediate filament organization|metal ion binding|membrane organization	hsa05164	Influenza A
AGFG2	2.76581	2.07941	2.14308	5.03135	3.55431	2.95778	0.744894	0.0137668	GeneID:3268,Genbank:NM_006076.4,HGNC:HGNC:5177,MIM:604019	ArfGAP with FG repeats 2	GO:0005096,GO:0016020,GO:0046872	GTPase activator activity|membrane|metal ion binding
AGGF1	5.82429	5.76616	5.72018	6.26276	9.26366	6.64759	0.289557	0.309663	GeneID:55109,Genbank:NM_018046.4,HGNC:HGNC:24684,MIM:608464	angiogenic factor with G-patch and FHA domains 1	GO:0001525,GO:0001570,GO:0001938,GO:0003676,GO:0005576,GO:0005737,GO:0007155,GO:0045766,GO:0048471	angiogenesis|vasculogenesis|positive regulation of endothelial cell proliferation|nucleic acid binding|extracellular region|cytoplasm|cell adhesion|positive regulation of angiogenesis|perinuclear region of cytoplasm
AGK	0.764713	0.734592	0.824443	0.879152	1.30399	1.3063	0.514971	0.0937297	GeneID:55750,Genbank:NM_018238.3,HGNC:HGNC:21869,MIM:610345	acylglycerol kinase	GO:0001729,GO:0003951,GO:0004143,GO:0005524,GO:0005739,GO:0005741,GO:0005743,GO:0005758,GO:0005829,GO:0031305,GO:0042721,GO:0043231,GO:0045039,GO:0046474,GO:0046513,GO:0047620	ceramide kinase activity|NAD+ kinase activity|diacylglycerol kinase activity|ATP binding|mitochondrion|mitochondrial outer membrane|mitochondrial inner membrane|mitochondrial intermembrane space|cytosol|integral component of mitochondrial inner membrane|mitochondrial inner membrane protein insertion complex|intracellular membrane-bounded organelle|protein import into mitochondrial inner membrane|…	hsa00561	Glycerolipid metabolism
AGL	3.29511	3.90239	3.46166	3.7079	7.56477	3.83961	0.365194	0.247863	GeneID:178,Genbank:XM_005270557.2,HGNC:HGNC:321,MIM:610860	amylo-alpha-1, 6-glucosidase, 4-alpha-glucanotransferase	GO:0004133,GO:0004134,GO:0004135,GO:0005576,GO:0005634,GO:0005737,GO:0005829,GO:0005978,GO:0005980,GO:0007584,GO:0016234,GO:0016529,GO:0030247,GO:0031593,GO:0034774,GO:0043033,GO:0043312,GO:0051384,GO:0102500,GO:1904813	glycogen debranching enzyme activity|4-alpha-glucanotransferase activity|amylo-alpha-1,6-glucosidase activity|extracellular region|nucleus|cytoplasm|cytosol|glycogen biosynthetic process|glycogen catabolic process|response to nutrient|inclusion body|sarcoplasmic reticulum|polysaccharide binding|polyubiquitin modification-dependent protein binding|secretory granule lumen|isoamylase complex|neutrop…	hsa00500	Starch and sucrose metabolism
AGO1	3.89927	4.19467	4.3204	3.32679	6.59596	4.46052	0.151679	0.624596	GeneID:26523,Genbank:NM_001317123.1,HGNC:HGNC:3262,MIM:606228	argonaute 1, RISC catalytic component	GO:0000932,GO:0000956,GO:0000978,GO:0000993,GO:0001047,GO:0003723,GO:0003725,GO:0003727,GO:0005634,GO:0005654,GO:0005737,GO:0005829,GO:0005844,GO:0006351,GO:0007223,GO:0010501,GO:0010586,GO:0016442,GO:0016525,GO:0030529,GO:0031054,GO:0035068,GO:0035194,GO:0035196,GO:0035198,GO:0035278,GO:0035280,GO:0045652,GO:0045944,GO:0060964,GO:0070578,GO:1901224	P-body|nuclear-transcribed mRNA catabolic process|RNA polymerase II proximal promoter sequence-specific DNA binding|RNA polymerase II core binding|core promoter binding|RNA binding|double-stranded RNA binding|single-stranded RNA binding|nucleus|nucleoplasm|cytoplasm|cytosol|polysome|transcription, DNA-templated|Wnt signaling pathway, calcium modulating pathway|RNA secondary structure unwinding|mi…
AGO2	5.26204	5.08906	4.71891	4.21811	2.61936	3.1949	-0.614473	0.0246924	GeneID:27161,Genbank:NM_001164623.2,HGNC:HGNC:3263,MIM:606229	argonaute 2, RISC catalytic component	GO:0000340,GO:0000932,GO:0000993,GO:0001047,GO:0003723,GO:0003725,GO:0003727,GO:0003743,GO:0004521,GO:0005634,GO:0005654,GO:0005737,GO:0005829,GO:0005844,GO:0005845,GO:0006351,GO:0006412,GO:0007223,GO:0008022,GO:0009791,GO:0010501,GO:0010586,GO:0016020,GO:0016442,GO:0030054,GO:0030422,GO:0030425,GO:0030529,GO:0031047,GO:0031054,GO:0035068,GO:0035087,GO:0035194,GO:0035196,GO:0035197,GO:0035198,GO:…	RNA 7-methylguanosine cap binding|P-body|RNA polymerase II core binding|core promoter binding|RNA binding|double-stranded RNA binding|single-stranded RNA binding|translation initiation factor activity|endoribonuclease activity|nucleus|nucleoplasm|cytoplasm|cytosol|polysome|mRNA cap binding complex|transcription, DNA-templated|translation|Wnt signaling pathway, calcium modulating pathway|protein C…
AGO3	1.20216	1.52051	1.50868	1.20998	2.585	1.49442	0.283133	0.368174	GeneID:192669,Genbank:XM_017000523.2,HGNC:HGNC:18421,MIM:607355	argonaute 3, RISC catalytic component	GO:0000794,GO:0000932,GO:0003723,GO:0003725,GO:0003727,GO:0005654,GO:0005737,GO:0005829,GO:0006402,GO:0007223,GO:0010501,GO:0010628,GO:0016020,GO:0016442,GO:0031054,GO:0035068,GO:0035194,GO:0035196,GO:0035198,GO:0035278,GO:0035280,GO:0036464,GO:0045652,GO:0070578,GO:0072091,GO:1901224	condensed nuclear chromosome|P-body|RNA binding|double-stranded RNA binding|single-stranded RNA binding|nucleoplasm|cytoplasm|cytosol|mRNA catabolic process|Wnt signaling pathway, calcium modulating pathway|RNA secondary structure unwinding|positive regulation of gene expression|membrane|RISC complex|pre-miRNA processing|micro-ribonucleoprotein complex|posttranscriptional gene silencing by RNA|pr…
AGO4	5.90581	5.61869	5.84205	4.56283	6.18467	3.5204	-0.312186	0.310026	GeneID:192670,Genbank:XM_005270578.3,HGNC:HGNC:18424,MIM:607356	argonaute 4, RISC catalytic component	GO:0000932,GO:0003725,GO:0003727,GO:0005654,GO:0005737,GO:0005829,GO:0006402,GO:0007130,GO:0007140,GO:0007223,GO:0008584,GO:0010501,GO:0010586,GO:0016020,GO:0016442,GO:0016604,GO:0022604,GO:0031054,GO:0035068,GO:0035194,GO:0035196,GO:0035198,GO:0035278,GO:0035280,GO:0043066,GO:0045652,GO:0070578	P-body|double-stranded RNA binding|single-stranded RNA binding|nucleoplasm|cytoplasm|cytosol|mRNA catabolic process|synaptonemal complex assembly|male meiotic nuclear division|Wnt signaling pathway, calcium modulating pathway|male gonad development|RNA secondary structure unwinding|miRNA metabolic process|membrane|RISC complex|nuclear body|regulation of cell morphogenesis|pre-miRNA processing|mic…
AGPAT1	6.32949	4.62063	5.26522	5.10192	7.85248	7.61519	0.349608	0.268709	GeneID:10554,Genbank:NM_032741.4,HGNC:HGNC:324,MIM:603099	1-acylglycerol-3-phosphate O-acyltransferase 1	GO:0001819,GO:0001961,GO:0003841,GO:0005783,GO:0005789,GO:0006644,GO:0006654,GO:0016020,GO:0016021,GO:0016024,GO:0031325	positive regulation of cytokine production|positive regulation of cytokine-mediated signaling pathway|1-acylglycerol-3-phosphate O-acyltransferase activity|endoplasmic reticulum|endoplasmic reticulum membrane|phospholipid metabolic process|phosphatidic acid biosynthetic process|membrane|integral component of membrane|CDP-diacylglycerol biosynthetic process|positive regulation of cellular metaboli…	hsa00561,hsa00564,hsa04072,hsa04975	Glycerolipid metabolism|Glycerophospholipid metabolism|Phospholipase D signaling pathway|Fat digestion and absorption
AGPAT2	22.095	17.0636	17.6121	23.9067	15.4976	31.0242	0.366956	0.204277	GeneID:10555,Genbank:NM_001012727.1,HGNC:HGNC:325,MIM:603100	1-acylglycerol-3-phosphate O-acyltransferase 2	GO:0001819,GO:0001961,GO:0003841,GO:0005783,GO:0005789,GO:0005886,GO:0006644,GO:0006654,GO:0008544,GO:0016021,GO:0016024,GO:0035579,GO:0042493,GO:0043312	positive regulation of cytokine production|positive regulation of cytokine-mediated signaling pathway|1-acylglycerol-3-phosphate O-acyltransferase activity|endoplasmic reticulum|endoplasmic reticulum membrane|plasma membrane|phospholipid metabolic process|phosphatidic acid biosynthetic process|epidermis development|integral component of membrane|CDP-diacylglycerol biosynthetic process|specific gr…	hsa00561,hsa00564,hsa04072,hsa04975	Glycerolipid metabolism|Glycerophospholipid metabolism|Phospholipase D signaling pathway|Fat digestion and absorption
AGPAT3	6.49399	6.92704	5.36654	5.60846	5.6761	5.99758	-0.0894251	0.725402	GeneID:56894,Genbank:XM_006724031.3,HGNC:HGNC:326,MIM:614794	1-acylglycerol-3-phosphate O-acyltransferase 3	GO:0000139,GO:0003841,GO:0005635,GO:0005783,GO:0005789,GO:0005886,GO:0006654,GO:0008654,GO:0016020,GO:0016021,GO:0016024	Golgi membrane|1-acylglycerol-3-phosphate O-acyltransferase activity|nuclear envelope|endoplasmic reticulum|endoplasmic reticulum membrane|plasma membrane|phosphatidic acid biosynthetic process|phospholipid biosynthetic process|membrane|integral component of membrane|CDP-diacylglycerol biosynthetic process	hsa00561,hsa00564,hsa04072	Glycerolipid metabolism|Glycerophospholipid metabolism|Phospholipase D signaling pathway
AGPAT4	1.51141	1.10146	1.35609	1.72048	0.466723	0.671521	-0.717321	0.0650446	GeneID:56895,Genbank:XM_017011059.1,HGNC:HGNC:20885,MIM:614795	1-acylglycerol-3-phosphate O-acyltransferase 4	GO:0003841,GO:0005789,GO:0006654,GO:0008654,GO:0016021,GO:0016024	1-acylglycerol-3-phosphate O-acyltransferase activity|endoplasmic reticulum membrane|phosphatidic acid biosynthetic process|phospholipid biosynthetic process|integral component of membrane|CDP-diacylglycerol biosynthetic process	hsa00561,hsa00564,hsa04072	Glycerolipid metabolism|Glycerophospholipid metabolism|Phospholipase D signaling pathway
AGPAT5	2.18355	2.87338	2.19924	2.56465	2.85877	2.68564	0.147508	0.609622	GeneID:55326,Genbank:NM_018361.3,HGNC:HGNC:20886,MIM:614796	1-acylglycerol-3-phosphate O-acyltransferase 5	GO:0002244,GO:0003841,GO:0005635,GO:0005739,GO:0005741,GO:0005789,GO:0006639,GO:0006654,GO:0008654,GO:0016021,GO:0016024	hematopoietic progenitor cell differentiation|1-acylglycerol-3-phosphate O-acyltransferase activity|nuclear envelope|mitochondrion|mitochondrial outer membrane|endoplasmic reticulum membrane|acylglycerol metabolic process|phosphatidic acid biosynthetic process|phospholipid biosynthetic process|integral component of membrane|CDP-diacylglycerol biosynthetic process	hsa00561,hsa00564,hsa04072	Glycerolipid metabolism|Glycerophospholipid metabolism|Phospholipase D signaling pathway
AGPS	5.81815	5.62612	5.51262	5.76482	5.5475	5.26746	-0.119852	0.635801	GeneID:8540,Genbank:NM_003659.3,HGNC:HGNC:327,MIM:603051	alkylglycerone phosphate synthase	GO:0005730,GO:0005739,GO:0005777,GO:0005778,GO:0005782,GO:0008609,GO:0008610,GO:0008611,GO:0016020,GO:0016614,GO:0071949	nucleolus|mitochondrion|peroxisome|peroxisomal membrane|peroxisomal matrix|alkylglycerone-phosphate synthase activity|lipid biosynthetic process|ether lipid biosynthetic process|membrane|oxidoreductase activity, acting on CH-OH group of donors|FAD binding	hsa00565,hsa04146	Ether lipid metabolism|Peroxisome
AGR2	18.6459	9.74204	8.07663	40.7068	16.3036	47.4495	1.45382	0.000191304	GeneID:10551,Genbank:XM_005249581.5,HGNC:HGNC:328,MIM:606358	anterior gradient 2, protein disulphide isomerase family member	GO:0002162,GO:0005154,GO:0005615,GO:0005739,GO:0005783,GO:0010628,GO:0010811,GO:0030154,GO:0042803,GO:0045742,GO:0048546,GO:0048639,GO:0060480,GO:0060548,GO:0070254,GO:1903078,GO:1903896,GO:1903899	dystroglycan binding|epidermal growth factor receptor binding|extracellular space|mitochondrion|endoplasmic reticulum|positive regulation of gene expression|positive regulation of cell-substrate adhesion|cell differentiation|protein homodimerization activity|positive regulation of epidermal growth factor receptor signaling pathway|digestive tract morphogenesis|positive regulation of developmental…
AGR3	33.0315	10.0142	12.3438	31.5915	39.2312	9.07263	0.290996	0.525851	GeneID:155465,Genbank:XM_011515152.2,HGNC:HGNC:24167,MIM:609482	anterior gradient 3, protein disulphide isomerase family member	GO:0002162,GO:0005783,GO:0030154,GO:0043231,GO:0060548	dystroglycan binding|endoplasmic reticulum|cell differentiation|intracellular membrane-bounded organelle|negative regulation of cell death
AGRN	30.4339	30.3068	26.0739	21.7861	50.7157	38.8657	0.376115	0.219189	GeneID:375790,Genbank:XM_005244749.3,HGNC:HGNC:329,MIM:103320	agrin			hsa04512	ECM-receptor interaction
AGRP	1.16621	1.36515	0.626008	1.59873	0.398887	0.763489	-0.434865	0.568295	GeneID:181,Genbank:NM_001138.1,HGNC:HGNC:330,MIM:602311	agouti related neuropeptide			hsa04920	Adipocytokine signaling pathway
AGTPBP1	3.7481	3.19813	2.88658	2.96149	1.44189	1.91319	-0.764661	0.00791025	GeneID:23287,Genbank:NM_001286717.1,HGNC:HGNC:17258,MIM:606830	ATP/GTP binding protein 1	GO:0001754,GO:0004181,GO:0005634,GO:0005730,GO:0005737,GO:0005739,GO:0005829,GO:0007005,GO:0008270,GO:0015631,GO:0021702,GO:0021772,GO:0035609,GO:0035610,GO:0043231,GO:0050905	eye photoreceptor cell differentiation|metallocarboxypeptidase activity|nucleus|nucleolus|cytoplasm|mitochondrion|cytosol|mitochondrion organization|zinc ion binding|tubulin binding|cerebellar Purkinje cell differentiation|olfactory bulb development|C-terminal protein deglutamylation|protein side chain deglutamylation|intracellular membrane-bounded organelle|neuromuscular process
AGTR1	3.48175	1.91346	2.43611	3.74464	0.573327	0.446246	-1.45826	0.00606223	GeneID:185,Genbank:NM_031850.3,HGNC:HGNC:336,MIM:106165	angiotensin II receptor type 1			hsa04020,hsa04022,hsa04072,hsa04080,hsa04261,hsa04270,hsa04371,hsa04614,hsa04924,hsa04925,hsa04927,hsa04933,hsa04934,hsa05200	Calcium signaling pathway|cGMP-PKG signaling pathway|Phospholipase D signaling pathway|Neuroactive ligand-receptor interaction|Adrenergic signaling in cardiomyocytes|Vascular smooth muscle contraction|Apelin signaling pathway|Renin-angiotensin system|Renin secretion|Aldosterone synthesis and secretion|Cortisol synthesis and secretion|AGE-RAGE signaling pathway in diabetic complications|Cushing sy…
AGTR2	0.526919	6.92135	1.84912	0.261221	0	0.0512156	-5.34118	0.0133526	GeneID:186,Genbank:NM_000686.4,HGNC:HGNC:338,MIM:300034	angiotensin II receptor type 2	GO:0001974,GO:0001991,GO:0002018,GO:0002033,GO:0002035,GO:0004945,GO:0005576,GO:0005886,GO:0005887,GO:0006883,GO:0006954,GO:0007166,GO:0007186,GO:0007199,GO:0007263,GO:0007420,GO:0008134,GO:0008217,GO:0008284,GO:0010459,GO:0010700,GO:0017046,GO:0021695,GO:0030308,GO:0032304,GO:0032516,GO:0035556,GO:0035566,GO:0035640,GO:0035815,GO:0035932,GO:0042306,GO:0042311,GO:0042416,GO:0043537,GO:0045429,GO:…	blood vessel remodeling|regulation of systemic arterial blood pressure by circulatory renin-angiotensin|renin-angiotensin regulation of aldosterone production|angiotensin-mediated vasodilation involved in regulation of systemic arterial blood pressure|brain renin-angiotensin system|angiotensin type II receptor activity|extracellular region|plasma membrane|integral component of plasma membrane|cel…	hsa04080,hsa04261,hsa04614	Neuroactive ligand-receptor interaction|Adrenergic signaling in cardiomyocytes|Renin-angiotensin system
AGTRAP	12.6121	11.2576	8.9996	12.2006	18.1274	16.4266	0.525194	0.0750868	GeneID:57085,Genbank:NM_001040197.1,HGNC:HGNC:13539,MIM:608729	angiotensin II receptor associated protein
AHCTF1	4.38625	5.48892	4.31937	4.19353	6.9397	10.3303	0.469908	0.168476	GeneID:25909,Genbank:NM_001323343.1,HGNC:HGNC:24618,MIM:610853	AT-hook containing transcription factor 1	GO:0000777,GO:0000910,GO:0003677,GO:0003700,GO:0005634,GO:0005643,GO:0005654,GO:0005829,GO:0007062,GO:0015031,GO:0016363,GO:0031965,GO:0034399,GO:0051028,GO:0051292,GO:0070062	condensed chromosome kinetochore|cytokinesis|DNA binding|DNA binding transcription factor activity|nucleus|nuclear pore|nucleoplasm|cytosol|sister chromatid cohesion|protein transport|nuclear matrix|nuclear membrane|nuclear periphery|mRNA transport|nuclear pore complex assembly|extracellular exosome
AHCY	4.52963	4.72406	4.02928	4.91933	7.90322	8.7657	0.720159	0.0192904	GeneID:191,Genbank:XM_011528657.2,HGNC:HGNC:343,MIM:180960	adenosylhomocysteinase	GO:0000096,GO:0001666,GO:0002439,GO:0004013,GO:0005634,GO:0005829,GO:0006730,GO:0007584,GO:0019510,GO:0030554,GO:0032259,GO:0033353,GO:0042470,GO:0042745,GO:0042802,GO:0043005,GO:0051287,GO:0070062,GO:0071268	sulfur amino acid metabolic process|response to hypoxia|chronic inflammatory response to antigenic stimulus|adenosylhomocysteinase activity|nucleus|cytosol|one-carbon metabolic process|response to nutrient|S-adenosylhomocysteine catabolic process|adenyl nucleotide binding|methylation|S-adenosylmethionine cycle|melanosome|circadian sleep/wake cycle|identical protein binding|neuron projection|NAD b…	hsa00270	Cysteine and methionine metabolism
AHCYL1	15.996	12.3022	12.95	16.6778	21.2554	21.4575	0.517108	0.0736269	GeneID:10768,Genbank:NM_001242673.1,HGNC:HGNC:344,MIM:607826	adenosylhomocysteinase like 1	GO:0003723,GO:0005737,GO:0005783,GO:0005829,GO:0006378,GO:0006611,GO:0006730,GO:0010765,GO:0016324,GO:0031440,GO:0032412,GO:0033353,GO:0038166,GO:0042045,GO:0042802,GO:0043231,GO:0044070,GO:0051592	RNA binding|cytoplasm|endoplasmic reticulum|cytosol|mRNA polyadenylation|protein export from nucleus|one-carbon metabolic process|positive regulation of sodium ion transport|apical plasma membrane|regulation of mRNA 3'-end processing|regulation of ion transmembrane transporter activity|S-adenosylmethionine cycle|angiotensin-activated signaling pathway|epithelial fluid transport|identical protein …	hsa00270	Cysteine and methionine metabolism
AHCYL2	14.563	13.3349	12.497	14.3404	23.8198	46.2091	0.888454	0.0209306	GeneID:23382,Genbank:NM_015328.3,HGNC:HGNC:22204,MIM:616520	adenosylhomocysteinase like 2	GO:0005783,GO:0005829,GO:0006730,GO:0016787,GO:0033353,GO:0043005	endoplasmic reticulum|cytosol|one-carbon metabolic process|hydrolase activity|S-adenosylmethionine cycle|neuron projection	hsa00270	Cysteine and methionine metabolism
AHDC1	4.56901	4.06576	3.56754	3.96057	8.42556	3.94199	0.419016	0.220594	GeneID:27245,Genbank:NM_001029882.3,HGNC:HGNC:25230,MIM:615790	AT-hook DNA binding motif containing 1	GO:0003677	DNA binding
AHI1	2.24606	1.89148	1.94916	2.02679	3.02807	1.45203	-0.0294191	0.934267	GeneID:54806,Genbank:NM_001134830.1,HGNC:HGNC:21575,MIM:608894	Abelson helper integration site 1	GO:0001738,GO:0001947,GO:0002092,GO:0005813,GO:0005814,GO:0005829,GO:0005911,GO:0005912,GO:0005929,GO:0007169,GO:0007417,GO:0010842,GO:0016192,GO:0030862,GO:0030902,GO:0034613,GO:0035844,GO:0035845,GO:0036038,GO:0036064,GO:0039008,GO:0039023,GO:0042802,GO:0043066,GO:0045944,GO:0050795,GO:0060271,GO:0065001,GO:0070121,GO:0070986,GO:0071599,GO:0097711,GO:0097730	morphogenesis of a polarized epithelium|heart looping|positive regulation of receptor internalization|centrosome|centriole|cytosol|cell-cell junction|adherens junction|cilium|transmembrane receptor protein tyrosine kinase signaling pathway|central nervous system development|retina layer formation|vesicle-mediated transport|positive regulation of polarized epithelial cell differentiation|hindbrain…
AHNAK	120.48	109.194	100.102	88.6185	44.6077	32.0223	-1.14271	0.000635595	GeneID:79026,Genbank:NM_024060.3,HGNC:HGNC:347,MIM:103390	AHNAK nucleoprotein	GO:0003723,GO:0005634,GO:0005737,GO:0005765,GO:0005829,GO:0005886,GO:0005925,GO:0015629,GO:0016020,GO:0030315,GO:0031982,GO:0042383,GO:0043034,GO:0043484,GO:0044291,GO:0044548,GO:0045296,GO:0051259,GO:0070062,GO:0097493,GO:1901385	RNA binding|nucleus|cytoplasm|lysosomal membrane|cytosol|plasma membrane|focal adhesion|actin cytoskeleton|membrane|T-tubule|vesicle|sarcolemma|costamere|regulation of RNA splicing|cell-cell contact zone|S100 protein binding|cadherin binding|protein oligomerization|extracellular exosome|structural molecule activity conferring elasticity|regulation of voltage-gated calcium channel activity
AHNAK2	1.64729	0.990054	1.50568	1.52004	0.431958	2.2499	-0.180211	0.631771	GeneID:113146,Genbank:NM_138420.3,HGNC:HGNC:20125,MIM:608570	AHNAK nucleoprotein 2	GO:0005634,GO:0005737,GO:0005829,GO:0005886,GO:0030018,GO:0030315,GO:0030659,GO:0042383,GO:0043034	nucleus|cytoplasm|cytosol|plasma membrane|Z disc|T-tubule|cytoplasmic vesicle membrane|sarcolemma|costamere
AHR	46.3634	38.8876	34.5216	33.4824	50.3456	45.2653	0.0769317	0.800695	GeneID:196,Genbank:NM_001621.4,HGNC:HGNC:348,MIM:600253	aryl hydrocarbon receptor	GO:0001094,GO:0001223,GO:0001568,GO:0003677,GO:0003700,GO:0004874,GO:0004879,GO:0005634,GO:0005654,GO:0005667,GO:0005737,GO:0005829,GO:0006355,GO:0006357,GO:0006366,GO:0006805,GO:0006915,GO:0007049,GO:0008134,GO:0009410,GO:0009636,GO:0010468,GO:0017025,GO:0030888,GO:0032922,GO:0034752,GO:0034753,GO:0035326,GO:0043234,GO:0044212,GO:0045892,GO:0045893,GO:0045944,GO:0046982,GO:0046983,GO:0051879,GO:…	TFIID-class transcription factor binding|transcription coactivator binding|blood vessel development|DNA binding|DNA binding transcription factor activity|aryl hydrocarbon receptor activity|nuclear receptor activity|nucleus|nucleoplasm|transcription factor complex|cytoplasm|cytosol|regulation of transcription, DNA-templated|regulation of transcription from RNA polymerase II promoter|transcription …	hsa04659,hsa04934	Th17 cell differentiation|Cushing syndrome
AHSA1	12.3653	9.40431	7.69077	12.3084	14.9077	9.44962	0.316037	0.283895	GeneID:10598,Genbank:NM_001321441.1,HGNC:HGNC:1189,MIM:608466	activator of HSP90 ATPase activity 1	GO:0001671,GO:0005783,GO:0005829,GO:0006950,GO:0045296,GO:0051087,GO:0070062	ATPase activator activity|endoplasmic reticulum|cytosol|response to stress|cadherin binding|chaperone binding|extracellular exosome
AIDA	8.571	8.81581	6.88038	8.38449	11.9182	16.1527	0.503157	0.144827	GeneID:64853,Genbank:NM_022831.2,HGNC:HGNC:25761,MIM:612375	axin interactor, dorsalization associated	GO:0005737,GO:0009953,GO:0016020,GO:0019904,GO:0035091,GO:0043496,GO:0043508,GO:0046329,GO:0048264	cytoplasm|dorsal/ventral pattern formation|membrane|protein domain specific binding|phosphatidylinositol binding|regulation of protein homodimerization activity|negative regulation of JUN kinase activity|negative regulation of JNK cascade|determination of ventral identity
AIF1	6.61011	6.17989	5.66932	8.29075	3.01697	5.83699	-0.192393	0.603119	GeneID:199,Genbank:NM_001623.4,HGNC:HGNC:352,MIM:601833	allograft inflammatory factor 1	GO:0001774,GO:0001891,GO:0001934,GO:0005509,GO:0005634,GO:0005737,GO:0005829,GO:0005884,GO:0006911,GO:0006954,GO:0010629,GO:0014739,GO:0016601,GO:0030027,GO:0030041,GO:0031668,GO:0032587,GO:0032870,GO:0042102,GO:0043066,GO:0043204,GO:0045429,GO:0048471,GO:0048661,GO:0048662,GO:0048678,GO:0051015,GO:0051017,GO:0051384,GO:0051602,GO:0071315,GO:0071346,GO:0071447,GO:0071672,GO:0071673,GO:0090026,GO:…	microglial cell activation|phagocytic cup|positive regulation of protein phosphorylation|calcium ion binding|nucleus|cytoplasm|cytosol|actin filament|phagocytosis, engulfment|inflammatory response|negative regulation of gene expression|positive regulation of muscle hyperplasia|Rac protein signal transduction|lamellipodium|actin filament polymerization|cellular response to extracellular stimulus|r…
AIF1L	6.86568	4.99367	5.39948	5.83008	5.48511	11.0266	0.353359	0.286382	GeneID:83543,Genbank:NM_001185095.1,HGNC:HGNC:28904	allograft inflammatory factor 1 like	GO:0005509,GO:0005737,GO:0005925,GO:0015629,GO:0032587,GO:0043234,GO:0051015,GO:0070062	calcium ion binding|cytoplasm|focal adhesion|actin cytoskeleton|ruffle membrane|protein complex|actin filament binding|extracellular exosome
AIFM1	2.44701	2.26699	2.20371	2.5693	5.05687	3.38449	0.605439	0.0780707	GeneID:9131,Genbank:NM_145812.2,HGNC:HGNC:8768,MIM:310490	apoptosis inducing factor mitochondria associated 1			hsa04210,hsa04217	Apoptosis|Necroptosis
AIFM2	2.54613	1.98419	2.04432	2.28107	1.52178	2.83689	-0.0102199	0.975602	GeneID:84883,Genbank:NM_032797.5,HGNC:HGNC:21411,MIM:605159	apoptosis inducing factor, mitochondria associated 2			hsa04115	p53 signaling pathway
AIG1	1.31464	1.43983	1.43901	1.3467	2.34649	1.04845	0.113385	0.745368	GeneID:51390,Genbank:NM_001286587.1,HGNC:HGNC:21607,MIM:608514	androgen induced 1	GO:0012505,GO:0016020,GO:0016021,GO:0016787,GO:0042758	endomembrane system|membrane|integral component of membrane|hydrolase activity|long-chain fatty acid catabolic process
AIMP1	4.21162	3.6761	3.46128	3.57432	3.62336	3.86616	-0.0627176	0.81693	GeneID:9255,Genbank:NM_001142415.1,HGNC:HGNC:10648,MIM:603605	aminoacyl tRNA synthetase complex interacting multifunctional protein 1	GO:0000049,GO:0001525,GO:0001937,GO:0005125,GO:0005615,GO:0005634,GO:0005783,GO:0005794,GO:0005829,GO:0006006,GO:0006418,GO:0006915,GO:0006935,GO:0006954,GO:0007155,GO:0007165,GO:0007267,GO:0009611,GO:0009986,GO:0016020,GO:0017101,GO:0017102,GO:0030133,GO:0042803,GO:0050900,GO:0051020,GO:0051607	tRNA binding|angiogenesis|negative regulation of endothelial cell proliferation|cytokine activity|extracellular space|nucleus|endoplasmic reticulum|Golgi apparatus|cytosol|glucose metabolic process|tRNA aminoacylation for protein translation|apoptotic process|chemotaxis|inflammatory response|cell adhesion|signal transduction|cell-cell signaling|response to wounding|cell surface|membrane|aminoacyl…
AIMP2	1.96244	1.69551	1.78053	1.76246	2.97214	4.09804	0.701282	0.0681983	GeneID:7965,Genbank:NM_001326609.1,HGNC:HGNC:20609,MIM:600859	aminoacyl tRNA synthetase complex interacting multifunctional protein 2	GO:0005634,GO:0005829,GO:0006418,GO:0006461,GO:0006915,GO:0008285,GO:0016020,GO:0017101,GO:0031398,GO:0032947,GO:0060510,GO:1901216,GO:1903632	nucleus|cytosol|tRNA aminoacylation for protein translation|protein complex assembly|apoptotic process|negative regulation of cell proliferation|membrane|aminoacyl-tRNA synthetase multienzyme complex|positive regulation of protein ubiquitination|protein complex scaffold activity|Type II pneumocyte differentiation|positive regulation of neuron death|positive regulation of aminoacyl-tRNA ligase act…
AIP	10.292	10.0503	9.28643	11.6597	6.9358	10.3379	-0.0457617	0.883091	GeneID:9049,Genbank:XM_024448761.1,HGNC:HGNC:358,MIM:605555	aryl hydrocarbon receptor interacting protein			hsa04934	Cushing syndrome
AJUBA	6.70972	5.29671	5.37002	3.99825	3.24466	6.62977	-0.396612	0.216498	GeneID:84962,Genbank:NM_032876.5,HGNC:HGNC:20250,MIM:609066	ajuba LIM protein	GO:0000086,GO:0000122,GO:0000932,GO:0001666,GO:0003682,GO:0003714,GO:0005634,GO:0005667,GO:0005794,GO:0005815,GO:0005829,GO:0005886,GO:0005911,GO:0005912,GO:0005925,GO:0006351,GO:0006355,GO:0007010,GO:0016339,GO:0030027,GO:0030032,GO:0030334,GO:0031328,GO:0031334,GO:0033673,GO:0034613,GO:0035195,GO:0035313,GO:0035331,GO:0043087,GO:0043123,GO:0043406,GO:0045294,GO:0046474,GO:0046872,GO:0048041,GO:…	G2/M transition of mitotic cell cycle|negative regulation of transcription from RNA polymerase II promoter|P-body|response to hypoxia|chromatin binding|transcription corepressor activity|nucleus|transcription factor complex|Golgi apparatus|microtubule organizing center|cytosol|plasma membrane|cell-cell junction|adherens junction|focal adhesion|transcription, DNA-templated|regulation of transcript…	hsa04390,hsa04392	Hippo signaling pathway|Hippo signaling pathway - multiple species
AK1	12.0817	10.1503	9.03202	9.52591	8.74542	20.5207	0.302608	0.381848	GeneID:203,Genbank:NM_001318121.1,HGNC:HGNC:361,MIM:103000	adenylate kinase 1			hsa00230,hsa00730	Purine metabolism|Thiamine metabolism
AK2	7.21594	7.30001	7.19513	7.9556	16.8997	9.8618	0.636618	0.0510986	GeneID:204,Genbank:NM_001319142.1,HGNC:HGNC:362,MIM:103020	adenylate kinase 2	GO:0004017,GO:0005524,GO:0005743,GO:0005758,GO:0006172,GO:0015949,GO:0070062,GO:0097226	adenylate kinase activity|ATP binding|mitochondrial inner membrane|mitochondrial intermembrane space|ADP biosynthetic process|nucleobase-containing small molecule interconversion|extracellular exosome|sperm mitochondrial sheath	hsa00230,hsa00730	Purine metabolism|Thiamine metabolism
AK3	8.71934	6.75702	7.59322	8.33081	6.37634	6.22711	-0.15373	0.558282	GeneID:50808,Genbank:NM_001199853.1,HGNC:HGNC:17376,MIM:609290	adenylate kinase 3	GO:0005524,GO:0005525,GO:0005739,GO:0005759,GO:0007596,GO:0046033,GO:0046039,GO:0046041,GO:0046051,GO:0046899	ATP binding|GTP binding|mitochondrion|mitochondrial matrix|blood coagulation|AMP metabolic process|GTP metabolic process|ITP metabolic process|UTP metabolic process|nucleoside triphosphate adenylate kinase activity	hsa00230	Purine metabolism
AK6	5.04719	3.41398	2.97678	3.78811	4.81646	3.6659	0.0950241	0.801136	GeneID:102157402,Genbank:NM_001015891.1,HGNC:HGNC:49151	adenylate kinase 6	GO:0004017,GO:0005524,GO:0005654,GO:0005737,GO:0005829,GO:0015030,GO:0015949,GO:0016020,GO:0050145	adenylate kinase activity|ATP binding|nucleoplasm|cytoplasm|cytosol|Cajal body|nucleobase-containing small molecule interconversion|membrane|nucleoside phosphate kinase activity	hsa00230,hsa03008	Purine metabolism|Ribosome biogenesis in eukaryotes
AK7	2.25223	0.264458	0.573102	0.693233	1.15774	0.538423	0.0374024	0.954808	GeneID:122481,Genbank:NM_152327.4,HGNC:HGNC:20091,MIM:615364	adenylate kinase 7	GO:0004017,GO:0004127,GO:0004550,GO:0005524,GO:0005829,GO:0006165,GO:0009142,GO:0015949,GO:0019206,GO:0030030	adenylate kinase activity|cytidylate kinase activity|nucleoside diphosphate kinase activity|ATP binding|cytosol|nucleoside diphosphate phosphorylation|nucleoside triphosphate biosynthetic process|nucleobase-containing small molecule interconversion|nucleoside kinase activity|cell projection organization	hsa00230,hsa00730	Purine metabolism|Thiamine metabolism
AKAP1	7.13438	6.66856	6.9288	9.76402	12.2906	13.133	0.792036	0.00262249	GeneID:8165,Genbank:NM_003488.3,HGNC:HGNC:367,MIM:602449	A-kinase anchoring protein 1	GO:0003723,GO:0005739,GO:0005741,GO:0005829,GO:0007596,GO:0010738,GO:0016020,GO:0016021,GO:0034237	RNA binding|mitochondrion|mitochondrial outer membrane|cytosol|blood coagulation|regulation of protein kinase A signaling|membrane|integral component of membrane|protein kinase A regulatory subunit binding
AKAP10	4.83322	5.95939	4.92602	4.83692	2.71107	4.08143	-0.429767	0.196325	GeneID:11216,Genbank:NM_001330152.1,HGNC:HGNC:368,MIM:604694	A-kinase anchoring protein 10	GO:0005739,GO:0005829,GO:0005886,GO:0007165,GO:0007596,GO:0008104,GO:0043234,GO:0051018	mitochondrion|cytosol|plasma membrane|signal transduction|blood coagulation|protein localization|protein complex|protein kinase A binding
AKAP11	10.7362	12.5043	11.6902	9.39097	6.92797	5.96498	-0.742403	0.0084889	GeneID:11215,Genbank:XM_011534906.2,HGNC:HGNC:369,MIM:604696	A-kinase anchoring protein 11	GO:0005730,GO:0005777,GO:0005815,GO:0005829,GO:0005886,GO:0008157,GO:0010738,GO:0035556,GO:0051018	nucleolus|peroxisome|microtubule organizing center|cytosol|plasma membrane|protein phosphatase 1 binding|regulation of protein kinase A signaling|intracellular signal transduction|protein kinase A binding
AKAP12	6.17503	4.89589	4.75319	3.50806	0.84232	0.891858	-1.98757	1.03937e-06	GeneID:9590,Genbank:XM_017011517.2,HGNC:HGNC:370,MIM:604698	A-kinase anchoring protein 12
AKAP13	29.8019	29.0184	24.596	27.4605	40.5917	44.2387	0.417933	0.149671	GeneID:11214,Genbank:NM_007200.4,HGNC:HGNC:371,MIM:604686	A-kinase anchoring protein 13	GO:0004691,GO:0004871,GO:0005078,GO:0005085,GO:0005089,GO:0005634,GO:0005829,GO:0005884,GO:0005938,GO:0007186,GO:0007507,GO:0010611,GO:0016020,GO:0017048,GO:0032947,GO:0035025,GO:0035556,GO:0043065,GO:0043123,GO:0043406,GO:0046872,GO:0048471,GO:0051018,GO:0051056,GO:0051168,GO:0055007,GO:0060297,GO:0060348,GO:0071875,GO:0086023,GO:1900169	cAMP-dependent protein kinase activity|signal transducer activity|MAP-kinase scaffold activity|guanyl-nucleotide exchange factor activity|Rho guanyl-nucleotide exchange factor activity|nucleus|cytosol|actin filament|cell cortex|G-protein coupled receptor signaling pathway|heart development|regulation of cardiac muscle hypertrophy|membrane|Rho GTPase binding|protein complex scaffold activity|posit…	hsa04928,hsa05163	Parathyroid hormone synthesis, secretion and action|Human cytomegalovirus infection
AKAP14	1.25186	0	0.112929	0.472162	0.0400247	0.305229	0.953704	0.406941	GeneID:158798,Genbank:NM_178813.5,HGNC:HGNC:24061,MIM:300462	A-kinase anchoring protein 14	GO:0005930,GO:0005952,GO:0034237	axoneme|cAMP-dependent protein kinase complex|protein kinase A regulatory subunit binding
AKAP2	43.5059	42.5766	28.4186	26.405	4.9747	4.79752	-1.58287	0.0924173	GeneID:11217,Genbank:NM_001198656.1,HGNC:HGNC:372,MIM:604582	A-kinase anchoring protein 2
AKAP5	1.40401	1.31221	1.00063	1.16589	0.739321	2.3853	-0.0312355	0.945716	GeneID:9495,Genbank:NM_004857.3,HGNC:HGNC:375,MIM:604688	A-kinase anchoring protein 5	GO:0005516,GO:0005829,GO:0005886,GO:0006605,GO:0007165,GO:0007193,GO:0007268,GO:0008179,GO:0010738,GO:0017124,GO:0030346,GO:0034237,GO:0035254,GO:0051018,GO:0097110	calmodulin binding|cytosol|plasma membrane|protein targeting|signal transduction|adenylate cyclase-inhibiting G-protein coupled receptor signaling pathway|chemical synaptic transmission|adenylate cyclase binding|regulation of protein kinase A signaling|SH3 domain binding|protein phosphatase 2B binding|protein kinase A regulatory subunit binding|glutamate receptor binding|protein kinase A binding|…
AKAP6	1.06363	0.465474	0.71977	0.671644	0.917953	0.457189	-0.155729	0.716953	GeneID:9472,Genbank:XM_024449755.1,HGNC:HGNC:376,MIM:604691	A-kinase anchoring protein 6	GO:0001508,GO:0005635,GO:0005737,GO:0005901,GO:0006605,GO:0008179,GO:0010738,GO:0010880,GO:0014701,GO:0014704,GO:0016529,GO:0019933,GO:0030307,GO:0030315,GO:0031965,GO:0032516,GO:0032947,GO:0034237,GO:0034704,GO:0035556,GO:0043495,GO:0044325,GO:0048471,GO:0051018,GO:0051281,GO:0060306,GO:0060316,GO:0061051,GO:0070886,GO:0071320,GO:0071345,GO:1901381,GO:1902261	action potential|nuclear envelope|cytoplasm|caveola|protein targeting|adenylate cyclase binding|regulation of protein kinase A signaling|regulation of release of sequestered calcium ion into cytosol by sarcoplasmic reticulum|junctional sarcoplasmic reticulum membrane|intercalated disc|sarcoplasmic reticulum|cAMP-mediated signaling|positive regulation of cell growth|T-tubule|nuclear membrane|posit…
AKAP7	0.786875	0.75362	0.533257	0.674798	0.510647	1.26614	0.121722	0.767086	GeneID:9465,Genbank:XM_017011509.1,HGNC:HGNC:377,MIM:604693	A-kinase anchoring protein 7	GO:0001508,GO:0005622,GO:0005886,GO:0006811,GO:0008104,GO:0016324,GO:0016328,GO:0035556,GO:0051018,GO:0060306,GO:0071320,GO:1901381,GO:1902261	action potential|intracellular|plasma membrane|ion transport|protein localization|apical plasma membrane|lateral plasma membrane|intracellular signal transduction|protein kinase A binding|regulation of membrane repolarization|cellular response to cAMP|positive regulation of potassium ion transmembrane transport|positive regulation of delayed rectifier potassium channel activity
AKAP8	4.46279	3.41385	3.39194	3.81496	3.17239	3.53282	-0.053447	0.83859	GeneID:10270,Genbank:NM_005858.3,HGNC:HGNC:378,MIM:604692	A-kinase anchoring protein 8	GO:0000278,GO:0000793,GO:0001939,GO:0003690,GO:0003723,GO:0005634,GO:0005654,GO:0005730,GO:0005739,GO:0005794,GO:0006351,GO:0006355,GO:0007076,GO:0007165,GO:0008270,GO:0015031,GO:0016020,GO:0016363,GO:0031065,GO:0032720,GO:0033127,GO:0034237,GO:0042826,GO:0044839,GO:0045087,GO:0051059,GO:0071222,GO:0071380	mitotic cell cycle|condensed chromosome|female pronucleus|double-stranded DNA binding|RNA binding|nucleus|nucleoplasm|nucleolus|mitochondrion|Golgi apparatus|transcription, DNA-templated|regulation of transcription, DNA-templated|mitotic chromosome condensation|signal transduction|zinc ion binding|protein transport|membrane|nuclear matrix|positive regulation of histone deacetylation|negative regu…
AKAP8L	3.66931	3.67707	3.91966	4.92624	3.09298	3.84711	0.0412152	0.89261	GeneID:26993,Genbank:NM_001291478.1,HGNC:HGNC:29857,MIM:609475	A-kinase anchoring protein 8 like	GO:0000785,GO:0003677,GO:0003723,GO:0005521,GO:0005634,GO:0005737,GO:0006351,GO:0006397,GO:0007076,GO:0008380,GO:0010793,GO:0016363,GO:0016605,GO:0016607,GO:0017151,GO:0030529,GO:0031065,GO:0033127,GO:0034237,GO:0042826,GO:0044839,GO:0045944,GO:0046872,GO:0051081	chromatin|DNA binding|RNA binding|lamin binding|nucleus|cytoplasm|transcription, DNA-templated|mRNA processing|mitotic chromosome condensation|RNA splicing|regulation of mRNA export from nucleus|nuclear matrix|PML body|nuclear speck|DEAD/H-box RNA helicase binding|intracellular ribonucleoprotein complex|positive regulation of histone deacetylation|regulation of histone phosphorylation|protein kin…
AKAP9	5.68491	5.66333	5.86596	5.35956	7.13924	11.5739	0.375274	0.245137	GeneID:10142,Genbank:XM_017011642.2,HGNC:HGNC:379,MIM:604001	A-kinase anchoring protein 9
AKIP1	1.35115	1.47514	1.05876	1.48532	1.44151	1.73756	0.274644	0.403741	GeneID:56672,Genbank:XM_017018012.2,HGNC:HGNC:1170,MIM:609191	A-kinase interacting protein 1	GO:0005654,GO:0034446,GO:1901222	nucleoplasm|substrate adhesion-dependent cell spreading|regulation of NIK/NF-kappaB signaling
AKIRIN1	15.9618	15.8096	12.8413	13.14	20.5219	14.3456	0.0543854	0.85066	GeneID:79647,Genbank:NM_024595.2,HGNC:HGNC:25744,MIM:615164	akirin 1	GO:0005634,GO:0005654,GO:0031965	nucleus|nucleoplasm|nuclear membrane
AKIRIN2	20.7386	18.7841	14.8891	19.3724	9.02878	11.6047	-0.515546	0.106607	GeneID:55122,Genbank:NM_018064.3,HGNC:HGNC:21407,MIM:615165	akirin 2	GO:0000122,GO:0005634,GO:0005654,GO:0006351,GO:0008284,GO:0009790,GO:0010950,GO:0017053,GO:0019899,GO:0032496,GO:0032755,GO:0045087,GO:0045944	negative regulation of transcription from RNA polymerase II promoter|nucleus|nucleoplasm|transcription, DNA-templated|positive regulation of cell proliferation|embryo development|positive regulation of endopeptidase activity|transcriptional repressor complex|enzyme binding|response to lipopolysaccharide|positive regulation of interleukin-6 production|innate immune response|positive regulation of …
AKNA	7.83393	7.41082	6.4355	7.22574	3.99365	3.91049	-0.548533	0.0907242	GeneID:80709,Genbank:XM_005252244.2,HGNC:HGNC:24108,MIM:605729	AT-hook transcription factor	GO:0000978,GO:0001077,GO:0001650,GO:0005654,GO:0005813,GO:0005829,GO:0016020,GO:0043231,GO:0045944	RNA polymerase II proximal promoter sequence-specific DNA binding|transcriptional activator activity, RNA polymerase II proximal promoter sequence-specific DNA binding|fibrillar center|nucleoplasm|centrosome|cytosol|membrane|intracellular membrane-bounded organelle|positive regulation of transcription from RNA polymerase II promoter
AKR1A1	15.3692	15.2866	14.3455	16.3685	32.9022	20.914	0.645912	0.0375504	GeneID:10327,Genbank:XM_011540492.2,HGNC:HGNC:380,MIM:103830	aldo-keto reductase family 1 member A1	GO:0004032,GO:0004033,GO:0005615,GO:0005829,GO:0006006,GO:0006081,GO:0009055,GO:0016324,GO:0019640,GO:0019853,GO:0042840,GO:0046185,GO:0047939,GO:0070062,GO:1901687	alditol:NADP+ 1-oxidoreductase activity|aldo-keto reductase (NADP) activity|extracellular space|cytosol|glucose metabolic process|cellular aldehyde metabolic process|electron transfer activity|apical plasma membrane|glucuronate catabolic process to xylulose 5-phosphate|L-ascorbic acid biosynthetic process|D-glucuronate catabolic process|aldehyde catabolic process|L-glucuronate reductase activity|…	hsa00010,hsa00040,hsa00561	Glycolysis / Gluconeogenesis|Pentose and glucuronate interconversions|Glycerolipid metabolism
AKR1B1	6.4802	10.9768	9.53042	8.05981	6.60535	7.34559	-0.217994	0.505261	GeneID:231,Genbank:NM_001346142.1,HGNC:HGNC:381,MIM:103880	aldo-keto reductase family 1 member B	GO:0001894,GO:0003091,GO:0004032,GO:0004033,GO:0005615,GO:0005654,GO:0005829,GO:0005975,GO:0006061,GO:0006700,GO:0006950,GO:0009055,GO:0009414,GO:0018931,GO:0031098,GO:0032838,GO:0033010,GO:0035809,GO:0042415,GO:0042629,GO:0043066,GO:0043220,GO:0043795,GO:0044597,GO:0044598,GO:0046370,GO:0046427,GO:0048471,GO:0048661,GO:0060135,GO:0070062,GO:0072061,GO:0097066,GO:0097238,GO:0097454,GO:1901653	tissue homeostasis|renal water homeostasis|alditol:NADP+ 1-oxidoreductase activity|aldo-keto reductase (NADP) activity|extracellular space|nucleoplasm|cytosol|carbohydrate metabolic process|sorbitol biosynthetic process|C21-steroid hormone biosynthetic process|response to stress|electron transfer activity|response to water deprivation|naphthalene metabolic process|stress-activated protein kinase …	hsa00040,hsa00051,hsa00052,hsa00561,hsa00790	Pentose and glucuronate interconversions|Fructose and mannose metabolism|Galactose metabolism|Glycerolipid metabolism|Folate biosynthesis
AKR1C1	5.48656	2.74038	4.26138	6.95847	5.26369	0.825445	-0.334048	0.567687	GeneID:1645,Genbank:NM_001353.5,HGNC:HGNC:384,MIM:600449	aldo-keto reductase family 1 member C1	GO:0001523,GO:0004032,GO:0004033,GO:0005829,GO:0006805,GO:0007586,GO:0008206,GO:0015721,GO:0016655,GO:0018636,GO:0030299,GO:0030855,GO:0031406,GO:0032052,GO:0042448,GO:0042574,GO:0042632,GO:0044597,GO:0044598,GO:0046683,GO:0047006,GO:0047042,GO:0047086,GO:0047115,GO:0047718,GO:0051260,GO:0055114,GO:0070062,GO:0071395	retinoid metabolic process|alditol:NADP+ 1-oxidoreductase activity|aldo-keto reductase (NADP) activity|cytosol|xenobiotic metabolic process|digestion|bile acid metabolic process|bile acid and bile salt transport|oxidoreductase activity, acting on NAD(P)H, quinone or similar compound as acceptor|phenanthrene 9,10-monooxygenase activity|intestinal cholesterol absorption|epithelial cell differentiat…	hsa00140,hsa00980	Steroid hormone biosynthesis|Metabolism of xenobiotics by cytochrome P450
AKR1C2	1.32982	0.720091	1.00395	0.933991	0.706704	0.231316	-0.785352	0.097624	GeneID:1646,Genbank:NM_205845.2,HGNC:HGNC:385,MIM:600450	aldo-keto reductase family 1 member C2	GO:0004032,GO:0005737,GO:0006693,GO:0007186,GO:0007586,GO:0008202,GO:0008284,GO:0016655,GO:0018636,GO:0030855,GO:0031406,GO:0032052,GO:0042448,GO:0044597,GO:0044598,GO:0047086,GO:0047115,GO:0051897,GO:0055114,GO:0071395,GO:0071799	alditol:NADP+ 1-oxidoreductase activity|cytoplasm|prostaglandin metabolic process|G-protein coupled receptor signaling pathway|digestion|steroid metabolic process|positive regulation of cell proliferation|oxidoreductase activity, acting on NAD(P)H, quinone or similar compound as acceptor|phenanthrene 9,10-monooxygenase activity|epithelial cell differentiation|carboxylic acid binding|bile acid bin…	hsa00140,hsa05204	Steroid hormone biosynthesis|Chemical carcinogenesis
AKR1C3	9.0739	2.79522	3.39498	8.52001	5.78064	4.34239	0.405122	0.26901	GeneID:8644,Genbank:NM_001253908.1,HGNC:HGNC:386,MIM:603966	aldo-keto reductase family 1 member C3			hsa00140,hsa00590,hsa00790,hsa04913	Steroid hormone biosynthesis|Arachidonic acid metabolism|Folate biosynthesis|Ovarian steroidogenesis
AKR7A2	7.27446	5.51903	6.30829	6.77282	13.8134	7.96207	0.595865	0.104361	GeneID:8574,Genbank:NM_001320979.1,HGNC:HGNC:389,MIM:603418	aldo-keto reductase family 7 member A2	GO:0004032,GO:0004033,GO:0005794,GO:0005829,GO:0005975,GO:0006081,GO:0006805,GO:0009055,GO:0019119,GO:0044597,GO:0044598,GO:0070062	alditol:NADP+ 1-oxidoreductase activity|aldo-keto reductase (NADP) activity|Golgi apparatus|cytosol|carbohydrate metabolic process|cellular aldehyde metabolic process|xenobiotic metabolic process|electron transfer activity|phenanthrene-9,10-epoxide hydrolase activity|daunorubicin metabolic process|doxorubicin metabolic process|extracellular exosome	hsa00980	Metabolism of xenobiotics by cytochrome P450
AKT1	24.9922	19.3829	16.4716	21.8445	19.6927	23.3135	0.155934	0.545972	GeneID:207,Genbank:NM_001014431.1,HGNC:HGNC:391,MIM:164730	AKT serine/threonine kinase 1			hsa01521,hsa01522,hsa01524,hsa04010,hsa04012,hsa04014,hsa04015,hsa04022,hsa04024,hsa04062,hsa04066,hsa04068,hsa04071,hsa04072,hsa04140,hsa04150,hsa04151,hsa04152,hsa04210,hsa04211,hsa04213,hsa04218,hsa04261,hsa04370,hsa04371,hsa04380,hsa04510,hsa04550,hsa04611,hsa04620,hsa04625,hsa04630,hsa04660,hsa04662,hsa04664,hsa04666,hsa04668,hsa04722,hsa04725,hsa04728,hsa04910,hsa04914,hsa04915,hsa04917,hsa…	EGFR tyrosine kinase inhibitor resistance|Endocrine resistance|Platinum drug resistance|MAPK signaling pathway|ErbB signaling pathway|Ras signaling pathway|Rap1 signaling pathway|cGMP-PKG signaling pathway|cAMP signaling pathway|Chemokine signaling pathway|HIF-1 signaling pathway|FoxO signaling pathway|Sphingolipid signaling pathway|Phospholipase D signaling pathway|Autophagy - animal|mTOR signal…
AKT1S1	4.68867	3.80025	3.83367	4.10213	3.5228	4.7398	0.0820419	0.7716	GeneID:84335,Genbank:NM_001278160.1,HGNC:HGNC:28426,MIM:610221	AKT1 substrate 1	GO:0005654,GO:0005737,GO:0005829,GO:0006469,GO:0032007,GO:0038202,GO:0042981,GO:0043234,GO:0043491,GO:0043523,GO:0045792,GO:0048011,GO:1900034	nucleoplasm|cytoplasm|cytosol|negative regulation of protein kinase activity|negative regulation of TOR signaling|TORC1 signaling|regulation of apoptotic process|protein complex|protein kinase B signaling|regulation of neuron apoptotic process|negative regulation of cell size|neurotrophin TRK receptor signaling pathway|regulation of cellular response to heat	hsa04140,hsa04150,hsa04152,hsa04211,hsa04213,hsa04714	Autophagy - animal|mTOR signaling pathway|AMPK signaling pathway|Longevity regulating pathway|Longevity regulating pathway - multiple species|Thermogenesis
AKT2	5.15927	4.18881	4.14584	4.66894	3.35376	3.85519	-0.180383	0.485155	GeneID:208,Genbank:NM_001243028.2,HGNC:HGNC:392,MIM:164731	AKT serine/threonine kinase 2			hsa01521,hsa01522,hsa01524,hsa04010,hsa04012,hsa04014,hsa04015,hsa04022,hsa04024,hsa04062,hsa04066,hsa04068,hsa04071,hsa04072,hsa04140,hsa04150,hsa04151,hsa04152,hsa04210,hsa04211,hsa04213,hsa04218,hsa04261,hsa04370,hsa04371,hsa04380,hsa04510,hsa04550,hsa04611,hsa04620,hsa04625,hsa04630,hsa04660,hsa04662,hsa04664,hsa04666,hsa04668,hsa04722,hsa04725,hsa04728,hsa04910,hsa04914,hsa04915,hsa04917,hsa…	EGFR tyrosine kinase inhibitor resistance|Endocrine resistance|Platinum drug resistance|MAPK signaling pathway|ErbB signaling pathway|Ras signaling pathway|Rap1 signaling pathway|cGMP-PKG signaling pathway|cAMP signaling pathway|Chemokine signaling pathway|HIF-1 signaling pathway|FoxO signaling pathway|Sphingolipid signaling pathway|Phospholipase D signaling pathway|Autophagy - animal|mTOR signal…
AKT3	5.76048	5.00496	5.7339	4.72636	1.45314	1.69543	-1.33857	0.000342106	GeneID:10000,Genbank:NM_181690.2,HGNC:HGNC:393,MIM:611223	AKT serine/threonine kinase 3	GO:0000002,GO:0004672,GO:0004674,GO:0005524,GO:0005622,GO:0005634,GO:0005737,GO:0005886,GO:0007165,GO:0010765,GO:0018105,GO:0018107,GO:0032008,GO:0032869,GO:0045793,GO:0048854,GO:0048873	mitochondrial genome maintenance|protein kinase activity|protein serine/threonine kinase activity|ATP binding|intracellular|nucleus|cytoplasm|plasma membrane|signal transduction|positive regulation of sodium ion transport|peptidyl-serine phosphorylation|peptidyl-threonine phosphorylation|positive regulation of TOR signaling|cellular response to insulin stimulus|positive regulation of cell size|br…	hsa01521,hsa01522,hsa01524,hsa04010,hsa04012,hsa04014,hsa04015,hsa04022,hsa04024,hsa04062,hsa04066,hsa04068,hsa04071,hsa04072,hsa04140,hsa04150,hsa04151,hsa04152,hsa04210,hsa04211,hsa04213,hsa04218,hsa04261,hsa04370,hsa04371,hsa04380,hsa04510,hsa04550,hsa04611,hsa04620,hsa04625,hsa04630,hsa04660,hsa04662,hsa04664,hsa04666,hsa04668,hsa04722,hsa04725,hsa04728,hsa04910,hsa04914,hsa04915,hsa04917,hsa…	EGFR tyrosine kinase inhibitor resistance|Endocrine resistance|Platinum drug resistance|MAPK signaling pathway|ErbB signaling pathway|Ras signaling pathway|Rap1 signaling pathway|cGMP-PKG signaling pathway|cAMP signaling pathway|Chemokine signaling pathway|HIF-1 signaling pathway|FoxO signaling pathway|Sphingolipid signaling pathway|Phospholipase D signaling pathway|Autophagy - animal|mTOR signal…
AKTIP	5.74632	4.78636	4.50822	5.32087	4.29317	3.04595	-0.3351	0.253681	GeneID:64400,Genbank:XM_005256098.5,HGNC:HGNC:16710,MIM:608483	AKT interacting protein	GO:0001934,GO:0005829,GO:0005886,GO:0006915,GO:0007032,GO:0007040,GO:0008333,GO:0015031,GO:0031625,GO:0032092,GO:0045022,GO:0061630,GO:0070695	positive regulation of protein phosphorylation|cytosol|plasma membrane|apoptotic process|endosome organization|lysosome organization|endosome to lysosome transport|protein transport|ubiquitin protein ligase binding|positive regulation of protein binding|early endosome to late endosome transport|ubiquitin protein ligase activity|FHF complex
ALAD	5.77288	4.78243	5.04898	5.16033	3.2399	7.01265	-0.0443211	0.886981	GeneID:210,Genbank:NM_000031.5,HGNC:HGNC:395,MIM:125270	aminolevulinate dehydratase			hsa00860	Porphyrin and chlorophyll metabolism
ALAS1	10.3772	13.091	10.5824	12.459	9.35255	21.9351	0.300659	0.378527	GeneID:211,Genbank:NM_000688.5,HGNC:HGNC:396,MIM:125290	5'-aminolevulinate synthase 1	GO:0003870,GO:0005654,GO:0005739,GO:0005759,GO:0005829,GO:0006782,GO:0006783,GO:0007005,GO:0019216,GO:0030170,GO:0042802	5-aminolevulinate synthase activity|nucleoplasm|mitochondrion|mitochondrial matrix|cytosol|protoporphyrinogen IX biosynthetic process|heme biosynthetic process|mitochondrion organization|regulation of lipid metabolic process|pyridoxal phosphate binding|identical protein binding	hsa00260,hsa00860	Glycine, serine and threonine metabolism|Porphyrin and chlorophyll metabolism
ALAS2	0.664531	1.63932	0.537963	0.149561	0.248887	0.0317123	-2.8631	1.67651e-05	GeneID:212,Genbank:NM_001037967.3,HGNC:HGNC:397,MIM:301300	5'-aminolevulinate synthase 2	GO:0001666,GO:0003870,GO:0005739,GO:0005743,GO:0005759,GO:0006782,GO:0006783,GO:0006879,GO:0016594,GO:0030170,GO:0030218,GO:0032364,GO:0042541,GO:0050662	response to hypoxia|5-aminolevulinate synthase activity|mitochondrion|mitochondrial inner membrane|mitochondrial matrix|protoporphyrinogen IX biosynthetic process|heme biosynthetic process|cellular iron ion homeostasis|glycine binding|pyridoxal phosphate binding|erythrocyte differentiation|oxygen homeostasis|hemoglobin biosynthetic process|coenzyme binding	hsa00260,hsa00860	Glycine, serine and threonine metabolism|Porphyrin and chlorophyll metabolism
ALCAM	31.2442	23.955	19.8156	23.2081	26.6565	18.2582	-0.17795	0.518602	GeneID:214,Genbank:NM_001627.3,HGNC:HGNC:400,MIM:601662	activated leukocyte cell adhesion molecule	GO:0001772,GO:0002250,GO:0005102,GO:0005887,GO:0005925,GO:0007155,GO:0007157,GO:0007165,GO:0008045,GO:0009897,GO:0030424,GO:0030425,GO:0031226,GO:0031290,GO:0042802,GO:0043025,GO:0048846,GO:0070062,GO:1990138	immunological synapse|adaptive immune response|receptor binding|integral component of plasma membrane|focal adhesion|cell adhesion|heterophilic cell-cell adhesion via plasma membrane cell adhesion molecules|signal transduction|motor neuron axon guidance|external side of plasma membrane|axon|dendrite|intrinsic component of plasma membrane|retinal ganglion cell axon guidance|identical protein bindi…	hsa04514	Cell adhesion molecules (CAMs)
ALDH16A1	5.99586	5.71308	4.14356	5.40613	3.58535	5.54405	-0.113853	0.727273	GeneID:126133,Genbank:NM_153329.3,HGNC:HGNC:28114,MIM:613358	aldehyde dehydrogenase 16 family member A1	GO:0004029,GO:0016020,GO:0070062	aldehyde dehydrogenase (NAD) activity|membrane|extracellular exosome
ALDH18A1	4.19489	3.98245	4.64166	6.1749	7.85367	8.08583	0.836247	0.00245695	GeneID:5832,Genbank:NM_001323419.1,HGNC:HGNC:9722,MIM:138250	aldehyde dehydrogenase 18 family member A1	GO:0003723,GO:0004349,GO:0004350,GO:0005524,GO:0005739,GO:0005743,GO:0005829,GO:0006536,GO:0006561,GO:0006592,GO:0008652,GO:0017084,GO:0019240,GO:0042802,GO:0055129	RNA binding|glutamate 5-kinase activity|glutamate-5-semialdehyde dehydrogenase activity|ATP binding|mitochondrion|mitochondrial inner membrane|cytosol|glutamate metabolic process|proline biosynthetic process|ornithine biosynthetic process|cellular amino acid biosynthetic process|delta1-pyrroline-5-carboxylate synthetase activity|citrulline biosynthetic process|identical protein binding|L-proline …	hsa00330	Arginine and proline metabolism
ALDH1A1	52.1295	41.6712	34.0577	51.3379	33.1146	11.4363	-0.666229	0.0686409	GeneID:216,Genbank:NM_000689.4,HGNC:HGNC:402,MIM:100640	aldehyde dehydrogenase 1 family member A1			hsa00830	Retinol metabolism
ALDH1A3	3.23009	3.22685	3.34451	2.02617	2.3523	3.3352	-0.414265	0.177594	GeneID:220,Genbank:NM_000693.3,HGNC:HGNC:409,MIM:600463	aldehyde dehydrogenase 1 family member A3	GO:0001758,GO:0002072,GO:0002138,GO:0004029,GO:0004030,GO:0005634,GO:0005737,GO:0005829,GO:0005886,GO:0007626,GO:0021768,GO:0031076,GO:0042472,GO:0042572,GO:0042573,GO:0042574,GO:0042803,GO:0043065,GO:0048048,GO:0050885,GO:0051289,GO:0060013,GO:0060166,GO:0060324,GO:0070062,GO:0070324,GO:0070384,GO:0070403	retinal dehydrogenase activity|optic cup morphogenesis involved in camera-type eye development|retinoic acid biosynthetic process|aldehyde dehydrogenase (NAD) activity|aldehyde dehydrogenase [NAD(P)+] activity|nucleus|cytoplasm|cytosol|plasma membrane|locomotory behavior|nucleus accumbens development|embryonic camera-type eye development|inner ear morphogenesis|retinol metabolic process|retinoic …	hsa00010,hsa00340,hsa00350,hsa00360,hsa00410,hsa00980,hsa00982,hsa05204	Glycolysis / Gluconeogenesis|Histidine metabolism|Tyrosine metabolism|Phenylalanine metabolism|beta-Alanine metabolism|Metabolism of xenobiotics by cytochrome P450|Drug metabolism - cytochrome P450|Chemical carcinogenesis
ALDH1B1	2.36276	2.03314	2.5319	1.86888	2.66785	3.43225	0.190788	0.556198	GeneID:219,Genbank:NM_000692.4,HGNC:HGNC:407,MIM:100670	aldehyde dehydrogenase 1 family member B1	GO:0004029,GO:0005654,GO:0005739,GO:0005759,GO:0005975,GO:0006068,GO:0006069,GO:0043231,GO:0051287	aldehyde dehydrogenase (NAD) activity|nucleoplasm|mitochondrion|mitochondrial matrix|carbohydrate metabolic process|ethanol catabolic process|ethanol oxidation|intracellular membrane-bounded organelle|NAD binding	hsa00010,hsa00053,hsa00071,hsa00280,hsa00310,hsa00330,hsa00340,hsa00380,hsa00410,hsa00561,hsa00620	Glycolysis / Gluconeogenesis|Ascorbate and aldarate metabolism|Fatty acid degradation|Valine, leucine and isoleucine degradation|Lysine degradation|Arginine and proline metabolism|Histidine metabolism|Tryptophan metabolism|beta-Alanine metabolism|Glycerolipid metabolism|Pyruvate metabolism
ALDH2	110.628	81.6604	77.0831	109.487	70.2062	99.7345	0.0807309	0.757709	GeneID:217,Genbank:NM_000690.3,HGNC:HGNC:404,MIM:100650	aldehyde dehydrogenase 2 family member			hsa00010,hsa00053,hsa00071,hsa00280,hsa00310,hsa00330,hsa00340,hsa00380,hsa00410,hsa00561,hsa00620	Glycolysis / Gluconeogenesis|Ascorbate and aldarate metabolism|Fatty acid degradation|Valine, leucine and isoleucine degradation|Lysine degradation|Arginine and proline metabolism|Histidine metabolism|Tryptophan metabolism|beta-Alanine metabolism|Glycerolipid metabolism|Pyruvate metabolism
ALDH3A1	0.801446	0.345314	0.451258	0.702611	1.15248	0.251007	0.112318	0.844283	GeneID:218,Genbank:NM_001330150.1,HGNC:HGNC:405,MIM:100660	aldehyde dehydrogenase 3 family member A1	GO:0004028,GO:0004029,GO:0004030,GO:0005615,GO:0005783,GO:0005829,GO:0005886,GO:0006081,GO:0006805,GO:0008106,GO:0016021,GO:0018479,GO:0055114	3-chloroallyl aldehyde dehydrogenase activity|aldehyde dehydrogenase (NAD) activity|aldehyde dehydrogenase [NAD(P)+] activity|extracellular space|endoplasmic reticulum|cytosol|plasma membrane|cellular aldehyde metabolic process|xenobiotic metabolic process|alcohol dehydrogenase (NADP+) activity|integral component of membrane|benzaldehyde dehydrogenase (NAD+) activity|oxidation-reduction process	hsa00010,hsa00340,hsa00350,hsa00360,hsa00410,hsa00980,hsa00982,hsa05204	Glycolysis / Gluconeogenesis|Histidine metabolism|Tyrosine metabolism|Phenylalanine metabolism|beta-Alanine metabolism|Metabolism of xenobiotics by cytochrome P450|Drug metabolism - cytochrome P450|Chemical carcinogenesis
ALDH3A2	21.8774	15.4051	17.167	17.0713	14.4232	20.1304	-0.105432	0.700106	GeneID:224,Genbank:XM_011523733.2,HGNC:HGNC:403,MIM:609523	aldehyde dehydrogenase 3 family member A2	GO:0001561,GO:0004029,GO:0004030,GO:0005743,GO:0005777,GO:0005778,GO:0005789,GO:0006081,GO:0006714,GO:0007417,GO:0007422,GO:0008544,GO:0016021,GO:0030148,GO:0033306,GO:0043231,GO:0046577,GO:0050061,GO:0052814,GO:0055114,GO:0070062	fatty acid alpha-oxidation|aldehyde dehydrogenase (NAD) activity|aldehyde dehydrogenase [NAD(P)+] activity|mitochondrial inner membrane|peroxisome|peroxisomal membrane|endoplasmic reticulum membrane|cellular aldehyde metabolic process|sesquiterpenoid metabolic process|central nervous system development|peripheral nervous system development|epidermis development|integral component of membrane|sphi…	hsa00010,hsa00053,hsa00071,hsa00280,hsa00310,hsa00330,hsa00340,hsa00380,hsa00410,hsa00561,hsa00620	Glycolysis / Gluconeogenesis|Ascorbate and aldarate metabolism|Fatty acid degradation|Valine, leucine and isoleucine degradation|Lysine degradation|Arginine and proline metabolism|Histidine metabolism|Tryptophan metabolism|beta-Alanine metabolism|Glycerolipid metabolism|Pyruvate metabolism
ALDH3B1	28.9284	18.1972	19.2563	19.1664	8.27999	27.8502	-0.336619	0.341941	GeneID:221,Genbank:NM_001161473.2,HGNC:HGNC:410,MIM:600466	aldehyde dehydrogenase 3 family member B1	GO:0004028,GO:0004029,GO:0004030,GO:0005737,GO:0005829,GO:0005886,GO:0006066,GO:0006068,GO:0006629,GO:0030148,GO:0030667,GO:0031982,GO:0034599,GO:0035579,GO:0043312,GO:0046185,GO:0055114,GO:0070062	3-chloroallyl aldehyde dehydrogenase activity|aldehyde dehydrogenase (NAD) activity|aldehyde dehydrogenase [NAD(P)+] activity|cytoplasm|cytosol|plasma membrane|alcohol metabolic process|ethanol catabolic process|lipid metabolic process|sphingolipid biosynthetic process|secretory granule membrane|vesicle|cellular response to oxidative stress|specific granule membrane|neutrophil degranulation|aldeh…	hsa00010,hsa00340,hsa00350,hsa00360,hsa00410,hsa00980,hsa00982,hsa05204	Glycolysis / Gluconeogenesis|Histidine metabolism|Tyrosine metabolism|Phenylalanine metabolism|beta-Alanine metabolism|Metabolism of xenobiotics by cytochrome P450|Drug metabolism - cytochrome P450|Chemical carcinogenesis
ALDH4A1	1.45098	1.73166	1.2524	1.30604	3.90437	3.17663	0.816299	0.0284435	GeneID:8659,Genbank:NM_001319218.1,HGNC:HGNC:406,MIM:606811	aldehyde dehydrogenase 4 family member A1	GO:0003842,GO:0004029,GO:0005759,GO:0006560,GO:0006562,GO:0009055,GO:0010133,GO:0019470,GO:0042802,GO:0046487	1-pyrroline-5-carboxylate dehydrogenase activity|aldehyde dehydrogenase (NAD) activity|mitochondrial matrix|proline metabolic process|proline catabolic process|electron transfer activity|proline catabolic process to glutamate|4-hydroxyproline catabolic process|identical protein binding|glyoxylate metabolic process	hsa00250,hsa00330	Alanine, aspartate and glutamate metabolism|Arginine and proline metabolism
ALDH5A1	3.79025	3.97119	4.3104	3.16622	11.2551	15.1242	1.03481	0.0160629	GeneID:7915,Genbank:NM_170740.1,HGNC:HGNC:408,MIM:610045	aldehyde dehydrogenase 5 family member A1	GO:0004777,GO:0005739,GO:0005759,GO:0006006,GO:0006083,GO:0006105,GO:0006536,GO:0006540,GO:0006541,GO:0006650,GO:0006678,GO:0006681,GO:0006749,GO:0007417,GO:0009013,GO:0009450,GO:0009791,GO:0022904,GO:0042135,GO:0042803,GO:0046459,GO:0051287,GO:0051289	succinate-semialdehyde dehydrogenase (NAD+) activity|mitochondrion|mitochondrial matrix|glucose metabolic process|acetate metabolic process|succinate metabolic process|glutamate metabolic process|glutamate decarboxylation to succinate|glutamine metabolic process|glycerophospholipid metabolic process|glucosylceramide metabolic process|galactosylceramide metabolic process|glutathione metabolic proc…	hsa00250,hsa00650	Alanine, aspartate and glutamate metabolism|Butanoate metabolism
ALDH6A1	5.57554	7.14963	5.11133	4.85012	13.6463	8.9847	0.537064	0.109015	GeneID:4329,Genbank:NM_001278593.1,HGNC:HGNC:7179,MIM:603178	aldehyde dehydrogenase 6 family member A1	GO:0000062,GO:0003723,GO:0004491,GO:0005654,GO:0005739,GO:0005759,GO:0006210,GO:0006573,GO:0006574,GO:0009083,GO:0018478,GO:0019859,GO:0050873,GO:0070062	fatty-acyl-CoA binding|RNA binding|methylmalonate-semialdehyde dehydrogenase (acylating) activity|nucleoplasm|mitochondrion|mitochondrial matrix|thymine catabolic process|valine metabolic process|valine catabolic process|branched-chain amino acid catabolic process|malonate-semialdehyde dehydrogenase (acetylating) activity|thymine metabolic process|brown fat cell differentiation|extracellular exos…	hsa00280,hsa00410,hsa00562,hsa00640	Valine, leucine and isoleucine degradation|beta-Alanine metabolism|Inositol phosphate metabolism|Propanoate metabolism
ALDH7A1	3.02023	2.6961	2.4612	2.50967	6.75162	2.79841	0.374546	0.332306	GeneID:501,Genbank:NM_001202404.1,HGNC:HGNC:877,MIM:107323	aldehyde dehydrogenase 7 family member A1	GO:0004029,GO:0004043,GO:0005634,GO:0005739,GO:0005759,GO:0005829,GO:0006081,GO:0006554,GO:0007605,GO:0008802,GO:0019285,GO:0042426,GO:0070062	aldehyde dehydrogenase (NAD) activity|L-aminoadipate-semialdehyde dehydrogenase activity|nucleus|mitochondrion|mitochondrial matrix|cytosol|cellular aldehyde metabolic process|lysine catabolic process|sensory perception of sound|betaine-aldehyde dehydrogenase activity|glycine betaine biosynthetic process from choline|choline catabolic process|extracellular exosome	hsa00010,hsa00053,hsa00071,hsa00260,hsa00280,hsa00310,hsa00330,hsa00340,hsa00380,hsa00410,hsa00561,hsa00620	Glycolysis / Gluconeogenesis|Ascorbate and aldarate metabolism|Fatty acid degradation|Glycine, serine and threonine metabolism|Valine, leucine and isoleucine degradation|Lysine degradation|Arginine and proline metabolism|Histidine metabolism|Tryptophan metabolism|beta-Alanine metabolism|Glycerolipid metabolism|Pyruvate metabolism
ALDH9A1	13.7425	11.3285	11.2991	12.6643	15.2793	30.237	0.56867	0.11717	GeneID:223,Genbank:NM_000696.3,HGNC:HGNC:412,MIM:602733	aldehyde dehydrogenase 9 family member A1	GO:0004028,GO:0004029,GO:0005737,GO:0005829,GO:0006081,GO:0019145,GO:0033737,GO:0042136,GO:0042445,GO:0045329,GO:0047105,GO:0055114,GO:0070062	3-chloroallyl aldehyde dehydrogenase activity|aldehyde dehydrogenase (NAD) activity|cytoplasm|cytosol|cellular aldehyde metabolic process|aminobutyraldehyde dehydrogenase activity|1-pyrroline dehydrogenase activity|neurotransmitter biosynthetic process|hormone metabolic process|carnitine biosynthetic process|4-trimethylammoniobutyraldehyde dehydrogenase activity|oxidation-reduction process|extrac…	hsa00010,hsa00053,hsa00071,hsa00280,hsa00310,hsa00330,hsa00340,hsa00380,hsa00410,hsa00561,hsa00620	Glycolysis / Gluconeogenesis|Ascorbate and aldarate metabolism|Fatty acid degradation|Valine, leucine and isoleucine degradation|Lysine degradation|Arginine and proline metabolism|Histidine metabolism|Tryptophan metabolism|beta-Alanine metabolism|Glycerolipid metabolism|Pyruvate metabolism
ALDOA	47.1815	37.2235	31.9426	51.1993	34.0723	60.0474	0.39416	0.17193	GeneID:226,Genbank:NM_001355564.1,HGNC:HGNC:414,MIM:103850	aldolase, fructose-bisphosphate A	GO:0002576,GO:0003723,GO:0003779,GO:0004332,GO:0005576,GO:0005615,GO:0005634,GO:0005829,GO:0006000,GO:0006094,GO:0006096,GO:0006754,GO:0006941,GO:0007015,GO:0007339,GO:0008092,GO:0008360,GO:0015629,GO:0015631,GO:0016020,GO:0030388,GO:0031093,GO:0031430,GO:0031674,GO:0034774,GO:0042802,GO:0043312,GO:0045296,GO:0046716,GO:0051289,GO:0061621,GO:0061827,GO:0070061,GO:0070062,GO:1904724,GO:1904813	platelet degranulation|RNA binding|actin binding|fructose-bisphosphate aldolase activity|extracellular region|extracellular space|nucleus|cytosol|fructose metabolic process|gluconeogenesis|glycolytic process|ATP biosynthetic process|striated muscle contraction|actin filament organization|binding of sperm to zona pellucida|cytoskeletal protein binding|regulation of cell shape|actin cytoskeleton|tu…	hsa00010,hsa00030,hsa00051,hsa04066	Glycolysis / Gluconeogenesis|Pentose phosphate pathway|Fructose and mannose metabolism|HIF-1 signaling pathway
ALDOC	2.55783	2.00549	2.07084	2.84467	3.54988	1.63567	0.204076	0.609398	GeneID:230,Genbank:XM_005257949.2,HGNC:HGNC:418,MIM:103870	aldolase, fructose-bisphosphate C	GO:0004332,GO:0005576,GO:0005739,GO:0005829,GO:0005856,GO:0006000,GO:0006094,GO:0008092,GO:0030388,GO:0030855,GO:0034774,GO:0043312,GO:0061621,GO:0070062,GO:1904724,GO:1904813	fructose-bisphosphate aldolase activity|extracellular region|mitochondrion|cytosol|cytoskeleton|fructose metabolic process|gluconeogenesis|cytoskeletal protein binding|fructose 1,6-bisphosphate metabolic process|epithelial cell differentiation|secretory granule lumen|neutrophil degranulation|canonical glycolysis|extracellular exosome|tertiary granule lumen|ficolin-1-rich granule lumen	hsa00010,hsa00030,hsa00051	Glycolysis / Gluconeogenesis|Pentose phosphate pathway|Fructose and mannose metabolism
ALG1	1.93271	2.19515	2.38146	2.7641	4.02994	3.89107	0.742367	0.0105621	GeneID:56052,Genbank:NM_019109.4,HGNC:HGNC:18294,MIM:605907	ALG1, chitobiosyldiphosphodolichol beta-mannosyltransferase	GO:0000030,GO:0004578,GO:0005783,GO:0005789,GO:0006486,GO:0006488,GO:0016020,GO:0016021	mannosyltransferase activity|chitobiosyldiphosphodolichol beta-mannosyltransferase activity|endoplasmic reticulum|endoplasmic reticulum membrane|protein glycosylation|dolichol-linked oligosaccharide biosynthetic process|membrane|integral component of membrane	hsa00510	N-Glycan biosynthesis
ALG10	1.84136	2.00928	1.98457	1.67816	1.28449	1.62946	-0.462456	0.111884	GeneID:84920,Genbank:NM_032834.3,HGNC:HGNC:23162,MIM:603313	ALG10, alpha-1,2-glucosyltransferase	GO:0004583,GO:0005789,GO:0006486,GO:0006488,GO:0016021,GO:0106073	dolichyl-phosphate-glucose-glycolipid alpha-glucosyltransferase activity|endoplasmic reticulum membrane|protein glycosylation|dolichol-linked oligosaccharide biosynthetic process|integral component of membrane|dolichyl pyrophosphate Glc2Man9GlcNAc2 alpha-1,2-glucosyltransferase activity	hsa00510	N-Glycan biosynthesis
ALG10B	1.3195	1.35184	1.71185	1.22492	1.19867	1.63594	-0.221126	0.449413	GeneID:144245,Genbank:XM_005268665.4,HGNC:HGNC:31088	ALG10B, alpha-1,2-glucosyltransferase	GO:0004583,GO:0005783,GO:0005789,GO:0005886,GO:0006486,GO:0006488,GO:0016021,GO:0016740,GO:0060050,GO:0106073,GO:1901980	dolichyl-phosphate-glucose-glycolipid alpha-glucosyltransferase activity|endoplasmic reticulum|endoplasmic reticulum membrane|plasma membrane|protein glycosylation|dolichol-linked oligosaccharide biosynthetic process|integral component of membrane|transferase activity|positive regulation of protein glycosylation|dolichyl pyrophosphate Glc2Man9GlcNAc2 alpha-1,2-glucosyltransferase activity|positiv…	hsa00510	N-Glycan biosynthesis
ALG11	3.8524	3.89769	3.50401	3.88567	2.82828	3.18486	-0.18581	0.59051	GeneID:440138,Genbank:NM_001004127.2,HGNC:HGNC:32456,MIM:613666	ALG11, alpha-1,2-mannosyltransferase	GO:0004377,GO:0005789,GO:0006490,GO:0016020,GO:0016021,GO:0033577	GDP-Man:Man3GlcNAc2-PP-Dol alpha-1,2-mannosyltransferase activity|endoplasmic reticulum membrane|oligosaccharide-lipid intermediate biosynthetic process|membrane|integral component of membrane|protein glycosylation in endoplasmic reticulum	hsa00510	N-Glycan biosynthesis
ALG12	5.3107	3.94435	4.01347	5.56871	9.12541	8.36557	0.786844	0.0164048	GeneID:79087,Genbank:XM_017028936.1,HGNC:HGNC:19358,MIM:607144	ALG12, alpha-1,6-mannosyltransferase	GO:0000030,GO:0005783,GO:0005789,GO:0006457,GO:0006487,GO:0006488,GO:0016020,GO:0016021,GO:0052917	mannosyltransferase activity|endoplasmic reticulum|endoplasmic reticulum membrane|protein folding|protein N-linked glycosylation|dolichol-linked oligosaccharide biosynthetic process|membrane|integral component of membrane|dol-P-Man:Man(7)GlcNAc(2)-PP-Dol alpha-1,6-mannosyltransferase activity	hsa00510	N-Glycan biosynthesis
ALG13	1.27178	1.06296	1.4012	1.32453	1.44782	0.905921	0.0259366	0.937062	GeneID:79868,Genbank:XM_006724698.3,HGNC:HGNC:30881,MIM:300776	ALG13, UDP-N-acetylglucosaminyltransferase subunit	GO:0003723,GO:0004577,GO:0006488,GO:0043541	RNA binding|N-acetylglucosaminyldiphosphodolichol N-acetylglucosaminyltransferase activity|dolichol-linked oligosaccharide biosynthetic process|UDP-N-acetylglucosamine transferase complex	hsa00510	N-Glycan biosynthesis
ALG14	0.692959	0.524371	0.579	0.832375	0.831674	1.1111	0.774405	0.0403517	GeneID:199857,Genbank:NM_144988.3,HGNC:HGNC:28287,MIM:612866	ALG14, UDP-N-acetylglucosaminyltransferase subunit	GO:0004577,GO:0005789,GO:0006488,GO:0016021,GO:0031965	N-acetylglucosaminyldiphosphodolichol N-acetylglucosaminyltransferase activity|endoplasmic reticulum membrane|dolichol-linked oligosaccharide biosynthetic process|integral component of membrane|nuclear membrane	hsa00510	N-Glycan biosynthesis
ALG2	8.43905	7.99986	7.95159	9.45774	8.08746	10.2453	0.155853	0.562893	GeneID:85365,Genbank:NM_033087.3,HGNC:HGNC:23159,MIM:607905	ALG2, alpha-1,3/1,6-mannosyltransferase	GO:0000033,GO:0004378,GO:0005634,GO:0005737,GO:0005789,GO:0005829,GO:0006488,GO:0015629,GO:0016020,GO:0016021,GO:0033577,GO:0046982,GO:0047485,GO:0048306,GO:0048471,GO:0051592,GO:0102704	alpha-1,3-mannosyltransferase activity|GDP-Man:Man1GlcNAc2-PP-Dol alpha-1,3-mannosyltransferase activity|nucleus|cytoplasm|endoplasmic reticulum membrane|cytosol|dolichol-linked oligosaccharide biosynthetic process|actin cytoskeleton|membrane|integral component of membrane|protein glycosylation in endoplasmic reticulum|protein heterodimerization activity|protein N-terminus binding|calcium-depende…	hsa00510	N-Glycan biosynthesis
ALG3	1.9674	1.74551	1.82021	2.64509	2.15906	2.78766	0.533424	0.0768142	GeneID:10195,Genbank:NM_001006941.2,HGNC:HGNC:23056,MIM:608750	ALG3, alpha-1,3- mannosyltransferase	GO:0000033,GO:0005789,GO:0006486,GO:0006488,GO:0016021,GO:0052925	alpha-1,3-mannosyltransferase activity|endoplasmic reticulum membrane|protein glycosylation|dolichol-linked oligosaccharide biosynthetic process|integral component of membrane|dol-P-Man:Man(5)GlcNAc(2)-PP-Dol alpha-1,3-mannosyltransferase activity	hsa00510	N-Glycan biosynthesis
ALG5	8.04534	6.47854	6.4228	8.40916	6.96335	6.41305	0.062828	0.82492	GeneID:29880,Genbank:NM_001142364.1,HGNC:HGNC:20266,MIM:604565	ALG5, dolichyl-phosphate beta-glucosyltransferase	GO:0004576,GO:0004581,GO:0005789,GO:0006486,GO:0006487,GO:0007368,GO:0016020,GO:0016021,GO:0018279	oligosaccharyl transferase activity|dolichyl-phosphate beta-glucosyltransferase activity|endoplasmic reticulum membrane|protein glycosylation|protein N-linked glycosylation|determination of left/right symmetry|membrane|integral component of membrane|protein N-linked glycosylation via asparagine	hsa00510	N-Glycan biosynthesis
ALG6	2.1613	2.05144	2.58912	2.57824	2.20862	4.09353	0.312485	0.341504	GeneID:29929,Genbank:NM_013339.3,HGNC:HGNC:23157,MIM:604566	ALG6, alpha-1,3-glucosyltransferase	GO:0004583,GO:0005789,GO:0006487,GO:0006488,GO:0006490,GO:0016020,GO:0016021,GO:0042281,GO:0046527	dolichyl-phosphate-glucose-glycolipid alpha-glucosyltransferase activity|endoplasmic reticulum membrane|protein N-linked glycosylation|dolichol-linked oligosaccharide biosynthetic process|oligosaccharide-lipid intermediate biosynthetic process|membrane|integral component of membrane|dolichyl pyrophosphate Man9GlcNAc2 alpha-1,3-glucosyltransferase activity|glucosyltransferase activity	hsa00510	N-Glycan biosynthesis
ALG8	3.02487	2.77965	2.74684	3.2742	3.46287	4.32519	0.273969	0.372145	GeneID:79053,Genbank:NM_024079.4,HGNC:HGNC:23161,MIM:608103	ALG8, alpha-1,3-glucosyltransferase	GO:0000033,GO:0004583,GO:0005789,GO:0006487,GO:0006488,GO:0006490,GO:0016021,GO:0042281	alpha-1,3-mannosyltransferase activity|dolichyl-phosphate-glucose-glycolipid alpha-glucosyltransferase activity|endoplasmic reticulum membrane|protein N-linked glycosylation|dolichol-linked oligosaccharide biosynthetic process|oligosaccharide-lipid intermediate biosynthetic process|integral component of membrane|dolichyl pyrophosphate Man9GlcNAc2 alpha-1,3-glucosyltransferase activity	hsa00510	N-Glycan biosynthesis
ALG9	1.59652	1.29951	1.50813	1.44076	1.60597	1.53965	0.0942113	0.74204	GeneID:79796,Genbank:NM_001352409.1,HGNC:HGNC:15672,MIM:606941	ALG9, alpha-1,2-mannosyltransferase	GO:0000026,GO:0000030,GO:0005783,GO:0005789,GO:0006486,GO:0006488,GO:0016020,GO:0016021,GO:0052918,GO:0052926	alpha-1,2-mannosyltransferase activity|mannosyltransferase activity|endoplasmic reticulum|endoplasmic reticulum membrane|protein glycosylation|dolichol-linked oligosaccharide biosynthetic process|membrane|integral component of membrane|dol-P-Man:Man(8)GlcNAc(2)-PP-Dol alpha-1,2-mannosyltransferase activity|dol-P-Man:Man(6)GlcNAc(2)-PP-Dol alpha-1,2-mannosyltransferase activity	hsa00510	N-Glycan biosynthesis
ALKAL1	0.0280821	0.190835	0.665445	0.564648	1.37356	1.15449	2.62901	0.00347391	GeneID:389658,Genbank:NM_207413.3,HGNC:HGNC:33775	ALK and LTK ligand 1	GO:0005576,GO:0010976,GO:0030298,GO:0030971,GO:0070374,GO:0070378	extracellular region|positive regulation of neuron projection development|receptor signaling protein tyrosine kinase activator activity|receptor tyrosine kinase binding|positive regulation of ERK1 and ERK2 cascade|positive regulation of ERK5 cascade
ALKAL2	1.00189	1.54134	1.1389	1.20972	0.389051	0.629819	-0.861785	0.188562	GeneID:285016,Genbank:XM_011510342.3,HGNC:HGNC:27683	ALK and LTK ligand 2	GO:0005576,GO:0010976,GO:0030298,GO:0030971,GO:0070374,GO:0070378	extracellular region|positive regulation of neuron projection development|receptor signaling protein tyrosine kinase activator activity|receptor tyrosine kinase binding|positive regulation of ERK1 and ERK2 cascade|positive regulation of ERK5 cascade
ALKBH1	2.12498	1.82258	1.56428	2.01372	2.47049	1.79843	0.16828	0.60403	GeneID:8846,Genbank:NM_006020.2,HGNC:HGNC:17911,MIM:605345	alkB homolog 1, histone H2A dioxygenase	GO:0000049,GO:0001701,GO:0001764,GO:0001890,GO:0002101,GO:0003906,GO:0005719,GO:0005739,GO:0006281,GO:0006307,GO:0006446,GO:0006448,GO:0008198,GO:0016706,GO:0031175,GO:0035552,GO:0042056,GO:0042245,GO:0043524,GO:0043734,GO:0048589,GO:0070129,GO:0070579,GO:0070989,GO:0080111,GO:0103053,GO:0140078,GO:0140080,GO:1990983,GO:1990984	tRNA binding|in utero embryonic development|neuron migration|placenta development|tRNA wobble cytosine modification|DNA-(apurinic or apyrimidinic site) lyase activity|nuclear euchromatin|mitochondrion|DNA repair|DNA dealkylation involved in DNA repair|regulation of translational initiation|regulation of translational elongation|ferrous iron binding|oxidoreductase activity, acting on paired donors…
ALKBH2	1.65515	1.13454	1.32259	1.30282	0.819051	2.45348	0.196285	0.675076	GeneID:121642,Genbank:NM_001145375.1,HGNC:HGNC:32487,MIM:610602	alkB homolog 2, alpha-ketoglutarate dependent dioxygenase	GO:0005634,GO:0005654,GO:0006307,GO:0008198,GO:0015630,GO:0035511,GO:0043734,GO:0051747,GO:0070989,GO:0080111,GO:0103053	nucleus|nucleoplasm|DNA dealkylation involved in DNA repair|ferrous iron binding|microtubule cytoskeleton|oxidative DNA demethylation|DNA-N1-methyladenine dioxygenase activity|cytosine C-5 DNA demethylase activity|oxidative demethylation|DNA demethylation|1-ethyladenine demethylase activity
ALKBH3	2.82285	2.42923	2.16225	3.23238	2.48674	3.81436	0.289315	0.37914	GeneID:221120,Genbank:NM_139178.3,HGNC:HGNC:30141,MIM:610603	alkB homolog 3, alpha-ketoglutaratedependent dioxygenase
ALKBH4	1.93272	1.67609	1.48607	2.22894	3.28137	3.16434	0.851735	0.0142414	GeneID:54784,Genbank:NM_017621.3,HGNC:HGNC:21900,MIM:613302	alkB homolog 4, lysine demethylase	GO:0003779,GO:0005634,GO:0005737,GO:0006351,GO:0006355,GO:0006482,GO:0016706,GO:0030496,GO:0031032,GO:0032451,GO:0036090,GO:0046872,GO:0070938	actin binding|nucleus|cytoplasm|transcription, DNA-templated|regulation of transcription, DNA-templated|protein demethylation|oxidoreductase activity, acting on paired donors, with incorporation or reduction of molecular oxygen, 2-oxoglutarate as one donor, and incorporation of one atom each of oxygen into both donors|midbody|actomyosin structure organization|demethylase activity|cleavage furrow …
ALKBH5	31.503	27.6014	23.7602	25.6519	18.6562	31.0178	-0.10676	0.711712	GeneID:54890,Genbank:NM_017758.3,HGNC:HGNC:25996,MIM:613303	alkB homolog 5, RNA demethylase	GO:0001666,GO:0003723,GO:0005634,GO:0005654,GO:0005794,GO:0005829,GO:0006307,GO:0006397,GO:0006406,GO:0007283,GO:0016607,GO:0016706,GO:0030154,GO:0035515,GO:0035553,GO:0046872	response to hypoxia|RNA binding|nucleus|nucleoplasm|Golgi apparatus|cytosol|DNA dealkylation involved in DNA repair|mRNA processing|mRNA export from nucleus|spermatogenesis|nuclear speck|oxidoreductase activity, acting on paired donors, with incorporation or reduction of molecular oxygen, 2-oxoglutarate as one donor, and incorporation of one atom each of oxygen into both donors|cell differentiati…
ALKBH6	0.946178	0.835382	0.943953	1.20874	0.800316	1.01417	-0.0394819	0.919351	GeneID:84964,Genbank:NM_001297701.1,HGNC:HGNC:28243,MIM:613304	alkB homolog 6	GO:0005634,GO:0005654,GO:0005737,GO:0005925,GO:0008198,GO:0051213	nucleus|nucleoplasm|cytoplasm|focal adhesion|ferrous iron binding|dioxygenase activity
ALKBH7	5.64104	4.39833	5.33798	5.78148	5.42709	10.8765	0.460279	0.145984	GeneID:84266,Genbank:NM_032306.3,HGNC:HGNC:21306,MIM:613305	alkB homolog 7	GO:0005759,GO:0006631,GO:0006974,GO:0010883,GO:0046872,GO:0051213,GO:1902445	mitochondrial matrix|fatty acid metabolic process|cellular response to DNA damage stimulus|regulation of lipid storage|metal ion binding|dioxygenase activity|regulation of mitochondrial membrane permeability involved in programmed necrotic cell death
ALKBH8	1.13334	1.36311	1.25468	1.37573	1.14667	1.38478	0.00255399	0.993489	GeneID:91801,Genbank:XM_017018555.1,HGNC:HGNC:25189,MIM:613306	alkB homolog 8, tRNA methyltransferase	GO:0000049,GO:0002098,GO:0005506,GO:0005634,GO:0005654,GO:0005829,GO:0006974,GO:0008198,GO:0008270,GO:0016300,GO:0016604,GO:0016706,GO:0030488,GO:0055114	tRNA binding|tRNA wobble uridine modification|iron ion binding|nucleus|nucleoplasm|cytosol|cellular response to DNA damage stimulus|ferrous iron binding|zinc ion binding|tRNA (uracil) methyltransferase activity|nuclear body|oxidoreductase activity, acting on paired donors, with incorporation or reduction of molecular oxygen, 2-oxoglutarate as one donor, and incorporation of one atom each of oxyge…
ALMS1	3.89898	3.05827	3.39797	3.00555	3.62366	2.98566	-0.125255	0.660798	GeneID:7840,Genbank:NM_015120.4,HGNC:HGNC:428,MIM:606844	ALMS1, centrosome and basal body associated protein	GO:0000086,GO:0000922,GO:0005813,GO:0005829,GO:0005929,GO:0010389,GO:0016197,GO:0051393,GO:0051492,GO:0097711	G2/M transition of mitotic cell cycle|spindle pole|centrosome|cytosol|cilium|regulation of G2/M transition of mitotic cell cycle|endosomal transport|alpha-actinin binding|regulation of stress fiber assembly|ciliary basal body-plasma membrane docking
ALOX15	4.8371	0.294519	0.815269	1.45868	1.35595	1.03994	0.175148	0.788977	GeneID:246,Genbank:NM_001140.4,HGNC:HGNC:433,MIM:152392	arachidonate 15-lipoxygenase			hsa00590,hsa00591,hsa04216,hsa04217,hsa04726	Arachidonic acid metabolism|Linoleic acid metabolism|Ferroptosis|Necroptosis|Serotonergic synapse
ALOX15B	13.5318	5.72274	4.12589	9.93259	1.88073	5.32192	-0.440647	0.245366	GeneID:247,Genbank:NM_001141.2,HGNC:HGNC:434,MIM:603697	arachidonate 15-lipoxygenase, type B	GO:0005506,GO:0005509,GO:0005622,GO:0005634,GO:0005829,GO:0005856,GO:0005886,GO:0006629,GO:0006915,GO:0008285,GO:0008289,GO:0010744,GO:0016020,GO:0016165,GO:0019369,GO:0019372,GO:0019898,GO:0030336,GO:0030850,GO:0030856,GO:0035360,GO:0036403,GO:0043651,GO:0045618,GO:0045786,GO:0045926,GO:0050473,GO:0051122,GO:0070062,GO:0090197	iron ion binding|calcium ion binding|intracellular|nucleus|cytosol|cytoskeleton|plasma membrane|lipid metabolic process|apoptotic process|negative regulation of cell proliferation|lipid binding|positive regulation of macrophage derived foam cell differentiation|membrane|linoleate 13S-lipoxygenase activity|arachidonic acid metabolic process|lipoxygenase pathway|extrinsic component of membrane|nega…	hsa00590,hsa04726	Arachidonic acid metabolism|Serotonergic synapse
ALOX5	23.6568	20.3352	19.1298	27.7688	7.42091	16.2811	-0.460292	0.235343	GeneID:240,Genbank:NM_001320862.1,HGNC:HGNC:435,MIM:152390	arachidonate 5-lipoxygenase			hsa00590,hsa04664,hsa04726,hsa04913,hsa05145	Arachidonic acid metabolism|Fc epsilon RI signaling pathway|Serotonergic synapse|Ovarian steroidogenesis|Toxoplasmosis
ALOX5AP	14.8804	13.8646	11.8304	17.5068	5.71219	11.8379	-0.280621	0.460671	GeneID:241,Genbank:NM_001204406.1,HGNC:HGNC:436,MIM:603700	arachidonate 5-lipoxygenase activating protein			hsa04664	Fc epsilon RI signaling pathway
ALPK1	1.56742	1.48573	1.47925	1.69034	1.53201	1.39634	0.0385959	0.885811	GeneID:80216,Genbank:XM_017008638.2,HGNC:HGNC:20917,MIM:607347	alpha kinase 1	GO:0004674,GO:0005524,GO:0005737	protein serine/threonine kinase activity|ATP binding|cytoplasm
ALPK3	2.82434	2.41051	2.1906	1.80616	0.882869	0.682427	-1.28592	0.000471133	GeneID:57538,Genbank:NM_020778.4,HGNC:HGNC:17574,MIM:617608	alpha kinase 3	GO:0004674,GO:0005524,GO:0005634,GO:0007507	protein serine/threonine kinase activity|ATP binding|nucleus|heart development
ALPL	29.7736	14.0378	16.2592	30.8985	64.5418	70.9327	1.5663	0.000189807	GeneID:249,Genbank:XM_005245818.1,HGNC:HGNC:438,MIM:171760	alkaline phosphatase, liver/bone/kidney			hsa00730,hsa00790	Thiamine metabolism|Folate biosynthesis
ALPP	1.18191	0.417614	0.72164	1.37238	0.0413621	0.0221009	-2.24597	0.00747751	GeneID:250,Genbank:NM_001632.4,HGNC:HGNC:439,MIM:171800	alkaline phosphatase, placental			hsa00730,hsa00790	Thiamine metabolism|Folate biosynthesis
ALS2	1.57118	1.73896	1.81717	1.73612	1.39365	1.52703	-0.178075	0.515152	GeneID:57679,Genbank:NM_020919.3,HGNC:HGNC:443,MIM:606352	ALS2, alsin Rho guanine nucleotide exchange factor			hsa05014	Amyotrophic lateral sclerosis (ALS)
ALS2CL	6.94369	5.56572	5.16201	5.5204	1.91877	4.53312	-0.595848	0.093664	GeneID:259173,Genbank:NM_147129.4,HGNC:HGNC:20605,MIM:612402	ALS2 C-terminal like	GO:0005096,GO:0005829,GO:0007032,GO:0017112,GO:0042802	GTPase activator activity|cytosol|endosome organization|Rab guanyl-nucleotide exchange factor activity|identical protein binding
ALYREF	10.4937	9.14387	7.16584	10.3702	10.6255	8.86779	0.179885	0.535406	GeneID:10189,Genbank:NM_005782.3,HGNC:HGNC:19071,MIM:604171	Aly/REF export factor	GO:0000018,GO:0000346,GO:0000398,GO:0001649,GO:0003723,GO:0005654,GO:0005829,GO:0006369,GO:0006405,GO:0006406,GO:0016020,GO:0016032,GO:0016607,GO:0031124,GO:0031297,GO:0032786,GO:0046784,GO:0070062,GO:0071013	regulation of DNA recombination|transcription export complex|mRNA splicing, via spliceosome|osteoblast differentiation|RNA binding|nucleoplasm|cytosol|termination of RNA polymerase II transcription|RNA export from nucleus|mRNA export from nucleus|membrane|viral process|nuclear speck|mRNA 3'-end processing|replication fork processing|positive regulation of DNA-templated transcription, elongation|v…	hsa03013,hsa03015,hsa03040,hsa05168	RNA transport|mRNA surveillance pathway|Spliceosome|Herpes simplex infection
AMACR	2.60374	2.2264	3.40745	3.002	7.76818	3.51989	0.623832	0.152439	GeneID:23600,Genbank:NM_203382.2,HGNC:HGNC:451,MIM:604489	alpha-methylacyl-CoA racemase	GO:0005102,GO:0005737,GO:0005739,GO:0005777,GO:0005782,GO:0005886,GO:0006699,GO:0008111,GO:0008206,GO:0033540,GO:0043231	receptor binding|cytoplasm|mitochondrion|peroxisome|peroxisomal matrix|plasma membrane|bile acid biosynthetic process|alpha-methylacyl-CoA racemase activity|bile acid metabolic process|fatty acid beta-oxidation using acyl-CoA oxidase|intracellular membrane-bounded organelle	hsa00120,hsa04146	Primary bile acid biosynthesis|Peroxisome
AMBP	0.0886061	0.110111	0.132119	0.695647	1.72223	0.0779619	2.20034	0.0223636	GeneID:259,Genbank:NM_001633.3,HGNC:HGNC:453,MIM:176870	alpha-1-microglobulin/bikunin precursor	GO:0004867,GO:0005576,GO:0005615,GO:0005886,GO:0006898,GO:0007155,GO:0007565,GO:0009986,GO:0016032,GO:0018298,GO:0019855,GO:0019862,GO:0020037,GO:0030163,GO:0031012,GO:0042167,GO:0042803,GO:0043231,GO:0046329,GO:0046904,GO:0050777,GO:0070062,GO:0072562	serine-type endopeptidase inhibitor activity|extracellular region|extracellular space|plasma membrane|receptor-mediated endocytosis|cell adhesion|female pregnancy|cell surface|viral process|protein-chromophore linkage|calcium channel inhibitor activity|IgA binding|heme binding|protein catabolic process|extracellular matrix|heme catabolic process|protein homodimerization activity|intracellular mem…
AMBRA1	3.30617	3.73387	3.29653	3.57293	4.14992	3.92134	0.192831	0.450774	GeneID:55626,Genbank:NM_001267783.1,HGNC:HGNC:25990,MIM:611359	autophagy and beclin 1 regulator 1	GO:0000045,GO:0000422,GO:0000423,GO:0005737,GO:0005739,GO:0005741,GO:0005776,GO:0005829,GO:0005930,GO:0008285,GO:0009267,GO:0010508,GO:0010667,GO:0016236,GO:0021915,GO:0030154,GO:0031625,GO:0043524,GO:0043552,GO:0045335,GO:0048471,GO:0051020,GO:0098780	autophagosome assembly|autophagy of mitochondrion|mitophagy|cytoplasm|mitochondrion|mitochondrial outer membrane|autophagosome|cytosol|axoneme|negative regulation of cell proliferation|cellular response to starvation|positive regulation of autophagy|negative regulation of cardiac muscle cell apoptotic process|macroautophagy|neural tube development|cell differentiation|ubiquitin protein ligase bin…	hsa04137,hsa04140	Mitophagy - animal|Autophagy - animal
AMD1	24.1199	17.4724	13.4028	20.5601	12.8148	14.1419	-0.272306	0.31433	GeneID:262,Genbank:NM_001287215.1,HGNC:HGNC:457,MIM:180980	adenosylmethionine decarboxylase 1	GO:0004014,GO:0005829,GO:0006557,GO:0006595,GO:0006597,GO:0008295,GO:0019810	adenosylmethionine decarboxylase activity|cytosol|S-adenosylmethioninamine biosynthetic process|polyamine metabolic process|spermine biosynthetic process|spermidine biosynthetic process|putrescine binding	hsa00270,hsa00330	Cysteine and methionine metabolism|Arginine and proline metabolism
AMDHD2	3.59344	3.63165	3.03034	3.84476	2.71963	2.61412	-0.14858	0.640785	GeneID:51005,Genbank:NM_001330449.1,HGNC:HGNC:24262	amidohydrolase domain containing 2	GO:0005634,GO:0005829,GO:0005975,GO:0006046,GO:0006048,GO:0008448,GO:0019262,GO:0046872	nucleus|cytosol|carbohydrate metabolic process|N-acetylglucosamine catabolic process|UDP-N-acetylglucosamine biosynthetic process|N-acetylglucosamine-6-phosphate deacetylase activity|N-acetylneuraminate catabolic process|metal ion binding	hsa00520	Amino sugar and nucleotide sugar metabolism
AMER1	0.995265	0.98691	0.877826	0.872319	1.70033	1.37078	0.444991	0.19353	GeneID:139285,Genbank:NM_152424.3,HGNC:HGNC:26837,MIM:300647	APC membrane recruitment protein 1
AMFR	12.8818	12.0285	10.5253	11.6793	8.16798	6.56734	-0.460439	0.1012	GeneID:267,Genbank:NM_001144.5,HGNC:HGNC:463,MIM:603243	autocrine motility factor receptor			hsa04141	Protein processing in endoplasmic reticulum
AMIGO1	2.1514	1.8986	2.03845	1.47958	2.13064	6.40912	0.428489	0.331208	GeneID:57463,Genbank:NM_020703.3,HGNC:HGNC:20824,MIM:615689	adhesion molecule with Ig like domain 1	GO:0007156,GO:0007157,GO:0007409,GO:0007413,GO:0008076,GO:0015459,GO:0030424,GO:0030425,GO:0032809,GO:0042552,GO:0043204,GO:0050772,GO:0051965,GO:1901381	homophilic cell adhesion via plasma membrane adhesion molecules|heterophilic cell-cell adhesion via plasma membrane cell adhesion molecules|axonogenesis|axonal fasciculation|voltage-gated potassium channel complex|potassium channel regulator activity|axon|dendrite|neuronal cell body membrane|myelination|perikaryon|positive regulation of axonogenesis|positive regulation of synapse assembly|positiv…
AMIGO2	6.69568	6.74486	6.45375	6.0585	3.99361	5.13596	-0.460566	0.103425	GeneID:347902,Genbank:NM_181847.4,HGNC:HGNC:24073,MIM:615690	adhesion molecule with Ig like domain 2	GO:0005634,GO:0005886,GO:0007156,GO:0007157,GO:0016021,GO:0043066,GO:0043069,GO:0051965	nucleus|plasma membrane|homophilic cell adhesion via plasma membrane adhesion molecules|heterophilic cell-cell adhesion via plasma membrane cell adhesion molecules|integral component of membrane|negative regulation of apoptotic process|negative regulation of programmed cell death|positive regulation of synapse assembly
AMMECR1	2.04579	1.8484	2.02819	2.00627	6.01165	3.09985	0.687445	0.092618	GeneID:9949,Genbank:NM_001171689.1,HGNC:HGNC:467,MIM:300195	Alport syndrome, mental retardation, midface hypoplasia and elliptocytosis chromosomal region gene 1	GO:0005634	nucleus
AMMECR1L	3.45348	2.94	3.06009	2.41946	2.91376	3.29497	-0.117806	0.670948	GeneID:83607,Genbank:XM_011511952.3,HGNC:HGNC:28658	AMMECR1 like
AMOT	2.1323	1.74828	2.31778	1.76388	7.26336	2.33343	0.544458	0.255888	GeneID:154796,Genbank:XM_011530875.2,HGNC:HGNC:17810,MIM:300410	angiomotin			hsa04390,hsa04530	Hippo signaling pathway|Tight junction
AMOTL1	12.1774	11.5122	9.82018	7.68856	5.53489	9.71052	-0.564432	0.0582544	GeneID:154810,Genbank:XM_006718772.3,HGNC:HGNC:17811,MIM:614657	angiomotin like 1	GO:0003365,GO:0005829,GO:0005923,GO:0016055,GO:0016324,GO:0030027,GO:0031410,GO:0035329,GO:0042802,GO:0043536	establishment of cell polarity involved in ameboidal cell migration|cytosol|bicellular tight junction|Wnt signaling pathway|apical plasma membrane|lamellipodium|cytoplasmic vesicle|hippo signaling|identical protein binding|positive regulation of blood vessel endothelial cell migration	hsa04530	Tight junction
AMOTL2	14.0041	14.7814	13.3515	8.07516	5.31498	11.3116	-0.780309	0.0123622	GeneID:51421,Genbank:NM_001278683.1,HGNC:HGNC:17812,MIM:614658	angiomotin like 2	GO:0005829,GO:0005923,GO:0016055,GO:0016324,GO:0035329,GO:0042802,GO:0055037	cytosol|bicellular tight junction|Wnt signaling pathway|apical plasma membrane|hippo signaling|identical protein binding|recycling endosome	hsa04530	Tight junction
AMPD2	2.72496	2.92368	3.21878	3.71721	3.65184	4.58163	0.43171	0.11563	GeneID:271,Genbank:NM_001257360.1,HGNC:HGNC:469,MIM:102771	adenosine monophosphate deaminase 2	GO:0003876,GO:0005829,GO:0006188,GO:0032264,GO:0043101,GO:0046872,GO:0052652,GO:0097009	AMP deaminase activity|cytosol|IMP biosynthetic process|IMP salvage|purine-containing compound salvage|metal ion binding|cyclic purine nucleotide metabolic process|energy homeostasis	hsa00230	Purine metabolism
AMPD3	1.4921	1.51481	1.11987	1.60774	1.06223	0.802518	-0.319188	0.336129	GeneID:272,Genbank:NM_001172431.1,HGNC:HGNC:470,MIM:102772	adenosine monophosphate deaminase 3	GO:0003876,GO:0005576,GO:0005829,GO:0006196,GO:0032264,GO:0034101,GO:0034774,GO:0043101,GO:0043312,GO:0046031,GO:0046034,GO:0046039,GO:0046872,GO:0097009,GO:1904813	AMP deaminase activity|extracellular region|cytosol|AMP catabolic process|IMP salvage|erythrocyte homeostasis|secretory granule lumen|purine-containing compound salvage|neutrophil degranulation|ADP metabolic process|ATP metabolic process|GTP metabolic process|metal ion binding|energy homeostasis|ficolin-1-rich granule lumen	hsa00230	Purine metabolism
AMT	2.7915	2.14301	2.53704	2.77113	2.29984	1.78874	-0.0481147	0.884633	GeneID:275,Genbank:NM_001164711.1,HGNC:HGNC:473,MIM:238310	aminomethyltransferase	GO:0004047,GO:0005654,GO:0005739,GO:0005759,GO:0006546,GO:0008483,GO:0019464	aminomethyltransferase activity|nucleoplasm|mitochondrion|mitochondrial matrix|glycine catabolic process|transaminase activity|glycine decarboxylation via glycine cleavage system	hsa00260,hsa00630,hsa00670	Glycine, serine and threonine metabolism|Glyoxylate and dicarboxylate metabolism|One carbon pool by folate
AMY1A	0.209244	0.086586	0.146718	0.103444	1.08231	0.136991	1.00106	0.335337	GeneID:276,Genbank:NM_001008221.1,HGNC:HGNC:474,MIM:104700	amylase, alpha 1A (salivary)			hsa00500,hsa04970,hsa04973	Starch and sucrose metabolism|Salivary secretion|Carbohydrate digestion and absorption
AMY1B	0.785713	0.0977543	0.557633	0.172878	1.48013	0.327998	0.972293	0.244728	GeneID:277,Genbank:XM_011541262.1,HGNC:HGNC:475,MIM:104701	amylase, alpha 1B (salivary)			hsa00500,hsa04970,hsa04973	Starch and sucrose metabolism|Salivary secretion|Carbohydrate digestion and absorption
AMY2B	4.94412	3.67316	3.94402	4.79494	5.0517	2.44999	-0.164394	0.654405	GeneID:280,Genbank:NM_020978.4,HGNC:HGNC:478,MIM:104660	amylase, alpha 2B (pancreatic)	GO:0004556,GO:0005975,GO:0007586,GO:0046872,GO:0070062,GO:0103025	alpha-amylase activity|carbohydrate metabolic process|digestion|metal ion binding|extracellular exosome|alpha-amylase activity (releasing maltohexaose)	hsa00500,hsa04972,hsa04973	Starch and sucrose metabolism|Pancreatic secretion|Carbohydrate digestion and absorption
AMZ2	7.04393	5.47394	4.90503	5.87491	6.31698	6.07236	0.134659	0.621977	GeneID:51321,Genbank:XM_005257432.4,HGNC:HGNC:28041,MIM:615169	archaelysin family metallopeptidase 2	GO:0006508,GO:0008233,GO:0008237,GO:0008270	proteolysis|peptidase activity|metallopeptidase activity|zinc ion binding
ANAPC1	1.9	1.99754	1.96712	1.91518	2.04432	2.0927	0.0179422	0.945175	GeneID:64682,Genbank:XM_017004710.2,HGNC:HGNC:19988,MIM:608473	anaphase promoting complex subunit 1	GO:0005654,GO:0005680,GO:0005829,GO:0031145,GO:0042787,GO:0043161,GO:0051301,GO:0051436,GO:0051437,GO:0051439,GO:0070979	nucleoplasm|anaphase-promoting complex|cytosol|anaphase-promoting complex-dependent catabolic process|protein ubiquitination involved in ubiquitin-dependent protein catabolic process|proteasome-mediated ubiquitin-dependent protein catabolic process|cell division|negative regulation of ubiquitin-protein ligase activity involved in mitotic cell cycle|positive regulation of ubiquitin-protein ligase …	hsa04110,hsa04114,hsa04120,hsa04914,hsa05166	Cell cycle|Oocyte meiosis|Ubiquitin mediated proteolysis|Progesterone-mediated oocyte maturation|Human T-cell leukemia virus 1 infection
ANAPC10	1.05189	0.864193	0.709446	1.09779	1.01876	0.906616	0.21074	0.507773	GeneID:10393,Genbank:XM_011531532.2,HGNC:HGNC:24077,MIM:613745	anaphase promoting complex subunit 10	GO:0005680,GO:0005737,GO:0007049,GO:0031145,GO:0051301,GO:0070979,GO:1904668	anaphase-promoting complex|cytoplasm|cell cycle|anaphase-promoting complex-dependent catabolic process|cell division|protein K11-linked ubiquitination|positive regulation of ubiquitin protein ligase activity	hsa04110,hsa04114,hsa04120,hsa04914,hsa05166	Cell cycle|Oocyte meiosis|Ubiquitin mediated proteolysis|Progesterone-mediated oocyte maturation|Human T-cell leukemia virus 1 infection
ANAPC11	5.05458	2.70241	3.05703	4.6465	4.51307	5.91114	0.497209	0.127418	GeneID:51529,Genbank:NM_001289414.1,HGNC:HGNC:14452,MIM:614534	anaphase promoting complex subunit 11	GO:0000278,GO:0005654,GO:0005680,GO:0005730,GO:0005829,GO:0016567,GO:0031145,GO:0034450,GO:0042787,GO:0043161,GO:0045842,GO:0046872,GO:0051301,GO:0051436,GO:0051437,GO:0051439,GO:0061630,GO:0070979,GO:0097602	mitotic cell cycle|nucleoplasm|anaphase-promoting complex|nucleolus|cytosol|protein ubiquitination|anaphase-promoting complex-dependent catabolic process|ubiquitin-ubiquitin ligase activity|protein ubiquitination involved in ubiquitin-dependent protein catabolic process|proteasome-mediated ubiquitin-dependent protein catabolic process|positive regulation of mitotic metaphase/anaphase transition|m…	hsa04110,hsa04114,hsa04120,hsa04914,hsa05166	Cell cycle|Oocyte meiosis|Ubiquitin mediated proteolysis|Progesterone-mediated oocyte maturation|Human T-cell leukemia virus 1 infection
ANAPC13	9.46043	8.33332	7.96165	10.198	6.44594	10.3914	0.00992114	0.973558	GeneID:25847,Genbank:NM_001242374.1,HGNC:HGNC:24540,MIM:614484	anaphase promoting complex subunit 13	GO:0005680,GO:0007049,GO:0051301,GO:0070979	anaphase-promoting complex|cell cycle|cell division|protein K11-linked ubiquitination	hsa04110,hsa04114,hsa04120,hsa04914	Cell cycle|Oocyte meiosis|Ubiquitin mediated proteolysis|Progesterone-mediated oocyte maturation
ANAPC15	1.06991	0.655655	0.86588	1.13441	0.710252	0.700308	-0.0251505	0.942654	GeneID:25906,Genbank:NM_001330321.1,HGNC:HGNC:24531,MIM:614717	anaphase promoting complex subunit 15	GO:0005680,GO:0007049,GO:0051301,GO:0090266	anaphase-promoting complex|cell cycle|cell division|regulation of mitotic cell cycle spindle assembly checkpoint
ANAPC16	17.3389	12.9242	12.0408	14.7225	12.037	13.5203	-0.0474895	0.85432	GeneID:119504,Genbank:NM_001242546.1,HGNC:HGNC:26976,MIM:613427	anaphase promoting complex subunit 16	GO:0000776,GO:0000777,GO:0005654,GO:0005680,GO:0005829,GO:0016567,GO:0031145,GO:0042787,GO:0043161,GO:0051301,GO:0051436,GO:0051437,GO:0051439	kinetochore|condensed chromosome kinetochore|nucleoplasm|anaphase-promoting complex|cytosol|protein ubiquitination|anaphase-promoting complex-dependent catabolic process|protein ubiquitination involved in ubiquitin-dependent protein catabolic process|proteasome-mediated ubiquitin-dependent protein catabolic process|cell division|negative regulation of ubiquitin-protein ligase activity involved in…
ANAPC2	6.86156	5.62625	5.50564	6.21513	4.91546	6.03282	-0.0596184	0.82386	GeneID:29882,Genbank:NM_013366.3,HGNC:HGNC:19989,MIM:606946	anaphase promoting complex subunit 2	GO:0005654,GO:0005680,GO:0005829,GO:0031145,GO:0031625,GO:0031915,GO:0042787,GO:0043161,GO:0045773,GO:0050775,GO:0051301,GO:0051436,GO:0051437,GO:0051439,GO:0070979,GO:0090129	nucleoplasm|anaphase-promoting complex|cytosol|anaphase-promoting complex-dependent catabolic process|ubiquitin protein ligase binding|positive regulation of synaptic plasticity|protein ubiquitination involved in ubiquitin-dependent protein catabolic process|proteasome-mediated ubiquitin-dependent protein catabolic process|positive regulation of axon extension|positive regulation of dendrite morp…	hsa04110,hsa04114,hsa04120,hsa04914,hsa05166	Cell cycle|Oocyte meiosis|Ubiquitin mediated proteolysis|Progesterone-mediated oocyte maturation|Human T-cell leukemia virus 1 infection
ANAPC4	5.37872	4.2924	4.41838	5.14692	4.53103	5.55528	-0.0212275	0.940229	GeneID:29945,Genbank:NM_001286756.1,HGNC:HGNC:19990,MIM:606947	anaphase promoting complex subunit 4	GO:0005680,GO:0007049,GO:0030071,GO:0031145,GO:0051301,GO:0070979	anaphase-promoting complex|cell cycle|regulation of mitotic metaphase/anaphase transition|anaphase-promoting complex-dependent catabolic process|cell division|protein K11-linked ubiquitination	hsa04110,hsa04114,hsa04120,hsa04914,hsa05166	Cell cycle|Oocyte meiosis|Ubiquitin mediated proteolysis|Progesterone-mediated oocyte maturation|Human T-cell leukemia virus 1 infection
ANAPC5	13.3104	11.2908	10.6157	12.7998	8.66308	10.3369	-0.175357	0.510406	GeneID:51433,Genbank:NM_001137559.1,HGNC:HGNC:15713,MIM:606948	anaphase promoting complex subunit 5	GO:0005634,GO:0005654,GO:0005680,GO:0005829,GO:0019903,GO:0031145,GO:0042787,GO:0043161,GO:0051301,GO:0051436,GO:0051437,GO:0051439,GO:0070979	nucleus|nucleoplasm|anaphase-promoting complex|cytosol|protein phosphatase binding|anaphase-promoting complex-dependent catabolic process|protein ubiquitination involved in ubiquitin-dependent protein catabolic process|proteasome-mediated ubiquitin-dependent protein catabolic process|cell division|negative regulation of ubiquitin-protein ligase activity involved in mitotic cell cycle|positive reg…	hsa04110,hsa04114,hsa04120,hsa04657,hsa04914,hsa05166	Cell cycle|Oocyte meiosis|Ubiquitin mediated proteolysis|IL-17 signaling pathway|Progesterone-mediated oocyte maturation|Human T-cell leukemia virus 1 infection
ANAPC7	3.50085	3.41554	3.02106	3.69628	2.98755	2.80026	-0.0853779	0.750202	GeneID:51434,Genbank:NM_016238.2,HGNC:HGNC:17380,MIM:606949	anaphase promoting complex subunit 7	GO:0005634,GO:0005654,GO:0005680,GO:0005829,GO:0019903,GO:0031145,GO:0042787,GO:0043161,GO:0051301,GO:0051436,GO:0051437,GO:0051439,GO:0070979	nucleus|nucleoplasm|anaphase-promoting complex|cytosol|protein phosphatase binding|anaphase-promoting complex-dependent catabolic process|protein ubiquitination involved in ubiquitin-dependent protein catabolic process|proteasome-mediated ubiquitin-dependent protein catabolic process|cell division|negative regulation of ubiquitin-protein ligase activity involved in mitotic cell cycle|positive reg…	hsa04110,hsa04114,hsa04120,hsa04914,hsa05166	Cell cycle|Oocyte meiosis|Ubiquitin mediated proteolysis|Progesterone-mediated oocyte maturation|Human T-cell leukemia virus 1 infection
ANG	3.18764	2.09945	2.12249	3.03392	2.3406	1.54356	-0.017861	0.968074	GeneID:283,Genbank:NM_001145.4,HGNC:HGNC:483,MIM:105850	angiogenin
ANGEL1	4.46389	4.22987	4.06842	4.35432	4.0778	2.79675	-0.224166	0.448705	GeneID:23357,Genbank:XM_017021115.2,HGNC:HGNC:19961	angel homolog 1	GO:0005634,GO:0005783,GO:0005801,GO:0005829,GO:0008190,GO:0019904,GO:0048471	nucleus|endoplasmic reticulum|cis-Golgi network|cytosol|eukaryotic initiation factor 4E binding|protein domain specific binding|perinuclear region of cytoplasm
ANGEL2	4.37944	4.10461	4.05801	4.39949	4.56157	8.32142	0.311376	0.333549	GeneID:90806,Genbank:NM_001300758.1,HGNC:HGNC:30534	angel homolog 2	GO:0003730,GO:0005737,GO:0015030,GO:0045930,GO:0070935	mRNA 3'-UTR binding|cytoplasm|Cajal body|negative regulation of mitotic cell cycle|3'-UTR-mediated mRNA stabilization
ANGPT1	10.9359	10.8747	7.62231	8.00073	3.68629	2.55837	-1.29367	0.000117612	GeneID:284,Genbank:NM_001199859.2,HGNC:HGNC:484,MIM:601667	angiopoietin 1	GO:0001525,GO:0005576,GO:0030154,GO:0030971,GO:0048014	angiogenesis|extracellular region|cell differentiation|receptor tyrosine kinase binding|Tie signaling pathway	hsa04010,hsa04014,hsa04015,hsa04066,hsa04151,hsa05323	MAPK signaling pathway|Ras signaling pathway|Rap1 signaling pathway|HIF-1 signaling pathway|PI3K-Akt signaling pathway|Rheumatoid arthritis
ANGPTL1	3.40661	1.90937	1.91877	2.31805	0.400741	0.361329	-1.78305	7.29933e-05	GeneID:9068,Genbank:NM_004673.3,HGNC:HGNC:489,MIM:603874	angiopoietin like 1	GO:0005102,GO:0005615,GO:0007169,GO:0070062	receptor binding|extracellular space|transmembrane receptor protein tyrosine kinase signaling pathway|extracellular exosome
ANGPTL2	1.59174	2.26541	3.02715	1.58761	1.45052	1.16914	-0.689576	0.0671934	GeneID:23452,Genbank:NM_012098.2,HGNC:HGNC:490,MIM:605001	angiopoietin like 2	GO:0005102,GO:0005615,GO:0007275,GO:0070062	receptor binding|extracellular space|multicellular organism development|extracellular exosome
ANGPTL4	2.57537	1.60084	0.837338	1.69423	0.096	0.352853	-1.82427	0.00527179	GeneID:51129,Genbank:NM_139314.2,HGNC:HGNC:16039,MIM:605910	angiopoietin like 4	GO:0001525,GO:0001666,GO:0004857,GO:0005576,GO:0005578,GO:0005615,GO:0019216,GO:0030154,GO:0042802,GO:0043066,GO:0045766,GO:0051005,GO:0051260,GO:0070328,GO:0072562,GO:2000352	angiogenesis|response to hypoxia|enzyme inhibitor activity|extracellular region|proteinaceous extracellular matrix|extracellular space|regulation of lipid metabolic process|cell differentiation|identical protein binding|negative regulation of apoptotic process|positive regulation of angiogenesis|negative regulation of lipoprotein lipase activity|protein homooligomerization|triglyceride homeostasi…	hsa03320,hsa04979	PPAR signaling pathway|Cholesterol metabolism
ANGPTL7	0.581705	1.03794	0.381664	0.230701	0.0189649	0.103749	-2.88505	0.0010433	GeneID:10218,Genbank:NM_021146.3,HGNC:HGNC:24078	angiopoietin like 7
ANK3	2.44476	2.43289	2.63988	2.29985	1.89427	4.07471	0.0262606	0.929214	GeneID:288,Genbank:NM_001204403.1,HGNC:HGNC:494,MIM:600465	ankyrin 3	GO:0000281,GO:0005200,GO:0005764,GO:0005886,GO:0007009,GO:0007165,GO:0007409,GO:0007411,GO:0007528,GO:0008092,GO:0009986,GO:0010628,GO:0010650,GO:0010765,GO:0010960,GO:0014704,GO:0014731,GO:0016020,GO:0016323,GO:0016328,GO:0016529,GO:0019228,GO:0030018,GO:0030315,GO:0030424,GO:0030425,GO:0030507,GO:0030674,GO:0031594,GO:0033268,GO:0033270,GO:0034112,GO:0042383,GO:0043001,GO:0043034,GO:0043194,GO:…	mitotic cytokinesis|structural constituent of cytoskeleton|lysosome|plasma membrane|plasma membrane organization|signal transduction|axonogenesis|axon guidance|neuromuscular junction development|cytoskeletal protein binding|cell surface|positive regulation of gene expression|positive regulation of cell communication by electrical coupling|positive regulation of sodium ion transport|magnesium ion …	hsa05205	Proteoglycans in cancer
ANKDD1B	0.71497	0.312035	0.504133	1.00114	2.1439	1.5653	1.67689	0.00169853	GeneID:728780,Genbank:XM_017009814.1,HGNC:HGNC:32525	ankyrin repeat and death domain containing 1B	GO:0007165	signal transduction
ANKEF1	1.38211	0.906312	0.900169	0.933873	1.11842	1.14197	-0.0323094	0.933226	GeneID:63926,Genbank:NM_022096.5,HGNC:HGNC:15803	ankyrin repeat and EF-hand domain containing 1	GO:0005509	calcium ion binding
ANKFY1	8.14795	9.74734	7.47594	7.54697	6.60658	8.07973	-0.173462	0.53021	GeneID:51479,Genbank:NM_001330063.1,HGNC:HGNC:20763,MIM:607927	ankyrin repeat and FYVE domain containing 1	GO:0005765,GO:0005768,GO:0005769,GO:0005829,GO:0006897,GO:0010008,GO:0016020,GO:0017137,GO:0032439,GO:0034058,GO:0042147,GO:0043231,GO:0044354,GO:0046872,GO:0048549,GO:0070062,GO:0090160,GO:1901981	lysosomal membrane|endosome|early endosome|cytosol|endocytosis|endosome membrane|membrane|Rab GTPase binding|endosome localization|endosomal vesicle fusion|retrograde transport, endosome to Golgi|intracellular membrane-bounded organelle|macropinosome|metal ion binding|positive regulation of pinocytosis|extracellular exosome|Golgi to lysosome transport|phosphatidylinositol phosphate binding
ANKH	2.95211	3.03964	3.29029	2.46907	3.39921	3.44126	0.00203876	0.993988	GeneID:56172,Genbank:NM_054027.5,HGNC:HGNC:15492,MIM:605145	ANKH inorganic pyrophosphate transport regulator	GO:0001501,GO:0005315,GO:0005886,GO:0005887,GO:0007626,GO:0015114,GO:0016021,GO:0019867,GO:0030500,GO:0030504,GO:0055085	skeletal system development|inorganic phosphate transmembrane transporter activity|plasma membrane|integral component of plasma membrane|locomotory behavior|phosphate ion transmembrane transporter activity|integral component of membrane|outer membrane|regulation of bone mineralization|inorganic diphosphate transmembrane transporter activity|transmembrane transport
ANKHD1	5.44316	5.904	6.84247	5.60137	11.7309	8.48499	0.0897948	0.828937	GeneID:54882,Genbank:NM_017747.2,HGNC:HGNC:24714,MIM:610500	ankyrin repeat and KH domain containing 1	GO:0003723,GO:0005737,GO:0045087	RNA binding|cytoplasm|innate immune response
ANKHD1-EIF4EBP3	5.18191	5.77092	5.29106	5.35197	8.57703	8.66993	0.149208	0.89099	GeneID:404734,Genbank:NM_020690.5,HGNC:HGNC:33530	ANKHD1-EIF4EBP3 readthrough	GO:0003723,GO:0005737,GO:0045087	RNA binding|cytoplasm|innate immune response
ANKIB1	6.03342	6.37771	5.83831	5.62428	7.82816	6.08949	0.0407846	0.877963	GeneID:54467,Genbank:XM_005250458.4,HGNC:HGNC:22215	ankyrin repeat and IBR domain containing 1	GO:0000151,GO:0000209,GO:0005737,GO:0031624,GO:0032436,GO:0042787,GO:0046872,GO:0061630	ubiquitin ligase complex|protein polyubiquitination|cytoplasm|ubiquitin conjugating enzyme binding|positive regulation of proteasomal ubiquitin-dependent protein catabolic process|protein ubiquitination involved in ubiquitin-dependent protein catabolic process|metal ion binding|ubiquitin protein ligase activity
ANKLE2	7.21853	6.08877	5.79714	6.04735	4.43991	3.97015	-0.44981	0.0992339	GeneID:23141,Genbank:NM_015114.2,HGNC:HGNC:29101,MIM:616062	ankyrin repeat and LEM domain containing 2	GO:0005789,GO:0007084,GO:0007417,GO:0016020,GO:0019888,GO:0030176,GO:0035307,GO:0042326,GO:0043066,GO:0050790,GO:0051301,GO:0051721	endoplasmic reticulum membrane|mitotic nuclear envelope reassembly|central nervous system development|membrane|protein phosphatase regulator activity|integral component of endoplasmic reticulum membrane|positive regulation of protein dephosphorylation|negative regulation of phosphorylation|negative regulation of apoptotic process|regulation of catalytic activity|cell division|protein phosphatase …
ANKMY1	1.13398	0.78017	0.792322	0.910906	1.05516	1.32487	0.351624	0.307113	GeneID:51281,Genbank:XM_024452954.1,HGNC:HGNC:20987	ankyrin repeat and MYND domain containing 1	GO:0046872	metal ion binding
ANKMY2	4.56037	3.66947	3.29077	4.35754	5.16105	5.14484	0.327582	0.287795	GeneID:57037,Genbank:NM_020319.2,HGNC:HGNC:25370	ankyrin repeat and MYND domain containing 2	GO:0005929,GO:0008589,GO:0019899,GO:0046872	cilium|regulation of smoothened signaling pathway|enzyme binding|metal ion binding
ANKRA2	2.74386	2.80556	2.51707	3.17497	3.51362	2.60217	0.0710394	0.820572	GeneID:57763,Genbank:NM_023039.4,HGNC:HGNC:13208,MIM:605787	ankyrin repeat family A member 2	GO:0003712,GO:0005634,GO:0005829,GO:0005856,GO:0006357,GO:0016020,GO:0019901,GO:0031625,GO:0042826,GO:0043234,GO:0043254,GO:0050750	transcription cofactor activity|nucleus|cytosol|cytoskeleton|regulation of transcription from RNA polymerase II promoter|membrane|protein kinase binding|ubiquitin protein ligase binding|histone deacetylase binding|protein complex|regulation of protein complex assembly|low-density lipoprotein particle receptor binding
ANKRD1	6.74341	6.89779	2.22058	1.6834	0.286144	0.692651	-2.92847	1.57823e-07	GeneID:27063,Genbank:NM_014391.2,HGNC:HGNC:15819,MIM:609599	ankyrin repeat domain 1	GO:0000122,GO:0001085,GO:0001105,GO:0001650,GO:0002039,GO:0003677,GO:0003714,GO:0005634,GO:0005654,GO:0005667,GO:0005737,GO:0005829,GO:0010976,GO:0019216,GO:0031432,GO:0031674,GO:0035690,GO:0035914,GO:0035994,GO:0042826,GO:0043065,GO:0043517,GO:0045214,GO:0045445,GO:0050714,GO:0055008,GO:0061629,GO:0070412,GO:0071222,GO:0071260,GO:0071347,GO:0071356,GO:0071407,GO:0071456,GO:0071560,GO:2000279	negative regulation of transcription from RNA polymerase II promoter|RNA polymerase II transcription factor binding|RNA polymerase II transcription coactivator activity|fibrillar center|p53 binding|DNA binding|transcription corepressor activity|nucleus|nucleoplasm|transcription factor complex|cytoplasm|cytosol|positive regulation of neuron projection development|regulation of lipid metabolic proc…
ANKRD10	7.06754	9.25345	10.9612	8.94179	10.5143	6.31814	-0.166982	0.601209	GeneID:55608,Genbank:NM_017664.3,HGNC:HGNC:20265	ankyrin repeat domain 10	GO:0060828	regulation of canonical Wnt signaling pathway
ANKRD11	4.05232	4.64753	3.98882	3.52043	3.33356	2.10011	-0.468547	0.130519	GeneID:29123,Genbank:XM_017023182.2,HGNC:HGNC:21316,MIM:611192	ankyrin repeat domain 11	GO:0001701,GO:0001894,GO:0005634,GO:0005654,GO:0005829,GO:0005886,GO:0035264,GO:0042475,GO:0048705,GO:0060325,GO:0060348	in utero embryonic development|tissue homeostasis|nucleus|nucleoplasm|cytosol|plasma membrane|multicellular organism growth|odontogenesis of dentin-containing tooth|skeletal system morphogenesis|face morphogenesis|bone development
ANKRD12	5.43133	6.47957	5.56473	4.61628	5.44529	4.65319	-0.290417	0.243298	GeneID:23253,Genbank:NM_015208.4,HGNC:HGNC:29135,MIM:610616	ankyrin repeat domain 12	GO:0005654,GO:0005829	nucleoplasm|cytosol
ANKRD13A	12.6185	10.8748	11.8734	10.9346	6.90603	10.8569	-0.330911	0.213191	GeneID:88455,Genbank:XM_005253984.1,HGNC:HGNC:21268,MIM:615123	ankyrin repeat domain 13A	GO:0005737,GO:0005770,GO:0005886	cytoplasm|late endosome|plasma membrane
ANKRD13C	3.19068	3.40532	2.99795	2.89751	5.58597	2.92363	0.151406	0.651876	GeneID:81573,Genbank:NM_030816.4,HGNC:HGNC:25374,MIM:615125	ankyrin repeat domain 13C	GO:0005102,GO:0005783,GO:0005789,GO:0006621,GO:0010869,GO:0048471,GO:2000209	receptor binding|endoplasmic reticulum|endoplasmic reticulum membrane|protein retention in ER lumen|regulation of receptor biosynthetic process|perinuclear region of cytoplasm|regulation of anoikis
ANKRD13D	3.6234	3.44507	4.02426	3.1362	2.53913	4.40043	-0.107839	0.71976	GeneID:338692,Genbank:NM_001347901.1,HGNC:HGNC:27880,MIM:615126	ankyrin repeat domain 13D	GO:0005737,GO:0005770,GO:0005886	cytoplasm|late endosome|plasma membrane
ANKRD16	0.996281	0.965189	1.04513	1.05199	1.0195	1.05149	0.24022	0.503471	GeneID:54522,Genbank:NM_019046.2,HGNC:HGNC:23471	ankyrin repeat domain 16
ANKRD17	6.78893	7.82837	6.91701	6.17241	8.25391	8.38415	0.0641891	0.801493	GeneID:26057,Genbank:NM_198889.2,HGNC:HGNC:23575,MIM:615929	ankyrin repeat domain 17	GO:0000785,GO:0001955,GO:0003682,GO:0003723,GO:0005634,GO:0005737,GO:0006275,GO:0016020,GO:0016032,GO:0031965,GO:0042742,GO:0043123,GO:0045087,GO:0045787,GO:0051151,GO:1900087,GO:1900245,GO:1900246	chromatin|blood vessel maturation|chromatin binding|RNA binding|nucleus|cytoplasm|regulation of DNA replication|membrane|viral process|nuclear membrane|defense response to bacterium|positive regulation of I-kappaB kinase/NF-kappaB signaling|innate immune response|positive regulation of cell cycle|negative regulation of smooth muscle cell differentiation|positive regulation of G1/S transition of m…
ANKRD22	1.4977	1.68763	0.589138	2.47887	4.64738	1.30534	1.06264	0.00187503	GeneID:118932,Genbank:NM_144590.2,HGNC:HGNC:28321	ankyrin repeat domain 22
ANKRD27	5.74521	5.01468	3.77524	4.47507	2.34478	3.57532	-0.534955	0.0912921	GeneID:84079,Genbank:NM_032139.2,HGNC:HGNC:25310	ankyrin repeat domain 27	GO:0000149,GO:0005085,GO:0005096,GO:0005764,GO:0005769,GO:0005770,GO:0005829,GO:0005886,GO:0015031,GO:0016020,GO:0017112,GO:0017137,GO:0030133,GO:0030659,GO:0035544,GO:0035646,GO:0042470,GO:0043005,GO:0045022,GO:0048812,GO:0050775,GO:0097422,GO:1990126	SNARE binding|guanyl-nucleotide exchange factor activity|GTPase activator activity|lysosome|early endosome|late endosome|cytosol|plasma membrane|protein transport|membrane|Rab guanyl-nucleotide exchange factor activity|Rab GTPase binding|transport vesicle|cytoplasmic vesicle membrane|negative regulation of SNARE complex assembly|endosome to melanosome transport|melanosome|neuron projection|early …
ANKRD28	6.17482	4.4504	4.21979	5.25777	3.01799	2.84839	-0.519405	0.0509159	GeneID:23243,Genbank:XM_024453418.1,HGNC:HGNC:29024,MIM:611122	ankyrin repeat domain 28	GO:0000139,GO:0005654,GO:0005829,GO:0048208	Golgi membrane|nucleoplasm|cytosol|COPII vesicle coating
ANKRD29	7.59596	6.91749	6.67958	5.04377	3.53241	5.35305	-0.602194	0.0324211	GeneID:147463,Genbank:XM_017025561.1,HGNC:HGNC:27110	ankyrin repeat domain 29
ANKRD33B	2.28473	1.18725	1.18146	1.6728	0.340291	0.204575	-1.67049	0.000426342	GeneID:651746,Genbank:NM_001164440.1,HGNC:HGNC:35240	ankyrin repeat domain 33B
ANKRD36	0.873918	1.20003	1.6089	1.05745	1.3091	1.09149	-0.0985457	0.749595	GeneID:375248,Genbank:NM_001354587.1,HGNC:HGNC:24079	ankyrin repeat domain 36
ANKRD36B	0.540934	0.97722	1.05193	0.728826	1.31623	0.796915	0.0237539	0.942675	GeneID:57730,Genbank:XM_006712661.2,HGNC:HGNC:29333	ankyrin repeat domain 36B
ANKRD36C	0.938931	1.0406	1.30987	5.01824	1.31736	0.786717	0.717012	0.173287	GeneID:400986,Genbank:NM_001310154.1,HGNC:HGNC:32946	ankyrin repeat domain 36C	GO:0008200	ion channel inhibitor activity
ANKRD37	4.3093	2.7484	3.0049	2.84457	3.73949	3.92493	0.275623	0.457345	GeneID:353322,Genbank:NM_181726.3,HGNC:HGNC:29593	ankyrin repeat domain 37	GO:0005634,GO:0005739,GO:0005829	nucleus|mitochondrion|cytosol
ANKRD39	2.36069	2.04386	2.94288	2.38612	3.49686	4.46058	0.547311	0.158209	GeneID:51239,Genbank:NM_016466.5,HGNC:HGNC:28640	ankyrin repeat domain 39
ANKRD40	13.2037	13.4717	10.5938	9.77892	10.1649	10.5059	-0.291357	0.261563	GeneID:91369,Genbank:NM_052855.3,HGNC:HGNC:28233	ankyrin repeat domain 40
ANKRD42	1.49789	1.45637	1.57294	1.26463	1.08794	1.64293	-0.179429	0.560679	GeneID:338699,Genbank:NM_001300972.1,HGNC:HGNC:26752	ankyrin repeat domain 42	GO:0005634,GO:0051059,GO:0051091,GO:0051092,GO:1900017	nucleus|NF-kappaB binding|positive regulation of DNA binding transcription factor activity|positive regulation of NF-kappaB transcription factor activity|positive regulation of cytokine production involved in inflammatory response
ANKRD44	4.97151	6.07811	5.31497	5.45611	4.8984	4.21785	-0.205561	0.444233	GeneID:91526,Genbank:XM_005246948.2,HGNC:HGNC:25259	ankyrin repeat domain 44
ANKRD46	3.74941	2.95818	2.42944	2.67464	1.45854	1.94239	-0.636909	0.0409243	GeneID:157567,Genbank:NM_001270379.1,HGNC:HGNC:27229	ankyrin repeat domain 46	GO:0016021	integral component of membrane
ANKRD49	3.73041	3.13266	3.27903	3.92089	3.30901	3.21731	-0.0610469	0.838812	GeneID:54851,Genbank:NM_017704.2,HGNC:HGNC:25970	ankyrin repeat domain 49	GO:0005634,GO:0007283,GO:0030154,GO:0045893	nucleus|spermatogenesis|cell differentiation|positive regulation of transcription, DNA-templated
ANKRD50	6.35672	7.94576	7.5622	6.50772	5.82704	5.83687	-0.309833	0.237811	GeneID:57182,Genbank:NM_020337.2,HGNC:HGNC:29223	ankyrin repeat domain 50	GO:0005768,GO:0015031,GO:1990126	endosome|protein transport|retrograde transport, endosome to plasma membrane
ANKRD52	3.92942	4.11552	3.93204	3.47297	3.32532	5.04271	-0.019407	0.943666	GeneID:283373,Genbank:NM_173595.3,HGNC:HGNC:26614	ankyrin repeat domain 52
ANKRD54	2.57717	1.40844	1.41609	1.86428	2.56107	2.07578	0.354101	0.330214	GeneID:129138,Genbank:XM_011529877.2,HGNC:HGNC:25185,MIM:613383	ankyrin repeat domain 54	GO:0005634,GO:0005737,GO:0006913,GO:0019887,GO:0030496,GO:0032403,GO:0045648,GO:1902531	nucleus|cytoplasm|nucleocytoplasmic transport|protein kinase regulator activity|midbody|protein complex binding|positive regulation of erythrocyte differentiation|regulation of intracellular signal transduction
ANKRD6	1.37251	1.49601	1.48626	1.00386	1.29669	1.82276	-0.12313	0.682091	GeneID:22881,Genbank:NM_001242809.1,HGNC:HGNC:17280,MIM:610583	ankyrin repeat domain 6	GO:0005634,GO:0005737,GO:0043231,GO:0046330,GO:0090090,GO:2000096	nucleus|cytoplasm|intracellular membrane-bounded organelle|positive regulation of JNK cascade|negative regulation of canonical Wnt signaling pathway|positive regulation of Wnt signaling pathway, planar cell polarity pathway
ANKRD65	2.76224	1.49528	2.5116	2.57665	3.20499	7.54041	0.892605	0.0165188	GeneID:441869,Genbank:XM_017001324.2,HGNC:HGNC:42950	ankyrin repeat domain 65
ANKRD9	3.25208	2.72908	2.49637	2.49614	3.93624	2.1443	0.0284662	0.931777	GeneID:122416,Genbank:NM_001348652.1,HGNC:HGNC:20096	ankyrin repeat domain 9	GO:0005829,GO:0043687	cytosol|post-translational protein modification
ANKS1A	8.06198	5.59423	3.57342	5.55244	4.45415	3.34933	-0.295511	0.242336	GeneID:23294,Genbank:NM_015245.2,HGNC:HGNC:20961,MIM:608994	ankyrin repeat and sterile alpha motif domain containing 1A	GO:0005654,GO:0005829,GO:0006929,GO:0016322,GO:0043005,GO:0046875,GO:0048013,GO:1901187	nucleoplasm|cytosol|substrate-dependent cell migration|neuron remodeling|neuron projection|ephrin receptor binding|ephrin receptor signaling pathway|regulation of ephrin receptor signaling pathway
ANKS3	1.48071	1.04792	0.98774	1.33709	2.40293	1.58579	0.539696	0.125502	GeneID:124401,Genbank:NM_001324129.1,HGNC:HGNC:29422,MIM:617310	ankyrin repeat and sterile alpha motif domain containing 3
ANKS4B	0	0.00689464	0	1.84497	1.89557	0	8.80874	0.0224176	GeneID:257629,Genbank:NM_145865.2,HGNC:HGNC:26795,MIM:609901	ankyrin repeat and sterile alpha motif domain containing 4B	GO:0005789,GO:0005886,GO:0005902,GO:0005903,GO:0030154,GO:0034976,GO:0043623,GO:1904106,GO:1904970	endoplasmic reticulum membrane|plasma membrane|microvillus|brush border|cell differentiation|response to endoplasmic reticulum stress|cellular protein complex assembly|protein localization to microvillus|brush border assembly
ANKS6	1.6268	1.40348	2.23219	1.77856	2.16884	5.71251	0.714454	0.0281876	GeneID:203286,Genbank:NM_173551.4,HGNC:HGNC:26724,MIM:615370	ankyrin repeat and sterile alpha motif domain containing 6	GO:0005737,GO:0005929	cytoplasm|cilium
ANKUB1	1.21649	0.0285203	0.158395	0.32478	0.131225	0.181846	0.202416	0.810295	GeneID:389161,Genbank:XM_011512798.1,HGNC:HGNC:29642	ankyrin repeat and ubiquitin domain containing 1
ANKZF1	3.86306	3.07905	3.60156	3.80181	3.98686	3.71926	0.180357	0.53788	GeneID:55139,Genbank:NM_018089.2,HGNC:HGNC:25527,MIM:617541	ankyrin repeat and zinc finger domain containing 1	GO:0003676,GO:0005737,GO:0016020,GO:0030433,GO:0036266,GO:0046872,GO:0070301,GO:0071630,GO:0072671	nucleic acid binding|cytoplasm|membrane|ubiquitin-dependent ERAD pathway|Cdc48p-Npl4p-Vms1p AAA ATPase complex|metal ion binding|cellular response to hydrogen peroxide|nuclear protein quality control by the ubiquitin-proteasome system|mitochondria-associated ubiquitin-dependent protein catabolic process
ANLN	0.198402	0.209931	0.357963	0.736848	3.8541	2.88243	3.1273	3.61682e-11	GeneID:54443,Genbank:NM_018685.4,HGNC:HGNC:14082,MIM:616027	anillin actin binding protein
ANO1	5.38673	2.35558	3.18267	4.24199	1.30167	1.07426	-0.940146	0.0108005	GeneID:55107,Genbank:NM_018043.5,HGNC:HGNC:21625,MIM:610108	anoctamin 1	GO:0005227,GO:0005229,GO:0005247,GO:0005254,GO:0005737,GO:0005886,GO:0006812,GO:0006821,GO:0007200,GO:0007275,GO:0015111,GO:0015705,GO:0016324,GO:0034220,GO:0034605,GO:0034707,GO:0035774,GO:0046983,GO:0050965,GO:0070062,GO:1902476	calcium activated cation channel activity|intracellular calcium activated chloride channel activity|voltage-gated chloride channel activity|chloride channel activity|cytoplasm|plasma membrane|cation transport|chloride transport|phospholipase C-activating G-protein coupled receptor signaling pathway|multicellular organism development|iodide transmembrane transporter activity|iodide transport|apica…
ANO10	2.49874	2.68421	2.32909	2.97569	2.64277	3.40024	0.15263	0.585027	GeneID:55129,Genbank:NM_001346469.1,HGNC:HGNC:25519,MIM:613726	anoctamin 10	GO:0005227,GO:0005229,GO:0005622,GO:0005886,GO:0006812,GO:0006821,GO:0016020,GO:0016021,GO:0034220	calcium activated cation channel activity|intracellular calcium activated chloride channel activity|intracellular|plasma membrane|cation transport|chloride transport|membrane|integral component of membrane|ion transmembrane transport
ANO5	1.5079	1.12203	1.01784	1.91352	1.02382	0.332038	-0.509095	0.248268	GeneID:203859,Genbank:XM_005252822.4,HGNC:HGNC:27337,MIM:608662	anoctamin 5	GO:0005229,GO:0005622,GO:0005789,GO:0005886,GO:0006821,GO:0016021,GO:0031982,GO:0034220,GO:0046983	intracellular calcium activated chloride channel activity|intracellular|endoplasmic reticulum membrane|plasma membrane|chloride transport|integral component of membrane|vesicle|ion transmembrane transport|protein dimerization activity
ANO6	20.8754	15.0831	17.4913	17.5574	5.24691	8.92601	-0.950957	0.00335668	GeneID:196527,Genbank:NM_001142679.1,HGNC:HGNC:25240,MIM:608663	anoctamin 6	GO:0002407,GO:0002543,GO:0005227,GO:0005229,GO:0005244,GO:0005247,GO:0005622,GO:0005829,GO:0005886,GO:0006812,GO:0006821,GO:0007596,GO:0009986,GO:0016020,GO:0017121,GO:0017128,GO:0030501,GO:0032060,GO:0034220,GO:0034707,GO:0034767,GO:0035579,GO:0035590,GO:0035630,GO:0035725,GO:0042803,GO:0043065,GO:0043312,GO:0045794,GO:0046931,GO:0060100,GO:0061589,GO:0061590,GO:0061591,GO:0070062,GO:0070588,GO:…	dendritic cell chemotaxis|activation of blood coagulation via clotting cascade|calcium activated cation channel activity|intracellular calcium activated chloride channel activity|voltage-gated ion channel activity|voltage-gated chloride channel activity|intracellular|cytosol|plasma membrane|cation transport|chloride transport|blood coagulation|cell surface|membrane|phospholipid scrambling|phospho…
ANO8	2.50195	2.43476	2.30015	3.10333	2.23096	3.67235	0.328493	0.26912	GeneID:57719,Genbank:XM_017027048.1,HGNC:HGNC:29329,MIM:610216	anoctamin 8	GO:0005229,GO:0005788,GO:0005886,GO:0006821,GO:0016021,GO:0034220,GO:0043687,GO:0044267	intracellular calcium activated chloride channel activity|endoplasmic reticulum lumen|plasma membrane|chloride transport|integral component of membrane|ion transmembrane transport|post-translational protein modification|cellular protein metabolic process
ANO9	1.26755	1.096	1.65946	1.38997	2.16354	1.74413	0.508937	0.119712	GeneID:338440,Genbank:NM_001012302.2,HGNC:HGNC:20679	anoctamin 9	GO:0005229,GO:0005622,GO:0005886,GO:0006821,GO:0016021,GO:0017128,GO:0034220,GO:0061589,GO:0061590,GO:0061591,GO:1902939	intracellular calcium activated chloride channel activity|intracellular|plasma membrane|chloride transport|integral component of membrane|phospholipid scramblase activity|ion transmembrane transport|calcium activated phosphatidylserine scrambling|calcium activated phosphatidylcholine scrambling|calcium activated galactosylceramide scrambling|negative regulation of intracellular calcium activated …
ANOS1	34.0776	22.7159	22.8482	18.9028	3.48012	4.43866	-2.01806	3.97178e-07	GeneID:3730,Genbank:NM_000216.3,HGNC:HGNC:6211,MIM:300836	anosmin 1	GO:0004867,GO:0005201,GO:0005576,GO:0005578,GO:0005615,GO:0005886,GO:0006928,GO:0006935,GO:0007155,GO:0007411,GO:0008201,GO:0008543	serine-type endopeptidase inhibitor activity|extracellular matrix structural constituent|extracellular region|proteinaceous extracellular matrix|extracellular space|plasma membrane|movement of cell or subcellular component|chemotaxis|cell adhesion|axon guidance|heparin binding|fibroblast growth factor receptor signaling pathway
ANP32A	21.9581	20.307	19.7413	23.1655	21.0732	18.3785	-0.00522603	0.983668	GeneID:8125,Genbank:NM_006305.3,HGNC:HGNC:13233,MIM:600832	acidic nuclear phosphoprotein 32 family member A	GO:0003723,GO:0005634,GO:0005654,GO:0005737,GO:0005783,GO:0006351,GO:0006355,GO:0006913,GO:0035556,GO:0042393,GO:0042981,GO:0043488,GO:0048471	RNA binding|nucleus|nucleoplasm|cytoplasm|endoplasmic reticulum|transcription, DNA-templated|regulation of transcription, DNA-templated|nucleocytoplasmic transport|intracellular signal transduction|histone binding|regulation of apoptotic process|regulation of mRNA stability|perinuclear region of cytoplasm
ANP32B	16.7781	14.9001	15.1849	15.9385	13.2238	18.8542	0.02913	0.911329	GeneID:10541,Genbank:NM_006401.2,HGNC:HGNC:16677	acidic nuclear phosphoprotein 32 family member B	GO:0001944,GO:0005634,GO:0005737,GO:0006334,GO:0006919,GO:0021591,GO:0042393,GO:0043486,GO:0045596,GO:0046827,GO:0048839,GO:0060021,GO:0070062,GO:0070063	vasculature development|nucleus|cytoplasm|nucleosome assembly|activation of cysteine-type endopeptidase activity involved in apoptotic process|ventricular system development|histone binding|histone exchange|negative regulation of cell differentiation|positive regulation of protein export from nucleus|inner ear development|palate development|extracellular exosome|RNA polymerase binding
ANP32E	9.3515	9.27732	7.9268	7.8909	23.3975	44.1119	1.18276	0.0163767	GeneID:81611,Genbank:NM_001136478.3,HGNC:HGNC:16673,MIM:609611	acidic nuclear phosphoprotein 32 family member E	GO:0000812,GO:0005634,GO:0006334,GO:0006913,GO:0016569,GO:0019212,GO:0031410,GO:0042393,GO:0042981,GO:0043486	Swr1 complex|nucleus|nucleosome assembly|nucleocytoplasmic transport|covalent chromatin modification|phosphatase inhibitor activity|cytoplasmic vesicle|histone binding|regulation of apoptotic process|histone exchange
ANPEP	12.6494	6.92861	3.55334	11.5685	38.7666	14.8807	1.56903	0.000551569	GeneID:290,Genbank:XM_011521473.1,HGNC:HGNC:500,MIM:151530	alanyl aminopeptidase, membrane	GO:0001525,GO:0001618,GO:0004177,GO:0004872,GO:0005615,GO:0005765,GO:0005793,GO:0005886,GO:0007165,GO:0007267,GO:0008217,GO:0008237,GO:0008270,GO:0009897,GO:0016021,GO:0030154,GO:0030667,GO:0042277,GO:0043171,GO:0043312,GO:0070006,GO:0070062	angiogenesis|virus receptor activity|aminopeptidase activity|receptor activity|extracellular space|lysosomal membrane|endoplasmic reticulum-Golgi intermediate compartment|plasma membrane|signal transduction|cell-cell signaling|regulation of blood pressure|metallopeptidase activity|zinc ion binding|external side of plasma membrane|integral component of membrane|cell differentiation|secretory granu…	hsa00480,hsa04614,hsa04640	Glutathione metabolism|Renin-angiotensin system|Hematopoietic cell lineage
ANTXR1	10.5826	9.25224	13.0423	9.61121	5.04554	3.82055	-0.951636	0.0111066	GeneID:84168,Genbank:NM_032208.2,HGNC:HGNC:21014,MIM:606410	anthrax toxin receptor 1	GO:0001568,GO:0004888,GO:0005518,GO:0005886,GO:0009897,GO:0009986,GO:0010008,GO:0016021,GO:0022414,GO:0031258,GO:0031527,GO:0031532,GO:0034446,GO:0046872,GO:0051015,GO:0070062,GO:1901202,GO:1905050	blood vessel development|transmembrane signaling receptor activity|collagen binding|plasma membrane|external side of plasma membrane|cell surface|endosome membrane|integral component of membrane|reproductive process|lamellipodium membrane|filopodium membrane|actin cytoskeleton reorganization|substrate adhesion-dependent cell spreading|metal ion binding|actin filament binding|extracellular exosome…	hsa04621	NOD-like receptor signaling pathway
ANTXR2	5.07493	5.23367	5.40531	5.3663	3.33074	2.73611	-0.590389	0.0618066	GeneID:118429,Genbank:NM_001286780.1,HGNC:HGNC:21732,MIM:608041	anthrax toxin receptor 2	GO:0004872,GO:0005576,GO:0005789,GO:0005886,GO:0009897,GO:0010008,GO:0016021,GO:0022414,GO:0046872,GO:1901998	receptor activity|extracellular region|endoplasmic reticulum membrane|plasma membrane|external side of plasma membrane|endosome membrane|integral component of membrane|reproductive process|metal ion binding|toxin transport	hsa04621	NOD-like receptor signaling pathway
ANXA1	113.835	72.7413	61.6765	101.493	52.9762	61.2941	-0.335131	0.198511	GeneID:301,Genbank:NM_000700.2,HGNC:HGNC:533,MIM:151690	annexin A1
ANXA10	0.0129051	0	0	1.41719	0.0377895	0	5.13092	0.00105003	GeneID:11199,Genbank:XM_011531571.2,HGNC:HGNC:534,MIM:608008	annexin A10	GO:0005509,GO:0005544,GO:0005739	calcium ion binding|calcium-dependent phospholipid binding|mitochondrion
ANXA11	12.7901	10.4109	10.274	12.5556	6.66586	8.70264	-0.260831	0.34311	GeneID:311,Genbank:XM_011539736.3,HGNC:HGNC:535,MIM:602572	annexin A11	GO:0003723,GO:0005509,GO:0005544,GO:0005635,GO:0005654,GO:0005737,GO:0005819,GO:0005829,GO:0006909,GO:0008429,GO:0016020,GO:0023026,GO:0030496,GO:0032506,GO:0042470,GO:0042581,GO:0042582,GO:0044548,GO:0045335,GO:0048306,GO:0051592,GO:0070062	RNA binding|calcium ion binding|calcium-dependent phospholipid binding|nuclear envelope|nucleoplasm|cytoplasm|spindle|cytosol|phagocytosis|phosphatidylethanolamine binding|membrane|MHC class II protein complex binding|midbody|cytokinetic process|melanosome|specific granule|azurophil granule|S100 protein binding|phagocytic vesicle|calcium-dependent protein binding|response to calcium ion|extracell…
ANXA2	60.7102	47.2622	39.5907	66.8942	33.9247	37.0107	-0.156946	0.557154	GeneID:302,Genbank:NM_004039.2,HGNC:HGNC:537,MIM:151740	annexin A2
ANXA2R	1.46345	1.89417	2.49173	2.43221	5.25858	3.94334	1.08565	0.0134153	GeneID:389289,Genbank:NM_001014279.2,HGNC:HGNC:33463,MIM:611296	annexin A2 receptor	GO:0004872	receptor activity
ANXA3	52.8796	32.4683	23.8412	36.7621	10.8639	7.47669	-1.2925	0.000145327	GeneID:306,Genbank:NM_005139.2,HGNC:HGNC:541,MIM:106490	annexin A3	GO:0005509,GO:0005544,GO:0005737,GO:0005829,GO:0005886,GO:0006909,GO:0010595,GO:0016020,GO:0019834,GO:0021766,GO:0030424,GO:0030425,GO:0030670,GO:0031100,GO:0042581,GO:0042742,GO:0043025,GO:0043312,GO:0045766,GO:0048306,GO:0051054,GO:0051091,GO:0051384,GO:0070062,GO:0070848	calcium ion binding|calcium-dependent phospholipid binding|cytoplasm|cytosol|plasma membrane|phagocytosis|positive regulation of endothelial cell migration|membrane|phospholipase A2 inhibitor activity|hippocampus development|axon|dendrite|phagocytic vesicle membrane|animal organ regeneration|specific granule|defense response to bacterium|neuronal cell body|neutrophil degranulation|positive regula…
ANXA4	9.1566	6.34643	6.00253	9.82978	3.82856	5.2535	-0.213916	0.470363	GeneID:307,Genbank:NM_001320698.1,HGNC:HGNC:542,MIM:106491	annexin A4	GO:0004859,GO:0005509,GO:0005544,GO:0005634,GO:0005737,GO:0005886,GO:0006357,GO:0007165,GO:0007219,GO:0009986,GO:0012506,GO:0030855,GO:0031965,GO:0032088,GO:0042802,GO:0043066,GO:0048306,GO:0048471,GO:0051059,GO:0070062,GO:2000483	phospholipase inhibitor activity|calcium ion binding|calcium-dependent phospholipid binding|nucleus|cytoplasm|plasma membrane|regulation of transcription from RNA polymerase II promoter|signal transduction|Notch signaling pathway|cell surface|vesicle membrane|epithelial cell differentiation|nuclear membrane|negative regulation of NF-kappaB transcription factor activity|identical protein binding|n…
ANXA5	43.9814	43.2865	37.4785	50.2646	45.4643	28.0562	-0.0568427	0.83897	GeneID:308,Genbank:NM_001154.3,HGNC:HGNC:543,MIM:131230	annexin A5	GO:0002576,GO:0004859,GO:0005509,GO:0005543,GO:0005544,GO:0005576,GO:0005622,GO:0005737,GO:0005829,GO:0005925,GO:0007165,GO:0007596,GO:0009897,GO:0010033,GO:0016020,GO:0043066,GO:0050819,GO:0070062,GO:0072563	platelet degranulation|phospholipase inhibitor activity|calcium ion binding|phospholipid binding|calcium-dependent phospholipid binding|extracellular region|intracellular|cytoplasm|cytosol|focal adhesion|signal transduction|blood coagulation|external side of plasma membrane|response to organic substance|membrane|negative regulation of apoptotic process|negative regulation of coagulation|extracell…
ANXA6	17.2185	17.5424	16.0699	15.0363	13.3615	9.03398	-0.425903	0.157262	GeneID:309,Genbank:NM_001155.4,HGNC:HGNC:544,MIM:114070	annexin A6	GO:0005509,GO:0005525,GO:0005544,GO:0005739,GO:0005765,GO:0005925,GO:0006816,GO:0006937,GO:0008289,GO:0015276,GO:0015485,GO:0016020,GO:0031902,GO:0034220,GO:0042470,GO:0042803,GO:0048306,GO:0048471,GO:0051260,GO:0051560,GO:0070062,GO:0097190	calcium ion binding|GTP binding|calcium-dependent phospholipid binding|mitochondrion|lysosomal membrane|focal adhesion|calcium ion transport|regulation of muscle contraction|lipid binding|ligand-gated ion channel activity|cholesterol binding|membrane|late endosome membrane|ion transmembrane transport|melanosome|protein homodimerization activity|calcium-dependent protein binding|perinuclear region…
ANXA7	12.1992	9.30886	8.84224	11.0952	8.54179	9.3621	-0.0799441	0.753636	GeneID:310,Genbank:NM_001320879.1,HGNC:HGNC:545,MIM:186360	annexin A7	GO:0003723,GO:0005178,GO:0005509,GO:0005544,GO:0005634,GO:0005635,GO:0005789,GO:0005829,GO:0005886,GO:0006874,GO:0006914,GO:0007599,GO:0008283,GO:0008360,GO:0009651,GO:0009992,GO:0010629,GO:0014070,GO:0016020,GO:0030855,GO:0035176,GO:0048306,GO:0051592,GO:0061025,GO:0070062	RNA binding|integrin binding|calcium ion binding|calcium-dependent phospholipid binding|nucleus|nuclear envelope|endoplasmic reticulum membrane|cytosol|plasma membrane|cellular calcium ion homeostasis|autophagy|hemostasis|cell proliferation|regulation of cell shape|response to salt stress|cellular water homeostasis|negative regulation of gene expression|response to organic cyclic compound|membran…
ANXA8L1	4.71048	3.11171	2.07645	2.53898	0.15483	0.240693	-2.95373	1.82003e-06	GeneID:728113,Genbank:NM_001278924.1,HGNC:HGNC:23334	annexin A8 like 1	GO:0005509,GO:0005544,GO:0070062	calcium ion binding|calcium-dependent phospholipid binding|extracellular exosome
AOAH	1.06549	1.53389	1.04489	1.06577	0.336778	0.443521	-1.13479	0.016356	GeneID:313,Genbank:XM_017012102.2,HGNC:HGNC:548,MIM:102593	acyloxyacyl hydrolase	GO:0003824,GO:0004465,GO:0005576,GO:0006629,GO:0006954,GO:0031410,GO:0050528	catalytic activity|lipoprotein lipase activity|extracellular region|lipid metabolic process|inflammatory response|cytoplasmic vesicle|acyloxyacyl hydrolase activity
AOC1	0.169831	0.0705666	0.209355	1.85184	0.172431	0.211785	1.74394	0.022172	GeneID:26,Genbank:XM_017011945.1,HGNC:HGNC:80,MIM:104610	amine oxidase, copper containing 1			hsa00330,hsa00340,hsa00380	Arginine and proline metabolism|Histidine metabolism|Tryptophan metabolism
AOC3	40.4293	30.8786	31.3709	30.4579	8.66712	9.22714	-1.33231	0.000482719	GeneID:8639,Genbank:XM_011525419.2,HGNC:HGNC:550,MIM:603735	amine oxidase, copper containing 3			hsa00260,hsa00350,hsa00360,hsa00410	Glycine, serine and threonine metabolism|Tyrosine metabolism|Phenylalanine metabolism|beta-Alanine metabolism
AOX1	1.38558	1.92256	2.59234	1.42857	0.671046	0.597185	-1.23395	0.00879121	GeneID:316,Genbank:XM_011511062.1,HGNC:HGNC:553,MIM:602841	aldehyde oxidase 1	GO:0004031,GO:0005506,GO:0005829,GO:0009055,GO:0009115,GO:0016614,GO:0016903,GO:0017144,GO:0042802,GO:0042803,GO:0042816,GO:0043546,GO:0050660,GO:0051287,GO:0051537,GO:0055114,GO:0070062,GO:0102797,GO:0102798	aldehyde oxidase activity|iron ion binding|cytosol|electron transfer activity|xanthine catabolic process|oxidoreductase activity, acting on CH-OH group of donors|oxidoreductase activity, acting on the aldehyde or oxo group of donors|drug metabolic process|identical protein binding|protein homodimerization activity|vitamin B6 metabolic process|molybdopterin cofactor binding|flavin adenine dinucleo…	hsa00280,hsa00350,hsa00380,hsa00750,hsa00760,hsa00830,hsa00982,hsa04630	Valine, leucine and isoleucine degradation|Tyrosine metabolism|Tryptophan metabolism|Vitamin B6 metabolism|Nicotinate and nicotinamide metabolism|Retinol metabolism|Drug metabolism - cytochrome P450|Jak-STAT signaling pathway
AP1AR	1.7932	1.9631	1.55999	1.44892	1.7101	1.64666	-0.198979	0.500286	GeneID:55435,Genbank:NM_018569.5,HGNC:HGNC:28808,MIM:610851	adaptor related protein complex 1 associated regulatory protein	GO:0001920,GO:0005768,GO:0005769,GO:0005770,GO:0005794,GO:0005829,GO:0015031,GO:0019894,GO:0030133,GO:0034315,GO:0034613,GO:0035650,GO:0048203,GO:1900025,GO:2000146	negative regulation of receptor recycling|endosome|early endosome|late endosome|Golgi apparatus|cytosol|protein transport|kinesin binding|transport vesicle|regulation of Arp2/3 complex-mediated actin nucleation|cellular protein localization|AP-1 adaptor complex binding|vesicle targeting, trans-Golgi to endosome|negative regulation of substrate adhesion-dependent cell spreading|negative regulation…
AP1B1	10.5096	11.3734	9.4737	11.7048	9.52549	11.4065	0.105172	0.695881	GeneID:162,Genbank:NM_001166019.1,HGNC:HGNC:554,MIM:600157	adaptor related protein complex 1 beta 1 subunit	GO:0000139,GO:0005215,GO:0005765,GO:0005794,GO:0005829,GO:0006886,GO:0007368,GO:0007507,GO:0016192,GO:0019886,GO:0019901,GO:0030131,GO:0030276,GO:0030659,GO:0030665,GO:0032588,GO:0043231,GO:0050690	Golgi membrane|transporter activity|lysosomal membrane|Golgi apparatus|cytosol|intracellular protein transport|determination of left/right symmetry|heart development|vesicle-mediated transport|antigen processing and presentation of exogenous peptide antigen via MHC class II|protein kinase binding|clathrin adaptor complex|clathrin binding|cytoplasmic vesicle membrane|clathrin-coated vesicle membra…	hsa04142,hsa05170	Lysosome|Human immunodeficiency virus 1 infection
AP1G1	14.4254	13.0506	11.7397	12.2534	14.4214	9.65932	-0.159141	0.548425	GeneID:164,Genbank:NM_001128.5,HGNC:HGNC:555,MIM:603533	adaptor related protein complex 1 gamma 1 subunit	GO:0000139,GO:0005215,GO:0005737,GO:0005765,GO:0005794,GO:0005829,GO:0006886,GO:0008565,GO:0016020,GO:0017137,GO:0019886,GO:0019894,GO:0030119,GO:0030131,GO:0030136,GO:0030659,GO:0030665,GO:0030742,GO:0032438,GO:0032588,GO:0035646,GO:0043231,GO:0043323,GO:0045954,GO:0050690,GO:0055037,GO:0090160	Golgi membrane|transporter activity|cytoplasm|lysosomal membrane|Golgi apparatus|cytosol|intracellular protein transport|protein transporter activity|membrane|Rab GTPase binding|antigen processing and presentation of exogenous peptide antigen via MHC class II|kinesin binding|AP-type membrane coat adaptor complex|clathrin adaptor complex|clathrin-coated vesicle|cytoplasmic vesicle membrane|clathri…	hsa04142,hsa05170	Lysosome|Human immunodeficiency virus 1 infection
AP1G2	2.82546	2.09604	2.35086	3.18734	3.28737	3.10345	0.464023	0.0754674	GeneID:8906,Genbank:NM_001282474.1,HGNC:HGNC:556,MIM:603534	adaptor related protein complex 1 gamma 2 subunit	GO:0000139,GO:0005794,GO:0005798,GO:0006886,GO:0008565,GO:0010008,GO:0016020,GO:0016032,GO:0016192,GO:0030121,GO:0030133	Golgi membrane|Golgi apparatus|Golgi-associated vesicle|intracellular protein transport|protein transporter activity|endosome membrane|membrane|viral process|vesicle-mediated transport|AP-1 adaptor complex|transport vesicle	hsa04142,hsa05170	Lysosome|Human immunodeficiency virus 1 infection
AP1M1	10.7282	7.08758	7.04093	9.27358	5.24672	5.79546	-0.261869	0.341108	GeneID:8907,Genbank:NM_001130524.1,HGNC:HGNC:13667,MIM:603535	adaptor related protein complex 1 mu 1 subunit	GO:0000139,GO:0005765,GO:0005829,GO:0005886,GO:0006886,GO:0016020,GO:0019886,GO:0030131,GO:0030659,GO:0030665,GO:0032438,GO:0032588,GO:0035579,GO:0035646,GO:0043312,GO:0050690,GO:0070062	Golgi membrane|lysosomal membrane|cytosol|plasma membrane|intracellular protein transport|membrane|antigen processing and presentation of exogenous peptide antigen via MHC class II|clathrin adaptor complex|cytoplasmic vesicle membrane|clathrin-coated vesicle membrane|melanosome organization|trans-Golgi network membrane|specific granule membrane|endosome to melanosome transport|neutrophil degranul…	hsa04142,hsa05170	Lysosome|Human immunodeficiency virus 1 infection
AP1M2	5.10156	3.66676	3.59845	6.16055	7.6222	10.0514	1.00148	0.00409767	GeneID:10053,Genbank:NM_005498.4,HGNC:HGNC:558,MIM:607309	adaptor related protein complex 1 mu 2 subunit	GO:0000139,GO:0005765,GO:0005829,GO:0006605,GO:0006903,GO:0019886,GO:0030131,GO:0030659,GO:0030665,GO:0032588,GO:0043231,GO:0050690	Golgi membrane|lysosomal membrane|cytosol|protein targeting|vesicle targeting|antigen processing and presentation of exogenous peptide antigen via MHC class II|clathrin adaptor complex|cytoplasmic vesicle membrane|clathrin-coated vesicle membrane|trans-Golgi network membrane|intracellular membrane-bounded organelle|regulation of defense response to virus by virus	hsa04142,hsa05170	Lysosome|Human immunodeficiency virus 1 infection
AP1S1	5.94722	4.75679	4.57538	9.76491	11.0985	12.3733	1.21773	5.71268e-05	GeneID:1174,Genbank:NM_001283.4,HGNC:HGNC:559,MIM:603531	adaptor related protein complex 1 sigma 1 subunit	GO:0000139,GO:0005765,GO:0005794,GO:0005829,GO:0005905,GO:0006886,GO:0006898,GO:0008565,GO:0009615,GO:0016020,GO:0019886,GO:0030121,GO:0030659,GO:0032588,GO:0042147,GO:0043195,GO:0043231,GO:0050690,GO:0070062	Golgi membrane|lysosomal membrane|Golgi apparatus|cytosol|clathrin-coated pit|intracellular protein transport|receptor-mediated endocytosis|protein transporter activity|response to virus|membrane|antigen processing and presentation of exogenous peptide antigen via MHC class II|AP-1 adaptor complex|cytoplasmic vesicle membrane|trans-Golgi network membrane|retrograde transport, endosome to Golgi|te…	hsa04142,hsa05170	Lysosome|Human immunodeficiency virus 1 infection
AP1S2	4.52254	5.80662	5.97833	4.94078	2.22367	3.95891	-0.701215	0.0484195	GeneID:8905,Genbank:NM_003916.4,HGNC:HGNC:560,MIM:300629	adaptor related protein complex 1 sigma 2 subunit	GO:0005794,GO:0005905,GO:0006886,GO:0008542,GO:0008565,GO:0016192,GO:0030117,GO:0030659,GO:0036465,GO:0043231,GO:0045444,GO:0050885,GO:0060612,GO:0098793	Golgi apparatus|clathrin-coated pit|intracellular protein transport|visual learning|protein transporter activity|vesicle-mediated transport|membrane coat|cytoplasmic vesicle membrane|synaptic vesicle recycling|intracellular membrane-bounded organelle|fat cell differentiation|neuromuscular process controlling balance|adipose tissue development|presynapse	hsa04142,hsa05170	Lysosome|Human immunodeficiency virus 1 infection
AP1S3	3.41989	1.91978	2.27573	1.8999	2.25117	2.73765	-0.151478	0.687586	GeneID:130340,Genbank:NM_001039569.1,HGNC:HGNC:18971,MIM:615781	adaptor related protein complex 1 sigma 3 subunit	GO:0005794,GO:0005905,GO:0006605,GO:0008565,GO:0016192,GO:0030117,GO:0030659,GO:0043231	Golgi apparatus|clathrin-coated pit|protein targeting|protein transporter activity|vesicle-mediated transport|membrane coat|cytoplasmic vesicle membrane|intracellular membrane-bounded organelle	hsa04142,hsa05170	Lysosome|Human immunodeficiency virus 1 infection
AP2A1	8.27553	7.18421	7.04189	8.32849	5.53398	8.48571	0.0128303	0.962737	GeneID:160,Genbank:NM_014203.2,HGNC:HGNC:561,MIM:601026	adaptor related protein complex 2 alpha 1 subunit	GO:0005829,GO:0005886,GO:0006886,GO:0006895,GO:0006897,GO:0007018,GO:0008022,GO:0008565,GO:0010976,GO:0016020,GO:0016323,GO:0016324,GO:0019886,GO:0019901,GO:0030122,GO:0030130,GO:0030666,GO:0030669,GO:0032403,GO:0032433,GO:0032802,GO:0034383,GO:0036020,GO:0045334,GO:0048013,GO:0048260,GO:0050690,GO:0050750,GO:0060071,GO:0061024,GO:0072583,GO:1900126	cytosol|plasma membrane|intracellular protein transport|Golgi to endosome transport|endocytosis|microtubule-based movement|protein C-terminus binding|protein transporter activity|positive regulation of neuron projection development|membrane|basolateral plasma membrane|apical plasma membrane|antigen processing and presentation of exogenous peptide antigen via MHC class II|protein kinase binding|AP…	hsa04144,hsa04721,hsa04961,hsa05016	Endocytosis|Synaptic vesicle cycle|Endocrine and other factor-regulated calcium reabsorption|Huntington disease
AP2A2	10.4746	10.3029	9.32599	10.0644	19.0507	11.7192	0.468235	0.122933	GeneID:161,Genbank:NM_001242837.1,HGNC:HGNC:562,MIM:607242	adaptor related protein complex 2 alpha 2 subunit	GO:0005829,GO:0005886,GO:0006886,GO:0007018,GO:0008289,GO:0008565,GO:0019886,GO:0019901,GO:0030122,GO:0030666,GO:0030667,GO:0030669,GO:0031410,GO:0032802,GO:0034383,GO:0036020,GO:0043312,GO:0045334,GO:0048013,GO:0050690,GO:0060071,GO:0061024,GO:0072583,GO:0097718,GO:0101003	cytosol|plasma membrane|intracellular protein transport|microtubule-based movement|lipid binding|protein transporter activity|antigen processing and presentation of exogenous peptide antigen via MHC class II|protein kinase binding|AP-2 adaptor complex|endocytic vesicle membrane|secretory granule membrane|clathrin-coated endocytic vesicle membrane|cytoplasmic vesicle|low-density lipoprotein partic…	hsa04144,hsa04721,hsa04961,hsa05016	Endocytosis|Synaptic vesicle cycle|Endocrine and other factor-regulated calcium reabsorption|Huntington disease
AP2B1	18.7779	19.4361	18.91	17.246	28.1102	23.7366	0.235102	0.392087	GeneID:163,Genbank:NM_001030006.1,HGNC:HGNC:563,MIM:601025	adaptor related protein complex 2 beta 1 subunit	GO:0005794,GO:0006886,GO:0016192,GO:0030131,GO:0030276,GO:0030665	Golgi apparatus|intracellular protein transport|vesicle-mediated transport|clathrin adaptor complex|clathrin binding|clathrin-coated vesicle membrane	hsa04144,hsa04721,hsa04961,hsa05016	Endocytosis|Synaptic vesicle cycle|Endocrine and other factor-regulated calcium reabsorption|Huntington disease
AP2M1	34.8371	30.2817	27.519	34.2158	25.4115	24.0977	-0.0978222	0.708415	GeneID:1173,Genbank:NM_001311198.1,HGNC:HGNC:564,MIM:601024	adaptor related protein complex 2 mu 1 subunit	GO:0005886,GO:0005905,GO:0006886,GO:0006897,GO:0008289,GO:0030131	plasma membrane|clathrin-coated pit|intracellular protein transport|endocytosis|lipid binding|clathrin adaptor complex	hsa04144,hsa04721,hsa04961,hsa05016	Endocytosis|Synaptic vesicle cycle|Endocrine and other factor-regulated calcium reabsorption|Huntington disease
AP2S1	6.85465	5.78848	4.86984	7.89123	4.79546	7.91	0.240622	0.42137	GeneID:1175,Genbank:NM_021575.3,HGNC:HGNC:565,MIM:602242	adaptor related protein complex 2 sigma 1 subunit	GO:0005886,GO:0006886,GO:0006897,GO:0008565,GO:0030122	plasma membrane|intracellular protein transport|endocytosis|protein transporter activity|AP-2 adaptor complex	hsa04144,hsa04721,hsa04961,hsa05016	Endocytosis|Synaptic vesicle cycle|Endocrine and other factor-regulated calcium reabsorption|Huntington disease
AP3B1	4.50523	4.9272	4.49363	4.66501	6.0852	4.81659	0.117558	0.652094	GeneID:8546,Genbank:NM_003664.4,HGNC:HGNC:566,MIM:603401	adaptor related protein complex 3 beta 1 subunit			hsa04142	Lysosome
AP3D1	11.0027	10.9514	9.51014	11.6766	9.96749	15.0587	0.284307	0.293042	GeneID:8943,Genbank:NM_003938.7,HGNC:HGNC:568,MIM:607246	adaptor related protein complex 3 delta 1 subunit	GO:0000139,GO:0005215,GO:0005765,GO:0005794,GO:0005886,GO:0006726,GO:0006886,GO:0008089,GO:0010008,GO:0016020,GO:0016182,GO:0030123,GO:0032438,GO:0035646,GO:0043195,GO:0048007,GO:0048490,GO:0048499,GO:0051138,GO:0061088,GO:0072657,GO:0098830,GO:0098943,GO:1904115	Golgi membrane|transporter activity|lysosomal membrane|Golgi apparatus|plasma membrane|eye pigment biosynthetic process|intracellular protein transport|anterograde axonal transport|endosome membrane|membrane|synaptic vesicle budding from endosome|AP-3 adaptor complex|melanosome organization|endosome to melanosome transport|terminal bouton|antigen processing and presentation, exogenous lipid antig…	hsa04142	Lysosome
AP3M1	5.77059	5.45793	5.28513	5.75953	4.83306	7.20142	0.0756443	0.786793	GeneID:26985,Genbank:XM_024447939.1,HGNC:HGNC:569,MIM:610366	adaptor related protein complex 3 mu 1 subunit	GO:0005764,GO:0005765,GO:0005794,GO:0006622,GO:0008089,GO:0017137,GO:0030131,GO:0030659,GO:0048490,GO:1904115	lysosome|lysosomal membrane|Golgi apparatus|protein targeting to lysosome|anterograde axonal transport|Rab GTPase binding|clathrin adaptor complex|cytoplasmic vesicle membrane|anterograde synaptic vesicle transport|axon cytoplasm	hsa04142	Lysosome
AP3M2	2.54006	3.20082	2.58828	2.32297	2.39239	3.2129	-0.116424	0.700542	GeneID:10947,Genbank:NM_001134296.1,HGNC:HGNC:570,MIM:610469	adaptor related protein complex 3 mu 2 subunit	GO:0005794,GO:0006886,GO:0008089,GO:0030119,GO:0030131,GO:0030659,GO:0048490,GO:1904115	Golgi apparatus|intracellular protein transport|anterograde axonal transport|AP-type membrane coat adaptor complex|clathrin adaptor complex|cytoplasmic vesicle membrane|anterograde synaptic vesicle transport|axon cytoplasm	hsa04142	Lysosome
AP3S1	2.76376	2.44328	2.17011	3.1096	2.8605	2.82505	0.226988	0.410469	GeneID:1176,Genbank:NM_001002924.2,HGNC:HGNC:2013,MIM:601507	adaptor related protein complex 3 sigma 1 subunit	GO:0005215,GO:0005794,GO:0006886,GO:0008089,GO:0008286,GO:0008565,GO:0030119,GO:0030123,GO:0030133,GO:0030659,GO:0043231,GO:0048490,GO:1904115	transporter activity|Golgi apparatus|intracellular protein transport|anterograde axonal transport|insulin receptor signaling pathway|protein transporter activity|AP-type membrane coat adaptor complex|AP-3 adaptor complex|transport vesicle|cytoplasmic vesicle membrane|intracellular membrane-bounded organelle|anterograde synaptic vesicle transport|axon cytoplasm	hsa04142	Lysosome
AP3S2	3.42692	2.58701	2.5398	3.18305	2.50151	4.10732	0.411679	0.564151	GeneID:10239,Genbank:NM_005829.4,HGNC:HGNC:571,MIM:602416	adaptor related protein complex 3 sigma 2 subunit	GO:0005794,GO:0006886,GO:0008089,GO:0008565,GO:0030123,GO:0030659,GO:0043231,GO:0048490,GO:1904115	Golgi apparatus|intracellular protein transport|anterograde axonal transport|protein transporter activity|AP-3 adaptor complex|cytoplasmic vesicle membrane|intracellular membrane-bounded organelle|anterograde synaptic vesicle transport|axon cytoplasm	hsa04142	Lysosome
AP4B1	1.84877	1.96209	1.91053	2.04559	2.97018	1.58967	0.0452926	0.887921	GeneID:10717,Genbank:NM_001253853.2,HGNC:HGNC:572,MIM:607245	adaptor related protein complex 4 beta 1 subunit	GO:0005802,GO:0005829,GO:0006605,GO:0008104,GO:0016192,GO:0019898,GO:0030124,GO:0030131,GO:0030276,GO:0031904,GO:0032588	trans-Golgi network|cytosol|protein targeting|protein localization|vesicle-mediated transport|extrinsic component of membrane|AP-4 adaptor complex|clathrin adaptor complex|clathrin binding|endosome lumen|trans-Golgi network membrane	hsa04142	Lysosome
AP4E1	2.14771	2.11271	1.939	2.37866	1.52837	1.66988	-0.256624	0.372339	GeneID:23431,Genbank:XM_005254264.4,HGNC:HGNC:573,MIM:607244	adaptor related protein complex 4 epsilon 1 subunit	GO:0006605,GO:0008104,GO:0016192,GO:0030124,GO:0031904,GO:0032588	protein targeting|protein localization|vesicle-mediated transport|AP-4 adaptor complex|endosome lumen|trans-Golgi network membrane	hsa04142	Lysosome
AP4M1	3.51968	2.62802	2.83691	2.95073	4.03623	4.41455	0.513578	0.106097	GeneID:9179,Genbank:XM_005250689.4,HGNC:HGNC:574,MIM:602296	adaptor related protein complex 4 mu 1 subunit	GO:0005769,GO:0005802,GO:0005829,GO:0006605,GO:0006622,GO:0006886,GO:0006895,GO:0008104,GO:0019904,GO:0030124,GO:0030131,GO:0031904,GO:0032588,GO:0070062,GO:0090160,GO:1903361	early endosome|trans-Golgi network|cytosol|protein targeting|protein targeting to lysosome|intracellular protein transport|Golgi to endosome transport|protein localization|protein domain specific binding|AP-4 adaptor complex|clathrin adaptor complex|endosome lumen|trans-Golgi network membrane|extracellular exosome|Golgi to lysosome transport|protein localization to basolateral plasma membrane	hsa04142	Lysosome
AP4S1	0.817209	0.820172	0.768031	0.757889	1.06205	0.72294	0.0324191	0.920512	GeneID:11154,Genbank:NM_001254729.1,HGNC:HGNC:575,MIM:607243	adaptor related protein complex 4 sigma 1 subunit	GO:0006605,GO:0008104,GO:0008565,GO:0016192,GO:0030124,GO:0031904,GO:0032588,GO:0043231	protein targeting|protein localization|protein transporter activity|vesicle-mediated transport|AP-4 adaptor complex|endosome lumen|trans-Golgi network membrane|intracellular membrane-bounded organelle	hsa04142	Lysosome
AP5B1	6.38834	8.49446	5.06564	5.9717	5.50638	6.18631	-0.135002	0.647183	GeneID:91056,Genbank:NM_138368.4,HGNC:HGNC:25104,MIM:614367	adaptor related protein complex 5 beta 1 subunit	GO:0005765,GO:0015031,GO:0016197,GO:0030119	lysosomal membrane|protein transport|endosomal transport|AP-type membrane coat adaptor complex
AP5M1	3.23684	3.77666	3.32999	2.84577	3.08284	2.88943	-0.312436	0.227147	GeneID:55745,Genbank:NM_018229.3,HGNC:HGNC:20192,MIM:614368	adaptor related protein complex 5 mu 1 subunit	GO:0005764,GO:0005765,GO:0005770,GO:0005829,GO:0015031,GO:0016020,GO:0016197,GO:0030119,GO:0031902	lysosome|lysosomal membrane|late endosome|cytosol|protein transport|membrane|endosomal transport|AP-type membrane coat adaptor complex|late endosome membrane
AP5S1	2.78413	2.46459	2.31387	2.73665	1.95433	2.2777	-0.0478753	0.885958	GeneID:55317,Genbank:NM_001204446.1,HGNC:HGNC:15875,MIM:614824	adaptor related protein complex 5 sigma 1 subunit	GO:0000724,GO:0005654,GO:0005764,GO:0005765,GO:0005770,GO:0005829,GO:0015031,GO:0016197,GO:0030119,GO:0031902	double-strand break repair via homologous recombination|nucleoplasm|lysosome|lysosomal membrane|late endosome|cytosol|protein transport|endosomal transport|AP-type membrane coat adaptor complex|late endosome membrane
AP5Z1	3.22371	3.25474	2.80484	3.53701	4.01059	4.06671	0.31678	0.240189	GeneID:9907,Genbank:XM_017012864.1,HGNC:HGNC:22197,MIM:613653	adaptor related protein complex 5 zeta 1 subunit	GO:0000724,GO:0005634,GO:0005654,GO:0005737,GO:0015031,GO:0016197,GO:0016607,GO:0030119,GO:0044599	double-strand break repair via homologous recombination|nucleus|nucleoplasm|cytoplasm|protein transport|endosomal transport|nuclear speck|AP-type membrane coat adaptor complex|AP-5 adaptor complex
APAF1	3.72371	4.45044	4.06022	3.37912	2.9585	6.51217	-0.0233904	0.944757	GeneID:317,Genbank:XM_017019250.1,HGNC:HGNC:576,MIM:602233	apoptotic peptidase activating factor 1			hsa01524,hsa04115,hsa04210,hsa04215,hsa05010,hsa05012,hsa05014,hsa05016,hsa05134,hsa05152,hsa05161,hsa05169,hsa05200,hsa05222	Platinum drug resistance|p53 signaling pathway|Apoptosis|Apoptosis - multiple species|Alzheimer disease|Parkinson disease|Amyotrophic lateral sclerosis (ALS)|Huntington disease|Legionellosis|Tuberculosis|Hepatitis B|Epstein-Barr virus infection|Pathways in cancer|Small cell lung cancer
APBA1	0.718442	0.699387	0.813289	0.760137	0.75999	1.47754	0.486707	0.132445	GeneID:320,Genbank:XM_011518617.2,HGNC:HGNC:578,MIM:602414	amyloid beta precursor protein binding family A member 1	GO:0001540,GO:0001701,GO:0005634,GO:0005794,GO:0005829,GO:0006461,GO:0006886,GO:0007155,GO:0007268,GO:0007269,GO:0007399,GO:0007626,GO:0008021,GO:0008088,GO:0010468,GO:0014047,GO:0014051,GO:0016020,GO:0035264,GO:0043005,GO:0048471	amyloid-beta binding|in utero embryonic development|nucleus|Golgi apparatus|cytosol|protein complex assembly|intracellular protein transport|cell adhesion|chemical synaptic transmission|neurotransmitter secretion|nervous system development|locomotory behavior|synaptic vesicle|axo-dendritic transport|regulation of gene expression|glutamate secretion|gamma-aminobutyric acid secretion|membrane|multi…
APBA3	3.02327	2.61252	1.96067	2.49596	2.98544	3.20345	0.293508	0.341681	GeneID:9546,Genbank:NM_004886.3,HGNC:HGNC:580,MIM:604262	amyloid beta precursor protein binding family A member 3	GO:0001540,GO:0001701,GO:0004857,GO:0007268,GO:0010468,GO:0015031,GO:0019899,GO:0043086,GO:0048471	amyloid-beta binding|in utero embryonic development|enzyme inhibitor activity|chemical synaptic transmission|regulation of gene expression|protein transport|enzyme binding|negative regulation of catalytic activity|perinuclear region of cytoplasm
APBB1	4.69673	3.09124	3.01113	3.50725	2.34498	2.00117	-0.388636	0.184887	GeneID:322,Genbank:NM_145689.2,HGNC:HGNC:581,MIM:602709	amyloid beta precursor protein binding family B member 1	GO:0000122,GO:0001540,GO:0003682,GO:0005634,GO:0005654,GO:0005737,GO:0005886,GO:0006302,GO:0006351,GO:0006355,GO:0006915,GO:0006974,GO:0007050,GO:0007165,GO:0007409,GO:0008134,GO:0010039,GO:0010976,GO:0016607,GO:0030027,GO:0030308,GO:0030426,GO:0032403,GO:0042393,GO:0042734,GO:0043025,GO:0043065,GO:0043197,GO:0043234,GO:0043967,GO:0044304,GO:0045202,GO:0045211,GO:0045739,GO:0045893,GO:0045944,GO:…	negative regulation of transcription from RNA polymerase II promoter|amyloid-beta binding|chromatin binding|nucleus|nucleoplasm|cytoplasm|plasma membrane|double-strand break repair|transcription, DNA-templated|regulation of transcription, DNA-templated|apoptotic process|cellular response to DNA damage stimulus|cell cycle arrest|signal transduction|axonogenesis|transcription factor binding|respons…	hsa05010	Alzheimer disease
APBB1IP	5.71582	6.11765	5.13124	6.58154	2.49199	3.31316	-0.587349	0.128102	GeneID:54518,Genbank:XM_011519514.2,HGNC:HGNC:17379,MIM:609036	amyloid beta precursor protein binding family B member 1 interacting protein	GO:0002291,GO:0005829,GO:0005856,GO:0005886,GO:0005925,GO:0007165,GO:0030027,GO:0042101,GO:0045785	T cell activation via T cell receptor contact with antigen bound to MHC molecule on antigen presenting cell|cytosol|cytoskeleton|plasma membrane|focal adhesion|signal transduction|lamellipodium|T cell receptor complex|positive regulation of cell adhesion	hsa04015,hsa04611	Rap1 signaling pathway|Platelet activation
APBB2	5.75706	5.54623	5.05328	4.07633	3.28795	2.6038	-0.719313	0.00719921	GeneID:323,Genbank:NM_001330658.1,HGNC:HGNC:582,MIM:602710	amyloid beta precursor protein binding family B member 2	GO:0001540,GO:0001764,GO:0005634,GO:0005737,GO:0006355,GO:0007050,GO:0007411,GO:0008134,GO:0016020,GO:0030027,GO:0030198,GO:0030308,GO:0030426,GO:0035556,GO:0043065,GO:0043066,GO:0045202	amyloid-beta binding|neuron migration|nucleus|cytoplasm|regulation of transcription, DNA-templated|cell cycle arrest|axon guidance|transcription factor binding|membrane|lamellipodium|extracellular matrix organization|negative regulation of cell growth|growth cone|intracellular signal transduction|positive regulation of apoptotic process|negative regulation of apoptotic process|synapse
APBB3	1.80951	2.39844	2.83557	2.69442	2.977	1.49861	-0.124153	0.764434	GeneID:10307,Genbank:NM_133174.2,HGNC:HGNC:20708,MIM:602711	amyloid beta precursor protein binding family B member 3	GO:0001540,GO:0005634,GO:0005737,GO:0005829,GO:0006355,GO:0008134,GO:0015629	amyloid-beta binding|nucleus|cytoplasm|cytosol|regulation of transcription, DNA-templated|transcription factor binding|actin cytoskeleton
APC	3.98705	4.57027	4.18905	3.46992	5.07164	4.16495	-0.0444705	0.865614	GeneID:324,Genbank:NM_001354895.1,HGNC:HGNC:583,MIM:611731	APC, WNT signaling pathway regulator			hsa04310,hsa04390,hsa04550,hsa04810,hsa04934,hsa05165,hsa05166,hsa05200,hsa05206,hsa05210,hsa05213,hsa05217,hsa05224,hsa05225,hsa05226	Wnt signaling pathway|Hippo signaling pathway|Signaling pathways regulating pluripotency of stem cells|Regulation of actin cytoskeleton|Cushing syndrome|Human papillomavirus infection|Human T-cell leukemia virus 1 infection|Pathways in cancer|MicroRNAs in cancer|Colorectal cancer|Endometrial cancer|Basal cell carcinoma|Breast cancer|Hepatocellular carcinoma|Gastric cancer
APCDD1	1.81675	1.0353	1.20306	1.56624	1.51141	1.87919	0.368982	0.241728	GeneID:147495,Genbank:NM_153000.4,HGNC:HGNC:15718,MIM:607479	APC down-regulated 1	GO:0001942,GO:0005887,GO:0016055,GO:0017147,GO:0030178,GO:0042802,GO:0043615	hair follicle development|integral component of plasma membrane|Wnt signaling pathway|Wnt-protein binding|negative regulation of Wnt signaling pathway|identical protein binding|astrocyte cell migration
APEH	7.69658	6.25572	6.55692	8.55698	8.5901	11.3565	0.457105	0.0830719	GeneID:327,Genbank:XM_011533661.2,HGNC:HGNC:586,MIM:102645	acylaminoacyl-peptide hydrolase	GO:0003723,GO:0004252,GO:0005576,GO:0005829,GO:0006415,GO:0006508,GO:0008242,GO:0031965,GO:0042802,GO:0043312,GO:0050435,GO:0070062,GO:1904813	RNA binding|serine-type endopeptidase activity|extracellular region|cytosol|translational termination|proteolysis|omega peptidase activity|nuclear membrane|identical protein binding|neutrophil degranulation|amyloid-beta metabolic process|extracellular exosome|ficolin-1-rich granule lumen
APEX1	15.0255	13.2555	15.1234	17.6828	23.8196	27.4494	0.716627	0.00926168	GeneID:328,Genbank:NM_001641.3,HGNC:HGNC:587,MIM:107748	apurinic/apyrimidinic endodeoxyribonuclease 1			hsa03410	Base excision repair
APEX2	3.84776	3.77824	3.60315	4.00207	6.16881	4.21045	0.399403	0.215271	GeneID:27301,Genbank:NM_014481.3,HGNC:HGNC:17889,MIM:300773	apurinic/apyrimidinic endodeoxyribonuclease 2			hsa03410	Base excision repair
APH1A	19.7536	17.214	15.2227	18.9007	23.2713	37.0956	0.562123	0.0842591	GeneID:51107,Genbank:NM_001243771.1,HGNC:HGNC:29509,MIM:607629	aph-1 homolog A, gamma-secretase subunit	GO:0001656,GO:0004175,GO:0005783,GO:0005789,GO:0005794,GO:0005886,GO:0005887,GO:0006509,GO:0007219,GO:0007220,GO:0016020,GO:0016021,GO:0016485,GO:0031293,GO:0032580,GO:0034205,GO:0035333,GO:0042982,GO:0042987,GO:0043065,GO:0043085,GO:0048013,GO:0070765	metanephros development|endopeptidase activity|endoplasmic reticulum|endoplasmic reticulum membrane|Golgi apparatus|plasma membrane|integral component of plasma membrane|membrane protein ectodomain proteolysis|Notch signaling pathway|Notch receptor processing|membrane|integral component of membrane|protein processing|membrane protein intracellular domain proteolysis|Golgi cisterna membrane|amyloi…	hsa04330,hsa05010	Notch signaling pathway|Alzheimer disease
APH1B	4.13143	3.50619	3.36137	5.28014	1.48604	2.80348	-0.397934	0.298976	GeneID:83464,Genbank:NM_031301.3,HGNC:HGNC:24080,MIM:607630	aph-1 homolog B, gamma-secretase subunit	GO:0004175,GO:0005783,GO:0005886,GO:0005887,GO:0007219,GO:0007220,GO:0008233,GO:0016021,GO:0016485,GO:0030133,GO:0031293,GO:0035333,GO:0043065,GO:0043085,GO:0048013,GO:0070765	endopeptidase activity|endoplasmic reticulum|plasma membrane|integral component of plasma membrane|Notch signaling pathway|Notch receptor processing|peptidase activity|integral component of membrane|protein processing|transport vesicle|membrane protein intracellular domain proteolysis|Notch receptor processing, ligand-dependent|positive regulation of apoptotic process|positive regulation of catal…	hsa04330,hsa05010	Notch signaling pathway|Alzheimer disease
API5	8.02267	7.99461	6.67575	7.02564	9.55674	8.2854	0.0733621	0.792066	GeneID:8539,Genbank:NM_001142930.1,HGNC:HGNC:594,MIM:609774	apoptosis inhibitor 5	GO:0005634,GO:0005737,GO:0006915,GO:0017134,GO:0043066	nucleus|cytoplasm|apoptotic process|fibroblast growth factor binding|negative regulation of apoptotic process
APIP	8.11116	5.12213	5.26428	7.31292	4.65542	6.26974	0.0454866	0.874887	GeneID:51074,Genbank:NM_015957.3,HGNC:HGNC:17581,MIM:612491	APAF1 interacting protein	GO:0005737,GO:0006915,GO:0008270,GO:0019509,GO:0042802,GO:0043066,GO:0046570,GO:0051289,GO:0070269,GO:0070372	cytoplasm|apoptotic process|zinc ion binding|L-methionine salvage from methylthioadenosine|identical protein binding|negative regulation of apoptotic process|methylthioribulose 1-phosphate dehydratase activity|protein homotetramerization|pyroptosis|regulation of ERK1 and ERK2 cascade	hsa00270	Cysteine and methionine metabolism
APLF	1.52764	1.05337	1.21017	1.20787	0.947082	0.7116	-0.580734	0.0769261	GeneID:200558,Genbank:NM_173545.2,HGNC:HGNC:28724,MIM:611035	aprataxin and PNKP like factor	GO:0000012,GO:0000166,GO:0003906,GO:0004520,GO:0005634,GO:0005654,GO:0005829,GO:0006302,GO:0006974,GO:0008408,GO:0035861,GO:0045191,GO:0046872,GO:0051106,GO:0140078,GO:0140080	single strand break repair|nucleotide binding|DNA-(apurinic or apyrimidinic site) lyase activity|endodeoxyribonuclease activity|nucleus|nucleoplasm|cytosol|double-strand break repair|cellular response to DNA damage stimulus|3'-5' exonuclease activity|site of double-strand break|regulation of isotype switching|metal ion binding|positive regulation of DNA ligation|class I DNA-(apurinic or apyrimidi…
APLN	1.64837	1.19786	1.04938	1.31593	0.320033	0.511673	-1.09133	0.0190347	GeneID:8862,Genbank:NM_017413.4,HGNC:HGNC:16665,MIM:300297	apelin	GO:0001664,GO:0002026,GO:0005102,GO:0005179,GO:0005576,GO:0005615,GO:0006955,GO:0007165,GO:0007186,GO:0007595,GO:0008284,GO:0023052,GO:0031652,GO:0031704,GO:0042327,GO:0042756,GO:0043576,GO:0045776,GO:0045823,GO:0045906,GO:0048471,GO:0051461,GO:0051466,GO:0060183,GO:0060976,GO:1904022	G-protein coupled receptor binding|regulation of the force of heart contraction|receptor binding|hormone activity|extracellular region|extracellular space|immune response|signal transduction|G-protein coupled receptor signaling pathway|lactation|positive regulation of cell proliferation|signaling|positive regulation of heat generation|apelin receptor binding|positive regulation of phosphorylation…	hsa04080,hsa04371	Neuroactive ligand-receptor interaction|Apelin signaling pathway
APLNR	3.73669	3.94068	5.86485	2.93436	1.18593	3.06836	-1.02219	0.00640572	GeneID:187,Genbank:NM_005161.4,HGNC:HGNC:339,MIM:600052	apelin receptor			hsa04080,hsa04371	Neuroactive ligand-receptor interaction|Apelin signaling pathway
APLP2	136.565	129.342	106.102	119.344	178.036	202.378	0.42835	0.160403	GeneID:334,Genbank:NM_001642.2,HGNC:HGNC:598,MIM:104776	amyloid beta precursor like protein 2	GO:0002576,GO:0003677,GO:0004867,GO:0005634,GO:0005788,GO:0005886,GO:0007186,GO:0008201,GO:0016020,GO:0016021,GO:0031092,GO:0042802,GO:0043687,GO:0044267,GO:0046914,GO:0070062	platelet degranulation|DNA binding|serine-type endopeptidase inhibitor activity|nucleus|endoplasmic reticulum lumen|plasma membrane|G-protein coupled receptor signaling pathway|heparin binding|membrane|integral component of membrane|platelet alpha granule membrane|identical protein binding|post-translational protein modification|cellular protein metabolic process|transition metal ion binding|extr…
APMAP	18.2994	17.7877	15.8914	17.6001	12.6791	9.98652	-0.405391	0.167318	GeneID:57136,Genbank:XM_005260763.3,HGNC:HGNC:13238,MIM:615884	adipocyte plasma membrane associated protein	GO:0004064,GO:0005783,GO:0009058,GO:0009986,GO:0016020,GO:0016021,GO:0016844,GO:0070062	arylesterase activity|endoplasmic reticulum|biosynthetic process|cell surface|membrane|integral component of membrane|strictosidine synthase activity|extracellular exosome
APOBEC2	0.0347516	0.0625759	0.0943443	0.0128954	0.0420691	3.13321	1.01276	0.360538	GeneID:10930,Genbank:NM_006789.3,HGNC:HGNC:605,MIM:604797	apolipoprotein B mRNA editing enzyme catalytic subunit 2	GO:0003723,GO:0004126,GO:0006397,GO:0008270,GO:0016554,GO:0016556,GO:0042802,GO:0080111	RNA binding|cytidine deaminase activity|mRNA processing|zinc ion binding|cytidine to uridine editing|mRNA modification|identical protein binding|DNA demethylation
APOBEC3A	1.0635	6.05229	0.684353	0.559183	0.309974	0.0297301	-3.24722	1.14132e-05	GeneID:200315,Genbank:NM_145699.3,HGNC:HGNC:17343,MIM:607109	apolipoprotein B mRNA editing enzyme catalytic subunit 3A	GO:0004126,GO:0005634,GO:0005737,GO:0008270,GO:0010529,GO:0044356,GO:0045071,GO:0045087,GO:0047844,GO:0051607,GO:0070383,GO:0071466,GO:0080111	cytidine deaminase activity|nucleus|cytoplasm|zinc ion binding|negative regulation of transposition|clearance of foreign intracellular DNA by conversion of DNA cytidine to uridine|negative regulation of viral genome replication|innate immune response|deoxycytidine deaminase activity|defense response to virus|DNA cytosine deamination|cellular response to xenobiotic stimulus|DNA demethylation	hsa05170	Human immunodeficiency virus 1 infection
APOBEC3B	0.622218	0.57967	0.301116	0.848126	2.44664	0.785168	1.38648	0.0171077	GeneID:9582,Genbank:NM_004900.4,HGNC:HGNC:17352,MIM:607110	apolipoprotein B mRNA editing enzyme catalytic subunit 3B	GO:0003723,GO:0005634,GO:0008270,GO:0010529,GO:0045087,GO:0047844,GO:0051607	RNA binding|nucleus|zinc ion binding|negative regulation of transposition|innate immune response|deoxycytidine deaminase activity|defense response to virus	hsa05170	Human immunodeficiency virus 1 infection
APOBEC3C	6.01883	7.34195	7.94458	7.38727	7.34536	9.10036	0.208912	0.471211	GeneID:27350,Genbank:XM_024452218.1,HGNC:HGNC:17353,MIM:607750	apolipoprotein B mRNA editing enzyme catalytic subunit 3C	GO:0003723,GO:0005634,GO:0005737,GO:0008270,GO:0009972,GO:0010529,GO:0016032,GO:0016814,GO:0045071,GO:0045087,GO:0051607,GO:0080111	RNA binding|nucleus|cytoplasm|zinc ion binding|cytidine deamination|negative regulation of transposition|viral process|hydrolase activity, acting on carbon-nitrogen (but not peptide) bonds, in cyclic amidines|negative regulation of viral genome replication|innate immune response|defense response to virus|DNA demethylation	hsa05170	Human immunodeficiency virus 1 infection
APOBEC3D	1.01807	1.8109	1.44564	1.36458	1.77713	0.778126	-0.0959484	0.823473	GeneID:140564,Genbank:NM_152426.3,HGNC:HGNC:17354,MIM:609900	apolipoprotein B mRNA editing enzyme catalytic subunit 3D	GO:0000932,GO:0005737,GO:0008270,GO:0010529,GO:0016814,GO:0045087,GO:0045869,GO:0051607,GO:0070383	P-body|cytoplasm|zinc ion binding|negative regulation of transposition|hydrolase activity, acting on carbon-nitrogen (but not peptide) bonds, in cyclic amidines|innate immune response|negative regulation of single stranded viral RNA replication via double stranded DNA intermediate|defense response to virus|DNA cytosine deamination	hsa05170	Human immunodeficiency virus 1 infection
APOBEC3F	0.861129	1.18643	0.886009	0.932237	1.19524	0.860275	0.032703	0.917025	GeneID:200316,Genbank:XM_024452178.1,HGNC:HGNC:17356,MIM:608993	apolipoprotein B mRNA editing enzyme catalytic subunit 3F			hsa05170	Human immunodeficiency virus 1 infection
APOBEC3G	1.89086	3.09033	1.9907	1.86541	1.23881	0.893706	-0.75279	0.0635622	GeneID:60489,Genbank:XM_017028903.1,HGNC:HGNC:17357,MIM:607113	apolipoprotein B mRNA editing enzyme catalytic subunit 3G			hsa05170	Human immunodeficiency virus 1 infection
APOBR	3.66335	4.67026	3.08336	3.34062	1.34664	1.91723	-0.857303	0.0319275	GeneID:55911,Genbank:NM_018690.3,HGNC:HGNC:24087,MIM:605220	apolipoprotein B receptor	GO:0005886,GO:0006641,GO:0006869,GO:0006898,GO:0008203,GO:0016020,GO:0030229,GO:0034361,GO:0034362,GO:0034447,GO:0042627	plasma membrane|triglyceride metabolic process|lipid transport|receptor-mediated endocytosis|cholesterol metabolic process|membrane|very-low-density lipoprotein particle receptor activity|very-low-density lipoprotein particle|low-density lipoprotein particle|very-low-density lipoprotein particle clearance|chylomicron
APOC1	68.1242	95.8345	53.899	96.8253	39.2636	32.0271	-0.473606	0.244154	GeneID:341,Genbank:NM_001321066.1,HGNC:HGNC:607,MIM:107710	apolipoprotein C1			hsa04979	Cholesterol metabolism
APOC2	2.43346	4.05766	5.5972	3.78068	2.83442	5.05456	0.0141357	0.974959	GeneID:344,Genbank:NM_000483.4,HGNC:HGNC:609,MIM:608083	apolipoprotein C2	GO:0001523,GO:0005576,GO:0005615,GO:0005769,GO:0008289,GO:0010518,GO:0010898,GO:0010902,GO:0010916,GO:0016004,GO:0016042,GO:0032375,GO:0033344,GO:0033700,GO:0034361,GO:0034362,GO:0034363,GO:0034366,GO:0034370,GO:0034371,GO:0034372,GO:0034375,GO:0034378,GO:0034382,GO:0034384,GO:0042493,GO:0042627,GO:0042632,GO:0042803,GO:0042953,GO:0043274,GO:0043691,GO:0045723,GO:0045833,GO:0048261,GO:0051006,GO:…	retinoid metabolic process|extracellular region|extracellular space|early endosome|lipid binding|positive regulation of phospholipase activity|positive regulation of triglyceride catabolic process|positive regulation of very-low-density lipoprotein particle remodeling|negative regulation of very-low-density lipoprotein particle clearance|phospholipase activator activity|lipid catabolic process|ne…	hsa04979	Cholesterol metabolism
APOD	6.84029	8.28804	6.79234	17.876	9.3438	2.50792	0.100789	0.852104	GeneID:347,Genbank:NM_001647.3,HGNC:HGNC:612,MIM:107740	apolipoprotein D	GO:0000302,GO:0001525,GO:0005319,GO:0005576,GO:0005615,GO:0005783,GO:0006006,GO:0006629,GO:0007420,GO:0007568,GO:0010642,GO:0014012,GO:0015485,GO:0022626,GO:0030425,GO:0042246,GO:0042308,GO:0042493,GO:0043025,GO:0048471,GO:0048662,GO:0048678,GO:0051895,GO:0060588,GO:0070062,GO:0071638,GO:1900016,GO:2000098,GO:2000405	response to reactive oxygen species|angiogenesis|lipid transporter activity|extracellular region|extracellular space|endoplasmic reticulum|glucose metabolic process|lipid metabolic process|brain development|aging|negative regulation of platelet-derived growth factor receptor signaling pathway|peripheral nervous system axon regeneration|cholesterol binding|cytosolic ribosome|dendrite|tissue regene…
APOE	38.5957	188.663	91.8948	123.08	71.9327	53.9259	-0.191723	0.723675	GeneID:348,Genbank:NM_001302688.1,HGNC:HGNC:613,MIM:107741	apolipoprotein E			hsa04979,hsa05010	Cholesterol metabolism|Alzheimer disease
APOH	0.550569	1.24499	1.51126	3.0656	4.88314	4.69023	2.05259	3.22313e-07	GeneID:350,Genbank:NM_000042.2,HGNC:HGNC:616,MIM:138700	apolipoprotein H			hsa04979	Cholesterol metabolism
APOL1	12.5241	19.9896	10.0103	9.9162	11.5024	7.28873	-0.536604	0.048621	GeneID:8542,Genbank:NM_145343.2,HGNC:HGNC:618,MIM:603743	apolipoprotein L1	GO:0005254,GO:0005576,GO:0005615,GO:0005788,GO:0006869,GO:0006898,GO:0008203,GO:0008289,GO:0019835,GO:0031224,GO:0031640,GO:0034361,GO:0034364,GO:0042157,GO:0043687,GO:0044267,GO:0045087,GO:0072562,GO:1902476	chloride channel activity|extracellular region|extracellular space|endoplasmic reticulum lumen|lipid transport|receptor-mediated endocytosis|cholesterol metabolic process|lipid binding|cytolysis|intrinsic component of membrane|killing of cells of other organism|very-low-density lipoprotein particle|high-density lipoprotein particle|lipoprotein metabolic process|post-translational protein modifica…	hsa05143	African trypanosomiasis
APOL2	4.70111	7.19995	3.93921	4.59792	4.51766	2.8978	-0.388142	0.191759	GeneID:23780,Genbank:NM_145637.2,HGNC:HGNC:619,MIM:607252	apolipoprotein L2	GO:0005102,GO:0005576,GO:0005789,GO:0006629,GO:0006869,GO:0006953,GO:0007275,GO:0008035,GO:0008203,GO:0008289,GO:0016020,GO:0042157,GO:0060135	receptor binding|extracellular region|endoplasmic reticulum membrane|lipid metabolic process|lipid transport|acute-phase response|multicellular organism development|high-density lipoprotein particle binding|cholesterol metabolic process|lipid binding|membrane|lipoprotein metabolic process|maternal process involved in female pregnancy
APOL3	5.21679	7.57831	4.5184	5.18515	2.23744	0.945332	-1.41843	0.00184023	GeneID:80833,Genbank:NM_145642.2,HGNC:HGNC:14868,MIM:607253	apolipoprotein L3	GO:0004871,GO:0005319,GO:0005576,GO:0005737,GO:0006954,GO:0008289,GO:0016020,GO:0042157,GO:0043123	signal transducer activity|lipid transporter activity|extracellular region|cytoplasm|inflammatory response|lipid binding|membrane|lipoprotein metabolic process|positive regulation of I-kappaB kinase/NF-kappaB signaling
APOL4	3.09785	3.18143	2.97357	3.42859	1.26651	3.00747	-0.404062	0.289908	GeneID:80832,Genbank:NM_145660.2,HGNC:HGNC:14867,MIM:607254	apolipoprotein L4	GO:0005615,GO:0006629,GO:0006869,GO:0008289,GO:0042157,GO:0043231	extracellular space|lipid metabolic process|lipid transport|lipid binding|lipoprotein metabolic process|intracellular membrane-bounded organelle
APOL6	10.8538	24.1087	10.903	10.8847	15.5213	7.62451	-0.43157	0.11201	GeneID:80830,Genbank:XM_011530392.3,HGNC:HGNC:14870,MIM:607256	apolipoprotein L6	GO:0005576,GO:0005737,GO:0006869,GO:0008289,GO:0042157	extracellular region|cytoplasm|lipid transport|lipid binding|lipoprotein metabolic process
APOLD1	9.6172	2.56735	4.35146	7.34263	1.76896	2.02035	-0.69189	0.0231529	GeneID:81575,Genbank:NM_001130415.1,HGNC:HGNC:25268,MIM:612456	apolipoprotein L domain containing 1	GO:0001525,GO:0001666,GO:0005576,GO:0005654,GO:0005829,GO:0005886,GO:0006869,GO:0008289,GO:0016021,GO:0030154,GO:0042118,GO:0042157,GO:0045601	angiogenesis|response to hypoxia|extracellular region|nucleoplasm|cytosol|plasma membrane|lipid transport|lipid binding|integral component of membrane|cell differentiation|endothelial cell activation|lipoprotein metabolic process|regulation of endothelial cell differentiation
APOO	0.688499	0.553215	0.556737	0.863697	1.36785	0.948865	0.694911	0.077031	GeneID:79135,Genbank:NM_024122.4,HGNC:HGNC:28727,MIM:300753	apolipoprotein O	GO:0000139,GO:0005576,GO:0005615,GO:0005739,GO:0005789,GO:0005829,GO:0006869,GO:0031305,GO:0034361,GO:0034362,GO:0034364,GO:0042407,GO:0061617	Golgi membrane|extracellular region|extracellular space|mitochondrion|endoplasmic reticulum membrane|cytosol|lipid transport|integral component of mitochondrial inner membrane|very-low-density lipoprotein particle|low-density lipoprotein particle|high-density lipoprotein particle|cristae formation|MICOS complex
APOOL	3.12059	3.0348	3.72704	2.98748	5.24508	3.90059	0.217216	0.507377	GeneID:139322,Genbank:XM_017029272.1,HGNC:HGNC:24009,MIM:300955	apolipoprotein O like	GO:0002576,GO:0005576,GO:0005739,GO:0031093,GO:0042407,GO:0061617	platelet degranulation|extracellular region|mitochondrion|platelet alpha granule lumen|cristae formation|MICOS complex
APOPT1	1.78823	1.36573	1.29796	1.80506	1.9567	1.65156	0.292773	0.363124	GeneID:84334,Genbank:NM_032374.4,HGNC:HGNC:20492,MIM:616003	apoptogenic 1, mitochondrial	GO:0005739,GO:0034393,GO:0043280,GO:0090200,GO:0097193	mitochondrion|positive regulation of smooth muscle cell apoptotic process|positive regulation of cysteine-type endopeptidase activity involved in apoptotic process|positive regulation of release of cytochrome c from mitochondria|intrinsic apoptotic signaling pathway
APP	64.6248	57.6705	55.3663	56.1511	39.3452	38.9661	-0.396265	0.130983	GeneID:351,Genbank:NM_001136131.2,HGNC:HGNC:620,MIM:104760	amyloid beta precursor protein	GO:0003677,GO:0004867,GO:0005737,GO:0005794,GO:0005905,GO:0006378,GO:0006417,GO:0006468,GO:0006878,GO:0006897,GO:0006915,GO:0007155,GO:0007176,GO:0007219,GO:0007409,GO:0007617,GO:0007626,GO:0008088,GO:0008201,GO:0008344,GO:0008542,GO:0016021,GO:0016199,GO:0016322,GO:0016358,GO:0030198,GO:0030424,GO:0031175,GO:0035235,GO:0040014,GO:0045931,GO:0046914,GO:0048669,GO:0050803	DNA binding|serine-type endopeptidase inhibitor activity|cytoplasm|Golgi apparatus|clathrin-coated pit|mRNA polyadenylation|regulation of translation|protein phosphorylation|cellular copper ion homeostasis|endocytosis|apoptotic process|cell adhesion|regulation of epidermal growth factor-activated receptor activity|Notch signaling pathway|axonogenesis|mating behavior|locomotory behavior|axo-dendri…	hsa04726,hsa05010	Serotonergic synapse|Alzheimer disease
APPBP2	8.8463	8.34539	7.7243	7.17483	10.2786	9.01903	0.0199493	0.944358	GeneID:10513,Genbank:NM_001282476.1,HGNC:HGNC:622,MIM:605324	amyloid beta precursor protein binding protein 2	GO:0003777,GO:0005634,GO:0005737,GO:0005874,GO:0005875,GO:0006886,GO:0030659,GO:0046907	microtubule motor activity|nucleus|cytoplasm|microtubule|microtubule associated complex|intracellular protein transport|cytoplasmic vesicle membrane|intracellular transport
APPL1	10.0431	10.5279	9.25554	8.6683	7.95126	7.83964	-0.34635	0.169497	GeneID:26060,Genbank:NM_012096.2,HGNC:HGNC:24035,MIM:604299	adaptor protein, phosphotyrosine interacting with PH domain and leucine zipper 1	GO:0005634,GO:0005769,GO:0005829,GO:0007049,GO:0007165,GO:0008283,GO:0008286,GO:0010008,GO:0012506,GO:0031901,GO:0042802,GO:0043422,GO:0046324,GO:0070062,GO:0097192,GO:1903076	nucleus|early endosome|cytosol|cell cycle|signal transduction|cell proliferation|insulin receptor signaling pathway|endosome membrane|vesicle membrane|early endosome membrane|identical protein binding|protein kinase B binding|regulation of glucose import|extracellular exosome|extrinsic apoptotic signaling pathway in absence of ligand|regulation of protein localization to plasma membrane	hsa04211,hsa05200,hsa05210	Longevity regulating pathway|Pathways in cancer|Colorectal cancer
APPL2	2.72223	1.88802	2.26758	2.29006	1.78284	1.80434	-0.297397	0.263547	GeneID:55198,Genbank:NM_018171.3,HGNC:HGNC:18242,MIM:606231	adaptor protein, phosphotyrosine interacting with PH domain and leucine zipper 2	GO:0005634,GO:0007049,GO:0007165,GO:0008283,GO:0010008,GO:0031901,GO:0070062	nucleus|cell cycle|signal transduction|cell proliferation|endosome membrane|early endosome membrane|extracellular exosome
APRT	30.4805	21.6419	17.2845	27.7535	31.1816	23.2392	0.269858	0.351648	GeneID:353,Genbank:NM_001030018.1,HGNC:HGNC:626,MIM:102600	adenine phosphoribosyltransferase			hsa00230	Purine metabolism
AQP1	204.594	268.478	182.901	173.509	107.004	1383.48	0.396739	0.791495	GeneID:358,Genbank:NM_198098.3,HGNC:HGNC:633,MIM:107776	aquaporin 1 (Colton blood group)			hsa04924,hsa04964,hsa04976	Renin secretion|Proximal tubule bicarbonate reclamation|Bile secretion
AQP3	72.537	50.078	157.701	107.599	123.223	222.618	0.82453	0.00598084	GeneID:360,Genbank:NM_001318144.1,HGNC:HGNC:636,MIM:600170	aquaporin 3 (Gill blood group)			hsa04962	Vasopressin-regulated water reabsorption
AQP4	67.016	61.7066	42.8149	42.5045	27.655	64.4272	-0.457215	0.232675	GeneID:361,Genbank:NM_001317387.2,HGNC:HGNC:637,MIM:600308	aquaporin 4			hsa04962,hsa04976	Vasopressin-regulated water reabsorption|Bile secretion
AQP5	8.66571	5.35711	6.8087	29.4585	20.2157	63.4164	2.45853	4.70474e-13	GeneID:362,Genbank:NM_001651.3,HGNC:HGNC:638,MIM:600442	aquaporin 5	GO:0005783,GO:0005886,GO:0005887,GO:0005902,GO:0006833,GO:0007588,GO:0009925,GO:0015250,GO:0015670,GO:0016324,GO:0030157,GO:0034220,GO:0042476,GO:0042802,GO:0046541,GO:0048593,GO:0070062	endoplasmic reticulum|plasma membrane|integral component of plasma membrane|microvillus|water transport|excretion|basal plasma membrane|water channel activity|carbon dioxide transport|apical plasma membrane|pancreatic juice secretion|ion transmembrane transport|odontogenesis|identical protein binding|saliva secretion|camera-type eye morphogenesis|extracellular exosome	hsa04970	Salivary secretion
AQP7	0.116717	0.17945	0.617313	0.630967	1.0525	0.738523	1.67158	0.00167782	GeneID:364,Genbank:XM_017014701.1,HGNC:HGNC:640,MIM:602974	aquaporin 7	GO:0005737,GO:0005886,GO:0005887,GO:0005911,GO:0006091,GO:0006833,GO:0007588,GO:0015250,GO:0015254,GO:0015793	cytoplasm|plasma membrane|integral component of plasma membrane|cell-cell junction|generation of precursor metabolites and energy|water transport|excretion|water channel activity|glycerol channel activity|glycerol transport	hsa03320,hsa04923	PPAR signaling pathway|Regulation of lipolysis in adipocytes
AQP9	8.8416	7.10287	4.51217	10.8407	1.65801	2.95498	-0.852907	0.0597205	GeneID:366,Genbank:NM_001320636.1,HGNC:HGNC:643,MIM:602914	aquaporin 9	GO:0005275,GO:0005345,GO:0005350,GO:0005372,GO:0005886,GO:0005887,GO:0006810,GO:0006833,GO:0006863,GO:0006955,GO:0006970,GO:0007588,GO:0008152,GO:0010033,GO:0015166,GO:0015250,GO:0015254,GO:0015265,GO:0015288,GO:0015722,GO:0015791,GO:0015793,GO:0015837,GO:0015855,GO:0016021,GO:0016323,GO:0030104,GO:0043231,GO:0046689,GO:0046942,GO:0046943,GO:0071320	amine transmembrane transporter activity|purine nucleobase transmembrane transporter activity|pyrimidine nucleobase transmembrane transporter activity|water transmembrane transporter activity|plasma membrane|integral component of plasma membrane|transport|water transport|purine nucleobase transport|immune response|response to osmotic stress|excretion|metabolic process|response to organic substanc…	hsa04976	Bile secretion
AQR	5.61707	6.02349	5.03495	5.9839	5.07092	5.82902	-0.01716	0.94812	GeneID:9716,Genbank:NM_014691.2,HGNC:HGNC:29513,MIM:610548	aquarius intron-binding spliceosomal factor	GO:0000398,GO:0003723,GO:0005654,GO:0006283,GO:0016020,GO:0071013	mRNA splicing, via spliceosome|RNA binding|nucleoplasm|transcription-coupled nucleotide-excision repair|membrane|catalytic step 2 spliceosome	hsa03040	Spliceosome
AR	1.18479	1.03866	1.08506	0.82819	0.72877	0.683787	-0.624855	0.0320863	GeneID:367,Genbank:NM_001011645.3,HGNC:HGNC:644,MIM:313700	androgen receptor			hsa04114,hsa05200,hsa05215	Oocyte meiosis|Pathways in cancer|Prostate cancer
ARAF	6.3513	6.46206	5.7152	6.86765	8.49123	6.66977	0.275835	0.293372	GeneID:369,Genbank:NM_001256196.1,HGNC:HGNC:646,MIM:311010	A-Raf proto-oncogene, serine/threonine kinase	GO:0000165,GO:0004672,GO:0004674,GO:0004709,GO:0005524,GO:0005739,GO:0005829,GO:0006464,GO:0007275,GO:0009968,GO:0030154,GO:0031434,GO:0032006,GO:0032434,GO:0033138,GO:0043066,GO:0046872,GO:0070374	MAPK cascade|protein kinase activity|protein serine/threonine kinase activity|MAP kinase kinase kinase activity|ATP binding|mitochondrion|cytosol|cellular protein modification process|multicellular organism development|negative regulation of signal transduction|cell differentiation|mitogen-activated protein kinase kinase binding|regulation of TOR signaling|regulation of proteasomal ubiquitin-depe…	hsa01521,hsa01522,hsa04010,hsa04012,hsa04068,hsa04270,hsa04650,hsa04720,hsa04726,hsa04730,hsa04810,hsa04910,hsa04914,hsa04928,hsa05034,hsa05160,hsa05200,hsa05205,hsa05210,hsa05211,hsa05212,hsa05213,hsa05214,hsa05215,hsa05218,hsa05219,hsa05220,hsa05221,hsa05223,hsa05224,hsa05225,hsa05226	EGFR tyrosine kinase inhibitor resistance|Endocrine resistance|MAPK signaling pathway|ErbB signaling pathway|FoxO signaling pathway|Vascular smooth muscle contraction|Natural killer cell mediated cytotoxicity|Long-term potentiation|Serotonergic synapse|Long-term depression|Regulation of actin cytoskeleton|Insulin signaling pathway|Progesterone-mediated oocyte maturation|Parathyroid hormone synthe…
ARAP1	18.2433	21.3362	18.3587	16.412	10.372	14.4508	-0.453986	0.144408	GeneID:116985,Genbank:NM_001040118.2,HGNC:HGNC:16925,MIM:606646	ArfGAP with RhoGAP domain, ankyrin repeat and PH domain 1	GO:0001921,GO:0005096,GO:0005547,GO:0005654,GO:0005794,GO:0005802,GO:0005829,GO:0005886,GO:0007165,GO:0008360,GO:0030037,GO:0031410,GO:0031702,GO:0032580,GO:0043231,GO:0043547,GO:0045742,GO:0046872,GO:0051056,GO:0051270,GO:0051491,GO:0051497	positive regulation of receptor recycling|GTPase activator activity|phosphatidylinositol-3,4,5-trisphosphate binding|nucleoplasm|Golgi apparatus|trans-Golgi network|cytosol|plasma membrane|signal transduction|regulation of cell shape|actin filament reorganization involved in cell cycle|cytoplasmic vesicle|type 1 angiotensin receptor binding|Golgi cisterna membrane|intracellular membrane-bounded o…	hsa04144	Endocytosis
ARAP2	11.1911	10.5847	7.09822	8.3969	5.36406	2.94438	-0.949988	0.000929924	GeneID:116984,Genbank:NM_015230.3,HGNC:HGNC:16924,MIM:606645	ArfGAP with RhoGAP domain, ankyrin repeat and PH domain 2	GO:0005096,GO:0005547,GO:0005829,GO:0007165,GO:0046872,GO:0051056	GTPase activator activity|phosphatidylinositol-3,4,5-trisphosphate binding|cytosol|signal transduction|metal ion binding|regulation of small GTPase mediated signal transduction	hsa04144	Endocytosis
ARAP3	5.23831	5.7863	4.62175	4.28691	1.43152	2.29854	-1.1006	0.00630551	GeneID:64411,Genbank:NM_022481.5,HGNC:HGNC:24097,MIM:606647	ArfGAP with RhoGAP domain, ankyrin repeat and PH domain 3	GO:0001726,GO:0005096,GO:0005547,GO:0005737,GO:0005829,GO:0005856,GO:0005886,GO:0007010,GO:0007165,GO:0008360,GO:0016192,GO:0030027,GO:0030336,GO:0035021,GO:0035024,GO:0043325,GO:0046872,GO:0051056	ruffle|GTPase activator activity|phosphatidylinositol-3,4,5-trisphosphate binding|cytoplasm|cytosol|cytoskeleton|plasma membrane|cytoskeleton organization|signal transduction|regulation of cell shape|vesicle-mediated transport|lamellipodium|negative regulation of cell migration|negative regulation of Rac protein signal transduction|negative regulation of Rho protein signal transduction|phosphatid…	hsa04015,hsa04024,hsa04144	Rap1 signaling pathway|cAMP signaling pathway|Endocytosis
ARC	2.30666	2.08973	1.82149	0.927984	0.510287	0.331117	-1.95954	2.66375e-05	GeneID:23237,Genbank:NM_015193.4,HGNC:HGNC:648,MIM:612461	activity regulated cytoskeleton associated protein	GO:0001669,GO:0005737,GO:0005768,GO:0005886,GO:0006897,GO:0007010,GO:0007492,GO:0007612,GO:0007616,GO:0009952,GO:0014069,GO:0015629,GO:0016477,GO:0022604,GO:0030054,GO:0043025,GO:0043197,GO:0045211,GO:0048168,GO:0060291,GO:0060997,GO:0061001,GO:1900271,GO:2000969	acrosomal vesicle|cytoplasm|endosome|plasma membrane|endocytosis|cytoskeleton organization|endoderm development|learning|long-term memory|anterior/posterior pattern specification|postsynaptic density|actin cytoskeleton|cell migration|regulation of cell morphogenesis|cell junction|neuronal cell body|dendritic spine|postsynaptic membrane|regulation of neuronal synaptic plasticity|long-term synaptic…	hsa05031	Amphetamine addiction
ARCN1	24.316	23.6158	20.5002	23.1272	28.2347	29.9893	0.233892	0.392566	GeneID:372,Genbank:NM_001655.4,HGNC:HGNC:649,MIM:600820	archain 1	GO:0000139,GO:0003723,GO:0005789,GO:0005829,GO:0006886,GO:0006888,GO:0006890,GO:0008344,GO:0016020,GO:0021691,GO:0030126,GO:0030133,GO:0043473	Golgi membrane|RNA binding|endoplasmic reticulum membrane|cytosol|intracellular protein transport|ER to Golgi vesicle-mediated transport|retrograde vesicle-mediated transport, Golgi to ER|adult locomotory behavior|membrane|cerebellar Purkinje cell layer maturation|COPI vesicle coat|transport vesicle|pigmentation
AREG	4.49165	13.8263	11.2745	8.29387	20.1484	6.48819	0.254095	0.545607	GeneID:374,Genbank:NM_001657.3,HGNC:HGNC:651,MIM:104640	amphiregulin			hsa04010,hsa04012,hsa04151,hsa04390,hsa05210	MAPK signaling pathway|ErbB signaling pathway|PI3K-Akt signaling pathway|Hippo signaling pathway|Colorectal cancer
AREL1	4.95351	4.96095	4.31046	4.65877	4.56534	3.91049	-0.130015	0.617256	GeneID:9870,Genbank:NM_001039479.1,HGNC:HGNC:20363,MIM:615380	apoptosis resistant E3 ubiquitin protein ligase 1	GO:0004842,GO:0005829,GO:0006915,GO:0042787,GO:0043066,GO:0061630	ubiquitin-protein transferase activity|cytosol|apoptotic process|protein ubiquitination involved in ubiquitin-dependent protein catabolic process|negative regulation of apoptotic process|ubiquitin protein ligase activity
ARF1	75.0737	63.7243	55.0942	75.9012	83.5877	119.857	0.569025	0.0476065	GeneID:375,Genbank:NM_001024226.1,HGNC:HGNC:652,MIM:103180	ADP ribosylation factor 1	GO:0000287,GO:0002090,GO:0003723,GO:0005525,GO:0005770,GO:0005794,GO:0005829,GO:0005925,GO:0006878,GO:0007015,GO:0007264,GO:0012505,GO:0014069,GO:0015031,GO:0016192,GO:0019003,GO:0019904,GO:0030017,GO:0031252,GO:0034315,GO:0034379,GO:0043005,GO:0043234,GO:0045211,GO:0045807,GO:0045956,GO:0046982,GO:0048471,GO:0050714,GO:0055108,GO:0060292,GO:0060999,GO:0070062,GO:0070142,GO:0097061,GO:0097212,GO:…	magnesium ion binding|regulation of receptor internalization|RNA binding|GTP binding|late endosome|Golgi apparatus|cytosol|focal adhesion|cellular copper ion homeostasis|actin filament organization|small GTPase mediated signal transduction|endomembrane system|postsynaptic density|protein transport|vesicle-mediated transport|GDP binding|protein domain specific binding|sarcomere|cell leading edge|r…	hsa04072,hsa04144,hsa05110,hsa05134	Phospholipase D signaling pathway|Endocytosis|Vibrio cholerae infection|Legionellosis
ARF3	23.8084	22.3091	20.6364	23.3244	19.3275	26.2898	0.0436857	0.866458	GeneID:377,Genbank:XM_006719391.4,HGNC:HGNC:654,MIM:103190	ADP ribosylation factor 3	GO:0005525,GO:0005794,GO:0006890,GO:0007264,GO:0015031,GO:0048471,GO:0070062	GTP binding|Golgi apparatus|retrograde vesicle-mediated transport, Golgi to ER|small GTPase mediated signal transduction|protein transport|perinuclear region of cytoplasm|extracellular exosome	hsa04144	Endocytosis
ARF4	48.6518	40.8467	39.314	51.1375	56.9866	76.2346	0.455363	0.125475	GeneID:378,Genbank:NM_001660.3,HGNC:HGNC:655,MIM:601177	ADP ribosylation factor 4	GO:0003924,GO:0005086,GO:0005154,GO:0005525,GO:0005794,GO:0005829,GO:0006471,GO:0006888,GO:0006890,GO:0007173,GO:0007264,GO:0007420,GO:0007612,GO:0015031,GO:0016020,GO:0016477,GO:0031012,GO:0031584,GO:0032587,GO:0043066,GO:0043197,GO:0045176,GO:0045197,GO:0045944,GO:0048678,GO:0060996,GO:0061512,GO:0070062,GO:2000377	GTPase activity|ARF guanyl-nucleotide exchange factor activity|epidermal growth factor receptor binding|GTP binding|Golgi apparatus|cytosol|protein ADP-ribosylation|ER to Golgi vesicle-mediated transport|retrograde vesicle-mediated transport, Golgi to ER|epidermal growth factor receptor signaling pathway|small GTPase mediated signal transduction|brain development|learning|protein transport|membra…
ARF5	37.3009	24.7261	24.9605	34.2262	46.0967	51.6369	0.691693	0.0247445	GeneID:381,Genbank:NM_001662.3,HGNC:HGNC:658,MIM:103188	ADP ribosylation factor 5	GO:0005525,GO:0005737,GO:0005794,GO:0005886,GO:0006890,GO:0007264,GO:0015031,GO:0048471,GO:0070062	GTP binding|cytoplasm|Golgi apparatus|plasma membrane|retrograde vesicle-mediated transport, Golgi to ER|small GTPase mediated signal transduction|protein transport|perinuclear region of cytoplasm|extracellular exosome	hsa04144	Endocytosis
ARF6	29.2347	26.9009	23.0966	26.3637	23.7157	24.476	-0.141866	0.581325	GeneID:382,Genbank:NM_001663.3,HGNC:HGNC:659,MIM:600464	ADP ribosylation factor 6	GO:0001726,GO:0001889,GO:0003924,GO:0005525,GO:0005768,GO:0005769,GO:0005794,GO:0005829,GO:0005886,GO:0005925,GO:0005938,GO:0006928,GO:0007049,GO:0007155,GO:0007264,GO:0007399,GO:0015031,GO:0016020,GO:0016192,GO:0030139,GO:0030154,GO:0030838,GO:0030866,GO:0031527,GO:0031529,GO:0031996,GO:0032154,GO:0033028,GO:0034394,GO:0035020,GO:0036010,GO:0043209,GO:0047485,GO:0048261,GO:0051301,GO:0051489,GO:…	ruffle|liver development|GTPase activity|GTP binding|endosome|early endosome|Golgi apparatus|cytosol|plasma membrane|focal adhesion|cell cortex|movement of cell or subcellular component|cell cycle|cell adhesion|small GTPase mediated signal transduction|nervous system development|protein transport|membrane|vesicle-mediated transport|endocytic vesicle|cell differentiation|positive regulation of act…	hsa04014,hsa04072,hsa04144,hsa04666	Ras signaling pathway|Phospholipase D signaling pathway|Endocytosis|Fc gamma R-mediated phagocytosis
ARFGAP1	5.82979	5.12976	4.92302	5.79898	6.10636	5.70984	0.231704	0.383715	GeneID:55738,Genbank:NM_175609.2,HGNC:HGNC:15852,MIM:608377	ADP ribosylation factor GTPase activating protein 1	GO:0005096,GO:0005794,GO:0005829,GO:0006888,GO:0006890,GO:0014069,GO:0015031,GO:0030100,GO:0036498,GO:0046872	GTPase activator activity|Golgi apparatus|cytosol|ER to Golgi vesicle-mediated transport|retrograde vesicle-mediated transport, Golgi to ER|postsynaptic density|protein transport|regulation of endocytosis|IRE1-mediated unfolded protein response|metal ion binding	hsa04144	Endocytosis
ARFGAP2	11.1346	9.53044	8.58944	10.1473	10.7684	9.52102	0.0643507	0.800136	GeneID:84364,Genbank:NM_001242832.1,HGNC:HGNC:13504,MIM:606908	ADP ribosylation factor GTPase activating protein 2	GO:0000139,GO:0005096,GO:0005794,GO:0005829,GO:0005886,GO:0006888,GO:0006890,GO:0015031,GO:0046872	Golgi membrane|GTPase activator activity|Golgi apparatus|cytosol|plasma membrane|ER to Golgi vesicle-mediated transport|retrograde vesicle-mediated transport, Golgi to ER|protein transport|metal ion binding	hsa04144	Endocytosis
ARFGAP3	11.9376	9.88481	7.58382	12.8967	13.4255	8.34465	0.225673	0.406854	GeneID:26286,Genbank:NM_001142293.1,HGNC:HGNC:661,MIM:612439	ADP ribosylation factor GTPase activating protein 3	GO:0000139,GO:0005096,GO:0005794,GO:0005829,GO:0006886,GO:0006888,GO:0006890,GO:0008565,GO:0009306,GO:0016020,GO:0016192,GO:0046872	Golgi membrane|GTPase activator activity|Golgi apparatus|cytosol|intracellular protein transport|ER to Golgi vesicle-mediated transport|retrograde vesicle-mediated transport, Golgi to ER|protein transporter activity|protein secretion|membrane|vesicle-mediated transport|metal ion binding	hsa04144	Endocytosis
ARFGEF1	7.36488	7.58241	6.83318	7.50421	6.50284	8.84515	0.0320376	0.90537	GeneID:10565,Genbank:XM_005251136.4,HGNC:HGNC:15772,MIM:604141	ADP ribosylation factor guanine nucleotide exchange factor 1	GO:0000139,GO:0005085,GO:0005086,GO:0005654,GO:0005730,GO:0005794,GO:0005802,GO:0005829,GO:0006887,GO:0007030,GO:0010256,GO:0015031,GO:0016363,GO:0017022,GO:0030532,GO:0030837,GO:0031175,GO:0032012,GO:0034237,GO:0034260,GO:0048471,GO:0051897,GO:0090284,GO:0090303,GO:2000114	Golgi membrane|guanyl-nucleotide exchange factor activity|ARF guanyl-nucleotide exchange factor activity|nucleoplasm|nucleolus|Golgi apparatus|trans-Golgi network|cytosol|exocytosis|Golgi organization|endomembrane system organization|protein transport|nuclear matrix|myosin binding|small nuclear ribonucleoprotein complex|negative regulation of actin filament polymerization|neuron projection develo…	hsa04144	Endocytosis
ARFGEF2	6.47863	6.87459	6.48576	6.52277	6.49823	7.10453	0.0269796	0.913777	GeneID:10564,Genbank:XM_005260252.3,HGNC:HGNC:15853,MIM:605371	ADP ribosylation factor guanine nucleotide exchange factor 2	GO:0000139,GO:0001881,GO:0005085,GO:0005086,GO:0005802,GO:0005815,GO:0005829,GO:0005879,GO:0006887,GO:0006893,GO:0007032,GO:0010256,GO:0015031,GO:0016020,GO:0017022,GO:0030054,GO:0031410,GO:0032012,GO:0032279,GO:0032280,GO:0032760,GO:0034237,GO:0035556,GO:0043197,GO:0048471,GO:0050811,GO:0055037	Golgi membrane|receptor recycling|guanyl-nucleotide exchange factor activity|ARF guanyl-nucleotide exchange factor activity|trans-Golgi network|microtubule organizing center|cytosol|axonemal microtubule|exocytosis|Golgi to plasma membrane transport|endosome organization|endomembrane system organization|protein transport|membrane|myosin binding|cell junction|cytoplasmic vesicle|regulation of ARF p…	hsa04144	Endocytosis
ARFGEF3	11.3824	6.06782	8.3564	11.78	12.5242	5.50942	0.141357	0.709328	GeneID:57221,Genbank:NM_020340.4,HGNC:HGNC:21213,MIM:617411	ARFGEF family member 3	GO:0005086,GO:0010923,GO:0016021,GO:0030658,GO:0032012	ARF guanyl-nucleotide exchange factor activity|negative regulation of phosphatase activity|integral component of membrane|transport vesicle membrane|regulation of ARF protein signal transduction
ARFIP1	3.82414	3.9882	4.23808	3.97908	4.06433	4.94446	0.023696	0.929449	GeneID:27236,Genbank:NM_001287432.1,HGNC:HGNC:21496,MIM:605928	ADP ribosylation factor interacting protein 1	GO:0000139,GO:0005829,GO:0006886,GO:0019904,GO:0032588,GO:0034315,GO:0045296,GO:0050708,GO:0070273	Golgi membrane|cytosol|intracellular protein transport|protein domain specific binding|trans-Golgi network membrane|regulation of Arp2/3 complex-mediated actin nucleation|cadherin binding|regulation of protein secretion|phosphatidylinositol-4-phosphate binding
ARFIP2	3.20535	1.97415	2.17686	3.05192	3.34648	2.49917	0.352381	0.229622	GeneID:23647,Genbank:NM_001242856.1,HGNC:HGNC:17160,MIM:601638	ADP ribosylation factor interacting protein 2	GO:0001726,GO:0005525,GO:0005737,GO:0005829,GO:0005886,GO:0005938,GO:0006928,GO:0007264,GO:0019904,GO:0030032,GO:0030036,GO:0030742,GO:0031529,GO:0032588,GO:0034315,GO:0042802,GO:0045296,GO:0048365,GO:0070273	ruffle|GTP binding|cytoplasm|cytosol|plasma membrane|cell cortex|movement of cell or subcellular component|small GTPase mediated signal transduction|protein domain specific binding|lamellipodium assembly|actin cytoskeleton organization|GTP-dependent protein binding|ruffle organization|trans-Golgi network membrane|regulation of Arp2/3 complex-mediated actin nucleation|identical protein binding|cad…
ARFRP1	5.77507	4.12913	4.17828	5.12383	5.75618	3.8774	0.0913887	0.755469	GeneID:10139,Genbank:NM_001267546.2,HGNC:HGNC:662,MIM:604699	ADP ribosylation factor related protein 1	GO:0003924,GO:0005525,GO:0005794,GO:0005802,GO:0005829,GO:0007165,GO:0007264,GO:0007369,GO:0016020,GO:0032588,GO:0034067,GO:0042147,GO:0043001	GTPase activity|GTP binding|Golgi apparatus|trans-Golgi network|cytosol|signal transduction|small GTPase mediated signal transduction|gastrulation|membrane|trans-Golgi network membrane|protein localization to Golgi apparatus|retrograde transport, endosome to Golgi|Golgi to plasma membrane protein transport
ARG2	1.01358	0.765277	0.327113	0.558433	4.05836	0.124072	-0.127913	0.860693	GeneID:384,Genbank:NM_001172.3,HGNC:HGNC:664,MIM:107830	arginase 2			hsa00220,hsa00330,hsa05146	Arginine biosynthesis|Arginine and proline metabolism|Amoebiasis
ARGLU1	24.7598	16.0282	18.0164	25.3274	13.0209	7.35272	-0.540037	0.143792	GeneID:55082,Genbank:NM_018011.3,HGNC:HGNC:25482,MIM:614046	arginine and glutamate rich 1
ARHGAP1	10.8068	10.6083	10.5125	11.4309	15.399	14.2685	0.415234	0.108567	GeneID:392,Genbank:NM_004308.3,HGNC:HGNC:673,MIM:602732	Rho GTPase activating protein 1	GO:0005070,GO:0005096,GO:0005737,GO:0005829,GO:0007264,GO:0007266,GO:0010008,GO:0017124,GO:0017137,GO:0032439,GO:0033572,GO:0045296,GO:0048471,GO:0051056,GO:0070062,GO:0098706,GO:2001136	SH3/SH2 adaptor activity|GTPase activator activity|cytoplasm|cytosol|small GTPase mediated signal transduction|Rho protein signal transduction|endosome membrane|SH3 domain binding|Rab GTPase binding|endosome localization|transferrin transport|cadherin binding|perinuclear region of cytoplasm|regulation of small GTPase mediated signal transduction|extracellular exosome|ferric iron import across pla…
ARHGAP10	3.88313	4.56385	3.05834	4.63913	3.94162	2.16763	-0.166633	0.601595	GeneID:79658,Genbank:XM_005263215.3,HGNC:HGNC:26099,MIM:609746	Rho GTPase activating protein 10	GO:0005096,GO:0005829,GO:0005886,GO:0007010,GO:0007165,GO:0043066,GO:0048471,GO:0051056	GTPase activator activity|cytosol|plasma membrane|cytoskeleton organization|signal transduction|negative regulation of apoptotic process|perinuclear region of cytoplasm|regulation of small GTPase mediated signal transduction	hsa05100	Bacterial invasion of epithelial cells
ARHGAP12	8.34849	7.25748	7.28625	9.45537	7.70718	10.6181	0.256758	0.333384	GeneID:94134,Genbank:NM_001270698.1,HGNC:HGNC:16348,MIM:610577	Rho GTPase activating protein 12	GO:0001891,GO:0002011,GO:0005096,GO:0005829,GO:0006911,GO:0007015,GO:0007165,GO:0051056,GO:0051058	phagocytic cup|morphogenesis of an epithelial sheet|GTPase activator activity|cytosol|phagocytosis, engulfment|actin filament organization|signal transduction|regulation of small GTPase mediated signal transduction|negative regulation of small GTPase mediated signal transduction
ARHGAP15	1.27676	1.86633	2.00871	2.12249	0.919076	1.08365	-0.567322	0.149621	GeneID:55843,Genbank:XM_011511479.2,HGNC:HGNC:21030,MIM:610578	Rho GTPase activating protein 15	GO:0005096,GO:0005829,GO:0007165,GO:0008360,GO:0016020,GO:0051056	GTPase activator activity|cytosol|signal transduction|regulation of cell shape|membrane|regulation of small GTPase mediated signal transduction
ARHGAP17	5.24863	4.95394	4.72576	4.23751	3.05778	4.56111	-0.301677	0.279817	GeneID:55114,Genbank:NM_018054.5,HGNC:HGNC:18239,MIM:608293	Rho GTPase activating protein 17	GO:0005096,GO:0005634,GO:0005829,GO:0005886,GO:0005923,GO:0007165,GO:0017124,GO:0051056	GTPase activator activity|nucleus|cytosol|plasma membrane|bicellular tight junction|signal transduction|SH3 domain binding|regulation of small GTPase mediated signal transduction	hsa04530	Tight junction
ARHGAP18	15.3691	15.4917	10.8845	13.5944	8.20975	6.61464	-0.645927	0.0236234	GeneID:93663,Genbank:XM_005267213.1,HGNC:HGNC:21035,MIM:613351	Rho GTPase activating protein 18	GO:0005096,GO:0005737,GO:0005829,GO:0005886,GO:0007264,GO:0008360,GO:0016607,GO:0030833,GO:0032956,GO:0045296,GO:0051056,GO:2000145	GTPase activator activity|cytoplasm|cytosol|plasma membrane|small GTPase mediated signal transduction|regulation of cell shape|nuclear speck|regulation of actin filament polymerization|regulation of actin cytoskeleton organization|cadherin binding|regulation of small GTPase mediated signal transduction|regulation of cell motility
ARHGAP19	2.581	2.45924	2.5646	2.15605	1.64309	2.4504	-0.323226	0.26267	GeneID:84986,Genbank:NM_001204300.1,HGNC:HGNC:23724,MIM:611587	Rho GTPase activating protein 19	GO:0005096,GO:0005634,GO:0005829,GO:0005886,GO:0007165,GO:0043231,GO:0051056	GTPase activator activity|nucleus|cytosol|plasma membrane|signal transduction|intracellular membrane-bounded organelle|regulation of small GTPase mediated signal transduction
ARHGAP20	1.53903	1.70664	2.32619	1.14782	1.73137	2.88644	-0.0396457	0.895955	GeneID:57569,Genbank:NM_001258418.1,HGNC:HGNC:18357,MIM:609568	Rho GTPase activating protein 20
ARHGAP21	5.82941	5.56185	5.08548	4.61152	3.3363	3.29565	-0.60127	0.0237816	GeneID:57584,Genbank:NM_020824.3,HGNC:HGNC:23725,MIM:609870	Rho GTPase activating protein 21	GO:0000139,GO:0005096,GO:0005794,GO:0005829,GO:0005886,GO:0007030,GO:0007165,GO:0015629,GO:0030054,GO:0030659,GO:0043547,GO:0051056,GO:0051683,GO:0051684,GO:0072384	Golgi membrane|GTPase activator activity|Golgi apparatus|cytosol|plasma membrane|Golgi organization|signal transduction|actin cytoskeleton|cell junction|cytoplasmic vesicle membrane|positive regulation of GTPase activity|regulation of small GTPase mediated signal transduction|establishment of Golgi localization|maintenance of Golgi location|organelle transport along microtubule
ARHGAP23	8.03703	9.50233	6.63721	6.19946	3.76046	2.36523	-1.05136	0.00276251	GeneID:57636,Genbank:XM_006721991.1,HGNC:HGNC:29293,MIM:610590	Rho GTPase activating protein 23	GO:0005096,GO:0005829,GO:0007165,GO:0043547,GO:0051056,GO:0070062	GTPase activator activity|cytosol|signal transduction|positive regulation of GTPase activity|regulation of small GTPase mediated signal transduction|extracellular exosome
ARHGAP24	1.62106	1.44695	1.46136	1.71942	1.47416	1.00626	-0.210036	0.474221	GeneID:83478,Genbank:NM_001025616.2,HGNC:HGNC:25361,MIM:610586	Rho GTPase activating protein 24	GO:0001525,GO:0005096,GO:0005829,GO:0005856,GO:0005925,GO:0007165,GO:0030154,GO:0042995,GO:0051056	angiogenesis|GTPase activator activity|cytosol|cytoskeleton|focal adhesion|signal transduction|cell differentiation|cell projection|regulation of small GTPase mediated signal transduction
ARHGAP25	3.22913	4.19848	3.17519	3.35559	1.32882	1.28526	-1.02308	0.0126071	GeneID:9938,Genbank:XM_011533207.3,HGNC:HGNC:28951,MIM:610587	Rho GTPase activating protein 25	GO:0001891,GO:0005096,GO:0005829,GO:0006911,GO:0007015,GO:0007165,GO:0051056,GO:0051058	phagocytic cup|GTPase activator activity|cytosol|phagocytosis, engulfment|actin filament organization|signal transduction|regulation of small GTPase mediated signal transduction|negative regulation of small GTPase mediated signal transduction
ARHGAP26	2.76893	3.67577	2.95863	3.32002	4.81495	3.00762	0.199797	0.455958	GeneID:23092,Genbank:XM_005268402.4,HGNC:HGNC:17073,MIM:605370	Rho GTPase activating protein 26
ARHGAP27	5.60858	7.4101	6.00762	4.91965	6.81218	8.80061	0.149988	0.575117	GeneID:201176,Genbank:NM_001282290.1,HGNC:HGNC:31813,MIM:610591	Rho GTPase activating protein 27	GO:0005096,GO:0005622,GO:0005634,GO:0005654,GO:0005829,GO:0006898,GO:0007165,GO:0016020,GO:0017124,GO:0043547	GTPase activator activity|intracellular|nucleus|nucleoplasm|cytosol|receptor-mediated endocytosis|signal transduction|membrane|SH3 domain binding|positive regulation of GTPase activity
ARHGAP28	2.37523	1.77476	1.75859	2.01752	1.89276	1.03998	-0.33556	0.309229	GeneID:79822,Genbank:XM_005258144.1,HGNC:HGNC:25509,MIM:610592	Rho GTPase activating protein 28	GO:0005096,GO:0005829,GO:0007165,GO:0051056,GO:0051497,GO:1904425	GTPase activator activity|cytosol|signal transduction|regulation of small GTPase mediated signal transduction|negative regulation of stress fiber assembly|negative regulation of GTP binding
ARHGAP29	13.038	13.5692	11.3483	10.5845	5.01276	7.31154	-0.844384	0.00710832	GeneID:9411,Genbank:NM_001328665.1,HGNC:HGNC:30207,MIM:610496	Rho GTPase activating protein 29	GO:0005096,GO:0005737,GO:0005829,GO:0007266,GO:0030165,GO:0046872,GO:0051056	GTPase activator activity|cytoplasm|cytosol|Rho protein signal transduction|PDZ domain binding|metal ion binding|regulation of small GTPase mediated signal transduction
ARHGAP30	7.87141	10.5411	7.67603	8.45909	3.46694	4.41965	-0.759641	0.0500467	GeneID:257106,Genbank:XM_005245073.3,HGNC:HGNC:27414,MIM:614264	Rho GTPase activating protein 30	GO:0005096,GO:0005829,GO:0007264,GO:0031410,GO:0043231,GO:0051056	GTPase activator activity|cytosol|small GTPase mediated signal transduction|cytoplasmic vesicle|intracellular membrane-bounded organelle|regulation of small GTPase mediated signal transduction
ARHGAP31	17.5697	19.9803	14.1966	13.9985	9.37724	22.6301	-0.23066	0.525391	GeneID:57514,Genbank:XM_006713714.3,HGNC:HGNC:29216,MIM:610911	Rho GTPase activating protein 31	GO:0005096,GO:0005829,GO:0005925,GO:0007264,GO:0017124,GO:0030027,GO:0051056	GTPase activator activity|cytosol|focal adhesion|small GTPase mediated signal transduction|SH3 domain binding|lamellipodium|regulation of small GTPase mediated signal transduction
ARHGAP32	2.70433	1.93335	2.13179	2.33878	4.33244	3.03743	0.496394	0.155366	GeneID:9743,Genbank:XM_017018595.2,HGNC:HGNC:17399,MIM:608541	Rho GTPase activating protein 32	GO:0000139,GO:0001650,GO:0005096,GO:0005654,GO:0005789,GO:0005794,GO:0005829,GO:0005938,GO:0007264,GO:0010008,GO:0014069,GO:0015629,GO:0030054,GO:0035091,GO:0043197,GO:0045211,GO:0051056	Golgi membrane|fibrillar center|GTPase activator activity|nucleoplasm|endoplasmic reticulum membrane|Golgi apparatus|cytosol|cell cortex|small GTPase mediated signal transduction|endosome membrane|postsynaptic density|actin cytoskeleton|cell junction|phosphatidylinositol binding|dendritic spine|postsynaptic membrane|regulation of small GTPase mediated signal transduction
ARHGAP35	10.938	11.4728	9.15594	8.9279	8.58479	15.0757	0.028288	0.92811	GeneID:2909,Genbank:XM_024451473.1,HGNC:HGNC:4591,MIM:605277	Rho GTPase activating protein 35	GO:0000122,GO:0000977,GO:0001227,GO:0001843,GO:0003677,GO:0003714,GO:0003924,GO:0005096,GO:0005525,GO:0005543,GO:0005634,GO:0005737,GO:0005829,GO:0005886,GO:0006351,GO:0007165,GO:0007411,GO:0007413,GO:0008064,GO:0008360,GO:0010976,GO:0015629,GO:0016477,GO:0021955,GO:0030879,GO:0030900,GO:0030950,GO:0031668,GO:0032956,GO:0035024,GO:0036064,GO:0043010,GO:0043116,GO:0044319,GO:0045724,GO:0045892,GO:…	negative regulation of transcription from RNA polymerase II promoter|RNA polymerase II regulatory region sequence-specific DNA binding|transcriptional repressor activity, RNA polymerase II transcription regulatory region sequence-specific DNA binding|neural tube closure|DNA binding|transcription corepressor activity|GTPase activity|GTPase activator activity|GTP binding|phospholipid binding|nucleu…	hsa04510,hsa04611,hsa04670,hsa04810	Focal adhesion|Platelet activation|Leukocyte transendothelial migration|Regulation of actin cytoskeleton
ARHGAP39	1.0016	0.265426	0.58835	0.68615	0.852844	0.830465	0.564528	0.226105	GeneID:80728,Genbank:XM_011517308.1,HGNC:HGNC:29351,MIM:615880	Rho GTPase activating protein 39	GO:0005096,GO:0005634,GO:0005829,GO:0005856,GO:0007165,GO:0051056	GTPase activator activity|nucleus|cytosol|cytoskeleton|signal transduction|regulation of small GTPase mediated signal transduction
ARHGAP4	8.66164	8.80296	7.09644	8.75171	3.59635	3.28085	-0.794602	0.0496408	GeneID:393,Genbank:NM_001666.4,HGNC:HGNC:674,MIM:300023	Rho GTPase activating protein 4	GO:0005070,GO:0005096,GO:0005737,GO:0005794,GO:0005829,GO:0005874,GO:0007010,GO:0007266,GO:0010764,GO:0030336,GO:0030426,GO:0030517,GO:0042802,GO:0048365,GO:0051056	SH3/SH2 adaptor activity|GTPase activator activity|cytoplasm|Golgi apparatus|cytosol|microtubule|cytoskeleton organization|Rho protein signal transduction|negative regulation of fibroblast migration|negative regulation of cell migration|growth cone|negative regulation of axon extension|identical protein binding|Rac GTPase binding|regulation of small GTPase mediated signal transduction
ARHGAP40	0.246343	0.184579	0.238929	0.873348	1.24709	2.33768	2.80977	5.53569e-12	GeneID:343578,Genbank:NM_001164431.1,HGNC:HGNC:16226	Rho GTPase activating protein 40	GO:0005096,GO:0005829,GO:0007165,GO:0051056	GTPase activator activity|cytosol|signal transduction|regulation of small GTPase mediated signal transduction
ARHGAP42	2.56968	2.06033	2.47363	2.91652	3.01835	0.817566	-0.337462	0.456071	GeneID:143872,Genbank:NM_152432.3,HGNC:HGNC:26545,MIM:615936	Rho GTPase activating protein 42	GO:0003085,GO:0005096,GO:0007165,GO:0035024,GO:0090630,GO:1904694	negative regulation of systemic arterial blood pressure|GTPase activator activity|signal transduction|negative regulation of Rho protein signal transduction|activation of GTPase activity|negative regulation of vascular smooth muscle contraction
ARHGAP44	10.7215	8.77177	7.1881	7.67875	4.30971	14.7303	-0.129423	0.747296	GeneID:9912,Genbank:NM_001321167.1,HGNC:HGNC:29096,MIM:617716	Rho GTPase activating protein 44	GO:0005096,GO:0005543,GO:0005829,GO:0006887,GO:0007165,GO:0030054,GO:0031256,GO:0032956,GO:0035021,GO:0043197,GO:0048365,GO:0051056,GO:0055037,GO:0061001,GO:0098886,GO:0098887	GTPase activator activity|phospholipid binding|cytosol|exocytosis|signal transduction|cell junction|leading edge membrane|regulation of actin cytoskeleton organization|negative regulation of Rac protein signal transduction|dendritic spine|Rac GTPase binding|regulation of small GTPase mediated signal transduction|recycling endosome|regulation of dendritic spine morphogenesis|modification of dendri…
ARHGAP45	7.93323	9.27326	7.38189	7.62781	5.13205	5.23467	-0.423279	0.182246	GeneID:23526,Genbank:NM_001258328.2,HGNC:HGNC:17102,MIM:601155	Rho GTPase activating protein 45	GO:0005096,GO:0005576,GO:0005829,GO:0016020,GO:0032587,GO:0034774,GO:0035556,GO:0035578,GO:0043312,GO:0046872,GO:0051056	GTPase activator activity|extracellular region|cytosol|membrane|ruffle membrane|secretory granule lumen|intracellular signal transduction|azurophil granule lumen|neutrophil degranulation|metal ion binding|regulation of small GTPase mediated signal transduction
ARHGAP5	11.9174	11.314	10.922	10.0181	15.1815	11.3247	0.0108825	0.969925	GeneID:394,Genbank:XM_005267636.4,HGNC:HGNC:675,MIM:602680	Rho GTPase activating protein 5	GO:0003924,GO:0005096,GO:0005525,GO:0005737,GO:0005783,GO:0005829,GO:0007155,GO:0007266,GO:0016020,GO:0030879,GO:0042169,GO:0051056	GTPase activity|GTPase activator activity|GTP binding|cytoplasm|endoplasmic reticulum|cytosol|cell adhesion|Rho protein signal transduction|membrane|mammary gland development|SH2 domain binding|regulation of small GTPase mediated signal transduction	hsa04510,hsa04670	Focal adhesion|Leukocyte transendothelial migration
ARHGAP6	2.96158	3.26172	2.12351	2.25771	0.597242	0.536769	-1.59203	0.000531311	GeneID:395,Genbank:NM_013427.2,HGNC:HGNC:676,MIM:300118	Rho GTPase activating protein 6	GO:0005070,GO:0005096,GO:0005737,GO:0005829,GO:0005884,GO:0007202,GO:0007266,GO:0010518,GO:0015629,GO:0016004,GO:0017124,GO:0030041,GO:0043274,GO:0048041,GO:0051056,GO:0051497,GO:0051895	SH3/SH2 adaptor activity|GTPase activator activity|cytoplasm|cytosol|actin filament|activation of phospholipase C activity|Rho protein signal transduction|positive regulation of phospholipase activity|actin cytoskeleton|phospholipase activator activity|SH3 domain binding|actin filament polymerization|phospholipase binding|focal adhesion assembly|regulation of small GTPase mediated signal transduc…
ARHGAP8	2.0467e-05	0.84875	1.06888	1.46082	5.61461	3.52939	0.440476	0.69753	GeneID:23779,Genbank:NM_001017526.1,HGNC:HGNC:677,MIM:609405	Rho GTPase activating protein 8	GO:0005096,GO:0005737,GO:0005829,GO:0007165,GO:0051056,GO:0070374	GTPase activator activity|cytoplasm|cytosol|signal transduction|regulation of small GTPase mediated signal transduction|positive regulation of ERK1 and ERK2 cascade
ARHGAP9	2.35556	2.9846	2.26714	3.111	1.08164	1.20455	-0.738702	0.0887975	GeneID:64333,Genbank:NM_001319850.1,HGNC:HGNC:14130,MIM:610576	Rho GTPase activating protein 9	GO:0005096,GO:0005547,GO:0005576,GO:0005829,GO:0007165,GO:0034774,GO:0043312,GO:0051056	GTPase activator activity|phosphatidylinositol-3,4,5-trisphosphate binding|extracellular region|cytosol|signal transduction|secretory granule lumen|neutrophil degranulation|regulation of small GTPase mediated signal transduction
ARHGDIA	46.0504	40.9818	34.5696	40.5492	33.487	29.1303	-0.14875	0.574149	GeneID:396,Genbank:NM_001185078.2,HGNC:HGNC:678,MIM:601925	Rho GDP dissociation inhibitor alpha	GO:0005094,GO:0005096,GO:0005829,GO:0005856,GO:0006928,GO:0007162,GO:0035023,GO:0043066,GO:0050771,GO:0050772,GO:0051056,GO:0070062,GO:0071526,GO:2000249	Rho GDP-dissociation inhibitor activity|GTPase activator activity|cytosol|cytoskeleton|movement of cell or subcellular component|negative regulation of cell adhesion|regulation of Rho protein signal transduction|negative regulation of apoptotic process|negative regulation of axonogenesis|positive regulation of axonogenesis|regulation of small GTPase mediated signal transduction|extracellular exos…	hsa04722,hsa04962	Neurotrophin signaling pathway|Vasopressin-regulated water reabsorption
ARHGDIB	40.9784	33.956	38.4773	57.3018	31.0862	46.9612	0.219262	0.421209	GeneID:397,Genbank:NM_001175.6,HGNC:HGNC:679,MIM:602843	Rho GDP dissociation inhibitor beta	GO:0003924,GO:0005094,GO:0005096,GO:0005737,GO:0005829,GO:0005856,GO:0006928,GO:0007162,GO:0007275,GO:0016020,GO:0031410,GO:0035023,GO:0048365,GO:0051056,GO:0070062,GO:0071461,GO:1901164,GO:2000249	GTPase activity|Rho GDP-dissociation inhibitor activity|GTPase activator activity|cytoplasm|cytosol|cytoskeleton|movement of cell or subcellular component|negative regulation of cell adhesion|multicellular organism development|membrane|cytoplasmic vesicle|regulation of Rho protein signal transduction|Rac GTPase binding|regulation of small GTPase mediated signal transduction|extracellular exosome|…	hsa04722,hsa04962	Neurotrophin signaling pathway|Vasopressin-regulated water reabsorption
ARHGEF1	19.9493	18.0911	16.8108	18.8554	12.1497	16.2546	-0.249114	0.385057	GeneID:9138,Genbank:NM_004706.3,HGNC:HGNC:681,MIM:601855	Rho guanine nucleotide exchange factor 1	GO:0003723,GO:0005085,GO:0005089,GO:0005096,GO:0005737,GO:0005829,GO:0005886,GO:0007186,GO:0007266,GO:0008283,GO:0035023,GO:0043065,GO:0051056	RNA binding|guanyl-nucleotide exchange factor activity|Rho guanyl-nucleotide exchange factor activity|GTPase activator activity|cytoplasm|cytosol|plasma membrane|G-protein coupled receptor signaling pathway|Rho protein signal transduction|cell proliferation|regulation of Rho protein signal transduction|positive regulation of apoptotic process|regulation of small GTPase mediated signal transduction	hsa04270,hsa04611,hsa04810,hsa04928,hsa05163,hsa05200,hsa05205	Vascular smooth muscle contraction|Platelet activation|Regulation of actin cytoskeleton|Parathyroid hormone synthesis, secretion and action|Human cytomegalovirus infection|Pathways in cancer|Proteoglycans in cancer
ARHGEF10	6.23047	6.21915	5.07583	4.73256	2.39413	2.20037	-0.91142	0.00500652	GeneID:9639,Genbank:NM_001308153.1,HGNC:HGNC:14103,MIM:608136	Rho guanine nucleotide exchange factor 10	GO:0005089,GO:0005813,GO:0005829,GO:0019894,GO:0022011,GO:0035023,GO:0051298,GO:0051496,GO:0090307,GO:0090630	Rho guanyl-nucleotide exchange factor activity|centrosome|cytosol|kinesin binding|myelination in peripheral nervous system|regulation of Rho protein signal transduction|centrosome duplication|positive regulation of stress fiber assembly|mitotic spindle assembly|activation of GTPase activity
ARHGEF10L	2.048	2.58663	2.27218	2.686	2.82916	3.95902	0.522473	0.0546302	GeneID:55160,Genbank:XM_024448061.1,HGNC:HGNC:25540,MIM:612494	Rho guanine nucleotide exchange factor 10 like	GO:0005089,GO:0005737,GO:0035023	Rho guanyl-nucleotide exchange factor activity|cytoplasm|regulation of Rho protein signal transduction
ARHGEF11	4.2189	4.19807	3.60732	3.7909	3.68512	6.32574	0.243846	0.41522	GeneID:9826,Genbank:XM_006711663.3,HGNC:HGNC:14580,MIM:605708	Rho guanine nucleotide exchange factor 11	GO:0001558,GO:0001664,GO:0005085,GO:0005089,GO:0005096,GO:0005737,GO:0005829,GO:0006941,GO:0007186,GO:0007266,GO:0016020,GO:0030010,GO:0030036,GO:0035023,GO:0043065,GO:0045893,GO:0051056	regulation of cell growth|G-protein coupled receptor binding|guanyl-nucleotide exchange factor activity|Rho guanyl-nucleotide exchange factor activity|GTPase activator activity|cytoplasm|cytosol|striated muscle contraction|G-protein coupled receptor signaling pathway|Rho protein signal transduction|membrane|establishment of cell polarity|actin cytoskeleton organization|regulation of Rho protein s…	hsa04270,hsa04928,hsa05163,hsa05200	Vascular smooth muscle contraction|Parathyroid hormone synthesis, secretion and action|Human cytomegalovirus infection|Pathways in cancer
ARHGEF12	22.3348	20.7462	20.1943	17.8097	20.6615	21.4981	-0.107997	0.676637	GeneID:23365,Genbank:XM_017017420.1,HGNC:HGNC:14193,MIM:604763	Rho guanine nucleotide exchange factor 12			hsa04270,hsa04360,hsa04611,hsa04625,hsa04810,hsa05152,hsa05163,hsa05200,hsa05205	Vascular smooth muscle contraction|Axon guidance|Platelet activation|C-type lectin receptor signaling pathway|Regulation of actin cytoskeleton|Tuberculosis|Human cytomegalovirus infection|Pathways in cancer|Proteoglycans in cancer
ARHGEF15	5.48996	7.99677	6.70122	4.47567	1.10214	1.56288	-1.80033	0.000350407	GeneID:22899,Genbank:NM_173728.3,HGNC:HGNC:15590,MIM:608504	Rho guanine nucleotide exchange factor 15	GO:0005089,GO:0005096,GO:0005737,GO:0030425,GO:0035023,GO:0050790,GO:0051496,GO:0061299,GO:2000297	Rho guanyl-nucleotide exchange factor activity|GTPase activator activity|cytoplasm|dendrite|regulation of Rho protein signal transduction|regulation of catalytic activity|positive regulation of stress fiber assembly|retina vasculature morphogenesis in camera-type eye|negative regulation of synapse maturation
ARHGEF16	1.22606	0.738454	0.940066	1.21402	4.67458	2.14456	1.25928	0.00844192	GeneID:27237,Genbank:NM_014448.3,HGNC:HGNC:15515	Rho guanine nucleotide exchange factor 16	GO:0005085,GO:0005089,GO:0005829,GO:0007186,GO:0017048,GO:0030165,GO:0030971,GO:0035023,GO:0043065,GO:0045296,GO:0051056,GO:0060326,GO:0090630,GO:1903078	guanyl-nucleotide exchange factor activity|Rho guanyl-nucleotide exchange factor activity|cytosol|G-protein coupled receptor signaling pathway|Rho GTPase binding|PDZ domain binding|receptor tyrosine kinase binding|regulation of Rho protein signal transduction|positive regulation of apoptotic process|cadherin binding|regulation of small GTPase mediated signal transduction|cell chemotaxis|activatio…
ARHGEF17	8.12905	6.82293	7.1907	6.66969	5.25225	8.26895	-0.0889297	0.727851	GeneID:9828,Genbank:XM_017018623.1,HGNC:HGNC:21726,MIM:617043	Rho guanine nucleotide exchange factor 17
ARHGEF18	6.2616	5.51332	5.08477	5.1802	3.91947	4.50784	-0.263925	0.310266	GeneID:23370,Genbank:XM_006722706.3,HGNC:HGNC:17090,MIM:616432	Rho/Rac guanine nucleotide exchange factor 18	GO:0005085,GO:0005089,GO:0005829,GO:0005856,GO:0005886,GO:0007179,GO:0007186,GO:0007264,GO:0008360,GO:0016324,GO:0030036,GO:0030054,GO:0035023,GO:0043065,GO:0045177,GO:0051056,GO:0070062	guanyl-nucleotide exchange factor activity|Rho guanyl-nucleotide exchange factor activity|cytosol|cytoskeleton|plasma membrane|transforming growth factor beta receptor signaling pathway|G-protein coupled receptor signaling pathway|small GTPase mediated signal transduction|regulation of cell shape|apical plasma membrane|actin cytoskeleton organization|cell junction|regulation of Rho protein signal…	hsa04530	Tight junction
ARHGEF19	1.40346	1.36198	2.00289	2.40342	11.4774	7.98357	2.02754	6.24002e-06	GeneID:128272,Genbank:NM_153213.4,HGNC:HGNC:26604,MIM:612496	Rho guanine nucleotide exchange factor 19	GO:0005085,GO:0005089,GO:0005096,GO:0005829,GO:0007186,GO:0032956,GO:0035023,GO:0042060,GO:0043065,GO:0051056,GO:0060071	guanyl-nucleotide exchange factor activity|Rho guanyl-nucleotide exchange factor activity|GTPase activator activity|cytosol|G-protein coupled receptor signaling pathway|regulation of actin cytoskeleton organization|regulation of Rho protein signal transduction|wound healing|positive regulation of apoptotic process|regulation of small GTPase mediated signal transduction|Wnt signaling pathway, plan…
ARHGEF2	7.18383	11.3196	10.3839	7.69158	10.521	28.0895	0.505315	0.147359	GeneID:9181,Genbank:NM_001350112.1,HGNC:HGNC:682,MIM:607560	Rho/Rac guanine nucleotide exchange factor 2			hsa04530,hsa05130,hsa05418	Tight junction|Pathogenic Escherichia coli infection|Fluid shear stress and atherosclerosis
ARHGEF25	3.32787	2.49946	2.82461	3.13244	0.812682	0.986721	-1.09205	0.0133541	GeneID:115557,Genbank:NM_001111270.2,HGNC:HGNC:30275,MIM:610215	Rho guanine nucleotide exchange factor 25	GO:0005089,GO:0005829,GO:0005886,GO:0007186,GO:0030016,GO:0030017,GO:0035023	Rho guanyl-nucleotide exchange factor activity|cytosol|plasma membrane|G-protein coupled receptor signaling pathway|myofibril|sarcomere|regulation of Rho protein signal transduction
ARHGEF26	13.5046	12.9805	8.44222	8.22473	2.9903	3.35077	-1.40689	5.2148e-05	GeneID:26084,Genbank:NM_001251962.1,HGNC:HGNC:24490,MIM:617552	Rho guanine nucleotide exchange factor 26	GO:0001726,GO:0001886,GO:0005085,GO:0005089,GO:0005829,GO:0007186,GO:0035023,GO:0043065,GO:0051056,GO:0097178	ruffle|endothelial cell morphogenesis|guanyl-nucleotide exchange factor activity|Rho guanyl-nucleotide exchange factor activity|cytosol|G-protein coupled receptor signaling pathway|regulation of Rho protein signal transduction|positive regulation of apoptotic process|regulation of small GTPase mediated signal transduction|ruffle assembly	hsa05100	Bacterial invasion of epithelial cells
ARHGEF28	2.32056	1.59218	2.02822	2.31824	3.63038	2.27312	0.44084	0.203261	GeneID:64283,Genbank:NM_001080479.2,HGNC:HGNC:30322,MIM:612790	Rho guanine nucleotide exchange factor 28	GO:0003723,GO:0005085,GO:0005089,GO:0005829,GO:0005886,GO:0030154,GO:0035023,GO:0035556,GO:0046872,GO:0048013	RNA binding|guanyl-nucleotide exchange factor activity|Rho guanyl-nucleotide exchange factor activity|cytosol|plasma membrane|cell differentiation|regulation of Rho protein signal transduction|intracellular signal transduction|metal ion binding|ephrin receptor signaling pathway
ARHGEF3	7.08142	7.61046	4.83762	6.3313	3.02622	3.67445	-0.637782	0.0547578	GeneID:50650,Genbank:NM_001128615.1,HGNC:HGNC:683,MIM:612115	Rho guanine nucleotide exchange factor 3	GO:0005085,GO:0005089,GO:0005622,GO:0005829,GO:0007186,GO:0007266,GO:0035023,GO:0043065,GO:0051056	guanyl-nucleotide exchange factor activity|Rho guanyl-nucleotide exchange factor activity|intracellular|cytosol|G-protein coupled receptor signaling pathway|Rho protein signal transduction|regulation of Rho protein signal transduction|positive regulation of apoptotic process|regulation of small GTPase mediated signal transduction
ARHGEF35	1.60526	1.09409	1.02261	1.23475	3.02876	2.03846	0.726695	0.109114	GeneID:445328,Genbank:NM_001003702.2,HGNC:HGNC:33846	Rho guanine nucleotide exchange factor 35
ARHGEF37	3.35099	1.20872	1.77874	2.4612	1.4736	1.38496	-0.127029	0.690114	GeneID:389337,Genbank:XM_011537642.3,HGNC:HGNC:34430	Rho guanine nucleotide exchange factor 37	GO:0005089,GO:0005737,GO:0007264,GO:0035023,GO:0043547	Rho guanyl-nucleotide exchange factor activity|cytoplasm|small GTPase mediated signal transduction|regulation of Rho protein signal transduction|positive regulation of GTPase activity
ARHGEF38	1.52856	1.42371	1.40439	2.07738	4.60455	1.93614	0.778826	0.0369425	GeneID:54848,Genbank:XM_011532051.2,HGNC:HGNC:25968	Rho guanine nucleotide exchange factor 38	GO:0005089,GO:0005737,GO:0007264,GO:0035023,GO:0043547	Rho guanyl-nucleotide exchange factor activity|cytoplasm|small GTPase mediated signal transduction|regulation of Rho protein signal transduction|positive regulation of GTPase activity
ARHGEF40	3.65486	4.09552	4.04584	3.10355	4.13972	6.80219	0.25643	0.373473	GeneID:55701,Genbank:XM_017021434.2,HGNC:HGNC:25516,MIM:610018	Rho guanine nucleotide exchange factor 40	GO:0005089,GO:0005737,GO:0035023	Rho guanyl-nucleotide exchange factor activity|cytoplasm|regulation of Rho protein signal transduction
ARHGEF5	4.37836	3.01295	2.06731	2.84846	5.96677	3.86908	0.495558	0.184358	GeneID:7984,Genbank:NM_005435.3,HGNC:HGNC:13209,MIM:600888	Rho guanine nucleotide exchange factor 5	GO:0002102,GO:0002408,GO:0005085,GO:0005089,GO:0005525,GO:0005634,GO:0005654,GO:0005737,GO:0005829,GO:0005886,GO:0007186,GO:0008289,GO:0030036,GO:0030054,GO:0032956,GO:0035023,GO:0035556,GO:0042995,GO:0043065,GO:0043087,GO:0043507,GO:0043547,GO:0051056,GO:0051091,GO:0051493,GO:0051496,GO:0071803,GO:0071944,GO:1904591	podosome|myeloid dendritic cell chemotaxis|guanyl-nucleotide exchange factor activity|Rho guanyl-nucleotide exchange factor activity|GTP binding|nucleus|nucleoplasm|cytoplasm|cytosol|plasma membrane|G-protein coupled receptor signaling pathway|lipid binding|actin cytoskeleton organization|cell junction|regulation of actin cytoskeleton organization|regulation of Rho protein signal transduction|int…
ARHGEF6	9.82303	8.37857	6.76776	8.23392	2.55376	4.09235	-0.95218	0.00670049	GeneID:9459,Genbank:XM_011531413.2,HGNC:HGNC:685,MIM:300267	Rac/Cdc42 guanine nucleotide exchange factor 6	GO:0005085,GO:0005089,GO:0005096,GO:0005829,GO:0006915,GO:0007186,GO:0007254,GO:0030027,GO:0030032,GO:0035023,GO:0043065,GO:0051056	guanyl-nucleotide exchange factor activity|Rho guanyl-nucleotide exchange factor activity|GTPase activator activity|cytosol|apoptotic process|G-protein coupled receptor signaling pathway|JNK cascade|lamellipodium|lamellipodium assembly|regulation of Rho protein signal transduction|positive regulation of apoptotic process|regulation of small GTPase mediated signal transduction	hsa04810,hsa05212	Regulation of actin cytoskeleton|Pancreatic cancer
ARHGEF7	3.44352	2.95144	3.01551	3.36031	3.04679	1.96109	-0.233062	0.451277	GeneID:8874,Genbank:NM_001354046.1,HGNC:HGNC:15607,MIM:605477	Rho guanine nucleotide exchange factor 7	GO:0000322,GO:0001726,GO:0002244,GO:0005085,GO:0005089,GO:0005829,GO:0005886,GO:0005925,GO:0005938,GO:0007030,GO:0007165,GO:0007186,GO:0007399,GO:0010763,GO:0019901,GO:0030027,GO:0030032,GO:0032092,GO:0035023,GO:0035556,GO:0042059,GO:0043005,GO:0043025,GO:0043065,GO:0043234,GO:0043547,GO:0048013,GO:0048041,GO:0051056,GO:0060124,GO:1900026,GO:1904424,GO:2000394	storage vacuole|ruffle|hematopoietic progenitor cell differentiation|guanyl-nucleotide exchange factor activity|Rho guanyl-nucleotide exchange factor activity|cytosol|plasma membrane|focal adhesion|cell cortex|Golgi organization|signal transduction|G-protein coupled receptor signaling pathway|nervous system development|positive regulation of fibroblast migration|protein kinase binding|lamellipodi…	hsa04810	Regulation of actin cytoskeleton
ARHGEF9	0.993775	0.991156	1.2352	0.899187	1.63015	1.28512	0.222464	0.490616	GeneID:23229,Genbank:NM_001353922.1,HGNC:HGNC:14561,MIM:300429	Cdc42 guanine nucleotide exchange factor 9	GO:0005089,GO:0005737,GO:0035023	Rho guanyl-nucleotide exchange factor activity|cytoplasm|regulation of Rho protein signal transduction
ARID1A	11.2367	11.465	10.8872	8.97797	17.4606	14.4043	0.304485	0.298635	GeneID:8289,Genbank:NM_006015.5,HGNC:HGNC:11110,MIM:603024	AT-rich interaction domain 1A	GO:0000122,GO:0000790,GO:0001704,GO:0001843,GO:0003205,GO:0003408,GO:0003677,GO:0003713,GO:0005634,GO:0005654,GO:0006337,GO:0006338,GO:0006344,GO:0006351,GO:0006357,GO:0007566,GO:0016514,GO:0016569,GO:0016922,GO:0019827,GO:0030520,GO:0030521,GO:0030900,GO:0031491,GO:0042766,GO:0042921,GO:0043044,GO:0045893,GO:0048096,GO:0055007,GO:0060674,GO:0071564,GO:0071565,GO:1901998	negative regulation of transcription from RNA polymerase II promoter|nuclear chromatin|formation of primary germ layer|neural tube closure|cardiac chamber development|optic cup formation involved in camera-type eye development|DNA binding|transcription coactivator activity|nucleus|nucleoplasm|nucleosome disassembly|chromatin remodeling|maintenance of chromatin silencing|transcription, DNA-templat…	hsa04714,hsa05225	Thermogenesis|Hepatocellular carcinoma
ARID1B	6.85297	6.36863	5.915	6.21386	5.46301	4.53834	-0.204578	0.440222	GeneID:57492,Genbank:XM_011535984.2,HGNC:HGNC:18040,MIM:614556	AT-rich interaction domain 1B	GO:0002931,GO:0003677,GO:0003713,GO:0005654,GO:0005829,GO:0005886,GO:0006351,GO:0007270,GO:0007399,GO:0016514,GO:0016569,GO:0048096,GO:0060996,GO:0071565,GO:0097026,GO:1904385	response to ischemia|DNA binding|transcription coactivator activity|nucleoplasm|cytosol|plasma membrane|transcription, DNA-templated|neuron-neuron synaptic transmission|nervous system development|SWI/SNF complex|covalent chromatin modification|chromatin-mediated maintenance of transcription|dendritic spine development|nBAF complex|dendritic cell dendrite assembly|cellular response to angiotensin	hsa04714,hsa05225	Thermogenesis|Hepatocellular carcinoma
ARID2	4.69223	4.89216	4.96813	4.76606	4.37619	4.79517	-0.09097	0.719649	GeneID:196528,Genbank:XM_006719272.4,HGNC:HGNC:18037,MIM:609539	AT-rich interaction domain 2	GO:0003007,GO:0003677,GO:0005654,GO:0005886,GO:0006337,GO:0006351,GO:0006355,GO:0008285,GO:0016569,GO:0030336,GO:0042592,GO:0046872,GO:0048568,GO:0060038,GO:0060982	heart morphogenesis|DNA binding|nucleoplasm|plasma membrane|nucleosome disassembly|transcription, DNA-templated|regulation of transcription, DNA-templated|negative regulation of cell proliferation|covalent chromatin modification|negative regulation of cell migration|homeostatic process|metal ion binding|embryonic organ development|cardiac muscle cell proliferation|coronary artery morphogenesis	hsa05225	Hepatocellular carcinoma
ARID3A	1.2175	2.24926	1.78911	1.23152	0.80229	1.42848	-0.494656	0.217662	GeneID:1820,Genbank:XM_017026445.1,HGNC:HGNC:3031,MIM:603265	AT-rich interaction domain 3A	GO:0000977,GO:0001228,GO:0003682,GO:0005634,GO:0005654,GO:0005829,GO:0006977,GO:0042803,GO:0043231,GO:0045121	RNA polymerase II regulatory region sequence-specific DNA binding|transcriptional activator activity, RNA polymerase II transcription regulatory region sequence-specific DNA binding|chromatin binding|nucleus|nucleoplasm|cytosol|DNA damage response, signal transduction by p53 class mediator resulting in cell cycle arrest|protein homodimerization activity|intracellular membrane-bounded organelle|me…
ARID3B	1.51945	2.21162	1.66593	1.60874	1.32076	1.41291	-0.302595	0.387198	GeneID:10620,Genbank:NM_001307939.1,HGNC:HGNC:14350,MIM:612457	AT-rich interaction domain 3B	GO:0000977,GO:0000978,GO:0000980,GO:0001077,GO:0001205,GO:0001228,GO:0003677,GO:0005634,GO:0005654	RNA polymerase II regulatory region sequence-specific DNA binding|RNA polymerase II proximal promoter sequence-specific DNA binding|RNA polymerase II distal enhancer sequence-specific DNA binding|transcriptional activator activity, RNA polymerase II proximal promoter sequence-specific DNA binding|transcriptional activator activity, RNA polymerase II distal enhancer sequence-specific DNA binding|t…
ARID4A	2.93458	3.56761	3.52981	2.83895	3.88023	2.69145	-0.0486071	0.858454	GeneID:5926,Genbank:XM_017021560.1,HGNC:HGNC:9885,MIM:180201	AT-rich interaction domain 4A	GO:0003677,GO:0003700,GO:0004407,GO:0005634,GO:0005654,GO:0005829,GO:0005886,GO:0006349,GO:0006357,GO:0006366,GO:0007283,GO:0017053,GO:0034773,GO:0036124,GO:0044212,GO:0045892,GO:0045944,GO:0048821,GO:0080182,GO:0097368	DNA binding|DNA binding transcription factor activity|histone deacetylase activity|nucleus|nucleoplasm|cytosol|plasma membrane|regulation of gene expression by genetic imprinting|regulation of transcription from RNA polymerase II promoter|transcription from RNA polymerase II promoter|spermatogenesis|transcriptional repressor complex|histone H4-K20 trimethylation|histone H3-K9 trimethylation|trans…
ARID4B	4.95896	5.03411	4.99958	4.58374	5.14202	7.43027	0.140132	0.623848	GeneID:51742,Genbank:XM_011544212.3,HGNC:HGNC:15550,MIM:609696	AT-rich interaction domain 4B	GO:0004407,GO:0005634,GO:0005654,GO:0005737,GO:0006349,GO:0006351,GO:0006357,GO:0007283,GO:0034773,GO:0036124,GO:0044212,GO:0045944,GO:0097368	histone deacetylase activity|nucleus|nucleoplasm|cytoplasm|regulation of gene expression by genetic imprinting|transcription, DNA-templated|regulation of transcription from RNA polymerase II promoter|spermatogenesis|histone H4-K20 trimethylation|histone H3-K9 trimethylation|transcription regulatory region DNA binding|positive regulation of transcription from RNA polymerase II promoter|establishme…
ARID5A	5.77979	6.27192	4.13564	3.4379	1.81305	1.78221	-1.30852	0.000122294	GeneID:10865,Genbank:NM_001319085.1,HGNC:HGNC:17361,MIM:611583	AT-rich interaction domain 5A	GO:0000122,GO:0001227,GO:0003677,GO:0003714,GO:0003723,GO:0005634,GO:0005654,GO:0005730,GO:0006351,GO:0008134,GO:0030331,GO:0043565,GO:0044212,GO:0045087,GO:0045892,GO:0046965,GO:0046966,GO:0050681,GO:0071391	negative regulation of transcription from RNA polymerase II promoter|transcriptional repressor activity, RNA polymerase II transcription regulatory region sequence-specific DNA binding|DNA binding|transcription corepressor activity|RNA binding|nucleus|nucleoplasm|nucleolus|transcription, DNA-templated|transcription factor binding|estrogen receptor binding|sequence-specific DNA binding|transcripti…
ARID5B	6.72489	6.30346	8.01676	6.66262	5.08988	7.00364	-0.15395	0.546271	GeneID:84159,Genbank:NM_032199.2,HGNC:HGNC:17362,MIM:608538	AT-rich interaction domain 5B	GO:0000122,GO:0000977,GO:0001227,GO:0001822,GO:0001889,GO:0003677,GO:0003713,GO:0005634,GO:0005654,GO:0006351,GO:0008584,GO:0008585,GO:0009791,GO:0010761,GO:0030325,GO:0032452,GO:0035264,GO:0044212,GO:0045444,GO:0045892,GO:0048008,GO:0048468,GO:0048644,GO:0048705,GO:0051091,GO:0060021,GO:0060325,GO:0060612,GO:0060613,GO:1990830	negative regulation of transcription from RNA polymerase II promoter|RNA polymerase II regulatory region sequence-specific DNA binding|transcriptional repressor activity, RNA polymerase II transcription regulatory region sequence-specific DNA binding|kidney development|liver development|DNA binding|transcription coactivator activity|nucleus|nucleoplasm|transcription, DNA-templated|male gonad deve…
ARIH1	12.5442	12.7326	11.4448	13.0772	15.3461	14.1155	0.173566	0.49845	GeneID:25820,Genbank:NM_005744.3,HGNC:HGNC:689,MIM:605624	ariadne RBR E3 ubiquitin protein ligase 1	GO:0000151,GO:0000209,GO:0004842,GO:0005737,GO:0005829,GO:0006511,GO:0008270,GO:0015030,GO:0016567,GO:0016604,GO:0019787,GO:0031624,GO:0031625,GO:0032436,GO:0042787,GO:0061630,GO:0097413	ubiquitin ligase complex|protein polyubiquitination|ubiquitin-protein transferase activity|cytoplasm|cytosol|ubiquitin-dependent protein catabolic process|zinc ion binding|Cajal body|protein ubiquitination|nuclear body|ubiquitin-like protein transferase activity|ubiquitin conjugating enzyme binding|ubiquitin protein ligase binding|positive regulation of proteasomal ubiquitin-dependent protein cat…
ARIH2	5.01542	4.56524	4.35733	4.51169	3.71103	4.03208	-0.185481	0.464331	GeneID:10425,Genbank:NM_001349210.1,HGNC:HGNC:690,MIM:605615	ariadne RBR E3 ubiquitin protein ligase 2	GO:0000209,GO:0004842,GO:0005634,GO:0005654,GO:0005737,GO:0007275,GO:0008270,GO:0016567,GO:0031624,GO:0032436,GO:0042787,GO:0048588,GO:0061630,GO:0070534,GO:0070936,GO:0071425,GO:1903955	protein polyubiquitination|ubiquitin-protein transferase activity|nucleus|nucleoplasm|cytoplasm|multicellular organism development|zinc ion binding|protein ubiquitination|ubiquitin conjugating enzyme binding|positive regulation of proteasomal ubiquitin-dependent protein catabolic process|protein ubiquitination involved in ubiquitin-dependent protein catabolic process|developmental cell growth|ubi…
ARL1	14.435	11.9739	12.0576	13.729	12.6021	18.6984	0.16998	0.56573	GeneID:400,Genbank:NM_001301068.1,HGNC:HGNC:692,MIM:603425	ADP ribosylation factor like GTPase 1	GO:0003924,GO:0005525,GO:0005737,GO:0005794,GO:0005802,GO:0005829,GO:0007030,GO:0007264,GO:0008047,GO:0009404,GO:0019904,GO:0031584,GO:0032588,GO:0034067,GO:0042147,GO:0046872,GO:0048193,GO:0070062	GTPase activity|GTP binding|cytoplasm|Golgi apparatus|trans-Golgi network|cytosol|Golgi organization|small GTPase mediated signal transduction|enzyme activator activity|toxin metabolic process|protein domain specific binding|activation of phospholipase D activity|trans-Golgi network membrane|protein localization to Golgi apparatus|retrograde transport, endosome to Golgi|metal ion binding|Golgi ve…
ARL11	0.835222	0.96127	0.736788	1.28105	0.262846	0.871918	-0.37614	0.492737	GeneID:115761,Genbank:NM_138450.5,HGNC:HGNC:24046,MIM:609351	ADP ribosylation factor like GTPase 11	GO:0005525,GO:0005622,GO:0007264	GTP binding|intracellular|small GTPase mediated signal transduction
ARL13B	3.33829	2.36293	2.25056	2.40429	1.83322	2.84611	-0.245563	0.462452	GeneID:200894,Genbank:NM_001174150.1,HGNC:HGNC:25419,MIM:608922	ADP ribosylation factor like GTPase 13B	GO:0001947,GO:0005525,GO:0005929,GO:0005930,GO:0007224,GO:0007264,GO:0009953,GO:0010226,GO:0021532,GO:0021830,GO:0021943,GO:0031514,GO:0060170,GO:0060271,GO:0070986,GO:1905515	heart looping|GTP binding|cilium|axoneme|smoothened signaling pathway|small GTPase mediated signal transduction|dorsal/ventral pattern formation|response to lithium ion|neural tube patterning|interneuron migration from the subpallium to the cortex|formation of radial glial scaffolds|motile cilium|ciliary membrane|cilium assembly|left/right axis specification|non-motile cilium assembly
ARL14EP	3.84105	3.66136	3.83756	3.54802	4.1139	3.84309	-0.025424	0.929936	GeneID:120534,Genbank:NM_152316.2,HGNC:HGNC:26798,MIM:612295	ADP ribosylation factor like GTPase 14 effector protein	GO:0005634,GO:0005730,GO:0005829,GO:0005886,GO:0005925,GO:0043231	nucleus|nucleolus|cytosol|plasma membrane|focal adhesion|intracellular membrane-bounded organelle
ARL15	4.49405	4.83623	4.00654	4.35745	3.83529	3.407	-0.273818	0.326806	GeneID:54622,Genbank:XM_011543500.2,HGNC:HGNC:25945	ADP ribosylation factor like GTPase 15	GO:0005525,GO:0005622,GO:0007264,GO:0070062	GTP binding|intracellular|small GTPase mediated signal transduction|extracellular exosome
ARL16	4.50048	3.04146	3.519	4.87774	4.12371	3.95408	0.277851	0.361946	GeneID:339231,Genbank:NM_001040025.2,HGNC:HGNC:27902	ADP ribosylation factor like GTPase 16	GO:0005525,GO:0005622,GO:0007264	GTP binding|intracellular|small GTPase mediated signal transduction
[truncated: 12,065 more rows]

## Sheet: Supplementary Table 2D
gene_name	P1_FPKM	P2_FPKM	P3_FPKM	Ca1_FPKM	Ca2_FPKM	Ca3_FPKM	log2FoldChange	pvalue	gene_biotype	description
[truncated: 14,581 more rows]

[truncated: 2 more sheets: Supplementary Table 2E, Supplementary Table 2F]
