# Supplementary material for: Integrated multi-omics analysis for lung adenocarcinoma in Xuanwei, China
Source: Aging (Albany NY). 2023 Dec 13;15(23):14263–91. doi: 10.18632/aging.205300 (PMC10756121; doi:10.18632/aging.205300)
Supplement: Supplementary Table 3 [file aging-15-205300-s004.xlsx]

## Sheet: Sheet1
Supplementary Table 3. Proteomic profiles of six samples.
Sheet	Description
Supplementary Table 3A	A list of protein groups and their relative intensities in LUAD and non-tumor samples.
Supplementary Table 3B	High quality proteins obtained after filtering.

## Sheet: Supplementary Table 3A
Accession	Description	Coverage [%]	# Peptides	# PSMs	# Unique Peptides	# AAs	MW [kDa]	calc. pI	Score Sequest HT: Sequest HT	Ca1	Ca2	Ca3	P1	P2	P3
Q09666	Neuroblast differentiation-associated protein AHNAK OS=Homo sapiens OX=9606 GN=AHNAK PE=1 SV=2	68	257	726	256	5890	628.7	6.15	1196.36	124.9	120.5	76.1	107.4	72.8	98.4
P21333	Filamin-A OS=Homo sapiens OX=9606 GN=FLNA PE=1 SV=4	55	121	449	107	2647	280.6	6.06	908.76	113.6	102.8	94.5	99.9	92.9	96.4
Q15149	Plectin OS=Homo sapiens OX=9606 GN=PLEC PE=1 SV=3	42	195	343	187	4684	531.5	5.96	586.61	119	105.9	90.3	101.8	92.2	90.8
P35579	Myosin-9 OS=Homo sapiens OX=9606 GN=MYH9 PE=1 SV=4	53	116	413	93	1960	226.4	5.6	767.34	108	99.3	104.1	97.7	99.2	91.7
P02768	Serum albumin OS=Homo sapiens OX=9606 GN=ALB PE=1 SV=2	82	60	2275	60	609	69.3	6.28	4299.65	98.5	107.5	63.9	114.5	77.9	137.7
Q13813	Spectrin alpha chain, non-erythrocytic 1 OS=Homo sapiens OX=9606 GN=SPTAN1 PE=1 SV=3	56	127	275	127	2472	284.4	5.35	522.86	119.1	118	75.8	105.5	83.4	98.3
Q9Y490	Talin-1 OS=Homo sapiens OX=9606 GN=TLN1 PE=1 SV=3	54	112	245	99	2541	269.6	6.07	451.77	112.5	109.4	85.1	104.8	90.7	97.6
Q01082	Spectrin beta chain, non-erythrocytic 1 OS=Homo sapiens OX=9606 GN=SPTBN1 PE=1 SV=2	50	114	236	108	2364	274.4	5.57	402.38	116	116.6	75.2	108.2	82	102
P12111	Collagen alpha-3(VI) chain OS=Homo sapiens OX=9606 GN=COL6A3 PE=1 SV=5	33	98	314	98	3177	343.5	6.68	615.32	115.9	113.6	77.3	93.9	69.1	130.2
P35749	Myosin-11 OS=Homo sapiens OX=9606 GN=MYH11 PE=1 SV=3	46	97	260	75	1972	227.2	5.5	473.3	122.9	122.9	78.3	101.2	81.2	93.5
P35580	Myosin-10 OS=Homo sapiens OX=9606 GN=MYH10 PE=1 SV=3	48	100	235	76	1976	228.9	5.54	408.32	109.3	103.3	89.2	96.9	108	93.3
P01024	Complement C3 OS=Homo sapiens OX=9606 GN=C3 PE=1 SV=2	49	76	264	76	1663	187	6.4	445.95	86.7	115.5	68.4	119.8	74.6	135.1
O75369	Filamin-B OS=Homo sapiens OX=9606 GN=FLNB PE=1 SV=2	42	93	192	81	2602	278	5.73	329.46	97.6	91.7	109.9	81.4	138.7	80.8
Q14204	Cytoplasmic dynein 1 heavy chain 1 OS=Homo sapiens OX=9606 GN=DYNC1H1 PE=1 SV=5	27	115	171	115	4646	532.1	6.4	285.22	105.8	101.6	103.1	99.7	94.9	94.8
P04114	Apolipoprotein B-100 OS=Homo sapiens OX=9606 GN=APOB PE=1 SV=2	25	108	172	108	4563	515.3	7.05	283.85	86.2	132.4	71.2	135.7	64.5	109.9
P98160	Basement membrane-specific heparan sulfate proteoglycan core protein OS=Homo sapiens OX=9606 GN=HSPG2 PE=1 SV=4	24	78	178	78	4391	468.5	6.51	328.83	118.8	103.2	109.8	92.7	78.5	97
P11277	Spectrin beta chain, erythrocytic OS=Homo sapiens OX=9606 GN=SPTB PE=1 SV=5	45	86	146	80	2137	246.3	5.27	264.45	83.4	127.1	71.2	131.9	66.6	119.8
O43707	Alpha-actinin-4 OS=Homo sapiens OX=9606 GN=ACTN4 PE=1 SV=2	60	55	202	39	911	104.8	5.44	360.39	114.7	102.7	93.7	96.8	102.6	89.5
Q9UPN3	Microtubule-actin cross-linking factor 1, isoforms 1/2/3/5 OS=Homo sapiens OX=9606 GN=MACF1 PE=1 SV=4	18	117	139	112	7388	837.8	5.39	195.92	108.4	109	102.1	100.6	86.6	93.2
P02787	Serotransferrin OS=Homo sapiens OX=9606 GN=TF PE=1 SV=3	60	47	280	47	698	77	7.12	571.55	101.9	116.7	63	110	74.8	133.6
P35555	Fibrillin-1 OS=Homo sapiens OX=9606 GN=FBN1 PE=1 SV=4	31	70	152	68	2871	312.1	4.93	209.1	119.2	80.2	115.9	76.4	100.5	107.7
P46940	Ras GTPase-activating-like protein IQGAP1 OS=Homo sapiens OX=9606 GN=IQGAP1 PE=1 SV=1	38	61	138	61	1657	189.1	6.48	249.44	102.6	92	119.5	93.3	103	89.7
P02549	Spectrin alpha chain, erythrocytic 1 OS=Homo sapiens OX=9606 GN=SPTA1 PE=1 SV=5	39	82	144	82	2419	279.8	5.05	226.2	80.1	126.2	69.2	136.9	63.9	123.7
P18206	Vinculin OS=Homo sapiens OX=9606 GN=VCL PE=1 SV=4	58	63	165	63	1134	123.7	5.66	302.68	116.8	110.8	84.6	105.4	87.1	95.3
P02751	Fibronectin OS=Homo sapiens OX=9606 GN=FN1 PE=1 SV=5	29	56	143	56	2477	272.2	5.5	279.42	101.1	96.8	126.4	99.4	72.6	103.9
P02545	Prelamin-A/C OS=Homo sapiens OX=9606 GN=LMNA PE=1 SV=1	66	46	217	45	664	74.1	7.02	435.89	98.3	81.6	115.8	73.9	149.2	81.3
P08670	Vimentin OS=Homo sapiens OX=9606 GN=VIM PE=1 SV=4	62	41	290	35	466	53.6	5.12	538.88	116.1	94	102.1	95.8	95	97
P01023	Alpha-2-macroglobulin OS=Homo sapiens OX=9606 GN=A2M PE=1 SV=3	42	51	161	47	1474	163.2	6.46	281.58	77.4	113.2	64.5	127.6	66.8	150.5
Q00610	Clathrin heavy chain 1 OS=Homo sapiens OX=9606 GN=CLTC PE=1 SV=5	36	52	136	52	1675	191.5	5.69	244.76	100.7	92.3	106.3	95.1	113.1	92.5
Q7Z406	Myosin-14 OS=Homo sapiens OX=9606 GN=MYH14 PE=1 SV=2	32	56	123	46	1995	227.7	5.6	221.87	113.4	117.1	83.3	100.8	97.3	88.1
P60709	Actin, cytoplasmic 1 OS=Homo sapiens OX=9606 GN=ACTB PE=1 SV=1	61	21	776	7	375	41.7	5.48	1357.52	105.9	92.7	100.7	95.9	112	92.8
P69905	Hemoglobin subunit alpha OS=Homo sapiens OX=9606 GN=HBA1 PE=1 SV=2	68	12	953	11	142	15.2	8.68	2240.43	74.5	124.1	55.8	155.8	51.4	138.3
O60437	Periplakin OS=Homo sapiens OX=9606 GN=PPL PE=1 SV=4	42	71	104	71	1756	204.6	5.6	174.09	108.4	99.2	108.4	93.6	102.2	88.2
Q9P2E9	Ribosome-binding protein 1 OS=Homo sapiens OX=9606 GN=RRBP1 PE=1 SV=5	57	60	114	60	1410	152.4	8.6	177.34	106.1	80.5	118.6	81.5	124.6	88.7
P11021	Endoplasmic reticulum chaperone BiP OS=Homo sapiens OX=9606 GN=HSPA5 PE=1 SV=2	52	35	148	32	654	72.3	5.16	314.16	87.1	74.3	140.2	81	136.1	81.2
P12814	Alpha-actinin-1 OS=Homo sapiens OX=9606 GN=ACTN1 PE=1 SV=2	48	40	145	23	892	103	5.41	238.86	108.7	101.5	96.3	101.2	94.2	98.1
P07900	Heat shock protein HSP 90-alpha OS=Homo sapiens OX=9606 GN=HSP90AA1 PE=1 SV=5	45	34	126	22	732	84.6	5.02	245.19	98.4	89.1	127.6	91.5	106.2	87.2
P0C0L5	Complement C4-B OS=Homo sapiens OX=9606 GN=C4B PE=1 SV=2	31	49	110	2	1744	192.6	7.27	203.24	65.3	79.1	89.5	140.1	75.5	150.6
P68871	Hemoglobin subunit beta OS=Homo sapiens OX=9606 GN=HBB PE=1 SV=2	96	17	1642	10	147	16	7.28	3445.62	68.3	135.1	52.1	154.2	48.9	141.5
P02675	Fibrinogen beta chain OS=Homo sapiens OX=9606 GN=FGB PE=1 SV=2	64	24	125	24	491	55.9	8.27	261.95	79.9	99.5	100.2	123.3	63.8	133.3
P0C0L4	Complement C4-A OS=Homo sapiens OX=9606 GN=C4A PE=1 SV=2	31	49	108	2	1744	192.7	7.08	198.61	86.2	117.9	75.8	131.1	65.1	123.9
P08238	Heat shock protein HSP 90-beta OS=Homo sapiens OX=9606 GN=HSP90AB1 PE=1 SV=4	48	37	135	24	724	83.2	5.03	253.87	92.5	77.8	133.2	82.1	134	80.4
P00738	Haptoglobin OS=Homo sapiens OX=9606 GN=HP PE=1 SV=1	56	27	166	13	406	45.2	6.58	333.81	67	92.6	63.4	133.8	70	173.1
P22105	Tenascin-X OS=Homo sapiens OX=9606 GN=TNXB PE=1 SV=5	25	69	89	69	4244	458.1	5.17	128.23	106.3	107.2	87.3	105.6	79.5	114.1
P26038	Moesin OS=Homo sapiens OX=9606 GN=MSN PE=1 SV=3	50	42	160	31	577	67.8	6.4	292.47	97.6	93.7	100.2	90.9	133.8	83.9
P55268	Laminin subunit beta-2 OS=Homo sapiens OX=9606 GN=LAMB2 PE=1 SV=2	32	48	90	48	1798	195.9	6.52	162.05	142.2	131.8	68	106.3	62.5	89.3
P11142	Heat shock cognate 71 kDa protein OS=Homo sapiens OX=9606 GN=HSPA8 PE=1 SV=1	55	36	155	25	646	70.9	5.52	283.5	96.7	86.8	126.5	88.3	115.2	86.5
P62736	Actin, aortic smooth muscle OS=Homo sapiens OX=9606 GN=ACTA2 PE=1 SV=1	55	20	607	3	377	42	5.39	889.61	111.7	97	96.9	95.9	107.7	90.8
P02671	Fibrinogen alpha chain OS=Homo sapiens OX=9606 GN=FGA PE=1 SV=2	36	33	138	33	866	94.9	6.01	249.7	76.9	103.4	89.6	127.5	62.4	140.1
P14618	Pyruvate kinase PKM OS=Homo sapiens OX=9606 GN=PKM PE=1 SV=4	64	29	122	29	531	57.9	7.84	204	114.6	82.6	118	85.7	114.1	85
P07355	Annexin A2 OS=Homo sapiens OX=9606 GN=ANXA2 PE=1 SV=2	67	28	217	28	339	38.6	7.75	439.06	135.1	118	74.7	108.7	68.2	95.3
P08133	Annexin A6 OS=Homo sapiens OX=9606 GN=ANXA6 PE=1 SV=3	59	40	104	40	673	75.8	5.6	201.5	106	105.2	91	105.8	90.4	101.6
Q13228	Methanethiol oxidase OS=Homo sapiens OX=9606 GN=SELENBP1 PE=1 SV=2	55	24	104	24	472	52.4	6.37	228.47	85	89.5	99.8	83.3	162.3	80
P00558	Phosphoglycerate kinase 1 OS=Homo sapiens OX=9606 GN=PGK1 PE=1 SV=3	75	31	134	26	417	44.6	8.1	241.29	98.5	88.7	130	92.6	103.9	86.3
Q9NZM1	Myoferlin OS=Homo sapiens OX=9606 GN=MYOF PE=1 SV=1	31	54	77	53	2061	234.6	6.18	117.73	107.6	90.4	93.1	85.1	132.9	91
P11047	Laminin subunit gamma-1 OS=Homo sapiens OX=9606 GN=LAMC1 PE=1 SV=3	33	47	87	47	1609	177.5	5.12	144.94	151.2	127.5	64.9	105.2	63.7	87.5
P29401	Transketolase OS=Homo sapiens OX=9606 GN=TKT PE=1 SV=3	52	32	107	32	623	67.8	7.66	202.16	87.8	74.8	134.3	72.3	149.4	81.3
P16157	Ankyrin-1 OS=Homo sapiens OX=9606 GN=ANK1 PE=1 SV=3	28	42	74	40	1881	206.1	6.01	137.44	85.5	126.7	68.4	133.7	63.9	121.7
P12109	Collagen alpha-1(VI) chain OS=Homo sapiens OX=9606 GN=COL6A1 PE=1 SV=3	27	27	123	27	1028	108.5	5.43	238.67	122.7	114.8	71	100.3	61.2	130.1
Q92817	Envoplakin OS=Homo sapiens OX=9606 GN=EVPL PE=1 SV=3	32	59	69	59	2033	231.5	6.96	123.95	109.9	104.5	111.4	88.7	103.5	82.1
P46939	Utrophin OS=Homo sapiens OX=9606 GN=UTRN PE=1 SV=2	19	63	79	62	3433	394.2	5.33	126.02	114.9	115.4	88	102.5	82.8	96.3
P08729	Keratin, type II cytoskeletal 7 OS=Homo sapiens OX=9606 GN=KRT7 PE=1 SV=5	53	31	150	23	469	51.4	5.48	267.71	80.2	69.1	126.6	55.9	197.6	70.6
O15230	Laminin subunit alpha-5 OS=Homo sapiens OX=9606 GN=LAMA5 PE=1 SV=8	15	44	78	43	3695	399.5	7.02	137.78	137.1	123.4	73.8	105.3	71.6	88.7
P0DMV9	Heat shock 70 kDa protein 1B OS=Homo sapiens OX=9606 GN=HSPA1B PE=1 SV=1	48	30	125	17	641	70	5.66	230.04	91.6	90.4	132.9	85.4	117.4	82.3
P05787	Keratin, type II cytoskeletal 8 OS=Homo sapiens OX=9606 GN=KRT8 PE=1 SV=7	55	35	140	28	483	53.7	5.59	243.09	104.6	75.6	119	59.8	162.4	78.5
P07237	Protein disulfide-isomerase OS=Homo sapiens OX=9606 GN=P4HB PE=1 SV=3	49	29	105	29	508	57.1	4.87	194.86	86.3	68.4	141.5	73.1	154.4	76.3
P78527	DNA-dependent protein kinase catalytic subunit OS=Homo sapiens OX=9606 GN=PRKDC PE=1 SV=3	18	66	89	66	4128	468.8	7.12	99.58	93	93.5	127.3	84.7	115.9	85.6
Q14764	Major vault protein OS=Homo sapiens OX=9606 GN=MVP PE=1 SV=4	44	34	96	34	893	99.3	5.48	163.71	85.9	78	78.7	75.7	202.9	78.8
P22314	Ubiquitin-like modifier-activating enzyme 1 OS=Homo sapiens OX=9606 GN=UBA1 PE=1 SV=3	37	34	79	34	1058	117.8	5.76	153.65	98.2	94.6	121.3	91.3	105.8	88.7
P68133	Actin, alpha skeletal muscle OS=Homo sapiens OX=9606 GN=ACTA1 PE=1 SV=1	55	19	593	1	377	42	5.39	855.6	147.5	120.2	63.6	115	64.4	89.3
P02042	Hemoglobin subunit delta OS=Homo sapiens OX=9606 GN=HBD PE=1 SV=2	82	13	807	6	147	16	8.05	1481.96	77.3	130.2	62.8	142.8	58.5	128.4
P13667	Protein disulfide-isomerase A4 OS=Homo sapiens OX=9606 GN=PDIA4 PE=1 SV=2	49	33	86	33	645	72.9	5.07	145.32	77.3	78	147.5	73.2	147.7	76.2
Q16555	Dihydropyrimidinase-related protein 2 OS=Homo sapiens OX=9606 GN=DPYSL2 PE=1 SV=1	53	22	92	19	572	62.3	6.38	187.71	106.8	99	106.2	101.8	96.3	90
Q16787	Laminin subunit alpha-3 OS=Homo sapiens OX=9606 GN=LAMA3 PE=1 SV=2	20	54	72	53	3333	366.4	7.24	89.03	151.1	126.8	63.9	107.8	55.5	94.9
P28838	Cytosol aminopeptidase OS=Homo sapiens OX=9606 GN=LAP3 PE=1 SV=3	59	26	69	26	519	56.1	7.93	142.75	107	97.8	106.5	107.5	88	93.3
P00352	Retinal dehydrogenase 1 OS=Homo sapiens OX=9606 GN=ALDH1A1 PE=1 SV=2	53	24	73	21	501	54.8	6.73	153.39	104.9	101.1	103.6	119.9	70.2	100.4
P21980	Protein-glutamine gamma-glutamyltransferase 2 OS=Homo sapiens OX=9606 GN=TGM2 PE=1 SV=2	41	28	101	28	687	77.3	5.22	159.26	108.9	101.7	84.6	107.4	92.2	105.2
P13796	Plastin-2 OS=Homo sapiens OX=9606 GN=LCP1 PE=1 SV=6	50	26	78	22	627	70.2	5.43	138.29	109.4	97.6	91.2	109.9	95.3	96.7
Q05707	Collagen alpha-1(XIV) chain OS=Homo sapiens OX=9606 GN=COL14A1 PE=1 SV=3	26	40	78	40	1796	193.4	5.3	137.8	80.4	81.6	71.5	90.8	104.8	170.8
P04406	Glyceraldehyde-3-phosphate dehydrogenase OS=Homo sapiens OX=9606 GN=GAPDH PE=1 SV=3	56	18	138	18	335	36	8.46	256.65	101.7	94.5	95.6	97.1	115.4	95.7
P06733	Alpha-enolase OS=Homo sapiens OX=9606 GN=ENO1 PE=1 SV=2	54	26	153	24	434	47.1	7.39	263.92	80.5	70.8	186.8	71.5	116.7	73.7
P14625	Endoplasmin OS=Homo sapiens OX=9606 GN=HSP90B1 PE=1 SV=1	39	32	99	30	803	92.4	4.84	164.41	95.4	77.4	120.6	85.5	131.2	89.8
Q86UP2	Kinectin OS=Homo sapiens OX=9606 GN=KTN1 PE=1 SV=1	36	47	60	47	1357	156.2	5.64	106.87	100.3	89.1	131.9	87.1	109.4	82.2
P04040	Catalase OS=Homo sapiens OX=9606 GN=CAT PE=1 SV=3	54	27	80	27	527	59.7	7.39	150.62	90	126	64.4	113.4	85.5	120.8
P00450	Ceruloplasmin OS=Homo sapiens OX=9606 GN=CP PE=1 SV=1	32	29	80	29	1065	122.1	5.72	166.51	86.3	114.8	65.4	115.5	74.2	143.8
O00468	Agrin OS=Homo sapiens OX=9606 GN=AGRN PE=1 SV=6	25	38	59	38	2068	217.2	6.39	96.51	137.7	108.7	87.3	102.2	74.3	89.7
P06396	Gelsolin OS=Homo sapiens OX=9606 GN=GSN PE=1 SV=1	42	30	90	30	782	85.6	6.28	158.05	119.1	97.4	90.5	88	99.1	106
O00159	Unconventional myosin-Ic OS=Homo sapiens OX=9606 GN=MYO1C PE=1 SV=4	36	34	65	34	1063	121.6	9.41	115.66	131.4	125.8	60.5	117.5	73.3	91.6
P24821	Tenascin OS=Homo sapiens OX=9606 GN=TNC PE=1 SV=3	19	37	61	37	2201	240.7	4.89	110.14	119.5	87.8	149.4	69.5	98	75.7
P55072	Transitional endoplasmic reticulum ATPase OS=Homo sapiens OX=9606 GN=VCP PE=1 SV=4	41	30	57	30	806	89.3	5.26	121.55	101.9	97.5	97.2	96.7	109.1	97.6
Q14980	Nuclear mitotic apparatus protein 1 OS=Homo sapiens OX=9606 GN=NUMA1 PE=1 SV=2	26	50	65	49	2115	238.1	5.78	95.28	96.2	93.7	121.3	91.6	109.1	88
P08727	Keratin, type I cytoskeletal 19 OS=Homo sapiens OX=9606 GN=KRT19 PE=1 SV=4	69	31	114	21	400	44.1	5.14	201.06	98.6	83.8	115.4	67.8	153.1	81.3
Q99715	Collagen alpha-1(XII) chain OS=Homo sapiens OX=9606 GN=COL12A1 PE=1 SV=2	17	43	58	43	3063	332.9	5.53	94.22	136	132	67.5	110.9	58	95.6
P02647	Apolipoprotein A-I OS=Homo sapiens OX=9606 GN=APOA1 PE=1 SV=1	75	25	154	25	267	30.8	5.76	274.93	79.3	108.7	63.3	137.7	63.4	147.5
P15311	Ezrin OS=Homo sapiens OX=9606 GN=EZR PE=1 SV=4	44	33	91	23	586	69.4	6.27	174.25	126.8	107.9	99.4	90.2	86.4	89.3
P12110	Collagen alpha-2(VI) chain OS=Homo sapiens OX=9606 GN=COL6A2 PE=1 SV=4	23	23	91	23	1019	108.5	6.21	172.41	108.3	98.7	86.2	102.3	72.3	132.3
P01857	Immunoglobulin heavy constant gamma 1 OS=Homo sapiens OX=9606 GN=IGHG1 PE=1 SV=1	54	14	290	8	330	36.1	8.19	568.4	82.1	107.1	59.3	110.1	85.5	155.9
P35221	Catenin alpha-1 OS=Homo sapiens OX=9606 GN=CTNNA1 PE=1 SV=1	44	33	59	33	906	100	6.29	125.02	104.7	105.2	111.2	97.7	90.5	90.7
P01876	Immunoglobulin heavy constant alpha 1 OS=Homo sapiens OX=9606 GN=IGHA1 PE=1 SV=2	54	13	92	8	353	37.6	6.51	240.87	88.9	103	72.1	119.7	84.5	131.7
P13639	Elongation factor 2 OS=Homo sapiens OX=9606 GN=EEF2 PE=1 SV=4	34	28	67	27	858	95.3	6.83	131.23	99.7	87.8	110.4	87.3	125.2	89.6
P04083	Annexin A1 OS=Homo sapiens OX=9606 GN=ANXA1 PE=1 SV=2	65	22	84	22	346	38.7	7.02	157.07	113.6	101.7	99.1	93.2	101.5	91
Q9BQE3	Tubulin alpha-1C chain OS=Homo sapiens OX=9606 GN=TUBA1C PE=1 SV=1	46	20	93	6	449	49.9	5.1	207.03	105	97.7	110.5	89.6	109.4	87.8
P09960	Leukotriene A-4 hydrolase OS=Homo sapiens OX=9606 GN=LTA4H PE=1 SV=2	52	26	62	26	611	69.2	6.18	116.81	103	86.6	91.4	92.5	133.2	93.3
P68104	Elongation factor 1-alpha 1 OS=Homo sapiens OX=9606 GN=EEF1A1 PE=1 SV=1	42	18	98	18	462	50.1	9.01	217.57	102.9	81	118.7	84.1	129.7	83.6
P02679	Fibrinogen gamma chain OS=Homo sapiens OX=9606 GN=FGG PE=1 SV=3	50	21	78	21	453	51.5	5.62	151.82	76.5	96.9	98.5	126.7	62.9	138.5
P68366	Tubulin alpha-4A chain OS=Homo sapiens OX=9606 GN=TUBA4A PE=1 SV=1	47	20	80	6	448	49.9	5.06	179.96	89.1	107.7	103.6	104.8	95.1	99.8
P07437	Tubulin beta chain OS=Homo sapiens OX=9606 GN=TUBB PE=1 SV=2	54	17	132	4	444	49.6	4.89	234.64	90.5	99.2	111.7	107.8	94.9	95.9
P13797	Plastin-3 OS=Homo sapiens OX=9606 GN=PLS3 PE=1 SV=4	45	26	68	21	630	70.8	5.6	124.1	107.3	101.5	100	102.9	91.2	97.1
P05783	Keratin, type I cytoskeletal 18 OS=Homo sapiens OX=9606 GN=KRT18 PE=1 SV=2	52	26	91	24	430	48	5.45	161.15	89.3	69.7	128.5	55.2	183.9	73.4
Q9HBL0	Tensin-1 OS=Homo sapiens OX=9606 GN=TNS1 PE=1 SV=2	29	39	61	36	1735	185.6	7.75	94.53	116.7	116	81.5	108.9	79.6	97.3
P08603	Complement factor H OS=Homo sapiens OX=9606 GN=CFH PE=1 SV=4	32	31	58	28	1231	139	6.61	99.74	90	105	80	118	78.6	128.4
Q15746	Myosin light chain kinase, smooth muscle OS=Homo sapiens OX=9606 GN=MYLK PE=1 SV=4	21	33	53	33	1914	210.6	6.15	93.01	109.9	107.5	88.1	101.9	90.1	102.5
P30101	Protein disulfide-isomerase A3 OS=Homo sapiens OX=9606 GN=PDIA3 PE=1 SV=4	46	24	81	24	505	56.7	6.35	162.03	93.5	76.5	139.4	77.2	136.6	76.9
P05091	Aldehyde dehydrogenase, mitochondrial OS=Homo sapiens OX=9606 GN=ALDH2 PE=1 SV=2	45	20	53	17	517	56.3	7.05	107.75	74.8	75.1	137.7	100.2	119.2	93
P09467	Fructose-1,6-bisphosphatase 1 OS=Homo sapiens OX=9606 GN=FBP1 PE=1 SV=5	54	19	60	17	338	36.8	6.99	112.54	103.6	78.6	109.8	88.7	134.9	84.4
P07814	Bifunctional glutamate/proline--tRNA ligase OS=Homo sapiens OX=9606 GN=EPRS PE=1 SV=5	27	32	47	32	1512	170.5	7.33	78.22	89.6	84.4	125.5	87.8	124.3	88.4
P50395	Rab GDP dissociation inhibitor beta OS=Homo sapiens OX=9606 GN=GDI2 PE=1 SV=2	58	25	52	18	445	50.6	6.47	107.22	96.7	98	106.9	97.3	107.6	93.5
A6NMZ7	Collagen alpha-6(VI) chain OS=Homo sapiens OX=9606 GN=COL6A6 PE=1 SV=2	15	34	56	32	2263	247	6.89	106.25	118.5	115.5	71.7	132	60.4	101.9
P04275	von Willebrand factor OS=Homo sapiens OX=9606 GN=VWF PE=1 SV=4	18	41	49	41	2813	309.1	5.48	71.45	122.4	109.4	80.1	95	85.1	108.1
P02730	Band 3 anion transport protein OS=Homo sapiens OX=9606 GN=SLC4A1 PE=1 SV=3	21	17	66	17	911	101.7	5.19	157.9	82	127	65.6	139.8	58.3	127.3
P27797	Calreticulin OS=Homo sapiens OX=9606 GN=CALR PE=1 SV=1	47	19	75	19	417	48.1	4.44	107.57	89.5	69.9	124.9	79.9	151.5	84.3
P05023	Sodium/potassium-transporting ATPase subunit alpha-1 OS=Homo sapiens OX=9606 GN=ATP1A1 PE=1 SV=1	32	30	54	30	1023	112.8	5.49	84.69	94.5	97.7	107.2	93.6	120.6	86.4
P04075	Fructose-bisphosphate aldolase A OS=Homo sapiens OX=9606 GN=ALDOA PE=1 SV=2	51	21	79	17	364	39.4	8.09	151.88	100	85.8	106.4	85.1	134.7	88
P49327	Fatty acid synthase OS=Homo sapiens OX=9606 GN=FASN PE=1 SV=3	19	37	56	37	2511	273.3	6.44	82.67	114.9	112.3	86.6	100.6	88.6	97
P60174	Triosephosphate isomerase OS=Homo sapiens OX=9606 GN=TPI1 PE=1 SV=3	57	14	67	14	286	30.8	5.92	160.33	97.3	88.5	113.9	84.4	129.5	86.4
Q14315	Filamin-C OS=Homo sapiens OX=9606 GN=FLNC PE=1 SV=3	13	33	63	17	2725	290.8	5.97	94.54	119.6	120.3	78	102.2	80.5	99.4
P35241	Radixin OS=Homo sapiens OX=9606 GN=RDX PE=1 SV=1	39	30	80	16	583	68.5	6.37	122.55	125.9	123.8	63.7	107.3	84.5	94.8
P50454	Serpin H1 OS=Homo sapiens OX=9606 GN=SERPINH1 PE=1 SV=2	50	17	45	17	418	46.4	8.69	94.27	76.8	69.2	149	69.5	156.9	78.7
Q8WUM4	Programmed cell death 6-interacting protein OS=Homo sapiens OX=9606 GN=PDCD6IP PE=1 SV=1	36	33	51	33	868	96	6.52	87.54	107.6	103.2	96.6	99.8	103.4	89.3
P53396	ATP-citrate synthase OS=Homo sapiens OX=9606 GN=ACLY PE=1 SV=3	36	34	44	34	1101	120.8	7.33	73.41	102.9	106.5	102.5	100.8	91.8	95.5
P12956	X-ray repair cross-complementing protein 6 OS=Homo sapiens OX=9606 GN=XRCC6 PE=1 SV=2	42	28	57	28	609	69.8	6.64	84.13	92.3	84.8	133	85.8	119.2	84.8
P00325	All-trans-retinol dehydrogenase [NAD(+)] ADH1B OS=Homo sapiens OX=9606 GN=ADH1B PE=1 SV=2	45	18	116	7	375	39.8	8.29	199.81	119.4	120.8	58.4	125.1	66.8	109.5
P68371	Tubulin beta-4B chain OS=Homo sapiens OX=9606 GN=TUBB4B PE=1 SV=1	54	17	124	3	445	49.8	4.89	219.87	105	92.5	111.4	88	117.3	85.7
P02774	Vitamin D-binding protein OS=Homo sapiens OX=9606 GN=GC PE=1 SV=2	51	23	76	23	474	52.9	5.45	132.91	96.2	112.3	68.7	121.5	74.1	127.3
P02788	Lactotransferrin OS=Homo sapiens OX=9606 GN=LTF PE=1 SV=6	45	26	53	26	710	78.1	8.12	97.33	130.7	136.5	65.1	87.3	69.5	110.9
P01009	Alpha-1-antitrypsin OS=Homo sapiens OX=9606 GN=SERPINA1 PE=1 SV=3	44	21	136	21	418	46.7	5.59	204.38	85.2	106.7	62.9	126	72.8	146.4
P20700	Lamin-B1 OS=Homo sapiens OX=9606 GN=LMNB1 PE=1 SV=2	49	31	60	28	586	66.4	5.16	110.15	84	75.6	172.2	74.5	115.4	78.3
Q05682	Caldesmon OS=Homo sapiens OX=9606 GN=CALD1 PE=1 SV=3	35	23	48	23	793	93.2	5.66	90.59	111.4	106.9	96.3	105.4	85.3	94.7
P20810	Calpastatin OS=Homo sapiens OX=9606 GN=CAST PE=1 SV=4	55	33	59	33	708	76.5	5.07	84.29	105.2	98.3	109	94	99.8	93.6
Q9NZN4	EH domain-containing protein 2 OS=Homo sapiens OX=9606 GN=EHD2 PE=1 SV=2	52	23	65	21	543	61.1	6.46	128.29	139	133.7	54.8	121	57.7	93.8
P06576	ATP synthase subunit beta, mitochondrial OS=Homo sapiens OX=9606 GN=ATP5F1B PE=1 SV=3	44	19	61	19	529	56.5	5.4	105.06	96.2	97.9	118.6	95.1	102.3	89.9
P17661	Desmin OS=Homo sapiens OX=9606 GN=DES PE=1 SV=3	51	26	91	21	470	53.5	5.27	148.59	126.2	146.1	64.2	101.4	76.9	85.2
P27816	Microtubule-associated protein 4 OS=Homo sapiens OX=9606 GN=MAP4 PE=1 SV=3	29	32	54	32	1152	120.9	5.43	77.71	115.7	103.2	96.6	97.4	97.7	89.4
Q06830	Peroxiredoxin-1 OS=Homo sapiens OX=9606 GN=PRDX1 PE=1 SV=1	70	15	94	13	199	22.1	8.13	169.49	85	84	157.1	91.6	101.2	81
P40926	Malate dehydrogenase, mitochondrial OS=Homo sapiens OX=9606 GN=MDH2 PE=1 SV=3	54	15	67	15	338	35.5	8.68	115.54	86.3	74.7	152.5	75.5	136.8	74.2
P38646	Stress-70 protein, mitochondrial OS=Homo sapiens OX=9606 GN=HSPA9 PE=1 SV=2	43	26	56	26	679	73.6	6.16	99.84	88.9	78.3	151.8	82.4	115.7	82.8
Q99798	Aconitate hydratase, mitochondrial OS=Homo sapiens OX=9606 GN=ACO2 PE=1 SV=2	41	27	45	27	780	85.4	7.61	66.63	97.9	88.9	132.1	89.4	100.4	91.3
P00915	Carbonic anhydrase 1 OS=Homo sapiens OX=9606 GN=CA1 PE=1 SV=2	66	13	170	13	261	28.9	7.12	300.2	81.9	147.1	55.9	135.2	54.3	125.6
P10412	Histone H1.4 OS=Homo sapiens OX=9606 GN=H1-4 PE=1 SV=2	54	17	164	5	219	21.9	11.03	268.83	112.2	102.6	113.2	92.1	96.1	83.7
P53621	Coatomer subunit alpha OS=Homo sapiens OX=9606 GN=COPA PE=1 SV=2	28	30	40	30	1224	138.3	7.66	74.19	94.7	78.6	117	82.8	141.4	85.5
Q8WWI1	LIM domain only protein 7 OS=Homo sapiens OX=9606 GN=LMO7 PE=1 SV=3	25	32	52	32	1683	192.6	8.09	68.88	125.7	114	84.5	104.3	79.6	91.9
P00918	Carbonic anhydrase 2 OS=Homo sapiens OX=9606 GN=CA2 PE=1 SV=2	62	15	62	15	260	29.2	7.4	104.11	73.5	106.9	72.1	129.3	105.5	112.6
P01833	Polymeric immunoglobulin receptor OS=Homo sapiens OX=9606 GN=PIGR PE=1 SV=4	34	25	63	25	764	83.2	5.74	112.89	93.4	74.4	78.1	62.3	213.8	78.1
P11216	Glycogen phosphorylase, brain form OS=Homo sapiens OX=9606 GN=PYGB PE=1 SV=5	40	30	52	23	843	96.6	6.86	95.43	95.8	93.7	104.9	89.1	124.4	92.1
P52272	Heterogeneous nuclear ribonucleoprotein M OS=Homo sapiens OX=9606 GN=HNRNPM PE=1 SV=3	45	30	56	30	730	77.5	8.7	89.87	98.1	87.8	121.3	87.6	119.7	85.5
P69891	Hemoglobin subunit gamma-1 OS=Homo sapiens OX=9606 GN=HBG1 PE=1 SV=2	76	12	76	11	147	16.1	7.2	143.07	86.8	168.8	65.2	176.9	38.3	63.9
O43491	Band 4.1-like protein 2 OS=Homo sapiens OX=9606 GN=EPB41L2 PE=1 SV=1	33	29	48	27	1005	112.5	5.44	79.17	113.6	113.2	81.6	116.6	77.7	97.2
P02790	Hemopexin OS=Homo sapiens OX=9606 GN=HPX PE=1 SV=2	36	15	78	15	462	51.6	7.02	156.14	96.7	116	73.3	120.3	72.2	121.4
P09874	Poly [ADP-ribose] polymerase 1 OS=Homo sapiens OX=9606 GN=PARP1 PE=1 SV=4	32	30	44	30	1014	113	8.88	70.15	81.7	76.6	139.9	77.5	144.8	79.5
P23141	Liver carboxylesterase 1 OS=Homo sapiens OX=9606 GN=CES1 PE=1 SV=2	43	20	50	20	567	62.5	6.6	96.15	122.3	119.3	95.5	105	71.1	86.8
Q01518	Adenylyl cyclase-associated protein 1 OS=Homo sapiens OX=9606 GN=CAP1 PE=1 SV=5	40	23	67	21	475	51.9	8.06	130.94	105.2	84.9	117.6	96.1	104.6	91.6
P30740	Leukocyte elastase inhibitor OS=Homo sapiens OX=9606 GN=SERPINB1 PE=1 SV=1	49	19	48	19	379	42.7	6.28	80.29	95	95.8	104.4	88.6	130.2	85.9
P25705	ATP synthase subunit alpha, mitochondrial OS=Homo sapiens OX=9606 GN=ATP5F1A PE=1 SV=1	39	22	55	22	553	59.7	9.13	105.83	100.7	89.7	121.6	87.2	118	82.8
P01859	Immunoglobulin heavy constant gamma 2 OS=Homo sapiens OX=9606 GN=IGHG2 PE=1 SV=2	42	11	160	5	326	35.9	7.59	306.06	96.6	122	56.8	113.7	71.5	139.5
P00338	L-lactate dehydrogenase A chain OS=Homo sapiens OX=9606 GN=LDHA PE=1 SV=2	39	15	71	14	332	36.7	8.27	121.37	90.8	79.1	143.4	76.3	125.8	84.6
Q13423	NAD(P) transhydrogenase, mitochondrial OS=Homo sapiens OX=9606 GN=NNT PE=1 SV=3	28	27	39	27	1086	113.8	8.09	74.7	87.4	80.4	140.3	76.4	136.4	79.1
P00747	Plasminogen OS=Homo sapiens OX=9606 GN=PLG PE=1 SV=2	36	28	53	28	810	90.5	7.24	86.08	99	110.2	73.7	110.7	73.6	132.8
P21397	Amine oxidase [flavin-containing] A OS=Homo sapiens OX=9606 GN=MAOA PE=1 SV=1	35	17	39	12	527	59.6	7.85	76.94	94.3	88.9	143.7	87.6	102.5	83.1
Q13885	Tubulin beta-2A chain OS=Homo sapiens OX=9606 GN=TUBB2A PE=1 SV=1	35	13	113	1	445	49.9	4.89	187.85	97.6	110	90.8	110.4	89.2	102.1
Q9Y3Z3	Deoxynucleoside triphosphate triphosphohydrolase SAMHD1 OS=Homo sapiens OX=9606 GN=SAMHD1 PE=1 SV=2	40	26	48	26	626	72.2	7.14	67.21	107.7	91.6	98.1	100.8	104	97.9
P14866	Heterogeneous nuclear ribonucleoprotein L OS=Homo sapiens OX=9606 GN=HNRNPL PE=1 SV=2	46	18	44	17	589	64.1	8.22	66.53	100	78.5	132.7	82.3	125.4	81.1
P31948	Stress-induced-phosphoprotein 1 OS=Homo sapiens OX=9606 GN=STIP1 PE=1 SV=1	44	32	47	32	543	62.6	6.8	77.64	95.9	89.8	131.2	91.6	102.9	88.6
Q9H4M9	EH domain-containing protein 1 OS=Homo sapiens OX=9606 GN=EHD1 PE=1 SV=2	42	23	57	16	534	60.6	6.83	90.77	127.6	127.7	70.8	111.3	70.1	92.5
P50895	Basal cell adhesion molecule OS=Homo sapiens OX=9606 GN=BCAM PE=1 SV=2	44	21	42	21	628	67.4	5.81	66.21	131.4	128.8	68.3	115.5	60.2	95.8
P22626	Heterogeneous nuclear ribonucleoproteins A2/B1 OS=Homo sapiens OX=9606 GN=HNRNPA2B1 PE=1 SV=2	44	18	70	16	353	37.4	8.95	95.99	98	80	138.8	81.4	119.2	82.6
P62258	14-3-3 protein epsilon OS=Homo sapiens OX=9606 GN=YWHAE PE=1 SV=1	53	16	68	14	255	29.2	4.74	128.99	105.5	105.2	93	98.5	107.1	90.7
P26640	Valine--tRNA ligase OS=Homo sapiens OX=9606 GN=VARS PE=1 SV=4	23	26	38	26	1264	140.4	7.59	58.02	93.2	88.8	116.4	90.7	122.1	88.7
Q96KP4	Cytosolic non-specific dipeptidase OS=Homo sapiens OX=9606 GN=CNDP2 PE=1 SV=2	45	16	44	16	475	52.8	5.97	79	105.5	97.2	92.2	104.5	112.9	87.7
Q86VP6	Cullin-associated NEDD8-dissociated protein 1 OS=Homo sapiens OX=9606 GN=CAND1 PE=1 SV=2	23	25	44	25	1230	136.3	5.78	78.82	100.9	98.9	100.4	100.1	105.4	94.3
Q03252	Lamin-B2 OS=Homo sapiens OX=9606 GN=LMNB2 PE=1 SV=4	44	30	58	27	620	69.9	5.59	95.23	107.6	101.2	100.5	93.6	103.1	94
P09493	Tropomyosin alpha-1 chain OS=Homo sapiens OX=9606 GN=TPM1 PE=1 SV=2	56	24	65	11	284	32.7	4.74	94.5	111.1	104.8	91.3	94.6	110.8	87.5
P16403	Histone H1.2 OS=Homo sapiens OX=9606 GN=H1-2 PE=1 SV=2	49	15	152	4	213	21.4	10.93	256.33	111.8	81.8	145.1	91.5	92.1	77.8
P13010	X-ray repair cross-complementing protein 5 OS=Homo sapiens OX=9606 GN=XRCC5 PE=1 SV=3	34	25	51	25	732	82.7	5.81	91.8	94.5	90.2	122.7	85.6	115.8	91.2
P63104	14-3-3 protein zeta/delta OS=Homo sapiens OX=9606 GN=YWHAZ PE=1 SV=1	51	15	58	11	245	27.7	4.79	103.57	114	93.4	102.8	93.2	108.5	88.1
P50990	T-complex protein 1 subunit theta OS=Homo sapiens OX=9606 GN=CCT8 PE=1 SV=4	44	22	41	22	548	59.6	5.6	62.16	99.2	93.7	113.1	93.1	107.6	93.3
Q9H4A4	Aminopeptidase B OS=Homo sapiens OX=9606 GN=RNPEP PE=1 SV=2	41	21	39	21	650	72.5	5.74	74.49	87.7	80.5	119.7	88.4	140.3	83.4
P14550	Aldo-keto reductase family 1 member A1 OS=Homo sapiens OX=9606 GN=AKR1A1 PE=1 SV=3	66	18	38	18	325	36.6	6.79	63.44	90.7	78.2	156.4	87.6	101	86
Q14697	Neutral alpha-glucosidase AB OS=Homo sapiens OX=9606 GN=GANAB PE=1 SV=3	25	21	50	21	944	106.8	6.14	74.02	93.7	83.4	126.1	85.8	126.1	84.9
P23528	Cofilin-1 OS=Homo sapiens OX=9606 GN=CFL1 PE=1 SV=3	73	19	66	15	166	18.5	8.09	114.14	111.6	88.3	110.5	90.2	109.9	89.5
P30041	Peroxiredoxin-6 OS=Homo sapiens OX=9606 GN=PRDX6 PE=1 SV=3	70	14	57	14	224	25	6.38	119.32	82.9	94.7	97.4	101.1	130.9	93.1
Q08211	ATP-dependent RNA helicase A OS=Homo sapiens OX=9606 GN=DHX9 PE=1 SV=4	25	25	39	25	1270	140.9	6.84	62.86	95.1	89.2	122.8	90.2	117	85.6
P40939	Trifunctional enzyme subunit alpha, mitochondrial OS=Homo sapiens OX=9606 GN=HADHA PE=1 SV=2	32	22	40	22	763	82.9	9.04	79.14	102.8	100.1	111.5	92.2	105.2	88.3
P49748	Very long-chain specific acyl-CoA dehydrogenase, mitochondrial OS=Homo sapiens OX=9606 GN=ACADVL PE=1 SV=1	38	20	38	20	655	70.3	8.75	55.92	90	96.9	91.7	94.2	131.6	95.6
P34932	Heat shock 70 kDa protein 4 OS=Homo sapiens OX=9606 GN=HSPA4 PE=1 SV=4	43	31	45	30	840	94.3	5.19	64.79	93.2	97.4	127.9	87.7	105.3	88.6
O43795	Unconventional myosin-Ib OS=Homo sapiens OX=9606 GN=MYO1B PE=1 SV=3	23	27	40	27	1136	131.9	9.38	67.73	107.6	106.2	84.3	96.6	115.2	90
O75874	Isocitrate dehydrogenase [NADP] cytoplasmic OS=Homo sapiens OX=9606 GN=IDH1 PE=1 SV=2	48	21	53	21	414	46.6	7.01	80.31	81.9	73.3	125.8	78.5	162.5	77.9
Q7KZF4	Staphylococcal nuclease domain-containing protein 1 OS=Homo sapiens OX=9606 GN=SND1 PE=1 SV=1	32	27	43	27	910	101.9	7.17	74.33	94.6	82	123.5	83.5	129.4	87.1
P67936	Tropomyosin alpha-4 chain OS=Homo sapiens OX=9606 GN=TPM4 PE=1 SV=3	55	21	85	9	248	28.5	4.69	143.44	114.4	108.4	78.1	97.1	105.8	96.2
Q14195	Dihydropyrimidinase-related protein 3 OS=Homo sapiens OX=9606 GN=DPYSL3 PE=1 SV=1	36	16	42	14	570	61.9	6.49	89.62	118.2	118.5	87.7	104.2	75.4	96
P18669	Phosphoglycerate mutase 1 OS=Homo sapiens OX=9606 GN=PGAM1 PE=1 SV=2	52	14	49	14	254	28.8	7.18	77.53	105.2	98.9	100	96.2	109.8	89.9
Q02952	A-kinase anchor protein 12 OS=Homo sapiens OX=9606 GN=AKAP12 PE=1 SV=4	24	32	38	32	1782	191.4	4.41	36.74	111.1	122.7	61.5	106.7	75.7	122.3
P01008	Antithrombin-III OS=Homo sapiens OX=9606 GN=SERPINC1 PE=1 SV=1	38	18	47	18	464	52.6	6.71	67.89	98.4	113.5	70.3	122.7	70.7	124.4
P37837	Transaldolase OS=Homo sapiens OX=9606 GN=TALDO1 PE=1 SV=2	41	17	61	17	337	37.5	6.81	104.03	95.8	90.5	130.5	88.5	108.6	86.2
Q9H223	EH domain-containing protein 4 OS=Homo sapiens OX=9606 GN=EHD4 PE=1 SV=1	46	21	42	16	541	61.1	6.76	79.69	125.1	116.9	75.8	103.6	75.1	103.5
P19338	Nucleolin OS=Homo sapiens OX=9606 GN=NCL PE=1 SV=3	34	28	50	28	710	76.6	4.7	85.24	95.7	79.3	141.2	80.5	120.2	83
Q01995	Transgelin OS=Homo sapiens OX=9606 GN=TAGLN PE=1 SV=4	66	14	59	14	201	22.6	8.84	102.26	110.6	113.2	87.6	109.7	84.6	94.4
P51659	Peroxisomal multifunctional enzyme type 2 OS=Homo sapiens OX=9606 GN=HSD17B4 PE=1 SV=3	37	23	42	23	736	79.6	8.84	66.12	109.1	102.1	99.8	102.8	106.9	79.4
P12270	Nucleoprotein TPR OS=Homo sapiens OX=9606 GN=TPR PE=1 SV=3	17	37	39	37	2363	267.1	5.02	40.9	95.9	90.2	120.2	88.3	115.4	90
P32119	Peroxiredoxin-2 OS=Homo sapiens OX=9606 GN=PRDX2 PE=1 SV=5	58	11	90	10	198	21.9	5.97	209.48	77.9	129.4	62.9	135.8	69.6	124.4
P09211	Glutathione S-transferase P OS=Homo sapiens OX=9606 GN=GSTP1 PE=1 SV=2	55	9	64	9	210	23.3	5.64	114.47	104.4	98.3	105.5	88.1	127.2	76.4
Q00839	Heterogeneous nuclear ribonucleoprotein U OS=Homo sapiens OX=9606 GN=HNRNPU PE=1 SV=6	28	23	56	23	825	90.5	6	86.03	94.9	78.6	141	80.9	125.9	78.7
Q9BXM0	Periaxin OS=Homo sapiens OX=9606 GN=PRX PE=1 SV=2	30	28	43	28	1461	154.8	7.5	69.3	121.4	134	62.2	125.8	63.9	92.7
O75083	WD repeat-containing protein 1 OS=Homo sapiens OX=9606 GN=WDR1 PE=1 SV=4	43	21	39	21	606	66.2	6.65	88.14	113.2	96.8	106.1	92.9	102.1	88.9
P49411	Elongation factor Tu, mitochondrial OS=Homo sapiens OX=9606 GN=TUFM PE=1 SV=2	45	19	41	19	452	49.5	7.61	71.33	93.4	82.4	136.5	80.2	127.7	79.7
Q07157	Tight junction protein ZO-1 OS=Homo sapiens OX=9606 GN=TJP1 PE=1 SV=3	21	28	37	28	1748	195.3	6.7	52.3	124.6	114.6	79.1	104.3	83.4	94.1
P62937	Peptidyl-prolyl cis-trans isomerase A OS=Homo sapiens OX=9606 GN=PPIA PE=1 SV=2	68	14	107	13	165	18	7.81	160.79	94.6	83.8	138.4	82.5	120.5	80.2
P00734	Prothrombin OS=Homo sapiens OX=9606 GN=F2 PE=1 SV=2	43	24	44	24	622	70	5.9	74.87	90.6	108.9	71.7	110.4	84.7	133.6
Q07065	Cytoskeleton-associated protein 4 OS=Homo sapiens OX=9606 GN=CKAP4 PE=1 SV=2	42	22	40	22	602	66	5.92	54.29	91.7	86.6	103.3	83.3	145.9	89.2
P14543	Nidogen-1 OS=Homo sapiens OX=9606 GN=NID1 PE=1 SV=3	21	23	40	22	1247	136.3	5.29	67.23	135.1	124.9	76	107.6	67.4	89
Q9Y6N5	Sulfide:quinone oxidoreductase, mitochondrial OS=Homo sapiens OX=9606 GN=SQOR PE=1 SV=1	44	20	36	20	450	49.9	9.11	76.62	110.4	79.6	123.2	88.9	110.2	87.7
Q16891	MICOS complex subunit MIC60 OS=Homo sapiens OX=9606 GN=IMMT PE=1 SV=1	34	24	44	24	758	83.6	6.48	73.72	103.2	92	119.1	88.2	109.8	87.7
Q96AC1	Fermitin family homolog 2 OS=Homo sapiens OX=9606 GN=FERMT2 PE=1 SV=1	38	26	43	26	680	77.8	6.7	84.25	121	123.6	75.9	109.8	75.7	94
P00739	Haptoglobin-related protein OS=Homo sapiens OX=9606 GN=HPR PE=2 SV=2	33	15	88	1	348	39	7.09	150.65	82.6	116.4	71	133.6	55.6	140.6
P07951	Tropomyosin beta chain OS=Homo sapiens OX=9606 GN=TPM2 PE=1 SV=1	49	19	73	3	284	32.8	4.7	114.63	118.6	116.2	86	100.9	81.2	97
P23381	Tryptophan--tRNA ligase, cytoplasmic OS=Homo sapiens OX=9606 GN=WARS PE=1 SV=2	46	17	40	17	471	53.1	6.23	62.34	120.3	115.4	77.6	125.3	71.5	89.9
P23284	Peptidyl-prolyl cis-trans isomerase B OS=Homo sapiens OX=9606 GN=PPIB PE=1 SV=2	54	14	60	13	216	23.7	9.41	112.7	88.3	73.2	126.1	79.7	152.4	80.3
P22897	Macrophage mannose receptor 1 OS=Homo sapiens OX=9606 GN=MRC1 PE=1 SV=1	21	28	40	28	1456	165.9	6.54	60.13	106.4	82.1	90.8	95.1	135.4	90.1
P23246	Splicing factor, proline- and glutamine-rich OS=Homo sapiens OX=9606 GN=SFPQ PE=1 SV=2	29	19	40	18	707	76.1	9.44	78.33	100.2	83.5	133.4	81.3	122	79.6
P05556	Integrin beta-1 OS=Homo sapiens OX=9606 GN=ITGB1 PE=1 SV=2	20	17	37	17	798	88.4	5.39	67.44	126	103.7	85.7	95.9	95.9	92.8
Q6NZI2	Caveolae-associated protein 1 OS=Homo sapiens OX=9606 GN=CAVIN1 PE=1 SV=1	31	16	65	16	390	43.5	5.6	91.83	142.2	132.2	55.5	117.8	54.6	97.8
P27824	Calnexin OS=Homo sapiens OX=9606 GN=CANX PE=1 SV=2	35	21	61	21	592	67.5	4.6	68.2	89.9	78.3	149.5	81.1	121.5	79.6
P16401	Histone H1.5 OS=Homo sapiens OX=9606 GN=H1-5 PE=1 SV=3	44	13	65	8	226	22.6	10.92	110.86	91	65.4	191.3	73.2	104.8	74.2
P37802	Transgelin-2 OS=Homo sapiens OX=9606 GN=TAGLN2 PE=1 SV=3	54	10	46	10	199	22.4	8.25	92.61	101	91.3	106.9	77.8	142.4	80.6
P04843	Dolichyl-diphosphooligosaccharide--protein glycosyltransferase subunit 1 OS=Homo sapiens OX=9606 GN=RPN1 PE=1 SV=1	39	22	41	22	607	68.5	6.38	88.28	92	81.5	122	83	135.5	86.1
Q15661	Tryptase alpha/beta-1 OS=Homo sapiens OX=9606 GN=TPSAB1 PE=1 SV=1	31	9	71	9	275	30.5	7.11	136.07	120.6	93.8	93.8	122.6	100.3	68.8
P06727	Apolipoprotein A-IV OS=Homo sapiens OX=9606 GN=APOA4 PE=1 SV=3	55	22	36	22	396	45.4	5.38	71.15	94	110.9	67.7	113.9	76.3	137.2
P62805	Histone H4 OS=Homo sapiens OX=9606 GN=H4C1 PE=1 SV=2	60	9	218	9	103	11.4	11.36	381.68	103.4	100.5	112.2	92.9	103.1	87.8
Q15084	Protein disulfide-isomerase A6 OS=Homo sapiens OX=9606 GN=PDIA6 PE=1 SV=1	44	17	38	17	440	48.1	5.08	63.67	91.7	84.3	131.5	90.9	116.3	85.3
P21810	Biglycan OS=Homo sapiens OX=9606 GN=BGN PE=1 SV=2	38	11	52	10	368	41.6	7.52	130.22	103.7	107.3	75.8	112.5	77.5	123.3
Q92841	Probable ATP-dependent RNA helicase DDX17 OS=Homo sapiens OX=9606 GN=DDX17 PE=1 SV=2	37	25	41	17	729	80.2	8.27	68.91	92.2	89.7	121.2	90.3	119.7	86.8
P00367	Glutamate dehydrogenase 1, mitochondrial OS=Homo sapiens OX=9606 GN=GLUD1 PE=1 SV=2	34	18	39	18	558	61.4	7.8	70.48	116.5	97.7	101.9	93.2	99.4	91.3
P33176	Kinesin-1 heavy chain OS=Homo sapiens OX=9606 GN=KIF5B PE=1 SV=1	34	30	40	30	963	109.6	6.51	44.44	104.9	96	112	88.3	111	87.8
P55786	Puromycin-sensitive aminopeptidase OS=Homo sapiens OX=9606 GN=NPEPPS PE=1 SV=2	26	23	38	23	919	103.2	5.72	61.53	99.6	101.5	106.9	96	103.1	92.8
Q06323	Proteasome activator complex subunit 1 OS=Homo sapiens OX=9606 GN=PSME1 PE=1 SV=1	60	16	39	16	249	28.7	6.02	85.08	98	90.9	127.7	102.1	98.9	82.5
P01871	Immunoglobulin heavy constant mu OS=Homo sapiens OX=9606 GN=IGHM PE=1 SV=4	28	12	52	12	453	49.4	6.77	97.61	89	128.5	75.9	139.9	60.2	106.5
P09525	Annexin A4 OS=Homo sapiens OX=9606 GN=ANXA4 PE=1 SV=4	57	18	48	17	319	35.9	6.13	85.79	119.3	99.1	100.3	96.3	93.6	91.3
P00751	Complement factor B OS=Homo sapiens OX=9606 GN=CFB PE=1 SV=2	27	22	43	22	764	85.5	7.06	72.47	90.8	108.7	76.8	131.7	74.4	117.6
P07339	Cathepsin D OS=Homo sapiens OX=9606 GN=CTSD PE=1 SV=1	39	13	54	13	412	44.5	6.54	71.8	105.3	85.5	104.8	99.2	109.1	96.1
P07942	Laminin subunit beta-1 OS=Homo sapiens OX=9606 GN=LAMB1 PE=1 SV=2	16	26	35	26	1786	197.9	4.94	59.54	119.1	113.4	75.3	105.2	87.2	99.8
P12429	Annexin A3 OS=Homo sapiens OX=9606 GN=ANXA3 PE=1 SV=3	50	19	60	19	323	36.4	5.92	92.7	134.7	137.4	70.4	108.6	59	89.8
O43390	Heterogeneous nuclear ribonucleoprotein R OS=Homo sapiens OX=9606 GN=HNRNPR PE=1 SV=1	37	23	40	17	633	70.9	8.13	56.87	98	84.1	132.6	84.6	115	85.8
Q9Y4G6	Talin-2 OS=Homo sapiens OX=9606 GN=TLN2 PE=1 SV=4	13	30	44	16	2542	271.4	5.57	65.47	102.5	97.4	103.6	94.4	109.9	92.3
P06753	Tropomyosin alpha-3 chain OS=Homo sapiens OX=9606 GN=TPM3 PE=1 SV=2	47	20	57	8	285	32.9	4.72	79.1	106.3	97.3	98.4	85.8	124.6	87.6
P07737	Profilin-1 OS=Homo sapiens OX=9606 GN=PFN1 PE=1 SV=2	74	11	53	11	140	15	8.27	101.67	108	91.5	95.9	99	114.6	91
P04792	Heat shock protein beta-1 OS=Homo sapiens OX=9606 GN=HSPB1 PE=1 SV=2	68	15	59	15	205	22.8	6.4	113.58	84	77.8	153.3	78.2	126.1	80.7
P01860	Immunoglobulin heavy constant gamma 3 OS=Homo sapiens OX=9606 GN=IGHG3 PE=1 SV=2	40	11	176	5	377	41.3	7.9	330.64	87.2	110.9	56.3	99.5	85.2	160.8
P13489	Ribonuclease inhibitor OS=Homo sapiens OX=9606 GN=RNH1 PE=1 SV=2	49	16	37	16	461	49.9	4.82	68.91	101.9	95.6	100.8	95.3	108.5	97.9
P00390	Glutathione reductase, mitochondrial OS=Homo sapiens OX=9606 GN=GSR PE=1 SV=2	47	17	32	17	522	56.2	8.5	48.88	88.4	78.9	110.7	80.6	162.5	79
P10809	60 kDa heat shock protein, mitochondrial OS=Homo sapiens OX=9606 GN=HSPD1 PE=1 SV=2	39	20	41	20	573	61	5.87	70.31	95.2	78.7	154.1	78.6	112	81.4
Q15075	Early endosome antigen 1 OS=Homo sapiens OX=9606 GN=EEA1 PE=1 SV=2	22	29	36	28	1411	162.4	5.68	47.7	103.6	101.7	91.7	100.1	107.1	95.8
P36871	Phosphoglucomutase-1 OS=Homo sapiens OX=9606 GN=PGM1 PE=1 SV=3	36	20	38	20	562	61.4	6.76	61.87	110.4	102	95.8	98.6	113.5	79.7
P30043	Flavin reductase (NADPH) OS=Homo sapiens OX=9606 GN=BLVRB PE=1 SV=3	61	9	46	9	206	22.1	7.65	114.68	85.3	109	77	119.9	95.4	113.4
P09429	High mobility group protein B1 OS=Homo sapiens OX=9606 GN=HMGB1 PE=1 SV=3	35	13	52	10	215	24.9	5.74	96.84	104.7	88.5	130.4	83.9	104.2	88.4
Q1KMD3	Heterogeneous nuclear ribonucleoprotein U-like protein 2 OS=Homo sapiens OX=9606 GN=HNRNPUL2 PE=1 SV=1	28	19	33	19	747	85.1	4.91	56.51	95.7	88.6	116.1	88.5	122.1	89
P31150	Rab GDP dissociation inhibitor alpha OS=Homo sapiens OX=9606 GN=GDI1 PE=1 SV=2	44	16	32	9	447	50.6	5.14	63.42	106.3	104.4	105.8	101	87.2	95.3
Q13510	Acid ceramidase OS=Homo sapiens OX=9606 GN=ASAH1 PE=1 SV=5	39	15	38	15	395	44.6	7.62	72.91	103.2	93.7	100.6	99	116	87.5
O60716	Catenin delta-1 OS=Homo sapiens OX=9606 GN=CTNND1 PE=1 SV=1	29	23	33	23	968	108.1	6.23	51.77	105.2	109.7	102.9	97.7	95	89.5
Q14203	Dynactin subunit 1 OS=Homo sapiens OX=9606 GN=DCTN1 PE=1 SV=3	25	24	29	24	1278	141.6	5.81	52.12	107.7	99.8	96	97	111.2	88.3
P61978	Heterogeneous nuclear ribonucleoprotein K OS=Homo sapiens OX=9606 GN=HNRNPK PE=1 SV=1	34	14	41	14	463	50.9	5.54	95.24	99.1	88.9	126	87.8	115.7	82.5
P08572	Collagen alpha-2(IV) chain OS=Homo sapiens OX=9606 GN=COL4A2 PE=1 SV=4	9	10	40	10	1712	167.4	8.66	85.97	133.2	105.4	82.5	112.6	67.2	99.1
P34931	Heat shock 70 kDa protein 1-like OS=Homo sapiens OX=9606 GN=HSPA1L PE=1 SV=2	24	14	60	1	641	70.3	6.02	118.37
P16402	Histone H1.3 OS=Homo sapiens OX=9606 GN=H1-3 PE=1 SV=2	46	15	131	5	221	22.3	11.02	231.1	127.4	75.2	115.8	95.1	101.4	85
P61158	Actin-related protein 3 OS=Homo sapiens OX=9606 GN=ACTR3 PE=1 SV=3	34	13	44	13	418	47.3	5.88	80.72	105.6	92.4	104	97	104.4	96.5
P01834	Immunoglobulin kappa constant OS=Homo sapiens OX=9606 GN=IGKC PE=1 SV=2	67	6	73	6	107	11.8	6.52	167.4	81.5	106.2	64.2	116.4	81.7	150.1
Q99536	Synaptic vesicle membrane protein VAT-1 homolog OS=Homo sapiens OX=9606 GN=VAT1 PE=1 SV=2	35	11	36	11	393	41.9	6.29	66.72	104.7	101	86.8	120.3	90.8	96.4
Q15063	Periostin OS=Homo sapiens OX=9606 GN=POSTN PE=1 SV=2	27	19	31	19	836	93.3	7.53	66.86	78.7	91.2	85.4	122.8	90.8	131.2
P48681	Nestin OS=Homo sapiens OX=9606 GN=NES PE=1 SV=2	21	27	33	27	1621	177.3	4.36	42.46	114	119.4	76.8	107.7	79.1	103
P16615	Sarcoplasmic/endoplasmic reticulum calcium ATPase 2 OS=Homo sapiens OX=9606 GN=ATP2A2 PE=1 SV=1	24	22	34	17	1042	114.7	5.34	59.65	97.2	87.1	113.4	89.3	124	89.1
Q15181	Inorganic pyrophosphatase OS=Homo sapiens OX=9606 GN=PPA1 PE=1 SV=2	61	15	30	15	289	32.6	5.86	64.64	91.9	77.9	100.7	87.1	158.8	83.7
P01042	Kininogen-1 OS=Homo sapiens OX=9606 GN=KNG1 PE=1 SV=2	28	18	42	18	644	71.9	6.81	70.46	91.5	118.8	66.2	118.8	73.9	130.8
P48643	T-complex protein 1 subunit epsilon OS=Homo sapiens OX=9606 GN=CCT5 PE=1 SV=1	35	20	32	19	541	59.6	5.66	60.22	98.1	92.3	110.3	97.1	104.5	97.6
Q9NZU5	LIM and cysteine-rich domains protein 1 OS=Homo sapiens OX=9606 GN=LMCD1 PE=1 SV=1	55	19	31	19	365	40.8	7.93	48.37	112.3	107.1	107.5	98.9	88.1	86
P55084	Trifunctional enzyme subunit beta, mitochondrial OS=Homo sapiens OX=9606 GN=HADHB PE=1 SV=3	31	16	38	16	474	51.3	9.41	60.68	104.5	89.2	110.6	93.1	109.7	92.9
O95810	Caveolae-associated protein 2 OS=Homo sapiens OX=9606 GN=CAVIN2 PE=1 SV=3	27	12	37	12	425	47.1	5.21	77.22	132.1	122.4	66.2	117.4	65.5	96.5
P30086	Phosphatidylethanolamine-binding protein 1 OS=Homo sapiens OX=9606 GN=PEBP1 PE=1 SV=3	79	10	44	10	187	21	7.53	89.3	101.2	98.4	104.2	93.3	114.7	88.3
P54652	Heat shock-related 70 kDa protein 2 OS=Homo sapiens OX=9606 GN=HSPA2 PE=1 SV=1	27	15	54	5	639	70	5.74	90.31	105.6	130.8	76.8	113.1	83	90.8
P55196	Afadin OS=Homo sapiens OX=9606 GN=AFDN PE=1 SV=3	19	31	39	31	1824	206.7	6.47	36.58	111.8	107.4	106.9	95.3	87.6	91
Q15582	Transforming growth factor-beta-induced protein ig-h3 OS=Homo sapiens OX=9606 GN=TGFBI PE=1 SV=1	35	19	35	19	683	74.6	7.71	63.77	109.4	97.4	121.4	91.2	81.3	99.3
Q92499	ATP-dependent RNA helicase DDX1 OS=Homo sapiens OX=9606 GN=DDX1 PE=1 SV=2	36	22	32	22	740	82.4	7.23	45.11	101	87.5	120.2	83.9	116.4	91
P04003	C4b-binding protein alpha chain OS=Homo sapiens OX=9606 GN=C4BPA PE=1 SV=2	31	15	25	15	597	67	7.3	44.58	76.2	88.6	81.3	101.6	144	108.2
P51884	Lumican OS=Homo sapiens OX=9606 GN=LUM PE=1 SV=2	33	9	63	9	338	38.4	6.61	122.32	102.3	106.6	60.8	98.9	74.6	156.8
P49368	T-complex protein 1 subunit gamma OS=Homo sapiens OX=9606 GN=CCT3 PE=1 SV=4	46	20	37	20	545	60.5	6.49	58.35	96.5	95.1	116.6	92.8	105.3	93.7
P27348	14-3-3 protein theta OS=Homo sapiens OX=9606 GN=YWHAQ PE=1 SV=1	43	14	45	9	245	27.7	4.78	72.15	99.4	89.1	119.5	88.2	117.8	86.1
Q14103	Heterogeneous nuclear ribonucleoprotein D0 OS=Homo sapiens OX=9606 GN=HNRNPD PE=1 SV=1	42	18	43	17	355	38.4	7.81	60.6	94.3	80.4	133.4	78.4	132.5	80.9
Q10567	AP-1 complex subunit beta-1 OS=Homo sapiens OX=9606 GN=AP1B1 PE=1 SV=2	22	17	23	8	949	104.6	5.06	44.41	94.8	97.1	98.1	109.3	103.2	97.5
P02452	Collagen alpha-1(I) chain OS=Homo sapiens OX=9606 GN=COL1A1 PE=1 SV=5	15	21	45	21	1464	138.9	5.8	68.85	129.8	79.9	73.6	75.5	79.8	161.4
P07195	L-lactate dehydrogenase B chain OS=Homo sapiens OX=9606 GN=LDHB PE=1 SV=2	41	15	51	14	334	36.6	6.05	102.09	104.7	90.2	98.9	90.7	123.1	92.3
P19971	Thymidine phosphorylase OS=Homo sapiens OX=9606 GN=TYMP PE=1 SV=2	33	12	22	12	482	49.9	5.53	51.89	91.8	89.9	114.7	124.6	86.8	92.3
P06702	Protein S100-A9 OS=Homo sapiens OX=9606 GN=S100A9 PE=1 SV=1	70	7	83	7	114	13.2	6.13	120.72	122.9	145.5	53.5	94.8	68.3	115
P07910	Heterogeneous nuclear ribonucleoproteins C1/C2 OS=Homo sapiens OX=9606 GN=HNRNPC PE=1 SV=4	29	13	35	13	306	33.7	5.08	58.96	95.6	82.8	136.3	81.7	121	82.6
P31146	Coronin-1A OS=Homo sapiens OX=9606 GN=CORO1A PE=1 SV=4	33	16	39	16	461	51	6.68	70.86	111	103.1	93.2	94	101.1	97.7
Q9Y2D5	A-kinase anchor protein 2 OS=Homo sapiens OX=9606 GN=AKAP2 PE=1 SV=3	27	22	33	22	859	94.6	5.11	33.3	125.3	132	69.2	109.5	70.5	93.5
P11766	Alcohol dehydrogenase class-3 OS=Homo sapiens OX=9606 GN=ADH5 PE=1 SV=4	33	13	48	13	374	39.7	7.49	78.81	94.9	89.3	128.8	86.8	116.4	83.8
Q9Y4L1	Hypoxia up-regulated protein 1 OS=Homo sapiens OX=9606 GN=HYOU1 PE=1 SV=1	21	20	34	20	999	111.3	5.22	45.18	89.5	78.6	135.8	84.7	128.2	83.3
Q96AE4	Far upstream element-binding protein 1 OS=Homo sapiens OX=9606 GN=FUBP1 PE=1 SV=3	37	19	36	15	644	67.5	7.61	63.79	95.2	86.6	139.2	83.4	109.5	86.1
Q16853	Membrane primary amine oxidase OS=Homo sapiens OX=9606 GN=AOC3 PE=1 SV=3	17	12	36	12	763	84.6	6.52	87.64	119.6	120.2	72.5	110.7	75.4	101.5
P05164	Myeloperoxidase OS=Homo sapiens OX=9606 GN=MPO PE=1 SV=1	34	20	35	17	745	83.8	8.97	57.58	114.9	128	64.2	102	70.7	120.3
Q15233	Non-POU domain-containing octamer-binding protein OS=Homo sapiens OX=9606 GN=NONO PE=1 SV=4	42	18	39	16	471	54.2	8.95	57.01	91.8	85.3	134	86.2	120.3	82.4
P12277	Creatine kinase B-type OS=Homo sapiens OX=9606 GN=CKB PE=1 SV=1	48	14	24	13	381	42.6	5.59	47.67	109.4	112.8	88.8	100.7	91.6	96.7
P53618	Coatomer subunit beta OS=Homo sapiens OX=9606 GN=COPB1 PE=1 SV=3	24	20	37	20	953	107.1	6.05	54.89	95.6	88.8	110.6	86.4	129.5	89
P35606	Coatomer subunit beta' OS=Homo sapiens OX=9606 GN=COPB2 PE=1 SV=2	29	22	32	22	906	102.4	5.27	47.76	97	83.9	113.1	82.5	135.3	88.1
Q02218	2-oxoglutarate dehydrogenase, mitochondrial OS=Homo sapiens OX=9606 GN=OGDH PE=1 SV=3	25	25	31	25	1023	115.9	6.86	40.5	97.6	87.6	125.3	83.8	118.6	87
P11171	Protein 4.1 OS=Homo sapiens OX=9606 GN=EPB41 PE=1 SV=4	26	19	39	17	864	97	5.58	47.21	82.1	117.5	85.9	123.6	78.7	112.2
P17655	Calpain-2 catalytic subunit OS=Homo sapiens OX=9606 GN=CAPN2 PE=1 SV=6	25	17	39	17	700	79.9	4.98	65.22	108.8	93	111	87.5	116	83.8
Q6P2Q9	Pre-mRNA-processing-splicing factor 8 OS=Homo sapiens OX=9606 GN=PRPF8 PE=1 SV=2	11	26	34	26	2335	273.4	8.84	48.66	97	92.4	113.4	88.1	117	92.1
Q92616	eIF-2-alpha kinase activator GCN1 OS=Homo sapiens OX=9606 GN=GCN1 PE=1 SV=6	10	26	32	26	2671	292.6	7.47	35.83	102.1	91.8	101.3	88.5	123.1	93.3
Q9Y3I0	RNA-splicing ligase RtcB homolog OS=Homo sapiens OX=9606 GN=RTCB PE=1 SV=1	40	18	35	18	505	55.2	7.23	62.73	102	93.7	113.1	89.1	112.6	89.5
Q13200	26S proteasome non-ATPase regulatory subunit 2 OS=Homo sapiens OX=9606 GN=PSMD2 PE=1 SV=3	23	21	26	21	908	100.1	5.2	38.05	98.5	90.9	114.6	89.2	117.1	89.7
Q93052	Lipoma-preferred partner OS=Homo sapiens OX=9606 GN=LPP PE=1 SV=1	39	16	33	16	612	65.7	7.37	48.9	115.1	97.1	94.1	100.5	97.5	95.7
P63010	AP-2 complex subunit beta OS=Homo sapiens OX=9606 GN=AP2B1 PE=1 SV=1	27	20	26	11	937	104.5	5.38	43.51	99.6	99	100.2	101.1	105.4	94.7
P51858	Hepatoma-derived growth factor OS=Homo sapiens OX=9606 GN=HDGF PE=1 SV=1	58	15	36	14	240	26.8	4.73	62.53	90.6	75.2	122	71.2	166.1	74.9
P49189	4-trimethylaminobutyraldehyde dehydrogenase OS=Homo sapiens OX=9606 GN=ALDH9A1 PE=1 SV=3	31	15	40	15	494	53.8	5.87	67.9	90.6	81.2	119.1	81.1	148.9	79
Q9UPQ0	LIM and calponin homology domains-containing protein 1 OS=Homo sapiens OX=9606 GN=LIMCH1 PE=1 SV=4	26	25	31	25	1083	121.8	6.47	47.69	117.3	116.1	92	100.4	83.3	90.9
Q02818	Nucleobindin-1 OS=Homo sapiens OX=9606 GN=NUCB1 PE=1 SV=4	46	18	27	18	461	53.8	5.25	48.28	103.2	94.6	98.5	91.7	124.9	87.1
P04264	Keratin, type II cytoskeletal 1 OS=Homo sapiens OX=9606 GN=KRT1 PE=1 SV=6	35	22	35	17	644	66	8.12	44.95	153.2	90.4	77	80.5	75.5	123.3
O75367	Core histone macro-H2A.1 OS=Homo sapiens OX=9606 GN=H2AFY PE=1 SV=4	33	10	31	10	372	39.6	9.79	63.26	87.5	89.3	126.4	91.7	111.7	93.5
P06744	Glucose-6-phosphate isomerase OS=Homo sapiens OX=9606 GN=GPI PE=1 SV=4	31	17	40	17	558	63.1	8.32	82.13	96.8	92.2	96.7	92.6	127	94.8
P42704	Leucine-rich PPR motif-containing protein, mitochondrial OS=Homo sapiens OX=9606 GN=LRPPRC PE=1 SV=3	18	24	29	24	1394	157.8	6.13	42.72	88.5	82.3	140.1	79.3	125.9	83.9
Q00341	Vigilin OS=Homo sapiens OX=9606 GN=HDLBP PE=1 SV=2	26	29	32	29	1268	141.4	6.87	35.75	99	83.3	111	83.5	135.6	87.6
P48735	Isocitrate dehydrogenase [NADP], mitochondrial OS=Homo sapiens OX=9606 GN=IDH2 PE=1 SV=2	42	18	32	18	452	50.9	8.69	62.13	82.9	74.1	150.3	78.7	136.4	77.6
P07384	Calpain-1 catalytic subunit OS=Homo sapiens OX=9606 GN=CAPN1 PE=1 SV=1	29	20	31	20	714	81.8	5.67	61.94	107.3	111.5	81.3	99.6	97.8	102.5
P21291	Cysteine and glycine-rich protein 1 OS=Homo sapiens OX=9606 GN=CSRP1 PE=1 SV=3	69	13	30	13	193	20.6	8.57	56.25	119.7	100.6	90.6	103.2	96.3	89.5
Q562R1	Beta-actin-like protein 2 OS=Homo sapiens OX=9606 GN=ACTBL2 PE=1 SV=2	19	8	263	1	376	42	5.59	403.15	107.5	98.2	96.3	98.7	103.3	96
Q9C0C2	182 kDa tankyrase-1-binding protein OS=Homo sapiens OX=9606 GN=TNKS1BP1 PE=1 SV=4	18	26	28	26	1729	181.7	4.86	35.52	102.1	102	111.1	92.4	101.6	90.9
O95782	AP-2 complex subunit alpha-1 OS=Homo sapiens OX=9606 GN=AP2A1 PE=1 SV=3	27	25	33	18	977	107.5	7.03	44.42	103.5	96.5	95.2	98.5	105.2	101.1
Q07954	Prolow-density lipoprotein receptor-related protein 1 OS=Homo sapiens OX=9606 GN=LRP1 PE=1 SV=2	6	25	30	25	4544	504.3	5.39	41.43	102.5	93.2	98.2	99.6	108.2	98.4
P49419	Alpha-aminoadipic semialdehyde dehydrogenase OS=Homo sapiens OX=9606 GN=ALDH7A1 PE=1 SV=5	32	15	22	15	539	58.5	7.99	47.25	93.4	86	163.5	83.9	97.4	75.9
P00326	Alcohol dehydrogenase 1C OS=Homo sapiens OX=9606 GN=ADH1C PE=1 SV=2	27	13	61	2	375	39.8	8.29	110.9	69.5	99.1	101.5	75.8	174.2	80
P00488	Coagulation factor XIII A chain OS=Homo sapiens OX=9606 GN=F13A1 PE=1 SV=4	25	15	27	15	732	83.2	6.09	53.41	100.1	85.1	111.1	91.2	108	104.6
P16152	Carbonyl reductase [NADPH] 1 OS=Homo sapiens OX=9606 GN=CBR1 PE=1 SV=3	54	11	21	9	277	30.4	8.32	54	102.3	95.2	108.5	99.4	107.6	87
O60814	Histone H2B type 1-K OS=Homo sapiens OX=9606 GN=H2BC12 PE=1 SV=3	65	10	222	2	126	13.9	10.32	292.27	101.9	96.6	114	92.5	105.4	89.6
Q9Y696	Chloride intracellular channel protein 4 OS=Homo sapiens OX=9606 GN=CLIC4 PE=1 SV=4	62	15	27	15	253	28.8	5.59	44.68	111.1	102.4	101.7	99.6	94.9	90.2
P11586	C-1-tetrahydrofolate synthase, cytoplasmic OS=Homo sapiens OX=9606 GN=MTHFD1 PE=1 SV=3	21	20	28	20	935	101.5	7.3	48	87.4	82.9	131.3	92.2	115.6	90.6
P42224	Signal transducer and activator of transcription 1-alpha/beta OS=Homo sapiens OX=9606 GN=STAT1 PE=1 SV=2	25	17	30	17	750	87.3	6.05	40.25	88.2	93.4	121.8	131.8	78.7	85.9
P52209	6-phosphogluconate dehydrogenase, decarboxylating OS=Homo sapiens OX=9606 GN=PGD PE=1 SV=3	30	13	37	13	483	53.1	7.23	65.94	90.8	87.8	136	91.4	108.5	85.5
P40925	Malate dehydrogenase, cytoplasmic OS=Homo sapiens OX=9606 GN=MDH1 PE=1 SV=4	43	14	41	14	334	36.4	7.36	61.48	95.1	90.9	106.1	98.3	113	96.5
P60660	Myosin light polypeptide 6 OS=Homo sapiens OX=9606 GN=MYL6 PE=1 SV=2	67	10	47	7	151	16.9	4.65	89.42	109.7	105.6	95.9	103	94.8	91.1
P23396	40S ribosomal protein S3 OS=Homo sapiens OX=9606 GN=RPS3 PE=1 SV=2	68	16	45	16	243	26.7	9.66	68.35	96.3	84.5	115.7	85.3	130.7	87.6
Q9Y678	Coatomer subunit gamma-1 OS=Homo sapiens OX=9606 GN=COPG1 PE=1 SV=1	23	17	27	16	874	97.7	5.47	41.3	101.2	83	109	81.1	138.3	87.3
P19823	Inter-alpha-trypsin inhibitor heavy chain H2 OS=Homo sapiens OX=9606 GN=ITIH2 PE=1 SV=2	23	21	35	21	946	106.4	6.86	59.34	73.9	95.7	75	127.2	84.6	143.6
P30153	Serine/threonine-protein phosphatase 2A 65 kDa regulatory subunit A alpha isoform OS=Homo sapiens OX=9606 GN=PPP2R1A PE=1 SV=4	34	16	26	15	589	65.3	5.11	53.15	98.1	97.9	101.9	95.5	114.1	92.5
Q16363	Laminin subunit alpha-4 OS=Homo sapiens OX=9606 GN=LAMA4 PE=1 SV=4	16	24	30	24	1823	202.4	6.28	44.96	127.8	137.9	61.3	112.2	59.6	101.1
Q96QK1	Vacuolar protein sorting-associated protein 35 OS=Homo sapiens OX=9606 GN=VPS35 PE=1 SV=2	26	18	27	18	796	91.6	5.49	54.34	108.8	96.3	104.9	96.2	104.1	89.8
Q9UM54	Unconventional myosin-VI OS=Homo sapiens OX=9606 GN=MYO6 PE=1 SV=4	20	22	29	22	1294	149.6	8.53	33.68	98.5	92.3	123.6	85.2	114.3	86
P60842	Eukaryotic initiation factor 4A-I OS=Homo sapiens OX=9606 GN=EIF4A1 PE=1 SV=1	36	14	28	7	406	46.1	5.48	53.99	104.6	81	98.3	93.7	134.8	87.6
P23526	Adenosylhomocysteinase OS=Homo sapiens OX=9606 GN=AHCY PE=1 SV=4	34	14	27	13	432	47.7	6.34	48.55	93.2	91.2	124.4	98	106	87.1
Q9NSE4	Isoleucine--tRNA ligase, mitochondrial OS=Homo sapiens OX=9606 GN=IARS2 PE=1 SV=2	20	17	26	17	1012	113.7	7.2	56.28	91.6	86.3	128	85.2	124.8	84.1
P07099	Epoxide hydrolase 1 OS=Homo sapiens OX=9606 GN=EPHX1 PE=1 SV=1	33	13	35	13	455	52.9	7.25	69.16	95.2	104.9	99.4	100.8	112.8	87
Q9NZN3	EH domain-containing protein 3 OS=Homo sapiens OX=9606 GN=EHD3 PE=1 SV=2	39	18	37	8	535	60.8	6.57	64.92	107.7	134.9	58.2	131.3	57.9	110.1
P09651	Heterogeneous nuclear ribonucleoprotein A1 OS=Homo sapiens OX=9606 GN=HNRNPA1 PE=1 SV=5	35	11	47	9	372	38.7	9.13	64.91	96.3	86	109.4	86.9	135.2	86.2
Q99832	T-complex protein 1 subunit eta OS=Homo sapiens OX=9606 GN=CCT7 PE=1 SV=2	41	19	30	19	543	59.3	7.65	47.37	98	98.1	105.6	99.3	97.8	101
P54819	Adenylate kinase 2, mitochondrial OS=Homo sapiens OX=9606 GN=AK2 PE=1 SV=2	59	12	33	12	239	26.5	7.81	64.52	85.7	74.1	170.9	76.1	114.6	78.7
P07954	Fumarate hydratase, mitochondrial OS=Homo sapiens OX=9606 GN=FH PE=1 SV=3	32	14	32	14	510	54.6	8.76	51	81.1	83.7	130.2	83.4	142.3	79.3
Q16778	Histone H2B type 2-E OS=Homo sapiens OX=9606 GN=HIST2H2BE PE=1 SV=3	65	10	206	2	126	13.9	10.32	276.58	109.9	100.8	119.2	92.3	95	82.8
O00151	PDZ and LIM domain protein 1 OS=Homo sapiens OX=9606 GN=PDLIM1 PE=1 SV=4	50	14	35	14	329	36	7.02	50.55	109.4	96.4	93.3	99.7	95.7	105.5
Q16822	Phosphoenolpyruvate carboxykinase [GTP], mitochondrial OS=Homo sapiens OX=9606 GN=PCK2 PE=1 SV=4	33	17	32	17	640	70.7	7.62	57.07	82.5	83.9	122.1	93.6	129	88.8
P05455	Lupus La protein OS=Homo sapiens OX=9606 GN=SSB PE=1 SV=2	43	21	34	21	408	46.8	7.12	45.2	98.1	88.9	129.8	83.6	114.8	84.8
Q5SSJ5	Heterochromatin protein 1-binding protein 3 OS=Homo sapiens OX=9606 GN=HP1BP3 PE=1 SV=1	32	16	36	16	553	61.2	9.67	58.51	93.7	90.3	140.7	83.3	110.1	81.9
Q14240	Eukaryotic initiation factor 4A-II OS=Homo sapiens OX=9606 GN=EIF4A2 PE=1 SV=2	36	15	27	8	407	46.4	5.48	46.22	103.6	96.1	114.7	94.2	101.8	89.7
P08758	Annexin A5 OS=Homo sapiens OX=9606 GN=ANXA5 PE=1 SV=2	41	16	63	15	320	35.9	5.05	114.35	99.3	83	142.6	93.8	94.2	87.1
Q9UGT4	Sushi domain-containing protein 2 OS=Homo sapiens OX=9606 GN=SUSD2 PE=1 SV=1	26	15	27	15	822	90.2	6.28	53.08	128.7	110.6	84.4	106	89.2	81.2
O94760	N(G),N(G)-dimethylarginine dimethylaminohydrolase 1 OS=Homo sapiens OX=9606 GN=DDAH1 PE=1 SV=3	61	16	34	15	285	31.1	5.81	58.07	84	86.8	165.7	75.8	110.4	77.3
Q92945	Far upstream element-binding protein 2 OS=Homo sapiens OX=9606 GN=KHSRP PE=1 SV=4	34	21	32	17	711	73.1	7.3	58.46	97.1	87.9	120.6	86.7	118.6	89.1
P07585	Decorin OS=Homo sapiens OX=9606 GN=DCN PE=1 SV=1	34	12	57	11	359	39.7	8.54	109.31	98.3	101.8	56.5	93.8	70.5	179
A8TX70	Collagen alpha-5(VI) chain OS=Homo sapiens OX=9606 GN=COL6A5 PE=1 SV=1	8	22	30	20	2615	289.7	6.95	39.14	131.5	119.4	70.9	128.9	59	90.3
O60506	Heterogeneous nuclear ribonucleoprotein Q OS=Homo sapiens OX=9606 GN=SYNCRIP PE=1 SV=2	33	18	29	12	623	69.6	8.59	47.27	109.9	87	110.1	93.5	112.7	86.7
P19367	Hexokinase-1 OS=Homo sapiens OX=9606 GN=HK1 PE=1 SV=3	21	21	29	21	917	102.4	6.8	46.47	104.3	88.7	109.7	88.9	117.9	90.5
P22695	Cytochrome b-c1 complex subunit 2, mitochondrial OS=Homo sapiens OX=9606 GN=UQCRC2 PE=1 SV=3	32	12	26	12	453	48.4	8.63	55.5	102	95.2	115.9	91.8	106.4	88.6
Q9BW04	Specifically androgen-regulated gene protein OS=Homo sapiens OX=9606 GN=SARG PE=1 SV=2	33	13	27	13	601	63.9	8.62	33.66	95.8	71.9	96.3	67.9	183.5	84.6
Q04637	Eukaryotic translation initiation factor 4 gamma 1 OS=Homo sapiens OX=9606 GN=EIF4G1 PE=1 SV=4	16	22	30	22	1599	175.4	5.33	26.15	105.9	83.6	115.9	81.1	132.2	81.3
P02649	Apolipoprotein E OS=Homo sapiens OX=9606 GN=APOE PE=1 SV=1	51	18	30	18	317	36.1	5.73	60.2	91.5	110	77.7	121.9	71	128
P50995	Annexin A11 OS=Homo sapiens OX=9606 GN=ANXA11 PE=1 SV=1	34	15	30	15	505	54.4	7.65	45.74	102.7	103.4	101.9	94.1	102.2	95.7
Q7Z6Z7	E3 ubiquitin-protein ligase HUWE1 OS=Homo sapiens OX=9606 GN=HUWE1 PE=1 SV=3	7	26	27	26	4374	481.6	5.22	29.9	94.9	98.6	115	87.3	111.5	92.7
P23142	Fibulin-1 OS=Homo sapiens OX=9606 GN=FBLN1 PE=1 SV=4	27	16	28	16	703	77.2	5.22	48.83	111.1	102	102	93.2	77	114.7
P14868	Aspartate--tRNA ligase, cytoplasmic OS=Homo sapiens OX=9606 GN=DARS PE=1 SV=2	40	18	26	18	501	57.1	6.55	40.37	94.1	92.2	117.8	91	113.4	91.5
P14314	Glucosidase 2 subunit beta OS=Homo sapiens OX=9606 GN=PRKCSH PE=1 SV=2	33	16	29	16	528	59.4	4.41	47.91	90.6	88.2	119.9	88.7	120.1	92.4
Q14573	Inositol 1,4,5-trisphosphate receptor type 3 OS=Homo sapiens OX=9606 GN=ITPR3 PE=1 SV=2	11	29	33	22	2671	303.9	6.48	29.69	87	87.7	109.5	79.9	149.6	86.2
B9A064	Immunoglobulin lambda-like polypeptide 5 OS=Homo sapiens OX=9606 GN=IGLL5 PE=2 SV=2	38	7	67	3	214	23	8.84	153.78	90.8	108.2	73.3	107.1	83.9	136.7
Q14974	Importin subunit beta-1 OS=Homo sapiens OX=9606 GN=KPNB1 PE=1 SV=2	22	17	26	17	876	97.1	4.78	48.54	96	97.3	104	103.1	103	96.6
P50570	Dynamin-2 OS=Homo sapiens OX=9606 GN=DNM2 PE=1 SV=2	20	15	24	15	870	98	7.44	44.06	103	101	92.6	101.7	105.9	95.8
Q04917	14-3-3 protein eta OS=Homo sapiens OX=9606 GN=YWHAH PE=1 SV=4	43	12	40	9	246	28.2	4.84	63.9	103.7	93.8	111.3	83.3	127	81
P17858	ATP-dependent 6-phosphofructokinase, liver type OS=Homo sapiens OX=9606 GN=PFKL PE=1 SV=6	24	15	23	10	780	85	7.5	41.22	101.4	99.8	101.2	99.8	99	98.8
P26641	Elongation factor 1-gamma OS=Homo sapiens OX=9606 GN=EEF1G PE=1 SV=3	26	15	27	15	437	50.1	6.67	36.75	98	84.9	120.3	86.1	122.3	88.4
Q13435	Splicing factor 3B subunit 2 OS=Homo sapiens OX=9606 GN=SF3B2 PE=1 SV=2	22	20	28	20	895	100.2	5.67	35.04	100.2	86.2	124.9	84.2	118.1	86.4
Q16851	UTP--glucose-1-phosphate uridylyltransferase OS=Homo sapiens OX=9606 GN=UGP2 PE=1 SV=5	30	14	33	14	508	56.9	8.15	49.68	97.7	98	100.4	98.3	110.6	95
O94979	Protein transport protein Sec31A OS=Homo sapiens OX=9606 GN=SEC31A PE=1 SV=3	17	19	28	19	1220	132.9	6.89	30.77	92.9	92.1	108.8	92.6	121.2	92.4
Q15019	Septin-2 OS=Homo sapiens OX=9606 GN=SEPTIN2 PE=1 SV=1	41	13	28	13	361	41.5	6.6	40.33	109.4	99.9	108.5	96	94	92.2
Q8NBS9	Thioredoxin domain-containing protein 5 OS=Homo sapiens OX=9606 GN=TXNDC5 PE=1 SV=2	34	15	31	15	432	47.6	5.97	53.26	91.7	65.4	137.4	67	156.2	82.3
O43852	Calumenin OS=Homo sapiens OX=9606 GN=CALU PE=1 SV=2	54	15	31	15	315	37.1	4.64	62.81	85.9	72.8	154.4	72.3	133.5	81
O95336	6-phosphogluconolactonase OS=Homo sapiens OX=9606 GN=PGLS PE=1 SV=2	51	9	22	9	258	27.5	6.05	53.29	97.5	95.2	108.6	105.7	101.4	91.5
Q14152	Eukaryotic translation initiation factor 3 subunit A OS=Homo sapiens OX=9606 GN=EIF3A PE=1 SV=1	21	25	29	25	1382	166.5	6.79	47.11	99.4	96.9	105.4	96.4	110	91.9
P58107	Epiplakin OS=Homo sapiens OX=9606 GN=EPPK1 PE=1 SV=3	19	21	26	15	5088	555.3	5.62	35.85	112.5	105.8	90.9	94	102.2	94.6
P13804	Electron transfer flavoprotein subunit alpha, mitochondrial OS=Homo sapiens OX=9606 GN=ETFA PE=1 SV=1	39	10	23	10	333	35.1	8.38	44.51	96.3	83.1	142.1	84.1	111.9	82.4
Q14847	LIM and SH3 domain protein 1 OS=Homo sapiens OX=9606 GN=LASP1 PE=1 SV=2	48	15	36	15	261	29.7	7.05	55.23	120.3	95.5	118.6	87.8	95.2	82.5
O15144	Actin-related protein 2/3 complex subunit 2 OS=Homo sapiens OX=9606 GN=ARPC2 PE=1 SV=1	40	13	39	13	300	34.3	7.36	59.32	103.9	95	103	98.7	105.6	93.7
Q13753	Laminin subunit gamma-2 OS=Homo sapiens OX=9606 GN=LAMC2 PE=1 SV=2	18	21	25	21	1193	130.9	6.19	49.04	147.3	126.6	63.6	107.9	59.2	95.4
Q9NR45	Sialic acid synthase OS=Homo sapiens OX=9606 GN=NANS PE=1 SV=2	44	14	26	14	359	40.3	6.74	49.26	108.2	72.6	126.4	75.3	134.8	82.7
Q02252	Methylmalonate-semialdehyde dehydrogenase [acylating], mitochondrial OS=Homo sapiens OX=9606 GN=ALDH6A1 PE=1 SV=2	36	16	30	16	535	57.8	8.5	58.07	81.6	83	160.4	89.4	103	82.6
P43243	Matrin-3 OS=Homo sapiens OX=9606 GN=MATR3 PE=1 SV=2	25	18	25	18	847	94.6	6.25	37.75	95.4	93.4	130.2	89.2	107.3	84.5
Q15365	Poly(rC)-binding protein 1 OS=Homo sapiens OX=9606 GN=PCBP1 PE=1 SV=2	38	10	26	5	356	37.5	7.09	61.31	101.9	90.6	112.2	93.2	113.4	88.7
P24752	Acetyl-CoA acetyltransferase, mitochondrial OS=Homo sapiens OX=9606 GN=ACAT1 PE=1 SV=1	33	13	29	13	427	45.2	8.85	49.97	91.9	76.9	139.4	87.2	122	82.6
P51608	Methyl-CpG-binding protein 2 OS=Homo sapiens OX=9606 GN=MECP2 PE=1 SV=1	40	16	22	16	486	52.4	9.95	35.17	101.8	91.8	127.7	90.1	97.1	91.6
P17987	T-complex protein 1 subunit alpha OS=Homo sapiens OX=9606 GN=TCP1 PE=1 SV=1	34	17	32	17	556	60.3	6.11	48.34	97.7	96.9	110.6	96.2	100.1	98.6
Q01469	Fatty acid-binding protein 5 OS=Homo sapiens OX=9606 GN=FABP5 PE=1 SV=3	59	9	25	9	135	15.2	7.01	58.59	147	123.2	66.5	98.9	77.7	86.7
Q13751	Laminin subunit beta-3 OS=Homo sapiens OX=9606 GN=LAMB3 PE=1 SV=1	23	21	25	21	1172	129.5	7.21	41.86	157	134	65.5	97	61.2	85.4
P61981	14-3-3 protein gamma OS=Homo sapiens OX=9606 GN=YWHAG PE=1 SV=2	43	11	45	7	247	28.3	4.89	75.4	107.3	90.2	116.9	89.8	113.2	82.6
Q99497	Protein/nucleic acid deglycase DJ-1 OS=Homo sapiens OX=9606 GN=PARK7 PE=1 SV=2	45	11	44	11	189	19.9	6.79	76.51	91	83	146.6	83.5	108.6	87.2
P35232	Prohibitin OS=Homo sapiens OX=9606 GN=PHB PE=1 SV=1	50	14	27	14	272	29.8	5.76	52.25	93.7	96.1	119.9	92.2	109.4	88.7
P40121	Macrophage-capping protein OS=Homo sapiens OX=9606 GN=CAPG PE=1 SV=2	30	9	34	9	348	38.5	6.19	70.46	91	75.6	110.5	115.9	110.2	96.8
Q13263	Transcription intermediary factor 1-beta OS=Homo sapiens OX=9606 GN=TRIM28 PE=1 SV=5	20	14	23	14	835	88.5	5.77	45.92	95	80.6	119.7	80.7	146.3	77.7
O94832	Unconventional myosin-Id OS=Homo sapiens OX=9606 GN=MYO1D PE=1 SV=2	22	21	28	21	1006	116.1	9.39	34.08	99	95	107.4	101.1	100.7	96.8
O75643	U5 small nuclear ribonucleoprotein 200 kDa helicase OS=Homo sapiens OX=9606 GN=SNRNP200 PE=1 SV=2	12	22	27	22	2136	244.4	6.06	36.2	94.9	91.7	123.5	86.6	117	86.3
Q9BUJ2	Heterogeneous nuclear ribonucleoprotein U-like protein 1 OS=Homo sapiens OX=9606 GN=HNRNPUL1 PE=1 SV=2	25	16	22	16	856	95.7	6.92	35.24	97.2	107.6	106.6	90.5	109.9	88.1
P16284	Platelet endothelial cell adhesion molecule OS=Homo sapiens OX=9606 GN=PECAM1 PE=1 SV=2	27	16	21	16	738	82.5	6.99	44.68	119.3	133.1	68	116.3	69.5	93.7
P51572	B-cell receptor-associated protein 31 OS=Homo sapiens OX=9606 GN=BCAP31 PE=1 SV=3	41	15	33	15	246	28	8.44	51.23	98.5	82.9	136	89.5	106.6	86.4
Q9UQE7	Structural maintenance of chromosomes protein 3 OS=Homo sapiens OX=9606 GN=SMC3 PE=1 SV=2	19	22	25	22	1217	141.5	7.18	28.71	94	96.1	114.3	95.9	108.8	90.9
Q9BX66	Sorbin and SH3 domain-containing protein 1 OS=Homo sapiens OX=9606 GN=SORBS1 PE=1 SV=3	18	19	25	19	1292	142.4	6.84	31.46	109.8	115.8	79.3	110.9	89.2	95.1
P30044	Peroxiredoxin-5, mitochondrial OS=Homo sapiens OX=9606 GN=PRDX5 PE=1 SV=4	56	10	36	10	214	22.1	8.7	75.7	88.4	90.8	141.2	83	119.7	76.9
O00299	Chloride intracellular channel protein 1 OS=Homo sapiens OX=9606 GN=CLIC1 PE=1 SV=4	58	11	25	11	241	26.9	5.17	50.82	100.5	94.9	97.7	93.5	121	92.4
P04899	Guanine nucleotide-binding protein G(i) subunit alpha-2 OS=Homo sapiens OX=9606 GN=GNAI2 PE=1 SV=3	39	12	27	7	355	40.4	5.54	53.55	109.7	106.7	90.8	103.5	93.3	96
Q92896	Golgi apparatus protein 1 OS=Homo sapiens OX=9606 GN=GLG1 PE=1 SV=2	20	20	23	20	1179	134.5	6.9	29.29	98.4	84.1	138	81	113.9	84.6
P19827	Inter-alpha-trypsin inhibitor heavy chain H1 OS=Homo sapiens OX=9606 GN=ITIH1 PE=1 SV=3	15	11	21	11	911	101.3	6.79	42.74	73.5	83.2	81.3	134.2	80.3	147.5
P47756	F-actin-capping protein subunit beta OS=Homo sapiens OX=9606 GN=CAPZB PE=1 SV=4	45	12	33	12	277	31.3	5.59	66.08	102.3	90	118.7	95.1	101.5	92.4
Q96CX2	BTB/POZ domain-containing protein KCTD12 OS=Homo sapiens OX=9606 GN=KCTD12 PE=1 SV=1	42	12	26	12	325	35.7	5.64	48.38	104.1	102.8	89.6	123.5	80	100
P51991	Heterogeneous nuclear ribonucleoprotein A3 OS=Homo sapiens OX=9606 GN=HNRNPA3 PE=1 SV=2	31	11	25	11	378	39.6	9.01	31.45	96.1	85.3	126.1	88.2	112.3	92
P49792	E3 SUMO-protein ligase RanBP2 OS=Homo sapiens OX=9606 GN=RANBP2 PE=1 SV=2	10	23	27	20	3224	358	6.2	23.19	97.5	93.5	125.4	86.6	112	84.9
P56199	Integrin alpha-1 OS=Homo sapiens OX=9606 GN=ITGA1 PE=1 SV=2	19	24	37	24	1179	130.8	6.29	35.38	117.8	117.6	78.8	108.1	81.7	96
P49588	Alanine--tRNA ligase, cytoplasmic OS=Homo sapiens OX=9606 GN=AARS PE=1 SV=2	20	18	27	18	968	106.7	5.53	36.2	96.5	89.9	125.5	89.3	108	90.7
O94973	AP-2 complex subunit alpha-2 OS=Homo sapiens OX=9606 GN=AP2A2 PE=1 SV=2	21	17	22	10	939	103.9	6.96	36.01	92.2	87.8	119.7	95	110.7	94.6
O75533	Splicing factor 3B subunit 1 OS=Homo sapiens OX=9606 GN=SF3B1 PE=1 SV=3	21	22	24	22	1304	145.7	7.09	26.47	93.8	92.4	124.9	88.3	114.7	86
Q32MZ4	Leucine-rich repeat flightless-interacting protein 1 OS=Homo sapiens OX=9606 GN=LRRFIP1 PE=1 SV=2	21	15	20	14	808	89.2	4.65	37.3	105.8	94.9	108.5	95.9	106.1	88.8
Q9NYL9	Tropomodulin-3 OS=Homo sapiens OX=9606 GN=TMOD3 PE=1 SV=1	42	16	27	14	352	39.6	5.19	52.48	115.1	97.6	101.4	95.2	104.3	86.4
P25311	Zinc-alpha-2-glycoprotein OS=Homo sapiens OX=9606 GN=AZGP1 PE=1 SV=2	46	14	22	14	298	34.2	6.05	43.57	96.2	123.8	66	121.4	65.1	127.5
Q12906	Interleukin enhancer-binding factor 3 OS=Homo sapiens OX=9606 GN=ILF3 PE=1 SV=3	21	18	30	16	894	95.3	8.76	47.78	98.4	84	124.3	88.8	122.9	81.5
O96009	Napsin-A OS=Homo sapiens OX=9606 GN=NAPSA PE=1 SV=1	17	8	43	8	420	45.4	6.61	75.25	68	58.8	193.7	59.8	152.9	66.8
P49591	Serine--tRNA ligase, cytoplasmic OS=Homo sapiens OX=9606 GN=SARS PE=1 SV=3	40	18	25	18	514	58.7	6.43	35.86	99.1	89.9	123.6	92.1	104.9	90.4
P35609	Alpha-actinin-2 OS=Homo sapiens OX=9606 GN=ACTN2 PE=1 SV=1	15	13	36	2	894	103.8	5.45	61.39	117.8	123.5	87.6	113.8	67.5	89.8
Q14767	Latent-transforming growth factor beta-binding protein 2 OS=Homo sapiens OX=9606 GN=LTBP2 PE=1 SV=3	14	18	25	17	1821	194.9	5.19	30.71	90.1	80.8	132	82.4	106.8	108
Q13561	Dynactin subunit 2 OS=Homo sapiens OX=9606 GN=DCTN2 PE=1 SV=4	44	13	19	13	401	44.2	5.21	39.21	108.1	99.6	97.7	97.6	101	96
P00387	NADH-cytochrome b5 reductase 3 OS=Homo sapiens OX=9606 GN=CYB5R3 PE=1 SV=3	35	10	28	10	301	34.2	7.59	55.28	102.4	92.2	111.4	104	95.6	94.4
P0DOY2	Immunoglobulin lambda constant 2 OS=Homo sapiens OX=9606 GN=IGLC2 PE=1 SV=1	70	6	102	2	106	11.3	7.24	228.17	86.2	110.3	61.4	112.8	82.4	146.9
Q08257	Quinone oxidoreductase OS=Homo sapiens OX=9606 GN=CRYZ PE=1 SV=1	38	12	33	12	329	35.2	8.44	61.19	85.4	77.7	199.6	70.6	97.3	69.3
P46459	Vesicle-fusing ATPase OS=Homo sapiens OX=9606 GN=NSF PE=1 SV=3	21	17	31	16	744	82.5	6.95	46.59	99.4	83	127.4	84.2	118.9	87.1
P00568	Adenylate kinase isoenzyme 1 OS=Homo sapiens OX=9606 GN=AK1 PE=1 SV=3	65	12	26	12	194	21.6	8.63	48.89	88.3	98.8	97.7	92.6	137.5	85.1
Q9NYU2	UDP-glucose:glycoprotein glucosyltransferase 1 OS=Homo sapiens OX=9606 GN=UGGT1 PE=1 SV=3	14	20	25	20	1555	177.1	5.63	35.99	93.2	91.2	117.2	94.5	114.2	89.8
Q9Y6C2	EMILIN-1 OS=Homo sapiens OX=9606 GN=EMILIN1 PE=1 SV=3	22	16	23	16	1016	106.6	5.17	45.32	115.1	100.1	85	106.9	78.1	114.8
P02749	Beta-2-glycoprotein 1 OS=Homo sapiens OX=9606 GN=APOH PE=1 SV=3	45	12	24	12	345	38.3	7.97	38.41	95.7	105	78.5	115.6	79.7	125.7
P80723	Brain acid soluble protein 1 OS=Homo sapiens OX=9606 GN=BASP1 PE=1 SV=2	79	11	19	11	227	22.7	4.63	27.12	101.3	87.8	88	85.1	123.1	114.8
O43242	26S proteasome non-ATPase regulatory subunit 3 OS=Homo sapiens OX=9606 GN=PSMD3 PE=1 SV=2	30	15	20	15	534	60.9	8.44	36.55	96.4	90	120.1	91.6	113.7	88.1
O75116	Rho-associated protein kinase 2 OS=Homo sapiens OX=9606 GN=ROCK2 PE=1 SV=4	16	21	26	19	1388	160.8	6.02	33.3	111.3	102.4	91.8	95.1	101.8	97.6
P60903	Protein S100-A10 OS=Homo sapiens OX=9606 GN=S100A10 PE=1 SV=2	46	5	51	5	97	11.2	7.37	85.05	139.5	123.5	64.3	112.6	62	98.1
P31946	14-3-3 protein beta/alpha OS=Homo sapiens OX=9606 GN=YWHAB PE=1 SV=3	41	10	48	4	246	28.1	4.83	62.8	104.5	97.5	100.1	96.1	107.8	93.9
P54578	Ubiquitin carboxyl-terminal hydrolase 14 OS=Homo sapiens OX=9606 GN=USP14 PE=1 SV=3	29	16	23	16	494	56	5.3	37.93	94.3	100.7	104	104.4	98	98.6
Q15418	Ribosomal protein S6 kinase alpha-1 OS=Homo sapiens OX=9606 GN=RPS6KA1 PE=1 SV=2	26	16	22	10	735	82.7	7.83	30.87	90.8	96.2	130.2	92.9	98.7	91.2
P61160	Actin-related protein 2 OS=Homo sapiens OX=9606 GN=ACTR2 PE=1 SV=1	27	9	27	9	394	44.7	6.74	59.3	99.2	96.3	96.3	105.4	100.4	102.4
P10301	Ras-related protein R-Ras OS=Homo sapiens OX=9606 GN=RRAS PE=1 SV=1	56	11	30	9	218	23.5	6.93	35.93	118.1	121	72.9	113	79.7	95.3
P62424	60S ribosomal protein L7a OS=Homo sapiens OX=9606 GN=RPL7A PE=1 SV=2	38	12	22	12	266	30	10.61	48.94	100.9	83.8	118.5	89.4	118.4	89
Q8NC51	Plasminogen activator inhibitor 1 RNA-binding protein OS=Homo sapiens OX=9606 GN=SERBP1 PE=1 SV=2	29	14	23	14	408	44.9	8.65	37.53	102.2	79.8	129.7	78.9	123.6	85.8
O15247	Chloride intracellular channel protein 2 OS=Homo sapiens OX=9606 GN=CLIC2 PE=1 SV=3	47	11	19	11	247	28.3	5.59	34.01	113.8	115.4	81.9	116.6	74.5	97.8
Q14624	Inter-alpha-trypsin inhibitor heavy chain H4 OS=Homo sapiens OX=9606 GN=ITIH4 PE=1 SV=4	17	13	22	13	930	103.3	6.98	44.66	79.3	106.4	78.4	128.9	77.5	129.6
P05155	Plasma protease C1 inhibitor OS=Homo sapiens OX=9606 GN=SERPING1 PE=1 SV=2	20	10	25	10	500	55.1	6.55	50.27	86.6	116.6	62.8	121.9	77.1	134.9
P63244	Receptor of activated protein C kinase 1 OS=Homo sapiens OX=9606 GN=RACK1 PE=1 SV=3	47	13	30	13	317	35.1	7.69	51.72	100	87.7	113.9	86.6	124.3	87.5
P29966	Myristoylated alanine-rich C-kinase substrate OS=Homo sapiens OX=9606 GN=MARCKS PE=1 SV=4	34	7	24	7	332	31.5	4.45	46.36	114.9	107.5	85.9	119.4	77.6	94.6
P05388	60S acidic ribosomal protein P0 OS=Homo sapiens OX=9606 GN=RPLP0 PE=1 SV=1	36	9	20	9	317	34.3	5.97	49.81	100.9	84.1	112.1	86.1	133.4	83.5
O60763	General vesicular transport factor p115 OS=Homo sapiens OX=9606 GN=USO1 PE=1 SV=2	17	16	22	16	962	107.8	4.91	29.11	93	89	117.7	90.9	123.5	85.9
Q8IWL1	Pulmonary surfactant-associated protein A2 OS=Homo sapiens OX=9606 GN=SFTPA2 PE=1 SV=1	38	9	35	9	248	26.2	5.17	82.14	106.9	110.8	51.8	110.8	83.7	136
P05141	ADP/ATP translocase 2 OS=Homo sapiens OX=9606 GN=SLC25A5 PE=1 SV=7	32	12	33	5	298	32.8	9.69	57.86	91.5	71.9	163	75.4	119.1	79.1
Q13177	Serine/threonine-protein kinase PAK 2 OS=Homo sapiens OX=9606 GN=PAK2 PE=1 SV=3	38	15	20	15	524	58	5.96	33.9	96.9	111.5	92.3	111.6	87.9	99.8
P51888	Prolargin OS=Homo sapiens OX=9606 GN=PRELP PE=1 SV=1	34	11	37	11	382	43.8	9.38	77.04	105.7	110.6	68	108	75.8	131.9
P13647	Keratin, type II cytoskeletal 5 OS=Homo sapiens OX=9606 GN=KRT5 PE=1 SV=3	28	19	32	10	590	62.3	7.74	50.38	107.5	160	88.2	66	98.6	79.7
P61916	NPC intracellular cholesterol transporter 2 OS=Homo sapiens OX=9606 GN=NPC2 PE=1 SV=1	44	6	27	6	151	16.6	7.65	55.61	85.8	61.8	116.9	73.3	187.6	74.6
P08575	Receptor-type tyrosine-protein phosphatase C OS=Homo sapiens OX=9606 GN=PTPRC PE=1 SV=3	15	17	25	17	1306	147.4	6.15	35.67	101.7	101.5	90.2	104.2	95.3	107.1
Q9UJU6	Drebrin-like protein OS=Homo sapiens OX=9606 GN=DBNL PE=1 SV=1	42	16	22	16	430	48.2	5.05	33.61	99.3	95.7	121.1	85.4	110.5	88.1
P06737	Glycogen phosphorylase, liver form OS=Homo sapiens OX=9606 GN=PYGL PE=1 SV=4	24	20	27	15	847	97.1	7.17	40.56	98.7	102.9	103.4	84.7	114.9	95.3
P24844	Myosin regulatory light polypeptide 9 OS=Homo sapiens OX=9606 GN=MYL9 PE=1 SV=4	51	9	37	3	172	19.8	4.92	58.83	108.1	111.5	91	102.9	87.5	99
Q13576	Ras GTPase-activating-like protein IQGAP2 OS=Homo sapiens OX=9606 GN=IQGAP2 PE=1 SV=4	14	19	24	19	1575	180.5	5.64	26.94	94.3	88.4	123.6	103.5	91.8	98.5
Q9HC35	Echinoderm microtubule-associated protein-like 4 OS=Homo sapiens OX=9606 GN=EML4 PE=1 SV=3	21	18	24	18	981	108.8	6.4	32.17	106.4	81.7	116.6	88.1	118.7	88.4
P10909	Clusterin OS=Homo sapiens OX=9606 GN=CLU PE=1 SV=1	29	12	21	12	449	52.5	6.27	33.1	97.2	109.1	80.1	116.3	75.9	121.3
Q9UHD8	Septin-9 OS=Homo sapiens OX=9606 GN=SEPTIN9 PE=1 SV=2	30	15	21	15	586	65.4	8.97	45.94	98.5	91.5	114	100.5	94.5	101.1
Q9UQ80	Proliferation-associated protein 2G4 OS=Homo sapiens OX=9606 GN=PA2G4 PE=1 SV=3	34	12	23	12	394	43.8	6.55	41.62	96.1	94.9	100.9	96.8	116.4	94.9
Q9NZA1	Chloride intracellular channel protein 5 OS=Homo sapiens OX=9606 GN=CLIC5 PE=1 SV=3	37	10	18	9	410	46.5	4.82	36.68	133.2	123.5	65.1	94.8	82.2	101.1
Q14254	Flotillin-2 OS=Homo sapiens OX=9606 GN=FLOT2 PE=1 SV=2	26	11	20	11	428	47	5.25	34.82	91.8	95.7	122.5	95.7	107.3	87
P78417	Glutathione S-transferase omega-1 OS=Homo sapiens OX=9606 GN=GSTO1 PE=1 SV=2	41	15	33	15	241	27.5	6.6	44.53	98.3	99.1	91.5	114	98.2	98.9
P31939	Bifunctional purine biosynthesis protein PURH OS=Homo sapiens OX=9606 GN=ATIC PE=1 SV=3	26	13	20	13	592	64.6	6.71	36.58	90.1	92.9	108.4	108.5	101.4	98.8
P18124	60S ribosomal protein L7 OS=Homo sapiens OX=9606 GN=RPL7 PE=1 SV=1	33	11	23	11	248	29.2	10.65	47.24	96.6	86.4	115.1	86.4	129.4	86.1
P05109	Protein S100-A8 OS=Homo sapiens OX=9606 GN=S100A8 PE=1 SV=1	71	13	50	13	93	10.8	7.03	88.52	132.7	154.7	52.5	86.9	65.9	107.2
P43652	Afamin OS=Homo sapiens OX=9606 GN=AFM PE=1 SV=1	28	16	24	16	599	69	5.9	32.85	106.5	119.6	73	111.3	72.3	117.3
P15121	Aldo-keto reductase family 1 member B1 OS=Homo sapiens OX=9606 GN=AKR1B1 PE=1 SV=3	49	13	30	13	316	35.8	6.98	47.63	85.6	78.7	116.1	113.4	103.8	102.4
O14950	Myosin regulatory light chain 12B OS=Homo sapiens OX=9606 GN=MYL12B PE=1 SV=2	51	8	39	2	172	19.8	4.84	67.29	104.8	96.7	112.5	90.4	107.6	88
Q15046	Lysine--tRNA ligase OS=Homo sapiens OX=9606 GN=KARS1 PE=1 SV=3	27	16	27	16	597	68	6.35	32.75	92.3	92.2	126	99.5	92.6	97.4
P62879	Guanine nucleotide-binding protein G(I)/G(S)/G(T) subunit beta-2 OS=Homo sapiens OX=9606 GN=GNB2 PE=1 SV=3	28	9	35	3	340	37.3	6	61.49	111.4	90.6	100.7	95.8	110.6	90.9
O60610	Protein diaphanous homolog 1 OS=Homo sapiens OX=9606 GN=DIAPH1 PE=1 SV=2	16	18	23	18	1272	141.3	5.41	44.49	94.1	90.2	128.3	89.9	107	90.5
P11413	Glucose-6-phosphate 1-dehydrogenase OS=Homo sapiens OX=9606 GN=G6PD PE=1 SV=4	36	17	28	17	515	59.2	6.84	53.36	98.5	98.2	116.3	99.8	92.1	95.1
Q16181	Septin-7 OS=Homo sapiens OX=9606 GN=SEPTIN7 PE=1 SV=2	35	16	35	15	437	50.6	8.63	47.36	106.2	98.4	102.4	101.1	93.8	98.2
P21399	Cytoplasmic aconitate hydratase OS=Homo sapiens OX=9606 GN=ACO1 PE=1 SV=3	21	18	21	18	889	98.3	6.68	30.32	98.5	83.5	125.2	82.7	123.7	86.4
Q15459	Splicing factor 3A subunit 1 OS=Homo sapiens OX=9606 GN=SF3A1 PE=1 SV=1	23	15	23	15	793	88.8	5.22	26.36	95.7	89.5	124.3	89.6	113.1	87.7
Q14247	Src substrate cortactin OS=Homo sapiens OX=9606 GN=CTTN PE=1 SV=2	35	18	24	18	550	61.5	5.4	33.47	107.8	85.3	134.3	85.5	98.4	88.6
P48444	Coatomer subunit delta OS=Homo sapiens OX=9606 GN=ARCN1 PE=1 SV=1	33	18	25	18	511	57.2	6.21	30.16	98	82.5	120.9	82.3	133.7	82.7
P09972	Fructose-bisphosphate aldolase C OS=Homo sapiens OX=9606 GN=ALDOC PE=1 SV=2	25	9	21	5	364	39.4	6.87	47.91	101.1	96.2	106.3	100.1	103.2	93.2
Q9H2G2	STE20-like serine/threonine-protein kinase OS=Homo sapiens OX=9606 GN=SLK PE=1 SV=1	19	21	24	20	1235	142.6	5.15	26.85	103	101.9	94.2	96.9	102.5	101.6
P04004	Vitronectin OS=Homo sapiens OX=9606 GN=VTN PE=1 SV=1	24	10	36	10	478	54.3	5.8	51.68	99.8	104.3	86.4	115	79.2	115.4
Q709C8	Vacuolar protein sorting-associated protein 13C OS=Homo sapiens OX=9606 GN=VPS13C PE=1 SV=1	7	21	22	21	3753	422.1	6.83	30.46	101.5	92.4	99.9	100.1	110.3	95.9
P49257	Protein ERGIC-53 OS=Homo sapiens OX=9606 GN=LMAN1 PE=1 SV=2	27	13	21	13	510	57.5	6.77	35.19	90	83.2	102.4	83	153.1	88.3
Q96G03	Phosphoglucomutase-2 OS=Homo sapiens OX=9606 GN=PGM2 PE=1 SV=4	30	19	26	19	612	68.2	6.73	40.01	113.2	101	97.1	102.3	93.5	92.8
P05026	Sodium/potassium-transporting ATPase subunit beta-1 OS=Homo sapiens OX=9606 GN=ATP1B1 PE=1 SV=1	42	11	23	11	303	35	8.53	27.89	97	87.4	120.4	81.7	136.4	77.2
P50851	Lipopolysaccharide-responsive and beige-like anchor protein OS=Homo sapiens OX=9606 GN=LRBA PE=1 SV=4	7	19	21	19	2863	318.9	5.6	26.99	96.6	90.2	128.1	81.1	118.2	85.9
Q16531	DNA damage-binding protein 1 OS=Homo sapiens OX=9606 GN=DDB1 PE=1 SV=1	18	19	24	19	1140	126.9	5.26	48.15	95.8	96.8	113.9	90.4	114.4	88.6
Q96I99	Succinate--CoA ligase [GDP-forming] subunit beta, mitochondrial OS=Homo sapiens OX=9606 GN=SUCLG2 PE=1 SV=2	31	12	24	11	432	46.5	6.39	34.78	100.1	84.9	125.9	80.6	122.6	85.8
Q9UGI8	Testin OS=Homo sapiens OX=9606 GN=TES PE=1 SV=1	41	16	23	16	421	48	7.68	28.34	110.7	98.6	101.5	89.5	111.5	88.2
P07602	Prosaposin OS=Homo sapiens OX=9606 GN=PSAP PE=1 SV=2	29	15	36	15	524	58.1	5.17	66.13	103.9	67.5	114.8	93.5	140.5	79.9
P01903	HLA class II histocompatibility antigen, DR alpha chain OS=Homo sapiens OX=9606 GN=HLA-DRA PE=1 SV=1	33	7	29	6	254	28.6	5	50.87	101.1	86.7	130	97.3	98	86.9
Q15942	Zyxin OS=Homo sapiens OX=9606 GN=ZYX PE=1 SV=1	27	10	22	10	572	61.2	6.67	37.9	121.5	107.8	93.3	102.2	82.8	92.3
P78347	General transcription factor II-I OS=Homo sapiens OX=9606 GN=GTF2I PE=1 SV=2	17	15	22	15	998	112.3	6.39	38	80.1	83.4	149.6	78.4	127.6	81
P01877	Immunoglobulin heavy constant alpha 2 OS=Homo sapiens OX=9606 GN=IGHA2 PE=1 SV=4	42	9	43	4	340	36.6	6.27	67	80.3	106.2	89.2	123.3	85.7	115.4
P02765	Alpha-2-HS-glycoprotein OS=Homo sapiens OX=9606 GN=AHSG PE=1 SV=2	20	8	23	8	367	39.3	5.72	53.42	102	121	65.1	114	69.5	128.3
P31947	14-3-3 protein sigma OS=Homo sapiens OX=9606 GN=SFN PE=1 SV=1	40	10	34	7	248	27.8	4.74	56.71	67	61	223.7	52.1	135.3	60.9
P78371	T-complex protein 1 subunit beta OS=Homo sapiens OX=9606 GN=CCT2 PE=1 SV=4	35	16	25	16	535	57.5	6.46	43.68	96.1	100.3	108.5	101.8	97.4	96
P08123	Collagen alpha-2(I) chain OS=Homo sapiens OX=9606 GN=COL1A2 PE=1 SV=7	9	11	33	11	1366	129.2	8.95	64.58	129.2	84.8	63.2	82.8	83.7	156.3
O60749	Sorting nexin-2 OS=Homo sapiens OX=9606 GN=SNX2 PE=1 SV=2	31	15	23	13	519	58.4	5.12	40.39	98.8	95.1	107.8	103.4	99.4	95.5
P00491	Purine nucleoside phosphorylase OS=Homo sapiens OX=9606 GN=PNP PE=1 SV=2	42	10	17	10	289	32.1	6.95	41.41	91.8	111.2	83	109.9	95.6	108.4
P0DP25	Calmodulin-3 OS=Homo sapiens OX=9606 GN=CALM3 PE=1 SV=1	52	8	37	6	149	16.8	4.22	85.69	114	97.4	93.6	95	114.5	85.5
Q13596	Sorting nexin-1 OS=Homo sapiens OX=9606 GN=SNX1 PE=1 SV=3	25	13	19	11	522	59	5.15	31.35	103.3	99.1	97.4	104.6	103.6	91.9
P38919	Eukaryotic initiation factor 4A-III OS=Homo sapiens OX=9606 GN=EIF4A3 PE=1 SV=4	31	13	21	10	411	46.8	6.73	40.32	84.8	104.2	103.7	110.6	95.4	101.3
P28331	NADH-ubiquinone oxidoreductase 75 kDa subunit, mitochondrial OS=Homo sapiens OX=9606 GN=NDUFS1 PE=1 SV=3	29	15	17	15	727	79.4	6.23	38.09	97.1	88.2	113.2	87.6	125.2	88.7
Q08380	Galectin-3-binding protein OS=Homo sapiens OX=9606 GN=LGALS3BP PE=1 SV=1	24	12	22	12	585	65.3	5.27	44.9	87.5	81.1	153.5	78.6	121.2	78.2
P05387	60S acidic ribosomal protein P2 OS=Homo sapiens OX=9606 GN=RPLP2 PE=1 SV=1	54	6	22	6	115	11.7	4.54	51.77	94.6	88.2	111.6	86.7	129.2	89.7
P51648	Aldehyde dehydrogenase family 3 member A2 OS=Homo sapiens OX=9606 GN=ALDH3A2 PE=1 SV=1	31	12	18	11	485	54.8	7.88	37.88	103.3	106.2	101.2	93.5	105.4	90.3
P35998	26S proteasome regulatory subunit 7 OS=Homo sapiens OX=9606 GN=PSMC2 PE=1 SV=3	37	16	20	16	433	48.6	5.95	28.43	93.7	95.5	112.6	91.6	110.9	95.7
Q9BUF5	Tubulin beta-6 chain OS=Homo sapiens OX=9606 GN=TUBB6 PE=1 SV=1	26	10	41	5	446	49.8	4.88	39.85	116.7	94.9	89.9	106.2	84.6	107.7
P52566	Rho GDP-dissociation inhibitor 2 OS=Homo sapiens OX=9606 GN=ARHGDIB PE=1 SV=3	63	9	25	9	201	23	5.21	39.7	103.4	86.6	101.8	86.7	127.3	94.2
P42765	3-ketoacyl-CoA thiolase, mitochondrial OS=Homo sapiens OX=9606 GN=ACAA2 PE=1 SV=2	37	13	23	13	397	41.9	8.09	32.05	104.3	93.5	101	94.7	116.7	89.8
P30048	Thioredoxin-dependent peroxide reductase, mitochondrial OS=Homo sapiens OX=9606 GN=PRDX3 PE=1 SV=3	36	6	24	6	256	27.7	7.78	63.7	99.2	81.9	135.3	84	110.4	89.2
P54136	Arginine--tRNA ligase, cytoplasmic OS=Homo sapiens OX=9606 GN=RARS PE=1 SV=2	26	16	30	16	660	75.3	6.68	39.28	95.8	88.1	131	85.7	112.9	86.6
P60981	Destrin OS=Homo sapiens OX=9606 GN=DSTN PE=1 SV=3	43	10	24	9	165	18.5	7.85	48.06	125	96.3	108.9	88.9	93.7	87.3
Q92888	Rho guanine nucleotide exchange factor 1 OS=Homo sapiens OX=9606 GN=ARHGEF1 PE=1 SV=2	21	16	19	16	912	102.4	5.66	25.95	108.3	95.6	96.1	95.6	110.9	93.5
Q6WCQ1	Myosin phosphatase Rho-interacting protein OS=Homo sapiens OX=9606 GN=MPRIP PE=1 SV=3	19	15	18	15	1025	116.5	6.21	35.02	105.5	106.7	83.9	103.1	101.8	99.1
P09382	Galectin-1 OS=Homo sapiens OX=9606 GN=LGALS1 PE=1 SV=2	53	7	43	7	135	14.7	5.5	80.54	102.2	100.6	92.7	110.3	94.4	99.8
P05362	Intercellular adhesion molecule 1 OS=Homo sapiens OX=9606 GN=ICAM1 PE=1 SV=2	24	12	21	12	532	57.8	7.99	48.36	112.8	103	80.9	108.4	92.4	102.6
Q8TD06	Anterior gradient protein 3 OS=Homo sapiens OX=9606 GN=AGR3 PE=1 SV=1	48	8	23	7	166	19.2	7.99	42.04	94.2	83.3	190.8	72.4	82.8	76.4
Q99623	Prohibitin-2 OS=Homo sapiens OX=9606 GN=PHB2 PE=1 SV=2	43	15	26	15	299	33.3	9.83	52.98	96.8	84.6	132.1	82.4	121.5	82.6
Q15109	Advanced glycosylation end product-specific receptor OS=Homo sapiens OX=9606 GN=AGER PE=1 SV=1	25	6	29	6	404	42.8	6.13	68.85	149.8	141.9	45.5	127.4	48.6	86.7
P01031	Complement C5 OS=Homo sapiens OX=9606 GN=C5 PE=1 SV=4	10	20	24	20	1676	188.2	6.52	29.8	80.2	106.9	73.6	123.5	76.8	139.1
Q12805	EGF-containing fibulin-like extracellular matrix protein 1 OS=Homo sapiens OX=9606 GN=EFEMP1 PE=1 SV=2	28	11	19	11	493	54.6	5.07	34.72	113.2	86	92.2	86.9	108.1	113.6
P04080	Cystatin-B OS=Homo sapiens OX=9606 GN=CSTB PE=1 SV=2	89	6	40	6	98	11.1	7.56	70.42	96.2	78.7	118	103.4	115.7	88.1
P50502	Hsc70-interacting protein OS=Homo sapiens OX=9606 GN=ST13 PE=1 SV=2	21	7	24	7	369	41.3	5.27	36.76	89.2	99.4	132.5	98	88.7	92.2
P32455	Guanylate-binding protein 1 OS=Homo sapiens OX=9606 GN=GBP1 PE=1 SV=2	22	14	22	12	592	67.9	6.32	39.15	109.8	102.6	100.4	121.7	73.6	91.9
Q9UJS0	Calcium-binding mitochondrial carrier protein Aralar2 OS=Homo sapiens OX=9606 GN=SLC25A13 PE=1 SV=2	25	14	17	10	675	74.1	8.62	28.27	88.8	87.5	153.7	87.9	97.8	84.2
Q16658	Fascin OS=Homo sapiens OX=9606 GN=FSCN1 PE=1 SV=3	31	15	25	15	493	54.5	7.24	48.95	107.3	115.8	82.6	108.8	88.4	97.1
P27695	DNA-(apurinic or apyrimidinic site) lyase OS=Homo sapiens OX=9606 GN=APEX1 PE=1 SV=2	40	12	23	12	318	35.5	8.12	31.94	91	91.7	122.3	90.9	120.1	84
P04844	Dolichyl-diphosphooligosaccharide--protein glycosyltransferase subunit 2 OS=Homo sapiens OX=9606 GN=RPN2 PE=1 SV=3	24	11	19	11	631	69.2	5.69	33.77	93.2	90.2	105.5	94	119.2	97.9
P40227	T-complex protein 1 subunit zeta OS=Homo sapiens OX=9606 GN=CCT6A PE=1 SV=3	27	15	23	15	531	58	6.68	36.11	98.1	95.1	110.7	91.4	108.6	96.1
Q14258	E3 ubiquitin/ISG15 ligase TRIM25 OS=Homo sapiens OX=9606 GN=TRIM25 PE=1 SV=2	26	13	21	13	630	70.9	8.09	29.88	106.1	93.6	113.9	97.2	98.2	91
Q9Y383	Putative RNA-binding protein Luc7-like 2 OS=Homo sapiens OX=9606 GN=LUC7L2 PE=1 SV=2	36	13	22	8	392	46.5	10.01	46.99	94.4	82.1	134.2	79.8	128.3	81.2
Q9NZ08	Endoplasmic reticulum aminopeptidase 1 OS=Homo sapiens OX=9606 GN=ERAP1 PE=1 SV=3	18	15	23	15	941	107.2	6.46	23.56	93	87.1	124.3	91.4	110.6	93.7
Q9Y265	RuvB-like 1 OS=Homo sapiens OX=9606 GN=RUVBL1 PE=1 SV=1	36	12	18	12	456	50.2	6.42	26.86	99.5	100.2	105.6	93.2	114.6	86.9
Q9H8L6	Multimerin-2 OS=Homo sapiens OX=9606 GN=MMRN2 PE=1 SV=2	15	13	17	13	949	104.3	5.86	30.2	132.1	123	71.4	103.9	76.5	93.1
Q6UWY5	Olfactomedin-like protein 1 OS=Homo sapiens OX=9606 GN=OLFML1 PE=1 SV=2	26	10	20	10	402	45.9	8.09	39.35	135	128.4	58.9	106.6	60.8	110.2
P62820	Ras-related protein Rab-1A OS=Homo sapiens OX=9606 GN=RAB1A PE=1 SV=3	52	11	29	4	205	22.7	6.21	54.55	101.9	91.5	103.6	92.7	121.4	88.9
P35908	Keratin, type II cytoskeletal 2 epidermal OS=Homo sapiens OX=9606 GN=KRT2 PE=1 SV=2	24	16	25	8	639	65.4	8	35.25	212.2	82.3	64.3	72.7	65.3	103.2
Q99873	Protein arginine N-methyltransferase 1 OS=Homo sapiens OX=9606 GN=PRMT1 PE=1 SV=3	34	14	20	14	371	42.4	5.35	23.4	98.3	92.3	106.1	93.3	119.4	90.6
P35611	Alpha-adducin OS=Homo sapiens OX=9606 GN=ADD1 PE=1 SV=2	20	12	18	11	737	80.9	5.83	26.62	104.7	112.7	82	110.2	86	104.4
P13716	Delta-aminolevulinic acid dehydratase OS=Homo sapiens OX=9606 GN=ALAD PE=1 SV=1	34	9	19	9	330	36.3	6.79	50.33	92.5	124.9	78.7	123.4	80.5	100
P38606	V-type proton ATPase catalytic subunit A OS=Homo sapiens OX=9606 GN=ATP6V1A PE=1 SV=2	22	12	22	12	617	68.3	5.52	41.76	102.4	88.7	100.9	101.5	111.6	94.9
O95171	Sciellin OS=Homo sapiens OX=9606 GN=SCEL PE=1 SV=2	30	17	19	17	688	77.5	9.38	18.88	122.8	113.7	101.8	103.3	61.9	96.5
Q9HC38	Glyoxalase domain-containing protein 4 OS=Homo sapiens OX=9606 GN=GLOD4 PE=1 SV=1	37	11	22	11	313	34.8	5.6	38.09	105.6	104.6	95.8	96.8	107.4	89.7
P13645	Keratin, type I cytoskeletal 10 OS=Homo sapiens OX=9606 GN=KRT10 PE=1 SV=6	29	16	26	13	584	58.8	5.21	39.03	210.4	77.8	69.3	70.9	65.3	106.3
P23634	Plasma membrane calcium-transporting ATPase 4 OS=Homo sapiens OX=9606 GN=ATP2B4 PE=1 SV=2	13	12	16	6	1241	137.8	6.6	32.63	110.4	108.3	92.5	98.7	94.9	95.2
Q6DD88	Atlastin-3 OS=Homo sapiens OX=9606 GN=ATL3 PE=1 SV=1	31	14	22	14	541	60.5	5.66	32.48	96.6	91.1	111.7	90.4	123.1	87.1
P22061	Protein-L-isoaspartate(D-aspartate) O-methyltransferase OS=Homo sapiens OX=9606 GN=PCMT1 PE=1 SV=4	60	10	16	10	227	24.6	7.21	35.38	103.8	112.7	92.3	116.5	74.5	100.2
O95831	Apoptosis-inducing factor 1, mitochondrial OS=Homo sapiens OX=9606 GN=AIFM1 PE=1 SV=1	31	14	17	14	613	66.9	8.95	34.05	91.6	73.7	182.8	71.5	101.5	79
Q7L014	Probable ATP-dependent RNA helicase DDX46 OS=Homo sapiens OX=9606 GN=DDX46 PE=1 SV=2	23	19	22	19	1031	117.3	9.29	25.39	92.7	87.6	138.6	85.3	109.9	85.8
Q13418	Integrin-linked protein kinase OS=Homo sapiens OX=9606 GN=ILK PE=1 SV=2	28	13	26	13	452	51.4	8.07	45.01	115.4	114	81.3	101.2	83.6	104.5
P62753	40S ribosomal protein S6 OS=Homo sapiens OX=9606 GN=RPS6 PE=1 SV=1	35	10	28	10	249	28.7	10.84	51.92	100.7	82.5	114.5	82	130.6	89.6
P01011	Alpha-1-antichymotrypsin OS=Homo sapiens OX=9606 GN=SERPINA3 PE=1 SV=2	24	9	25	9	423	47.6	5.52	34.86	73.9	91.2	87.1	141.1	70.1	136.5
O60664	Perilipin-3 OS=Homo sapiens OX=9606 GN=PLIN3 PE=1 SV=3	38	13	18	13	434	47	5.44	25.85	96.8	88.5	110.1	88	117.7	99
P25786	Proteasome subunit alpha type-1 OS=Homo sapiens OX=9606 GN=PSMA1 PE=1 SV=1	37	10	25	10	263	29.5	6.61	52.19	97.9	91.1	117.3	96.2	105.2	92.3
P15880	40S ribosomal protein S2 OS=Homo sapiens OX=9606 GN=RPS2 PE=1 SV=2	34	10	22	10	293	31.3	10.24	52.16	97.5	79.8	121.6	82.8	132.7	85.7
P35270	Sepiapterin reductase OS=Homo sapiens OX=9606 GN=SPR PE=1 SV=1	48	10	15	10	261	28	8.05	30.55	86.3	92	111.4	90.8	139	80.6
P05107	Integrin beta-2 OS=Homo sapiens OX=9606 GN=ITGB2 PE=1 SV=2	25	17	21	16	769	84.7	6.95	34.59	97.4	92	100.7	100.7	111.3	97.9
B5ME19	Eukaryotic translation initiation factor 3 subunit C-like protein OS=Homo sapiens OX=9606 GN=EIF3CL PE=1 SV=1	18	17	21	17	914	105.4	5.64	32.22	105.4	94.6	109.1	92.3	110.1	88.5
O75475	PC4 and SFRS1-interacting protein OS=Homo sapiens OX=9606 GN=PSIP1 PE=1 SV=1	35	17	25	16	530	60.1	9.13	30.23	110.8	102.9	109.3	93.3	95.3	88.4
Q14112	Nidogen-2 OS=Homo sapiens OX=9606 GN=NID2 PE=1 SV=3	15	19	22	18	1375	151.2	5.29	27.56	134.5	119.4	75.8	92.7	78.6	99
P30040	Endoplasmic reticulum resident protein 29 OS=Homo sapiens OX=9606 GN=ERP29 PE=1 SV=4	41	9	25	9	261	29	7.31	49.61	91.8	82.8	105.5	93.6	134.6	91.8
P43490	Nicotinamide phosphoribosyltransferase OS=Homo sapiens OX=9606 GN=NAMPT PE=1 SV=1	31	14	24	14	491	55.5	7.15	45.84	99	93	111.8	102.1	104.4	89.7
P31943	Heterogeneous nuclear ribonucleoprotein H OS=Homo sapiens OX=9606 GN=HNRNPH1 PE=1 SV=4	25	11	27	2	449	49.2	6.3	53.17	97.4	90	121.1	88.1	115.7	87.7
P27338	Amine oxidase [flavin-containing] B OS=Homo sapiens OX=9606 GN=MAOB PE=1 SV=3	24	14	19	9	520	58.7	7.5	41.24	113.6	100.4	103.9	98.2	87.8	96.1
Q9UL46	Proteasome activator complex subunit 2 OS=Homo sapiens OX=9606 GN=PSME2 PE=1 SV=4	37	9	24	9	239	27.4	5.73	32.25	96.1	88.1	123.3	101.9	102.8	87.8
Q96TA1	Protein Niban 2 OS=Homo sapiens OX=9606 GN=NIBAN2 PE=1 SV=3	19	14	20	14	746	84.1	6.19	35.5	106.1	104	90.2	96.3	113.4	90
P04217	Alpha-1B-glycoprotein OS=Homo sapiens OX=9606 GN=A1BG PE=1 SV=4	22	8	31	8	495	54.2	5.86	49.59	92.8	113	75.5	115.1	84.1	119.4
Q7L576	Cytoplasmic FMR1-interacting protein 1 OS=Homo sapiens OX=9606 GN=CYFIP1 PE=1 SV=1	17	19	26	9	1253	145.1	6.9	35.45	102.3	99	104.3	101.1	96.7	96.5
Q9UHG3	Prenylcysteine oxidase 1 OS=Homo sapiens OX=9606 GN=PCYOX1 PE=1 SV=3	29	13	19	13	505	56.6	6.18	40.25	111.9	115.1	75.9	107.9	102.9	86.3
P29350	Tyrosine-protein phosphatase non-receptor type 6 OS=Homo sapiens OX=9606 GN=PTPN6 PE=1 SV=1	34	19	22	19	595	67.5	7.78	30.42	109.2	99.1	93.5	104.9	100	93.4
P29144	Tripeptidyl-peptidase 2 OS=Homo sapiens OX=9606 GN=TPP2 PE=1 SV=4	13	14	18	14	1249	138.3	6.32	25.74	97.6	103.9	99.6	103.6	95.8	99.4
Q14651	Plastin-1 OS=Homo sapiens OX=9606 GN=PLS1 PE=1 SV=2	20	13	22	10	629	70.2	5.41	38.11	92.9	83.9	111.7	72.6	158.7	80.1
Q96AQ6	Pre-B-cell leukemia transcription factor-interacting protein 1 OS=Homo sapiens OX=9606 GN=PBXIP1 PE=1 SV=1	19	12	18	12	731	80.6	5.33	29.14	78.6	73.4	125.7	65.8	179	77.5
Q9BSJ8	Extended synaptotagmin-1 OS=Homo sapiens OX=9606 GN=ESYT1 PE=1 SV=1	16	15	22	14	1104	122.8	5.83	34.48	97.1	98.9	102.8	100.4	110.7	90.1
P01861	Immunoglobulin heavy constant gamma 4 OS=Homo sapiens OX=9606 GN=IGHG4 PE=1 SV=1	42	9	66	6	327	35.9	7.36	122.16	74.5	96.3	75.1	125.3	82.8	145.9
P12236	ADP/ATP translocase 3 OS=Homo sapiens OX=9606 GN=SLC25A6 PE=1 SV=4	32	10	27	1	298	32.8	9.74	45.82	109.3	84.7	126	87	103.2	89.8
P46777	60S ribosomal protein L5 OS=Homo sapiens OX=9606 GN=RPL5 PE=1 SV=3	30	12	26	12	297	34.3	9.72	37.8	98.1	81.3	127.9	78.1	133.4	81.1
P12235	ADP/ATP translocase 1 OS=Homo sapiens OX=9606 GN=SLC25A4 PE=1 SV=4	33	10	23	4	298	33	9.76	43.45	87.5	99.9	102.9	97.1	110.3	102.2
P45974	Ubiquitin carboxyl-terminal hydrolase 5 OS=Homo sapiens OX=9606 GN=USP5 PE=1 SV=2	22	14	20	14	858	95.7	5.03	22.91	98.2	101.3	90.2	106.3	99.2	104.8
P62873	Guanine nucleotide-binding protein G(I)/G(S)/G(T) subunit beta-1 OS=Homo sapiens OX=9606 GN=GNB1 PE=1 SV=3	28	9	32	5	340	37.4	6	62.01	113	105.9	87.5	102.9	92.8	97.8
P39019	40S ribosomal protein S19 OS=Homo sapiens OX=9606 GN=RPS19 PE=1 SV=2	44	8	25	8	145	16.1	10.32	50.18	98.8	82.5	121.3	80.6	129.8	87
P11940	Polyadenylate-binding protein 1 OS=Homo sapiens OX=9606 GN=PABPC1 PE=1 SV=2	24	15	21	11	636	70.6	9.5	39.35	104.6	84.1	109.5	87.9	125.5	88.4
Q9UDY2	Tight junction protein ZO-2 OS=Homo sapiens OX=9606 GN=TJP2 PE=1 SV=2	17	16	19	16	1190	133.9	7.4	34.94	116.3	104.3	89.8	98.3	98.1	93.2
P17980	26S proteasome regulatory subunit 6A OS=Homo sapiens OX=9606 GN=PSMC3 PE=1 SV=3	32	11	18	11	439	49.2	5.24	29.88	96.6	97.7	111.3	94.3	108.9	91.2
Q16666	Gamma-interferon-inducible protein 16 OS=Homo sapiens OX=9606 GN=IFI16 PE=1 SV=3	20	14	21	13	785	88.2	9.28	25.87	101.4	94.3	104.9	100.7	102	96.6
P20591	Interferon-induced GTP-binding protein Mx1 OS=Homo sapiens OX=9606 GN=MX1 PE=1 SV=4	26	15	21	14	662	75.5	5.83	36.7	87.5	80.2	173.7	138.4	55.4	64.8
O95833	Chloride intracellular channel protein 3 OS=Homo sapiens OX=9606 GN=CLIC3 PE=1 SV=2	58	11	26	11	236	26.6	6.43	37.1	91.5	93.6	86.2	87	159.1	82.6
P09668	Pro-cathepsin H OS=Homo sapiens OX=9606 GN=CTSH PE=1 SV=4	19	6	23	6	335	37.4	8.07	60.58	102.8	81.5	132.3	86.3	108.9	88.3
P61204	ADP-ribosylation factor 3 OS=Homo sapiens OX=9606 GN=ARF3 PE=1 SV=2	43	7	26	3	181	20.6	7.43	57.38	101.7	89	105.6	90.1	128.5	85.1
P04424	Argininosuccinate lyase OS=Homo sapiens OX=9606 GN=ASL PE=1 SV=4	30	13	20	13	464	51.6	6.48	34.17	82.9	99.4	105.9	92	132.4	87.4
Q06210	Glutamine--fructose-6-phosphate aminotransferase [isomerizing] 1 OS=Homo sapiens OX=9606 GN=GFPT1 PE=1 SV=3	25	15	20	15	699	78.8	7.11	30.65	98.3	83.8	104.8	83.6	143.6	85.9
Q04695	Keratin, type I cytoskeletal 17 OS=Homo sapiens OX=9606 GN=KRT17 PE=1 SV=2	26	13	34	4	432	48.1	5.02	52.38	87.4	125	147.5	64.9	78.6	96.6
P07686	Beta-hexosaminidase subunit beta OS=Homo sapiens OX=9606 GN=HEXB PE=1 SV=3	22	12	24	11	556	63.1	6.76	32	89.8	80.3	150	87.4	113.9	78.6
P51812	Ribosomal protein S6 kinase alpha-3 OS=Homo sapiens OX=9606 GN=RPS6KA3 PE=1 SV=1	23	15	20	9	740	83.7	6.89	28.61	103.1	81.3	141.7	83.9	101.7	88.3
Q13642	Four and a half LIM domains protein 1 OS=Homo sapiens OX=9606 GN=FHL1 PE=1 SV=4	36	9	27	9	323	36.2	8.97	38.53	146.3	108.2	86.1	91.2	75.7	92.6
O75368	SH3 domain-binding glutamic acid-rich-like protein OS=Homo sapiens OX=9606 GN=SH3BGRL PE=1 SV=1	89	9	19	9	114	12.8	5.25	36.96	112.5	95.7	99.5	93.6	88	110.7
P12268	Inosine-5'-monophosphate dehydrogenase 2 OS=Homo sapiens OX=9606 GN=IMPDH2 PE=1 SV=2	33	13	15	13	514	55.8	6.9	30.49	94.5	93.9	125.6	98.1	97.9	90.1
O43776	Asparagine--tRNA ligase, cytoplasmic OS=Homo sapiens OX=9606 GN=NARS1 PE=1 SV=1	27	13	18	13	548	62.9	6.25	25.87	97	96.2	102.2	98.5	110.9	95.2
P36776	Lon protease homolog, mitochondrial OS=Homo sapiens OX=9606 GN=LONP1 PE=1 SV=2	16	14	18	14	959	106.4	6.39	20.68	98.8	87.8	118	91.5	115.1	88.9
O95425	Supervillin OS=Homo sapiens OX=9606 GN=SVIL PE=1 SV=2	9	16	19	16	2214	247.6	6.98	24.16	93.8	97.7	114.2	91.1	111.2	91.9
P21796	Voltage-dependent anion-selective channel protein 1 OS=Homo sapiens OX=9606 GN=VDAC1 PE=1 SV=2	37	10	22	9	283	30.8	8.54	45.4	98.1	84.3	147.2	87.5	102.7	80.1
Q86UE4	Protein LYRIC OS=Homo sapiens OX=9606 GN=MTDH PE=1 SV=2	22	12	20	12	582	63.8	9.32	30.25	103.9	84.7	116.5	87.3	121.5	86.1
P22307	Non-specific lipid-transfer protein OS=Homo sapiens OX=9606 GN=SCP2 PE=1 SV=2	23	14	20	14	547	59	6.89	29.42	95.1	89.1	127.7	91	111.2	85.9
P40763	Signal transducer and activator of transcription 3 OS=Homo sapiens OX=9606 GN=STAT3 PE=1 SV=2	22	15	21	15	770	88	6.3	33.07	97.1	97.6	112.7	94.7	103.6	94.3
P04439	HLA class I histocompatibility antigen, A alpha chain OS=Homo sapiens OX=9606 GN=HLA-A PE=1 SV=2	32	8	28	4	365	40.8	6	45.18	111	99.4	102.6	94.1	94.9	98.1
Q9H0U4	Ras-related protein Rab-1B OS=Homo sapiens OX=9606 GN=RAB1B PE=1 SV=1	46	10	29	3	201	22.2	5.73	58.73	102.6	84.2	116	82.4	129.1	85.8
P53999	Activated RNA polymerase II transcriptional coactivator p15 OS=Homo sapiens OX=9606 GN=SUB1 PE=1 SV=3	46	7	22	7	127	14.4	9.6	27.71	89.5	74.3	160.9	73.3	121	80.8
P02792	Ferritin light chain OS=Homo sapiens OX=9606 GN=FTL PE=1 SV=2	50	8	23	8	175	20	5.78	39.39	49.4	44.8	114.8	112.4	167.7	111
Q07960	Rho GTPase-activating protein 1 OS=Homo sapiens OX=9606 GN=ARHGAP1 PE=1 SV=1	31	11	18	11	439	50.4	6.29	39.88	97.8	94.9	107.5	99.4	111.2	89.1
Q3LXA3	Triokinase/FMN cyclase OS=Homo sapiens OX=9606 GN=TKFC PE=1 SV=2	26	11	16	11	575	58.9	7.49	29.29	99.5	106.3	102.4	89.5	110.6	91.7
Q3ZCM7	Tubulin beta-8 chain OS=Homo sapiens OX=9606 GN=TUBB8 PE=1 SV=2	25	9	81	3	444	49.7	4.89	114.6	104	94.7	107	104.4	91.1	98.8
Q9UHB6	LIM domain and actin-binding protein 1 OS=Homo sapiens OX=9606 GN=LIMA1 PE=1 SV=1	21	14	18	14	759	85.2	6.84	21	118.9	92.6	97.7	85.5	126	79.3
A0A0B4J2D5	Glutamine amidotransferase-like class 1 domain-containing protein 3B, mitochondrial OS=Homo sapiens OX=9606 GN=GATD3B PE=1 SV=1	40	10	17	10	268	28.1	8.27	39.05	94	92.2	129.1	87.7	109	87.8
P17844	Probable ATP-dependent RNA helicase DDX5 OS=Homo sapiens OX=9606 GN=DDX5 PE=1 SV=1	24	15	25	7	614	69.1	8.92	39.33	96.6	88.1	120	85.2	119.9	90.2
P02760	Protein AMBP OS=Homo sapiens OX=9606 GN=AMBP PE=1 SV=1	30	9	25	9	352	39	6.25	41.78	103.2	114.4	77.9	114.7	73.5	116.3
P00441	Superoxide dismutase [Cu-Zn] OS=Homo sapiens OX=9606 GN=SOD1 PE=1 SV=2	48	9	37	9	154	15.9	6.13	81.13	91.1	94.8	112.6	94.3	112.1	95.1
P31040	Succinate dehydrogenase [ubiquinone] flavoprotein subunit, mitochondrial OS=Homo sapiens OX=9606 GN=SDHA PE=1 SV=2	26	14	20	14	664	72.6	7.39	21.58	102.7	91.7	106.9	83.9	121.5	93.2
P55060	Exportin-2 OS=Homo sapiens OX=9606 GN=CSE1L PE=1 SV=3	19	16	20	16	971	110.3	5.77	34.92	97.6	92.8	113.2	90.8	120.1	85.4
Q9NVA2	Septin-11 OS=Homo sapiens OX=9606 GN=SEPTIN11 PE=1 SV=3	30	10	17	4	429	49.4	6.81	31.9	101	100.2	100.2	106.5	86.2	106
Q9UNH7	Sorting nexin-6 OS=Homo sapiens OX=9606 GN=SNX6 PE=1 SV=1	35	14	21	13	406	46.6	6.16	34.83	102.9	89.4	113.1	103	99.4	92.2
P51149	Ras-related protein Rab-7a OS=Homo sapiens OX=9606 GN=RAB7A PE=1 SV=1	48	9	20	9	207	23.5	6.7	33.4	98.1	105.2	85.4	118.9	90.7	101.7
P56192	Methionine--tRNA ligase, cytoplasmic OS=Homo sapiens OX=9606 GN=MARS PE=1 SV=2	20	13	16	13	900	101.1	6.16	17.76	90.5	86.2	125.1	86	125.8	86.3
Q14683	Structural maintenance of chromosomes protein 1A OS=Homo sapiens OX=9606 GN=SMC1A PE=1 SV=2	15	19	22	19	1233	143.1	7.64	35.79	97.9	93	125.2	81.3	118.6	84
Q02790	Peptidyl-prolyl cis-trans isomerase FKBP4 OS=Homo sapiens OX=9606 GN=FKBP4 PE=1 SV=3	33	15	20	15	459	51.8	5.43	22.82	79.1	93.5	104.2	96.7	135.8	90.6
P13861	cAMP-dependent protein kinase type II-alpha regulatory subunit OS=Homo sapiens OX=9606 GN=PRKAR2A PE=1 SV=2	25	8	17	6	404	45.5	5.07	33.03	95.3	95.2	112.5	88.4	128.1	80.6
Q9P2M7	Cingulin OS=Homo sapiens OX=9606 GN=CGN PE=1 SV=2	16	15	19	15	1197	136.3	5.54	28.78	110.8	102.8	101.2	95.9	98.2	91.2
P30084	Enoyl-CoA hydratase, mitochondrial OS=Homo sapiens OX=9606 GN=ECHS1 PE=1 SV=4	33	10	18	10	290	31.4	8.07	30.44	90.6	82.1	145.9	81.9	115.4	84
Q9NR12	PDZ and LIM domain protein 7 OS=Homo sapiens OX=9606 GN=PDLIM7 PE=1 SV=1	33	14	20	14	457	49.8	8.41	26.44	120.5	96.8	99.7	96.3	95	91.7
P38117	Electron transfer flavoprotein subunit beta OS=Homo sapiens OX=9606 GN=ETFB PE=1 SV=3	48	10	19	10	255	27.8	8.1	38.73	103.4	87.2	121.8	87.2	108.3	92.2
Q99758	ATP-binding cassette sub-family A member 3 OS=Homo sapiens OX=9606 GN=ABCA3 PE=1 SV=2	8	13	16	13	1704	191.2	7.62	32.12	134.7	121	71.4	115	61	96.9
P62191	26S proteasome regulatory subunit 4 OS=Homo sapiens OX=9606 GN=PSMC1 PE=1 SV=1	41	15	20	15	440	49.2	6.21	29.46	92.2	97.3	107.3	98.1	107.2	97.9
Q13045	Protein flightless-1 homolog OS=Homo sapiens OX=9606 GN=FLII PE=1 SV=2	14	17	20	17	1269	144.7	6.05	31.24	106.8	100.2	100.1	97.8	103.6	91.6
P52565	Rho GDP-dissociation inhibitor 1 OS=Homo sapiens OX=9606 GN=ARHGDIA PE=1 SV=3	29	6	29	6	204	23.2	5.11	47.54	105.7	97.5	103.2	97.7	99.3	96.5
Q92598	Heat shock protein 105 kDa OS=Homo sapiens OX=9606 GN=HSPH1 PE=1 SV=1	18	13	17	11	858	96.8	5.39	29.22	104.6	95.3	119.6	89.4	100.5	90.6
Q13409	Cytoplasmic dynein 1 intermediate chain 2 OS=Homo sapiens OX=9606 GN=DYNC1I2 PE=1 SV=3	14	9	15	9	638	71.4	5.2	28.76	108.5	99.2	101	94.7	104.5	92.1
P55263	Adenosine kinase OS=Homo sapiens OX=9606 GN=ADK PE=1 SV=2	32	13	18	13	362	40.5	6.7	23.33	91.2	87.1	133.3	78.2	123.1	87.2
Q9BS26	Endoplasmic reticulum resident protein 44 OS=Homo sapiens OX=9606 GN=ERP44 PE=1 SV=1	37	15	28	15	406	46.9	5.26	46.38	97.5	83.8	108	89.6	132.3	88.8
P54920	Alpha-soluble NSF attachment protein OS=Homo sapiens OX=9606 GN=NAPA PE=1 SV=3	43	11	18	11	295	33.2	5.36	26.56	95.7	99.8	105.7	103.3	102.7	92.9
Q16543	Hsp90 co-chaperone Cdc37 OS=Homo sapiens OX=9606 GN=CDC37 PE=1 SV=1	26	8	18	8	378	44.4	5.25	34.14	107.4	98.3	100.8	95.9	106.1	91.6
Q15366	Poly(rC)-binding protein 2 OS=Homo sapiens OX=9606 GN=PCBP2 PE=1 SV=1	29	9	21	3	365	38.6	6.79	47.27	93.2	87.3	120.3	90.2	125.6	83.4
P07108	Acyl-CoA-binding protein OS=Homo sapiens OX=9606 GN=DBI PE=1 SV=2	75	6	29	6	87	10	6.57	54.63	96.8	84.5	112.4	97.5	130.1	78.7
P18085	ADP-ribosylation factor 4 OS=Homo sapiens OX=9606 GN=ARF4 PE=1 SV=3	41	7	22	4	180	20.5	7.14	45.08	99.9	86.5	112.9	87.2	127.6	85.9
P13073	Cytochrome c oxidase subunit 4 isoform 1, mitochondrial OS=Homo sapiens OX=9606 GN=COX4I1 PE=1 SV=1	46	10	29	10	169	19.6	9.51	36.16	100.3	82.8	123.3	87.6	108.5	97.4
P61247	40S ribosomal protein S3a OS=Homo sapiens OX=9606 GN=RPS3A PE=1 SV=2	41	11	26	11	264	29.9	9.73	46.94	98.3	93.6	112.5	89	122.3	84.3
O14818	Proteasome subunit alpha type-7 OS=Homo sapiens OX=9606 GN=PSMA7 PE=1 SV=1	49	11	23	11	248	27.9	8.46	37.44	95.1	91.7	120.5	98.6	104.8	89.4
Q15417	Calponin-3 OS=Homo sapiens OX=9606 GN=CNN3 PE=1 SV=1	38	10	15	8	329	36.4	6.05	28.89	109.9	98.5	103.5	95.6	98.7	93.8
Q03135	Caveolin-1 OS=Homo sapiens OX=9606 GN=CAV1 PE=1 SV=4	51	9	36	9	178	20.5	6.02	73.69	145	139.5	50.3	121.2	52.1	91.8
Q02880	DNA topoisomerase 2-beta OS=Homo sapiens OX=9606 GN=TOP2B PE=1 SV=3	10	15	16	15	1626	183.2	8	31.2	98	93.9	105	86.4	128.2	88.4
Q92522	Histone H1x OS=Homo sapiens OX=9606 GN=H1FX PE=1 SV=1	40	8	17	8	213	22.5	10.76	39.97	113.1	102.2	113.8	88	98.1	84.9
P37840	Alpha-synuclein OS=Homo sapiens OX=9606 GN=SNCA PE=1 SV=1	47	8	16	8	140	14.5	4.7	45.3	91.5	126.6	65.5	110.3	62.8	143.4
Q93008	Probable ubiquitin carboxyl-terminal hydrolase FAF-X OS=Homo sapiens OX=9606 GN=USP9X PE=1 SV=3	8	16	18	16	2570	292.1	5.8	16.39	105.9	94.7	113.3	84.4	113.1	88.6
Q86UX7	Fermitin family homolog 3 OS=Homo sapiens OX=9606 GN=FERMT3 PE=1 SV=1	24	13	23	13	667	75.9	6.98	24.51	94.2	108.3	83.9	119.1	84.7	109.9
Q9UKM9	RNA-binding protein Raly OS=Homo sapiens OX=9606 GN=RALY PE=1 SV=1	31	10	18	10	306	32.4	9.17	36.08	97.1	82.5	130.9	87.3	122.5	79.7
P10155	60 kDa SS-A/Ro ribonucleoprotein OS=Homo sapiens OX=9606 GN=RO60 PE=1 SV=2	25	12	18	12	538	60.6	8.03	29.22	98	90.6	121.2	82.7	126.7	80.8
P07988	Pulmonary surfactant-associated protein B OS=Homo sapiens OX=9606 GN=SFTPB PE=1 SV=3	22	8	18	8	381	42.1	5.49	41.25	94.5	106	76.2	94.3	129.9	99
Q9BW30	Tubulin polymerization-promoting protein family member 3 OS=Homo sapiens OX=9606 GN=TPPP3 PE=1 SV=1	45	10	18	10	176	19	9.13	34.17	131.5	130.6	90.5	70.6	75	101.8
P53597	Succinate--CoA ligase [ADP/GDP-forming] subunit alpha, mitochondrial OS=Homo sapiens OX=9606 GN=SUCLG1 PE=1 SV=4	27	8	15	8	346	36.2	8.79	33.47	101.5	87.3	122.7	84.3	118.7	85.5
Q8NE71	ATP-binding cassette sub-family F member 1 OS=Homo sapiens OX=9606 GN=ABCF1 PE=1 SV=2	19	14	17	14	845	95.9	6.8	25.93	87.7	81.2	144.8	86.1	121.6	78.5
P20073	Annexin A7 OS=Homo sapiens OX=9606 GN=ANXA7 PE=1 SV=3	23	10	20	10	488	52.7	5.68	31.62	100.6	99.1	104.5	96.1	104.3	95.5
O75396	Vesicle-trafficking protein SEC22b OS=Homo sapiens OX=9606 GN=SEC22B PE=1 SV=4	35	8	17	8	215	24.6	6.92	31.77	85.2	95.3	130.4	95.8	104.8	88.6
O00291	Huntingtin-interacting protein 1 OS=Homo sapiens OX=9606 GN=HIP1 PE=1 SV=5	16	15	19	13	1037	116.1	5.3	33.92	99.5	91.7	100.6	84.5	136.3	87.5
P47755	F-actin-capping protein subunit alpha-2 OS=Homo sapiens OX=9606 GN=CAPZA2 PE=1 SV=3	38	8	14	7	286	32.9	5.85	28.72	99.8	103.1	99.4	102.1	94.2	101.4
Q9BXP5	Serrate RNA effector molecule homolog OS=Homo sapiens OX=9606 GN=SRRT PE=1 SV=1	17	13	17	13	876	100.6	5.96	26.16	94	87.3	122.3	84.9	123.7	87.8
Q99714	3-hydroxyacyl-CoA dehydrogenase type-2 OS=Homo sapiens OX=9606 GN=HSD17B10 PE=1 SV=3	49	9	16	9	261	26.9	7.78	37.54	91.1	90.1	153.4	88	92.3	85.2
Q9UKK3	Protein mono-ADP-ribosyltransferase PARP4 OS=Homo sapiens OX=9606 GN=PARP4 PE=1 SV=3	9	12	17	12	1724	192.5	5.66	21.47	93	99.8	89.3	95.4	127.6	95
O43399	Tumor protein D54 OS=Homo sapiens OX=9606 GN=TPD52L2 PE=1 SV=2	51	10	16	10	206	22.2	5.36	27.37	93.9	92.8	114.8	94	111.9	92.7
P53004	Biliverdin reductase A OS=Homo sapiens OX=9606 GN=BLVRA PE=1 SV=2	26	8	18	8	296	33.4	6.44	37.46	84.7	87.2	136.5	86.3	119.3	85.9
Q8WXH0	Nesprin-2 OS=Homo sapiens OX=9606 GN=SYNE2 PE=1 SV=3	3	20	21	20	6885	795.9	5.36	19.78	93.1	110	113.2	94.5	96.5	92.8
P27361	Mitogen-activated protein kinase 3 OS=Homo sapiens OX=9606 GN=MAPK3 PE=1 SV=4	32	11	18	7	379	43.1	6.74	35.34	104.9	106.9	91.6	110.7	91.4	94.6
P38159	RNA-binding motif protein, X chromosome OS=Homo sapiens OX=9606 GN=RBMX PE=1 SV=3	34	16	29	8	391	42.3	10.05	41.39	103.3	75.9	138.8	83.2	115.5	83.2
P41218	Myeloid cell nuclear differentiation antigen OS=Homo sapiens OX=9606 GN=MNDA PE=1 SV=1	31	12	20	12	407	45.8	9.76	29.18	100.6	106.7	80	110.3	95.9	106.6
P06748	Nucleophosmin OS=Homo sapiens OX=9606 GN=NPM1 PE=1 SV=2	37	11	33	11	294	32.6	4.78	45.62	89.5	72.9	157.2	73	126.5	80.9
P10253	Lysosomal alpha-glucosidase OS=Homo sapiens OX=9606 GN=GAA PE=1 SV=4	17	11	15	11	952	105.3	6	30.69	66.3	68.4	133.8	77.6	162	91.9
O95834	Echinoderm microtubule-associated protein-like 2 OS=Homo sapiens OX=9606 GN=EML2 PE=1 SV=1	23	14	18	14	649	70.6	6.32	25.78	99.7	96.3	114.4	84.1	115.6	89.8
P27105	Erythrocyte band 7 integral membrane protein OS=Homo sapiens OX=9606 GN=STOM PE=1 SV=3	35	8	19	8	288	31.7	7.88	36.28	113.9	118.6	70.1	103.7	84.9	108.9
P01889	HLA class I histocompatibility antigen, B alpha chain OS=Homo sapiens OX=9606 GN=HLA-B PE=1 SV=3	35	9	26	4	362	40.4	5.85	42.86	107.4	98.9	104.4	101.1	88.9	99.3
O00231	26S proteasome non-ATPase regulatory subunit 11 OS=Homo sapiens OX=9606 GN=PSMD11 PE=1 SV=3	25	9	15	9	422	47.4	6.48	32.27	97.5	98.7	100.9	102	99.9	101
P48059	LIM and senescent cell antigen-like-containing domain protein 1 OS=Homo sapiens OX=9606 GN=LIMS1 PE=1 SV=4	33	9	18	5	325	37.2	8.05	39.47	122	100.1	94.9	95.8	95.1	92
Q07955	Serine/arginine-rich splicing factor 1 OS=Homo sapiens OX=9606 GN=SRSF1 PE=1 SV=2	40	10	27	10	248	27.7	10.36	40.18	98.3	91.2	122.4	88.7	111	88.4
O75390	Citrate synthase, mitochondrial OS=Homo sapiens OX=9606 GN=CS PE=1 SV=2	22	10	24	10	466	51.7	8.32	34.59	99.5	85.2	124.4	88.7	118.5	83.6
Q9UIJ7	GTP:AMP phosphotransferase AK3, mitochondrial OS=Homo sapiens OX=9606 GN=AK3 PE=1 SV=4	48	10	20	10	227	25.6	9.16	37.26	98	96.9	111.9	95.3	101	96.8
P22392	Nucleoside diphosphate kinase B OS=Homo sapiens OX=9606 GN=NME2 PE=1 SV=1	59	10	20	5	152	17.3	8.41	37.9	91	80.3	119.3	89.2	132.8	87.5
P11177	Pyruvate dehydrogenase E1 component subunit beta, mitochondrial OS=Homo sapiens OX=9606 GN=PDHB PE=1 SV=3	27	8	15	8	359	39.2	6.65	34.33	99.7	88.2	134	88.2	101.6	88.3
P63241	Eukaryotic translation initiation factor 5A-1 OS=Homo sapiens OX=9606 GN=EIF5A PE=1 SV=2	40	8	23	8	154	16.8	5.24	37.59	97.5	92.5	90.9	98.4	124.6	96.2
Q12797	Aspartyl/asparaginyl beta-hydroxylase OS=Homo sapiens OX=9606 GN=ASPH PE=1 SV=3	18	14	18	14	758	85.8	5.01	29.08	100.7	80.2	128.9	75.4	134.5	80.3
P62750	60S ribosomal protein L23a OS=Homo sapiens OX=9606 GN=RPL23A PE=1 SV=1	42	12	24	12	156	17.7	10.45	37.36	102.1	85.5	117.7	84.8	123.4	86.4
P50552	Vasodilator-stimulated phosphoprotein OS=Homo sapiens OX=9606 GN=VASP PE=1 SV=3	32	11	17	11	380	39.8	8.94	24.55	118.8	81.9	98.5	91.2	118	91.6
P36578	60S ribosomal protein L4 OS=Homo sapiens OX=9606 GN=RPL4 PE=1 SV=5	23	10	18	10	427	47.7	11.06	41.18	98.9	82.3	119.9	82.4	132.8	83.9
O14979	Heterogeneous nuclear ribonucleoprotein D-like OS=Homo sapiens OX=9606 GN=HNRNPDL PE=1 SV=3	22	11	20	10	420	46.4	9.57	30.65	98.1	91.6	118.9	91.1	114.6	85.7
P84085	ADP-ribosylation factor 5 OS=Homo sapiens OX=9606 GN=ARF5 PE=1 SV=2	41	7	21	3	180	20.5	6.79	41.84	88.4	85.4	115.9	91.3	128.8	90.3
Q9UH99	SUN domain-containing protein 2 OS=Homo sapiens OX=9606 GN=SUN2 PE=1 SV=3	29	13	21	12	717	80.3	6.73	20.81	117.5	92.7	88.6	96.4	101.6	103.2
P31937	3-hydroxyisobutyrate dehydrogenase, mitochondrial OS=Homo sapiens OX=9606 GN=HIBADH PE=1 SV=2	25	6	10	6	336	35.3	8.13	25.62	82.9	96.5	153.3	87.7	95.7	84
P62333	26S proteasome regulatory subunit 10B OS=Homo sapiens OX=9606 GN=PSMC6 PE=1 SV=1	29	11	17	11	389	44.1	7.49	30.29	92	103	105.3	99.1	99.8	100.7
P52597	Heterogeneous nuclear ribonucleoprotein F OS=Homo sapiens OX=9606 GN=HNRNPF PE=1 SV=3	26	9	21	7	415	45.6	5.58	50.07	96.8	76.5	119.6	76.7	152.9	77.5
P07738	Bisphosphoglycerate mutase OS=Homo sapiens OX=9606 GN=BPGM PE=1 SV=2	37	8	17	8	259	30	6.54	22.63	88.3	148.2	65.4	142.8	57.9	97.4
Q53GQ0	Very-long-chain 3-oxoacyl-CoA reductase OS=Homo sapiens OX=9606 GN=HSD17B12 PE=1 SV=2	27	9	16	9	312	34.3	9.32	35.79	107.1	86.7	111.3	95.2	117.7	82
Q15293	Reticulocalbin-1 OS=Homo sapiens OX=9606 GN=RCN1 PE=1 SV=1	29	9	18	9	331	38.9	5	42.44	90.6	86.8	140.6	93	100.6	88.3
Q00577	Transcriptional activator protein Pur-alpha OS=Homo sapiens OX=9606 GN=PURA PE=1 SV=2	37	8	13	8	322	34.9	6.44	20.78	101.2	101.8	107.9	94.6	109.3	85.1
Q9P2J5	Leucine--tRNA ligase, cytoplasmic OS=Homo sapiens OX=9606 GN=LARS PE=1 SV=2	14	14	15	14	1176	134.4	7.3	20.09	85	97.7	123.1	91.7	111.4	91.1
P02763	Alpha-1-acid glycoprotein 1 OS=Homo sapiens OX=9606 GN=ORM1 PE=1 SV=1	34	6	31	4	201	23.5	5.02	73.72	80.9	102.9	69.6	136.3	72.1	138.1
O60313	Dynamin-like 120 kDa protein, mitochondrial OS=Homo sapiens OX=9606 GN=OPA1 PE=1 SV=3	17	16	19	16	960	111.6	7.87	25.52	100.2	96.1	105.1	102.5	100.1	96
P22748	Carbonic anhydrase 4 OS=Homo sapiens OX=9606 GN=CA4 PE=1 SV=2	28	9	18	9	312	35	7.83	32.33	146.8	135.3	54.8	106.5	54.4	102.2
P36542	ATP synthase subunit gamma, mitochondrial OS=Homo sapiens OX=9606 GN=ATP5F1C PE=1 SV=1	26	8	16	8	298	33	9.22	34.34	103.9	88.2	124	90.1	111.2	82.5
Q14141	Septin-6 OS=Homo sapiens OX=9606 GN=SEPTIN6 PE=1 SV=4	34	11	16	6	434	49.7	6.67	30.41	106.4	93.4	114.9	92.2	99.2	93.9
P48147	Prolyl endopeptidase OS=Homo sapiens OX=9606 GN=PREP PE=1 SV=2	23	13	14	13	710	80.6	5.86	31.61	109.7	103.1	101.7	100.7	93.2	91.6
P02533	Keratin, type I cytoskeletal 14 OS=Homo sapiens OX=9606 GN=KRT14 PE=1 SV=4	20	12	30	1	472	51.5	5.16	47.61	158	145.7	54.2	62.5	48.2	131.4
Q15404	Ras suppressor protein 1 OS=Homo sapiens OX=9606 GN=RSU1 PE=1 SV=3	28	9	24	9	277	31.5	8.65	32.95	118.8	123.5	79.9	106.7	79	92.1
Q9UNF0	Protein kinase C and casein kinase substrate in neurons protein 2 OS=Homo sapiens OX=9606 GN=PACSIN2 PE=1 SV=2	24	10	17	10	486	55.7	5.2	31.28	105.7	101.5	123.8	88.8	94.5	85.6
Q9Y3F4	Serine-threonine kinase receptor-associated protein OS=Homo sapiens OX=9606 GN=STRAP PE=1 SV=1	40	11	13	11	350	38.4	5.12	25.64	98.9	99	106.8	100.1	98.9	96.3
Q9H4G0	Band 4.1-like protein 1 OS=Homo sapiens OX=9606 GN=EPB41L1 PE=1 SV=2	16	14	19	11	881	98.4	5.62	23.53	94.5	97.1	117.8	86.2	114.7	89.7
P61604	10 kDa heat shock protein, mitochondrial OS=Homo sapiens OX=9606 GN=HSPE1 PE=1 SV=2	63	8	38	8	102	10.9	8.92	55.19	85.7	64	185.4	72.5	112.9	79.4
Q9UKV3	Apoptotic chromatin condensation inducer in the nucleus OS=Homo sapiens OX=9606 GN=ACIN1 PE=1 SV=2	13	13	18	13	1341	151.8	6.43	22.82	94.6	93.6	121.5	90.7	111	88.5
P52943	Cysteine-rich protein 2 OS=Homo sapiens OX=9606 GN=CRIP2 PE=1 SV=1	48	8	18	7	208	22.5	8.72	35.5	138.2	116.9	89.6	88.9	84.1	82.3
P62906	60S ribosomal protein L10a OS=Homo sapiens OX=9606 GN=RPL10A PE=1 SV=2	27	6	24	6	217	24.8	9.94	42.49	100.4	79.1	115.7	81.8	136.2	86.8
Q13428	Treacle protein OS=Homo sapiens OX=9606 GN=TCOF1 PE=1 SV=3	12	16	17	16	1488	152	9.04	28.66	94.2	74	146.6	79.2	123.3	82.7
P02652	Apolipoprotein A-II OS=Homo sapiens OX=9606 GN=APOA2 PE=1 SV=1	41	5	37	5	100	11.2	6.62	73.47	77.9	111.6	58.2	122.3	71.4	158.5
O95340	Bifunctional 3'-phosphoadenosine 5'-phosphosulfate synthase 2 OS=Homo sapiens OX=9606 GN=PAPSS2 PE=1 SV=2	22	12	16	11	614	69.5	8.03	25.23	111	127.2	87.5	107.6	76.3	90.3
P41250	Glycine--tRNA ligase OS=Homo sapiens OX=9606 GN=GARS1 PE=1 SV=3	18	13	18	13	739	83.1	7.03	20.68	92.3	81.7	113.1	90.1	129.2	93.7
O14745	Na(+)/H(+) exchange regulatory cofactor NHE-RF1 OS=Homo sapiens OX=9606 GN=SLC9A3R1 PE=1 SV=4	38	10	19	10	358	38.8	5.77	21.83	96.1	86	100.5	85.7	145.3	86.5
P54577	Tyrosine--tRNA ligase, cytoplasmic OS=Homo sapiens OX=9606 GN=YARS PE=1 SV=4	27	15	18	15	528	59.1	7.05	23.58	84.2	71.7	144.8	86.7	130.8	81.8
Q9Y5X3	Sorting nexin-5 OS=Homo sapiens OX=9606 GN=SNX5 PE=1 SV=1	35	13	17	12	404	46.8	6.76	25.08	103.8	81.3	109.3	100	114.9	90.7
P23588	Eukaryotic translation initiation factor 4B OS=Homo sapiens OX=9606 GN=EIF4B PE=1 SV=2	25	12	16	12	611	69.1	5.73	25.33	110.4	92	104.9	87.7	117.4	87.6
P62140	Serine/threonine-protein phosphatase PP1-beta catalytic subunit OS=Homo sapiens OX=9606 GN=PPP1CB PE=1 SV=3	34	9	17	2	327	37.2	6.19	33.35	100.6	113.9	83.4	113.8	85.9	102.3
P28482	Mitogen-activated protein kinase 1 OS=Homo sapiens OX=9606 GN=MAPK1 PE=1 SV=3	36	13	18	9	360	41.4	6.98	35.73	104.1	92.6	111.5	97.9	104.7	89.1
P62241	40S ribosomal protein S8 OS=Homo sapiens OX=9606 GN=RPS8 PE=1 SV=2	48	8	17	8	208	24.2	10.32	39.63	96	82	118.6	86.5	126.1	90.8
Q9Y281	Cofilin-2 OS=Homo sapiens OX=9606 GN=CFL2 PE=1 SV=1	39	7	21	3	166	18.7	7.88	43.06	127.1	123.1	71.5	102.8	82	93.5
Q5T4S7	E3 ubiquitin-protein ligase UBR4 OS=Homo sapiens OX=9606 GN=UBR4 PE=1 SV=1	3	17	17	17	5183	573.5	6.04	22.93	96.3	98.7	112.7	93	107.7	91.7
P84095	Rho-related GTP-binding protein RhoG OS=Homo sapiens OX=9606 GN=RHOG PE=1 SV=1	54	8	12	7	191	21.3	8.12	25.81	107.2	98.4	89	104.2	102.3	98.9
P14923	Junction plakoglobin OS=Homo sapiens OX=9606 GN=JUP PE=1 SV=3	19	10	14	8	745	81.7	6.14	27.91	102.8	101.1	110.5	96.9	100.1	88.6
A0M8Q6	Immunoglobulin lambda constant 7 OS=Homo sapiens OX=9606 GN=IGLC7 PE=1 SV=3	56	5	61	2	106	11.2	8.29	157.63	81	93.7	106.1	116.9	85.5	116.7
P09622	Dihydrolipoyl dehydrogenase, mitochondrial OS=Homo sapiens OX=9606 GN=DLD PE=1 SV=2	25	11	15	11	509	54.1	7.85	21.81	90.2	81.1	148.1	75.4	126	79.1
Q9UI08	Ena/VASP-like protein OS=Homo sapiens OX=9606 GN=EVL PE=1 SV=2	34	13	16	13	416	44.6	8.84	14.69	120.1	106	97.9	102.9	79.7	93.4
P61586	Transforming protein RhoA OS=Homo sapiens OX=9606 GN=RHOA PE=1 SV=1	32	7	23	3	193	21.8	6.1	30.16	109.6	89.8	109.7	95	108.7	87.2
Q9Y266	Nuclear migration protein nudC OS=Homo sapiens OX=9606 GN=NUDC PE=1 SV=1	38	14	15	14	331	38.2	5.38	24.45	88.4	94.8	140	87.3	100.3	89.2
P08174	Complement decay-accelerating factor OS=Homo sapiens OX=9606 GN=CD55 PE=1 SV=4	31	11	19	11	381	41.4	7.59	34.18	136.5	110.2	74.8	86	109.8	82.7
Q6NUK1	Calcium-binding mitochondrial carrier protein SCaMC-1 OS=Homo sapiens OX=9606 GN=SLC25A24 PE=1 SV=2	24	14	17	14	477	53.3	6.33	28.85	106.7	95.2	121.5	85.2	111.4	80
Q9Y2X3	Nucleolar protein 58 OS=Homo sapiens OX=9606 GN=NOP58 PE=1 SV=1	25	11	15	11	529	59.5	8.92	21.65	95.3	98.7	115	85.9	112.9	92.1
Q00325	Phosphate carrier protein, mitochondrial OS=Homo sapiens OX=9606 GN=SLC25A3 PE=1 SV=2	25	11	27	11	362	40.1	9.38	36.11	95.6	85.4	121.9	90	118.9	88.2
Q13185	Chromobox protein homolog 3 OS=Homo sapiens OX=9606 GN=CBX3 PE=1 SV=4	40	7	18	6	183	20.8	5.33	27.83	93.1	81.8	124	85.5	136.2	79.4
P50991	T-complex protein 1 subunit delta OS=Homo sapiens OX=9606 GN=CCT4 PE=1 SV=4	27	13	17	12	539	57.9	7.83	27	103.4	91	116.4	92.1	106.5	90.6
Q6P996	Pyridoxal-dependent decarboxylase domain-containing protein 1 OS=Homo sapiens OX=9606 GN=PDXDC1 PE=1 SV=2	22	14	15	14	788	86.7	5.38	14.86	86.7	82.6	137.9	83.4	129.9	79.6
Q15424	Scaffold attachment factor B1 OS=Homo sapiens OX=9606 GN=SAFB PE=1 SV=4	15	10	14	6	915	102.6	5.47	18.07	100.8	77	136.9	73.4	133.5	78.4
P51911	Calponin-1 OS=Homo sapiens OX=9606 GN=CNN1 PE=1 SV=2	45	9	18	8	297	33.2	9.07	19.18	119.5	122.5	81.5	99.8	82.3	94.2
P11387	DNA topoisomerase 1 OS=Homo sapiens OX=9606 GN=TOP1 PE=1 SV=2	20	14	21	14	765	90.7	9.31	27.96	100.2	90.5	106.8	94.8	115.4	92.4
Q9BQS8	FYVE and coiled-coil domain-containing protein 1 OS=Homo sapiens OX=9606 GN=FYCO1 PE=1 SV=3	11	14	14	14	1478	166.9	4.92	21.87	99	106.9	104	87.2	118.7	84.2
Q14165	Malectin OS=Homo sapiens OX=9606 GN=MLEC PE=1 SV=1	37	10	20	10	292	32.2	5.41	33.95	84.3	80	116.2	77.6	158.5	83.4
P35637	RNA-binding protein FUS OS=Homo sapiens OX=9606 GN=FUS PE=1 SV=1	14	8	24	6	526	53.4	9.36	35.67	95	78.2	128.5	83.9	136.7	77.6
P45880	Voltage-dependent anion-selective channel protein 2 OS=Homo sapiens OX=9606 GN=VDAC2 PE=1 SV=2	28	8	18	8	294	31.5	7.56	32.88	105.7	92.3	114.1	89	110.2	88.6
O75131	Copine-3 OS=Homo sapiens OX=9606 GN=CPNE3 PE=1 SV=1	18	10	18	9	537	60.1	5.85	32.9	107.4	97.9	104.2	91	109.7	89.9
P50225	Sulfotransferase 1A1 OS=Homo sapiens OX=9606 GN=SULT1A1 PE=1 SV=3	46	9	16	6	295	34.1	6.62	33.51	117.1	124.6	62.8	110.9	89	95.6
P52907	F-actin-capping protein subunit alpha-1 OS=Homo sapiens OX=9606 GN=CAPZA1 PE=1 SV=3	32	6	20	5	286	32.9	5.69	27.99	99.4	90.1	120.7	93.4	105.2	91.2
P43304	Glycerol-3-phosphate dehydrogenase, mitochondrial OS=Homo sapiens OX=9606 GN=GPD2 PE=1 SV=3	22	15	15	15	727	80.8	7.69	22.11	91.3	86.9	144.2	97.6	95.6	84.5
Q16401	26S proteasome non-ATPase regulatory subunit 5 OS=Homo sapiens OX=9606 GN=PSMD5 PE=1 SV=3	25	11	12	11	504	56.2	5.48	22.71	92.4	96.3	132.9	95.1	97.8	85.5
Q13310	Polyadenylate-binding protein 4 OS=Homo sapiens OX=9606 GN=PABPC4 PE=1 SV=1	19	11	16	7	644	70.7	9.26	26.16	88.9	85	138.7	77.7	125.4	84.1
Q9Y277	Voltage-dependent anion-selective channel protein 3 OS=Homo sapiens OX=9606 GN=VDAC3 PE=1 SV=1	32	9	18	8	283	30.6	8.66	39.1	94.2	89.5	129.1	86.4	115.9	84.9
P15531	Nucleoside diphosphate kinase A OS=Homo sapiens OX=9606 GN=NME1 PE=1 SV=1	58	9	14	4	152	17.1	6.19	35.3	58.6	66.4	142.9	98.8	143.7	89.7
P31949	Protein S100-A11 OS=Homo sapiens OX=9606 GN=S100A11 PE=1 SV=2	56	7	20	7	105	11.7	7.12	44.3	93.9	74.3	135.7	75.8	139.6	80.7
P13798	Acylamino-acid-releasing enzyme OS=Homo sapiens OX=9606 GN=APEH PE=1 SV=4	14	11	14	11	732	81.2	5.48	24.91	86.2	102.1	90.1	108.6	115.6	97.5
Q9P0L0	Vesicle-associated membrane protein-associated protein A OS=Homo sapiens OX=9606 GN=VAPA PE=1 SV=3	43	10	18	9	249	27.9	8.62	36.26	96.3	85.6	124	87	124.8	82.4
P29590	Protein PML OS=Homo sapiens OX=9606 GN=PML PE=1 SV=3	19	15	16	15	882	97.5	6.21	20.38	112.8	89.6	121.6	96.2	97.1	82.7
O95865	N(G),N(G)-dimethylarginine dimethylaminohydrolase 2 OS=Homo sapiens OX=9606 GN=DDAH2 PE=1 SV=1	38	9	19	8	285	29.6	6.01	37.91	109.5	107	89	96.2	96.6	101.7
O43272	Proline dehydrogenase 1, mitochondrial OS=Homo sapiens OX=9606 GN=PRODH PE=1 SV=3	30	12	17	12	600	68	7.87	30.49	81.4	64	137.3	63.5	178.5	75.3
Q13308	Inactive tyrosine-protein kinase 7 OS=Homo sapiens OX=9606 GN=PTK7 PE=1 SV=2	18	14	17	14	1070	118.3	7.09	21.58	83.2	81.6	136.3	84.6	129.1	85.2
P10321	HLA class I histocompatibility antigen, C alpha chain OS=Homo sapiens OX=9606 GN=HLA-C PE=1 SV=3	27	7	18	3	366	40.6	6.04	22.98	126.1	104.5	109.3	105.3	70	84.8
Q96C19	EF-hand domain-containing protein D2 OS=Homo sapiens OX=9606 GN=EFHD2 PE=1 SV=1	36	9	14	7	240	26.7	5.2	26.57	110	103.7	106.8	105	82.2	92.4
Q13451	Peptidyl-prolyl cis-trans isomerase FKBP5 OS=Homo sapiens OX=9606 GN=FKBP5 PE=1 SV=2	38	13	17	13	457	51.2	5.9	10.13	84.2	85.6	135	97.6	93.6	104
O94905	Erlin-2 OS=Homo sapiens OX=9606 GN=ERLIN2 PE=1 SV=1	33	10	18	8	339	37.8	5.62	26.4	94.7	93.2	124.7	90.5	110.7	86.2
P55884	Eukaryotic translation initiation factor 3 subunit B OS=Homo sapiens OX=9606 GN=EIF3B PE=1 SV=3	21	12	15	12	814	92.4	5	25.04	99.8	95.7	104.3	94.3	112.2	93.8
P32456	Guanylate-binding protein 2 OS=Homo sapiens OX=9606 GN=GBP2 PE=1 SV=3	24	13	17	10	591	67.2	5.71	18.89	98.2	103.5	118.5	101	84	94.9
P61106	Ras-related protein Rab-14 OS=Homo sapiens OX=9606 GN=RAB14 PE=1 SV=4	63	11	18	10	215	23.9	6.21	38.76	105.5	99.7	86.3	99.9	105	103.5
P30050	60S ribosomal protein L12 OS=Homo sapiens OX=9606 GN=RPL12 PE=1 SV=1	49	6	13	6	165	17.8	9.42	32.53	95.2	86.5	113.3	84.3	132.4	88.3
Q99460	26S proteasome non-ATPase regulatory subunit 1 OS=Homo sapiens OX=9606 GN=PSMD1 PE=1 SV=2	17	13	17	13	953	105.8	5.39	20.37	87.4	91.2	109.5	100.1	112	99.8
Q15833	Syntaxin-binding protein 2 OS=Homo sapiens OX=9606 GN=STXBP2 PE=1 SV=2	26	13	17	12	593	66.4	6.55	26.95	113.7	105.6	85.5	103.2	101.1	91
Q14914	Prostaglandin reductase 1 OS=Homo sapiens OX=9606 GN=PTGR1 PE=1 SV=2	33	10	19	10	329	35.8	8.29	28.84	89.2	85.9	131.1	77.7	137.3	78.8
P28799	Progranulin OS=Homo sapiens OX=9606 GN=GRN PE=1 SV=2	25	10	13	10	593	63.5	6.83	17.23	121.6	58.9	131.6	64.2	152.7	71.1
Q9ULV4	Coronin-1C OS=Homo sapiens OX=9606 GN=CORO1C PE=1 SV=1	25	12	15	12	474	53.2	7.08	31.95	104.7	102.6	92.2	112.1	87.8	100.7
Q96HN2	Adenosylhomocysteinase 3 OS=Homo sapiens OX=9606 GN=AHCYL2 PE=1 SV=1	23	14	21	3	611	66.7	7.36	23.68	91.5	93.6	120.7	80.8	133.2	80.2
P14317	Hematopoietic lineage cell-specific protein OS=Homo sapiens OX=9606 GN=HCLS1 PE=1 SV=3	30	12	20	12	486	54	4.81	19.39	115.7	92.8	93.1	103.3	91.7	103.4
P33121	Long-chain-fatty-acid--CoA ligase 1 OS=Homo sapiens OX=9606 GN=ACSL1 PE=1 SV=1	18	12	18	11	698	77.9	7.15	28.3	109	102.9	102.4	111.8	80.8	93.1
P36955	Pigment epithelium-derived factor OS=Homo sapiens OX=9606 GN=SERPINF1 PE=1 SV=4	20	9	17	9	418	46.3	6.38	26.6	114.8	119.3	71.2	104.9	77.2	112.6
O00534	von Willebrand factor A domain-containing protein 5A OS=Homo sapiens OX=9606 GN=VWA5A PE=2 SV=2	20	13	15	13	786	86.4	6.58	18.29	97.6	100.2	98.6	99	107.6	97
Q8TAQ2	SWI/SNF complex subunit SMARCC2 OS=Homo sapiens OX=9606 GN=SMARCC2 PE=1 SV=1	15	14	16	11	1214	132.8	5.69	21.58	89.6	90.8	122.2	83.3	125.5	88.6
Q9NQR4	Omega-amidase NIT2 OS=Homo sapiens OX=9606 GN=NIT2 PE=1 SV=1	39	10	16	10	276	30.6	7.21	19.3	103.6	92.6	119.2	92.4	113	79.2
P22570	NADPH:adrenodoxin oxidoreductase, mitochondrial OS=Homo sapiens OX=9606 GN=FDXR PE=1 SV=3	25	11	17	11	491	53.8	8.44	25.86	80.8	79	160.6	89.2	102.1	88.2
Q86VB7	Scavenger receptor cysteine-rich type 1 protein M130 OS=Homo sapiens OX=9606 GN=CD163 PE=1 SV=2	11	11	14	11	1156	125.4	5.95	26.45	103.9	79.6	107.6	96.2	124.5	88.2
P62979	Ubiquitin-40S ribosomal protein S27a OS=Homo sapiens OX=9606 GN=RPS27A PE=1 SV=2	42	6	87	1	156	18	9.64	163.3	101.7	103.5	100.5	97.2	105.2	91.8
P62136	Serine/threonine-protein phosphatase PP1-alpha catalytic subunit OS=Homo sapiens OX=9606 GN=PPP1CA PE=1 SV=1	33	9	18	2	330	37.5	6.33	29.87	98.1	105.9	101.4	97.2	102	95.5
P25788	Proteasome subunit alpha type-3 OS=Homo sapiens OX=9606 GN=PSMA3 PE=1 SV=2	38	12	22	12	255	28.4	5.33	38.84	99.8	93.9	116.5	93.3	106.6	89.9
Q92626	Peroxidasin homolog OS=Homo sapiens OX=9606 GN=PXDN PE=1 SV=2	11	11	15	11	1479	165.2	7.17	25.47	113	105.6	111.3	110.2	72.2	87.7
P62070	Ras-related protein R-Ras2 OS=Homo sapiens OX=9606 GN=RRAS2 PE=1 SV=1	35	6	12	4	204	23.4	6.01	18.83	111.2	110	77.4	100	114.5	86.9
P35573	Glycogen debranching enzyme OS=Homo sapiens OX=9606 GN=AGL PE=1 SV=3	12	16	18	16	1532	174.7	6.76	19.25	89.4	85	137.4	87.3	116.8	84.1
Q13162	Peroxiredoxin-4 OS=Homo sapiens OX=9606 GN=PRDX4 PE=1 SV=1	39	7	21	6	271	30.5	6.29	39.78	100.6	84.3	135.7	85	106.8	87.6
P05166	Propionyl-CoA carboxylase beta chain, mitochondrial OS=Homo sapiens OX=9606 GN=PCCB PE=1 SV=3	20	8	12	8	539	58.2	7.64	20.5	95	89.5	147	88.4	96.2	84
P22102	Trifunctional purine biosynthetic protein adenosine-3 OS=Homo sapiens OX=9606 GN=GART PE=1 SV=1	14	12	18	12	1010	107.7	6.7	20.03	95.7	98	111.6	95.7	107.8	91.3
Q9UBC2	Epidermal growth factor receptor substrate 15-like 1 OS=Homo sapiens OX=9606 GN=EPS15L1 PE=1 SV=1	16	11	11	11	864	94.2	5.11	21.52	99.1	114.7	90.6	105.4	92.8	97.5
Q9HAV0	Guanine nucleotide-binding protein subunit beta-4 OS=Homo sapiens OX=9606 GN=GNB4 PE=1 SV=3	26	8	27	3	340	37.5	6	47.36	111.7	94.2	105.4	109	88.5	91.2
P54727	UV excision repair protein RAD23 homolog B OS=Homo sapiens OX=9606 GN=RAD23B PE=1 SV=1	19	9	17	7	409	43.1	4.84	30.99	101.7	99.5	99.4	92.6	116.8	90
Q9Y6Y8	SEC23-interacting protein OS=Homo sapiens OX=9606 GN=SEC23IP PE=1 SV=1	13	12	20	12	1000	111	5.54	23.3	98.1	92.6	103.4	87.4	129.5	89
P55795	Heterogeneous nuclear ribonucleoprotein H2 OS=Homo sapiens OX=9606 GN=HNRNPH2 PE=1 SV=1	25	11	23	3	449	49.2	6.3	37.14	91.9	90.2	119.9	95.2	101.9	100.8
P02748	Complement component C9 OS=Homo sapiens OX=9606 GN=C9 PE=1 SV=2	19	12	15	12	559	63.1	5.59	29.97	87.8	94.2	84.8	116.8	83.2	133.2
P46060	Ran GTPase-activating protein 1 OS=Homo sapiens OX=9606 GN=RANGAP1 PE=1 SV=1	21	11	13	11	587	63.5	4.68	23.34	92.9	88.4	126.5	90.2	112.1	89.8
O95202	Mitochondrial proton/calcium exchanger protein OS=Homo sapiens OX=9606 GN=LETM1 PE=1 SV=1	16	10	12	10	739	83.3	6.7	22.41	95.3	108.7	120.9	87.6	100.7	86.7
Q8N163	Cell cycle and apoptosis regulator protein 2 OS=Homo sapiens OX=9606 GN=CCAR2 PE=1 SV=2	15	13	18	13	923	102.8	5.22	18.7	104.3	90.9	109.3	87.9	119.6	88
O43143	Pre-mRNA-splicing factor ATP-dependent RNA helicase DHX15 OS=Homo sapiens OX=9606 GN=DHX15 PE=1 SV=2	15	11	16	11	795	90.9	7.46	25.64	92	94.1	125.9	85.2	115.5	87.3
P49321	Nuclear autoantigenic sperm protein OS=Homo sapiens OX=9606 GN=NASP PE=1 SV=2	20	12	14	12	788	85.2	4.3	19.74	78.3	83.4	176.2	81.5	100.6	79.9
P23946	Chymase OS=Homo sapiens OX=9606 GN=CMA1 PE=1 SV=1	31	6	16	6	247	27.3	9.29	20.59	66.9	72.5	69.5	88	207.6	95.5
P09110	3-ketoacyl-CoA thiolase, peroxisomal OS=Homo sapiens OX=9606 GN=ACAA1 PE=1 SV=2	34	10	12	10	424	44.3	8.44	19.88	89.4	110.9	79.5	115	106.7	98.5
Q01105	Protein SET OS=Homo sapiens OX=9606 GN=SET PE=1 SV=3	32	8	18	8	290	33.5	4.32	37.04	101.8	84	105.2	88.7	126.2	94.1
P60953	Cell division control protein 42 homolog OS=Homo sapiens OX=9606 GN=CDC42 PE=1 SV=2	37	7	21	6	191	21.2	6.55	38.26	103	88.7	122	86.8	116.9	82.5
P63000	Ras-related C3 botulinum toxin substrate 1 OS=Homo sapiens OX=9606 GN=RAC1 PE=1 SV=1	41	7	19	3	192	21.4	8.5	36.57	113.8	102.9	88.3	101.5	97.2	96.3
P07205	Phosphoglycerate kinase 2 OS=Homo sapiens OX=9606 GN=PGK2 PE=1 SV=3	15	7	29	2	417	44.8	8.54	49.89	96	92.3	134.7	87.2	109.4	80.4
P42167	Lamina-associated polypeptide 2, isoforms beta/gamma OS=Homo sapiens OX=9606 GN=TMPO PE=1 SV=2	31	10	16	10	454	50.6	9.38	20.33	97.7	91.3	133.9	86.1	108.9	82.1
P43034	Platelet-activating factor acetylhydrolase IB subunit alpha OS=Homo sapiens OX=9606 GN=PAFAH1B1 PE=1 SV=2	30	10	11	10	410	46.6	7.37	15.11	109.2	98.6	90.6	104.3	102.7	94.6
Q92878	DNA repair protein RAD50 OS=Homo sapiens OX=9606 GN=RAD50 PE=1 SV=1	13	18	18	18	1312	153.8	6.89	21.13	100.1	102	118.9	87.6	102.3	89.2
P21964	Catechol O-methyltransferase OS=Homo sapiens OX=9606 GN=COMT PE=1 SV=2	21	7	17	7	271	30	5.47	36.06	109.1	96.5	94	88.1	118.7	93.6
Q63HN8	E3 ubiquitin-protein ligase RNF213 OS=Homo sapiens OX=9606 GN=RNF213 PE=1 SV=3	4	17	17	17	5207	591	6.48	18.11	94.3	81.7	126.3	93.2	110.3	94.2
P35222	Catenin beta-1 OS=Homo sapiens OX=9606 GN=CTNNB1 PE=1 SV=1	16	11	17	9	781	85.4	5.86	25.14	107.1	109.1	107.3	97	86.8	92.7
P31930	Cytochrome b-c1 complex subunit 1, mitochondrial OS=Homo sapiens OX=9606 GN=UQCRC1 PE=1 SV=3	18	7	13	7	480	52.6	6.37	28.53	99.4	107.3	114	93.7	98.4	87.1
O75821	Eukaryotic translation initiation factor 3 subunit G OS=Homo sapiens OX=9606 GN=EIF3G PE=1 SV=2	30	8	13	8	320	35.6	6.13	22.33	99.1	89	106.7	93.6	119.4	92.2
Q9NY33	Dipeptidyl peptidase 3 OS=Homo sapiens OX=9606 GN=DPP3 PE=1 SV=2	17	12	17	12	737	82.5	5.1	26.47	101.3	97	97.1	99.4	111.9	93.3
Q9P2R3	Rabankyrin-5 OS=Homo sapiens OX=9606 GN=ANKFY1 PE=1 SV=2	12	12	12	12	1169	128.3	6.1	19.13	106.5	99.5	98.2	92.7	111.1	92
P60900	Proteasome subunit alpha type-6 OS=Homo sapiens OX=9606 GN=PSMA6 PE=1 SV=1	36	8	15	8	246	27.4	6.76	24.37	95.5	93.7	119.2	97.1	104.9	89.5
P16435	NADPH--cytochrome P450 reductase OS=Homo sapiens OX=9606 GN=POR PE=1 SV=2	17	11	16	11	677	76.6	5.58	26.17	100.4	101.6	128.3	82.4	103.2	84.1
Q9Y5K6	CD2-associated protein OS=Homo sapiens OX=9606 GN=CD2AP PE=1 SV=1	21	10	13	10	639	71.4	6.4	20.75	99.7	87.8	121.2	92.9	109.7	88.6
P23786	Carnitine O-palmitoyltransferase 2, mitochondrial OS=Homo sapiens OX=9606 GN=CPT2 PE=1 SV=2	20	11	14	11	658	73.7	8.18	22.15	87.1	82.7	127.6	87.9	118.6	96.1
Q92974	Rho guanine nucleotide exchange factor 2 OS=Homo sapiens OX=9606 GN=ARHGEF2 PE=1 SV=4	15	13	16	13	986	111.5	7.27	20.38	86.6	86.2	107.1	84.4	152.8	82.9
Q13838	Spliceosome RNA helicase DDX39B OS=Homo sapiens OX=9606 GN=DDX39B PE=1 SV=1	25	10	20	4	428	49	5.67	27.25	97.3	90.3	135.4	84	113.4	79.7
P26440	Isovaleryl-CoA dehydrogenase, mitochondrial OS=Homo sapiens OX=9606 GN=IVD PE=1 SV=2	24	10	15	10	426	46.6	8.05	28.15	92.6	81.8	105.6	84.5	150.7	84.7
P04233	HLA class II histocompatibility antigen gamma chain OS=Homo sapiens OX=9606 GN=CD74 PE=1 SV=3	35	9	22	9	296	33.5	8.44	26.88	87.2	83.6	149.9	102.3	92.4	84.7
P63279	SUMO-conjugating enzyme UBC9 OS=Homo sapiens OX=9606 GN=UBE2I PE=1 SV=1	35	7	15	7	158	18	8.66	27.76	92.5	97	127.6	95.8	96.7	90.4
Q9NTI5	Sister chromatid cohesion protein PDS5 homolog B OS=Homo sapiens OX=9606 GN=PDS5B PE=1 SV=1	10	13	15	10	1447	164.6	8.47	23.39	103.5	104.3	110.1	94.1	101.5	86.5
P43686	26S proteasome regulatory subunit 6B OS=Homo sapiens OX=9606 GN=PSMC4 PE=1 SV=2	27	11	16	11	418	47.3	5.21	23.66	92.5	99.4	105.4	96.7	113.3	92.7
P17931	Galectin-3 OS=Homo sapiens OX=9606 GN=LGALS3 PE=1 SV=5	25	6	29	6	250	26.1	8.56	63.12	93.5	76.2	136.3	91.2	113.8	89.1
Q8IUX7	Adipocyte enhancer-binding protein 1 OS=Homo sapiens OX=9606 GN=AEBP1 PE=1 SV=1	12	12	14	12	1158	130.8	5.11	17.28	107.6	111.5	91	106.2	82.9	101
P27487	Dipeptidyl peptidase 4 OS=Homo sapiens OX=9606 GN=DPP4 PE=1 SV=2	18	13	20	13	766	88.2	6.04	26.72	81	79.6	144.2	76.8	137.3	81.2
A0MZ66	Shootin-1 OS=Homo sapiens OX=9606 GN=SHTN1 PE=1 SV=4	22	11	13	11	631	71.6	5.33	18.14	88.3	86.3	117.8	93.1	123.9	90.6
P55265	Double-stranded RNA-specific adenosine deaminase OS=Homo sapiens OX=9606 GN=ADAR PE=1 SV=4	10	13	15	13	1226	136	8.65	24.59	95.1	79.8	129.9	86	129.5	79.7
P08311	Cathepsin G OS=Homo sapiens OX=9606 GN=CTSG PE=1 SV=2	38	8	20	8	255	28.8	11.19	35.63	105.7	105.7	79.6	95.1	110.3	103.6
Q9NQC3	Reticulon-4 OS=Homo sapiens OX=9606 GN=RTN4 PE=1 SV=2	11	7	15	7	1192	129.9	4.5	23.01	103.9	109.6	79.6	109.4	89.8	107.6
P25789	Proteasome subunit alpha type-4 OS=Homo sapiens OX=9606 GN=PSMA4 PE=1 SV=1	36	9	15	9	261	29.5	7.72	23.5	99.1	94.1	117.4	97.5	98	93.9
P62195	26S proteasome regulatory subunit 8 OS=Homo sapiens OX=9606 GN=PSMC5 PE=1 SV=1	33	10	17	10	406	45.6	7.55	17.17	92.6	101.1	107.2	99.9	104	95.2
O60701	UDP-glucose 6-dehydrogenase OS=Homo sapiens OX=9606 GN=UGDH PE=1 SV=1	22	10	15	10	494	55	7.12	23.16	96.7	114.3	120.5	65.1	129	74.4
Q02878	60S ribosomal protein L6 OS=Homo sapiens OX=9606 GN=RPL6 PE=1 SV=3	23	8	24	8	288	32.7	10.58	48.51	97.5	77.8	118.4	81.6	140.1	84.5
P26196	Probable ATP-dependent RNA helicase DDX6 OS=Homo sapiens OX=9606 GN=DDX6 PE=1 SV=2	26	11	14	11	483	54.4	8.66	19.23	98	97.5	111	95	112	86.4
Q63ZY3	KN motif and ankyrin repeat domain-containing protein 2 OS=Homo sapiens OX=9606 GN=KANK2 PE=1 SV=1	16	10	13	10	851	91.1	5.63	13.19	108	112.9	82.8	113.9	80.6	101.7
Q15436	Protein transport protein Sec23A OS=Homo sapiens OX=9606 GN=SEC23A PE=1 SV=2	16	10	17	9	765	86.1	7.08	19.93	93.1	91.7	120.1	86.3	117.4	91.4
P46783	40S ribosomal protein S10 OS=Homo sapiens OX=9606 GN=RPS10 PE=1 SV=1	56	12	28	11	165	18.9	10.15	52.95	98.5	82.9	124.6	83.6	126.7	83.6
Q13011	Delta(3,5)-Delta(2,4)-dienoyl-CoA isomerase, mitochondrial OS=Homo sapiens OX=9606 GN=ECH1 PE=1 SV=2	28	9	16	9	328	35.8	8	26.17	102.3	83.8	110.8	87.7	130.1	85.3
A0FGR8	Extended synaptotagmin-2 OS=Homo sapiens OX=9606 GN=ESYT2 PE=1 SV=1	15	12	13	11	921	102.3	9.26	29.16	95.2	100.3	110.8	89.7	113.9	90.1
P08754	Guanine nucleotide-binding protein G(i) subunit alpha OS=Homo sapiens OX=9606 GN=GNAI3 PE=1 SV=3	25	8	17	3	354	40.5	5.69	31.29	94.8	89.6	113.4	91.3	121.8	89.1
P16671	Platelet glycoprotein 4 OS=Homo sapiens OX=9606 GN=CD36 PE=1 SV=2	17	8	14	8	472	53	7.96	31.87	149.4	146.8	48.7	105.3	47	102.8
P20340	Ras-related protein Rab-6A OS=Homo sapiens OX=9606 GN=RAB6A PE=1 SV=3	41	9	17	4	208	23.6	5.54	13.42	97.2	101	109.2	87.4	113.6	91.5
Q86TX2	Acyl-coenzyme A thioesterase 1 OS=Homo sapiens OX=9606 GN=ACOT1 PE=1 SV=1	30	10	14	10	421	46.2	7.34	22.87	101.7	93	105.9	70.8	146.2	82.4
P08865	40S ribosomal protein SA OS=Homo sapiens OX=9606 GN=RPSA PE=1 SV=4	25	6	16	6	295	32.8	4.87	35.87	92.5	92.7	108	94.1	119.2	93.4
Q9H2U2	Inorganic pyrophosphatase 2, mitochondrial OS=Homo sapiens OX=9606 GN=PPA2 PE=1 SV=2	29	9	15	9	334	37.9	7.39	20.96	69.8	98.5	137.5	101.1	126.7	66.4
P27694	Replication protein A 70 kDa DNA-binding subunit OS=Homo sapiens OX=9606 GN=RPA1 PE=1 SV=2	18	11	14	11	616	68.1	7.21	17.69	96.4	88.2	119.8	86.3	118.3	91
P61006	Ras-related protein Rab-8A OS=Homo sapiens OX=9606 GN=RAB8A PE=1 SV=1	45	10	18	5	207	23.7	9.07	34.57	107.6	98.5	90.9	99.9	106.8	96.3
Q8N2S1	Latent-transforming growth factor beta-binding protein 4 OS=Homo sapiens OX=9606 GN=LTBP4 PE=1 SV=2	12	16	16	15	1624	173.3	5.43	10.07	117.8	97.7	93	93.2	88.1	110.3
P61224	Ras-related protein Rap-1b OS=Homo sapiens OX=9606 GN=RAP1B PE=1 SV=1	32	6	18	3	184	20.8	5.78	30.81	107.8	110	86.1	110.2	89.1	96.8
P10606	Cytochrome c oxidase subunit 5B, mitochondrial OS=Homo sapiens OX=9606 GN=COX5B PE=1 SV=2	36	7	15	7	129	13.7	8.81	32.85	99.2	88.4	122.4	85.8	117.1	87.1
P62834	Ras-related protein Rap-1A OS=Homo sapiens OX=9606 GN=RAP1A PE=1 SV=1	32	5	16	2	184	21	6.67	27.93	111.6	102.5	102.2	97.7	92.8	93.2
Q14789	Golgin subfamily B member 1 OS=Homo sapiens OX=9606 GN=GOLGB1 PE=1 SV=2	6	16	16	15	3259	375.8	5	14.75	97.8	86.1	119.4	85.7	127.5	83.6
O00764	Pyridoxal kinase OS=Homo sapiens OX=9606 GN=PDXK PE=1 SV=1	28	7	10	7	312	35.1	6.13	17.99	100.1	101.1	100.6	97.1	104.4	96.7
P62280	40S ribosomal protein S11 OS=Homo sapiens OX=9606 GN=RPS11 PE=1 SV=3	39	7	16	7	158	18.4	10.3	23.64	92.4	79.9	122.2	86.3	147.6	71.7
Q9UHQ9	NADH-cytochrome b5 reductase 1 OS=Homo sapiens OX=9606 GN=CYB5R1 PE=1 SV=1	39	9	15	9	305	34.1	9.38	30.99	86.7	80.3	124.7	86.6	139.6	82.1
Q6YN16	Hydroxysteroid dehydrogenase-like protein 2 OS=Homo sapiens OX=9606 GN=HSDL2 PE=1 SV=1	24	10	15	10	418	45.4	7.99	23.22	91.7	75.4	170.3	69.2	125.7	67.8
Q12802	A-kinase anchor protein 13 OS=Homo sapiens OX=9606 GN=AKAP13 PE=1 SV=2	7	13	15	13	2813	307.4	5.24	14.62	97	99	113.8	83.6	125.4	81.2
P79483	HLA class II histocompatibility antigen, DR beta 3 chain OS=Homo sapiens OX=9606 GN=HLA-DRB3 PE=1 SV=1	38	8	13	4	266	29.9	8.56	29.92	106.7	82.7	126.7	82.4	114.4	87.1
P48506	Glutamate--cysteine ligase catalytic subunit OS=Homo sapiens OX=9606 GN=GCLC PE=1 SV=2	21	11	13	11	637	72.7	6.09	19.58	84.5	112.3	89.8	129.4	71.9	112.2
P46063	ATP-dependent DNA helicase Q1 OS=Homo sapiens OX=9606 GN=RECQL PE=1 SV=3	16	11	13	11	649	73.4	7.88	18.03	109.6	95.4	105.6	94.1	102.7	92.6
Q96HE7	ERO1-like protein alpha OS=Homo sapiens OX=9606 GN=ERO1A PE=1 SV=2	25	10	12	9	468	54.4	5.68	19.66	102.4	85.3	135.9	81.1	110.2	85.2
Q9Y2W1	Thyroid hormone receptor-associated protein 3 OS=Homo sapiens OX=9606 GN=THRAP3 PE=1 SV=2	18	14	17	13	955	108.6	10.15	25.15	96	81.9	148.7	81.1	111	81.3
Q14839	Chromodomain-helicase-DNA-binding protein 4 OS=Homo sapiens OX=9606 GN=CHD4 PE=1 SV=2	7	11	11	9	1912	217.9	5.86	15.99	95.1	89.4	121.4	84.7	118.8	90.7
Q01844	RNA-binding protein EWS OS=Homo sapiens OX=9606 GN=EWSR1 PE=1 SV=1	16	7	9	7	656	68.4	9.33	17.5	97.2	82.6	120.4	76.5	129.4	93.9
P62987	Ubiquitin-60S ribosomal protein L40 OS=Homo sapiens OX=9606 GN=UBA52 PE=1 SV=2	45	6	86	1	128	14.7	9.83	157.39	103	74.8	91.8	60.5	102.6	167.3
O95994	Anterior gradient protein 2 homolog OS=Homo sapiens OX=9606 GN=AGR2 PE=1 SV=1	49	7	14	6	175	20	9	19.44	104.6	77.2	97.6	69.9	179.1	71.6
P57737	Coronin-7 OS=Homo sapiens OX=9606 GN=CORO7 PE=1 SV=2	12	9	11	9	925	100.5	5.8	17.87	103.2	96.7	107.6	94.7	106.1	91.6
Q8WX93	Palladin OS=Homo sapiens OX=9606 GN=PALLD PE=1 SV=3	10	11	15	11	1383	150.5	7.09	16.42	110.7	105.1	95.4	99.7	90.9	98.2
O14980	Exportin-1 OS=Homo sapiens OX=9606 GN=XPO1 PE=1 SV=1	14	11	13	11	1071	123.3	6.06	19.34	95.2	90.9	120.8	90.6	109.8	92.7
Q96CN7	Isochorismatase domain-containing protein 1 OS=Homo sapiens OX=9606 GN=ISOC1 PE=1 SV=3	24	7	13	7	298	32.2	7.39	18.29	86.7	93.8	145.1	86.9	104.4	83.1
P20618	Proteasome subunit beta type-1 OS=Homo sapiens OX=9606 GN=PSMB1 PE=1 SV=2	30	6	14	6	241	26.5	8.13	26.51	97.3	91.7	115.5	97.3	101.1	97
Q16762	Thiosulfate sulfurtransferase OS=Homo sapiens OX=9606 GN=TST PE=1 SV=4	30	6	14	6	297	33.4	7.25	24.25	95.5	78.5	168	66	115.5	76.6
O75436	Vacuolar protein sorting-associated protein 26A OS=Homo sapiens OX=9606 GN=VPS26A PE=1 SV=2	34	9	12	9	327	38.1	6.57	20	103.5	110.6	95.9	106.4	92.2	91.6
Q9Y230	RuvB-like 2 OS=Homo sapiens OX=9606 GN=RUVBL2 PE=1 SV=3	23	10	16	10	463	51.1	5.64	20.4	96.4	98.2	104.6	95.3	114.4	91
Q9NUQ9	Protein FAM49B OS=Homo sapiens OX=9606 GN=FAM49B PE=1 SV=1	34	9	15	7	324	36.7	6.06	25.19	99.2	91.3	108.6	92.6	110.5	97.9
Q9P258	Protein RCC2 OS=Homo sapiens OX=9606 GN=RCC2 PE=1 SV=2	22	11	14	11	522	56	8.78	26.35	88.7	70.3	163	73.7	128.6	75.7
Q07866	Kinesin light chain 1 OS=Homo sapiens OX=9606 GN=KLC1 PE=1 SV=2	24	12	12	8	573	65.3	6.2	18.15	102.9	110.2	90.4	102	96.3	98.2
P21266	Glutathione S-transferase Mu 3 OS=Homo sapiens OX=9606 GN=GSTM3 PE=1 SV=3	43	10	18	8	225	26.5	5.54	27.28	88.3	97.2	110.1	86	134.7	83.8
O94874	E3 UFM1-protein ligase 1 OS=Homo sapiens OX=9606 GN=UFL1 PE=1 SV=2	18	14	17	14	794	89.5	6.79	19.17	106.5	88.6	114.6	97.7	99.2	93.3
P11310	Medium-chain specific acyl-CoA dehydrogenase, mitochondrial OS=Homo sapiens OX=9606 GN=ACADM PE=1 SV=1	22	9	18	9	421	46.6	8.37	26.66	84.1	65	209.1	59.9	115	67
P04066	Tissue alpha-L-fucosidase OS=Homo sapiens OX=9606 GN=FUCA1 PE=1 SV=4	24	10	16	10	466	53.7	6.84	20.42	73.6	65.3	197.8	62.6	133.5	67.3
Q5TDH0	Protein DDI1 homolog 2 OS=Homo sapiens OX=9606 GN=DDI2 PE=1 SV=1	41	11	14	11	399	44.5	5.05	17.81	88.7	118	86	121.5	77.8	108
Q9NRN5	Olfactomedin-like protein 3 OS=Homo sapiens OX=9606 GN=OLFML3 PE=2 SV=1	34	11	14	11	406	46	6.57	24.69	141.5	127.7	69.7	103.8	52.8	104.4
Q99439	Calponin-2 OS=Homo sapiens OX=9606 GN=CNN2 PE=1 SV=4	23	7	16	5	309	33.7	7.33	30.01	109.3	95.9	102	92.9	113.2	86.6
P12821	Angiotensin-converting enzyme OS=Homo sapiens OX=9606 GN=ACE PE=1 SV=1	11	12	17	12	1306	149.6	6.39	22.27	120	128.8	73.9	103.9	69.1	104.4
P40429	60S ribosomal protein L13a OS=Homo sapiens OX=9606 GN=RPL13A PE=1 SV=2	31	9	22	9	203	23.6	10.93	36.74	98.9	84.2	111.2	86.9	130.8	88.1
Q9Y4W6	AFG3-like protein 2 OS=Homo sapiens OX=9606 GN=AFG3L2 PE=1 SV=2	17	12	13	12	797	88.5	8.66	16.74	92.9	92.6	137.1	100.7	87.2	89.5
P05546	Heparin cofactor 2 OS=Homo sapiens OX=9606 GN=SERPIND1 PE=1 SV=3	16	8	15	8	499	57	6.9	24.77	86.9	113.8	74.6	118.8	76	130
P28066	Proteasome subunit alpha type-5 OS=Homo sapiens OX=9606 GN=PSMA5 PE=1 SV=3	44	7	14	7	241	26.4	4.79	20.67	96.5	93	121.7	93.8	103.3	91.7
O43175	D-3-phosphoglycerate dehydrogenase OS=Homo sapiens OX=9606 GN=PHGDH PE=1 SV=4	19	8	11	8	533	56.6	6.71	19.92	88.8	93.8	178.1	86.6	67.8	84.9
P62701	40S ribosomal protein S4, X isoform OS=Homo sapiens OX=9606 GN=RPS4X PE=1 SV=2	35	10	22	10	263	29.6	10.15	22.77	99.7	87.5	112.6	90.2	118.5	91.5
O15438	Canalicular multispecific organic anion transporter 2 OS=Homo sapiens OX=9606 GN=ABCC3 PE=1 SV=3	8	10	14	9	1527	169.2	7.2	18.73	80.6	83.4	121.7	81.3	147.5	85.5
P15924	Desmoplakin OS=Homo sapiens OX=9606 GN=DSP PE=1 SV=3	5	14	15	14	2871	331.6	6.81	8.72	72.9	81	149	87.9	145.9	63.4
P13611	Versican core protein OS=Homo sapiens OX=9606 GN=VCAN PE=1 SV=3	3	11	13	11	3396	372.6	4.51	14.75	93	80.5	98.5	79.3	162.6	86.2
P07203	Glutathione peroxidase 1 OS=Homo sapiens OX=9606 GN=GPX1 PE=1 SV=4	35	5	14	5	203	22.1	6.55	18.8	93.7	84.3	101.7	95.8	130.9	93.5
P24539	ATP synthase F(0) complex subunit B1, mitochondrial OS=Homo sapiens OX=9606 GN=ATP5PB PE=1 SV=2	25	8	23	8	256	28.9	9.36	33.62	100.5	90	118.2	89.9	110.4	91
O94804	Serine/threonine-protein kinase 10 OS=Homo sapiens OX=9606 GN=STK10 PE=1 SV=1	15	11	13	10	968	112.1	6.95	18.14	112.2	107.7	88.9	107.6	87.4	96.2
P51649	Succinate-semialdehyde dehydrogenase, mitochondrial OS=Homo sapiens OX=9606 GN=ALDH5A1 PE=1 SV=2	23	11	13	11	535	57.2	8.28	19.6	73.9	67.7	189.5	65.9	129.9	73.1
O00410	Importin-5 OS=Homo sapiens OX=9606 GN=IPO5 PE=1 SV=4	9	10	15	10	1097	123.6	4.94	19.65	97.4	95.7	113.5	94.8	104.3	94.2
Q13131	5'-AMP-activated protein kinase catalytic subunit alpha-1 OS=Homo sapiens OX=9606 GN=PRKAA1 PE=1 SV=4	17	8	12	8	559	64	8.12	15.12	107.8	96.4	104.3	91.2	114	86.2
P10644	cAMP-dependent protein kinase type I-alpha regulatory subunit OS=Homo sapiens OX=9606 GN=PRKAR1A PE=1 SV=1	27	10	13	9	381	43	5.35	18.26	99.4	98.1	100.3	102.1	103.6	96.4
B0I1T2	Unconventional myosin-Ig OS=Homo sapiens OX=9606 GN=MYO1G PE=1 SV=2	16	12	17	12	1018	116.4	8.73	18.43	102.5	110.4	85.5	102.4	98.9	100.3
P02743	Serum amyloid P-component OS=Homo sapiens OX=9606 GN=APCS PE=1 SV=2	23	6	26	6	223	25.4	6.54	47.76	109.2	106.6	75.2	132.6	60.3	115.9
A5A3E0	POTE ankyrin domain family member F OS=Homo sapiens OX=9606 GN=POTEF PE=1 SV=2	6	5	90	1	1075	121.4	6.2	152.91
Q14151	Scaffold attachment factor B2 OS=Homo sapiens OX=9606 GN=SAFB2 PE=1 SV=1	14	11	14	7	953	107.4	6.16	21.54	96.2	91.8	124.6	87.8	105	94.5
P25398	40S ribosomal protein S12 OS=Homo sapiens OX=9606 GN=RPS12 PE=1 SV=3	54	6	17	6	132	14.5	7.21	33.5	98.5	80.8	120.2	80.7	135.5	84.3
P12830	Cadherin-1 OS=Homo sapiens OX=9606 GN=CDH1 PE=1 SV=3	14	11	19	11	882	97.4	4.73	16.72	89.7	102.4	129.6	87.8	96.9	93.6
P05186	Alkaline phosphatase, tissue-nonspecific isozyme OS=Homo sapiens OX=9606 GN=ALPL PE=1 SV=4	21	9	11	9	524	57.3	6.67	17.12	74.7	71.6	150.5	64.9	167.3	71.1
P26599	Polypyrimidine tract-binding protein 1 OS=Homo sapiens OX=9606 GN=PTBP1 PE=1 SV=1	21	8	12	6	531	57.2	9.17	28.47	97.5	88.8	111.2	95.9	117.2	89.3
O00567	Nucleolar protein 56 OS=Homo sapiens OX=9606 GN=NOP56 PE=1 SV=4	16	8	15	8	594	66	9.19	22.79	97.8	100.4	105.6	91.8	108.9	95.5
P57721	Poly(rC)-binding protein 3 OS=Homo sapiens OX=9606 GN=PCBP3 PE=2 SV=2	20	6	15	1	371	39.4	8.07	32.64	106.6	80.2	88.2	102.1	132.5	90.3
Q13976	cGMP-dependent protein kinase 1 OS=Homo sapiens OX=9606 GN=PRKG1 PE=1 SV=3	18	11	13	11	671	76.3	6.04	13.52	119.1	117.9	72.5	109.9	78.3	102.4
Q96CW1	AP-2 complex subunit mu OS=Homo sapiens OX=9606 GN=AP2M1 PE=1 SV=2	22	10	16	10	435	49.6	9.54	21.52	97.6	102.9	93.3	107.6	98.1	100.5
Q13557	Calcium/calmodulin-dependent protein kinase type II subunit delta OS=Homo sapiens OX=9606 GN=CAMK2D PE=1 SV=3	17	9	13	7	499	56.3	7.25	24.93	84.4	83.6	142	81.9	130.3	77.8
Q13867	Bleomycin hydrolase OS=Homo sapiens OX=9606 GN=BLMH PE=1 SV=1	16	7	13	7	455	52.5	6.27	20.35	99.2	96.9	90.5	97.1	125.3	91.1
Q8N1G4	Leucine-rich repeat-containing protein 47 OS=Homo sapiens OX=9606 GN=LRRC47 PE=1 SV=1	18	10	16	10	583	63.4	8.28	19.05	96.5	93.1	136.5	82.7	98.4	92.8
P04632	Calpain small subunit 1 OS=Homo sapiens OX=9606 GN=CAPNS1 PE=1 SV=1	26	5	21	5	268	28.3	5.2	43.19	108.7	110.9	92.2	97.1	103.2	87.9
P50148	Guanine nucleotide-binding protein G(q) subunit alpha OS=Homo sapiens OX=9606 GN=GNAQ PE=1 SV=4	32	10	17	6	359	42.1	5.68	22.7	104.6	110.4	76.1	110.3	100.6	98.1
P25325	3-mercaptopyruvate sulfurtransferase OS=Homo sapiens OX=9606 GN=MPST PE=1 SV=3	41	10	19	10	297	33.2	6.6	32.38	91.6	95.1	129	89.6	108.5	86.2
Q9Y2Q3	Glutathione S-transferase kappa 1 OS=Homo sapiens OX=9606 GN=GSTK1 PE=1 SV=3	38	7	11	7	226	25.5	8.41	16.39	85.8	97.6	130.4	103.1	91.1	92
Q9BTV4	Transmembrane protein 43 OS=Homo sapiens OX=9606 GN=TMEM43 PE=1 SV=1	24	10	13	10	400	44.8	8.13	25.85	104.8	94.3	100	86.6	116.3	98
P30419	Glycylpeptide N-tetradecanoyltransferase 1 OS=Homo sapiens OX=9606 GN=NMT1 PE=1 SV=2	20	9	10	9	496	56.8	7.8	12.57	98.9	89.7	126.8	92.5	108.6	83.5
Q9Y2A7	Nck-associated protein 1 OS=Homo sapiens OX=9606 GN=NCKAP1 PE=1 SV=1	9	12	15	12	1128	128.7	6.62	15.51	111.6	104.8	111.3	90.9	91.4	90
P28161	Glutathione S-transferase Mu 2 OS=Homo sapiens OX=9606 GN=GSTM2 PE=1 SV=2	44	8	15	4	218	25.7	6.37	31.72	84.4	108	111	102.4	88.4	105.9
P10643	Complement component C7 OS=Homo sapiens OX=9606 GN=C7 PE=1 SV=2	21	12	14	12	843	93.5	6.48	17.4	87.6	96.8	86.3	122.5	89.1	117.8
Q9BZZ5	Apoptosis inhibitor 5 OS=Homo sapiens OX=9606 GN=API5 PE=1 SV=3	18	9	18	9	524	59	7.34	23.17	97.3	95.5	122	90.5	105	89.7
O60271	C-Jun-amino-terminal kinase-interacting protein 4 OS=Homo sapiens OX=9606 GN=SPAG9 PE=1 SV=4	12	12	15	12	1321	146.1	5.15	17.19	100.9	93.5	129.7	89.6	103	83.1
P42566	Epidermal growth factor receptor substrate 15 OS=Homo sapiens OX=9606 GN=EPS15 PE=1 SV=2	15	11	14	11	896	98.6	4.64	16.43	97.2	108.4	93	108.5	89.3	103.5
P62277	40S ribosomal protein S13 OS=Homo sapiens OX=9606 GN=RPS13 PE=1 SV=2	56	10	17	10	151	17.2	10.54	35.95	97.4	88	113.8	90.6	123.2	87
Q15124	Phosphoglucomutase-like protein 5 OS=Homo sapiens OX=9606 GN=PGM5 PE=1 SV=2	20	10	14	10	567	62.2	7.21	25.01	115.6	118.5	90.8	101.9	78.8	94.4
Q99584	Protein S100-A13 OS=Homo sapiens OX=9606 GN=S100A13 PE=1 SV=1	49	6	18	6	98	11.5	6.16	31.78	80.6	71	163.8	80.9	118.3	85.4
P06865	Beta-hexosaminidase subunit alpha OS=Homo sapiens OX=9606 GN=HEXA PE=1 SV=2	19	11	14	10	529	60.7	5.16	30.36	89.7	72.1	160.7	79.1	115.9	82.5
O43813	Glutathione S-transferase LANCL1 OS=Homo sapiens OX=9606 GN=LANCL1 PE=1 SV=1	24	7	16	7	399	45.3	7.75	16.45	104.5	98.1	101.3	104.3	99	92.9
P63096	Guanine nucleotide-binding protein G(i) subunit alpha-1 OS=Homo sapiens OX=9606 GN=GNAI1 PE=1 SV=2	25	8	17	3	354	40.3	5.97	26.89	94.1	176.2	73.7	81.7	80.2	94.1
Q96F07	Cytoplasmic FMR1-interacting protein 2 OS=Homo sapiens OX=9606 GN=CYFIP2 PE=1 SV=2	10	12	18	2	1278	148.3	7.31	20.76
Q9Y613	FH1/FH2 domain-containing protein 1 OS=Homo sapiens OX=9606 GN=FHOD1 PE=1 SV=3	12	14	16	14	1164	126.5	6.39	18.83	102.4	107	105.5	100.8	100.6	83.8
Q01813	ATP-dependent 6-phosphofructokinase, platelet type OS=Homo sapiens OX=9606 GN=PFKP PE=1 SV=2	19	12	14	7	784	85.5	7.55	16.53	124.7	101.2	98.8	97.1	77.5	100.6
Q9UKY7	Protein CDV3 homolog OS=Homo sapiens OX=9606 GN=CDV3 PE=1 SV=1	69	8	11	8	258	27.3	6.4	9.1	104.3	97.4	111.6	97.2	102	87.6
Q9NXG2	THUMP domain-containing protein 1 OS=Homo sapiens OX=9606 GN=THUMPD1 PE=1 SV=2	28	10	12	10	353	39.3	7.88	17.74	95.5	91.8	118.2	87.3	118.1	89.1
P98095	Fibulin-2 OS=Homo sapiens OX=9606 GN=FBLN2 PE=1 SV=2	10	9	11	9	1184	126.5	4.82	16.9	104.3	101.5	70.7	92.4	100.7	130.5
P25685	DnaJ homolog subfamily B member 1 OS=Homo sapiens OX=9606 GN=DNAJB1 PE=1 SV=4	31	11	16	10	340	38	8.63	24.94	100.3	95.3	100	92	118.6	93.7
O15143	Actin-related protein 2/3 complex subunit 1B OS=Homo sapiens OX=9606 GN=ARPC1B PE=1 SV=3	31	8	17	7	372	40.9	8.35	25.84	99	93.9	96	100	112.1	99
Q02539	Histone H1.1 OS=Homo sapiens OX=9606 GN=H1-1 PE=1 SV=3	20	6	70	1	215	21.8	10.99	100.4
Q5S007	Leucine-rich repeat serine/threonine-protein kinase 2 OS=Homo sapiens OX=9606 GN=LRRK2 PE=1 SV=2	6	12	15	12	2527	285.9	6.8	11.26	75.5	100.2	61.2	92.5	181.5	89.2
P04179	Superoxide dismutase [Mn], mitochondrial OS=Homo sapiens OX=9606 GN=SOD2 PE=1 SV=3	30	7	19	7	222	24.7	8.25	43.07	100.1	87.2	98.7	127.3	92.5	94.2
Q8IZ83	Aldehyde dehydrogenase family 16 member A1 OS=Homo sapiens OX=9606 GN=ALDH16A1 PE=1 SV=2	15	10	11	10	802	85.1	6.79	19.77	98.4	98.6	95.5	95.8	107	104.7
Q92900	Regulator of nonsense transcripts 1 OS=Homo sapiens OX=9606 GN=UPF1 PE=1 SV=2	11	11	14	11	1129	124.3	6.61	21.55	100.4	101.9	99.3	98	106	94.3
P06681	Complement C2 OS=Homo sapiens OX=9606 GN=C2 PE=1 SV=2	14	10	14	10	752	83.2	7.42	24.77	94.4	109.3	77	115	83.1	121.2
P36957	Dihydrolipoyllysine-residue succinyltransferase component of 2-oxoglutarate dehydrogenase complex, mitochondrial OS=Homo sapiens OX=9606 GN=DLST PE=1 SV=4	22	10	22	10	453	48.7	8.95	33.77	100.7	89.9	132.1	84.8	107.2	85.4
Q92688	Acidic leucine-rich nuclear phosphoprotein 32 family member B OS=Homo sapiens OX=9606 GN=ANP32B PE=1 SV=1	22	8	12	5	251	28.8	4.06	18.37	96.2	82.9	125.7	80.9	133.3	81
Q92597	Protein NDRG1 OS=Homo sapiens OX=9606 GN=NDRG1 PE=1 SV=1	22	5	9	5	394	42.8	5.82	13.36	117.3	101.9	94.4	96.3	109.8	80.4
Q15029	116 kDa U5 small nuclear ribonucleoprotein component OS=Homo sapiens OX=9606 GN=EFTUD2 PE=1 SV=1	15	12	16	11	972	109.4	5	20.95	95.8	94.3	115.6	87.1	111.6	95.5
P62829	60S ribosomal protein L23 OS=Homo sapiens OX=9606 GN=RPL23 PE=1 SV=1	49	6	15	6	140	14.9	10.51	29.93	98.4	83.9	115.6	80.3	132.1	89.6
Q9Y224	RNA transcription, translation and transport factor protein OS=Homo sapiens OX=9606 GN=RTRAF PE=1 SV=1	33	8	14	8	244	28.1	6.65	27.51	98.5	101.1	101.2	90.9	110.5	97.8
P00505	Aspartate aminotransferase, mitochondrial OS=Homo sapiens OX=9606 GN=GOT2 PE=1 SV=3	22	10	13	10	430	47.5	9.01	24.56	104.1	84.6	149.4	80.7	93.1	88.1
Q9NTX5	Ethylmalonyl-CoA decarboxylase OS=Homo sapiens OX=9606 GN=ECHDC1 PE=1 SV=2	26	6	10	6	307	33.7	8.21	24.69	101.1	104.2	98.3	104.1	94.6	97.7
Q14008	Cytoskeleton-associated protein 5 OS=Homo sapiens OX=9606 GN=CKAP5 PE=1 SV=3	7	13	15	13	2032	225.4	7.8	9.06	98.6	101.8	107.6	92.6	103.1	96.3
Q9H3U1	Protein unc-45 homolog A OS=Homo sapiens OX=9606 GN=UNC45A PE=1 SV=1	15	12	12	12	944	103	6.07	14.31	103.5	95.9	105	94.7	106.6	94.3
P48047	ATP synthase subunit O, mitochondrial OS=Homo sapiens OX=9606 GN=ATP5PO PE=1 SV=1	36	8	12	8	213	23.3	9.96	23.17	99.4	90.2	124.2	88	113.7	84.5
Q8NBJ5	Procollagen galactosyltransferase 1 OS=Homo sapiens OX=9606 GN=COLGALT1 PE=1 SV=1	19	12	14	12	622	71.6	7.31	16.36	99.1	86.1	107.9	92	121.2	93.8
P08559	Pyruvate dehydrogenase E1 component subunit alpha, somatic form, mitochondrial OS=Homo sapiens OX=9606 GN=PDHA1 PE=1 SV=3	24	11	16	11	390	43.3	8.06	27.81	103.3	87.3	135.9	83.7	105.6	84.3
P33241	Lymphocyte-specific protein 1 OS=Homo sapiens OX=9606 GN=LSP1 PE=1 SV=1	32	9	14	9	339	37.2	4.74	26.46	107.5	89.6	120.4	103.1	87.6	91.8
Q9HDC9	Adipocyte plasma membrane-associated protein OS=Homo sapiens OX=9606 GN=APMAP PE=1 SV=2	21	9	17	9	416	46.5	6.16	30.46	104.7	105.9	102.5	100.7	86.2	100
P50453	Serpin B9 OS=Homo sapiens OX=9606 GN=SERPINB9 PE=1 SV=1	34	11	15	11	376	42.4	5.86	19.27	133.2	120.8	86.9	96.6	75.9	86.7
Q9UHB9	Signal recognition particle subunit SRP68 OS=Homo sapiens OX=9606 GN=SRP68 PE=1 SV=2	18	10	11	10	627	70.7	8.56	21.58	99.7	89.7	125.6	89.3	107.2	88.5
O14639	Actin-binding LIM protein 1 OS=Homo sapiens OX=9606 GN=ABLIM1 PE=1 SV=3	18	13	13	12	778	87.6	8.59	16.7	125.7	107.7	84.8	102.9	86.7	92.2
Q15435	Protein phosphatase 1 regulatory subunit 7 OS=Homo sapiens OX=9606 GN=PPP1R7 PE=1 SV=1	23	8	10	8	360	41.5	4.91	18.07	101.5	103.2	112	98.2	91.8	93.3
P62263	40S ribosomal protein S14 OS=Homo sapiens OX=9606 GN=RPS14 PE=1 SV=3	36	5	12	5	151	16.3	10.05	30.04	96.2	89.2	115.1	87.5	122.5	89.5
Q16643	Drebrin OS=Homo sapiens OX=9606 GN=DBN1 PE=1 SV=4	18	9	15	9	649	71.4	4.45	10.85	102.4	97.3	110	96.7	95.3	98.3
Q14894	Ketimine reductase mu-crystallin OS=Homo sapiens OX=9606 GN=CRYM PE=1 SV=1	34	9	12	9	314	33.8	5.14	14.14	77	68.1	132.1	65.3	170.3	87.2
P39687	Acidic leucine-rich nuclear phosphoprotein 32 family member A OS=Homo sapiens OX=9606 GN=ANP32A PE=1 SV=1	27	8	14	5	249	28.6	4.09	23.15	128.8	77.6	123.3	78.6	113.3	78.3
P15088	Mast cell carboxypeptidase A OS=Homo sapiens OX=9606 GN=CPA3 PE=1 SV=2	24	11	28	11	417	48.6	9	41.27	60.4	59.1	69.8	74.7	244.8	91.2
Q12905	Interleukin enhancer-binding factor 2 OS=Homo sapiens OX=9606 GN=ILF2 PE=1 SV=2	17	7	13	7	390	43	5.26	15.71	98.7	81.1	125.7	79.5	135	80
P61313	60S ribosomal protein L15 OS=Homo sapiens OX=9606 GN=RPL15 PE=1 SV=2	33	7	16	7	204	24.1	11.62	25.95	93.9	92.5	113.1	82.1	128	90.5
P19652	Alpha-1-acid glycoprotein 2 OS=Homo sapiens OX=9606 GN=ORM2 PE=1 SV=2	31	6	16	4	201	23.6	5.11	31.98	88.1	104.7	68.8	124.5	75.9	138
P62328	Thymosin beta-4 OS=Homo sapiens OX=9606 GN=TMSB4X PE=1 SV=2	80	8	46	5	44	5.1	5.06	65.65	115.4	90.3	132.2	83.4	96.2	82.5
Q92930	Ras-related protein Rab-8B OS=Homo sapiens OX=9606 GN=RAB8B PE=1 SV=2	39	8	20	3	207	23.6	9.07	37.22	115.5	113.3	80.3	106.6	88.5	95.8
O43865	S-adenosylhomocysteine hydrolase-like protein 1 OS=Homo sapiens OX=9606 GN=AHCYL1 PE=1 SV=2	25	14	21	3	530	58.9	6.89	19.67	94.6	98.5	121.1	93.5	95	97.2
Q9NZB2	Constitutive coactivator of PPAR-gamma-like protein 1 OS=Homo sapiens OX=9606 GN=FAM120A PE=1 SV=2	9	9	11	7	1118	121.8	8.88	17.71	96.7	87.6	111.4	89.8	121.5	93
Q9Y305	Acyl-coenzyme A thioesterase 9, mitochondrial OS=Homo sapiens OX=9606 GN=ACOT9 PE=1 SV=2	24	10	15	10	439	49.9	8.6	24.85	99.5	91.9	134.9	90.2	93.7	89.8
P35237	Serpin B6 OS=Homo sapiens OX=9606 GN=SERPINB6 PE=1 SV=3	27	9	16	8	376	42.6	5.27	22.32	118	115.8	84.4	113.4	68.9	99.5
P07858	Cathepsin B OS=Homo sapiens OX=9606 GN=CTSB PE=1 SV=3	21	6	14	6	339	37.8	6.3	34.09	92.2	67.5	110.5	76.2	176	77.7
P41091	Eukaryotic translation initiation factor 2 subunit 3 OS=Homo sapiens OX=9606 GN=EIF2S3 PE=1 SV=3	20	8	16	8	472	51.1	8.4	20.16	100.1	96	108	95.7	112.9	87.3
P09104	Gamma-enolase OS=Homo sapiens OX=9606 GN=ENO2 PE=1 SV=3	20	7	33	5	434	47.2	5.03	46.79	96.4	102.3	81.3	102.2	120.3	97.6
P49915	GMP synthase [glutamine-hydrolyzing] OS=Homo sapiens OX=9606 GN=GMPS PE=1 SV=1	21	13	14	13	693	76.7	6.87	12.67	86.8	95.6	107.2	95.2	114.9	100.4
P47897	Glutamine--tRNA ligase OS=Homo sapiens OX=9606 GN=QARS PE=1 SV=1	17	11	13	11	775	87.7	7.15	19.59	96.6	89.7	118.9	90.8	115.8	88.1
O14974	Protein phosphatase 1 regulatory subunit 12A OS=Homo sapiens OX=9606 GN=PPP1R12A PE=1 SV=1	12	12	13	12	1030	115.2	5.4	18.39	110.8	107.3	88.4	101.5	88.8	103.2
P17612	cAMP-dependent protein kinase catalytic subunit alpha OS=Homo sapiens OX=9606 GN=PRKACA PE=1 SV=2	31	10	13	2	351	40.6	8.79	23.78	97.9	123.6	98.4	94.6	99.2	86.3
P15170	Eukaryotic peptide chain release factor GTP-binding subunit ERF3A OS=Homo sapiens OX=9606 GN=GSPT1 PE=1 SV=1	18	9	13	3	499	55.7	5.62	20.61	98.7	86.9	121.1	85.5	122.3	85.5
Q9BXN1	Asporin OS=Homo sapiens OX=9606 GN=ASPN PE=1 SV=2	27	9	11	9	380	43.4	7.08	19.28	101.8	107.8	72	93.8	85.6	139
P62826	GTP-binding nuclear protein Ran OS=Homo sapiens OX=9606 GN=RAN PE=1 SV=3	36	7	16	7	216	24.4	7.49	30.24	90.9	97.1	112.7	95.9	107.5	95.9
P01893	Putative HLA class I histocompatibility antigen, alpha chain H OS=Homo sapiens OX=9606 GN=HLA-H PE=5 SV=3	22	5	18	1	362	40.9	6.3	24.26
P61019	Ras-related protein Rab-2A OS=Homo sapiens OX=9606 GN=RAB2A PE=1 SV=1	42	8	14	3	212	23.5	6.54	29	95.1	101.4	90.8	104	101	107.7
Q8N335	Glycerol-3-phosphate dehydrogenase 1-like protein OS=Homo sapiens OX=9606 GN=GPD1L PE=1 SV=1	29	10	14	9	351	38.4	7.02	21.74	100.9	100.5	120.1	96.9	96.4	85.1
O75947	ATP synthase subunit d, mitochondrial OS=Homo sapiens OX=9606 GN=ATP5PD PE=1 SV=3	54	9	16	9	161	18.5	5.3	22.62	97.1	88.1	124.8	85.7	120.7	83.5
P22694	cAMP-dependent protein kinase catalytic subunit beta OS=Homo sapiens OX=9606 GN=PRKACB PE=1 SV=2	31	10	13	2	351	40.6	8.78	22.03	82.7	101	116.7	85.3	109.9	104.5
P26368	Splicing factor U2AF 65 kDa subunit OS=Homo sapiens OX=9606 GN=U2AF2 PE=1 SV=4	20	6	12	6	475	53.5	9.09	22.48	94.6	83.8	121.7	81.9	139	79
Q96HC4	PDZ and LIM domain protein 5 OS=Homo sapiens OX=9606 GN=PDLIM5 PE=1 SV=5	17	8	15	8	596	63.9	8.21	26.68	113.8	95.4	92.9	94.4	106.1	97.4
P55036	26S proteasome non-ATPase regulatory subunit 4 OS=Homo sapiens OX=9606 GN=PSMD4 PE=1 SV=1	27	7	9	7	377	40.7	4.79	15.92	86.7	91.5	108.8	87.2	134.3	91.4
Q15393	Splicing factor 3B subunit 3 OS=Homo sapiens OX=9606 GN=SF3B3 PE=1 SV=4	11	12	15	12	1217	135.5	5.26	23.56	94.1	94.2	119.6	92.8	108	91.3
Q14194	Dihydropyrimidinase-related protein 1 OS=Homo sapiens OX=9606 GN=CRMP1 PE=1 SV=1	7	3	13	1	572	62.1	7.03	30.52	107.7	110	96	99.8	94.8	91.8
P05204	Non-histone chromosomal protein HMG-17 OS=Homo sapiens OX=9606 GN=HMGN2 PE=1 SV=3	56	5	19	5	90	9.4	9.99	20.57	109.2	82.6	160.7	72.8	96.5	78.1
P12081	Histidine--tRNA ligase, cytoplasmic OS=Homo sapiens OX=9606 GN=HARS PE=1 SV=2	18	10	15	6	509	57.4	5.88	21.7	87.6	86.1	124.2	93.4	116.9	91.8
Q9UH65	Switch-associated protein 70 OS=Homo sapiens OX=9606 GN=SWAP70 PE=1 SV=1	22	12	12	12	585	69	5.87	16.75	100.4	86.9	103.1	92.5	129.1	88
Q00688	Peptidyl-prolyl cis-trans isomerase FKBP3 OS=Homo sapiens OX=9606 GN=FKBP3 PE=1 SV=1	45	9	17	9	224	25.2	9.28	18.91	82.2	73.5	161	71.4	134.9	76.9
Q04760	Lactoylglutathione lyase OS=Homo sapiens OX=9606 GN=GLO1 PE=1 SV=4	32	6	14	6	184	20.8	5.31	25.47	92.9	91	132	88.1	114	82
P18621	60S ribosomal protein L17 OS=Homo sapiens OX=9606 GN=RPL17 PE=1 SV=3	36	7	17	6	184	21.4	10.17	21.56	98	82.3	115.6	82.9	131.1	90.1
P05452	Tetranectin OS=Homo sapiens OX=9606 GN=CLEC3B PE=1 SV=3	30	5	10	5	202	22.5	5.67	14.64	120.5	136.9	74.7	108	68.2	91.7
Q03001	Dystonin OS=Homo sapiens OX=9606 GN=DST PE=1 SV=4	3	17	17	13	7570	860.1	5.25	7.85	108.3	116.9	86.1	111.1	75.9	101.7
P22087	rRNA 2'-O-methyltransferase fibrillarin OS=Homo sapiens OX=9606 GN=FBL PE=1 SV=2	29	9	17	9	321	33.8	10.18	21.74	104.5	83.2	118.6	85.4	123.3	85
Q5JTV8	Torsin-1A-interacting protein 1 OS=Homo sapiens OX=9606 GN=TOR1AIP1 PE=1 SV=2	15	7	10	6	583	66.2	8.18	21.78	98.3	81.1	97.3	78	160.8	84.5
Q9Y2S2	Lambda-crystallin homolog OS=Homo sapiens OX=9606 GN=CRYL1 PE=1 SV=3	33	8	11	8	319	35.4	6.18	18.32	91.3	97.4	89.9	112.9	96.7	111.8
P08236	Beta-glucuronidase OS=Homo sapiens OX=9606 GN=GUSB PE=1 SV=2	10	7	17	7	651	74.7	7.02	31.86	76.6	69.3	184.4	64.6	135.6	69.5
P11233	Ras-related protein Ral-A OS=Homo sapiens OX=9606 GN=RALA PE=1 SV=1	28	6	14	5	206	23.6	7.11	25	122.2	123.6	67.5	121.5	70.2	95.1
P68036	Ubiquitin-conjugating enzyme E2 L3 OS=Homo sapiens OX=9606 GN=UBE2L3 PE=1 SV=1	39	6	12	6	154	17.9	8.51	24.05	99.9	95.1	111.5	91.7	110.5	91.3
Q9Y2J2	Band 4.1-like protein 3 OS=Homo sapiens OX=9606 GN=EPB41L3 PE=1 SV=2	10	9	13	5	1087	120.6	5.19	13.48	110	101.5	83.1	102.2	115.2	88
P41252	Isoleucine--tRNA ligase, cytoplasmic OS=Homo sapiens OX=9606 GN=IARS PE=1 SV=2	10	11	11	11	1262	144.4	6.15	18.75	94.3	84.7	117.7	86.6	127.3	89.4
P62249	40S ribosomal protein S16 OS=Homo sapiens OX=9606 GN=RPS16 PE=1 SV=2	38	7	15	7	146	16.4	10.21	31.78	97.3	88.2	111.4	88.7	122	92.4
O43488	Aflatoxin B1 aldehyde reductase member 2 OS=Homo sapiens OX=9606 GN=AKR7A2 PE=1 SV=3	20	6	10	6	359	39.6	7.17	17.23	99.5	94.3	133.3	88.7	98.3	86
P30038	Delta-1-pyrroline-5-carboxylate dehydrogenase, mitochondrial OS=Homo sapiens OX=9606 GN=ALDH4A1 PE=1 SV=3	20	10	13	10	563	61.7	8.07	16.31	89.3	80.4	145	85.7	114.1	85.5
Q02543	60S ribosomal protein L18a OS=Homo sapiens OX=9606 GN=RPL18A PE=1 SV=2	35	6	14	6	176	20.7	10.71	29.01	97	77.8	119.4	84.8	133.5	87.5
P61011	Signal recognition particle 54 kDa protein OS=Homo sapiens OX=9606 GN=SRP54 PE=1 SV=1	20	11	13	11	504	55.7	8.75	11.12	103.2	92.5	123.3	89.1	105.2	86.6
P22234	Multifunctional protein ADE2 OS=Homo sapiens OX=9606 GN=PAICS PE=1 SV=3	23	9	14	9	425	47	7.23	12.02	79.2	86	138.6	96.3	101.3	98.6
Q8N392	Rho GTPase-activating protein 18 OS=Homo sapiens OX=9606 GN=ARHGAP18 PE=1 SV=3	15	8	11	8	663	74.9	6.44	14.41	102.3	126.7	84.7	113.6	73.2	99.6
Q15599	Na(+)/H(+) exchange regulatory cofactor NHE-RF2 OS=Homo sapiens OX=9606 GN=SLC9A3R2 PE=1 SV=2	24	8	21	8	337	37.4	7.93	33.86	123.1	112.5	80.6	103.4	85.1	95.3
Q15691	Microtubule-associated protein RP/EB family member 1 OS=Homo sapiens OX=9606 GN=MAPRE1 PE=1 SV=3	31	8	13	6	268	30	5.14	20.3	108.7	94.3	105.3	92.4	106.6	92.8
Q8NF91	Nesprin-1 OS=Homo sapiens OX=9606 GN=SYNE1 PE=1 SV=4	2	14	14	14	8797	1010.5	5.53	6.07	111.4	114.4	93.4	99	75.4	106.3
P18754	Regulator of chromosome condensation OS=Homo sapiens OX=9606 GN=RCC1 PE=1 SV=1	21	7	9	7	421	44.9	7.52	20.51	68	65.6	177.7	67.4	130.4	90.9
Q9NYF8	Bcl-2-associated transcription factor 1 OS=Homo sapiens OX=9606 GN=BCLAF1 PE=1 SV=2	11	9	12	8	920	106.1	9.98	13.84	93.7	78.1	173.3	76.2	105.2	73.5
P00966	Argininosuccinate synthase OS=Homo sapiens OX=9606 GN=ASS1 PE=1 SV=2	21	10	16	10	412	46.5	8.02	24.54	81	83.2	83.6	72	208.4	71.8
P41240	Tyrosine-protein kinase CSK OS=Homo sapiens OX=9606 GN=CSK PE=1 SV=1	23	10	13	10	450	50.7	7.06	17.78	100.7	97.1	97.8	102.6	102.8	99
O95466	Formin-like protein 1 OS=Homo sapiens OX=9606 GN=FMNL1 PE=1 SV=3	12	12	13	12	1100	121.8	5.72	15.29	113.4	94.5	98.8	98.3	106	88.9
P61221	ATP-binding cassette sub-family E member 1 OS=Homo sapiens OX=9606 GN=ABCE1 PE=1 SV=1	13	7	11	7	599	67.3	8.34	21.34	94.6	82.2	124.5	82.9	124.3	91.4
P50402	Emerin OS=Homo sapiens OX=9606 GN=EMD PE=1 SV=1	43	8	14	8	254	29	5.5	17.26	91.1	88.8	137.3	83.6	112.5	86.6
O75323	Protein NipSnap homolog 2 OS=Homo sapiens OX=9606 GN=NIPSNAP2 PE=1 SV=1	23	7	17	5	286	33.7	9.36	25.84	88.3	80.1	174.8	76.5	107.6	72.7
O60832	H/ACA ribonucleoprotein complex subunit DKC1 OS=Homo sapiens OX=9606 GN=DKC1 PE=1 SV=3	20	10	11	10	514	57.6	9.42	17.7	87.1	75.6	155.9	77.9	109.2	94.2
Q8WVM8	Sec1 family domain-containing protein 1 OS=Homo sapiens OX=9606 GN=SCFD1 PE=1 SV=4	18	8	11	8	642	72.3	6.27	15.76	97.6	84.4	114.3	96.6	110	97.1
Q92556	Engulfment and cell motility protein 1 OS=Homo sapiens OX=9606 GN=ELMO1 PE=1 SV=2	18	11	12	9	727	83.8	6.28	13.59	107.3	98.8	89.5	103.7	96.6	104.2
Q12955	Ankyrin-3 OS=Homo sapiens OX=9606 GN=ANK3 PE=1 SV=3	3	11	13	9	4377	480.1	6.49	11.12	106	102.4	100.3	81.8	123.4	86.2
P21281	V-type proton ATPase subunit B, brain isoform OS=Homo sapiens OX=9606 GN=ATP6V1B2 PE=1 SV=3	20	9	11	9	511	56.5	5.81	13.11	110.4	92.4	94.4	105.4	102	95.3
Q13618	Cullin-3 OS=Homo sapiens OX=9606 GN=CUL3 PE=1 SV=2	16	12	13	12	768	88.9	8.48	14.24	95.5	103.8	111	90	110.1	89.6
Q14677	Clathrin interactor 1 OS=Homo sapiens OX=9606 GN=CLINT1 PE=1 SV=1	18	10	13	10	625	68.2	6.42	6.31	97.4	90.1	112.4	97.2	106.5	96.4
O15511	Actin-related protein 2/3 complex subunit 5 OS=Homo sapiens OX=9606 GN=ARPC5 PE=1 SV=3	63	8	14	7	151	16.3	5.67	17.58	105.7	96.7	97.1	103.2	99.9	97.3
Q13740	CD166 antigen OS=Homo sapiens OX=9606 GN=ALCAM PE=1 SV=2	18	11	13	11	583	65.1	6.25	14.33	108.6	110	131.4	89.1	76.7	84.2
Q8IYD1	Eukaryotic peptide chain release factor GTP-binding subunit ERF3B OS=Homo sapiens OX=9606 GN=GSPT2 PE=1 SV=2	13	8	12	2	628	68.8	5.43	21.1	100.6	103.2	98.6	93.4	111.1	93.1
Q14699	Raftlin OS=Homo sapiens OX=9606 GN=RFTN1 PE=1 SV=4	25	9	11	9	578	63.1	5.67	11.13	112.5	95.9	92.2	92.1	104.5	102.8
P16452	Erythrocyte membrane protein band 4.2 OS=Homo sapiens OX=9606 GN=EPB42 PE=1 SV=3	15	10	12	10	691	77	8.09	18.45	79.9	125.9	69.4	136.9	66.6	121.2
P10515	Dihydrolipoyllysine-residue acetyltransferase component of pyruvate dehydrogenase complex, mitochondrial OS=Homo sapiens OX=9606 GN=DLAT PE=1 SV=3	12	8	15	8	647	69	7.84	21.92	99.3	98.7	108.3	98.9	95	99.7
Q15907	Ras-related protein Rab-11B OS=Homo sapiens OX=9606 GN=RAB11B PE=1 SV=4	35	8	13	8	218	24.5	5.94	24.3	107.6	87.6	105.6	92.5	119.6	87.1
Q13098	COP9 signalosome complex subunit 1 OS=Homo sapiens OX=9606 GN=GPS1 PE=1 SV=4	19	8	12	8	491	55.5	6.74	20.59	100.1	97	105.8	90.4	107.4	99.4
Q9UJ70	N-acetyl-D-glucosamine kinase OS=Homo sapiens OX=9606 GN=NAGK PE=1 SV=4	31	8	10	8	344	37.4	6.24	18.51	92.8	85.8	114.5	112.9	101.2	92.8
Q14643	Inositol 1,4,5-trisphosphate receptor type 1 OS=Homo sapiens OX=9606 GN=ITPR1 PE=1 SV=3	4	11	13	6	2758	313.7	6.04	16.59	107.8	96.1	98.7	100.2	105.1	92
Q96PK6	RNA-binding protein 14 OS=Homo sapiens OX=9606 GN=RBM14 PE=1 SV=2	16	9	12	9	669	69.4	9.67	10.74	102.1	77.3	134.6	85.5	116.8	83.8
Q9BUQ8	Probable ATP-dependent RNA helicase DDX23 OS=Homo sapiens OX=9606 GN=DDX23 PE=1 SV=3	15	10	12	10	820	95.5	9.55	13.34	92.9	92.7	123.2	84.6	120.2	86.5
P16930	Fumarylacetoacetase OS=Homo sapiens OX=9606 GN=FAH PE=1 SV=2	22	8	12	8	419	46.3	6.95	16.96	84.8	98.3	105.7	96.7	125.7	88.9
Q8NF37	Lysophosphatidylcholine acyltransferase 1 OS=Homo sapiens OX=9606 GN=LPCAT1 PE=1 SV=2	19	9	13	9	534	59.1	6.02	22.15	87	82.9	118.7	76	153.9	81.5
Q6P1M3	LLGL scribble cell polarity complex component 2 OS=Homo sapiens OX=9606 GN=LLGL2 PE=1 SV=2	12	11	12	11	1020	113.4	7.52	13.03	115.6	117	94.9	99.2	86.7	86.7
A0AVT1	Ubiquitin-like modifier-activating enzyme 6 OS=Homo sapiens OX=9606 GN=UBA6 PE=1 SV=1	9	9	11	9	1052	117.9	6.14	12.3	107.4	90	115.9	85.1	113.6	88
Q5U651	Ras-interacting protein 1 OS=Homo sapiens OX=9606 GN=RASIP1 PE=1 SV=1	15	9	10	9	963	103.4	7.96	13.19	104.1	114	76.1	119.7	82.1	104
P61626	Lysozyme C OS=Homo sapiens OX=9606 GN=LYZ PE=1 SV=1	49	6	17	6	148	16.5	9.16	24.63	130.7	122.8	76.6	89.5	94.5	85.9
Q9BZF9	Uveal autoantigen with coiled-coil domains and ankyrin repeats OS=Homo sapiens OX=9606 GN=UACA PE=1 SV=2	10	14	14	14	1416	162.4	7.03	10.96	108.6	105.6	94.9	98.9	95.2	96.8
P08294	Extracellular superoxide dismutase [Cu-Zn] OS=Homo sapiens OX=9606 GN=SOD3 PE=1 SV=2	23	4	10	4	240	25.8	6.61	20.8	100.2	120.7	85.4	112	76.2	105.6
P07996	Thrombospondin-1 OS=Homo sapiens OX=9606 GN=THBS1 PE=1 SV=2	10	11	12	11	1170	129.3	4.94	16.56	95.4	104.5	78.9	105	82.4	133.8
P55008	Allograft inflammatory factor 1 OS=Homo sapiens OX=9606 GN=AIF1 PE=1 SV=1	49	9	16	9	147	16.7	6.24	19.27	106.5	79.4	95.9	96.6	129.5	92.1
Q13126	S-methyl-5'-thioadenosine phosphorylase OS=Homo sapiens OX=9606 GN=MTAP PE=1 SV=2	33	7	11	7	283	31.2	7.18	19.58	85.1	92.4	120.4	106.5	100.2	95.4
Q7Z2W4	Zinc finger CCCH-type antiviral protein 1 OS=Homo sapiens OX=9606 GN=ZC3HAV1 PE=1 SV=3	14	10	12	10	902	101.4	8.4	14.6	93.1	91.4	124.8	91.6	116.6	82.5
Q99733	Nucleosome assembly protein 1-like 4 OS=Homo sapiens OX=9606 GN=NAP1L4 PE=1 SV=1	20	8	15	7	375	42.8	4.69	24.83	98.2	107.1	110.5	107.8	79.1	97.3
O75828	Carbonyl reductase [NADPH] 3 OS=Homo sapiens OX=9606 GN=CBR3 PE=1 SV=3	30	5	10	3	277	30.8	6.18	20.53	94.7	88.1	124.6	94.2	110	88.4
Q13442	28 kDa heat- and acid-stable phosphoprotein OS=Homo sapiens OX=9606 GN=PDAP1 PE=1 SV=1	39	9	12	9	181	20.6	8.87	11.66	98.9	91.2	137.4	84.5	102.9	85.1
Q9ULC5	Long-chain-fatty-acid--CoA ligase 5 OS=Homo sapiens OX=9606 GN=ACSL5 PE=1 SV=1	14	8	12	7	683	75.9	6.92	16.18	94.4	94.8	112.5	98.4	103.8	96.2
P35659	Protein DEK OS=Homo sapiens OX=9606 GN=DEK PE=1 SV=1	21	9	13	9	375	42.6	8.56	15.05	98.9	87.3	136.7	81.9	114	81.1
P50213	Isocitrate dehydrogenase [NAD] subunit alpha, mitochondrial OS=Homo sapiens OX=9606 GN=IDH3A PE=1 SV=1	20	8	12	8	366	39.6	6.92	22.94	107.3	83.3	116.4	83.1	119.6	90.3
Q9H479	Fructosamine-3-kinase OS=Homo sapiens OX=9606 GN=FN3K PE=1 SV=1	31	8	10	8	309	35.1	7.55	18.3	86.2	102.5	107.8	118.9	91.4	93.2
P19404	NADH dehydrogenase [ubiquinone] flavoprotein 2, mitochondrial OS=Homo sapiens OX=9606 GN=NDUFV2 PE=1 SV=2	35	7	12	7	249	27.4	8.06	16.09	97.9	99.4	102.5	91.3	112.5	96.5
Q8NCW5	NAD(P)H-hydrate epimerase OS=Homo sapiens OX=9606 GN=NAXE PE=1 SV=2	29	8	11	8	288	31.7	7.66	19.85	89.9	85.1	123.2	81.9	136.8	83.1
Q04837	Single-stranded DNA-binding protein, mitochondrial OS=Homo sapiens OX=9606 GN=SSBP1 PE=1 SV=1	39	5	11	5	148	17.2	9.6	23.81	82.3	84.1	189.6	70.5	111.3	62.2
Q99996	A-kinase anchor protein 9 OS=Homo sapiens OX=9606 GN=AKAP9 PE=1 SV=4	3	12	13	12	3907	452.7	4.98	12.97	93.9	93.4	112.8	77.4	135	87.6
Q96JY6	PDZ and LIM domain protein 2 OS=Homo sapiens OX=9606 GN=PDLIM2 PE=1 SV=1	30	8	14	8	352	37.4	8.72	29.81	131	110.7	85	103.2	76.2	93.9
P99999	Cytochrome c OS=Homo sapiens OX=9606 GN=CYCS PE=1 SV=2	39	4	10	4	105	11.7	9.57	22.91	89.1	82.7	151.1	81.7	112.5	82.9
P43121	Cell surface glycoprotein MUC18 OS=Homo sapiens OX=9606 GN=MCAM PE=1 SV=2	16	9	12	9	646	71.6	5.76	13.72	119.6	101.1	73.3	118.3	92.3	95.3
O14964	Hepatocyte growth factor-regulated tyrosine kinase substrate OS=Homo sapiens OX=9606 GN=HGS PE=1 SV=1	14	11	16	11	777	86.1	6.16	16.83	104.8	93.7	111.4	89.1	109.8	91.1
P61163	Alpha-centractin OS=Homo sapiens OX=9606 GN=ACTR1A PE=1 SV=1	24	7	10	5	376	42.6	6.64	15.98	108.7	93.4	93.9	95	120.8	88.2
Q9HB71	Calcyclin-binding protein OS=Homo sapiens OX=9606 GN=CACYBP PE=1 SV=2	39	7	10	7	228	26.2	8.25	14.82	92.4	79.5	138.3	76.2	139.5	74.2
Q9UNZ2	NSFL1 cofactor p47 OS=Homo sapiens OX=9606 GN=NSFL1C PE=1 SV=2	33	9	15	9	370	40.5	5.1	9.4	104.9	103	97.8	105	95.8	93.6
O15031	Plexin-B2 OS=Homo sapiens OX=9606 GN=PLXNB2 PE=1 SV=3	7	12	12	12	1838	205	6.24	16.76	110.1	98.3	103.6	96.3	104.4	87.3
Q07020	60S ribosomal protein L18 OS=Homo sapiens OX=9606 GN=RPL18 PE=1 SV=2	37	7	17	7	188	21.6	11.72	22.75	97.6	85.1	116.7	87.1	129	84.4
Q9UHL4	Dipeptidyl peptidase 2 OS=Homo sapiens OX=9606 GN=DPP7 PE=1 SV=3	17	7	12	7	492	54.3	6.32	17.34	81.4	85.8	92.6	93.1	147.4	99.7
Q13464	Rho-associated protein kinase 1 OS=Homo sapiens OX=9606 GN=ROCK1 PE=1 SV=1	8	11	15	9	1354	158.1	5.9	12.88	106.8	104.5	100.2	100.6	97.3	90.6
P01911	HLA class II histocompatibility antigen, DRB1 beta chain OS=Homo sapiens OX=9606 GN=HLA-DRB1 PE=1 SV=2	40	7	10	3	266	29.9	7.74	21.11	81.5	63.6	110.9	74.8	143.3	125.8
P30626	Sorcin OS=Homo sapiens OX=9606 GN=SRI PE=1 SV=1	46	8	17	8	198	21.7	5.59	26.64	88.7	96.1	136.3	85.2	105.6	88.2
Q8NC56	LEM domain-containing protein 2 OS=Homo sapiens OX=9606 GN=LEMD2 PE=1 SV=1	24	9	12	9	503	56.9	9	17.3	102.6	90.2	131.1	79	122	75.1
Q16629	Serine/arginine-rich splicing factor 7 OS=Homo sapiens OX=9606 GN=SRSF7 PE=1 SV=1	28	7	14	6	238	27.4	11.82	21.08	101.6	83	130.7	76.7	126	82.1
O76021	Ribosomal L1 domain-containing protein 1 OS=Homo sapiens OX=9606 GN=RSL1D1 PE=1 SV=3	21	9	11	9	490	54.9	10.13	11.59	91.5	87.4	118.4	84.6	129.4	88.7
P11217	Glycogen phosphorylase, muscle form OS=Homo sapiens OX=9606 GN=PYGM PE=1 SV=6	11	9	12	1	842	97	7.03	22.91	107	59.2	116.1	69.7	154.1	94
Q9UJZ1	Stomatin-like protein 2, mitochondrial OS=Homo sapiens OX=9606 GN=STOML2 PE=1 SV=1	26	7	12	7	356	38.5	7.39	19.05	90.2	85.5	122.8	91.3	110.6	99.6
P23368	NAD-dependent malic enzyme, mitochondrial OS=Homo sapiens OX=9606 GN=ME2 PE=1 SV=1	16	9	13	9	584	65.4	7.61	20.83	97.5	90.5	111.9	85.5	123.8	90.8
P53992	Protein transport protein Sec24C OS=Homo sapiens OX=9606 GN=SEC24C PE=1 SV=3	11	9	11	9	1094	118.2	7.06	17.13	103.3	83.5	118	82.3	132.1	80.8
Q9H4A3	Serine/threonine-protein kinase WNK1 OS=Homo sapiens OX=9606 GN=WNK1 PE=1 SV=2	6	12	13	12	2382	250.6	6.34	11.06	94.1	108.3	108	90.4	106	93.3
P31942	Heterogeneous nuclear ribonucleoprotein H3 OS=Homo sapiens OX=9606 GN=HNRNPH3 PE=1 SV=2	20	6	13	5	346	36.9	6.87	17.28	105.6	99.4	109.2	99.1	95	91.7
P26583	High mobility group protein B2 OS=Homo sapiens OX=9606 GN=HMGB2 PE=1 SV=2	33	9	13	9	209	24	7.81	11.48	94.6	88.1	145.3	83	94.5	94.7
O43237	Cytoplasmic dynein 1 light intermediate chain 2 OS=Homo sapiens OX=9606 GN=DYNC1LI2 PE=1 SV=1	16	7	13	7	492	54.1	6.38	19.34	109.6	86.3	123.9	98.2	92.3	89.8
Q9P0K7	Ankycorbin OS=Homo sapiens OX=9606 GN=RAI14 PE=1 SV=2	11	10	10	10	980	110	6.21	14.47	101.7	98.2	116	86.4	113.3	84.4
Q96AG4	Leucine-rich repeat-containing protein 59 OS=Homo sapiens OX=9606 GN=LRRC59 PE=1 SV=1	30	9	14	9	307	34.9	9.57	21.41	94.2	74.1	142.1	74.7	131.8	83.2
Q9UKS6	Protein kinase C and casein kinase substrate in neurons protein 3 OS=Homo sapiens OX=9606 GN=PACSIN3 PE=1 SV=2	29	11	12	11	424	48.5	6.18	13.57	98.1	98.8	107.9	83	127.7	84.4
P48637	Glutathione synthetase OS=Homo sapiens OX=9606 GN=GSS PE=1 SV=1	21	9	10	9	474	52.4	5.92	16.03	102.5	101.8	95.6	103.6	100.1	96.4
Q99747	Gamma-soluble NSF attachment protein OS=Homo sapiens OX=9606 GN=NAPG PE=1 SV=1	23	8	12	8	312	34.7	5.41	10.99	102	90.5	127.5	83.2	117.8	79.1
P55327	Tumor protein D52 OS=Homo sapiens OX=9606 GN=TPD52 PE=1 SV=2	32	7	10	7	224	24.3	4.83	17.08	95	94.6	88.9	88.3	145.2	88.1
P84098	60S ribosomal protein L19 OS=Homo sapiens OX=9606 GN=RPL19 PE=1 SV=1	26	6	14	6	196	23.5	11.47	23.41	96.6	90	108.9	90.3	122.5	91.7
P53990	IST1 homolog OS=Homo sapiens OX=9606 GN=IST1 PE=1 SV=1	21	8	11	8	364	39.7	5.35	17.83	96.7	94.2	113.9	98.1	103.5	93.6
Q5JWF2	Guanine nucleotide-binding protein G(s) subunit alpha isoforms XLas OS=Homo sapiens OX=9606 GN=GNAS PE=1 SV=2	7	8	17	7	1037	111	5.03	31.08	106.7	99.8	89.1	97.6	107.7	99.1
Q93084	Sarcoplasmic/endoplasmic reticulum calcium ATPase 3 OS=Homo sapiens OX=9606 GN=ATP2A3 PE=1 SV=2	8	7	12	2	1043	113.9	5.57	24.58	107.7	107.5	82.6	93	98.7	110.5
P51148	Ras-related protein Rab-5C OS=Homo sapiens OX=9606 GN=RAB5C PE=1 SV=2	34	6	11	4	216	23.5	8.41	16.93	103.5	99.7	99.5	103.1	96.1	98.1
P24534	Elongation factor 1-beta OS=Homo sapiens OX=9606 GN=EEF1B2 PE=1 SV=3	35	7	13	6	225	24.7	4.67	25.55	97.6	85.9	118.4	88	118	92.2
O75165	DnaJ homolog subfamily C member 13 OS=Homo sapiens OX=9606 GN=DNAJC13 PE=1 SV=5	5	10	11	10	2243	254.3	6.74	9.18	97.2	98.1	95.5	96.3	117.1	95.8
Q9UII2	ATPase inhibitor, mitochondrial OS=Homo sapiens OX=9606 GN=ATP5IF1 PE=1 SV=1	25	4	13	4	106	12.2	9.35	30.08	79.6	77.9	181.7	76.6	107.9	76.2
P30085	UMP-CMP kinase OS=Homo sapiens OX=9606 GN=CMPK1 PE=1 SV=3	37	6	14	6	196	22.2	5.57	25.48	95.9	84.2	134.2	81.9	121.7	82.1
P13671	Complement component C6 OS=Homo sapiens OX=9606 GN=C6 PE=1 SV=3	11	10	12	10	934	104.7	6.76	11.41	93.6	105.3	78.6	110.1	82.1	130.3
Q96A08	Histone H2B type 1-A OS=Homo sapiens OX=9606 GN=H2BC1 PE=1 SV=3	42	6	151	1	127	14.2	10.32	175.87	122.4	84.7	105.3	112	83.4	92.2
O76070	Gamma-synuclein OS=Homo sapiens OX=9606 GN=SNCG PE=1 SV=2	68	8	9	8	127	13.3	4.86	16.24	120.4	113.9	80	113.2	71	101.5
Q9NTJ5	Phosphatidylinositide phosphatase SAC1 OS=Homo sapiens OX=9606 GN=SACM1L PE=1 SV=2	15	9	10	9	587	66.9	7.12	18.43	111.4	88.3	94	97.2	122	87
Q9BUT1	3-hydroxybutyrate dehydrogenase type 2 OS=Homo sapiens OX=9606 GN=BDH2 PE=1 SV=2	23	5	9	5	245	26.7	7.65	23.11	88	88.4	115.7	83	119.8	105.1
O75955	Flotillin-1 OS=Homo sapiens OX=9606 GN=FLOT1 PE=1 SV=3	24	9	11	9	427	47.3	7.49	15.73	94.5	95.7	122.6	87.3	109.9	90
Q9Y262	Eukaryotic translation initiation factor 3 subunit L OS=Homo sapiens OX=9606 GN=EIF3L PE=1 SV=1	16	9	11	9	564	66.7	6.34	22.66	98.9	96.5	107.6	97.9	104.8	94.2
P29692	Elongation factor 1-delta OS=Homo sapiens OX=9606 GN=EEF1D PE=1 SV=5	28	7	13	6	281	31.1	5.01	19.22	97.3	87.4	125.3	90.3	114.4	85.3
P15144	Aminopeptidase N OS=Homo sapiens OX=9606 GN=ANPEP PE=1 SV=4	10	9	11	9	967	109.5	5.48	18.89	91.9	90.5	144.8	88.4	106.6	77.7
Q07666	KH domain-containing, RNA-binding, signal transduction-associated protein 1 OS=Homo sapiens OX=9606 GN=KHDRBS1 PE=1 SV=1	10	6	14	6	443	48.2	8.66	33.86	91.1	84.6	138.2	84	118.9	83.1
Q14435	Polypeptide N-acetylgalactosaminyltransferase 3 OS=Homo sapiens OX=9606 GN=GALNT3 PE=1 SV=2	15	9	11	9	633	72.6	7.99	12.72	69.4	82.1	112.2	67.1	201.4	67.8
P19013	Keratin, type II cytoskeletal 4 OS=Homo sapiens OX=9606 GN=KRT4 PE=1 SV=4	15	9	19	5	534	57.3	6.61	20.05	156.9	123.6	80.4	88.6	73.7	76.9
P51610	Host cell factor 1 OS=Homo sapiens OX=9606 GN=HCFC1 PE=1 SV=2	8	11	11	11	2035	208.6	7.46	9.15	96.3	90.6	125.7	82.6	111.5	93.1
P16949	Stathmin OS=Homo sapiens OX=9606 GN=STMN1 PE=1 SV=3	44	7	14	7	149	17.3	5.97	18.38	99.3	90.5	131.1	85.1	99	94.9
O60841	Eukaryotic translation initiation factor 5B OS=Homo sapiens OX=9606 GN=EIF5B PE=1 SV=4	10	9	10	9	1220	138.7	5.49	13.07	104.1	92.5	115.4	93.4	104.2	90.4
P00167	Cytochrome b5 OS=Homo sapiens OX=9606 GN=CYB5A PE=1 SV=2	27	3	18	3	134	15.3	4.96	52.25	99.4	88.5	90.3	84.3	163.8	73.6
Q7L1Q6	Basic leucine zipper and W2 domain-containing protein 1 OS=Homo sapiens OX=9606 GN=BZW1 PE=1 SV=1	16	7	10	7	419	48	5.92	16.83	98.1	86.3	125.1	89.3	114	87.2
P11678	Eosinophil peroxidase OS=Homo sapiens OX=9606 GN=EPX PE=1 SV=2	12	9	14	6	715	81	10.29	22.41	103.3	91.8	59.8	105.9	109.5	129.7
Q9H8H3	Methyltransferase-like protein 7A OS=Homo sapiens OX=9606 GN=METTL7A PE=1 SV=1	22	4	13	4	244	28.3	8.38	26.27	102.6	90.8	100.1	92.8	124.8	88.9
P05386	60S acidic ribosomal protein P1 OS=Homo sapiens OX=9606 GN=RPLP1 PE=1 SV=1	52	2	7	2	114	11.5	4.32	25.02	84.6	116.2	81.3	127.8	92.8	97.3
Q13938	Calcyphosin OS=Homo sapiens OX=9606 GN=CAPS PE=1 SV=2	28	7	8	7	275	30.2	6.04	17.02	116.1	158.9	84.6	73.5	91.9	75
O43719	HIV Tat-specific factor 1 OS=Homo sapiens OX=9606 GN=HTATSF1 PE=1 SV=1	20	12	13	12	755	85.8	4.4	14.06	83.4	88.9	162.5	83.5	98.4	83.3
P61421	V-type proton ATPase subunit d 1 OS=Homo sapiens OX=9606 GN=ATP6V0D1 PE=1 SV=1	18	6	12	6	351	40.3	5	18.57	100.3	84.7	124.7	83.7	120.8	85.8
Q6IBS0	Twinfilin-2 OS=Homo sapiens OX=9606 GN=TWF2 PE=1 SV=2	27	9	12	8	349	39.5	6.84	24.16	112.3	91.4	101	98.5	106	90.7
P18031	Tyrosine-protein phosphatase non-receptor type 1 OS=Homo sapiens OX=9606 GN=PTPN1 PE=1 SV=1	23	8	10	8	435	49.9	6.27	15.41	107.3	103.4	89.6	100.9	102.1	96.7
P62714	Serine/threonine-protein phosphatase 2A catalytic subunit beta isoform OS=Homo sapiens OX=9606 GN=PPP2CB PE=1 SV=1	27	6	12	1	309	35.6	5.43	15.59	104.1	98.6	102.5	91.5	107.1	96.2
O76094	Signal recognition particle subunit SRP72 OS=Homo sapiens OX=9606 GN=SRP72 PE=1 SV=3	18	10	11	10	671	74.6	9.26	9.19	97.6	93.6	113.6	95.8	105.5	94
Q9NR31	GTP-binding protein SAR1a OS=Homo sapiens OX=9606 GN=SAR1A PE=1 SV=1	27	6	9	3	198	22.4	6.68	19.96	99	91	95	94.2	133.3	87.4
P05198	Eukaryotic translation initiation factor 2 subunit 1 OS=Homo sapiens OX=9606 GN=EIF2S1 PE=1 SV=3	28	8	9	8	315	36.1	5.08	18.12	94.1	88.3	126.2	86.6	119.7	85.1
P55809	Succinyl-CoA:3-ketoacid coenzyme A transferase 1, mitochondrial OS=Homo sapiens OX=9606 GN=OXCT1 PE=1 SV=1	14	5	7	5	520	56.1	7.46	17.04	97.4	82.1	166.1	83.5	91.7	79.3
P13693	Translationally-controlled tumor protein OS=Homo sapiens OX=9606 GN=TPT1 PE=1 SV=1	27	4	11	4	172	19.6	4.93	15.98	108.9	102.2	99.2	98.8	97.1	93.9
P30622	CAP-Gly domain-containing linker protein 1 OS=Homo sapiens OX=9606 GN=CLIP1 PE=1 SV=2	9	11	11	8	1438	162.1	5.36	11.24	109.3	104.2	94.4	95.2	99.9	97.1
P05413	Fatty acid-binding protein, heart OS=Homo sapiens OX=9606 GN=FABP3 PE=1 SV=4	41	6	10	6	133	14.8	6.8	18.54	63.2	55.3	193.2	106.6	97.3	84.5
Q9NX63	MICOS complex subunit MIC19 OS=Homo sapiens OX=9606 GN=CHCHD3 PE=1 SV=1	26	8	15	8	227	26.1	8.28	28.03	104.7	84.6	130	79.6	116.2	84.9
Q0VF96	Cingulin-like protein 1 OS=Homo sapiens OX=9606 GN=CGNL1 PE=1 SV=2	10	10	11	9	1302	149	5.67	10.35	114.3	101.9	97.9	99.3	89.2	97.4
P54886	Delta-1-pyrroline-5-carboxylate synthase OS=Homo sapiens OX=9606 GN=ALDH18A1 PE=1 SV=2	12	9	10	9	795	87.2	7.12	19.18	92.6	88.3	134.8	85.4	119.5	79.4
Q7Z4V5	Hepatoma-derived growth factor-related protein 2 OS=Homo sapiens OX=9606 GN=HDGFL2 PE=1 SV=1	12	8	11	6	671	74.3	7.49	17.84	92.3	108	100.3	105.4	96.8	97.2
Q9Y5Z4	Heme-binding protein 2 OS=Homo sapiens OX=9606 GN=HEBP2 PE=1 SV=1	36	7	14	7	205	22.9	4.63	15.65	99.8	95	120.5	91	103.2	90.5
Q8WUD1	Ras-related protein Rab-2B OS=Homo sapiens OX=9606 GN=RAB2B PE=1 SV=1	34	6	12	1	216	24.2	7.83	23.53	97.8	119.1	79.6	108.5	91.9	103.2
P49756	RNA-binding protein 25 OS=Homo sapiens OX=9606 GN=RBM25 PE=1 SV=3	11	8	9	8	843	100.1	6.32	12.53	86.1	86.1	172.2	67.6	113	75
Q9ULA0	Aspartyl aminopeptidase OS=Homo sapiens OX=9606 GN=DNPEP PE=1 SV=1	20	9	12	9	475	52.4	7.42	14.73	110.3	105.1	91.2	99.8	92.9	100.7
Q9NQ48	Leucine zipper transcription factor-like protein 1 OS=Homo sapiens OX=9606 GN=LZTFL1 PE=1 SV=1	26	7	9	7	299	34.6	5.36	12.62	94.5	113.6	94.1	99.3	100.6	97.8
Q9H6S3	Epidermal growth factor receptor kinase substrate 8-like protein 2 OS=Homo sapiens OX=9606 GN=EPS8L2 PE=1 SV=2	12	8	11	8	715	80.6	6.84	13.8	104.4	108.5	91	92.1	113.6	90.4
P14927	Cytochrome b-c1 complex subunit 7 OS=Homo sapiens OX=9606 GN=UQCRB PE=1 SV=2	62	7	10	7	111	13.5	8.78	22.46	99.9	83.6	130.1	85.2	114	87.1
Q9Y4P3	Transducin beta-like protein 2 OS=Homo sapiens OX=9606 GN=TBL2 PE=1 SV=1	22	9	10	9	447	49.8	9.44	16.22	87.4	73.7	130	76.4	151.1	81.4
P26447	Protein S100-A4 OS=Homo sapiens OX=9606 GN=S100A4 PE=1 SV=1	37	5	19	5	101	11.7	6.11	30.1	125.1	120.7	77.8	109.9	74.4	92.1
P08134	Rho-related GTP-binding protein RhoC OS=Homo sapiens OX=9606 GN=RHOC PE=1 SV=1	25	5	16	1	193	22	6.58	22.61	113.5	104.4	117	93.6	89	82.4
Q14126	Desmoglein-2 OS=Homo sapiens OX=9606 GN=DSG2 PE=1 SV=2	10	8	8	8	1118	122.2	5.24	11.22	82.1	83.3	136.6	79.2	132.2	86.8
Q8TBC4	NEDD8-activating enzyme E1 catalytic subunit OS=Homo sapiens OX=9606 GN=UBA3 PE=1 SV=2	23	8	8	8	463	51.8	5.45	14.22	92.5	91.2	119.6	91.1	114.2	91.3
P09917	Arachidonate 5-lipoxygenase OS=Homo sapiens OX=9606 GN=ALOX5 PE=1 SV=2	15	9	12	9	674	77.9	5.77	13.41	102.8	95.7	91.3	107.3	108.1	94.8
P41226	Ubiquitin-like modifier-activating enzyme 7 OS=Homo sapiens OX=9606 GN=UBA7 PE=1 SV=2	12	9	10	9	1012	111.6	6.04	13.41	102.4	97.3	93.4	93.8	119.3	93.7
Q96E39	RNA binding motif protein, X-linked-like-1 OS=Homo sapiens OX=9606 GN=RBMXL1 PE=1 SV=1	24	10	19	2	390	42.1	9.89	29.36	101.6	90.9	123.7	85.6	113.5	84.7
A6NI72	Putative neutrophil cytosol factor 1B OS=Homo sapiens OX=9606 GN=NCF1B PE=5 SV=2	25	9	9	9	391	44.8	9.13	15.81	110.7	100	89.7	100.7	102.2	96.7
P16070	CD44 antigen OS=Homo sapiens OX=9606 GN=CD44 PE=1 SV=3	10	6	16	6	742	81.5	5.33	25.16	103.4	92	81.4	84.7	152	86.5
P53041	Serine/threonine-protein phosphatase 5 OS=Homo sapiens OX=9606 GN=PPP5C PE=1 SV=1	15	8	12	8	499	56.8	6.28	16.24	102.3	93.4	105.1	92.8	114.8	91.7
P51114	Fragile X mental retardation syndrome-related protein 1 OS=Homo sapiens OX=9606 GN=FXR1 PE=1 SV=3	16	8	10	7	621	69.7	6.15	12.17	101.8	95.5	111.8	81.7	115.5	93.6
Q16134	Electron transfer flavoprotein-ubiquinone oxidoreductase, mitochondrial OS=Homo sapiens OX=9606 GN=ETFDH PE=1 SV=2	17	10	10	10	617	68.5	7.55	11.48	96.5	88.3	126	83.6	123.2	82.4
Q08495	Dematin OS=Homo sapiens OX=9606 GN=DMTN PE=1 SV=3	21	8	11	7	405	45.5	8.88	13.4	82.5	127.5	65.6	138.4	68.4	117.6
P63208	S-phase kinase-associated protein 1 OS=Homo sapiens OX=9606 GN=SKP1 PE=1 SV=2	33	5	9	5	163	18.6	4.54	17.26	96.2	90.1	127.4	84.9	111.6	89.7
Q16775	Hydroxyacylglutathione hydrolase, mitochondrial OS=Homo sapiens OX=9606 GN=HAGH PE=1 SV=2	21	6	11	6	308	33.8	8.12	22.12	95.4	106.6	98.7	97.1	102.3	99.9
P67775	Serine/threonine-protein phosphatase 2A catalytic subunit alpha isoform OS=Homo sapiens OX=9606 GN=PPP2CA PE=1 SV=1	27	6	12	1	309	35.6	5.54	15.59
P52948	Nuclear pore complex protein Nup98-Nup96 OS=Homo sapiens OX=9606 GN=NUP98 PE=1 SV=4	6	12	12	12	1817	197.5	6.4	9.98	101.5	87.9	115.4	89	116	90.1
Q8NFJ5	Retinoic acid-induced protein 3 OS=Homo sapiens OX=9606 GN=GPRC5A PE=1 SV=2	15	5	13	5	357	40.2	8.15	26.89	137.1	117.6	52.3	120.9	69.4	102.7
Q6NVY1	3-hydroxyisobutyryl-CoA hydrolase, mitochondrial OS=Homo sapiens OX=9606 GN=HIBCH PE=1 SV=2	27	10	13	10	386	43.5	8.19	9.88	88.2	86.1	143.1	83.6	112.1	86.9
P29622	Kallistatin OS=Homo sapiens OX=9606 GN=SERPINA4 PE=1 SV=3	25	9	12	9	427	48.5	7.75	8.63	100.8	127.4	72.9	111.9	73.7	113.3
Q9NVI7	ATPase family AAA domain-containing protein 3A OS=Homo sapiens OX=9606 GN=ATAD3A PE=1 SV=2	18	10	12	5	634	71.3	8.98	15.93	80.9	86.1	167.1	90.9	86.4	88.6
O94925	Glutaminase kidney isoform, mitochondrial OS=Homo sapiens OX=9606 GN=GLS PE=1 SV=1	17	10	12	10	669	73.4	7.77	13.2	91.4	79.1	142.2	71.2	146.5	69.7
Q12929	Epidermal growth factor receptor kinase substrate 8 OS=Homo sapiens OX=9606 GN=EPS8 PE=1 SV=1	14	8	10	8	822	91.8	7.5	6.33	89.4	86.2	102	86.7	150.6	85.1
P11215	Integrin alpha-M OS=Homo sapiens OX=9606 GN=ITGAM PE=1 SV=2	8	7	10	7	1152	127.1	7.23	19.52	108.8	100.9	88.2	91.8	109.5	100.9
P46977	Dolichyl-diphosphooligosaccharide--protein glycosyltransferase subunit STT3A OS=Homo sapiens OX=9606 GN=STT3A PE=1 SV=2	10	7	12	7	705	80.5	8.07	15.5	95.4	79.6	134.1	84.6	122.5	83.9
Q9P2R7	Succinate--CoA ligase [ADP-forming] subunit beta, mitochondrial OS=Homo sapiens OX=9606 GN=SUCLA2 PE=1 SV=3	15	8	9	8	463	50.3	7.42	21.23	105.4	99.2	98.9	100.9	99.4	96.2
Q9Y5S2	Serine/threonine-protein kinase MRCK beta OS=Homo sapiens OX=9606 GN=CDC42BPB PE=1 SV=2	7	11	11	10	1711	194.2	6.37	8.49	100.1	105.7	97.9	102	91.9	102.5
Q8N8S7	Protein enabled homolog OS=Homo sapiens OX=9606 GN=ENAH PE=1 SV=2	16	11	13	11	591	66.5	6.93	14.01	113.7	96.3	98.2	80.4	121.8	89.5
P08397	Porphobilinogen deaminase OS=Homo sapiens OX=9606 GN=HMBS PE=1 SV=2	25	9	13	9	361	39.3	7.18	18.04	85.5	107.7	91.2	120.8	94.3	100.5
P14780	Matrix metalloproteinase-9 OS=Homo sapiens OX=9606 GN=MMP9 PE=1 SV=3	17	9	9	9	707	78.4	6.06	16.48	127.2	134.3	69.2	89.8	66.7	112.7
P07305	Histone H1.0 OS=Homo sapiens OX=9606 GN=H1-0 PE=1 SV=3	28	5	17	5	194	20.9	10.84	31.7	106.7	103.7	116.7	78.5	111.4	82.9
O60504	Vinexin OS=Homo sapiens OX=9606 GN=SORBS3 PE=1 SV=2	14	9	14	9	671	75.3	9.45	15.09	121.6	113.4	84.5	109.9	76.6	94.1
Q9UMR2	ATP-dependent RNA helicase DDX19B OS=Homo sapiens OX=9606 GN=DDX19B PE=1 SV=1	26	10	12	10	479	53.9	6.3	13.82	100	102.3	122	93	95.2	87.5
Q9UBE0	SUMO-activating enzyme subunit 1 OS=Homo sapiens OX=9606 GN=SAE1 PE=1 SV=1	27	9	9	9	346	38.4	5.3	13.66	107.2	89.5	118.1	90.1	106.7	88.4
O95373	Importin-7 OS=Homo sapiens OX=9606 GN=IPO7 PE=1 SV=1	8	8	8	8	1038	119.4	4.82	17.14	83.7	120.9	103.5	101.3	105	85.4
Q9NRV9	Heme-binding protein 1 OS=Homo sapiens OX=9606 GN=HEBP1 PE=1 SV=1	47	7	13	7	189	21.1	5.8	17.72	98.9	100.2	91.7	102.1	117.9	89.2
Q9NTK5	Obg-like ATPase 1 OS=Homo sapiens OX=9606 GN=OLA1 PE=1 SV=2	28	11	17	11	396	44.7	7.81	20.06	92.7	91	125.4	92.2	110.4	88.3
Q15008	26S proteasome non-ATPase regulatory subunit 6 OS=Homo sapiens OX=9606 GN=PSMD6 PE=1 SV=1	24	8	8	8	389	45.5	5.62	12.83	103.4	100.8	106.7	91.3	112	85.7
O14936	Peripheral plasma membrane protein CASK OS=Homo sapiens OX=9606 GN=CASK PE=1 SV=3	10	8	10	8	926	105.1	6.43	7.81	85.8	82.8	151.7	71	127.2	81.5
P39023	60S ribosomal protein L3 OS=Homo sapiens OX=9606 GN=RPL3 PE=1 SV=2	19	9	15	9	403	46.1	10.18	18.69	97.9	82.3	117.6	81.6	136.2	84.4
Q96FW1	Ubiquitin thioesterase OTUB1 OS=Homo sapiens OX=9606 GN=OTUB1 PE=1 SV=2	32	6	11	6	271	31.3	4.94	15.15	100.6	89.4	129.7	84.1	103.8	92.4
P28288	ATP-binding cassette sub-family D member 3 OS=Homo sapiens OX=9606 GN=ABCD3 PE=1 SV=1	13	8	9	8	659	75.4	9.36	11.58	100.9	84.5	131	81.3	119.8	82.4
P20774	Mimecan OS=Homo sapiens OX=9606 GN=OGN PE=1 SV=1	18	5	15	5	298	33.9	5.63	29.04	69.3	83.5	59	90.5	77.7	220
P15941	Mucin-1 OS=Homo sapiens OX=9606 GN=MUC1 PE=1 SV=3	5	6	9	6	1255	122	7.47	18.45	73.1	60.2	104.6	62.8	231.4	67.8
P61201	COP9 signalosome complex subunit 2 OS=Homo sapiens OX=9606 GN=COPS2 PE=1 SV=1	28	11	13	11	443	51.6	5.53	18.06	96.3	107.5	97.9	101.6	103.6	93.1
O15382	Branched-chain-amino-acid aminotransferase, mitochondrial OS=Homo sapiens OX=9606 GN=BCAT2 PE=1 SV=2	31	9	11	9	392	44.3	8.65	14.42	93.9	117.6	109.2	87.5	106.1	85.6
Q9H3P7	Golgi resident protein GCP60 OS=Homo sapiens OX=9606 GN=ACBD3 PE=1 SV=4	19	7	7	7	528	60.6	5.06	14.23	87.6	79.6	116.6	86.7	148.5	81
P18583	Protein SON OS=Homo sapiens OX=9606 GN=SON PE=1 SV=4	6	11	11	11	2426	263.7	5.64	5.23	97.2	78.5	128	83.1	121.9	91.3
P29992	Guanine nucleotide-binding protein subunit alpha-11 OS=Homo sapiens OX=9606 GN=GNA11 PE=1 SV=2	17	6	11	2	359	42.1	5.69	20.06	111.4	107.6	88.4	105.7	88.8	98
Q99729	Heterogeneous nuclear ribonucleoprotein A/B OS=Homo sapiens OX=9606 GN=HNRNPAB PE=1 SV=2	18	6	12	5	332	36.2	8.21	17.36	96	77.1	137.9	80.9	122.5	85.7
Q9Y5B9	FACT complex subunit SPT16 OS=Homo sapiens OX=9606 GN=SUPT16H PE=1 SV=1	10	11	13	11	1047	119.8	5.66	15.32	97.7	89.6	137.1	84.5	104.4	86.8
Q9UMX0	Ubiquilin-1 OS=Homo sapiens OX=9606 GN=UBQLN1 PE=1 SV=2	12	5	7	2	589	62.5	5.11	17.66	100.5	107.4	107.4	98.1	92.8	93.8
P49589	Cysteine--tRNA ligase, cytoplasmic OS=Homo sapiens OX=9606 GN=CARS PE=1 SV=3	14	9	11	9	748	85.4	6.76	19.33	104.7	106.7	97.1	103.6	88.5	99.4
Q15155	Nodal modulator 1 OS=Homo sapiens OX=9606 GN=NOMO1 PE=1 SV=5	10	9	11	9	1222	134.2	5.81	13.98	89.9	83.3	112.3	87.4	135	92.1
P29466	Caspase-1 OS=Homo sapiens OX=9606 GN=CASP1 PE=1 SV=1	19	7	11	7	404	45.1	5.91	15.37	99.7	90	98.2	99.5	118.3	94.2
P46781	40S ribosomal protein S9 OS=Homo sapiens OX=9606 GN=RPS9 PE=1 SV=3	29	8	16	8	194	22.6	10.65	37.3	96.9	79.8	122.7	85.5	131.7	83.4
Q5JRX3	Presequence protease, mitochondrial OS=Homo sapiens OX=9606 GN=PITRM1 PE=1 SV=3	9	8	9	8	1037	117.3	6.92	14.19	97.7	82.7	126.3	72.2	138.6	82.4
O94826	Mitochondrial import receptor subunit TOM70 OS=Homo sapiens OX=9606 GN=TOMM70 PE=1 SV=1	14	10	12	10	608	67.4	7.12	18.33	95.1	86.4	133.1	84	118.7	82.7
Q9UHX1	Poly(U)-binding-splicing factor PUF60 OS=Homo sapiens OX=9606 GN=PUF60 PE=1 SV=1	15	7	10	7	559	59.8	5.29	12.3	96	79.1	138.9	80.5	124.5	80.9
Q00169	Phosphatidylinositol transfer protein alpha isoform OS=Homo sapiens OX=9606 GN=PITPNA PE=1 SV=2	33	7	11	7	270	31.8	6.55	9.56	100.1	117.8	95.4	92.1	106.5	88
Q9NSD9	Phenylalanine--tRNA ligase beta subunit OS=Homo sapiens OX=9606 GN=FARSB PE=1 SV=3	16	9	10	9	589	66.1	6.84	18.53	94.2	103.1	128.5	98.4	89.9	85.9
P62847	40S ribosomal protein S24 OS=Homo sapiens OX=9606 GN=RPS24 PE=1 SV=1	26	4	8	4	133	15.4	10.78	13.04	102.5	82.3	113.8	88.6	127.6	85.4
P04196	Histidine-rich glycoprotein OS=Homo sapiens OX=9606 GN=HRG PE=1 SV=1	15	8	11	8	525	59.5	7.5	20.74	92.9	114.2	74.3	117.8	79.1	121.7
Q96C86	m7GpppX diphosphatase OS=Homo sapiens OX=9606 GN=DCPS PE=1 SV=2	30	8	11	8	337	38.6	6.38	14.4	94.6	108.3	114.9	97.4	95.4	89.4
P08621	U1 small nuclear ribonucleoprotein 70 kDa OS=Homo sapiens OX=9606 GN=SNRNP70 PE=1 SV=2	21	10	12	10	437	51.5	9.94	10.33	90.2	101.9	133.1	82.6	111	81.1
Q5T5P2	Sickle tail protein homolog OS=Homo sapiens OX=9606 GN=KIAA1217 PE=1 SV=2	6	12	12	12	1943	214	7.06	10.53	117.4	120	91.2	97.3	76.9	97.3
Q13217	DnaJ homolog subfamily C member 3 OS=Homo sapiens OX=9606 GN=DNAJC3 PE=1 SV=1	21	10	10	10	504	57.5	6.15	8.87	92.5	77.8	128.6	80.8	137.1	83.3
P62993	Growth factor receptor-bound protein 2 OS=Homo sapiens OX=9606 GN=GRB2 PE=1 SV=1	40	9	9	9	217	25.2	6.32	18.09	108.7	95.5	103.9	98.8	104.4	88.7
O00233	26S proteasome non-ATPase regulatory subunit 9 OS=Homo sapiens OX=9606 GN=PSMD9 PE=1 SV=3	30	7	14	7	223	24.7	6.95	13.07	95.1	109.2	100	101.6	91.4	102.7
O75746	Calcium-binding mitochondrial carrier protein Aralar1 OS=Homo sapiens OX=9606 GN=SLC25A12 PE=1 SV=2	16	9	9	5	678	74.7	8.38	12.83	96.5	110.3	95.5	105.7	97.4	94.5
Q9NQ29	Putative RNA-binding protein Luc7-like 1 OS=Homo sapiens OX=9606 GN=LUC7L PE=1 SV=1	19	6	11	1	371	43.7	9.92	21.27	105.4	106.3	84.8	94.6	94.1	114.8
Q52LJ0	Protein FAM98B OS=Homo sapiens OX=9606 GN=FAM98B PE=1 SV=2	18	6	12	4	433	45.5	8.69	13.38	97.8	98.5	111	89.5	112.1	91.1
P31323	cAMP-dependent protein kinase type II-beta regulatory subunit OS=Homo sapiens OX=9606 GN=PRKAR2B PE=1 SV=3	11	4	7	2	418	46.3	4.92	17.01	113.3	105.9	97.4	112.7	80.5	90.3
Q16698	2,4-dienoyl-CoA reductase, mitochondrial OS=Homo sapiens OX=9606 GN=DECR1 PE=1 SV=1	21	6	11	6	335	36	9.28	21.14	102.6	86.2	116.6	91.2	115.9	87.5
P52790	Hexokinase-3 OS=Homo sapiens OX=9606 GN=HK3 PE=1 SV=2	10	8	10	8	923	99	5.4	19.03	103.9	104.4	88.1	97.8	111.4	94.5
P83731	60S ribosomal protein L24 OS=Homo sapiens OX=9606 GN=RPL24 PE=1 SV=1	35	7	11	7	157	17.8	11.25	15.66	102.3	86.1	123.1	83.8	123.8	81
O00160	Unconventional myosin-If OS=Homo sapiens OX=9606 GN=MYO1F PE=1 SV=3	11	12	13	12	1098	124.8	9.11	10.59	79.3	73.8	78	84.7	66.3	218
Q9H299	SH3 domain-binding glutamic acid-rich-like protein 3 OS=Homo sapiens OX=9606 GN=SH3BGRL3 PE=1 SV=1	47	5	11	5	93	10.4	4.93	20.05	106.1	88.8	111.8	98.3	101.8	93.2
Q9NUV9	GTPase IMAP family member 4 OS=Homo sapiens OX=9606 GN=GIMAP4 PE=1 SV=1	29	8	12	8	329	37.5	7.81	18.64	126.6	119.3	82.5	120.6	69.7	81.3
P00736	Complement C1r subcomponent OS=Homo sapiens OX=9606 GN=C1R PE=1 SV=2	15	9	10	9	705	80.1	6.21	18.93	77	107	81.3	131.6	76.9	126.2
Q9NVD7	Alpha-parvin OS=Homo sapiens OX=9606 GN=PARVA PE=1 SV=1	19	6	10	5	372	42.2	5.95	21.24	115.6	110.8	92.7	102.7	89.4	88.8
P21589	5'-nucleotidase OS=Homo sapiens OX=9606 GN=NT5E PE=1 SV=1	20	10	11	9	574	63.3	7.03	14.5	89.4	91.3	92.7	87.1	148.6	90.9
P19012	Keratin, type I cytoskeletal 15 OS=Homo sapiens OX=9606 GN=KRT15 PE=1 SV=3	11	7	21	2	456	49.2	4.77	39.59	100.8	98.8	132.8	66	129.9	71.7
Q15631	Translin OS=Homo sapiens OX=9606 GN=TSN PE=1 SV=1	36	7	10	7	228	26.2	6.44	15.44	99.8	98.9	114.6	91.1	104.1	91.5
P0DMN0	Sulfotransferase 1A4 OS=Homo sapiens OX=9606 GN=SULT1A4 PE=1 SV=1	29	6	11	3	295	34.2	6.01	27.11	122.5	120.3	83.8	104	82.8	86.6
Q9HB40	Retinoid-inducible serine carboxypeptidase OS=Homo sapiens OX=9606 GN=SCPEP1 PE=1 SV=1	14	6	10	6	452	50.8	5.81	20.58	89.9	90.4	126.9	104.1	92.5	96.2
P21912	Succinate dehydrogenase [ubiquinone] iron-sulfur subunit, mitochondrial OS=Homo sapiens OX=9606 GN=SDHB PE=1 SV=3	29	8	11	8	280	31.6	8.76	13.59	97.7	93.3	102.8	95.5	119.6	91.1
P12955	Xaa-Pro dipeptidase OS=Homo sapiens OX=9606 GN=PEPD PE=1 SV=3	21	8	10	8	493	54.5	6	7.45	109.3	104.2	93.6	103.1	92.5	97.3
Q12904	Aminoacyl tRNA synthase complex-interacting multifunctional protein 1 OS=Homo sapiens OX=9606 GN=AIMP1 PE=1 SV=2	30	6	12	6	312	34.3	8.43	14.12	95.1	87.6	129.1	90.1	115.7	82.5
O60234	Glia maturation factor gamma OS=Homo sapiens OX=9606 GN=GMFG PE=1 SV=1	41	6	13	5	142	16.8	5.26	19.06	107.9	106.8	84.4	103.4	102.8	94.6
Q9UBG0	C-type mannose receptor 2 OS=Homo sapiens OX=9606 GN=MRC2 PE=1 SV=2	8	9	10	9	1479	166.6	5.83	12.26	106.9	105.6	102.2	87.2	101.9	96.3
P20674	Cytochrome c oxidase subunit 5A, mitochondrial OS=Homo sapiens OX=9606 GN=COX5A PE=1 SV=2	38	7	10	7	150	16.8	6.79	14.18	107.3	78.9	133.6	81.2	111.9	87.1
P22059	Oxysterol-binding protein 1 OS=Homo sapiens OX=9606 GN=OSBP PE=1 SV=1	13	10	10	10	807	89.4	7.3	15.09	90.3	92.4	113.4	83.5	131.1	89.2
Q12888	TP53-binding protein 1 OS=Homo sapiens OX=9606 GN=TP53BP1 PE=1 SV=2	7	11	13	11	1972	213.4	4.7	4.01	90	94.3	128.1	94	108.3	85.3
Q7L2H7	Eukaryotic translation initiation factor 3 subunit M OS=Homo sapiens OX=9606 GN=EIF3M PE=1 SV=1	19	7	8	7	374	42.5	5.63	12.22	99.5	87.2	120.9	79.8	122.4	90.2
P49407	Beta-arrestin-1 OS=Homo sapiens OX=9606 GN=ARRB1 PE=1 SV=2	26	9	14	8	418	47	6.2	12.43	122.2	110.6	90.3	102.3	83.8	90.7
O94875	Sorbin and SH3 domain-containing protein 2 OS=Homo sapiens OX=9606 GN=SORBS2 PE=1 SV=3	10	9	11	9	1100	124	8.31	9.59	111.2	107.3	98.5	100	91.8	91.2
Q16881	Thioredoxin reductase 1, cytoplasmic OS=Homo sapiens OX=9606 GN=TXNRD1 PE=1 SV=3	15	8	9	7	649	70.9	7.39	14.66	108.1	92.7	93.9	104.9	101.2	99.2
O95292	Vesicle-associated membrane protein-associated protein B/C OS=Homo sapiens OX=9606 GN=VAPB PE=1 SV=3	33	7	10	6	243	27.2	7.3	20.74	97.6	88.4	145.3	82	116.7	70
Q16576	Histone-binding protein RBBP7 OS=Homo sapiens OX=9606 GN=RBBP7 PE=1 SV=1	22	7	14	3	425	47.8	5.05	22.72	97.2	98.3	104	97.4	101.6	101.5
P23193	Transcription elongation factor A protein 1 OS=Homo sapiens OX=9606 GN=TCEA1 PE=1 SV=2	35	9	9	8	301	33.9	8.38	18.11	94.1	96.6	111.1	95.6	107.5	95.1
Q04446	1,4-alpha-glucan-branching enzyme OS=Homo sapiens OX=9606 GN=GBE1 PE=1 SV=3	10	6	9	6	702	80.4	6.32	17.88	104.3	111.9	97.4	99.2	88.3	98.9
P12931	Proto-oncogene tyrosine-protein kinase Src OS=Homo sapiens OX=9606 GN=SRC PE=1 SV=3	16	8	11	3	536	59.8	7.42	16.86	102.6	105.6	86	111.8	97.7	96.3
Q9BT78	COP9 signalosome complex subunit 4 OS=Homo sapiens OX=9606 GN=COPS4 PE=1 SV=1	23	7	8	7	406	46.2	5.83	17.81	94.3	93.7	111.3	95.4	109.3	96
O95817	BAG family molecular chaperone regulator 3 OS=Homo sapiens OX=9606 GN=BAG3 PE=1 SV=3	22	10	11	10	575	61.6	6.95	10.56	114.8	92.4	94.4	93.3	106.6	98.6
P42126	Enoyl-CoA delta isomerase 1, mitochondrial OS=Homo sapiens OX=9606 GN=ECI1 PE=1 SV=1	21	6	10	6	302	32.8	8.54	18.43	91.6	90.3	135.8	86.6	102.6	93
Q68CZ2	Tensin-3 OS=Homo sapiens OX=9606 GN=TNS3 PE=1 SV=2	9	10	11	7	1445	155.2	6.81	8.95	114.6	101.6	93.2	114.5	97.3	78.9
Q09028	Histone-binding protein RBBP4 OS=Homo sapiens OX=9606 GN=RBBP4 PE=1 SV=3	22	7	14	3	425	47.6	4.89	27.65	96.9	80	144.2	74.6	123.6	80.7
Q14344	Guanine nucleotide-binding protein subunit alpha-13 OS=Homo sapiens OX=9606 GN=GNA13 PE=1 SV=2	25	9	13	7	377	44	8	15.01	103.5	108.2	90.6	109.3	90.3	98
Q93009	Ubiquitin carboxyl-terminal hydrolase 7 OS=Homo sapiens OX=9606 GN=USP7 PE=1 SV=2	9	10	10	10	1102	128.2	5.55	17.89	95.2	103.8	104.5	91.3	108.3	96.9
P05156	Complement factor I OS=Homo sapiens OX=9606 GN=CFI PE=1 SV=2	15	8	11	8	583	65.7	7.5	12.63	98.1	109.8	76.6	103	85.7	126.8
Q15185	Prostaglandin E synthase 3 OS=Homo sapiens OX=9606 GN=PTGES3 PE=1 SV=1	30	4	11	4	160	18.7	4.54	23.1	92.5	82.2	129.1	79.6	139.1	77.4
Q9H4G4	Golgi-associated plant pathogenesis-related protein 1 OS=Homo sapiens OX=9606 GN=GLIPR2 PE=1 SV=3	47	5	8	5	154	17.2	9.41	10.72	96.6	104.9	78.3	121.7	88.3	110.3
P62316	Small nuclear ribonucleoprotein Sm D2 OS=Homo sapiens OX=9606 GN=SNRPD2 PE=1 SV=1	56	6	12	6	118	13.5	9.91	20.3	90.2	81.8	139.1	82.8	132	74.1
P51159	Ras-related protein Rab-27A OS=Homo sapiens OX=9606 GN=RAB27A PE=1 SV=3	26	5	10	5	221	24.9	5.22	16.81	95.1	92.4	109.8	90.5	123.2	88.9
Q9BPW8	Protein NipSnap homolog 1 OS=Homo sapiens OX=9606 GN=NIPSNAP1 PE=1 SV=1	21	5	11	3	284	33.3	9.31	17.98	80.2	89.3	163	91.3	94.8	81.3
O14828	Secretory carrier-associated membrane protein 3 OS=Homo sapiens OX=9606 GN=SCAMP3 PE=1 SV=3	27	7	10	7	347	38.3	7.64	4.95	90.1	71.4	125.8	70.1	169	73.6
Q92804	TATA-binding protein-associated factor 2N OS=Homo sapiens OX=9606 GN=TAF15 PE=1 SV=1	15	6	12	4	592	61.8	8.02	15.01	103.7	74.6	147.4	87.6	110.5	76.2
P62917	60S ribosomal protein L8 OS=Homo sapiens OX=9606 GN=RPL8 PE=1 SV=2	26	5	13	5	257	28	11.03	20.8	98.8	80	113.2	87.1	128.4	92.4
Q12874	Splicing factor 3A subunit 3 OS=Homo sapiens OX=9606 GN=SF3A3 PE=1 SV=1	21	8	9	8	501	58.8	5.38	12.31	91.9	91.8	118.6	93.3	113.6	90.9
Q53GG5	PDZ and LIM domain protein 3 OS=Homo sapiens OX=9606 GN=PDLIM3 PE=1 SV=1	21	6	11	6	364	39.2	6.89	14.86	105.8	106.2	107.3	96.9	84	99.9
Q9UNM6	26S proteasome non-ATPase regulatory subunit 13 OS=Homo sapiens OX=9606 GN=PSMD13 PE=1 SV=2	23	8	11	8	376	42.9	5.81	12.89	96.9	101.1	107.5	97.1	101.7	95.7
O00571	ATP-dependent RNA helicase DDX3X OS=Homo sapiens OX=9606 GN=DDX3X PE=1 SV=3	15	9	10	8	662	73.2	7.18	14.89	99	92.2	119.4	97.1	109.6	82.7
P61326	Protein mago nashi homolog OS=Homo sapiens OX=9606 GN=MAGOH PE=1 SV=1	53	7	11	7	146	17.2	6.11	7.85	92.1	96.1	112.6	92.7	115.4	91.1
Q14CN4	Keratin, type II cytoskeletal 72 OS=Homo sapiens OX=9606 GN=KRT72 PE=1 SV=2	6	5	14	1	511	55.8	6.89	28.4	86.2	95.3	93	99.6	128.9	97
P17813	Endoglin OS=Homo sapiens OX=9606 GN=ENG PE=1 SV=2	10	5	7	5	658	70.5	6.61	15.94	95.5	93.2	109.5	106.2	96.1	99.5
P36543	V-type proton ATPase subunit E 1 OS=Homo sapiens OX=9606 GN=ATP6V1E1 PE=1 SV=1	31	8	10	8	226	26.1	8	7.46	95.5	89.7	113.3	99.5	109.5	92.5
Q00013	55 kDa erythrocyte membrane protein OS=Homo sapiens OX=9606 GN=MPP1 PE=1 SV=2	20	8	10	8	466	52.3	7.37	12.73	88.3	111.4	84.6	119.6	83.9	112.2
P16219	Short-chain specific acyl-CoA dehydrogenase, mitochondrial OS=Homo sapiens OX=9606 GN=ACADS PE=1 SV=1	16	6	8	6	412	44.3	7.99	19.69	99.5	104.4	96	86.8	118	95.2
P02462	Collagen alpha-1(IV) chain OS=Homo sapiens OX=9606 GN=COL4A1 PE=1 SV=4	2	3	15	3	1669	160.5	8.28	25.96	129.3	98.4	94	106	80.8	91.4
Q14108	Lysosome membrane protein 2 OS=Homo sapiens OX=9606 GN=SCARB2 PE=1 SV=2	14	7	14	7	478	54.3	5.14	15.89	86.4	86.3	110.4	82.3	148.3	86.3
Q13884	Beta-1-syntrophin OS=Homo sapiens OX=9606 GN=SNTB1 PE=1 SV=3	18	10	10	9	538	58	8.63	15.04	126	123.8	89	96	77.3	87.9
P13987	CD59 glycoprotein OS=Homo sapiens OX=9606 GN=CD59 PE=1 SV=1	25	4	17	4	128	14.2	6.48	31.75	130.6	92.6	81.9	92	104.5	98.4
P26639	Threonine--tRNA ligase 1, cytoplasmic OS=Homo sapiens OX=9606 GN=TARS1 PE=1 SV=3	12	9	10	9	723	83.4	6.67	12.47	103.2	95.1	110.6	93.3	107.5	90.3
Q8N5K1	CDGSH iron-sulfur domain-containing protein 2 OS=Homo sapiens OX=9606 GN=CISD2 PE=1 SV=1	50	6	10	6	135	15.3	9.61	22.24	85.4	86	129.5	90.2	117	91.9
P60228	Eukaryotic translation initiation factor 3 subunit E OS=Homo sapiens OX=9606 GN=EIF3E PE=1 SV=1	22	10	10	10	445	52.2	6.04	18.59	102.4	92.1	113.4	92.3	108	91.8
P08708	40S ribosomal protein S17 OS=Homo sapiens OX=9606 GN=RPS17 PE=1 SV=2	48	5	7	5	135	15.5	9.85	11.36	99.9	100.7	104.7	98.9	107.5	88.3
O15372	Eukaryotic translation initiation factor 3 subunit H OS=Homo sapiens OX=9606 GN=EIF3H PE=1 SV=1	18	6	11	6	352	39.9	6.54	9.78	101.8	105.9	106.6	95	99	91.7
Q96RW7	Hemicentin-1 OS=Homo sapiens OX=9606 GN=HMCN1 PE=1 SV=2	2	13	13	13	5635	613	6.49	10.26	99.9	88.5	114.6	88.5	105.5	103.1
P07947	Tyrosine-protein kinase Yes OS=Homo sapiens OX=9606 GN=YES1 PE=1 SV=3	13	7	10	2	543	60.8	6.74	14.53	119.3	114.7	78.3	99.9	89	98.8
P25787	Proteasome subunit alpha type-2 OS=Homo sapiens OX=9606 GN=PSMA2 PE=1 SV=2	32	7	11	7	234	25.9	7.43	20.06	99.3	99.3	117.2	104.4	86.4	93.4
Q05397	Focal adhesion kinase 1 OS=Homo sapiens OX=9606 GN=PTK2 PE=1 SV=2	11	11	11	11	1052	119.2	6.62	13.62	109.3	104.3	104.2	85.9	110.4	85.9
Q969X5	Endoplasmic reticulum-Golgi intermediate compartment protein 1 OS=Homo sapiens OX=9606 GN=ERGIC1 PE=1 SV=1	33	8	9	8	290	32.6	7.06	15.53	89.1	79.9	148.4	84.6	109.6	88.4
P20020	Plasma membrane calcium-transporting ATPase 1 OS=Homo sapiens OX=9606 GN=ATP2B1 PE=1 SV=4	7	7	9	1	1220	134.6	5.91	13.62	114.9	92.6	103.7	92.4	100.4	96
Q9BZQ8	Protein Niban 1 OS=Homo sapiens OX=9606 GN=NIBAN1 PE=1 SV=1	9	8	12	8	928	103.1	4.78	13.81	103	97.9	100.6	103.8	94.4	100.3
P39656	Dolichyl-diphosphooligosaccharide--protein glycosyltransferase 48 kDa subunit OS=Homo sapiens OX=9606 GN=DDOST PE=1 SV=4	12	5	15	5	456	50.8	6.55	19.18	95.1	81.2	119.8	83.8	133.7	86.4
Q9H307	Pinin OS=Homo sapiens OX=9606 GN=PNN PE=1 SV=5	15	9	11	9	717	81.6	7.14	9.81	98.1	83.6	135.6	77.7	122.3	82.7
Q12931	Heat shock protein 75 kDa, mitochondrial OS=Homo sapiens OX=9606 GN=TRAP1 PE=1 SV=3	13	9	11	8	704	80.1	8.21	21.73	89.2	97	136.2	87.3	106.2	84
Q03518	Antigen peptide transporter 1 OS=Homo sapiens OX=9606 GN=TAP1 PE=1 SV=2	6	4	6	4	808	87.2	8.02	15.64	90.7	124	100.2	110.2	87.1	87.8
Q66K74	Microtubule-associated protein 1S OS=Homo sapiens OX=9606 GN=MAP1S PE=1 SV=2	9	7	10	7	1059	112.1	7.3	10.83	102.5	94	100.8	94.4	117	91.2
P26006	Integrin alpha-3 OS=Homo sapiens OX=9606 GN=ITGA3 PE=1 SV=5	7	7	9	7	1051	116.5	6.77	12.49	126.4	113.2	78.9	109.6	85.6	86.4
Q92608	Dedicator of cytokinesis protein 2 OS=Homo sapiens OX=9606 GN=DOCK2 PE=1 SV=2	6	10	10	10	1830	211.8	6.87	7.83	106.2	94.6	92.8	101	103.7	101.7
P27169	Serum paraoxonase/arylesterase 1 OS=Homo sapiens OX=9606 GN=PON1 PE=1 SV=3	19	6	9	5	355	39.7	5.22	12.29	86.5	100.3	92.3	121.5	89.1	110.2
P11234	Ras-related protein Ral-B OS=Homo sapiens OX=9606 GN=RALB PE=1 SV=1	20	4	10	3	206	23.4	6.62	18.06	109.4	103.8	90.4	101.8	97.3	97.4
Q9UL18	Protein argonaute-1 OS=Homo sapiens OX=9606 GN=AGO1 PE=1 SV=3	12	9	10	3	857	97.2	9.16	12.34	101	95.6	107.9	96.4	104.1	94.9
P45954	Short/branched chain specific acyl-CoA dehydrogenase, mitochondrial OS=Homo sapiens OX=9606 GN=ACADSB PE=1 SV=1	24	8	9	8	432	47.5	6.99	12.48	85.8	79.6	104.6	84.2	169.4	76.4
Q9NSK0	Kinesin light chain 4 OS=Homo sapiens OX=9606 GN=KLC4 PE=1 SV=3	17	9	9	7	619	68.6	6.18	9.95	87.9	115.1	110.9	94.6	99.1	92.4
Q9NWH9	SAFB-like transcription modulator OS=Homo sapiens OX=9606 GN=SLTM PE=1 SV=2	11	10	10	10	1034	117.1	7.87	9.09	97.3	85	122.4	72.5	141.9	81
Q12907	Vesicular integral-membrane protein VIP36 OS=Homo sapiens OX=9606 GN=LMAN2 PE=1 SV=1	17	6	12	6	356	40.2	6.95	15.68	90.9	80.9	126.2	80.8	127.4	93.8
P42330	Aldo-keto reductase family 1 member C3 OS=Homo sapiens OX=9606 GN=AKR1C3 PE=1 SV=4	26	7	11	2	323	36.8	7.94	17.64	87.2	88.5	153.6	74.4	113.2	83.1
Q9BVG4	Protein PBDC1 OS=Homo sapiens OX=9606 GN=PBDC1 PE=1 SV=1	33	7	8	7	233	26	4.79	13.67	87.4	99.5	127	95.3	99.1	91.8
Q8ND71	GTPase IMAP family member 8 OS=Homo sapiens OX=9606 GN=GIMAP8 PE=2 SV=2	15	9	10	9	665	74.8	8.34	14.02	114.9	124.3	74.2	118.3	70.7	97.5
Q99426	Tubulin-folding cofactor B OS=Homo sapiens OX=9606 GN=TBCB PE=1 SV=2	27	6	8	6	244	27.3	5.15	18.08	112.4	106.2	111.1	88.8	91.8	89.8
O43396	Thioredoxin-like protein 1 OS=Homo sapiens OX=9606 GN=TXNL1 PE=1 SV=3	29	5	7	5	289	32.2	4.96	14.2	92.4	100.7	115.3	102	99.6	90
P05114	Non-histone chromosomal protein HMG-14 OS=Homo sapiens OX=9606 GN=HMGN1 PE=1 SV=3	32	5	12	5	100	10.7	9.6	17.87	106.7	75.5	139.4	73.3	130	75
P10599	Thioredoxin OS=Homo sapiens OX=9606 GN=TXN PE=1 SV=3	43	4	17	4	105	11.7	4.92	28.5	80.6	81.1	172.4	80.9	98.8	86.2
Q15637	Splicing factor 1 OS=Homo sapiens OX=9606 GN=SF1 PE=1 SV=4	14	5	6	5	639	68.3	8.98	11.17	96.1	95.1	124.2	78.9	119.3	86.3
Q9UIG0	Tyrosine-protein kinase BAZ1B OS=Homo sapiens OX=9606 GN=BAZ1B PE=1 SV=2	7	7	7	7	1483	170.8	8.48	14.85	84.2	103.8	101.5	108.6	101.6	100.3
P16278	Beta-galactosidase OS=Homo sapiens OX=9606 GN=GLB1 PE=1 SV=2	14	7	9	7	677	76	6.57	11.6	83.6	77.7	125.6	76.7	147.3	89.1
Q6UVK1	Chondroitin sulfate proteoglycan 4 OS=Homo sapiens OX=9606 GN=CSPG4 PE=1 SV=2	5	8	8	8	2322	250.4	5.47	10.32	113.1	130	81	99.9	81.5	94.5
Q9BWM7	Sideroflexin-3 OS=Homo sapiens OX=9606 GN=SFXN3 PE=1 SV=3	23	6	11	5	321	35.5	9.1	13.39	97.7	94.7	105.8	100.6	105.4	95.7
Q9HAV7	GrpE protein homolog 1, mitochondrial OS=Homo sapiens OX=9606 GN=GRPEL1 PE=1 SV=2	30	6	8	6	217	24.3	8.12	14.59	86.3	79.2	152.6	84	116.1	81.9
Q8IV08	5'-3' exonuclease PLD3 OS=Homo sapiens OX=9606 GN=PLD3 PE=1 SV=1	15	6	11	6	490	54.7	6.47	15.36	91.2	86.4	95.5	100.5	129.8	96.7
O43252	Bifunctional 3'-phosphoadenosine 5'-phosphosulfate synthase 1 OS=Homo sapiens OX=9606 GN=PAPSS1 PE=1 SV=2	15	8	11	7	624	70.8	6.86	6.33	96.8	86.8	114.3	90.4	126.2	85.5
P55087	Aquaporin-4 OS=Homo sapiens OX=9606 GN=AQP4 PE=1 SV=2	17	5	9	5	323	34.8	7.66	12.09	114.2	95.9	89.8	113.3	95.2	91.7
Q5VYK3	Proteasome adapter and scaffold protein ECM29 OS=Homo sapiens OX=9606 GN=ECPAS PE=1 SV=2	5	8	9	8	1845	204.2	7.12	9.98	103	110.9	104.7	90.5	103.7	87.2
P46779	60S ribosomal protein L28 OS=Homo sapiens OX=9606 GN=RPL28 PE=1 SV=3	34	6	10	6	137	15.7	12.02	18.32	104.8	75.4	119.4	77.9	142.8	79.7
O43681	ATPase ASNA1 OS=Homo sapiens OX=9606 GN=ASNA1 PE=1 SV=2	22	6	9	6	348	38.8	4.91	17.61	95.8	94.1	107.3	93.4	107.4	102
Q12979	Active breakpoint cluster region-related protein OS=Homo sapiens OX=9606 GN=ABR PE=1 SV=2	11	9	10	9	859	97.5	6.55	14.6	102.3	85.9	105.1	86.4	125	95.4
P53007	Tricarboxylate transport protein, mitochondrial OS=Homo sapiens OX=9606 GN=SLC25A1 PE=1 SV=2	14	4	7	4	311	34	9.89	14.93	100.1	81.2	132.3	88.7	120.6	77.1
P07357	Complement component C8 alpha chain OS=Homo sapiens OX=9606 GN=C8A PE=1 SV=2	15	6	8	6	584	65.1	6.47	10.76	94.5	110.3	67.4	100.6	85.8	141.3
Q9BR76	Coronin-1B OS=Homo sapiens OX=9606 GN=CORO1B PE=1 SV=1	14	8	11	8	489	54.2	5.88	21.08	103	91.7	101.5	103.5	99.1	101.2
O15173	Membrane-associated progesterone receptor component 2 OS=Homo sapiens OX=9606 GN=PGRMC2 PE=1 SV=1	19	5	8	3	223	23.8	4.88	19.07	105.1	106.4	93.9	103.1	96.4	95.2
O95747	Serine/threonine-protein kinase OSR1 OS=Homo sapiens OX=9606 GN=OXSR1 PE=1 SV=1	15	6	13	5	527	58	6.43	12.54	101.5	111.9	97	105.1	90.2	94.4
Q96IU4	Protein ABHD14B OS=Homo sapiens OX=9606 GN=ABHD14B PE=1 SV=1	26	4	10	4	210	22.3	6.4	15.01	97.6	92.2	137.4	98.3	82	92.4
P17812	CTP synthase 1 OS=Homo sapiens OX=9606 GN=CTPS1 PE=1 SV=2	13	7	8	6	591	66.6	6.46	13.38	81.5	96.4	136.8	88.9	110.7	85.7
P40199	Carcinoembryonic antigen-related cell adhesion molecule 6 OS=Homo sapiens OX=9606 GN=CEACAM6 PE=1 SV=3	24	5	9	5	344	37.2	5.82	12.7	110.9	88.7	137.3	98.9	59.6	104.6
O75351	Vacuolar protein sorting-associated protein 4B OS=Homo sapiens OX=9606 GN=VPS4B PE=1 SV=2	21	8	11	7	444	49.3	7.23	12.1	102.8	98.1	96.6	99.5	107.1	95.9
P39060	Collagen alpha-1(XVIII) chain OS=Homo sapiens OX=9606 GN=COL18A1 PE=1 SV=5	4	6	10	6	1754	178.1	6.01	14.4	105.6	115.9	95.5	109.4	76.5	97
P55083	Microfibril-associated glycoprotein 4 OS=Homo sapiens OX=9606 GN=MFAP4 PE=1 SV=2	18	4	11	4	255	28.6	5.63	21.03	99.6	90.5	61.7	81.8	96.4	170
Q8TD55	Pleckstrin homology domain-containing family O member 2 OS=Homo sapiens OX=9606 GN=PLEKHO2 PE=1 SV=1	16	7	8	7	490	53.3	5.43	14.98	110	101.5	87.9	119.3	82.4	98.9
O75531	Barrier-to-autointegration factor OS=Homo sapiens OX=9606 GN=BANF1 PE=1 SV=1	44	3	11	3	89	10.1	6.09	20.75	95.8	95.7	127.6	79.6	125.6	75.8
Q5TZA2	Rootletin OS=Homo sapiens OX=9606 GN=CROCC PE=1 SV=1	6	11	13	11	2017	228.4	5.5	13.1	106.1	110.9	107	89.8	98.2	88
O00232	26S proteasome non-ATPase regulatory subunit 12 OS=Homo sapiens OX=9606 GN=PSMD12 PE=1 SV=3	16	8	10	8	456	52.9	7.65	10.28	105.4	95.7	113.1	91.5	105.5	88.8
P33151	Cadherin-5 OS=Homo sapiens OX=9606 GN=CDH5 PE=1 SV=5	11	8	10	8	784	87.5	5.43	10.01	118.4	129.1	69.1	119.3	66.4	97.7
Q96BM9	ADP-ribosylation factor-like protein 8A OS=Homo sapiens OX=9606 GN=ARL8A PE=1 SV=1	44	7	10	4	186	21.4	7.77	17.56	97.6	101.3	90.3	91.4	128.2	91.2
Q9HCC0	Methylcrotonoyl-CoA carboxylase beta chain, mitochondrial OS=Homo sapiens OX=9606 GN=MCCC2 PE=1 SV=1	15	6	8	6	563	61.3	7.68	14.16	86.7	105.1	131.3	98.2	84	94.7
Q07075	Glutamyl aminopeptidase OS=Homo sapiens OX=9606 GN=ENPEP PE=1 SV=3	11	10	11	10	957	109.2	5.47	10.87	135.3	117.8	73.4	102.8	77	93.6
A5YKK6	CCR4-NOT transcription complex subunit 1 OS=Homo sapiens OX=9606 GN=CNOT1 PE=1 SV=2	4	9	9	9	2376	266.8	7.11	12.15	94.7	110.6	100.1	100.9	99	94.7
O00170	AH receptor-interacting protein OS=Homo sapiens OX=9606 GN=AIP PE=1 SV=2	28	8	9	8	330	37.6	6.29	14.57	103.4	95.7	109.3	93.8	113.7	84
P13284	Gamma-interferon-inducible lysosomal thiol reductase OS=Homo sapiens OX=9606 GN=IFI30 PE=1 SV=3	20	4	10	4	250	27.9	4.88	18.39	130.9	86.9	89.9	80.5	120.4	91.5
P02786	Transferrin receptor protein 1 OS=Homo sapiens OX=9606 GN=TFRC PE=1 SV=2	11	7	7	7	760	84.8	6.61	16.22	125.2	96	89.7	120.3	76.4	92.4
O75347	Tubulin-specific chaperone A OS=Homo sapiens OX=9606 GN=TBCA PE=1 SV=3	51	8	14	8	108	12.8	5.29	13.44	97.4	101.5	125.7	93.9	95.1	86.2
Q15437	Protein transport protein Sec23B OS=Homo sapiens OX=9606 GN=SEC23B PE=1 SV=2	14	9	11	8	767	86.4	6.89	12.9	92.9	90.5	101.7	91	132.7	91.2
Q08174	Protocadherin-1 OS=Homo sapiens OX=9606 GN=PCDH1 PE=1 SV=2	9	8	10	8	1060	114.7	5.03	8.93	120.4	123.1	75.3	119.8	73.1	88.4
P40855	Peroxisomal biogenesis factor 19 OS=Homo sapiens OX=9606 GN=PEX19 PE=1 SV=1	24	5	7	5	299	32.8	4.34	17.74	87.9	88.5	128.2	91.9	112.6	91
Q9NQT8	Kinesin-like protein KIF13B OS=Homo sapiens OX=9606 GN=KIF13B PE=1 SV=2	5	8	8	7	1826	202.7	5.88	13.92	99.4	108.3	105.3	95.2	99.1	92.7
Q9BZ29	Dedicator of cytokinesis protein 9 OS=Homo sapiens OX=9606 GN=DOCK9 PE=1 SV=2	5	8	10	8	2069	236.3	7.49	9.19	114.4	108	96.5	102.9	87.5	90.8
Q9NVJ2	ADP-ribosylation factor-like protein 8B OS=Homo sapiens OX=9606 GN=ARL8B PE=1 SV=1	35	5	9	2	186	21.5	8.43	16.78	104.2	85.4	95.9	91.6	140.8	82.1
P42226	Signal transducer and activator of transcription 6 OS=Homo sapiens OX=9606 GN=STAT6 PE=1 SV=1	12	10	11	10	847	94.1	6.23	17.01	97.1	92.7	93.7	101.5	117.1	97.9
O00178	GTP-binding protein 1 OS=Homo sapiens OX=9606 GN=GTPBP1 PE=1 SV=3	9	5	8	5	669	72.4	8.34	9.88	100	114.5	91.8	106.7	82.3	104.6
P17174	Aspartate aminotransferase, cytoplasmic OS=Homo sapiens OX=9606 GN=GOT1 PE=1 SV=3	18	6	6	6	413	46.2	7.01	15.11	90.8	106.2	93.8	108.5	99.7	101.1
Q14554	Protein disulfide-isomerase A5 OS=Homo sapiens OX=9606 GN=PDIA5 PE=1 SV=1	18	8	10	8	519	59.6	7.91	9.97	91.1	99	117.2	87.5	121.9	83.3
O75477	Erlin-1 OS=Homo sapiens OX=9606 GN=ERLIN1 PE=1 SV=2	22	7	11	5	348	39.1	7.87	9.14	92.5	91.7	112.3	94.6	113.5	95.4
Q6GMV3	Putative peptidyl-tRNA hydrolase PTRHD1 OS=Homo sapiens OX=9606 GN=PTRHD1 PE=1 SV=1	31	5	10	5	140	15.8	9.1	18.89	101.1	94.3	110.5	91	113.1	90
O95861	3'(2'),5'-bisphosphate nucleotidase 1 OS=Homo sapiens OX=9606 GN=BPNT1 PE=1 SV=1	24	7	12	6	308	33.4	5.69	18.55	90.6	93	119.5	91.8	125.5	79.6
Q9H444	Charged multivesicular body protein 4b OS=Homo sapiens OX=9606 GN=CHMP4B PE=1 SV=1	30	7	10	7	224	24.9	4.82	10.12	100.4	92.5	125.2	87.7	101.8	92.4
Q93050	V-type proton ATPase 116 kDa subunit a isoform 1 OS=Homo sapiens OX=9606 GN=ATP6V0A1 PE=1 SV=3	14	9	10	9	837	96.4	6.43	8.28	96.7	96.2	112.6	92.5	112.7	89.4
Q6VY07	Phosphofurin acidic cluster sorting protein 1 OS=Homo sapiens OX=9606 GN=PACS1 PE=1 SV=2	9	6	9	6	963	104.8	7.74	8.62	105.7	90	98.2	104.1	99.2	102.8
Q6ZMI0	Protein phosphatase 1 regulatory subunit 21 OS=Homo sapiens OX=9606 GN=PPP1R21 PE=1 SV=1	12	6	7	6	780	88.3	6.84	11.46	98.8	100.7	91.2	109.3	96.2	103.7
P14649	Myosin light chain 6B OS=Homo sapiens OX=9606 GN=MYL6B PE=1 SV=1	21	4	20	1	208	22.8	5.73	27.43	100	95.2	133.1	84.6	115.8	71.3
Q12882	Dihydropyrimidine dehydrogenase [NADP(+)] OS=Homo sapiens OX=9606 GN=DPYD PE=1 SV=2	10	8	9	8	1025	111.3	7.05	5.37	89.5	87.5	122.8	72.5	146.9	80.9
Q86XP3	ATP-dependent RNA helicase DDX42 OS=Homo sapiens OX=9606 GN=DDX42 PE=1 SV=1	12	8	9	8	938	102.9	7.02	10.02	95.6	89.1	128.1	88.2	102.8	96.2
Q13347	Eukaryotic translation initiation factor 3 subunit I OS=Homo sapiens OX=9606 GN=EIF3I PE=1 SV=1	23	7	10	7	325	36.5	5.64	17.81	98.7	94.6	115.6	89.6	112.1	89.3
Q2TAY7	WD40 repeat-containing protein SMU1 OS=Homo sapiens OX=9606 GN=SMU1 PE=1 SV=2	17	7	11	7	513	57.5	7.18	7.87	102.3	86.6	123.5	85.9	116.4	85.2
P59998	Actin-related protein 2/3 complex subunit 4 OS=Homo sapiens OX=9606 GN=ARPC4 PE=1 SV=3	32	6	14	6	168	19.7	8.43	29.41	107	95.7	101.2	97.7	106.7	91.7
Q14166	Tubulin--tyrosine ligase-like protein 12 OS=Homo sapiens OX=9606 GN=TTLL12 PE=1 SV=2	11	6	8	6	644	74.4	5.53	14.06	99.9	100.4	109.6	92.1	103.1	94.8
P61086	Ubiquitin-conjugating enzyme E2 K OS=Homo sapiens OX=9606 GN=UBE2K PE=1 SV=3	42	7	10	7	200	22.4	5.44	12.78	89.9	94.6	118.6	89	120.3	87.6
P07948	Tyrosine-protein kinase Lyn OS=Homo sapiens OX=9606 GN=LYN PE=1 SV=3	19	8	10	6	512	58.5	7.11	15.9	102.2	92.5	111.3	96.1	107.4	90.7
P09497	Clathrin light chain B OS=Homo sapiens OX=9606 GN=CLTB PE=1 SV=1	25	7	10	7	229	25.2	4.64	16.12	109.6	95.7	104.7	90.4	109.3	90.3
P61088	Ubiquitin-conjugating enzyme E2 N OS=Homo sapiens OX=9606 GN=UBE2N PE=1 SV=1	42	5	16	5	152	17.1	6.57	24.22	98.2	97	96.7	107.5	104.1	96.5
Q9UMS4	Pre-mRNA-processing factor 19 OS=Homo sapiens OX=9606 GN=PRPF19 PE=1 SV=1	13	6	10	6	504	55.1	6.61	16.54	100.3	85	121.6	91.2	115.6	86.3
P83916	Chromobox protein homolog 1 OS=Homo sapiens OX=9606 GN=CBX1 PE=1 SV=1	28	5	7	4	185	21.4	4.93	10.36	103.1	89.5	122.4	85.8	108.1	91
P51531	Probable global transcription activator SNF2L2 OS=Homo sapiens OX=9606 GN=SMARCA2 PE=1 SV=2	6	9	10	5	1590	181.2	7.2	11.52	98.4	92.2	118.3	90.6	111	89.4
Q13555	Calcium/calmodulin-dependent protein kinase type II subunit gamma OS=Homo sapiens OX=9606 GN=CAMK2G PE=1 SV=4	12	6	8	4	558	62.6	7.83	18.64	96.1	104.1	86.8	99.2	115.4	98.4
O15400	Syntaxin-7 OS=Homo sapiens OX=9606 GN=STX7 PE=1 SV=4	28	6	10	6	261	29.8	5.55	16.01	107.8	105.9	98.4	105.6	88.3	94
Q71UI9	Histone H2A.V OS=Homo sapiens OX=9606 GN=H2AFV PE=1 SV=3	19	2	12	2	128	13.5	10.58	26.45	97.3	108.2	110	94.1	103.8	86.6
P09601	Heme oxygenase 1 OS=Homo sapiens OX=9606 GN=HMOX1 PE=1 SV=1	27	6	7	6	288	32.8	8.25	13.54	104.5	95.6	91.8	103.5	109	95.6
O00186	Syntaxin-binding protein 3 OS=Homo sapiens OX=9606 GN=STXBP3 PE=1 SV=2	13	8	9	8	592	67.7	7.8	10.66	107.8	99.6	98.5	99.9	95.5	98.7
P30533	Alpha-2-macroglobulin receptor-associated protein OS=Homo sapiens OX=9606 GN=LRPAP1 PE=1 SV=1	21	7	12	7	357	41.4	8.78	17.16	83.6	73.1	138	80.5	139.5	85.3
P03952	Plasma kallikrein OS=Homo sapiens OX=9606 GN=KLKB1 PE=1 SV=1	14	8	10	8	638	71.3	8.22	12.65	85.9	115.6	76.1	123.4	78.1	121
Q08AF3	Schlafen family member 5 OS=Homo sapiens OX=9606 GN=SLFN5 PE=1 SV=1	9	6	8	6	891	101	8.22	14.4	99.5	104.9	126	101.9	84.8	82.9
P61026	Ras-related protein Rab-10 OS=Homo sapiens OX=9606 GN=RAB10 PE=1 SV=1	37	7	15	4	200	22.5	8.38	27.5	106.7	91.2	107.7	92.6	111.8	89.9
Q14118	Dystroglycan OS=Homo sapiens OX=9606 GN=DAG1 PE=1 SV=2	10	8	10	8	895	97.4	8.56	12.55	114.8	121.5	80.3	101.7	82.6	99
Q96C23	Aldose 1-epimerase OS=Homo sapiens OX=9606 GN=GALM PE=1 SV=1	21	6	12	6	342	37.7	6.65	20.53	97.3	91.8	114.8	92.5	119.8	83.7
Q04828	Aldo-keto reductase family 1 member C1 OS=Homo sapiens OX=9606 GN=AKR1C1 PE=1 SV=1	22	7	10	2	323	36.8	7.88	19.86	108.7	90.7	152.6	83.5	79.8	84.7
Q9ULC4	Malignant T-cell-amplified sequence 1 OS=Homo sapiens OX=9606 GN=MCTS1 PE=1 SV=1	35	5	5	5	181	20.5	8.82	15.92	94.9	89.5	110.3	101.7	108	95.6
Q6PGP7	Tetratricopeptide repeat protein 37 OS=Homo sapiens OX=9606 GN=TTC37 PE=1 SV=1	7	11	11	11	1564	175.4	7.53	9.1	102.8	95.7	103.7	94.8	100.4	102.6
P09871	Complement C1s subcomponent OS=Homo sapiens OX=9606 GN=C1S PE=1 SV=1	9	5	8	5	688	76.6	4.96	12.67	77.3	121	70.4	139	65	127.2
Q14571	Inositol 1,4,5-trisphosphate receptor type 2 OS=Homo sapiens OX=9606 GN=ITPR2 PE=1 SV=2	4	10	11	4	2701	307.9	6.43	13.63	92.9	96.4	98.5	94.8	101.2	116.3
P62266	40S ribosomal protein S23 OS=Homo sapiens OX=9606 GN=RPS23 PE=1 SV=3	22	4	9	4	143	15.8	10.49	21.55	101.6	87.7	111.9	90.4	109.4	98.9
P15586	N-acetylglucosamine-6-sulfatase OS=Homo sapiens OX=9606 GN=GNS PE=1 SV=3	14	6	8	6	552	62	8.31	11.46	95.1	87.8	122.9	94.1	107	93.3
Q9P0M6	Core histone macro-H2A.2 OS=Homo sapiens OX=9606 GN=H2AFY2 PE=1 SV=3	26	7	8	7	372	40	9.69	14.85	97.3	97.9	106.3	95.3	96.5	106.7
P28062	Proteasome subunit beta type-8 OS=Homo sapiens OX=9606 GN=PSMB8 PE=1 SV=3	21	5	8	5	276	30.3	7.43	19.17	99.2	93.7	119.8	94.1	102.4	90.7
Q29RF7	Sister chromatid cohesion protein PDS5 homolog A OS=Homo sapiens OX=9606 GN=PDS5A PE=1 SV=1	6	8	9	5	1337	150.7	7.91	17.66	84.1	83.6	125.4	86.4	112.9	107.5
Q86Y82	Syntaxin-12 OS=Homo sapiens OX=9606 GN=STX12 PE=1 SV=1	24	5	6	5	276	31.6	5.59	11.3	108.2	103.9	97.6	105.5	94.3	90.4
P61457	Pterin-4-alpha-carbinolamine dehydratase OS=Homo sapiens OX=9606 GN=PCBD1 PE=1 SV=2	42	5	9	4	104	12	6.8	18.95	90.6	88.8	134.8	82.7	127.7	75.3
P30519	Heme oxygenase 2 OS=Homo sapiens OX=9606 GN=HMOX2 PE=1 SV=2	29	7	8	7	316	36	5.41	9.98	92.1	75.6	126.8	77.4	142.9	85.2
P12004	Proliferating cell nuclear antigen OS=Homo sapiens OX=9606 GN=PCNA PE=1 SV=1	25	6	9	6	261	28.8	4.69	17.27	94.2	85.7	137.3	86.9	110.9	85
P47985	Cytochrome b-c1 complex subunit Rieske, mitochondrial OS=Homo sapiens OX=9606 GN=UQCRFS1 PE=1 SV=2	21	5	10	5	274	29.6	8.32	18.72	104.7	90	111.7	97	108.2	88.4
Q96A33	Coiled-coil domain-containing protein 47 OS=Homo sapiens OX=9606 GN=CCDC47 PE=1 SV=1	19	8	10	8	483	55.8	4.87	17.14	89.2	75.2	148.2	81	130.9	75.5
Q14019	Coactosin-like protein OS=Homo sapiens OX=9606 GN=COTL1 PE=1 SV=3	42	6	12	6	142	15.9	5.67	14.36	106.1	77.2	89	99.3	131.4	97
P17252	Protein kinase C alpha type OS=Homo sapiens OX=9606 GN=PRKCA PE=1 SV=4	13	8	10	6	672	76.7	7.05	14.45	114.9	100	94.6	92.5	107	91.1
P55735	Protein SEC13 homolog OS=Homo sapiens OX=9606 GN=SEC13 PE=1 SV=3	27	5	8	5	322	35.5	5.48	10.74	92.7	92.5	111.7	89.6	122.1	91.4
P17301	Integrin alpha-2 OS=Homo sapiens OX=9606 GN=ITGA2 PE=1 SV=1	10	8	11	8	1181	129.2	5.31	13.16	90.4	98.1	96.2	92.2	125.6	97.4
P54619	5'-AMP-activated protein kinase subunit gamma-1 OS=Homo sapiens OX=9606 GN=PRKAG1 PE=1 SV=1	27	8	11	8	331	37.6	6.92	18.6	97.7	96.7	105.3	92.8	114.3	93.3
O00499	Myc box-dependent-interacting protein 1 OS=Homo sapiens OX=9606 GN=BIN1 PE=1 SV=1	13	6	6	5	593	64.7	5.06	14.52	104.1	109.6	90.8	106.4	94.9	94.1
P62942	Peptidyl-prolyl cis-trans isomerase FKBP1A OS=Homo sapiens OX=9606 GN=FKBP1A PE=1 SV=2	42	3	10	3	108	11.9	8.16	14.46	114	96.7	97.2	98.2	99.9	94.1
P02775	Platelet basic protein OS=Homo sapiens OX=9606 GN=PPBP PE=1 SV=3	33	5	9	5	128	13.9	8.79	17.23	78.4	105.1	70.3	119.3	77.2	149.8
P30837	Aldehyde dehydrogenase X, mitochondrial OS=Homo sapiens OX=9606 GN=ALDH1B1 PE=1 SV=3	14	6	8	4	517	57.2	6.8	19.38	95	100.5	116.9	89.8	95	102.9
Q9UBI6	Guanine nucleotide-binding protein G(I)/G(S)/G(O) subunit gamma-12 OS=Homo sapiens OX=9606 GN=GNG12 PE=1 SV=3	69	5	10	5	72	8	8.97	8.12	108.8	99.6	108.3	96.9	97.1	89.3
Q15126	Phosphomevalonate kinase OS=Homo sapiens OX=9606 GN=PMVK PE=1 SV=3	33	6	7	6	192	22	5.73	12.3	90	73.8	123.9	81.6	129.5	101.2
Q96TC7	Regulator of microtubule dynamics protein 3 OS=Homo sapiens OX=9606 GN=RMDN3 PE=1 SV=2	13	5	7	5	470	52.1	5.1	12.44	106.5	134.8	96.6	89.4	85	87.7
P43487	Ran-specific GTPase-activating protein OS=Homo sapiens OX=9606 GN=RANBP1 PE=1 SV=1	29	5	7	5	201	23.3	5.29	9.49	93.5	95.3	124.2	91.6	104.7	90.7
P62318	Small nuclear ribonucleoprotein Sm D3 OS=Homo sapiens OX=9606 GN=SNRPD3 PE=1 SV=1	32	3	7	3	126	13.9	10.32	14.22	87.2	99.9	113.7	101.8	109.8	87.5
P84090	Enhancer of rudimentary homolog OS=Homo sapiens OX=9606 GN=ERH PE=1 SV=1	34	3	8	3	104	12.3	5.92	12.2	99.9	67.9	160.9	60.8	139.4	71.1
Q8NBJ7	Inactive C-alpha-formylglycine-generating enzyme 2 OS=Homo sapiens OX=9606 GN=SUMF2 PE=1 SV=2	35	8	8	8	301	33.8	8	11.69	87.2	83.5	137.7	87.8	112.6	91.2
Q96T51	RUN and FYVE domain-containing protein 1 OS=Homo sapiens OX=9606 GN=RUFY1 PE=1 SV=2	15	10	11	10	708	79.8	5.74	8.19	99.7	87.6	113.4	89.4	119.8	90.2
O94901	SUN domain-containing protein 1 OS=Homo sapiens OX=9606 GN=SUN1 PE=1 SV=3	13	9	10	8	812	90	7.08	11.46	100.5	93.4	114.5	95	103.3	93.2
Q8IUD2	ELKS/Rab6-interacting/CAST family member 1 OS=Homo sapiens OX=9606 GN=ERC1 PE=1 SV=1	8	9	9	9	1116	128	5.97	8.41	108.8	98.2	109.1	90.4	104.1	89.4
P11717	Cation-independent mannose-6-phosphate receptor OS=Homo sapiens OX=9606 GN=IGF2R PE=1 SV=3	4	9	9	9	2491	274.2	5.94	10.1	118	94.6	98.3	95.2	103.5	90.4
P19878	Neutrophil cytosol factor 2 OS=Homo sapiens OX=9606 GN=NCF2 PE=1 SV=2	20	9	11	9	526	59.7	6.16	12.49	102.1	101.3	85.9	101.5	105.7	103.5
Q93034	Cullin-5 OS=Homo sapiens OX=9606 GN=CUL5 PE=1 SV=4	9	7	10	7	780	90.9	7.94	4.9	99.2	105.6	106.9	89.9	102.9	95.4
P62495	Eukaryotic peptide chain release factor subunit 1 OS=Homo sapiens OX=9606 GN=ETF1 PE=1 SV=3	12	5	10	5	437	49	5.71	14.01	92.5	80.9	126.9	82.7	133.2	83.8
P78406	mRNA export factor OS=Homo sapiens OX=9606 GN=RAE1 PE=1 SV=1	27	7	8	7	368	40.9	7.83	8.05	101.9	90	121.4	86.6	108.3	91.7
O00203	AP-3 complex subunit beta-1 OS=Homo sapiens OX=9606 GN=AP3B1 PE=1 SV=3	8	9	10	8	1094	121.2	6.04	12.07	108.2	85.8	109.3	86.3	124.5	85.9
Q9UKV8	Protein argonaute-2 OS=Homo sapiens OX=9606 GN=AGO2 PE=1 SV=3	14	10	10	7	859	97.1	9.19	6.37	97.6	104.3	95.7	107.5	95.9	99.1
P31153	S-adenosylmethionine synthase isoform type-2 OS=Homo sapiens OX=9606 GN=MAT2A PE=1 SV=1	21	8	12	8	395	43.6	6.48	18.19	95.4	83.2	116	84.6	126.1	94.7
Q9NVE7	4'-phosphopantetheine phosphatase OS=Homo sapiens OX=9606 GN=PANK4 PE=1 SV=1	11	7	7	7	773	85.9	6.28	13.2	135.7	120.6	79.5	96	81.1	87.2
P84243	Histone H3.3 OS=Homo sapiens OX=9606 GN=H3-3A PE=1 SV=2	32	7	47	2	136	15.3	11.27	70.96	99.9	93.7	112.7	86.7	116.4	90.5
P49821	NADH dehydrogenase [ubiquinone] flavoprotein 1, mitochondrial OS=Homo sapiens OX=9606 GN=NDUFV1 PE=1 SV=4	23	7	8	7	464	50.8	8.21	9.46	102.9	97	93.1	97.2	105.9	104
P26373	60S ribosomal protein L13 OS=Homo sapiens OX=9606 GN=RPL13 PE=1 SV=4	27	7	10	7	211	24.2	11.65	15.92	101.2	83	116.7	81.7	132.2	85.2
Q8NBF2	NHL repeat-containing protein 2 OS=Homo sapiens OX=9606 GN=NHLRC2 PE=1 SV=1	13	6	6	6	726	79.4	5.55	13.44	90.8	114	83.7	114.6	87.2	109.8
Q16630	Cleavage and polyadenylation specificity factor subunit 6 OS=Homo sapiens OX=9606 GN=CPSF6 PE=1 SV=2	14	7	10	7	551	59.2	7.15	11.44	99.8	86.3	116.2	83.9	116.8	97
O75937	DnaJ homolog subfamily C member 8 OS=Homo sapiens OX=9606 GN=DNAJC8 PE=1 SV=2	19	5	12	5	253	29.8	9.06	11.17	92.1	85.2	150.8	82.8	108.6	80.4
Q15165	Serum paraoxonase/arylesterase 2 OS=Homo sapiens OX=9606 GN=PON2 PE=1 SV=4	14	3	10	3	354	39.4	5.6	25.23	80.2	89.6	99.4	80.6	156.3	93.8
O14744	Protein arginine N-methyltransferase 5 OS=Homo sapiens OX=9606 GN=PRMT5 PE=1 SV=4	10	6	8	6	637	72.6	6.29	13.39	98.6	99.1	110.6	76.6	119.2	96
Q0ZGT2	Nexilin OS=Homo sapiens OX=9606 GN=NEXN PE=1 SV=1	9	8	9	8	675	80.6	5.33	14.93	100.6	109.6	93	110.3	87.4	99.1
P07451	Carbonic anhydrase 3 OS=Homo sapiens OX=9606 GN=CA3 PE=1 SV=3	39	7	7	7	260	29.5	7.34	11.29	90.5	108.3	75.9	117.1	84.8	123.4
P09543	2',3'-cyclic-nucleotide 3'-phosphodiesterase OS=Homo sapiens OX=9606 GN=CNP PE=1 SV=2	22	10	12	10	421	47.5	9.07	9.1	98	91.2	124.4	92.5	108.4	85.6
Q9BXS5	AP-1 complex subunit mu-1 OS=Homo sapiens OX=9606 GN=AP1M1 PE=1 SV=3	21	8	9	6	423	48.6	7.3	14.11	96.7	95.1	100.3	103.2	105.4	99.4
Q8IX12	Cell division cycle and apoptosis regulator protein 1 OS=Homo sapiens OX=9606 GN=CCAR1 PE=1 SV=2	10	10	11	10	1150	132.7	5.76	4.92	93.6	104.1	102.7	106	98.2	95.4
O00264	Membrane-associated progesterone receptor component 1 OS=Homo sapiens OX=9606 GN=PGRMC1 PE=1 SV=3	27	7	11	5	195	21.7	4.7	22.87	97.5	80.9	156.7	79	104.8	81.1
O43866	CD5 antigen-like OS=Homo sapiens OX=9606 GN=CD5L PE=1 SV=1	24	6	10	6	347	38.1	5.47	9.92	94.2	107.1	89.2	118.2	83.3	107.9
Q9UKU7	Isobutyryl-CoA dehydrogenase, mitochondrial OS=Homo sapiens OX=9606 GN=ACAD8 PE=1 SV=1	20	8	9	8	415	45	7.85	12.6	97.4	83.6	150.3	76.5	108.4	83.9
P61923	Coatomer subunit zeta-1 OS=Homo sapiens OX=9606 GN=COPZ1 PE=1 SV=1	25	4	8	4	177	20.2	4.81	18.17	93	84.3	114.9	81.6	138.2	87.9
Q641Q2	WASH complex subunit 2A OS=Homo sapiens OX=9606 GN=WASHC2A PE=1 SV=3	9	9	10	1	1341	147.1	4.81	5.68	104.9	94.1	100.1	101	112.2	87.6
O14579	Coatomer subunit epsilon OS=Homo sapiens OX=9606 GN=COPE PE=1 SV=3	26	6	7	6	308	34.5	5.12	8.73	98.6	81.4	109.5	89.4	130	91.1
Q9BVC6	Transmembrane protein 109 OS=Homo sapiens OX=9606 GN=TMEM109 PE=1 SV=1	13	4	11	4	243	26.2	10.48	18.36	90.8	89.2	99.4	101.3	131.3	88
Q969V3	Nicalin OS=Homo sapiens OX=9606 GN=NCLN PE=1 SV=2	15	7	8	7	563	62.9	6.89	10.79	93.8	91.8	97.9	94.4	124.7	97.4
O75489	NADH dehydrogenase [ubiquinone] iron-sulfur protein 3, mitochondrial OS=Homo sapiens OX=9606 GN=NDUFS3 PE=1 SV=1	26	5	11	5	264	30.2	7.5	16.26	95.9	99	97.6	102.1	105.8	99.7
Q63HR2	Tensin-2 OS=Homo sapiens OX=9606 GN=TNS2 PE=1 SV=2	8	9	9	7	1409	152.5	8.35	12.6	116.9	106.9	93.4	99	94.8	88.9
Q9UKK9	ADP-sugar pyrophosphatase OS=Homo sapiens OX=9606 GN=NUDT5 PE=1 SV=1	28	5	7	5	219	24.3	4.94	12.86	100.7	102.4	114	96.9	93.9	92.3
Q7Z2K6	Endoplasmic reticulum metallopeptidase 1 OS=Homo sapiens OX=9606 GN=ERMP1 PE=1 SV=2	9	8	8	8	904	100.2	7.52	9.05	109.7	107.2	91.1	100.5	93.6	98
P05090	Apolipoprotein D OS=Homo sapiens OX=9606 GN=APOD PE=1 SV=1	26	4	11	4	189	21.3	5.15	8.78	71.7	90.4	72.4	120.5	85.4	159.6
Q15286	Ras-related protein Rab-35 OS=Homo sapiens OX=9606 GN=RAB35 PE=1 SV=1	32	6	9	4	201	23	8.29	18.94	110.6	97.1	96.7	96.5	103.5	95.7
P20742	Pregnancy zone protein OS=Homo sapiens OX=9606 GN=PZP PE=1 SV=4	4	6	13	2	1482	163.8	6.38	23.95	66.6	74.1	89.6	178	76.1	115.5
Q9H845	Complex I assembly factor ACAD9, mitochondrial OS=Homo sapiens OX=9606 GN=ACAD9 PE=1 SV=1	17	8	9	8	621	68.7	7.96	11.08	100.9	81.7	97.9	91.1	114.5	113.9
P09758	Tumor-associated calcium signal transducer 2 OS=Homo sapiens OX=9606 GN=TACSTD2 PE=1 SV=3	25	5	7	5	323	35.7	8.87	13.33	112.9	110.1	92.6	93.9	92	98.6
P28676	Grancalcin OS=Homo sapiens OX=9606 GN=GCA PE=1 SV=2	30	5	8	5	217	24	5.21	12.55	105.6	109.4	94.9	94.3	91.6	104.2
Q9BRF8	Serine/threonine-protein phosphatase CPPED1 OS=Homo sapiens OX=9606 GN=CPPED1 PE=1 SV=3	21	6	8	6	314	35.5	6.2	20.26	100.5	97.1	91.3	105.7	98.9	106.5
P49720	Proteasome subunit beta type-3 OS=Homo sapiens OX=9606 GN=PSMB3 PE=1 SV=2	31	5	7	5	205	22.9	6.55	13.92	96.5	95.6	102.5	99.2	99.7	106.6
O14776	Transcription elongation regulator 1 OS=Homo sapiens OX=9606 GN=TCERG1 PE=1 SV=2	9	9	10	9	1098	123.8	8.65	6.08	95.2	107.4	106	95.6	97.7	98.1
O75923	Dysferlin OS=Homo sapiens OX=9606 GN=DYSF PE=1 SV=1	4	7	9	6	2080	237.1	5.64	10.77	114.7	126.9	71.2	106.1	75.8	105.3
Q15363	Transmembrane emp24 domain-containing protein 2 OS=Homo sapiens OX=9606 GN=TMED2 PE=1 SV=1	32	6	9	6	201	22.7	5.17	14.12	91.8	68	122.6	76.5	167.4	73.6
Q53FA7	Quinone oxidoreductase PIG3 OS=Homo sapiens OX=9606 GN=TP53I3 PE=1 SV=2	17	5	9	5	332	35.5	7.17	17.89	95.2	84	110.8	80.7	153.6	75.7
Q96DG6	Carboxymethylenebutenolidase homolog OS=Homo sapiens OX=9606 GN=CMBL PE=1 SV=1	20	5	10	5	245	28	7.18	10.78	78.1	76.5	229.3	74.9	63.2	78.1
O00148	ATP-dependent RNA helicase DDX39A OS=Homo sapiens OX=9606 GN=DDX39A PE=1 SV=2	14	7	14	1	427	49.1	5.68	18.17	87.6	100.1	112.5	103	101.6	95.1
Q08AM6	Protein VAC14 homolog OS=Homo sapiens OX=9606 GN=VAC14 PE=1 SV=1	12	8	9	8	782	87.9	6.13	12.59	93.6	101.4	98.4	109.5	91.9	105.2
Q08945	FACT complex subunit SSRP1 OS=Homo sapiens OX=9606 GN=SSRP1 PE=1 SV=1	12	7	8	7	709	81	6.87	16.52	96	84	140.5	87.3	104.1	88.1
P98082	Disabled homolog 2 OS=Homo sapiens OX=9606 GN=DAB2 PE=1 SV=3	12	7	8	7	770	82.4	5.53	9.21	111.1	95.3	100.1	94.5	99.7	99.4
P19838	Nuclear factor NF-kappa-B p105 subunit OS=Homo sapiens OX=9606 GN=NFKB1 PE=1 SV=2	12	8	8	8	968	105.3	5.4	7.46	100	95.1	124	89.7	105.2	86.1
P24666	Low molecular weight phosphotyrosine protein phosphatase OS=Homo sapiens OX=9606 GN=ACP1 PE=1 SV=3	32	4	6	4	158	18	6.74	13.77	101.9	111.3	84	104.8	93.2	104.8
Q16695	Histone H3.1t OS=Homo sapiens OX=9606 GN=HIST3H3 PE=1 SV=3	32	7	47	2	136	15.5	11.12	69.82	106.8	92	132.8	79.4	102.6	86.3
P02794	Ferritin heavy chain OS=Homo sapiens OX=9606 GN=FTH1 PE=1 SV=2	44	6	9	6	183	21.2	5.55	13.6	64.6	52	131.5	113.1	135.4	103.3
P13686	Tartrate-resistant acid phosphatase type 5 OS=Homo sapiens OX=9606 GN=ACP5 PE=1 SV=3	16	3	5	3	325	36.6	8.7	11.88	93.3	98	88.9	129	82.3	108.4
P60866	40S ribosomal protein S20 OS=Homo sapiens OX=9606 GN=RPS20 PE=1 SV=1	30	4	13	4	119	13.4	9.94	20.65	101.2	80	124.6	79.4	127.1	87.7
Q9Y376	Calcium-binding protein 39 OS=Homo sapiens OX=9606 GN=CAB39 PE=1 SV=1	21	7	7	6	341	39.8	6.89	14.16	104.1	96.7	112.6	89.9	107.1	89.7
Q96P48	Arf-GAP with Rho-GAP domain, ANK repeat and PH domain-containing protein 1 OS=Homo sapiens OX=9606 GN=ARAP1 PE=1 SV=3	8	9	9	9	1450	162.1	6.23	10.02	98.5	98.4	101.8	111	90.6	99.7
O94906	Pre-mRNA-processing factor 6 OS=Homo sapiens OX=9606 GN=PRPF6 PE=1 SV=1	8	8	8	8	941	106.9	8.25	15.05	93.6	87.3	127.4	85.9	122.9	82.9
P49773	Histidine triad nucleotide-binding protein 1 OS=Homo sapiens OX=9606 GN=HINT1 PE=1 SV=2	40	5	10	5	126	13.8	6.95	20.42	96.9	99.5	121.6	97.9	92.1	92
Q9BY44	Eukaryotic translation initiation factor 2A OS=Homo sapiens OX=9606 GN=EIF2A PE=1 SV=3	16	7	7	7	585	64.9	8.87	10.67	96.7	102.3	110.5	86.1	116.4	88
Q9BX68	Histidine triad nucleotide-binding protein 2, mitochondrial OS=Homo sapiens OX=9606 GN=HINT2 PE=1 SV=1	29	4	6	4	163	17.2	9.16	13.39	101.3	84	136.2	80.1	119.6	78.7
Q9NRW1	Ras-related protein Rab-6B OS=Homo sapiens OX=9606 GN=RAB6B PE=1 SV=1	23	5	11	1	208	23.4	5.53	9.11	90.1	84.2	90.5	108.2	100	127
Q96NY7	Chloride intracellular channel protein 6 OS=Homo sapiens OX=9606 GN=CLIC6 PE=2 SV=3	13	5	7	4	704	73	4.37	8.38	105.5	92.9	71.6	65.7	172.5	91.8
P67809	Y-box-binding protein 1 OS=Homo sapiens OX=9606 GN=YBX1 PE=1 SV=3	29	5	6	4	324	35.9	9.88	7.46	91.1	132.5	100.6	94.9	98.9	82
P06703	Protein S100-A6 OS=Homo sapiens OX=9606 GN=S100A6 PE=1 SV=1	67	6	110	6	90	10.2	5.48	70.49	112.9	95.8	109.8	79.6	121.3	80.5
P50897	Palmitoyl-protein thioesterase 1 OS=Homo sapiens OX=9606 GN=PPT1 PE=1 SV=1	20	6	10	6	306	34.2	6.52	9.79	96.3	86.8	143.1	82.8	105	86
P00492	Hypoxanthine-guanine phosphoribosyltransferase OS=Homo sapiens OX=9606 GN=HPRT1 PE=1 SV=2	24	4	7	4	218	24.6	6.68	12.83	73.2	103.9	114.1	116	79.7	113
Q9UBS4	DnaJ homolog subfamily B member 11 OS=Homo sapiens OX=9606 GN=DNAJB11 PE=1 SV=1	20	6	9	6	358	40.5	6.18	8.23	94.4	92.1	116.1	92.7	121.9	82.7
P63151	Serine/threonine-protein phosphatase 2A 55 kDa regulatory subunit B alpha isoform OS=Homo sapiens OX=9606 GN=PPP2R2A PE=1 SV=1	20	8	11	6	447	51.7	6.2	10.04	99.7	96.9	119.9	89.6	107.2	86.6
Q96QR8	Transcriptional activator protein Pur-beta OS=Homo sapiens OX=9606 GN=PURB PE=1 SV=3	21	4	5	4	312	33.2	5.43	9.58	96.6	91.9	123	82	131.6	74.9
O95479	GDH/6PGL endoplasmic bifunctional protein OS=Homo sapiens OX=9606 GN=H6PD PE=1 SV=2	7	6	7	6	791	88.8	7.3	12.12	98.7	66.3	165.1	72.7	126	71.3
P28289	Tropomodulin-1 OS=Homo sapiens OX=9606 GN=TMOD1 PE=1 SV=1	19	6	9	5	359	40.5	5.1	14.15	86.8	111.4	81.6	122.3	81.3	116.6
Q96B97	SH3 domain-containing kinase-binding protein 1 OS=Homo sapiens OX=9606 GN=SH3KBP1 PE=1 SV=2	12	7	7	7	665	73.1	6.62	12.15	114.2	100.6	107.9	101.6	82.2	93.4
Q7Z4W1	L-xylulose reductase OS=Homo sapiens OX=9606 GN=DCXR PE=1 SV=2	34	6	7	6	244	25.9	8.1	12.64	100.9	94.6	118.2	96.6	95	94.6
P46926	Glucosamine-6-phosphate isomerase 1 OS=Homo sapiens OX=9606 GN=GNPDA1 PE=1 SV=1	28	7	9	5	289	32.6	6.92	12.36	87.7	82.8	129.7	98	114.5	87.3
Q9NWV4	CXXC motif containing zinc binding protein OS=Homo sapiens OX=9606 GN=CZIB PE=1 SV=1	36	5	10	5	160	18	5.01	18.77	100.3	91.4	108.7	95.4	109.9	94.4
P61020	Ras-related protein Rab-5B OS=Homo sapiens OX=9606 GN=RAB5B PE=1 SV=1	34	6	9	4	215	23.7	8.13	7.27	109.4	106.7	80.9	107.7	94.3	101
Q9GZP4	PITH domain-containing protein 1 OS=Homo sapiens OX=9606 GN=PITHD1 PE=1 SV=1	24	4	6	4	211	24.2	5.74	9.37	88	106.2	111	113.2	78.3	103.3
Q9Y3E1	Hepatoma-derived growth factor-related protein 3 OS=Homo sapiens OX=9606 GN=HDGFL3 PE=1 SV=1	24	5	10	4	203	22.6	7.99	11.6	111.9	119.6	87.9	103.7	80.9	96
P61764	Syntaxin-binding protein 1 OS=Homo sapiens OX=9606 GN=STXBP1 PE=1 SV=1	15	8	9	7	594	67.5	6.96	7.6	125.4	104.2	78.3	112.6	97.2	82.3
O60568	Multifunctional procollagen lysine hydroxylase and glycosyltransferase LH3 OS=Homo sapiens OX=9606 GN=PLOD3 PE=1 SV=1	11	7	9	7	738	84.7	6.05	13.32	97.8	81.4	119.1	89	119.5	93.2
Q8NBQ5	Estradiol 17-beta-dehydrogenase 11 OS=Homo sapiens OX=9606 GN=HSD17B11 PE=1 SV=3	23	6	8	6	300	32.9	9.07	13.01	121.1	113.4	74	102.1	87.6	101.8
P46108	Adapter molecule crk OS=Homo sapiens OX=9606 GN=CRK PE=1 SV=2	24	6	6	6	304	33.8	5.55	8.88	117.2	103.9	84.1	98.6	105.2	91
Q92614	Unconventional myosin-XVIIIa OS=Homo sapiens OX=9606 GN=MYO18A PE=1 SV=3	4	7	7	7	2054	233	6.3	7.97	102.1	102.7	103.8	103	90.6	97.8
P51153	Ras-related protein Rab-13 OS=Homo sapiens OX=9606 GN=RAB13 PE=1 SV=1	23	5	12	2	203	22.8	9.19	23.37	105.5	82.2	115.9	83.3	124.1	89
P09417	Dihydropteridine reductase OS=Homo sapiens OX=9606 GN=QDPR PE=1 SV=2	23	4	7	4	244	25.8	7.37	17.71	98.2	106.8	94.3	104.5	101.5	94.7
P55010	Eukaryotic translation initiation factor 5 OS=Homo sapiens OX=9606 GN=EIF5 PE=1 SV=2	20	8	8	8	431	49.2	5.58	8.43	78.8	73.2	101.3	76.5	163.7	106.6
Q5T1M5	FK506-binding protein 15 OS=Homo sapiens OX=9606 GN=FKBP15 PE=1 SV=2	7	7	8	7	1219	133.5	5.2	10.9	105.7	90.6	109.2	94.4	107.6	92.4
O96000	NADH dehydrogenase [ubiquinone] 1 beta subcomplex subunit 10 OS=Homo sapiens OX=9606 GN=NDUFB10 PE=1 SV=3	35	5	9	5	172	20.8	8.48	5.49	91.4	91.5	117	84.5	124.1	91.6
Q5VT66	Mitochondrial amidoxime-reducing component 1 OS=Homo sapiens OX=9606 GN=MARC1 PE=1 SV=1	18	5	5	4	337	37.5	8.88	10.37	83.2	96.9	150.6	84.9	93.8	90.6
P17900	Ganglioside GM2 activator OS=Homo sapiens OX=9606 GN=GM2A PE=1 SV=4	23	5	10	5	193	20.8	5.31	14.27	89.6	77.5	139.4	95	122.5	76
P14324	Farnesyl pyrophosphate synthase OS=Homo sapiens OX=9606 GN=FDPS PE=1 SV=4	15	6	10	6	419	48.2	6.15	15.1	98.8	90.6	120.2	82.2	128.2	80
P14854	Cytochrome c oxidase subunit 6B1 OS=Homo sapiens OX=9606 GN=COX6B1 PE=1 SV=2	76	6	12	6	86	10.2	7.05	13.38	108.4	98	122.3	85.9	99.1	86.4
O43493	Trans-Golgi network integral membrane protein 2 OS=Homo sapiens OX=9606 GN=TGOLN2 PE=1 SV=4	17	7	10	7	437	45.9	5.63	13.16	103.9	74.7	112.6	70.9	149.1	88.8
Q9Y394	Dehydrogenase/reductase SDR family member 7 OS=Homo sapiens OX=9606 GN=DHRS7 PE=1 SV=1	9	3	6	3	339	38.3	8.32	15.43	75.7	90.4	96.5	112.8	117.5	107.1
P32969	60S ribosomal protein L9 OS=Homo sapiens OX=9606 GN=RPL9 PE=1 SV=1	26	5	9	5	192	21.9	9.95	15.2	97.4	84.7	114.5	83.8	135.4	84.3
O14578	Citron Rho-interacting kinase OS=Homo sapiens OX=9606 GN=CIT PE=1 SV=2	4	8	8	8	2027	231.3	6.57	14.37	77.6	70.4	145.2	72.7	167.8	66.3
P50914	60S ribosomal protein L14 OS=Homo sapiens OX=9606 GN=RPL14 PE=1 SV=4	22	5	11	5	215	23.4	10.93	22.05	91.4	86.3	114.3	94	124.6	89.3
P30520	Adenylosuccinate synthetase isozyme 2 OS=Homo sapiens OX=9606 GN=ADSS2 PE=1 SV=3	16	7	9	7	456	50.1	6.55	10.92	105.1	92.8	102.6	90.9	117.3	91.4
Q9Y4E1	WASH complex subunit 2C OS=Homo sapiens OX=9606 GN=WASHC2C PE=1 SV=4	8	9	9	1	1320	144.8	4.79	7.69	103.9	102.4	88.6	100.3	100.8	104
Q92835	Phosphatidylinositol 3,4,5-trisphosphate 5-phosphatase 1 OS=Homo sapiens OX=9606 GN=INPP5D PE=1 SV=2	10	9	9	9	1189	133.2	7.59	5.41	98.1	79.5	134.2	93.5	104.4	90.3
P29536	Leiomodin-1 OS=Homo sapiens OX=9606 GN=LMOD1 PE=1 SV=3	14	8	10	8	600	67	9.33	14.54	123.7	118.2	78.5	110.1	72.8	96.8
P06132	Uroporphyrinogen decarboxylase OS=Homo sapiens OX=9606 GN=UROD PE=1 SV=2	25	6	7	6	367	40.8	6.14	8.99	84.4	104.3	96.8	114.7	86.1	113.8
Q6UXI9	Nephronectin OS=Homo sapiens OX=9606 GN=NPNT PE=2 SV=3	10	5	6	5	565	61.9	8.34	12.43	144.5	110.6	82.8	101.8	65.7	94.6
Q8TAT6	Nuclear protein localization protein 4 homolog OS=Homo sapiens OX=9606 GN=NPLOC4 PE=1 SV=3	10	5	6	5	608	68.1	6.38	14.71	97.3	99.5	111.4	93.8	109.4	88.6
Q16270	Insulin-like growth factor-binding protein 7 OS=Homo sapiens OX=9606 GN=IGFBP7 PE=1 SV=1	24	4	5	4	282	29.1	7.9	11.82	107.5	97.6	103.7	77.9	124.6	88.6
Q9UBQ0	Vacuolar protein sorting-associated protein 29 OS=Homo sapiens OX=9606 GN=VPS29 PE=1 SV=1	21	4	7	4	182	20.5	6.79	18.14	108.8	94.1	107.3	90.2	109.4	90.2
O14879	Interferon-induced protein with tetratricopeptide repeats 3 OS=Homo sapiens OX=9606 GN=IFIT3 PE=1 SV=1	20	8	9	8	490	56	5.2	7.13	95.9	98.4	108.8	124.5	88.4	84
Q9UKG1	DCC-interacting protein 13-alpha OS=Homo sapiens OX=9606 GN=APPL1 PE=1 SV=1	15	8	8	8	709	79.6	5.41	13.25	112.2	107.8	94.4	100.8	93.1	91.7
P55145	Mesencephalic astrocyte-derived neurotrophic factor OS=Homo sapiens OX=9606 GN=MANF PE=1 SV=3	30	5	8	5	182	20.7	8.69	12.77	95.7	83.6	110	93.5	116.9	100.2
P08473	Neprilysin OS=Homo sapiens OX=9606 GN=MME PE=1 SV=2	9	7	8	7	750	85.5	5.73	9.76	125.4	131.6	61.2	111	65.5	105.2
O95716	Ras-related protein Rab-3D OS=Homo sapiens OX=9606 GN=RAB3D PE=1 SV=1	25	7	9	5	219	24.3	4.93	13.93	99.5	98.3	87.2	88.1	141.7	85.3
Q16625	Occludin OS=Homo sapiens OX=9606 GN=OCLN PE=1 SV=1	14	6	10	6	522	59.1	6.09	13.97	100.9	101.6	124	88	99.9	85.6
Q12768	WASH complex subunit 5 OS=Homo sapiens OX=9606 GN=WASHC5 PE=1 SV=1	7	7	8	7	1159	134.2	6.98	6.48	102.3	100.9	92.9	103.5	106.3	94.1
Q14241	Elongin-A OS=Homo sapiens OX=9606 GN=ELOA PE=1 SV=2	9	7	8	7	798	89.9	9.57	11.75	91.6	81.9	161.9	81.2	110.8	72.6
P62244	40S ribosomal protein S15a OS=Homo sapiens OX=9606 GN=RPS15A PE=1 SV=2	28	4	9	4	130	14.8	10.13	21.32	99.6	80.2	115.3	85.4	130.7	88.8
Q9UQ35	Serine/arginine repetitive matrix protein 2 OS=Homo sapiens OX=9606 GN=SRRM2 PE=1 SV=2	4	8	9	8	2752	299.4	12.06	5.18	95.2	85.8	133.4	84.6	113	88
P17096	High mobility group protein HMG-I/HMG-Y OS=Homo sapiens OX=9606 GN=HMGA1 PE=1 SV=3	49	4	9	4	107	11.7	10.32	18.21	103.6	75.9	141.8	71.8	125.9	80.9
P02656	Apolipoprotein C-III OS=Homo sapiens OX=9606 GN=APOC3 PE=1 SV=1	34	3	7	3	99	10.8	5.41	16.63	89.6	159.9	53.2	119.6	49.7	127.9
Q9Y520	Protein PRRC2C OS=Homo sapiens OX=9606 GN=PRRC2C PE=1 SV=4	3	9	9	8	2896	316.7	9.13	5.01	103	85	120.3	86.3	122.1	83.4
Q92973	Transportin-1 OS=Homo sapiens OX=9606 GN=TNPO1 PE=1 SV=2	9	7	9	5	898	102.3	4.98	6.7	95.3	94.2	108.3	102.1	106.5	93.6
Q9H2M9	Rab3 GTPase-activating protein non-catalytic subunit OS=Homo sapiens OX=9606 GN=RAB3GAP2 PE=1 SV=1	7	8	9	8	1393	155.9	5.62	7.45	95.4	87.4	110.1	90.7	126.2	90.3
Q92621	Nuclear pore complex protein Nup205 OS=Homo sapiens OX=9606 GN=NUP205 PE=1 SV=3	4	8	10	8	2012	227.8	6.19	10.17	90.5	104.8	108.4	95.8	106.2	94.3
Q9UIA9	Exportin-7 OS=Homo sapiens OX=9606 GN=XPO7 PE=1 SV=3	7	6	9	6	1087	123.8	6.32	10.47	103.1	101.5	98.6	96.9	104.8	95.2
Q9UBX5	Fibulin-5 OS=Homo sapiens OX=9606 GN=FBLN5 PE=1 SV=1	11	5	7	5	448	50.1	4.73	15.02	102.7	84.9	99.5	91.8	98.4	122.7
Q96CM8	Medium-chain acyl-CoA ligase ACSF2, mitochondrial OS=Homo sapiens OX=9606 GN=ACSF2 PE=1 SV=2	14	6	6	6	615	68.1	7.55	12.86	88.6	85	168.9	80.7	97	79.7
Q969Z3	Mitochondrial amidoxime reducing component 2 OS=Homo sapiens OX=9606 GN=MARC2 PE=1 SV=1	16	5	5	4	335	38	9.16	8.09	110.7	90.5	141.4	87.4	91.2	78.8
Q9H3S7	Tyrosine-protein phosphatase non-receptor type 23 OS=Homo sapiens OX=9606 GN=PTPN23 PE=1 SV=1	7	10	11	10	1636	178.9	6.92	11.26	94.8	82.3	115.5	89.2	124.9	93.3
Q27J81	Inverted formin-2 OS=Homo sapiens OX=9606 GN=INF2 PE=1 SV=2	6	8	9	7	1249	135.5	5.38	6.17	127.8	89.8	93.9	106.7	87.3	94.5
O00330	Pyruvate dehydrogenase protein X component, mitochondrial OS=Homo sapiens OX=9606 GN=PDHX PE=1 SV=3	13	6	9	6	501	54.1	8.66	7.93	106.8	94.8	124.2	92.7	99.6	82
O00303	Eukaryotic translation initiation factor 3 subunit F OS=Homo sapiens OX=9606 GN=EIF3F PE=1 SV=1	19	6	6	6	357	37.5	5.45	11.57	102.2	97.3	110.8	94.1	102.5	93.2
Q92747	Actin-related protein 2/3 complex subunit 1A OS=Homo sapiens OX=9606 GN=ARPC1A PE=2 SV=2	19	6	6	5	370	41.5	8.18	13.07	110.1	109.5	124	88.8	81.6	86
P42331	Rho GTPase-activating protein 25 OS=Homo sapiens OX=9606 GN=ARHGAP25 PE=1 SV=2	11	7	10	7	645	73.4	6.37	11.13	102.1	105.2	89.9	103.9	100.8	98
Q9Y624	Junctional adhesion molecule A OS=Homo sapiens OX=9606 GN=F11R PE=1 SV=1	28	7	10	7	299	32.6	7.9	12.02	106.7	102.4	106.7	93.8	111.3	79
P43405	Tyrosine-protein kinase SYK OS=Homo sapiens OX=9606 GN=SYK PE=1 SV=1	11	6	7	5	635	72	8.25	9.9	113.2	89.6	93.9	94.2	112	97.1
P02461	Collagen alpha-1(III) chain OS=Homo sapiens OX=9606 GN=COL3A1 PE=1 SV=4	4	5	15	5	1466	138.5	6.61	19	121.8	94.5	48.8	89.1	70.2	175.6
P37059	Estradiol 17-beta-dehydrogenase 2 OS=Homo sapiens OX=9606 GN=HSD17B2 PE=1 SV=1	16	4	6	4	387	42.8	8.5	12.27	53	63.9	67.4	63.3	293.8	58.6
Q5JRA6	Transport and Golgi organization protein 1 homolog OS=Homo sapiens OX=9606 GN=MIA3 PE=1 SV=1	6	9	10	9	1907	213.6	4.84	3.41	93.6	92	116.3	96.8	113.2	88.1
Q5K4L6	Solute carrier family 27 member 3 OS=Homo sapiens OX=9606 GN=SLC27A3 PE=2 SV=4	8	3	5	3	683	73.5	7.09	11.62	86.3	96.5	100.1	110.8	95	111.3
Q9UHD9	Ubiquilin-2 OS=Homo sapiens OX=9606 GN=UBQLN2 PE=1 SV=2	7	3	4	1	624	65.7	5.22	12.33	92.6	94.2	123.8	84.5	106.9	98
P63220	40S ribosomal protein S21 OS=Homo sapiens OX=9606 GN=RPS21 PE=1 SV=1	48	4	7	4	83	9.1	8.5	15.15	104.6	83.2	117.1	81.4	126.6	87.1
Q9UMX5	Neudesin OS=Homo sapiens OX=9606 GN=NENF PE=1 SV=1	32	5	9	5	172	18.8	5.69	14.75	84.7	84.1	132.8	89.7	128.9	79.8
P17480	Nucleolar transcription factor 1 OS=Homo sapiens OX=9606 GN=UBTF PE=1 SV=1	12	8	9	8	764	89.4	5.81	4.02	94.5	96.7	117.8	98.9	104.3	87.8
Q9H9G7	Protein argonaute-3 OS=Homo sapiens OX=9606 GN=AGO3 PE=1 SV=2	8	6	7	1	860	97.3	9.11	14.71	87.6	97	123.2	84.7	107.6	99.9
P49207	60S ribosomal protein L34 OS=Homo sapiens OX=9606 GN=RPL34 PE=1 SV=3	36	5	11	5	117	13.3	11.47	21.59	118.8	69.2	130.9	70.4	130.5	80.2
Q9Y6K5	2'-5'-oligoadenylate synthase 3 OS=Homo sapiens OX=9606 GN=OAS3 PE=1 SV=3	9	7	8	7	1087	121.1	8.4	5.26	96.6	92.6	124.5	132.3	66.2	87.7
O43290	U4/U6.U5 tri-snRNP-associated protein 1 OS=Homo sapiens OX=9606 GN=SART1 PE=1 SV=1	9	6	8	6	800	90.2	6.13	13.91	99.5	85.4	112.2	93.5	119.2	90.2
P05165	Propionyl-CoA carboxylase alpha chain, mitochondrial OS=Homo sapiens OX=9606 GN=PCCA PE=1 SV=4	9	6	8	6	728	80	7.52	11.79	94	83	158.1	84.6	93.2	87.2
Q96AB3	Isochorismatase domain-containing protein 2 OS=Homo sapiens OX=9606 GN=ISOC2 PE=1 SV=1	34	3	5	3	205	22.3	7.77	9.47	95.2	96.2	124.2	95.6	101.2	87.6
Q06124	Tyrosine-protein phosphatase non-receptor type 11 OS=Homo sapiens OX=9606 GN=PTPN11 PE=1 SV=3	14	7	7	7	593	68	7.3	12.95	100.9	112.8	92.6	104.6	89.9	99.2
Q13488	V-type proton ATPase 116 kDa subunit a isoform 3 OS=Homo sapiens OX=9606 GN=TCIRG1 PE=1 SV=3	8	7	7	7	830	92.9	7.12	13.72	102.4	99.2	100.9	97.8	109.6	90.1
Q8N9N7	Leucine-rich repeat-containing protein 57 OS=Homo sapiens OX=9606 GN=LRRC57 PE=1 SV=1	27	6	9	6	239	26.7	8.43	4.17	108	113.2	94.3	107.2	82.9	94.3
Q14376	UDP-glucose 4-epimerase OS=Homo sapiens OX=9606 GN=GALE PE=1 SV=2	19	6	7	6	348	38.3	6.73	15.19	85.5	70.8	149.9	72.5	142.3	79
Q14978	Nucleolar and coiled-body phosphoprotein 1 OS=Homo sapiens OX=9606 GN=NOLC1 PE=1 SV=2	11	8	8	8	699	73.6	9.47	11.31	106.7	78.3	126	75.7	124.7	88.6
Q15555	Microtubule-associated protein RP/EB family member 2 OS=Homo sapiens OX=9606 GN=MAPRE2 PE=1 SV=1	25	6	8	4	327	37	5.57	11.61	107.1	105.5	95.9	100.5	91.6	99.2
Q9Y371	Endophilin-B1 OS=Homo sapiens OX=9606 GN=SH3GLB1 PE=1 SV=1	20	7	8	6	365	40.8	6.04	11.31	110.6	98.1	109.4	95.1	91.3	95.5
Q9NZD4	Alpha-hemoglobin-stabilizing protein OS=Homo sapiens OX=9606 GN=AHSP PE=1 SV=1	35	4	7	4	102	11.8	5	15.74	93.8	145.2	60.8	113.2	61.4	125.6
Q13586	Stromal interaction molecule 1 OS=Homo sapiens OX=9606 GN=STIM1 PE=1 SV=3	13	7	8	7	685	77.4	6.67	12.46	108.4	112.1	89.5	102.7	92.7	94.7
O95786	Antiviral innate immune response receptor RIG-I OS=Homo sapiens OX=9606 GN=DDX58 PE=1 SV=2	10	9	9	9	925	106.5	6.4	8.83	102.6	98.2	106.9	101	95.9	95.5
Q15717	ELAV-like protein 1 OS=Homo sapiens OX=9606 GN=ELAVL1 PE=1 SV=2	16	5	8	5	326	36.1	9.17	14.49	92.9	86	117.4	85.9	127.8	90.1
P30566	Adenylosuccinate lyase OS=Homo sapiens OX=9606 GN=ADSL PE=1 SV=2	20	9	9	9	484	54.9	7.11	7	93	101.6	115.9	100.5	92.3	96.7
O00423	Echinoderm microtubule-associated protein-like 1 OS=Homo sapiens OX=9606 GN=EML1 PE=1 SV=3	10	7	7	7	815	89.8	7.06	10.32	107.4	127.3	71.1	118.5	76.4	99.3
P00740	Coagulation factor IX OS=Homo sapiens OX=9606 GN=F9 PE=1 SV=2	18	6	6	6	461	51.7	5.47	12.41	112.8	103.4	99.9	98.5	87.3	98.1
P05543	Thyroxine-binding globulin OS=Homo sapiens OX=9606 GN=SERPINA7 PE=1 SV=2	23	6	8	6	415	46.3	6.3	9.49	94	104.1	81.5	105.6	95.8	118.9
P02654	Apolipoprotein C-I OS=Homo sapiens OX=9606 GN=APOC1 PE=1 SV=1	35	5	10	5	83	9.3	8.47	15.59	55.3	105	56.8	137.6	61.7	183.6
Q53H12	Acylglycerol kinase, mitochondrial OS=Homo sapiens OX=9606 GN=AGK PE=1 SV=2	15	5	6	5	422	47.1	8.09	8.2	82.5	93	116.3	93.2	121.9	93.1
Q9Y512	Sorting and assembly machinery component 50 homolog OS=Homo sapiens OX=9606 GN=SAMM50 PE=1 SV=3	16	6	9	6	469	51.9	6.9	9.65	102.3	89.9	120.9	85.9	112.5	88.4
P19474	E3 ubiquitin-protein ligase TRIM21 OS=Homo sapiens OX=9606 GN=TRIM21 PE=1 SV=1	16	8	8	8	475	54.1	6.38	11.29	103.1	95.3	104.3	99.8	103.3	94.2
P08697	Alpha-2-antiplasmin OS=Homo sapiens OX=9606 GN=SERPINF2 PE=1 SV=3	12	6	7	6	491	54.5	6.29	12.91	77.6	128.1	61.3	133.8	60.3	138.9
P30838	Aldehyde dehydrogenase, dimeric NADP-preferring OS=Homo sapiens OX=9606 GN=ALDH3A1 PE=1 SV=3	15	6	7	5	453	50.4	6.54	6.4	92.1	128.9	166.3	80.3	57.6	74.8
Q96I24	Far upstream element-binding protein 3 OS=Homo sapiens OX=9606 GN=FUBP3 PE=1 SV=2	20	9	11	7	572	61.6	8.38	10.58	97.8	64.2	105.8	72.8	174.2	85.3
Q9NPY3	Complement component C1q receptor OS=Homo sapiens OX=9606 GN=CD93 PE=1 SV=3	9	5	5	5	652	68.5	5.44	10.16	143.6	131.7	58.1	107.9	61.4	97.3
Q969G5	Caveolae-associated protein 3 OS=Homo sapiens OX=9606 GN=CAVIN3 PE=1 SV=3	16	4	11	4	261	27.7	6.43	20.36	134.3	115.4	72.3	104.7	77	96.3
Q96S66	Chloride channel CLIC-like protein 1 OS=Homo sapiens OX=9606 GN=CLCC1 PE=1 SV=1	16	6	9	6	551	62	5.55	4.98	100.3	79.6	127.3	84.2	133.1	75.6
Q9NZN5	Rho guanine nucleotide exchange factor 12 OS=Homo sapiens OX=9606 GN=ARHGEF12 PE=1 SV=1	7	9	9	9	1544	173.1	5.74	2.62	92.8	105.5	112.5	92.7	102.1	94.5
Q9NPH2	Inositol-3-phosphate synthase 1 OS=Homo sapiens OX=9606 GN=ISYNA1 PE=1 SV=1	11	6	7	6	558	61	5.76	14.8	110.4	106.2	113.6	85.2	104.9	79.7
Q14696	LRP chaperone MESD OS=Homo sapiens OX=9606 GN=MESD PE=1 SV=2	21	4	7	4	234	26.1	7.78	9.51	99	93	111.8	94.4	116.2	85.6
Q13564	NEDD8-activating enzyme E1 regulatory subunit OS=Homo sapiens OX=9606 GN=NAE1 PE=1 SV=1	13	5	7	5	534	60.2	5.4	8.97	96.9	95.5	124.8	93.5	100.9	88.5
P09488	Glutathione S-transferase Mu 1 OS=Homo sapiens OX=9606 GN=GSTM1 PE=1 SV=3	26	6	11	2	218	25.7	6.7	12.19	71.1	67.8	47.3	61.4	196.7	155.7
O95436	Sodium-dependent phosphate transport protein 2B OS=Homo sapiens OX=9606 GN=SLC34A2 PE=1 SV=3	8	5	12	5	690	75.7	8.15	13.69	83.3	76.8	111.9	70.5	179.1	78.4
P22352	Glutathione peroxidase 3 OS=Homo sapiens OX=9606 GN=GPX3 PE=1 SV=2	18	4	7	4	226	25.5	8.13	15.91	96.7	99.3	92.7	87.7	117.3	106.3
P61353	60S ribosomal protein L27 OS=Homo sapiens OX=9606 GN=RPL27 PE=1 SV=2	35	5	13	5	136	15.8	10.56	8.28	110.2	79.8	110.8	90.3	122.5	86.3
O15347	High mobility group protein B3 OS=Homo sapiens OX=9606 GN=HMGB3 PE=1 SV=4	21	4	6	4	200	23	8.37	12.24	85.5	82.4	175	79.2	69.3	108.6
O60869	Endothelial differentiation-related factor 1 OS=Homo sapiens OX=9606 GN=EDF1 PE=1 SV=1	46	7	8	7	148	16.4	9.95	13.45	104.6	92.6	136.9	78.9	107.6	79.3
P21695	Glycerol-3-phosphate dehydrogenase [NAD(+)], cytoplasmic OS=Homo sapiens OX=9606 GN=GPD1 PE=1 SV=4	20	6	7	5	349	37.5	6.18	14.23	119.3	99	67.6	100.4	100.4	113.3
P16989	Y-box-binding protein 3 OS=Homo sapiens OX=9606 GN=YBX3 PE=1 SV=4	15	3	6	2	372	40.1	9.77	9.88	104.7	95.1	91.8	104.8	101.3	102.4
P11686	Pulmonary surfactant-associated protein C OS=Homo sapiens OX=9606 GN=SFTPC PE=1 SV=2	18	3	9	3	197	21	6.65	12.22	115.4	127.3	86.9	115.4	53.6	101.3
P30046	D-dopachrome decarboxylase OS=Homo sapiens OX=9606 GN=DDT PE=1 SV=3	38	4	10	4	118	12.7	7.3	13.44	90.4	109.4	109.4	111.7	82	97.2
Q6NY19	KN motif and ankyrin repeat domain-containing protein 3 OS=Homo sapiens OX=9606 GN=KANK3 PE=1 SV=1	8	6	9	6	840	88.4	5.26	13.21	125.2	132.3	66.2	107.8	67	101.6
Q53SF7	Cordon-bleu protein-like 1 OS=Homo sapiens OX=9606 GN=COBLL1 PE=1 SV=3	7	7	7	7	1128	123.8	6.58	7.11	111.4	112.9	83.5	108.5	87.9	95.8
Q99598	Translin-associated protein X OS=Homo sapiens OX=9606 GN=TSNAX PE=1 SV=1	22	6	9	6	290	33.1	6.55	13.7	96.2	93.4	125	82.5	115.1	87.8
Q08209	Serine/threonine-protein phosphatase 2B catalytic subunit alpha isoform OS=Homo sapiens OX=9606 GN=PPP3CA PE=1 SV=1	12	5	7	2	521	58.7	5.86	10.89	101.8	106.6	104	91.9	108.7	87.1
P36969	Phospholipid hydroperoxide glutathione peroxidase OS=Homo sapiens OX=9606 GN=GPX4 PE=1 SV=3	32	6	7	6	197	22.2	8.37	10.53	98.6	85	97.3	84.1	146.2	88.7
Q9HCB6	Spondin-1 OS=Homo sapiens OX=9606 GN=SPON1 PE=1 SV=2	10	7	8	7	807	90.9	6.11	10.23	115.8	108.2	96.7	96.2	77.3	105.8
Q08378	Golgin subfamily A member 3 OS=Homo sapiens OX=9606 GN=GOLGA3 PE=1 SV=2	7	10	10	10	1498	167.3	5.44	1.67	99.5	98.7	95.5	96.2	108.9	101.2
P48426	Phosphatidylinositol 5-phosphate 4-kinase type-2 alpha OS=Homo sapiens OX=9606 GN=PIP4K2A PE=1 SV=2	18	7	7	3	406	46.2	6.99	8.86	104.3	106	85.3	118.4	88.3	97.8
Q9Y3U8	60S ribosomal protein L36 OS=Homo sapiens OX=9606 GN=RPL36 PE=1 SV=3	36	5	11	5	105	12.2	11.59	22.3	107.6	81	113.2	84.7	127.8	85.8
Q02978	Mitochondrial 2-oxoglutarate/malate carrier protein OS=Homo sapiens OX=9606 GN=SLC25A11 PE=1 SV=3	20	6	7	6	314	34	9.91	9.7	92.7	96.4	96.2	108.2	112	94.4
P32322	Pyrroline-5-carboxylate reductase 1, mitochondrial OS=Homo sapiens OX=9606 GN=PYCR1 PE=1 SV=2	20	4	4	4	319	33.3	7.61	9.65	83.4	92.4	130.7	79.4	128.6	85.6
Q13242	Serine/arginine-rich splicing factor 9 OS=Homo sapiens OX=9606 GN=SRSF9 PE=1 SV=1	30	6	7	6	221	25.5	8.65	12.83	90.2	105.1	106	101.6	97.9	99.2
P04839	Cytochrome b-245 heavy chain OS=Homo sapiens OX=9606 GN=CYBB PE=1 SV=2	15	6	7	6	570	65.3	8.63	8.3	86.6	117.7	75.8	121.6	89.4	108.8
P48163	NADP-dependent malic enzyme OS=Homo sapiens OX=9606 GN=ME1 PE=1 SV=1	13	7	8	7	572	64.1	6.13	6.18	106	94.3	111.7	95.6	99.8	92.7
Q7Z4I7	LIM and senescent cell antigen-like-containing domain protein 2 OS=Homo sapiens OX=9606 GN=LIMS2 PE=1 SV=1	13	5	10	1	341	38.9	8.05	22.44	123.2	114.4	79.4	108.5	85.1	89.5
Q8WW12	PEST proteolytic signal-containing nuclear protein OS=Homo sapiens OX=9606 GN=PCNP PE=1 SV=2	27	4	10	4	178	18.9	7.49	2.74	92.3	91.6	116.6	86.1	127.3	86.1
Q13155	Aminoacyl tRNA synthase complex-interacting multifunctional protein 2 OS=Homo sapiens OX=9606 GN=AIMP2 PE=1 SV=2	24	6	7	6	320	35.3	8.22	12.08	92.5	89.2	145	79.2	116.9	77.2
P63173	60S ribosomal protein L38 OS=Homo sapiens OX=9606 GN=RPL38 PE=1 SV=2	50	4	9	4	70	8.2	10.1	15.04	101.6	84.5	112.3	94.1	116.7	90.8
Q13619	Cullin-4A OS=Homo sapiens OX=9606 GN=CUL4A PE=1 SV=3	11	9	10	5	759	87.6	8.13	11.12	99.7	90.8	126.1	91.7	97.6	94.1
Q9NQW7	Xaa-Pro aminopeptidase 1 OS=Homo sapiens OX=9606 GN=XPNPEP1 PE=1 SV=3	8	4	7	4	623	69.9	5.67	8.56	105.7	104.2	90.8	102.4	95.2	101.6
P02766	Transthyretin OS=Homo sapiens OX=9606 GN=TTR PE=1 SV=1	40	4	7	4	147	15.9	5.76	14.32	115.8	75.7	71.4	85.2	123.1	128.8
O43447	Peptidyl-prolyl cis-trans isomerase H OS=Homo sapiens OX=9606 GN=PPIH PE=1 SV=1	33	6	15	5	177	19.2	8.07	17.03	93.9	91.6	126.9	92.2	105	90.5
Q92696	Geranylgeranyl transferase type-2 subunit alpha OS=Homo sapiens OX=9606 GN=RABGGTA PE=1 SV=2	13	8	8	8	567	65	5.67	9.91	101.2	96.6	110	96.1	103.2	93
Q15257	Serine/threonine-protein phosphatase 2A activator OS=Homo sapiens OX=9606 GN=PTPA PE=1 SV=3	15	4	10	4	358	40.6	5.94	5.12	99.9	99.5	103.6	105.5	100.3	91.2
Q9NRX4	14 kDa phosphohistidine phosphatase OS=Homo sapiens OX=9606 GN=PHPT1 PE=1 SV=1	41	6	10	6	125	13.8	6.07	16.36	96.4	84.8	120.2	86.9	116.3	95.3
Q14498	RNA-binding protein 39 OS=Homo sapiens OX=9606 GN=RBM39 PE=1 SV=2	13	6	7	6	530	59.3	10.1	8.95	93.3	86.3	134.7	86.3	114.3	84.9
Q16527	Cysteine and glycine-rich protein 2 OS=Homo sapiens OX=9606 GN=CSRP2 PE=1 SV=3	40	6	7	6	193	20.9	8.62	9.2	130.6	107.1	100.6	77.6	100.3	83.8
P51970	NADH dehydrogenase [ubiquinone] 1 alpha subcomplex subunit 8 OS=Homo sapiens OX=9606 GN=NDUFA8 PE=1 SV=3	32	4	7	4	172	20.1	7.65	9.83	102.9	83.7	113.6	81.4	136.5	81.8
Q15654	Thyroid receptor-interacting protein 6 OS=Homo sapiens OX=9606 GN=TRIP6 PE=1 SV=3	15	5	7	5	476	50.3	7.37	4.31	105.5	91.8	112.6	86.7	113	90.5
P26885	Peptidyl-prolyl cis-trans isomerase FKBP2 OS=Homo sapiens OX=9606 GN=FKBP2 PE=1 SV=2	32	5	8	5	142	15.6	9.13	15.08	91.9	95.4	108.2	81.4	114.9	108.3
P46109	Crk-like protein OS=Homo sapiens OX=9606 GN=CRKL PE=1 SV=1	18	5	11	5	303	33.8	6.74	10.19	92.1	131.1	73.2	135.2	60.9	107.7
Q9UBQ7	Glyoxylate reductase/hydroxypyruvate reductase OS=Homo sapiens OX=9606 GN=GRHPR PE=1 SV=1	18	4	9	4	328	35.6	7.39	15.15	83	70.8	115.8	83.1	158.7	88.5
Q9UMS6	Synaptopodin-2 OS=Homo sapiens OX=9606 GN=SYNPO2 PE=1 SV=2	8	7	8	7	1093	117.4	8.57	3.39	109	106.5	90.4	100.5	98.4	95.3
Q13765	Nascent polypeptide-associated complex subunit alpha OS=Homo sapiens OX=9606 GN=NACA PE=1 SV=1	13	2	7	2	215	23.4	4.56	17.11	92.9	83.8	119	87.1	127.2	89.9
P20042	Eukaryotic translation initiation factor 2 subunit 2 OS=Homo sapiens OX=9606 GN=EIF2S2 PE=1 SV=2	20	7	8	7	333	38.4	5.8	12.96	99.2	95.4	109	93.7	111.5	91.1
Q9NTZ6	RNA-binding protein 12 OS=Homo sapiens OX=9606 GN=RBM12 PE=1 SV=1	9	7	8	7	932	97.3	8.63	10.95	86.9	112.9	109.9	95.5	100.1	94.7
Q9Y6C9	Mitochondrial carrier homolog 2 OS=Homo sapiens OX=9606 GN=MTCH2 PE=1 SV=1	18	3	4	3	303	33.3	7.97	9.53	88.7	97.3	131.1	86.2	100.9	95.8
Q6XQN6	Nicotinate phosphoribosyltransferase OS=Homo sapiens OX=9606 GN=NAPRT PE=1 SV=2	16	6	10	6	538	57.5	5.68	11.27	98.9	102	85	108.1	107.2	98.8
P13747	HLA class I histocompatibility antigen, alpha chain E OS=Homo sapiens OX=9606 GN=HLA-E PE=1 SV=4	11	4	11	2	358	40	5.83	15.31
Q13425	Beta-2-syntrophin OS=Homo sapiens OX=9606 GN=SNTB2 PE=1 SV=1	13	7	7	6	540	57.9	8.82	13.62	115.1	111.4	89.4	103.5	82.8	97.7
P10620	Microsomal glutathione S-transferase 1 OS=Homo sapiens OX=9606 GN=MGST1 PE=1 SV=1	9	2	9	2	155	17.6	9.39	17.59	72.6	75	141	75.2	166.7	69.6
Q96JJ3	Engulfment and cell motility protein 2 OS=Homo sapiens OX=9606 GN=ELMO2 PE=1 SV=2	12	7	8	5	720	82.6	5.9	2.37	104.1	96.3	105.3	100.7	99.5	94.2
O43747	AP-1 complex subunit gamma-1 OS=Homo sapiens OX=9606 GN=AP1G1 PE=1 SV=5	7	6	8	6	822	91.3	6.8	11.37	109.7	102	109.5	96.2	93.1	89.5
Q16836	Hydroxyacyl-coenzyme A dehydrogenase, mitochondrial OS=Homo sapiens OX=9606 GN=HADH PE=1 SV=3	18	8	13	8	314	34.3	8.85	15.78	85.5	69	165.6	72.8	121.7	85.3
Q08170	Serine/arginine-rich splicing factor 4 OS=Homo sapiens OX=9606 GN=SRSF4 PE=1 SV=2	10	5	5	3	494	56.6	11.52	11.33	94.5	96.4	141.9	78.8	118.1	70.3
O00273	DNA fragmentation factor subunit alpha OS=Homo sapiens OX=9606 GN=DFFA PE=1 SV=1	20	6	8	6	331	36.5	4.79	7.03	90.5	80.3	137.7	84.2	116.4	90.9
Q9P2T1	GMP reductase 2 OS=Homo sapiens OX=9606 GN=GMPR2 PE=1 SV=1	22	8	9	6	348	37.9	7.23	3.77	99	100.4	98.2	104.9	101.7	95.8
Q8N3V7	Synaptopodin OS=Homo sapiens OX=9606 GN=SYNPO PE=1 SV=2	10	8	9	8	929	99.4	8.72	4.33	115.2	107	104.8	101.4	89.4	82.3
P11166	Solute carrier family 2, facilitated glucose transporter member 1 OS=Homo sapiens OX=9606 GN=SLC2A1 PE=1 SV=2	10	5	10	5	492	54	8.72	15.22	77.1	138.8	57.2	148.6	54.4	123.9
P35527	Keratin, type I cytoskeletal 9 OS=Homo sapiens OX=9606 GN=KRT9 PE=1 SV=3	13	7	11	6	623	62	5.24	11.56	115.4	111.2	83.7	87.9	74.8	127
P46379	Large proline-rich protein BAG6 OS=Homo sapiens OX=9606 GN=BAG6 PE=1 SV=2	7	6	6	6	1132	119.3	5.6	11.82	96.3	85.8	137.5	84.4	108.3	87.7
Q5JTZ9	Alanine--tRNA ligase, mitochondrial OS=Homo sapiens OX=9606 GN=AARS2 PE=1 SV=1	9	8	8	8	985	107.3	6.27	3.97	96.3	97.6	124.3	84.9	107.5	89.4
Q9ULP9	TBC1 domain family member 24 OS=Homo sapiens OX=9606 GN=TBC1D24 PE=1 SV=2	11	5	6	5	559	62.9	7.36	11.41	97.8	91.3	122.4	89.3	108.9	90.2
Q9BTT0	Acidic leucine-rich nuclear phosphoprotein 32 family member E OS=Homo sapiens OX=9606 GN=ANP32E PE=1 SV=1	12	3	7	3	268	30.7	3.85	13.59	68.5	71.3	139.3	70	175.4	75.4
P80303	Nucleobindin-2 OS=Homo sapiens OX=9606 GN=NUCB2 PE=1 SV=3	18	6	9	6	420	50.2	5.12	11.59	87.8	92	114.8	90.6	125.6	89.2
Q9H910	Jupiter microtubule associated homolog 2 OS=Homo sapiens OX=9606 GN=JPT2 PE=1 SV=1	44	5	6	5	190	20.1	9.26	6.16	90.7	87	155.2	75.4	98.7	93.1
O95050	Indolethylamine N-methyltransferase OS=Homo sapiens OX=9606 GN=INMT PE=1 SV=3	23	6	8	6	263	28.9	5.27	11.27	209.7	196.4	41.3	51	45	56.5
Q9H0Q0	Protein FAM49A OS=Homo sapiens OX=9606 GN=FAM49A PE=2 SV=1	11	3	7	1	323	37.3	6.01	15.14
P02776	Platelet factor 4 OS=Homo sapiens OX=9606 GN=PF4 PE=1 SV=2	36	4	7	4	101	10.8	8.62	12.75	77.8	100.3	87	105.5	93.5	135.8
Q9H9B4	Sideroflexin-1 OS=Homo sapiens OX=9606 GN=SFXN1 PE=1 SV=4	25	7	7	6	322	35.6	9.07	10.29	95.4	83	153.3	77.8	109.6	80.8
Q9H0W9	Ester hydrolase C11orf54 OS=Homo sapiens OX=9606 GN=C11orf54 PE=1 SV=1	23	6	9	6	315	35.1	6.7	13.04	91.8	89.6	119.8	85.4	128.2	85.3
P37235	Hippocalcin-like protein 1 OS=Homo sapiens OX=9606 GN=HPCAL1 PE=1 SV=3	34	6	9	4	193	22.3	5.35	16.52	120.3	106.6	83.3	100.7	100.6	88.6
Q15020	Squamous cell carcinoma antigen recognized by T-cells 3 OS=Homo sapiens OX=9606 GN=SART3 PE=1 SV=1	10	8	9	8	963	109.9	5.57	6.19	96.9	93.8	106	94.4	105.6	103.3
Q13243	Serine/arginine-rich splicing factor 5 OS=Homo sapiens OX=9606 GN=SRSF5 PE=1 SV=1	21	5	9	4	272	31.2	11.59	10.02	98.5	92	119.4	90.5	109	90.6
O00757	Fructose-1,6-bisphosphatase isozyme 2 OS=Homo sapiens OX=9606 GN=FBP2 PE=1 SV=2	14	4	9	2	339	36.7	7.23	18.12	102.3	74.7	112.8	85.9	145.9	78.3
Q9H008	Phospholysine phosphohistidine inorganic pyrophosphate phosphatase OS=Homo sapiens OX=9606 GN=LHPP PE=1 SV=2	29	6	6	6	270	29.1	6.15	6.81	103.4	97.8	114.2	93.8	94.8	95.9
Q01130	Serine/arginine-rich splicing factor 2 OS=Homo sapiens OX=9606 GN=SRSF2 PE=1 SV=4	14	3	9	3	221	25.5	11.85	9.49	99.8	84.2	133	83.6	116.6	82.8
P55290	Cadherin-13 OS=Homo sapiens OX=9606 GN=CDH13 PE=1 SV=1	7	5	6	5	713	78.2	4.98	15.25	141.1	129.8	57.2	108.1	66.3	97.5
P15328	Folate receptor alpha OS=Homo sapiens OX=9606 GN=FOLR1 PE=1 SV=3	19	5	9	5	257	29.8	7.97	13.02	104.9	87.9	97	76	160.9	73.2
Q00765	Receptor expression-enhancing protein 5 OS=Homo sapiens OX=9606 GN=REEP5 PE=1 SV=3	20	5	9	5	189	21.5	8.1	17.61	98.1	119.9	110.5	90.9	99.9	80.8
Q96EP5	DAZ-associated protein 1 OS=Homo sapiens OX=9606 GN=DAZAP1 PE=1 SV=1	12	3	6	3	407	43.4	8.56	8.51	89.1	100.6	94.3	115.5	91.9	108.6
P08237	ATP-dependent 6-phosphofructokinase, muscle type OS=Homo sapiens OX=9606 GN=PFKM PE=1 SV=2	11	7	10	5	780	85.1	7.99	7.18	101.5	112	70.9	105.6	80.9	129.2
P47914	60S ribosomal protein L29 OS=Homo sapiens OX=9606 GN=RPL29 PE=1 SV=2	19	3	9	3	159	17.7	11.66	17.86	107.1	82.1	108.3	85.8	123	93.8
P35247	Pulmonary surfactant-associated protein D OS=Homo sapiens OX=9606 GN=SFTPD PE=1 SV=3	18	4	5	4	375	37.7	6.6	11.16	108.9	114.4	114.1	105.4	65.8	91.4
Q6IAA8	Ragulator complex protein LAMTOR1 OS=Homo sapiens OX=9606 GN=LAMTOR1 PE=1 SV=2	30	4	5	4	161	17.7	5.15	8.41	93.3	100.5	100.3	94.2	118	93.7
P30047	GTP cyclohydrolase 1 feedback regulatory protein OS=Homo sapiens OX=9606 GN=GCHFR PE=1 SV=3	49	2	5	2	84	9.7	6.54	5.28	113.9	97.1	99.8	96.4	96.5	96.2
Q08722	Leukocyte surface antigen CD47 OS=Homo sapiens OX=9606 GN=CD47 PE=1 SV=1	12	4	9	4	323	35.2	7.21	13.14	112	113.9	91.5	99.5	96.1	87
Q9H8Y8	Golgi reassembly-stacking protein 2 OS=Homo sapiens OX=9606 GN=GORASP2 PE=1 SV=3	19	7	9	7	452	47.1	4.82	4.71	89.3	69	142.1	66.3	159.9	73.4
Q15369	Elongin-C OS=Homo sapiens OX=9606 GN=ELOC PE=1 SV=1	47	4	8	4	112	12.5	4.78	8.66	84.5	101.7	120.3	82.2	116.1	95.3
O00471	Exocyst complex component 5 OS=Homo sapiens OX=9606 GN=EXOC5 PE=1 SV=1	11	8	8	7	708	81.8	6.71	8.83	107.6	99.3	101.5	97	105.2	89.5
P00533	Epidermal growth factor receptor OS=Homo sapiens OX=9606 GN=EGFR PE=1 SV=2	6	8	8	8	1210	134.2	6.68	9.69	87.5	100.7	129.4	85.9	105.2	91.3
P15153	Ras-related C3 botulinum toxin substrate 2 OS=Homo sapiens OX=9606 GN=RAC2 PE=1 SV=1	26	5	11	1	192	21.4	7.61	18.19	108.7	97.1	93.5	94.4	104	102.3
P15559	NAD(P)H dehydrogenase [quinone] 1 OS=Homo sapiens OX=9606 GN=NQO1 PE=1 SV=1	24	6	7	6	274	30.8	8.88	12.61	116.4	80.2	153.9	70.2	107.1	72.3
Q96GX9	Methylthioribulose-1-phosphate dehydratase OS=Homo sapiens OX=9606 GN=APIP PE=1 SV=1	20	4	7	4	242	27.1	7.12	14.72	94.1	75.6	118	75.8	142.6	93.9
Q05209	Tyrosine-protein phosphatase non-receptor type 12 OS=Homo sapiens OX=9606 GN=PTPN12 PE=1 SV=3	10	8	9	8	780	88.1	5.62	8.68	104.7	97.4	109.1	88.6	113.5	86.8
O60884	DnaJ homolog subfamily A member 2 OS=Homo sapiens OX=9606 GN=DNAJA2 PE=1 SV=1	17	7	8	7	412	45.7	6.48	7.34	107.6	95.8	111.5	90.5	100.8	93.9
Q9UBR2	Cathepsin Z OS=Homo sapiens OX=9606 GN=CTSZ PE=1 SV=1	18	5	9	5	303	33.8	7.11	11.26	110.1	68.6	119.2	81.7	141.7	78.7
Q92882	Osteoclast-stimulating factor 1 OS=Homo sapiens OX=9606 GN=OSTF1 PE=1 SV=2	27	4	5	4	214	23.8	5.68	10	102	126.4	83.9	102.1	88.7	96.9
Q96MM6	Heat shock 70 kDa protein 12B OS=Homo sapiens OX=9606 GN=HSPA12B PE=1 SV=2	11	7	7	7	686	75.6	8.53	9.18	116.2	136.9	71	120.8	57	98
Q96HY6	DDRGK domain-containing protein 1 OS=Homo sapiens OX=9606 GN=DDRGK1 PE=1 SV=2	15	4	5	4	314	35.6	5.12	14.31	99.2	99.4	104	102.8	91.9	102.7
P36915	Guanine nucleotide-binding protein-like 1 OS=Homo sapiens OX=9606 GN=GNL1 PE=1 SV=2	11	6	9	6	607	68.6	5.8	8.89	103.1	96.3	120.2	91.2	98.3	90.9
P00748	Coagulation factor XII OS=Homo sapiens OX=9606 GN=F12 PE=1 SV=3	11	7	8	7	615	67.7	7.74	9.89	113.4	138.2	78.5	112	68.3	89.6
P08240	Signal recognition particle receptor subunit alpha OS=Homo sapiens OX=9606 GN=SRPRA PE=1 SV=2	11	7	8	7	638	69.8	8.95	10.07	91.2	89.9	104.1	89.3	135.1	90.4
P27708	CAD protein OS=Homo sapiens OX=9606 GN=CAD PE=1 SV=3	3	7	8	7	2225	242.8	6.46	8.43	95.3	98.4	105.5	95.6	103.4	101.8
Q96DI7	U5 small nuclear ribonucleoprotein 40 kDa protein OS=Homo sapiens OX=9606 GN=SNRNP40 PE=1 SV=1	23	6	9	6	357	39.3	8.1	17.64	102	80.9	131.4	81.4	129.1	75.2
P62851	40S ribosomal protein S25 OS=Homo sapiens OX=9606 GN=RPS25 PE=1 SV=1	24	4	9	4	125	13.7	10.11	23.19	95.6	87.7	114.1	90.4	120.6	91.6
Q9UJW0	Dynactin subunit 4 OS=Homo sapiens OX=9606 GN=DCTN4 PE=1 SV=1	13	6	6	6	460	52.3	7.34	10.52	111.9	100.9	93.2	98.5	98.5	97
P51636	Caveolin-2 OS=Homo sapiens OX=9606 GN=CAV2 PE=1 SV=2	17	2	6	2	162	18.3	5.27	10.85	134.7	135.6	62.8	121.6	46.1	99.3
Q10713	Mitochondrial-processing peptidase subunit alpha OS=Homo sapiens OX=9606 GN=PMPCA PE=1 SV=2	15	7	8	7	525	58.2	6.92	6.93	94.3	93.8	131.5	82.8	116.1	81.6
Q96K76	Ubiquitin carboxyl-terminal hydrolase 47 OS=Homo sapiens OX=9606 GN=USP47 PE=1 SV=3	8	8	8	8	1375	157.2	5.08	6.45	100.4	100	109.7	100	104.8	85.1
P49755	Transmembrane emp24 domain-containing protein 10 OS=Homo sapiens OX=9606 GN=TMED10 PE=1 SV=2	24	6	11	6	219	25	7.44	20.65	89.2	77.4	120.3	75.7	165.3	72.1
P46821	Microtubule-associated protein 1B OS=Homo sapiens OX=9606 GN=MAP1B PE=1 SV=2	4	8	9	7	2468	270.5	4.81	4.41	107.9	94.8	103.6	98.5	105.5	89.6
P16144	Integrin beta-4 OS=Homo sapiens OX=9606 GN=ITGB4 PE=1 SV=5	5	7	7	7	1822	202	6.09	5.3	106.4	84.7	115.7	87.6	122.4	83.1
P15090	Fatty acid-binding protein, adipocyte OS=Homo sapiens OX=9606 GN=FABP4 PE=1 SV=3	25	3	8	3	132	14.7	7.14	15.24	127.9	133.7	53.1	93.3	67.9	124.1
P62081	40S ribosomal protein S7 OS=Homo sapiens OX=9606 GN=RPS7 PE=1 SV=1	18	4	8	4	194	22.1	10.1	10.75	97	82.1	123.2	81.8	130.8	85.1
Q15056	Eukaryotic translation initiation factor 4H OS=Homo sapiens OX=9606 GN=EIF4H PE=1 SV=5	23	6	6	6	248	27.4	7.23	7.17	96.7	83.8	134.9	83.2	118.8	82.6
Q9C0C9	(E3-independent) E2 ubiquitin-conjugating enzyme OS=Homo sapiens OX=9606 GN=UBE2O PE=1 SV=3	5	6	6	6	1292	141.2	5.12	12.79	90.4	106.9	100.3	111.1	87.1	104.2
Q8TCJ2	Dolichyl-diphosphooligosaccharide--protein glycosyltransferase subunit STT3B OS=Homo sapiens OX=9606 GN=STT3B PE=1 SV=1	7	6	11	6	826	93.6	8.91	11.46	96.2	86.5	109.9	78.9	150.4	78
P62913	60S ribosomal protein L11 OS=Homo sapiens OX=9606 GN=RPL11 PE=1 SV=2	21	4	7	4	178	20.2	9.6	13.68	102.9	87.6	117.8	82.8	128.8	80.1
P09496	Clathrin light chain A OS=Homo sapiens OX=9606 GN=CLTA PE=1 SV=1	19	6	11	6	248	27.1	4.51	19.41	103.8	87.1	111	90.5	122.9	84.7
Q00796	Sorbitol dehydrogenase OS=Homo sapiens OX=9606 GN=SORD PE=1 SV=4	11	4	7	4	357	38.3	7.97	12.22	89.3	81.6	133.5	78.1	138.4	79.1
Q7L266	Isoaspartyl peptidase/L-asparaginase OS=Homo sapiens OX=9606 GN=ASRGL1 PE=1 SV=2	14	3	4	3	308	32	6.24	10.76	79.7	93.8	136.5	93.9	110.2	86
Q9Y5M8	Signal recognition particle receptor subunit beta OS=Homo sapiens OX=9606 GN=SRPRB PE=1 SV=3	21	5	5	5	271	29.7	9.04	9.05	82.5	71.3	128.6	72.3	157.8	87.5
Q8TEM1	Nuclear pore membrane glycoprotein 210 OS=Homo sapiens OX=9606 GN=NUP210 PE=1 SV=3	5	10	10	10	1887	205	6.81	14.08	82.7	84.9	123.8	84.1	135.5	88.9
O14558	Heat shock protein beta-6 OS=Homo sapiens OX=9606 GN=HSPB6 PE=1 SV=2	29	4	10	4	160	17.1	6.4	9.52	102.9	106.9	78.5	112.1	82.3	117.4
Q9P0V9	Septin-10 OS=Homo sapiens OX=9606 GN=SEPTIN10 PE=1 SV=2	11	4	6	3	454	52.6	6.8	10.05	98.3	100.8	101.2	94.3	102.9	102.5
Q8WXA9	Splicing regulatory glutamine/lysine-rich protein 1 OS=Homo sapiens OX=9606 GN=SREK1 PE=1 SV=1	12	5	5	5	508	59.3	10.39	5.45	90.1	77.2	159.6	72.6	126.4	74.1
Q9HBR0	Putative sodium-coupled neutral amino acid transporter 10 OS=Homo sapiens OX=9606 GN=SLC38A10 PE=1 SV=2	7	7	7	7	1119	119.7	5.73	11.39	82	96.7	124.5	82.8	133.4	80.6
P09661	U2 small nuclear ribonucleoprotein A' OS=Homo sapiens OX=9606 GN=SNRPA1 PE=1 SV=2	16	4	6	4	255	28.4	8.62	11.07	95.3	100.8	108.1	99.2	105.5	91.2
P46734	Dual specificity mitogen-activated protein kinase kinase 3 OS=Homo sapiens OX=9606 GN=MAP2K3 PE=1 SV=2	18	6	6	3	347	39.3	7.43	12.43	104.1	94.5	89.6	94.3	124.1	93.4
Q8NCA5	Protein FAM98A OS=Homo sapiens OX=9606 GN=FAM98A PE=1 SV=2	10	3	6	1	518	55.2	8.95	8.75
O15061	Synemin OS=Homo sapiens OX=9606 GN=SYNM PE=1 SV=2	5	8	10	8	1565	172.7	5.16	5.46	108.5	129.8	71.9	110.6	79.4	99.8
Q8WWM7	Ataxin-2-like protein OS=Homo sapiens OX=9606 GN=ATXN2L PE=1 SV=2	7	6	7	6	1075	113.3	8.59	11.95	100.3	95.1	115.8	91.4	113.8	83.7
Q8NFV4	Protein ABHD11 OS=Homo sapiens OX=9606 GN=ABHD11 PE=1 SV=1	25	5	8	5	315	34.7	9.48	12.73	83.9	96.2	112.9	96	113.8	97.2
Q15642	Cdc42-interacting protein 4 OS=Homo sapiens OX=9606 GN=TRIP10 PE=1 SV=3	13	7	8	7	601	68.3	5.73	5.9	111	100.6	91.1	95.6	101.9	99.8
P61769	Beta-2-microglobulin OS=Homo sapiens OX=9606 GN=B2M PE=1 SV=1	25	4	8	4	119	13.7	6.52	14.34	119.3	105.3	103.9	104	71.5	95.9
Q99538	Legumain OS=Homo sapiens OX=9606 GN=LGMN PE=1 SV=1	7	3	8	3	433	49.4	6.55	11.64	96.8	57.4	124.7	64.7	172.6	83.9
Q9Y6W5	Wiskott-Aldrich syndrome protein family member 2 OS=Homo sapiens OX=9606 GN=WASF2 PE=1 SV=3	12	6	7	6	498	54.3	5.53	13.56	107.5	96.2	110	100.1	97.3	89
Q9NRR5	Ubiquilin-4 OS=Homo sapiens OX=9606 GN=UBQLN4 PE=1 SV=2	9	5	6	3	601	63.8	5.22	9.8	86.2	94.3	131.8	88.1	118	81.6
P62910	60S ribosomal protein L32 OS=Homo sapiens OX=9606 GN=RPL32 PE=1 SV=2	33	4	7	4	135	15.9	11.33	16.21	104.2	83.4	112.1	86.7	119	94.6
Q96PU8	Protein quaking OS=Homo sapiens OX=9606 GN=QKI PE=1 SV=1	22	6	8	6	341	37.6	8.56	8.13	113.7	107.4	88.4	110.4	80.6	99.5
P21926	CD9 antigen OS=Homo sapiens OX=9606 GN=CD9 PE=1 SV=4	13	5	7	5	228	25.4	7.15	9.1	121.3	113.8	88.7	96.7	83.7	95.7
P78356	Phosphatidylinositol 5-phosphate 4-kinase type-2 beta OS=Homo sapiens OX=9606 GN=PIP4K2B PE=1 SV=1	18	7	8	3	416	47.3	7.33	7.95	101	97.3	103.8	99.7	99.5	98.7
Q8TD19	Serine/threonine-protein kinase Nek9 OS=Homo sapiens OX=9606 GN=NEK9 PE=1 SV=2	6	5	6	5	979	107.1	5.74	12.13	89.3	89.9	128.8	107.8	99.6	84.5
Q9NR56	Muscleblind-like protein 1 OS=Homo sapiens OX=9606 GN=MBNL1 PE=1 SV=2	12	5	8	2	388	41.8	8.9	12.43	104	84.6	120.9	76.1	133.2	81.2
Q10589	Bone marrow stromal antigen 2 OS=Homo sapiens OX=9606 GN=BST2 PE=1 SV=1	24	5	9	5	180	19.8	5.6	11.13	127.2	142.1	68.6	144.1	36.3	81.7
O14841	5-oxoprolinase OS=Homo sapiens OX=9606 GN=OPLAH PE=1 SV=3	5	4	5	4	1288	137.4	6.58	11.05	87.1	127.8	107.8	75.3	111.8	90.1
Q5VW32	BRO1 domain-containing protein BROX OS=Homo sapiens OX=9606 GN=BROX PE=1 SV=1	17	5	6	5	411	46.4	7.65	12.9	89.3	94.1	99.4	99.6	124.8	92.7
P01116	GTPase KRas OS=Homo sapiens OX=9606 GN=KRAS PE=1 SV=1	28	4	6	2	189	21.6	6.77	8.04	98.6	109.7	75.1	119.7	82	114.8
P62899	60S ribosomal protein L31 OS=Homo sapiens OX=9606 GN=RPL31 PE=1 SV=1	42	6	15	6	125	14.5	10.54	24.31	100.3	90.3	111	86.3	119.9	92.1
Q03591	Complement factor H-related protein 1 OS=Homo sapiens OX=9606 GN=CFHR1 PE=1 SV=2	15	5	9	2	330	37.6	7.39	10.11	147.5	82.4	73.2	106.1	68.8	121.9
Q96FJ2	Dynein light chain 2, cytoplasmic OS=Homo sapiens OX=9606 GN=DYNLL2 PE=1 SV=1	33	2	7	2	89	10.3	7.37	13.12	94.2	92	113.5	85.2	132.7	82.5
O15264	Mitogen-activated protein kinase 13 OS=Homo sapiens OX=9606 GN=MAPK13 PE=1 SV=1	18	6	7	6	365	42.1	8.38	8.28	95.1	84.1	126.7	83.7	130.2	80.2
P01780	Immunoglobulin heavy variable 3-7 OS=Homo sapiens OX=9606 GN=IGHV3-7 PE=1 SV=2	23	3	10	2	117	12.9	6.57	18.83	90.2	112.4	69.1	125.2	73.4	129.7
Q12765	Secernin-1 OS=Homo sapiens OX=9606 GN=SCRN1 PE=1 SV=2	14	5	7	5	414	46.4	4.75	14.72	118.2	105.7	104.2	94.4	75.7	102
Q96DC8	Enoyl-CoA hydratase domain-containing protein 3, mitochondrial OS=Homo sapiens OX=9606 GN=ECHDC3 PE=1 SV=2	17	4	6	4	303	32.6	8.65	8.74	98.7	99.4	128.9	84	102.2	86.9
Q9UDW1	Cytochrome b-c1 complex subunit 9 OS=Homo sapiens OX=9606 GN=UQCR10 PE=1 SV=3	41	2	3	2	63	7.3	9.47	6.16	101.6	83.5	126.4	79.1	134.3	75.1
Q9UGP4	LIM domain-containing protein 1 OS=Homo sapiens OX=9606 GN=LIMD1 PE=1 SV=1	12	5	7	5	676	72.1	6.65	4.73	104.3	108.8	97.2	90.2	105.7	93.9
Q16539	Mitogen-activated protein kinase 14 OS=Homo sapiens OX=9606 GN=MAPK14 PE=1 SV=3	14	5	6	5	360	41.3	5.78	12.61	89.8	93.9	120.9	84	130.3	81.1
P55209	Nucleosome assembly protein 1-like 1 OS=Homo sapiens OX=9606 GN=NAP1L1 PE=1 SV=1	15	5	10	4	391	45.3	4.46	12.05	99.2	89.4	111.8	99.2	104.3	96
Q14157	Ubiquitin-associated protein 2-like OS=Homo sapiens OX=9606 GN=UBAP2L PE=1 SV=2	7	6	7	6	1087	114.5	7.11	6.22	98.2	88.3	120.1	91.5	113.1	88.7
P63167	Dynein light chain 1, cytoplasmic OS=Homo sapiens OX=9606 GN=DYNLL1 PE=1 SV=1	33	2	9	2	89	10.4	7.4	19.79	123.8	116.5	88.4	100.6	81.3	89.4
O75781	Paralemmin-1 OS=Homo sapiens OX=9606 GN=PALM PE=1 SV=2	15	5	6	4	387	42.1	5	10.15	118.3	110.6	79.8	100.9	88.9	101.5
P46782	40S ribosomal protein S5 OS=Homo sapiens OX=9606 GN=RPS5 PE=1 SV=4	25	6	8	6	204	22.9	9.72	12.84	97	76.2	122.6	77.1	141.5	85.5
P68400	Casein kinase II subunit alpha OS=Homo sapiens OX=9606 GN=CSNK2A1 PE=1 SV=1	20	6	9	6	391	45.1	7.74	9.91	92.9	107.3	96.1	116	88.3	99.3
Q6UXV4	MICOS complex subunit MIC27 OS=Homo sapiens OX=9606 GN=APOOL PE=1 SV=1	30	6	7	6	268	29.1	9.52	5.03	100.1	95	130.9	88.5	101.3	84.3
Q5SRE7	Phytanoyl-CoA dioxygenase domain-containing protein 1 OS=Homo sapiens OX=9606 GN=PHYHD1 PE=1 SV=2	25	5	7	5	291	32.4	6.32	2.6	108.7	87.7	87.7	90.4	127.9	97.6
O76024	Wolframin OS=Homo sapiens OX=9606 GN=WFS1 PE=1 SV=2	8	6	7	6	890	100.2	8.05	11.8	116.7	110.5	99.3	99	87.5	86.9
P02008	Hemoglobin subunit zeta OS=Homo sapiens OX=9606 GN=HBZ PE=1 SV=2	23	3	135	2	142	15.6	8.21	158	51.1	47.9	105.7	270.8	55.4	69.1
Q13247	Serine/arginine-rich splicing factor 6 OS=Homo sapiens OX=9606 GN=SRSF6 PE=1 SV=2	14	5	5	3	344	39.6	11.43	12.7	101.6	75.3	133.6	74.2	139	76.3
Q96AP7	Endothelial cell-selective adhesion molecule OS=Homo sapiens OX=9606 GN=ESAM PE=1 SV=1	17	5	6	5	390	41.2	9.32	6.8	128.1	128	63.3	111.7	78	90.9
Q14738	Serine/threonine-protein phosphatase 2A 56 kDa regulatory subunit delta isoform OS=Homo sapiens OX=9606 GN=PPP2R5D PE=1 SV=1	13	6	9	6	602	69.9	8.13	2.58	86	93.1	109.9	107	111.3	92.8
Q8WXF1	Paraspeckle component 1 OS=Homo sapiens OX=9606 GN=PSPC1 PE=1 SV=1	9	5	5	4	523	58.7	6.67	12.45	102.4	85.9	140.6	79.6	108.8	82.7
Q8NFW8	N-acylneuraminate cytidylyltransferase OS=Homo sapiens OX=9606 GN=CMAS PE=1 SV=2	9	3	5	3	434	48.3	7.93	10.52	104.8	103.1	109.3	96.4	103.1	83.3
P68402	Platelet-activating factor acetylhydrolase IB subunit beta OS=Homo sapiens OX=9606 GN=PAFAH1B2 PE=1 SV=1	31	4	6	4	229	25.6	5.92	12.36	105.5	99.6	97	107.9	95.1	94.8
O60264	SWI/SNF-related matrix-associated actin-dependent regulator of chromatin subfamily A member 5 OS=Homo sapiens OX=9606 GN=SMARCA5 PE=1 SV=1	5	5	7	4	1052	121.8	8.09	9.24	101.1	102.7	110.4	90.4	105.6	89.7
Q9UBT2	SUMO-activating enzyme subunit 2 OS=Homo sapiens OX=9606 GN=UBA2 PE=1 SV=2	10	7	10	7	640	71.2	5.29	12.87	108.8	89.6	119.5	89.1	110.8	82.2
O75223	Gamma-glutamylcyclotransferase OS=Homo sapiens OX=9606 GN=GGCT PE=1 SV=1	24	4	6	4	188	21	5.14	9.39	76.3	77.7	151.7	83.6	132.9	77.8
O15231	Zinc finger protein 185 OS=Homo sapiens OX=9606 GN=ZNF185 PE=1 SV=3	19	7	9	7	689	73.5	7.01	4.01	99.5	96.3	137.8	92.5	85.8	88.2
Q06033	Inter-alpha-trypsin inhibitor heavy chain H3 OS=Homo sapiens OX=9606 GN=ITIH3 PE=1 SV=2	8	5	7	5	890	99.8	5.74	12.83	67.3	79.9	100.7	117.9	100	134.1
Q86Y39	NADH dehydrogenase [ubiquinone] 1 alpha subcomplex subunit 11 OS=Homo sapiens OX=9606 GN=NDUFA11 PE=1 SV=3	35	3	4	3	141	14.8	8.72	8.13	97.3	94.6	88.7	109.1	104.3	106
Q15836	Vesicle-associated membrane protein 3 OS=Homo sapiens OX=9606 GN=VAMP3 PE=1 SV=3	40	3	5	3	100	11.3	8.79	6.57	87.1	123.4	81.7	123.1	93.6	91.2
O95394	Phosphoacetylglucosamine mutase OS=Homo sapiens OX=9606 GN=PGM3 PE=1 SV=1	13	7	7	7	542	59.8	6.25	11.34	106.7	93.6	106.7	79.5	121.4	92
Q15172	Serine/threonine-protein phosphatase 2A 56 kDa regulatory subunit alpha isoform OS=Homo sapiens OX=9606 GN=PPP2R5A PE=1 SV=1	12	5	8	5	486	56.2	6.71	12.36	98.5	96	96.8	81	145.2	82.5
Q15847	Adipogenesis regulatory factor OS=Homo sapiens OX=9606 GN=ADIRF PE=1 SV=1	38	3	8	3	76	7.9	5.31	10.52	141.6	139.9	69.4	103.6	56	89.6
P11182	Lipoamide acyltransferase component of branched-chain alpha-keto acid dehydrogenase complex, mitochondrial OS=Homo sapiens OX=9606 GN=DBT PE=1 SV=3	11	5	5	5	482	53.5	8.51	10.75	89.4	83.1	151.9	84.3	109.2	82.2
P42677	40S ribosomal protein S27 OS=Homo sapiens OX=9606 GN=RPS27 PE=1 SV=3	38	3	5	1	84	9.5	9.45	14.04	109.7	81.1	132.6	78.6	121.8	76.3
O00515	Ladinin-1 OS=Homo sapiens OX=9606 GN=LAD1 PE=1 SV=2	12	5	9	5	517	57.1	9.67	7.31	90	86.3	119.2	86.3	129.7	88.5
Q9Y3L3	SH3 domain-binding protein 1 OS=Homo sapiens OX=9606 GN=SH3BP1 PE=1 SV=3	12	7	7	7	701	75.7	6.77	4.01	102.4	98	96.7	103.7	101.8	97.4
Q9Y3A5	Ribosome maturation protein SBDS OS=Homo sapiens OX=9606 GN=SBDS PE=1 SV=4	14	4	8	4	250	28.7	8.75	14.39	96.7	91	115.8	87	127.5	82.1
P55011	Solute carrier family 12 member 2 OS=Homo sapiens OX=9606 GN=SLC12A2 PE=1 SV=1	6	6	7	6	1212	131.4	6.4	4.64	91.2	84.5	92	84.7	158.9	88.6
P28074	Proteasome subunit beta type-5 OS=Homo sapiens OX=9606 GN=PSMB5 PE=1 SV=3	19	4	6	4	263	28.5	6.92	7.84	91.6	113.2	82.8	97.2	109.6	105.5
P78344	Eukaryotic translation initiation factor 4 gamma 2 OS=Homo sapiens OX=9606 GN=EIF4G2 PE=1 SV=1	9	8	8	8	907	102.3	7.14	4.25	101.4	96.7	109.8	88.3	109.3	94.5
O96019	Actin-like protein 6A OS=Homo sapiens OX=9606 GN=ACTL6A PE=1 SV=1	11	5	6	5	429	47.4	5.6	5.06	96.2	88	122.3	87.2	114.3	92
Q6P179	Endoplasmic reticulum aminopeptidase 2 OS=Homo sapiens OX=9606 GN=ERAP2 PE=1 SV=2	7	7	7	7	960	110.4	6.71	6.16	90.3	84.5	128.2	117.6	91.1	88.4
Q9H4B7	Tubulin beta-1 chain OS=Homo sapiens OX=9606 GN=TUBB1 PE=1 SV=1	10	5	12	1	451	50.3	5.17	18.23	137.3	169.5	85.9	44.8	102.4	60.1
P19525	Interferon-induced, double-stranded RNA-activated protein kinase OS=Homo sapiens OX=9606 GN=EIF2AK2 PE=1 SV=2	10	5	7	5	551	62.1	8.4	10.23	98.2	85.2	138.3	110.4	95.2	72.7
Q9NRY5	Protein FAM114A2 OS=Homo sapiens OX=9606 GN=FAM114A2 PE=1 SV=4	10	4	5	4	505	55.4	4.88	5.75	95.9	86.2	120.9	91.5	112.5	93
P35542	Serum amyloid A-4 protein OS=Homo sapiens OX=9606 GN=SAA4 PE=1 SV=2	28	4	9	4	130	14.7	9.07	15.86	86.7	115.1	62.4	124.4	63.7	147.8
P05771	Protein kinase C beta type OS=Homo sapiens OX=9606 GN=PRKCB PE=1 SV=4	9	6	7	4	671	76.8	7.01	9.5	101.4	101.2	94.1	107.9	93.8	101.7
Q8TCT9	Minor histocompatibility antigen H13 OS=Homo sapiens OX=9606 GN=HM13 PE=1 SV=1	16	5	6	5	377	41.5	6.43	7.27	91.3	81.5	119.3	93.7	125	89.2
Q8IWA5	Choline transporter-like protein 2 OS=Homo sapiens OX=9606 GN=SLC44A2 PE=1 SV=3	10	5	7	5	706	80.1	8.57	7.58	118.8	114.6	92.9	102.1	87.9	83.7
Q7L5N7	Lysophosphatidylcholine acyltransferase 2 OS=Homo sapiens OX=9606 GN=LPCAT2 PE=1 SV=1	8	4	6	4	544	60.2	6.55	9.61	96.7	82.7	113.5	86.2	131.2	89.7
Q13620	Cullin-4B OS=Homo sapiens OX=9606 GN=CUL4B PE=1 SV=4	8	7	8	3	913	103.9	7.37	11.12	91.5	88.2	136.9	95.8	101.5	86
Q9Y5L4	Mitochondrial import inner membrane translocase subunit Tim13 OS=Homo sapiens OX=9606 GN=TIMM13 PE=1 SV=1	37	3	5	3	95	10.5	8.18	5.62	75.2	118.8	98.8	124.9	73.3	109
Q9P2B2	Prostaglandin F2 receptor negative regulator OS=Homo sapiens OX=9606 GN=PTGFRN PE=1 SV=2	7	7	9	7	879	98.5	6.61	7.48	99.6	85.4	132.5	68.8	118.4	95.2
Q15477	Helicase SKI2W OS=Homo sapiens OX=9606 GN=SKIV2L PE=1 SV=3	7	8	8	8	1246	137.7	6.06	4.13	92.6	99.7	102.4	111.8	101.3	92.2
Q2M1Z3	Rho GTPase-activating protein 31 OS=Homo sapiens OX=9606 GN=ARHGAP31 PE=1 SV=2	7	7	7	7	1444	156.9	5.76	4.26	95.1	111.1	78.2	118.1	91.2	106.3
P52294	Importin subunit alpha-5 OS=Homo sapiens OX=9606 GN=KPNA1 PE=1 SV=3	12	6	6	2	538	60.2	5.01	9.87	90.4	99	123.5	90.8	102.8	93.5
Q96CV9	Optineurin OS=Homo sapiens OX=9606 GN=OPTN PE=1 SV=3	11	7	7	7	577	65.9	5.17	7.1	109.9	96.4	99.8	104.3	93.4	96.1
Q13232	Nucleoside diphosphate kinase 3 OS=Homo sapiens OX=9606 GN=NME3 PE=1 SV=2	22	4	5	4	169	19	7.84	7.89	98.9	85.4	125.1	82.2	119	89.5
P27635	60S ribosomal protein L10 OS=Homo sapiens OX=9606 GN=RPL10 PE=1 SV=4	18	4	10	4	214	24.6	10.08	8.77	93.7	72.6	134.2	77	143.8	78.6
P49961	Ectonucleoside triphosphate diphosphohydrolase 1 OS=Homo sapiens OX=9606 GN=ENTPD1 PE=1 SV=1	10	6	9	6	510	57.9	6.34	11.15	115.6	112.8	86.4	103	81.9	100.3
Q9NZL9	Methionine adenosyltransferase 2 subunit beta OS=Homo sapiens OX=9606 GN=MAT2B PE=1 SV=1	18	5	7	5	334	37.5	7.36	4.25	87.2	109.5	86	111.1	96.4	109.8
Q9NVP1	ATP-dependent RNA helicase DDX18 OS=Homo sapiens OX=9606 GN=DDX18 PE=1 SV=2	13	7	7	7	670	75.4	9.5	8.59	91.5	85.7	122.3	88.9	110.5	101.2
Q8IVI9	Nostrin OS=Homo sapiens OX=9606 GN=NOSTRIN PE=1 SV=2	14	6	9	6	506	57.6	8.97	6.74	133.9	127.3	78.9	97.1	68.4	94.3
P01906	HLA class II histocompatibility antigen, DQ alpha 2 chain OS=Homo sapiens OX=9606 GN=HLA-DQA2 PE=1 SV=2	11	2	10	1	255	28	4.88	13.77	84.1	105.3	116.4	125.4	68.1	100.7
O00116	Alkyldihydroxyacetonephosphate synthase, peroxisomal OS=Homo sapiens OX=9606 GN=AGPS PE=1 SV=1	11	5	7	5	658	72.9	7.34	5.19	93.3	95.9	106.9	99.5	114.5	89.8
Q9Y263	Phospholipase A-2-activating protein OS=Homo sapiens OX=9606 GN=PLAA PE=1 SV=2	11	8	9	8	795	87.1	6.37	6.85	105.7	88	111.2	85.6	116.9	92.5
P50416	Carnitine O-palmitoyltransferase 1, liver isoform OS=Homo sapiens OX=9606 GN=CPT1A PE=1 SV=2	11	7	8	7	773	88.3	8.65	4.01	105.5	101	89.9	104.6	99	100
P50135	Histamine N-methyltransferase OS=Homo sapiens OX=9606 GN=HNMT PE=1 SV=1	14	5	9	5	292	33.3	5.34	17.83	91.7	77.8	166.9	74.5	110.3	78.9
Q07507	Dermatopontin OS=Homo sapiens OX=9606 GN=DPT PE=1 SV=2	27	5	7	5	201	24	4.82	11.59	120.1	86.8	103.4	84.1	93.5	112.1
Q9Y3D6	Mitochondrial fission 1 protein OS=Homo sapiens OX=9606 GN=FIS1 PE=1 SV=2	29	5	7	5	152	16.9	8.79	13.62	89.6	98.5	132.1	93.3	101.3	85.2
O94903	Pyridoxal phosphate homeostasis protein OS=Homo sapiens OX=9606 GN=PLPBP PE=1 SV=1	19	4	4	4	275	30.3	7.5	12.42	86.4	105.3	100.2	106.3	102.6	99.2
Q8N3D4	EH domain-binding protein 1-like protein 1 OS=Homo sapiens OX=9606 GN=EHBP1L1 PE=1 SV=2	4	6	6	6	1523	161.8	4.83	7.7	105.3	94.5	113.2	90	102.6	94.3
Q9UHY7	Enolase-phosphatase E1 OS=Homo sapiens OX=9606 GN=ENOPH1 PE=1 SV=1	17	3	4	3	261	28.9	4.78	6.15	94.7	93	122.3	88.2	102.4	99.4
P16885	1-phosphatidylinositol 4,5-bisphosphate phosphodiesterase gamma-2 OS=Homo sapiens OX=9606 GN=PLCG2 PE=1 SV=4	7	8	8	8	1265	147.8	6.64	6.66	107.2	98.7	110.5	100.8	95.5	87.3
Q9UBF2	Coatomer subunit gamma-2 OS=Homo sapiens OX=9606 GN=COPG2 PE=1 SV=1	7	5	6	4	871	97.6	5.81	5.07	88	76.6	149.2	81.2	121.3	83.7
Q9GZM7	Tubulointerstitial nephritis antigen-like OS=Homo sapiens OX=9606 GN=TINAGL1 PE=1 SV=1	16	6	7	6	467	52.4	6.99	6.31	135.7	92.1	96.5	98	77	100.8
P20036	HLA class II histocompatibility antigen, DP alpha 1 chain OS=Homo sapiens OX=9606 GN=HLA-DPA1 PE=1 SV=1	14	3	5	3	260	29.4	5.21	9.85	84.4	78.1	149.9	103.5	87.7	96.3
Q86T13	C-type lectin domain family 14 member A OS=Homo sapiens OX=9606 GN=CLEC14A PE=1 SV=1	12	4	5	4	490	51.6	6.35	7.98	130.1	103.1	86.2	107.2	74.9	98.4
O75306	NADH dehydrogenase [ubiquinone] iron-sulfur protein 2, mitochondrial OS=Homo sapiens OX=9606 GN=NDUFS2 PE=1 SV=2	18	6	7	6	463	52.5	7.55	6.28	98.6	89.1	100.1	96.9	119.1	96.1
Q02318	Sterol 26-hydroxylase, mitochondrial OS=Homo sapiens OX=9606 GN=CYP27A1 PE=1 SV=1	10	5	7	5	531	60.2	8.9	8.48	80.6	129.7	89.5	115.7	79.3	105.2
Q6PIU2	Neutral cholesterol ester hydrolase 1 OS=Homo sapiens OX=9606 GN=NCEH1 PE=1 SV=3	16	6	9	6	408	45.8	7.23	6.85	114.4	95.2	108.8	102.1	86.2	93.4
P12532	Creatine kinase U-type, mitochondrial OS=Homo sapiens OX=9606 GN=CKMT1A PE=1 SV=1	20	6	6	6	417	47	8.34	10.39	141.2	78.4	97.2	69	123	91.2
Q9H082	Ras-related protein Rab-33B OS=Homo sapiens OX=9606 GN=RAB33B PE=1 SV=1	18	4	5	3	229	25.7	7.18	11.03	106.7	102.5	108.1	91	95.5	96.1
Q4V9L6	Transmembrane protein 119 OS=Homo sapiens OX=9606 GN=TMEM119 PE=1 SV=1	17	4	5	4	283	29.2	4.58	10.08	99.7	108.7	91.9	103.9	93.1	102.7
Q16204	Coiled-coil domain-containing protein 6 OS=Homo sapiens OX=9606 GN=CCDC6 PE=1 SV=2	14	6	6	6	474	53.3	7.34	11.13	94.5	98.2	104.9	90.8	116.1	95.6
P15428	15-hydroxyprostaglandin dehydrogenase [NAD(+)] OS=Homo sapiens OX=9606 GN=HPGD PE=1 SV=1	31	7	8	7	266	29	5.86	5.52	111.4	107.2	124.5	88.1	88.4	80.4
Q00059	Transcription factor A, mitochondrial OS=Homo sapiens OX=9606 GN=TFAM PE=1 SV=1	20	6	7	6	246	29.1	9.72	5.83	92.6	92.8	122.2	85.1	118.3	89
O43294	Transforming growth factor beta-1-induced transcript 1 protein OS=Homo sapiens OX=9606 GN=TGFB1I1 PE=1 SV=2	13	5	7	5	461	49.8	7.03	7.75	119.1	121.4	84.5	98.5	85.4	91.1
P48739	Phosphatidylinositol transfer protein beta isoform OS=Homo sapiens OX=9606 GN=PITPNB PE=1 SV=2	28	6	8	6	271	31.5	6.87	9.49	94.4	101.4	99.6	100.4	104.6	99.6
P84103	Serine/arginine-rich splicing factor 3 OS=Homo sapiens OX=9606 GN=SRSF3 PE=1 SV=1	23	4	11	3	164	19.3	11.65	9.33	98.8	77.2	147.6	67	134.4	75.1
Q99436	Proteasome subunit beta type-7 OS=Homo sapiens OX=9606 GN=PSMB7 PE=1 SV=1	14	4	8	4	277	29.9	7.68	14.67	86.2	106	95.1	97.9	118.7	96
Q13724	Mannosyl-oligosaccharide glucosidase OS=Homo sapiens OX=9606 GN=MOGS PE=1 SV=5	7	5	10	5	837	91.9	8.9	9.73	93.3	94.8	106.2	97.5	108.7	99.4
P42766	60S ribosomal protein L35 OS=Homo sapiens OX=9606 GN=RPL35 PE=1 SV=2	33	6	8	6	123	14.5	11.05	11.58	108.8	86.9	111.1	84.1	123.7	85.3
P55001	Microfibrillar-associated protein 2 OS=Homo sapiens OX=9606 GN=MFAP2 PE=2 SV=1	20	4	7	4	183	20.8	4.97	16.9	116.3	82.1	113.6	83.6	98	106.3
P14735	Insulin-degrading enzyme OS=Homo sapiens OX=9606 GN=IDE PE=1 SV=4	8	6	8	6	1019	117.9	6.61	2.33	101.2	104	95.9	88.6	112.9	97.5
Q9Y4F1	FERM, ARHGEF and pleckstrin domain-containing protein 1 OS=Homo sapiens OX=9606 GN=FARP1 PE=1 SV=1	7	6	7	6	1045	118.6	8.15	6.11	122.5	118.1	83.7	99.7	72.1	103.8
O75439	Mitochondrial-processing peptidase subunit beta OS=Homo sapiens OX=9606 GN=PMPCB PE=1 SV=2	13	6	6	6	489	54.3	6.83	11.62	96	86.2	127.4	91.1	104.3	95
P54725	UV excision repair protein RAD23 homolog A OS=Homo sapiens OX=9606 GN=RAD23A PE=1 SV=1	20	6	9	4	363	39.6	4.58	10.31	82.5	99.4	90.8	118.3	73.5	135.5
Q8N8A2	Serine/threonine-protein phosphatase 6 regulatory ankyrin repeat subunit B OS=Homo sapiens OX=9606 GN=ANKRD44 PE=1 SV=3	9	7	7	7	993	107.5	6.3	2.46	88	101.7	106.4	89.9	114.9	99.1
P46776	60S ribosomal protein L27a OS=Homo sapiens OX=9606 GN=RPL27A PE=1 SV=2	41	6	8	6	148	16.6	11	16.18	97.2	91.9	118	89.1	114.8	89
Q06828	Fibromodulin OS=Homo sapiens OX=9606 GN=FMOD PE=1 SV=2	11	3	5	3	376	43.2	6.04	11.71	92.5	102.6	103.2	90.3	103.4	108.1
Q8N1F7	Nuclear pore complex protein Nup93 OS=Homo sapiens OX=9606 GN=NUP93 PE=1 SV=2	9	7	7	7	819	93.4	5.72	6.12	92.7	84.1	130.3	89.9	120	83.1
P49750	YLP motif-containing protein 1 OS=Homo sapiens OX=9606 GN=YLPM1 PE=1 SV=4	3	5	5	5	2146	241.5	6.55	5.63	91.3	101.2	120.9	94.1	104.2	88.3
O75695	Protein XRP2 OS=Homo sapiens OX=9606 GN=RP2 PE=1 SV=4	13	6	6	6	350	39.6	5.12	12.95	109.3	102.4	94.5	97.4	101.1	95.3
Q15428	Splicing factor 3A subunit 2 OS=Homo sapiens OX=9606 GN=SF3A2 PE=1 SV=2	13	4	5	4	464	49.2	9.64	7.15	97.3	86.6	119.6	97.7	108.3	90.5
P07919	Cytochrome b-c1 complex subunit 6, mitochondrial OS=Homo sapiens OX=9606 GN=UQCRH PE=1 SV=2	29	2	3	2	91	10.7	4.44	7.77	97.3	102.3	88.6	113.8	88.3	109.6
P35268	60S ribosomal protein L22 OS=Homo sapiens OX=9606 GN=RPL22 PE=1 SV=2	19	2	7	2	128	14.8	9.19	13.97	100.1	91.1	103.8	94.1	116.7	94.3
Q15057	Arf-GAP with coiled-coil, ANK repeat and PH domain-containing protein 2 OS=Homo sapiens OX=9606 GN=ACAP2 PE=1 SV=3	12	7	8	7	778	88	6.8	4.41	93.2	105.6	88	108.5	93.7	111.1
Q6NUM9	All-trans-retinol 13,14-reductase OS=Homo sapiens OX=9606 GN=RETSAT PE=1 SV=2	13	6	6	6	610	66.8	8.28	5.19	83.9	147.5	85.2	88.9	108.6	85.9
Q71UM5	40S ribosomal protein S27-like OS=Homo sapiens OX=9606 GN=RPS27L PE=1 SV=3	38	3	5	1	84	9.5	9.45	13.35	86.8	87.5	113.8	83.1	133.2	95.6
P22033	Methylmalonyl-CoA mutase, mitochondrial OS=Homo sapiens OX=9606 GN=MMUT PE=1 SV=4	7	7	9	7	750	83.1	6.93	9.62	80.8	81.7	148.4	72.3	139.8	77
Q9NV70	Exocyst complex component 1 OS=Homo sapiens OX=9606 GN=EXOC1 PE=1 SV=4	7	6	7	6	894	101.9	6.61	11.19	112.7	103.4	99.8	90.2	96.4	97.6
P61225	Ras-related protein Rap-2b OS=Homo sapiens OX=9606 GN=RAP2B PE=1 SV=1	23	4	6	3	183	20.5	4.81	11.04	93.8	94.2	97.7	105	106.5	102.8
P16104	Histone H2AX OS=Homo sapiens OX=9606 GN=H2AFX PE=1 SV=2	17	5	18	4	143	15.1	10.74	28.73	103	90.4	119	85.9	121.1	80.6
P46778	60S ribosomal protein L21 OS=Homo sapiens OX=9606 GN=RPL21 PE=1 SV=2	24	6	8	6	160	18.6	10.49	11.82	100.1	85.9	119.2	80.2	131.9	82.7
O75348	V-type proton ATPase subunit G 1 OS=Homo sapiens OX=9606 GN=ATP6V1G1 PE=1 SV=3	35	4	5	4	118	13.7	8.79	12.13	101.2	69.1	114.7	100.4	129.7	84.9
P60033	CD81 antigen OS=Homo sapiens OX=9606 GN=CD81 PE=1 SV=1	12	2	6	2	236	25.8	5.29	13.07	98.5	98	91.2	92.4	113.4	106.6
P02655	Apolipoprotein C-II OS=Homo sapiens OX=9606 GN=APOC2 PE=1 SV=1	29	3	6	3	101	11.3	4.72	8.92	82.3	155.4	64.4	135.3	47.9	114.7
P48449	Lanosterol synthase OS=Homo sapiens OX=9606 GN=LSS PE=1 SV=1	9	6	7	6	732	83.3	6.61	4.92	115.1	117.5	90.5	92.3	87.2	97.5
Q13492	Phosphatidylinositol-binding clathrin assembly protein OS=Homo sapiens OX=9606 GN=PICALM PE=1 SV=2	8	5	6	5	652	70.7	7.9	10.46	108.4	85.2	116.1	90.9	120.7	78.6
Q8WUP2	Filamin-binding LIM protein 1 OS=Homo sapiens OX=9606 GN=FBLIM1 PE=1 SV=2	21	5	6	5	373	40.6	6.02	9.35	94.1	91.8	96.2	102	120.1	95.9
Q96DZ1	Endoplasmic reticulum lectin 1 OS=Homo sapiens OX=9606 GN=ERLEC1 PE=1 SV=1	15	7	8	7	483	54.8	6.28	3.68	86.6	115	102	124.7	103.9	67.7
Q9BT09	Protein canopy homolog 3 OS=Homo sapiens OX=9606 GN=CNPY3 PE=1 SV=1	22	6	9	6	278	30.7	5.49	6.16	89.9	96.1	113.5	104.4	95.2	100.9
P42025	Beta-centractin OS=Homo sapiens OX=9606 GN=ACTR1B PE=1 SV=1	12	4	5	2	376	42.3	6.4	12.86	104.2	93.1	103.9	86	126.9	85.8
P49590	Probable histidine--tRNA ligase, mitochondrial OS=Homo sapiens OX=9606 GN=HARS2 PE=1 SV=1	10	5	8	1	506	56.9	8.24	3.91
P62995	Transformer-2 protein homolog beta OS=Homo sapiens OX=9606 GN=TRA2B PE=1 SV=1	18	5	6	4	288	33.6	11.25	7.35	92.4	85.6	128.5	86.3	130.1	77
P61970	Nuclear transport factor 2 OS=Homo sapiens OX=9606 GN=NUTF2 PE=1 SV=1	45	3	6	3	127	14.5	5.38	6.92	93.2	114.8	109.7	102.3	80.9	99.1
Q96L92	Sorting nexin-27 OS=Homo sapiens OX=9606 GN=SNX27 PE=1 SV=2	10	5	5	5	541	61.2	6.49	10.59	96.5	112.4	84.5	108.5	100.2	97.8
P35914	Hydroxymethylglutaryl-CoA lyase, mitochondrial OS=Homo sapiens OX=9606 GN=HMGCL PE=1 SV=2	16	5	7	5	325	34.3	8.54	13.4	93.4	80.6	164.6	85.7	94.4	81.3
Q9BRP8	Partner of Y14 and mago OS=Homo sapiens OX=9606 GN=PYM1 PE=1 SV=1	33	4	4	4	204	22.6	9.45	8.39	99.1	87.5	108.7	90	112.5	102.2
Q01459	Di-N-acetylchitobiase OS=Homo sapiens OX=9606 GN=CTBS PE=1 SV=1	20	6	6	6	385	43.7	6.64	7.8	115.7	96.3	101.5	93.6	102.2	90.7
Q05655	Protein kinase C delta type OS=Homo sapiens OX=9606 GN=PRKCD PE=1 SV=2	9	7	10	7	676	77.5	7.75	9.02	101.6	92	102.5	90.9	124.1	88.8
Q9H488	GDP-fucose protein O-fucosyltransferase 1 OS=Homo sapiens OX=9606 GN=POFUT1 PE=1 SV=1	13	3	3	3	388	43.9	8.53	9.72	88.3	95.9	105.7	115.9	102.5	91.8
P43353	Aldehyde dehydrogenase family 3 member B1 OS=Homo sapiens OX=9606 GN=ALDH3B1 PE=1 SV=1	12	4	5	3	468	51.8	7.62	4.99	89	96.7	129.5	83	129.9	71.9
P16422	Epithelial cell adhesion molecule OS=Homo sapiens OX=9606 GN=EPCAM PE=1 SV=2	19	6	6	6	314	34.9	7.46	4.76	101.1	85.3	137.2	76.5	120.7	79.2
P28072	Proteasome subunit beta type-6 OS=Homo sapiens OX=9606 GN=PSMB6 PE=1 SV=4	17	4	5	4	239	25.3	4.92	12.03	109.3	96.1	81.6	86.5	131.3	95.2
Q99417	c-Myc-binding protein OS=Homo sapiens OX=9606 GN=MYCBP PE=1 SV=3	55	4	5	4	103	12	5.91	6.81	102.8	104.3	93	105.2	98.6	96.1
O60879	Protein diaphanous homolog 2 OS=Homo sapiens OX=9606 GN=DIAPH2 PE=1 SV=1	9	7	7	7	1101	125.5	6.58	3.28	105.5	103	99.5	100.3	106.8	85
Q9UEY8	Gamma-adducin OS=Homo sapiens OX=9606 GN=ADD3 PE=1 SV=1	12	6	8	6	706	79.1	6.32	9.16	104	109.9	82.3	104.4	93.3	106.1
P16298	Serine/threonine-protein phosphatase 2B catalytic subunit beta isoform OS=Homo sapiens OX=9606 GN=PPP3CB PE=1 SV=2	9	4	5	1	524	59	5.91	6.97
P35612	Beta-adducin OS=Homo sapiens OX=9606 GN=ADD2 PE=1 SV=3	7	5	6	4	726	80.8	5.92	11.35	86.8	121.8	70.3	119.8	76.6	124.7
Q96CT7	Coiled-coil domain-containing protein 124 OS=Homo sapiens OX=9606 GN=CCDC124 PE=1 SV=1	25	6	6	6	223	25.8	9.54	9.48	100.8	91	110.9	93.2	117.9	86.2
Q8N183	NADH dehydrogenase [ubiquinone] 1 alpha subcomplex assembly factor 2 OS=Homo sapiens OX=9606 GN=NDUFAF2 PE=1 SV=1	33	5	6	5	169	19.8	8.97	9.07	88.5	104.8	129.1	93.1	95.1	89.4
O95299	NADH dehydrogenase [ubiquinone] 1 alpha subcomplex subunit 10, mitochondrial OS=Homo sapiens OX=9606 GN=NDUFA10 PE=1 SV=1	14	5	7	5	355	40.7	8.48	6.54	102.6	88.8	112.9	79.9	120.8	94.9
P18859	ATP synthase-coupling factor 6, mitochondrial OS=Homo sapiens OX=9606 GN=ATP5PF PE=1 SV=1	33	4	7	4	108	12.6	9.52	7.99	104.2	86.3	122.3	84.2	117.8	85.2
Q9BXX0	EMILIN-2 OS=Homo sapiens OX=9606 GN=EMILIN2 PE=1 SV=3	7	8	8	8	1053	115.6	6.46	5.33	92.7	85	102.7	112.9	84.7	122.1
P51692	Signal transducer and activator of transcription 5B OS=Homo sapiens OX=9606 GN=STAT5B PE=1 SV=2	9	6	7	6	787	89.8	6.05	8.37	105.4	104.7	101.1	101.3	89.9	97.7
P56537	Eukaryotic translation initiation factor 6 OS=Homo sapiens OX=9606 GN=EIF6 PE=1 SV=1	22	4	6	4	245	26.6	4.68	11.21	100.6	92.8	126.6	84.6	116.4	79
O15305	Phosphomannomutase 2 OS=Homo sapiens OX=9606 GN=PMM2 PE=1 SV=1	26	6	7	6	246	28.1	6.77	6.81	104.7	90.2	124.6	82.8	115.2	82.6
Q9Y6U3	Adseverin OS=Homo sapiens OX=9606 GN=SCIN PE=1 SV=4	12	8	8	8	715	80.4	5.71	4.73	105.6	81.4	124.6	98.4	104.1	86
O75534	Cold shock domain-containing protein E1 OS=Homo sapiens OX=9606 GN=CSDE1 PE=1 SV=2	9	7	8	7	798	88.8	6.25	7.99	101.6	90.5	124	82.2	114.3	87.4
Q9Y6B6	GTP-binding protein SAR1b OS=Homo sapiens OX=9606 GN=SAR1B PE=1 SV=1	21	4	5	1	198	22.4	6.11	8.85
P09936	Ubiquitin carboxyl-terminal hydrolase isozyme L1 OS=Homo sapiens OX=9606 GN=UCHL1 PE=1 SV=2	19	3	3	3	223	24.8	5.48	7.95	75.1	95.5	106.8	117.8	93.7	111.1
Q8N4T8	Carbonyl reductase family member 4 OS=Homo sapiens OX=9606 GN=CBR4 PE=1 SV=3	24	4	4	4	237	25.3	9.33	6.29	88.7	83	146.2	80.5	117.2	84.4
Q9Y3P9	Rab GTPase-activating protein 1 OS=Homo sapiens OX=9606 GN=RABGAP1 PE=1 SV=3	6	5	6	4	1069	121.7	5.25	5.44	97.6	91.3	117.8	94.9	108.5	90
Q9P253	Vacuolar protein sorting-associated protein 18 homolog OS=Homo sapiens OX=9606 GN=VPS18 PE=1 SV=2	7	6	6	6	973	110.1	6.07	9.17	98.4	93.5	110.6	89.3	119.2	89
Q14739	Delta(14)-sterol reductase LBR OS=Homo sapiens OX=9606 GN=LBR PE=1 SV=2	10	7	7	7	615	70.7	9.36	9.59	120	100.8	106.4	99.2	89.5	84.2
Q9BWD1	Acetyl-CoA acetyltransferase, cytosolic OS=Homo sapiens OX=9606 GN=ACAT2 PE=1 SV=2	16	3	3	3	397	41.3	6.92	8.2	86.8	108.9	92.5	113.5	86.9	111.5
Q99961	Endophilin-A2 OS=Homo sapiens OX=9606 GN=SH3GL1 PE=1 SV=1	12	4	6	4	368	41.5	5.43	5.03	107.6	109.4	98.9	98.2	86.3	99.7
O15212	Prefoldin subunit 6 OS=Homo sapiens OX=9606 GN=PFDN6 PE=1 SV=1	44	7	8	7	129	14.6	8.88	8.31	100.7	102	104.8	95.9	106.6	90
P12694	2-oxoisovalerate dehydrogenase subunit alpha, mitochondrial OS=Homo sapiens OX=9606 GN=BCKDHA PE=1 SV=2	16	6	6	6	445	50.4	8.27	5.25	97.4	94.9	132	92.3	100.2	83.3
Q9H0B6	Kinesin light chain 2 OS=Homo sapiens OX=9606 GN=KLC2 PE=1 SV=1	11	5	5	2	622	68.9	7.15	6.14
Q96P70	Importin-9 OS=Homo sapiens OX=9606 GN=IPO9 PE=1 SV=3	4	5	6	5	1041	115.9	4.81	4.87	88.6	80.6	128.7	77.7	144.8	79.5
P07741	Adenine phosphoribosyltransferase OS=Homo sapiens OX=9606 GN=APRT PE=1 SV=2	28	5	9	5	180	19.6	6.02	13.26	95.4	92.8	135.8	84.8	102.3	88.8
P53582	Methionine aminopeptidase 1 OS=Homo sapiens OX=9606 GN=METAP1 PE=1 SV=2	15	5	5	5	386	43.2	7.17	12.03	94.6	80.3	140.2	81.2	123.4	80.3
Q687X5	Metalloreductase STEAP4 OS=Homo sapiens OX=9606 GN=STEAP4 PE=1 SV=1	15	4	4	4	459	51.9	9.29	10.81	79.3	88.9	145.7	76.6	125.5	84
P62330	ADP-ribosylation factor 6 OS=Homo sapiens OX=9606 GN=ARF6 PE=1 SV=2	39	5	5	5	175	20.1	8.95	5.47	106.3	93.7	105.1	102.8	93.2	99
Q9H0A0	RNA cytidine acetyltransferase OS=Homo sapiens OX=9606 GN=NAT10 PE=1 SV=2	8	7	8	7	1025	115.7	8.27	2.07	95.7	106.9	104.4	92.6	102	98.4
Q9H9A6	Leucine-rich repeat-containing protein 40 OS=Homo sapiens OX=9606 GN=LRRC40 PE=1 SV=1	9	5	5	5	602	68.2	6.43	7.77	96.9	96.5	128.1	93.6	92.3	92.6
P58546	Myotrophin OS=Homo sapiens OX=9606 GN=MTPN PE=1 SV=2	35	4	5	4	118	12.9	5.52	11.5	100.7	99.2	118.8	95.2	103.6	82.5
Q53T59	HCLS1-binding protein 3 OS=Homo sapiens OX=9606 GN=HS1BP3 PE=1 SV=1	17	5	5	5	392	42.8	5.01	7.04	103.6	93	99.2	96.9	111.7	95.5
P15927	Replication protein A 32 kDa subunit OS=Homo sapiens OX=9606 GN=RPA2 PE=1 SV=1	24	5	6	5	270	29.2	6.15	9.51	92.3	74.5	149.6	77.2	118.9	87.4
P10153	Non-secretory ribonuclease OS=Homo sapiens OX=9606 GN=RNASE2 PE=1 SV=2	20	3	8	3	161	18.3	8.73	13.08	90.4	130.5	71.3	115.2	75.8	116.8
Q9Y2W2	WW domain-binding protein 11 OS=Homo sapiens OX=9606 GN=WBP11 PE=1 SV=1	7	5	6	5	641	70	8.38	7.9	99.3	83.8	133.8	82.3	115.7	85.2
Q9UQB8	Brain-specific angiogenesis inhibitor 1-associated protein 2 OS=Homo sapiens OX=9606 GN=BAIAP2 PE=1 SV=1	15	7	8	7	552	60.8	8.9	6.51	106.6	107.6	98.3	94.6	106.9	86.1
Q5HYK3	2-methoxy-6-polyprenyl-1,4-benzoquinol methylase, mitochondrial OS=Homo sapiens OX=9606 GN=COQ5 PE=1 SV=2	18	5	6	5	327	37.1	6.95	6.57	91.9	96.8	113.1	91.8	107.9	98.6
Q9UN36	Protein NDRG2 OS=Homo sapiens OX=9606 GN=NDRG2 PE=1 SV=2	17	4	4	4	371	40.8	5.21	4.89	108.3	126	82.9	110.4	86.5	85.9
Q9BXJ9	N-alpha-acetyltransferase 15, NatA auxiliary subunit OS=Homo sapiens OX=9606 GN=NAA15 PE=1 SV=1	8	5	6	5	866	101.2	7.42	6.19	105.6	87.3	117.5	84.2	122.1	83.3
Q8IWB7	WD repeat and FYVE domain-containing protein 1 OS=Homo sapiens OX=9606 GN=WDFY1 PE=1 SV=1	12	4	6	4	410	46.3	7.33	7.63	118.8	85.7	107.6	84	115.1	88.8
Q9BV40	Vesicle-associated membrane protein 8 OS=Homo sapiens OX=9606 GN=VAMP8 PE=1 SV=1	41	5	8	5	100	11.4	7.34	8.24	98.7	100.7	99.2	100.1	111.1	90.2
Q13439	Golgin subfamily A member 4 OS=Homo sapiens OX=9606 GN=GOLGA4 PE=1 SV=1	3	7	7	6	2230	261	5.39	2.03	116.1	85.4	108	87.9	125.8	76.7
O14617	AP-3 complex subunit delta-1 OS=Homo sapiens OX=9606 GN=AP3D1 PE=1 SV=1	6	6	9	6	1153	130.1	8.48	2.24	105	99.5	95.3	100.5	110.1	89.6
O43181	NADH dehydrogenase [ubiquinone] iron-sulfur protein 4, mitochondrial OS=Homo sapiens OX=9606 GN=NDUFS4 PE=1 SV=1	14	2	5	2	175	20.1	10.3	7.71	99.1	84.3	112.8	89.9	126	87.8
[truncated: 3,054 more rows]

## Sheet: Supplementary Table 3B
Accession	Gene Name	Description	Coverage [%]	# Peptides	# PSMs	# Unique Peptides	# AAs	MW [kDa]	calc. pI	Score Sequest HT: Sequest HT	Ca1	Ca2	Ca3	P1	P2	P3	P-value	log2(FC)
Q09666	AHNAK	Neuroblast differentiation-associated protein AHNAK OS=Homo sapiens OX=9606 GN=AHNAK PE=1 SV=2	68	257	726	256	5890	628.7	6.15	1196.36	124.9	76.1	72.8	120.5	107.4	98.4	0.254793	-0.253077
P21333	FLNA	Filamin-A OS=Homo sapiens OX=9606 GN=FLNA PE=1 SV=4	55	121	449	107	2647	280.6	6.06	908.76	113.6	94.5	92.9	102.8	99.9	96.4	0.912744	0.00913558
Q15149	PLEC	Plectin OS=Homo sapiens OX=9606 GN=PLEC PE=1 SV=3	42	195	343	187	4684	531.5	5.96	586.61	119	90.3	92.2	105.9	101.8	90.8	0.900956	0.0144271
P35579	MYH9	Myosin-9 OS=Homo sapiens OX=9606 GN=MYH9 PE=1 SV=4	53	116	413	93	1960	226.4	5.6	767.34	108	104.1	99.2	99.3	97.7	91.7	0.00768327	0.108734
P02768	ALB	Serum albumin OS=Homo sapiens OX=9606 GN=ALB PE=1 SV=2	82	60	2275	60	609	69.3	6.28	4299.65	98.5	63.9	77.9	107.5	114.5	137.7	0.125743	-0.581958
Q13813	SPTAN1	Spectrin alpha chain, non-erythrocytic 1 OS=Homo sapiens OX=9606 GN=SPTAN1 PE=1 SV=3	56	127	275	127	2472	284.4	5.35	522.86	119.1	75.8	83.4	118	105.5	98.3	0.244583	-0.209523
Q9Y490	TLN1	Talin-1 OS=Homo sapiens OX=9606 GN=TLN1 PE=1 SV=3	54	112	245	99	2541	269.6	6.07	451.77	112.5	85.1	90.7	109.4	104.8	97.6	0.357052	-0.11305
Q01082	SPTBN1	Spectrin beta chain, non-erythrocytic 1 OS=Homo sapiens OX=9606 GN=SPTBN1 PE=1 SV=2	50	114	236	108	2364	274.4	5.57	402.38	116	75.2	82	116.6	108.2	102	0.198129	-0.25845
P12111	COL6A3	Collagen alpha-3(VI) chain OS=Homo sapiens OX=9606 GN=COL6A3 PE=1 SV=5	33	98	314	98	3177	343.5	6.68	615.32	115.9	77.3	69.1	113.6	93.9	130.2	0.312902	-0.364524
P35749	MYH11	Myosin-11 OS=Homo sapiens OX=9606 GN=MYH11 PE=1 SV=3	46	97	260	75	1972	227.2	5.5	473.3	122.9	78.3	81.2	122.9	101.2	93.5	0.218183	-0.169471
P35580	MYH10	Myosin-10 OS=Homo sapiens OX=9606 GN=MYH10 PE=1 SV=3	48	100	235	76	1976	228.9	5.54	408.32	109.3	89.2	108	103.3	96.9	93.3	0.574659	0.0625266
P01024	C3	Complement C3 OS=Homo sapiens OX=9606 GN=C3 PE=1 SV=2	49	76	264	76	1663	187	6.4	445.95	86.7	68.4	74.6	115.5	119.8	135.1	0.0380811	-0.689333
O75369	FLNB	Filamin-B OS=Homo sapiens OX=9606 GN=FLNB PE=1 SV=2	42	93	192	81	2602	278	5.73	329.46	97.6	109.9	138.7	91.7	81.4	80.8	0.177674	0.447345
Q14204	DYNC1H1	Cytoplasmic dynein 1 heavy chain 1 OS=Homo sapiens OX=9606 GN=DYNC1H1 PE=1 SV=5	27	115	171	115	4646	532.1	6.4	285.22	105.8	103.1	94.9	101.6	99.7	94.8	0.177446	0.0370374
P04114	APOB	Apolipoprotein B-100 OS=Homo sapiens OX=9606 GN=APOB PE=1 SV=2	25	108	172	108	4563	515.3	7.05	283.85	86.2	71.2	64.5	132.4	135.7	109.9	0.014068	-0.768477
P98160	HSPG2	Basement membrane-specific heparan sulfate proteoglycan core protein OS=Homo sapiens OX=9606 GN=HSPG2 PE=1 SV=4	24	78	178	78	4391	468.5	6.51	328.83	118.8	109.8	78.5	103.2	92.7	97	0.723321	0.0683003
P11277	SPTB	Spectrin beta chain, erythrocytic OS=Homo sapiens OX=9606 GN=SPTB PE=1 SV=5	45	86	146	80	2137	246.3	5.27	264.45	83.4	71.2	66.6	127.1	131.9	119.8	0.00865327	-0.776085
O43707	ACTN4	Alpha-actinin-4 OS=Homo sapiens OX=9606 GN=ACTN4 PE=1 SV=2	60	55	202	39	911	104.8	5.44	360.39	114.7	93.7	102.6	102.7	96.8	89.5	0.295674	0.105845
Q9UPN3	MACF1	Microtubule-actin cross-linking factor 1, isoforms 1/2/3/5 OS=Homo sapiens OX=9606 GN=MACF1 PE=1 SV=4	18	117	139	112	7388	837.8	5.39	195.92	108.4	102.1	86.6	109	100.6	93.2	0.515678	-0.0274166
P02787	TF	Serotransferrin OS=Homo sapiens OX=9606 GN=TF PE=1 SV=3	60	47	280	47	698	77	7.12	571.55	101.9	63	74.8	116.7	110	133.6	0.0923974	-0.587969
P35555	FBN1	Fibrillin-1 OS=Homo sapiens OX=9606 GN=FBN1 PE=1 SV=4	31	70	152	68	2871	312.1	4.93	209.1	119.2	115.9	100.5	80.2	76.4	107.7	0.264568	0.344566
P46940	IQGAP1	Ras GTPase-activating-like protein IQGAP1 OS=Homo sapiens OX=9606 GN=IQGAP1 PE=1 SV=1	38	61	138	61	1657	189.1	6.48	249.44	102.6	119.5	103	92	93.3	89.7	0.0739783	0.241452
P02549	SPTA1	Spectrin alpha chain, erythrocytic 1 OS=Homo sapiens OX=9606 GN=SPTA1 PE=1 SV=5	39	82	144	82	2419	279.8	5.05	226.2	80.1	69.2	63.9	126.2	136.9	123.7	0.0116821	-0.85938
P18206	VCL	Vinculin OS=Homo sapiens OX=9606 GN=VCL PE=1 SV=4	58	63	165	63	1134	123.7	5.66	302.68	116.8	84.6	87.1	110.8	105.4	95.3	0.426368	-0.110661
P02751	FN1	Fibronectin OS=Homo sapiens OX=9606 GN=FN1 PE=1 SV=5	29	56	143	56	2477	272.2	5.5	279.42	101.1	126.4	72.6	96.8	99.4	103.9	1	0
P02545	LMNA	Prelamin-A/C OS=Homo sapiens OX=9606 GN=LMNA PE=1 SV=1	66	46	217	45	664	74.1	7.02	435.89	98.3	115.8	149.2	81.6	73.9	81.3	0.104047	0.617492
P08670	VIM	Vimentin OS=Homo sapiens OX=9606 GN=VIM PE=1 SV=4	62	41	290	35	466	53.6	5.12	538.88	116.1	102.1	95	94	95.8	97	0.339236	0.127039
P01023	A2M	Alpha-2-macroglobulin OS=Homo sapiens OX=9606 GN=A2M PE=1 SV=3	42	51	161	47	1474	163.2	6.46	281.58	77.4	64.5	66.8	113.2	127.6	150.5	0.0482199	-0.906845
Q00610	CLTC	Clathrin heavy chain 1 OS=Homo sapiens OX=9606 GN=CLTC PE=1 SV=5	36	52	136	52	1675	191.5	5.69	244.76	100.7	106.3	113.1	92.3	95.1	92.5	0.0681553	0.193611
Q7Z406	MYH14	Myosin-14 OS=Homo sapiens OX=9606 GN=MYH14 PE=1 SV=2	32	56	123	46	1995	227.7	5.6	221.87	113.4	83.3	97.3	117.1	100.8	88.1	0.655556	-0.0577155
P60709	ACTB	Actin, cytoplasmic 1 OS=Homo sapiens OX=9606 GN=ACTB PE=1 SV=1	61	21	776	7	375	41.7	5.48	1357.52	105.9	100.7	112	92.7	95.9	92.8	0.0971725	0.179124
P69905	HBA1	Hemoglobin subunit alpha OS=Homo sapiens OX=9606 GN=HBA1 PE=1 SV=2	68	12	953	11	142	15.2	8.68	2240.43	74.5	55.8	51.4	124.1	155.8	138.3	0.0347768	-1.20263
O60437	PPL	Periplakin OS=Homo sapiens OX=9606 GN=PPL PE=1 SV=4	42	71	104	71	1756	204.6	5.6	174.09	108.4	108.4	102.2	99.2	93.6	88.2	0.0185301	0.182986
Q9P2E9	RRBP1	Ribosome-binding protein 1 OS=Homo sapiens OX=9606 GN=RRBP1 PE=1 SV=5	57	60	114	60	1410	152.4	8.6	177.34	106.1	118.6	124.6	80.5	81.5	88.7	0.0121084	0.478505
P11021	HSPA5	Endoplasmic reticulum chaperone BiP OS=Homo sapiens OX=9606 GN=HSPA5 PE=1 SV=2	52	35	148	32	654	72.3	5.16	314.16	87.1	140.2	136.1	74.3	81	81.2	0.103744	0.619718
P12814	ACTN1	Alpha-actinin-1 OS=Homo sapiens OX=9606 GN=ACTN1 PE=1 SV=2	48	40	145	23	892	103	5.41	238.86	108.7	96.3	94.2	101.5	101.2	98.1	0.903196	-0.00769439
P07900	HSP90AA1	Heat shock protein HSP 90-alpha OS=Homo sapiens OX=9606 GN=HSP90AA1 PE=1 SV=5	45	34	126	22	732	84.6	5.02	245.19	98.4	127.6	106.2	89.1	91.5	87.2	0.111373	0.310896
P0C0L5	C4B	Complement C4-B OS=Homo sapiens OX=9606 GN=C4B PE=1 SV=2	31	49	110	2	1744	192.6	7.27	203.24	65.3	89.5	75.5	79.1	140.1	150.6	0.120751	-0.683231
P68871	HBB	Hemoglobin subunit beta OS=Homo sapiens OX=9606 GN=HBB PE=1 SV=2	96	17	1642	10	147	16	7.28	3445.62	68.3	52.1	48.9	135.1	154.2	141.5	0.0143244	-1.34744
P02675	FGB	Fibrinogen beta chain OS=Homo sapiens OX=9606 GN=FGB PE=1 SV=2	64	24	125	24	491	55.9	8.27	261.95	79.9	100.2	63.8	99.5	123.3	133.3	0.145577	-0.545993
P0C0L4	C4A	Complement C4-A OS=Homo sapiens OX=9606 GN=C4A PE=1 SV=2	31	49	108	2	1744	192.7	7.08	198.61	86.2	75.8	65.1	117.9	131.1	123.9	0.0293205	-0.715461
P08238	HSP90AB1	Heat shock protein HSP 90-beta OS=Homo sapiens OX=9606 GN=HSP90AB1 PE=1 SV=4	48	37	135	24	724	83.2	5.03	253.87	92.5	133.2	134	77.8	82.1	80.4	0.0869462	0.581958
P00738	HP	Haptoglobin OS=Homo sapiens OX=9606 GN=HP PE=1 SV=1	56	27	166	13	406	45.2	6.58	333.81	67	63.4	70	92.6	133.8	173.1	0.0980084	-0.995313
P22105	TNXB	Tenascin-X OS=Homo sapiens OX=9606 GN=TNXB PE=1 SV=5	25	69	89	69	4244	458.1	5.17	128.23	106.3	87.3	79.5	107.2	105.6	114.1	0.20664	-0.25942
P26038	MSN	Moesin OS=Homo sapiens OX=9606 GN=MSN PE=1 SV=3	50	42	160	31	577	67.8	6.4	292.47	97.6	100.2	133.8	93.7	90.9	83.9	0.284391	0.304522
P55268	LAMB2	Laminin subunit beta-2 OS=Homo sapiens OX=9606 GN=LAMB2 PE=1 SV=2	32	48	90	48	1798	195.9	6.52	162.05	142.2	68	62.5	131.8	106.3	89.3	0.340527	-0.26374
P11142	HSPA8	Heat shock cognate 71 kDa protein OS=Homo sapiens OX=9606 GN=HSPA8 PE=1 SV=1	55	36	155	25	646	70.9	5.52	283.5	96.7	126.5	115.2	86.8	88.3	86.5	0.0912878	0.371367
P62736	ACTA2	Actin, aortic smooth muscle OS=Homo sapiens OX=9606 GN=ACTA2 PE=1 SV=1	55	20	607	3	377	42	5.39	889.61	111.7	96.9	107.7	97	95.9	90.8	0.160535	0.156927
P02671	FGA	Fibrinogen alpha chain OS=Homo sapiens OX=9606 GN=FGA PE=1 SV=2	36	33	138	33	866	94.9	6.01	249.7	76.9	89.6	62.4	103.4	127.5	140.1	0.092672	-0.696702
P14618	PKM	Pyruvate kinase PKM OS=Homo sapiens OX=9606 GN=PKM PE=1 SV=4	64	29	122	29	531	57.9	7.84	204	114.6	118	114.1	82.6	85.7	85	0.00107238	0.452841
P07355	ANXA2	Annexin A2 OS=Homo sapiens OX=9606 GN=ANXA2 PE=1 SV=2	67	28	217	28	339	38.6	7.75	439.06	135.1	74.7	68.2	118	108.7	95.3	0.45627	-0.211976
P08133	ANXA6	Annexin A6 OS=Homo sapiens OX=9606 GN=ANXA6 PE=1 SV=3	59	40	104	40	673	75.8	5.6	201.5	106	91	90.4	105.2	105.8	101.6	0.216832	-0.121258
Q13228	SELENBP1	Methanethiol oxidase OS=Homo sapiens OX=9606 GN=SELENBP1 PE=1 SV=2	55	24	104	24	472	52.4	6.37	228.47	85	99.8	162.3	89.5	83.3	80	0.352305	0.457355
P00558	PGK1	Phosphoglycerate kinase 1 OS=Homo sapiens OX=9606 GN=PGK1 PE=1 SV=3	75	31	134	26	417	44.6	8.1	241.29	98.5	130	103.9	88.7	92.6	86.3	0.119299	0.312842
Q9NZM1	MYOF	Myoferlin OS=Homo sapiens OX=9606 GN=MYOF PE=1 SV=1	31	54	77	53	2061	234.6	6.18	117.73	107.6	93.1	132.9	90.4	85.1	91	0.157712	0.323984
P11047	LAMC1	Laminin subunit gamma-1 OS=Homo sapiens OX=9606 GN=LAMC1 PE=1 SV=3	33	47	87	47	1609	177.5	5.12	144.94	151.2	64.9	63.7	127.5	105.2	87.5	0.55539	-0.194577
P29401	TKT	Transketolase OS=Homo sapiens OX=9606 GN=TKT PE=1 SV=3	52	32	107	32	623	67.8	7.66	202.16	87.8	134.3	149.4	74.8	72.3	81.3	0.111708	0.7018
P16157	ANK1	Ankyrin-1 OS=Homo sapiens OX=9606 GN=ANK1 PE=1 SV=3	28	42	74	40	1881	206.1	6.01	137.44	85.5	68.4	63.9	126.7	133.7	121.7	0.0164869	-0.810946
P12109	COL6A1	Collagen alpha-1(VI) chain OS=Homo sapiens OX=9606 GN=COL6A1 PE=1 SV=3	27	27	123	27	1028	108.5	5.43	238.67	122.7	71	61.2	114.8	100.3	130.1	0.307519	-0.437501
Q92817	EVPL	Envoplakin OS=Homo sapiens OX=9606 GN=EVPL PE=1 SV=3	32	59	69	59	2033	231.5	6.96	123.95	109.9	111.4	103.5	104.5	88.7	82.1	0.0973448	0.238547
P46939	UTRN	Utrophin OS=Homo sapiens OX=9606 GN=UTRN PE=1 SV=2	19	63	79	62	3433	394.2	5.33	126.02	114.9	88	82.8	115.4	102.5	96.3	0.169717	-0.137182
P08729	KRT7	Keratin, type II cytoskeletal 7 OS=Homo sapiens OX=9606 GN=KRT7 PE=1 SV=5	53	31	150	23	469	51.4	5.48	267.71	80.2	126.6	197.6	69.1	55.9	70.6	0.173042	1.04788
O15230	LAMA5	Laminin subunit alpha-5 OS=Homo sapiens OX=9606 GN=LAMA5 PE=1 SV=8	15	44	78	43	3695	399.5	7.02	137.78	137.1	73.8	71.6	123.4	105.3	88.7	0.474879	-0.168051
P0DMV9	HSPA1B	Heat shock 70 kDa protein 1B OS=Homo sapiens OX=9606 GN=HSPA1B PE=1 SV=1	48	30	125	17	641	70	5.66	230.04	91.6	132.9	117.4	90.4	85.4	82.3	0.18099	0.405644
P05787	KRT8	Keratin, type II cytoskeletal 8 OS=Homo sapiens OX=9606 GN=KRT8 PE=1 SV=7	55	35	140	28	483	53.7	5.59	243.09	104.6	119	162.4	75.6	59.8	78.5	0.0687708	0.851664
P07237	P4HB	Protein disulfide-isomerase OS=Homo sapiens OX=9606 GN=P4HB PE=1 SV=3	49	29	105	29	508	57.1	4.87	194.86	86.3	141.5	154.4	68.4	73.1	76.3	0.0990359	0.811324
P78527	PRKDC	DNA-dependent protein kinase catalytic subunit OS=Homo sapiens OX=9606 GN=PRKDC PE=1 SV=3	18	66	89	66	4128	468.8	7.12	99.58	93	127.3	115.9	93.5	84.7	85.6	0.200442	0.349875
Q14764	MVP	Major vault protein OS=Homo sapiens OX=9606 GN=MVP PE=1 SV=4	44	34	96	34	893	99.3	5.48	163.71	85.9	78.7	202.9	78	75.7	78.8	0.373391	0.660514
P22314	UBA1	Ubiquitin-like modifier-activating enzyme 1 OS=Homo sapiens OX=9606 GN=UBA1 PE=1 SV=3	37	34	79	34	1058	117.8	5.76	153.65	98.2	121.3	105.8	94.6	91.3	88.7	0.156884	0.244439
P68133	ACTA1	Actin, alpha skeletal muscle OS=Homo sapiens OX=9606 GN=ACTA1 PE=1 SV=1	55	19	593	1	377	42	5.39	855.6	147.5	63.6	64.4	120.2	115	89.3	0.553099	-0.236166
P02042	HBD	Hemoglobin subunit delta OS=Homo sapiens OX=9606 GN=HBD PE=1 SV=2	82	13	807	6	147	16	8.05	1481.96	77.3	62.8	58.5	130.2	142.8	128.4	0.0134074	-1.01517
P13667	PDIA4	Protein disulfide-isomerase A4 OS=Homo sapiens OX=9606 GN=PDIA4 PE=1 SV=2	49	33	86	33	645	72.9	5.07	145.32	77.3	147.5	147.7	78	73.2	76.2	0.187592	0.712008
Q16555	DPYSL2	Dihydropyrimidinase-related protein 2 OS=Homo sapiens OX=9606 GN=DPYSL2 PE=1 SV=1	53	22	92	19	572	62.3	6.38	187.71	106.8	106.2	96.3	99	101.8	90	0.0245172	0.0889796
Q16787	LAMA3	Laminin subunit alpha-3 OS=Homo sapiens OX=9606 GN=LAMA3 PE=1 SV=2	20	54	72	53	3333	366.4	7.24	89.03	151.1	63.9	55.5	126.8	107.8	94.9	0.466062	-0.28465
P28838	LAP3	Cytosol aminopeptidase OS=Homo sapiens OX=9606 GN=LAP3 PE=1 SV=3	59	26	69	26	519	56.1	7.93	142.75	107	106.5	88	97.8	107.5	93.3	0.843	0.0139438
P00352	ALDH1A1	Retinal dehydrogenase 1 OS=Homo sapiens OX=9606 GN=ALDH1A1 PE=1 SV=2	53	24	73	21	501	54.8	6.73	153.39	104.9	103.6	70.2	101.1	119.9	100.4	0.286	-0.205657
P21980	TGM2	Protein-glutamine gamma-glutamyltransferase 2 OS=Homo sapiens OX=9606 GN=TGM2 PE=1 SV=2	41	28	101	28	687	77.3	5.22	159.26	108.9	84.6	92.2	101.7	107.4	105.2	0.393278	-0.137641
P13796	LCP1	Plastin-2 OS=Homo sapiens OX=9606 GN=LCP1 PE=1 SV=6	50	26	78	22	627	70.2	5.43	138.29	109.4	91.2	95.3	97.6	109.9	96.7	0.783716	-0.0399105
Q05707	COL14A1	Collagen alpha-1(XIV) chain OS=Homo sapiens OX=9606 GN=COL14A1 PE=1 SV=3	26	40	78	40	1796	193.4	5.3	137.8	80.4	71.5	104.8	81.6	90.8	170.8	0.273847	-0.418966
P04406	GAPDH	Glyceraldehyde-3-phosphate dehydrogenase OS=Homo sapiens OX=9606 GN=GAPDH PE=1 SV=3	56	18	138	18	335	36	8.46	256.65	101.7	95.6	115.4	94.5	97.1	95.7	0.302613	0.122221
P06733	ENO1	Alpha-enolase OS=Homo sapiens OX=9606 GN=ENO1 PE=1 SV=2	54	26	153	24	434	47.1	7.39	263.92	80.5	186.8	116.7	70.8	71.5	73.7	0.214228	0.830075
P14625	HSP90B1	Endoplasmin OS=Homo sapiens OX=9606 GN=HSP90B1 PE=1 SV=1	39	32	99	30	803	92.4	4.84	164.41	95.4	120.6	131.2	77.4	85.5	89.8	0.0458881	0.458341
Q86UP2	KTN1	Kinectin OS=Homo sapiens OX=9606 GN=KTN1 PE=1 SV=1	36	47	60	47	1357	156.2	5.64	106.87	100.3	131.9	109.4	89.1	87.1	82.2	0.103715	0.402702
P04040	CAT	Catalase OS=Homo sapiens OX=9606 GN=CAT PE=1 SV=3	54	27	80	27	527	59.7	7.39	150.62	90	64.4	85.5	126	113.4	120.8	0.0121165	-0.586365
P00450	CP	Ceruloplasmin OS=Homo sapiens OX=9606 GN=CP PE=1 SV=1	32	29	80	29	1065	122.1	5.72	166.51	86.3	65.4	74.2	114.8	115.5	143.8	0.0531706	-0.72774
O00468	AGRN	Agrin OS=Homo sapiens OX=9606 GN=AGRN PE=1 SV=6	25	38	59	38	2068	217.2	6.39	96.51	137.7	87.3	74.3	108.7	102.2	89.7	0.979185	-0.00625273
P06396	GSN	Gelsolin OS=Homo sapiens OX=9606 GN=GSN PE=1 SV=1	42	30	90	30	782	85.6	6.28	158.05	119.1	90.5	99.1	97.4	88	106	0.563977	0.0832046
O00159	MYO1C	Unconventional myosin-Ic OS=Homo sapiens OX=9606 GN=MYO1C PE=1 SV=4	36	34	65	34	1063	121.6	9.41	115.66	131.4	60.5	73.3	125.8	117.5	91.6	0.330727	-0.33665
P24821	TNC	Tenascin OS=Homo sapiens OX=9606 GN=TNC PE=1 SV=3	19	37	61	37	2201	240.7	4.89	110.14	119.5	149.4	98	87.8	69.5	75.7	0.129465	0.655057
P55072	VCP	Transitional endoplasmic reticulum ATPase OS=Homo sapiens OX=9606 GN=VCP PE=1 SV=4	41	30	57	30	806	89.3	5.26	121.55	101.9	97.2	109.1	97.5	96.7	97.6	0.231646	0.078887
Q14980	NUMA1	Nuclear mitotic apparatus protein 1 OS=Homo sapiens OX=9606 GN=NUMA1 PE=1 SV=2	26	50	65	49	2115	238.1	5.78	95.28	96.2	121.3	109.1	93.7	91.6	88	0.157321	0.257039
P08727	KRT19	Keratin, type I cytoskeletal 19 OS=Homo sapiens OX=9606 GN=KRT19 PE=1 SV=4	69	31	114	21	400	44.1	5.14	201.06	98.6	115.4	153.1	83.8	67.8	81.3	0.113571	0.656462
Q99715	COL12A1	Collagen alpha-1(XII) chain OS=Homo sapiens OX=9606 GN=COL12A1 PE=1 SV=2	17	43	58	43	3063	332.9	5.53	94.22	136	67.5	58	132	110.9	95.6	0.227678	-0.372345
P02647	APOA1	Apolipoprotein A-I OS=Homo sapiens OX=9606 GN=APOA1 PE=1 SV=1	75	25	154	25	267	30.8	5.76	274.93	79.3	63.3	63.4	108.7	137.7	147.5	0.065366	-0.935185
P15311	EZR	Ezrin OS=Homo sapiens OX=9606 GN=EZR PE=1 SV=4	44	33	91	23	586	69.4	6.27	174.25	126.8	99.4	86.4	107.9	90.2	89.3	0.314341	0.121258
P12110	COL6A2	Collagen alpha-2(VI) chain OS=Homo sapiens OX=9606 GN=COL6A2 PE=1 SV=4	23	23	91	23	1019	108.5	6.21	172.41	108.3	86.2	72.3	98.7	102.3	132.3	0.389217	-0.321063
P01857	IGHG1	Immunoglobulin heavy constant gamma 1 OS=Homo sapiens OX=9606 GN=IGHG1 PE=1 SV=1	54	14	290	8	330	36.1	8.19	568.4	82.1	59.3	85.5	107.1	110.1	155.9	0.065684	-0.717506
P35221	CTNNA1	Catenin alpha-1 OS=Homo sapiens OX=9606 GN=CTNNA1 PE=1 SV=1	44	33	59	33	906	100	6.29	125.02	104.7	111.2	90.5	105.2	97.7	90.7	0.453021	0.0615643
P01876	IGHA1	Immunoglobulin heavy constant alpha 1 OS=Homo sapiens OX=9606 GN=IGHA1 PE=1 SV=2	54	13	92	8	353	37.6	6.51	240.87	88.9	72.1	84.5	103	119.7	131.7	0.0821551	-0.529656
P13639	EEF2	Elongation factor 2 OS=Homo sapiens OX=9606 GN=EEF2 PE=1 SV=4	34	28	67	27	858	95.3	6.83	131.23	99.7	110.4	125.2	87.8	87.3	89.6	0.0751855	0.341094
P04083	ANXA1	Annexin A1 OS=Homo sapiens OX=9606 GN=ANXA1 PE=1 SV=2	65	22	84	22	346	38.7	7.02	157.07	113.6	99.1	101.5	101.7	93.2	91	0.0349836	0.136173
Q9BQE3	TUBA1C	Tubulin alpha-1C chain OS=Homo sapiens OX=9606 GN=TUBA1C PE=1 SV=1	46	20	93	6	449	49.9	5.1	207.03	105	110.5	109.4	97.7	89.6	87.8	0.0704133	0.24004
P09960	LTA4H	Leukotriene A-4 hydrolase OS=Homo sapiens OX=9606 GN=LTA4H PE=1 SV=2	52	26	62	26	611	69.2	6.18	116.81	103	91.4	133.2	86.6	92.5	93.3	0.261471	0.266209
P68104	EEF1A1	Elongation factor 1-alpha 1 OS=Homo sapiens OX=9606 GN=EEF1A1 PE=1 SV=1	42	18	98	18	462	50.1	9.01	217.57	102.9	118.7	129.7	81	84.1	83.6	0.0393132	0.498297
P02679	FGG	Fibrinogen gamma chain OS=Homo sapiens OX=9606 GN=FGG PE=1 SV=3	50	21	78	21	453	51.5	5.62	151.82	76.5	98.5	62.9	96.9	126.7	138.5	0.138419	-0.606033
P68366	TUBA4A	Tubulin alpha-4A chain OS=Homo sapiens OX=9606 GN=TUBA4A PE=1 SV=1	47	20	80	6	448	49.9	5.06	179.96	89.1	103.6	95.1	107.7	104.8	99.8	0.264125	-0.117866
P07437	TUBB	Tubulin beta chain OS=Homo sapiens OX=9606 GN=TUBB PE=1 SV=2	54	17	132	4	444	49.6	4.89	234.64	90.5	111.7	94.9	99.2	107.8	95.9	0.650691	-0.027893
P13797	PLS3	Plastin-3 OS=Homo sapiens OX=9606 GN=PLS3 PE=1 SV=4	45	26	68	21	630	70.8	5.6	124.1	107.3	100	91.2	101.5	102.9	97.1	0.802435	-0.0144271
P05783	KRT18	Keratin, type I cytoskeletal 18 OS=Homo sapiens OX=9606 GN=KRT18 PE=1 SV=2	52	26	91	24	430	48	5.45	161.15	89.3	128.5	183.9	69.7	55.2	73.4	0.12391	1.01843
Q9HBL0	TNS1	Tensin-1 OS=Homo sapiens OX=9606 GN=TNS1 PE=1 SV=2	29	39	61	36	1735	185.6	7.75	94.53	116.7	81.5	79.6	116	108.9	97.3	0.214328	-0.21391
P08603	CFH	Complement factor H OS=Homo sapiens OX=9606 GN=CFH PE=1 SV=4	32	31	58	28	1231	139	6.61	99.74	90	80	78.6	105	118	128.4	0.0785778	-0.499288
Q15746	MYLK	Myosin light chain kinase, smooth muscle OS=Homo sapiens OX=9606 GN=MYLK PE=1 SV=4	21	33	53	33	1914	210.6	6.15	93.01	109.9	88.1	90.1	107.5	101.9	102.5	0.265474	-0.114514
P30101	PDIA3	Protein disulfide-isomerase A3 OS=Homo sapiens OX=9606 GN=PDIA3 PE=1 SV=4	46	24	81	24	505	56.7	6.35	162.03	93.5	139.4	136.6	76.5	77.2	76.9	0.0874037	0.680182
P05091	ALDH2	Aldehyde dehydrogenase, mitochondrial OS=Homo sapiens OX=9606 GN=ALDH2 PE=1 SV=2	45	20	53	17	517	56.3	7.05	107.75	74.8	137.7	119.2	75.1	100.2	93	0.199858	0.306032
P09467	FBP1	Fructose-1,6-bisphosphatase 1 OS=Homo sapiens OX=9606 GN=FBP1 PE=1 SV=5	54	19	60	17	338	36.8	6.99	112.54	103.6	109.8	134.9	78.6	88.7	84.4	0.0730963	0.468625
P07814	EPRS	Bifunctional glutamate/proline--tRNA ligase OS=Homo sapiens OX=9606 GN=EPRS PE=1 SV=5	27	32	47	32	1512	170.5	7.33	78.22	89.6	125.5	124.3	84.4	87.8	88.4	0.130405	0.381149
P50395	GDI2	Rab GDP dissociation inhibitor beta OS=Homo sapiens OX=9606 GN=GDI2 PE=1 SV=2	58	25	52	18	445	50.6	6.47	107.22	96.7	106.9	107.6	98	97.3	93.5	0.244028	0.107771
A6NMZ7	COL6A6	Collagen alpha-6(VI) chain OS=Homo sapiens OX=9606 GN=COL6A6 PE=1 SV=2	15	34	56	32	2263	247	6.89	106.25	118.5	71.7	60.4	115.5	132	101.9	0.221396	-0.479493
P04275	VWF	von Willebrand factor OS=Homo sapiens OX=9606 GN=VWF PE=1 SV=4	18	41	49	41	2813	309.1	5.48	71.45	122.4	80.1	85.1	109.4	95	108.1	0.526039	-0.119793
P02730	SLC4A1	Band 3 anion transport protein OS=Homo sapiens OX=9606 GN=SLC4A1 PE=1 SV=3	21	17	66	17	911	101.7	5.19	157.9	82	65.6	58.3	127	139.8	127.3	0.0199368	-0.936618
P27797	CALR	Calreticulin OS=Homo sapiens OX=9606 GN=CALR PE=1 SV=1	47	19	75	19	417	48.1	4.44	107.57	89.5	124.9	151.5	69.9	79.9	84.3	0.0855817	0.644324
P05023	ATP1A1	Sodium/potassium-transporting ATPase subunit alpha-1 OS=Homo sapiens OX=9606 GN=ATP1A1 PE=1 SV=1	32	30	54	30	1023	112.8	5.49	84.69	94.5	107.2	120.6	97.7	93.6	86.4	0.302999	0.214877
P04075	ALDOA	Fructose-bisphosphate aldolase A OS=Homo sapiens OX=9606 GN=ALDOA PE=1 SV=2	51	21	79	17	364	39.4	8.09	151.88	100	106.4	134.7	85.8	85.1	88	0.10887	0.3978
P49327	FASN	Fatty acid synthase OS=Homo sapiens OX=9606 GN=FASN PE=1 SV=3	19	37	56	37	2511	273.3	6.44	82.67	114.9	86.6	88.6	112.3	100.6	97	0.308537	-0.0952525
P60174	TPI1	Triosephosphate isomerase OS=Homo sapiens OX=9606 GN=TPI1 PE=1 SV=3	57	14	67	14	286	30.8	5.92	160.33	97.3	113.9	129.5	88.5	84.4	86.4	0.112693	0.39388
Q14315	FLNC	Filamin-C OS=Homo sapiens OX=9606 GN=FLNC PE=1 SV=3	13	33	63	17	2725	290.8	5.97	94.54	119.6	78	80.5	120.3	102.2	99.4	0.17666	-0.211009
P35241	RDX	Radixin OS=Homo sapiens OX=9606 GN=RDX PE=1 SV=1	39	30	80	16	583	68.5	6.37	122.55	125.9	63.7	84.5	123.8	107.3	94.8	0.333173	-0.249727
P50454	SERPINH1	Serpin H1 OS=Homo sapiens OX=9606 GN=SERPINH1 PE=1 SV=2	50	17	45	17	418	46.4	8.69	94.27	76.8	149	156.9	69.2	69.5	78.7	0.146164	0.815862
Q8WUM4	PDCD6IP	Programmed cell death 6-interacting protein OS=Homo sapiens OX=9606 GN=PDCD6IP PE=1 SV=1	36	33	51	33	868	96	6.52	87.54	107.6	96.6	103.4	103.2	99.8	89.3	0.415515	0.0736057
P53396	ACLY	ATP-citrate synthase OS=Homo sapiens OX=9606 GN=ACLY PE=1 SV=3	36	34	44	34	1101	120.8	7.33	73.41	102.9	102.5	91.8	106.5	100.8	95.5	0.40513	-0.0269311
P12956	XRCC6	X-ray repair cross-complementing protein 6 OS=Homo sapiens OX=9606 GN=XRCC6 PE=1 SV=2	42	28	57	28	609	69.8	6.64	84.13	92.3	133	119.2	84.8	85.8	84.8	0.126401	0.431745
P00325	ADH1B	All-trans-retinol dehydrogenase [NAD(+)] ADH1B OS=Homo sapiens OX=9606 GN=ADH1B PE=1 SV=2	45	18	116	7	375	39.8	8.29	199.81	119.4	58.4	66.8	120.8	125.1	109.5	0.192389	-0.539019
P68371	TUBB4B	Tubulin beta-4B chain OS=Homo sapiens OX=9606 GN=TUBB4B PE=1 SV=1	54	17	124	3	445	49.8	4.89	219.87	105	111.4	117.3	92.5	88	85.7	0.0554691	0.326041
P02774	GC	Vitamin D-binding protein OS=Homo sapiens OX=9606 GN=GC PE=1 SV=2	51	23	76	23	474	52.9	5.45	132.91	96.2	68.7	74.1	112.3	121.5	127.3	0.0804688	-0.595388
P02788	LTF	Lactotransferrin OS=Homo sapiens OX=9606 GN=LTF PE=1 SV=6	45	26	53	26	710	78.1	8.12	97.33	130.7	65.1	69.5	136.5	87.3	110.9	0.15349	-0.335244
P01009	SERPINA1	Alpha-1-antitrypsin OS=Homo sapiens OX=9606 GN=SERPINA1 PE=1 SV=3	44	21	136	21	418	46.7	5.59	204.38	85.2	62.9	72.8	106.7	126	146.4	0.0802086	-0.779185
P20700	LMNB1	Lamin-B1 OS=Homo sapiens OX=9606 GN=LMNB1 PE=1 SV=2	49	31	60	28	586	66.4	5.16	110.15	84	172.2	115.4	75.6	74.5	78.3	0.211432	0.702188
Q05682	CALD1	Caldesmon OS=Homo sapiens OX=9606 GN=CALD1 PE=1 SV=3	35	23	48	23	793	93.2	5.66	90.59	111.4	96.3	85.3	106.9	105.4	94.7	0.415784	-0.067338
P20810	CAST	Calpastatin OS=Homo sapiens OX=9606 GN=CAST PE=1 SV=4	55	33	59	33	708	76.5	5.07	84.29	105.2	109	99.8	98.3	94	93.6	0.0801212	0.135254
Q9NZN4	EHD2	EH domain-containing protein 2 OS=Homo sapiens OX=9606 GN=EHD2 PE=1 SV=2	52	23	65	21	543	61.1	6.46	128.29	139	54.8	57.7	133.7	121	93.8	0.259115	-0.4706
P06576	ATP5F1B	ATP synthase subunit beta, mitochondrial OS=Homo sapiens OX=9606 GN=ATP5F1B PE=1 SV=3	44	19	61	19	529	56.5	5.4	105.06	96.2	118.6	102.3	97.9	95.1	89.9	0.258394	0.164646
P17661	DES	Desmin OS=Homo sapiens OX=9606 GN=DES PE=1 SV=3	51	26	91	21	470	53.5	5.27	148.59	126.2	64.2	76.9	146.1	101.4	85.2	0.121829	-0.315762
P27816	MAP4	Microtubule-associated protein 4 OS=Homo sapiens OX=9606 GN=MAP4 PE=1 SV=3	29	32	54	32	1152	120.9	5.43	77.71	115.7	96.6	97.7	103.2	97.4	89.4	0.231531	0.0962153
Q06830	PRDX1	Peroxiredoxin-1 OS=Homo sapiens OX=9606 GN=PRDX1 PE=1 SV=1	70	15	94	13	199	22.1	8.13	169.49	85	157.1	101.2	84	91.6	81	0.269799	0.419949
P40926	MDH2	Malate dehydrogenase, mitochondrial OS=Homo sapiens OX=9606 GN=MDH2 PE=1 SV=3	54	15	67	15	338	35.5	8.68	115.54	86.3	152.5	136.8	74.7	75.5	74.2	0.126274	0.743124
P38646	HSPA9	Stress-70 protein, mitochondrial OS=Homo sapiens OX=9606 GN=HSPA9 PE=1 SV=2	43	26	56	26	679	73.6	6.16	99.84	88.9	151.8	115.7	78.3	82.4	82.8	0.159272	0.549576
Q99798	ACO2	Aconitate hydratase, mitochondrial OS=Homo sapiens OX=9606 GN=ACO2 PE=1 SV=2	41	27	45	27	780	85.4	7.61	66.63	97.9	132.1	100.4	88.9	89.4	91.3	0.212532	0.293393
P00915	CA1	Carbonic anhydrase 1 OS=Homo sapiens OX=9606 GN=CA1 PE=1 SV=2	66	13	170	13	261	28.9	7.12	300.2	81.9	55.9	54.3	147.1	135.2	125.6	0.00320572	-1.08636
P10412	H1-4	Histone H1.4 OS=Homo sapiens OX=9606 GN=H1-4 PE=1 SV=2	54	17	164	5	219	21.9	11.03	268.83	112.2	113.2	96.1	102.6	92.1	83.7	0.0534648	0.20766
P53621	COPA	Coatomer subunit alpha OS=Homo sapiens OX=9606 GN=COPA PE=1 SV=2	28	30	40	30	1224	138.3	7.66	74.19	94.7	117	141.4	78.6	82.8	85.5	0.0913773	0.51615
Q8WWI1	LMO7	LIM domain only protein 7 OS=Homo sapiens OX=9606 GN=LMO7 PE=1 SV=3	25	32	52	32	1683	192.6	8.09	68.88	125.7	84.5	79.6	114	104.3	91.9	0.548409	-0.0981411
P00918	CA2	Carbonic anhydrase 2 OS=Homo sapiens OX=9606 GN=CA2 PE=1 SV=2	62	15	62	15	260	29.2	7.4	104.11	73.5	72.1	105.5	106.9	129.3	112.6	0.153261	-0.474138
P01833	PIGR	Polymeric immunoglobulin receptor OS=Homo sapiens OX=9606 GN=PIGR PE=1 SV=4	34	25	63	25	764	83.2	5.74	112.89	93.4	78.1	213.8	74.4	62.3	78.1	0.286326	0.842988
P11216	PYGB	Glycogen phosphorylase, brain form OS=Homo sapiens OX=9606 GN=PYGB PE=1 SV=5	40	30	52	23	843	96.6	6.86	95.43	95.8	104.9	124.4	93.7	89.1	92.1	0.195333	0.241977
P52272	HNRNPM	Heterogeneous nuclear ribonucleoprotein M OS=Homo sapiens OX=9606 GN=HNRNPM PE=1 SV=3	45	30	56	30	730	77.5	8.7	89.87	98.1	121.3	119.7	87.8	87.6	85.5	0.080589	0.378214
P69891	HBG1	Hemoglobin subunit gamma-1 OS=Homo sapiens OX=9606 GN=HBG1 PE=1 SV=2	76	12	76	11	147	16.1	7.2	143.07	86.8	65.2	38.3	168.8	176.9	63.9	0.101477	-1.10594
O43491	EPB41L2	Band 4.1-like protein 2 OS=Homo sapiens OX=9606 GN=EPB41L2 PE=1 SV=1	33	29	48	27	1005	112.5	5.44	79.17	113.6	81.6	77.7	113.2	116.6	97.2	0.220451	-0.260918
P02790	HPX	Hemopexin OS=Homo sapiens OX=9606 GN=HPX PE=1 SV=2	36	15	78	15	462	51.6	7.02	156.14	96.7	73.3	72.2	116	120.3	121.4	0.0571473	-0.562551
P09874	PARP1	Poly [ADP-ribose] polymerase 1 OS=Homo sapiens OX=9606 GN=PARP1 PE=1 SV=4	32	30	44	30	1014	113	8.88	70.15	81.7	139.9	144.8	76.6	77.5	79.5	0.152464	0.649379
P23141	CES1	Liver carboxylesterase 1 OS=Homo sapiens OX=9606 GN=CES1 PE=1 SV=2	43	20	50	20	567	62.5	6.6	96.15	122.3	95.5	71.1	119.3	105	86.8	0.310685	-0.106808
Q01518	CAP1	Adenylyl cyclase-associated protein 1 OS=Homo sapiens OX=9606 GN=CAP1 PE=1 SV=5	40	23	67	21	475	51.9	8.06	130.94	105.2	117.6	104.6	84.9	96.1	91.6	0.0204942	0.264269
P30740	SERPINB1	Leukocyte elastase inhibitor OS=Homo sapiens OX=9606 GN=SERPINB1 PE=1 SV=1	49	19	48	19	379	42.7	6.28	80.29	95	104.4	130.2	95.8	88.6	85.9	0.272177	0.286155
P25705	ATP5F1A	ATP synthase subunit alpha, mitochondrial OS=Homo sapiens OX=9606 GN=ATP5F1A PE=1 SV=1	39	22	55	22	553	59.7	9.13	105.83	100.7	121.6	118	89.7	87.2	82.8	0.0772861	0.389961
P01859	IGHG2	Immunoglobulin heavy constant gamma 2 OS=Homo sapiens OX=9606 GN=IGHG2 PE=1 SV=2	42	11	160	5	326	35.9	7.59	306.06	96.6	56.8	71.5	122	113.7	139.5	0.0591595	-0.738376
P00338	LDHA	L-lactate dehydrogenase A chain OS=Homo sapiens OX=9606 GN=LDHA PE=1 SV=2	39	15	71	14	332	36.7	8.27	121.37	90.8	143.4	125.8	79.1	76.3	84.6	0.129663	0.584963
Q13423	NNT	NAD(P) transhydrogenase, mitochondrial OS=Homo sapiens OX=9606 GN=NNT PE=1 SV=3	28	27	39	27	1086	113.8	8.09	74.7	87.4	140.3	136.4	80.4	76.4	79.1	0.140478	0.626159
P00747	PLG	Plasminogen OS=Homo sapiens OX=9606 GN=PLG PE=1 SV=2	36	28	53	28	810	90.5	7.24	86.08	99	73.7	73.6	110.2	110.7	132.8	0.123002	-0.52211
P21397	MAOA	Amine oxidase [flavin-containing] A OS=Homo sapiens OX=9606 GN=MAOA PE=1 SV=1	35	17	39	12	527	59.6	7.85	76.94	94.3	143.7	102.5	88.9	87.6	83.1	0.216378	0.391364
Q13885	TUBB2A	Tubulin beta-2A chain OS=Homo sapiens OX=9606 GN=TUBB2A PE=1 SV=1	35	13	113	1	445	49.9	4.89	187.85	97.6	90.8	89.2	110	110.4	102.1	0.0232181	-0.216292
Q9Y3Z3	SAMHD1	Deoxynucleoside triphosphate triphosphohydrolase SAMHD1 OS=Homo sapiens OX=9606 GN=SAMHD1 PE=1 SV=2	40	26	48	26	626	72.2	7.14	67.21	107.7	98.1	104	91.6	100.8	97.9	0.353982	0.0937926
P14866	HNRNPL	Heterogeneous nuclear ribonucleoprotein L OS=Homo sapiens OX=9606 GN=HNRNPL PE=1 SV=2	46	18	44	17	589	64.1	8.22	66.53	100	132.7	125.4	78.5	82.3	81.1	0.0478832	0.565952
P31948	STIP1	Stress-induced-phosphoprotein 1 OS=Homo sapiens OX=9606 GN=STIP1 PE=1 SV=1	44	32	47	32	543	62.6	6.8	77.64	95.9	131.2	102.9	89.8	91.6	88.6	0.185731	0.289507
Q9H4M9	EHD1	EH domain-containing protein 1 OS=Homo sapiens OX=9606 GN=EHD1 PE=1 SV=2	42	23	57	16	534	60.6	6.83	90.77	127.6	70.8	70.1	127.7	111.3	92.5	0.214098	-0.304087
P50895	BCAM	Basal cell adhesion molecule OS=Homo sapiens OX=9606 GN=BCAM PE=1 SV=2	44	21	42	21	628	67.4	5.81	66.21	131.4	68.3	60.2	128.8	115.5	95.8	0.217547	-0.388002
P22626	HNRNPA2B1	Heterogeneous nuclear ribonucleoproteins A2/B1 OS=Homo sapiens OX=9606 GN=HNRNPA2B1 PE=1 SV=2	44	18	70	16	353	37.4	8.95	95.99	98	138.8	119.2	80	81.4	82.6	0.0816883	0.544996
P62258	YWHAE	14-3-3 protein epsilon OS=Homo sapiens OX=9606 GN=YWHAE PE=1 SV=1	53	16	68	14	255	29.2	4.74	128.99	105.5	93	107.1	105.2	98.5	90.7	0.62623	0.0538669
P26640	VARS	Valine--tRNA ligase OS=Homo sapiens OX=9606 GN=VARS PE=1 SV=4	23	26	38	26	1264	140.4	7.59	58.02	93.2	116.4	122.1	88.8	90.7	88.7	0.134771	0.30657
Q96KP4	CNDP2	Cytosolic non-specific dipeptidase OS=Homo sapiens OX=9606 GN=CNDP2 PE=1 SV=2	45	16	44	16	475	52.8	5.97	79	105.5	92.2	112.9	97.2	104.5	87.7	0.581461	0.101993
Q86VP6	CAND1	Cullin-associated NEDD8-dissociated protein 1 OS=Homo sapiens OX=9606 GN=CAND1 PE=1 SV=2	23	25	44	25	1230	136.3	5.78	78.82	100.9	100.4	105.4	98.9	100.1	94.3	0.314307	0.0644511
Q03252	LMNB2	Lamin-B2 OS=Homo sapiens OX=9606 GN=LMNB2 PE=1 SV=4	44	30	58	27	620	69.9	5.59	95.23	107.6	100.5	103.1	101.2	93.6	94	0.0121129	0.107771
P09493	TPM1	Tropomyosin alpha-1 chain OS=Homo sapiens OX=9606 GN=TPM1 PE=1 SV=2	56	24	65	11	284	32.7	4.74	94.5	111.1	91.3	110.8	104.8	94.6	87.5	0.376702	0.126536
P16403	H1-2	Histone H1.2 OS=Homo sapiens OX=9606 GN=H1-2 PE=1 SV=2	49	15	152	4	213	21.4	10.93	256.33	111.8	145.1	92.1	81.8	91.5	77.8	0.10377	0.474965
P13010	XRCC5	X-ray repair cross-complementing protein 5 OS=Homo sapiens OX=9606 GN=XRCC5 PE=1 SV=3	34	25	51	25	732	82.7	5.81	91.8	94.5	122.7	115.8	90.2	85.6	91.2	0.147956	0.318682
P63104	YWHAZ	14-3-3 protein zeta/delta OS=Homo sapiens OX=9606 GN=YWHAZ PE=1 SV=1	51	15	58	11	245	27.7	4.79	103.57	114	102.8	108.5	93.4	93.2	88.1	0.043415	0.243914
P50990	CCT8	T-complex protein 1 subunit theta OS=Homo sapiens OX=9606 GN=CCT8 PE=1 SV=4	44	22	41	22	548	59.6	5.6	62.16	99.2	113.1	107.6	93.7	93.1	93.3	0.0879377	0.191679
Q9H4A4	RNPEP	Aminopeptidase B OS=Homo sapiens OX=9606 GN=RNPEP PE=1 SV=2	41	21	39	21	650	72.5	5.74	74.49	87.7	119.7	140.3	80.5	88.4	83.4	0.157019	0.462703
P14550	AKR1A1	Aldo-keto reductase family 1 member A1 OS=Homo sapiens OX=9606 GN=AKR1A1 PE=1 SV=3	66	18	38	18	325	36.6	6.79	63.44	90.7	156.4	101	78.2	87.6	86	0.222579	0.467224
Q14697	GANAB	Neutral alpha-glucosidase AB OS=Homo sapiens OX=9606 GN=GANAB PE=1 SV=3	25	21	50	21	944	106.8	6.14	74.02	93.7	126.1	126.1	83.4	85.8	84.9	0.0947142	0.444959
P23528	CFL1	Cofilin-1 OS=Homo sapiens OX=9606 GN=CFL1 PE=1 SV=3	73	19	66	15	166	18.5	8.09	114.14	111.6	110.5	109.9	88.3	90.2	89.5	0.00211971	0.30895
P30041	PRDX6	Peroxiredoxin-6 OS=Homo sapiens OX=9606 GN=PRDX6 PE=1 SV=3	70	14	57	14	224	25	6.38	119.32	82.9	97.4	130.9	94.7	101.1	93.1	0.676278	0.107272
Q08211	DHX9	ATP-dependent RNA helicase A OS=Homo sapiens OX=9606 GN=DHX9 PE=1 SV=4	25	25	39	25	1270	140.9	6.84	62.86	95.1	122.8	117	89.2	90.2	85.6	0.115869	0.337738
P40939	HADHA	Trifunctional enzyme subunit alpha, mitochondrial OS=Homo sapiens OX=9606 GN=HADHA PE=1 SV=2	32	22	40	22	763	82.9	9.04	79.14	102.8	111.5	105.2	100.1	92.2	88.3	0.129335	0.187301
P49748	ACADVL	Very long-chain specific acyl-CoA dehydrogenase, mitochondrial OS=Homo sapiens OX=9606 GN=ACADVL PE=1 SV=1	38	20	38	20	655	70.3	8.75	55.92	90	91.7	131.6	96.9	94.2	95.6	0.582	0.128003
P34932	HSPA4	Heat shock 70 kDa protein 4 OS=Homo sapiens OX=9606 GN=HSPA4 PE=1 SV=4	43	31	45	30	840	94.3	5.19	64.79	93.2	127.9	105.3	97.4	87.7	88.6	0.304269	0.254046
O43795	MYO1B	Unconventional myosin-Ib OS=Homo sapiens OX=9606 GN=MYO1B PE=1 SV=3	23	27	40	27	1136	131.9	9.38	67.73	107.6	84.3	115.2	106.2	96.6	90	0.705942	0.068793
O75874	IDH1	Isocitrate dehydrogenase [NADP] cytoplasmic OS=Homo sapiens OX=9606 GN=IDH1 PE=1 SV=2	48	21	53	21	414	46.6	7.01	80.31	81.9	125.8	162.5	73.3	78.5	77.9	0.166363	0.688554
Q7KZF4	SND1	Staphylococcal nuclease domain-containing protein 1 OS=Homo sapiens OX=9606 GN=SND1 PE=1 SV=1	32	27	43	27	910	101.9	7.17	74.33	94.6	123.5	129.4	82	83.5	87.1	0.0801633	0.460158
P67936	TPM4	Tropomyosin alpha-4 chain OS=Homo sapiens OX=9606 GN=TPM4 PE=1 SV=3	55	21	85	9	248	28.5	4.69	143.44	114.4	78.1	105.8	108.4	97.1	96.2	0.911245	-0.0163507
Q14195	DPYSL3	Dihydropyrimidinase-related protein 3 OS=Homo sapiens OX=9606 GN=DPYSL3 PE=1 SV=1	36	16	42	14	570	61.9	6.49	89.62	118.2	87.7	75.4	118.5	104.2	96	0.181935	-0.180089
P18669	PGAM1	Phosphoglycerate mutase 1 OS=Homo sapiens OX=9606 GN=PGAM1 PE=1 SV=2	52	14	49	14	254	28.8	7.18	77.53	105.2	100	109.8	98.9	96.2	89.9	0.18363	0.14439
Q02952	AKAP12	A-kinase anchor protein 12 OS=Homo sapiens OX=9606 GN=AKAP12 PE=1 SV=4	24	32	38	32	1782	191.4	4.41	36.74	111.1	61.5	75.7	122.7	106.7	122.3	0.0947736	-0.502261
P01008	SERPINC1	Antithrombin-III OS=Homo sapiens OX=9606 GN=SERPINC1 PE=1 SV=1	38	18	47	18	464	52.6	6.71	67.89	98.4	70.3	70.7	113.5	122.7	124.4	0.0857029	-0.590976
P37837	TALDO1	Transaldolase OS=Homo sapiens OX=9606 GN=TALDO1 PE=1 SV=2	41	17	61	17	337	37.5	6.81	104.03	95.8	130.5	108.6	90.5	88.5	86.2	0.159787	0.33665
Q9H223	EHD4	EH domain-containing protein 4 OS=Homo sapiens OX=9606 GN=EHD4 PE=1 SV=1	46	21	42	16	541	61.1	6.76	79.69	125.1	75.8	75.1	116.9	103.6	103.5	0.317062	-0.231326
P19338	NCL	Nucleolin OS=Homo sapiens OX=9606 GN=NCL PE=1 SV=3	34	28	50	28	710	76.6	4.7	85.24	95.7	141.2	120.2	79.3	80.5	83	0.0967142	0.55656
Q01995	TAGLN	Transgelin OS=Homo sapiens OX=9606 GN=TAGLN PE=1 SV=4	66	14	59	14	201	22.6	8.84	102.26	110.6	87.6	84.6	113.2	109.7	94.4	0.180804	-0.166065
P51659	HSD17B4	Peroxisomal multifunctional enzyme type 2 OS=Homo sapiens OX=9606 GN=HSD17B4 PE=1 SV=3	37	23	42	23	736	79.6	8.84	66.12	109.1	99.8	106.9	102.1	102.8	79.4	0.36266	0.151597
P12270	TPR	Nucleoprotein TPR OS=Homo sapiens OX=9606 GN=TPR PE=1 SV=3	17	37	39	37	2363	267.1	5.02	40.9	95.9	120.2	115.4	90.2	88.3	90	0.116591	0.304087
P32119	PRDX2	Peroxiredoxin-2 OS=Homo sapiens OX=9606 GN=PRDX2 PE=1 SV=5	58	11	90	10	198	21.9	5.97	209.48	77.9	62.9	69.6	129.4	135.8	124.4	0.012175	-0.888859
P09211	GSTP1	Glutathione S-transferase P OS=Homo sapiens OX=9606 GN=GSTP1 PE=1 SV=2	55	9	64	9	210	23.3	5.64	114.47	104.4	105.5	127.2	98.3	88.1	76.4	0.206236	0.359211
Q00839	HNRNPU	Heterogeneous nuclear ribonucleoprotein U OS=Homo sapiens OX=9606 GN=HNRNPU PE=1 SV=6	28	23	56	23	825	90.5	6	86.03	94.9	141	125.9	78.6	80.9	78.7	0.0867371	0.603019
Q9BXM0	PRX	Periaxin OS=Homo sapiens OX=9606 GN=PRX PE=1 SV=2	30	28	43	28	1461	154.8	7.5	69.3	121.4	62.2	63.9	134	125.8	92.7	0.145507	-0.510195
O75083	WDR1	WD repeat-containing protein 1 OS=Homo sapiens OX=9606 GN=WDR1 PE=1 SV=4	43	21	39	21	606	66.2	6.65	88.14	113.2	106.1	102.1	96.8	92.9	88.9	0.00554357	0.206175
P49411	TUFM	Elongation factor Tu, mitochondrial OS=Homo sapiens OX=9606 GN=TUFM PE=1 SV=2	45	19	41	19	452	49.5	7.61	71.33	93.4	136.5	127.7	82.4	80.2	79.7	0.110019	0.561552
Q07157	TJP1	Tight junction protein ZO-1 OS=Homo sapiens OX=9606 GN=TJP1 PE=1 SV=3	21	28	37	28	1748	195.3	6.7	52.3	124.6	79.1	83.4	114.6	104.3	94.1	0.486962	-0.124609
P62937	PPIA	Peptidyl-prolyl cis-trans isomerase A OS=Homo sapiens OX=9606 GN=PPIA PE=1 SV=2	68	14	107	13	165	18	7.81	160.79	94.6	138.4	120.5	83.8	82.5	80.2	0.114359	0.520123
P00734	F2	Prothrombin OS=Homo sapiens OX=9606 GN=F2 PE=1 SV=2	43	24	44	24	622	70	5.9	74.87	90.6	71.7	84.7	108.9	110.4	133.6	0.0592285	-0.514748
Q07065	CKAP4	Cytoskeleton-associated protein 4 OS=Homo sapiens OX=9606 GN=CKAP4 PE=1 SV=2	42	22	40	22	602	66	5.92	54.29	91.7	103.3	145.9	86.6	83.3	89.2	0.217313	0.39584
P14543	NID1	Nidogen-1 OS=Homo sapiens OX=9606 GN=NID1 PE=1 SV=3	21	23	40	22	1247	136.3	5.29	67.23	135.1	76	67.4	124.9	107.6	89	0.373279	-0.207141
Q9Y6N5	SQOR	Sulfide:quinone oxidoreductase, mitochondrial OS=Homo sapiens OX=9606 GN=SQOR PE=1 SV=1	44	20	36	20	450	49.9	9.11	76.62	110.4	123.2	110.2	79.6	88.9	87.7	0.0140573	0.424299
Q16891	IMMT	MICOS complex subunit MIC60 OS=Homo sapiens OX=9606 GN=IMMT PE=1 SV=1	34	24	44	24	758	83.6	6.48	73.72	103.2	119.1	109.8	92	88.2	87.7	0.0641419	0.309923
Q96AC1	FERMT2	Fermitin family homolog 2 OS=Homo sapiens OX=9606 GN=FERMT2 PE=1 SV=1	38	26	43	26	680	77.8	6.7	84.25	121	75.9	75.7	123.6	109.8	94	0.18059	-0.264269
P00739	HPR	Haptoglobin-related protein OS=Homo sapiens OX=9606 GN=HPR PE=2 SV=2	33	15	88	1	348	39	7.09	150.65	82.6	71	55.6	116.4	133.6	140.6	0.0551391	-0.900809
P07951	TPM2	Tropomyosin beta chain OS=Homo sapiens OX=9606 GN=TPM2 PE=1 SV=1	49	19	73	3	284	32.8	4.7	114.63	118.6	86	81.2	116.2	100.9	97	0.252209	-0.136218
P23381	WARS	Tryptophan--tRNA ligase, cytoplasmic OS=Homo sapiens OX=9606 GN=WARS PE=1 SV=2	46	17	40	17	471	53.1	6.23	62.34	120.3	77.6	71.5	115.4	125.3	89.9	0.312037	-0.295337
P23284	PPIB	Peptidyl-prolyl cis-trans isomerase B OS=Homo sapiens OX=9606 GN=PPIB PE=1 SV=2	54	14	60	13	216	23.7	9.41	112.7	88.3	126.1	152.4	73.2	79.7	80.3	0.11401	0.653426
P22897	MRC1	Macrophage mannose receptor 1 OS=Homo sapiens OX=9606 GN=MRC1 PE=1 SV=1	21	28	40	28	1456	165.9	6.54	60.13	106.4	90.8	135.4	82.1	95.1	90.1	0.269156	0.315328
P23246	SFPQ	Splicing factor, proline- and glutamine-rich OS=Homo sapiens OX=9606 GN=SFPQ PE=1 SV=2	29	19	40	18	707	76.1	9.44	78.33	100.2	133.4	122	83.5	81.3	79.6	0.0724692	0.541011
P05556	ITGB1	Integrin beta-1 OS=Homo sapiens OX=9606 GN=ITGB1 PE=1 SV=2	20	17	37	17	798	88.4	5.39	67.44	126	85.7	95.9	103.7	95.9	92.8	0.644955	0.0731122
Q6NZI2	CAVIN1	Caveolae-associated protein 1 OS=Homo sapiens OX=9606 GN=CAVIN1 PE=1 SV=1	31	16	65	16	390	43.5	5.6	91.83	142.2	55.5	54.6	132.2	117.8	97.8	0.278965	-0.463118
P27824	CANX	Calnexin OS=Homo sapiens OX=9606 GN=CANX PE=1 SV=2	35	21	61	21	592	67.5	4.6	68.2	89.9	149.5	121.5	78.3	81.1	79.6	0.131635	0.594589
P16401	H1-5	Histone H1.5 OS=Homo sapiens OX=9606 GN=H1-5 PE=1 SV=3	44	13	65	8	226	22.6	10.92	110.86	91	191.3	104.8	65.4	73.2	74.2	0.192727	0.863208
P37802	TAGLN2	Transgelin-2 OS=Homo sapiens OX=9606 GN=TAGLN2 PE=1 SV=3	54	10	46	10	199	22.4	8.25	92.61	101	106.9	142.4	91.3	77.8	80.6	0.158164	0.488395
P04843	RPN1	Dolichyl-diphosphooligosaccharide--protein glycosyltransferase subunit 1 OS=Homo sapiens OX=9606 GN=RPN1 PE=1 SV=1	39	22	41	22	607	68.5	6.38	88.28	92	122	135.5	81.5	83	86.1	0.105145	0.479906
Q15661	TPSAB1	Tryptase alpha/beta-1 OS=Homo sapiens OX=9606 GN=TPSAB1 PE=1 SV=1	31	9	71	9	275	30.5	7.11	136.07	120.6	93.8	100.3	93.8	122.6	68.8	0.662052	0.142003
P06727	APOA4	Apolipoprotein A-IV OS=Homo sapiens OX=9606 GN=APOA4 PE=1 SV=3	55	22	36	22	396	45.4	5.38	71.15	94	67.7	76.3	110.9	113.9	137.2	0.0855263	-0.605028
P62805	H4C1	Histone H4 OS=Homo sapiens OX=9606 GN=H4C1 PE=1 SV=2	60	9	218	9	103	11.4	11.36	381.68	103.4	112.2	103.1	100.5	92.9	87.8	0.126955	0.180602
Q15084	PDIA6	Protein disulfide-isomerase A6 OS=Homo sapiens OX=9606 GN=PDIA6 PE=1 SV=1	44	17	38	17	440	48.1	5.08	63.67	91.7	131.5	116.3	84.3	90.9	85.3	0.116331	0.382128
P21810	BGN	Biglycan OS=Homo sapiens OX=9606 GN=BGN PE=1 SV=2	38	11	52	10	368	41.6	7.52	130.22	103.7	75.8	77.5	107.3	112.5	123.3	0.1546	-0.416861
Q92841	DDX17	Probable ATP-dependent RNA helicase DDX17 OS=Homo sapiens OX=9606 GN=DDX17 PE=1 SV=2	37	25	41	17	729	80.2	8.27	68.91	92.2	121.2	119.7	89.7	90.3	86.8	0.153224	0.320197
P00367	GLUD1	Glutamate dehydrogenase 1, mitochondrial OS=Homo sapiens OX=9606 GN=GLUD1 PE=1 SV=2	34	18	39	18	558	61.4	7.8	70.48	116.5	101.9	99.4	97.7	93.2	91.3	0.0759385	0.171401
P33176	KIF5B	Kinesin-1 heavy chain OS=Homo sapiens OX=9606 GN=KIF5B PE=1 SV=1	34	30	40	30	963	109.6	6.51	44.44	104.9	112	111	96	88.3	87.8	0.0618098	0.269119
P55786	NPEPPS	Puromycin-sensitive aminopeptidase OS=Homo sapiens OX=9606 GN=NPEPPS PE=1 SV=2	26	23	38	23	919	103.2	5.72	61.53	99.6	106.9	103.1	101.5	96	92.8	0.26287	0.0928609
Q06323	PSME1	Proteasome activator complex subunit 1 OS=Homo sapiens OX=9606 GN=PSME1 PE=1 SV=1	60	16	39	16	249	28.7	6.02	85.08	98	127.7	98.9	90.9	102.1	82.5	0.0920149	0.236611
P01871	IGHM	Immunoglobulin heavy constant mu OS=Homo sapiens OX=9606 GN=IGHM PE=1 SV=4	28	12	52	12	453	49.4	6.77	97.61	89	75.9	60.2	128.5	139.9	106.5	0.020723	-0.73594
P09525	ANXA4	Annexin A4 OS=Homo sapiens OX=9606 GN=ANXA4 PE=1 SV=4	57	18	48	17	319	35.9	6.13	85.79	119.3	100.3	93.6	99.1	96.3	91.3	0.261604	0.127542
P00751	CFB	Complement factor B OS=Homo sapiens OX=9606 GN=CFB PE=1 SV=2	27	22	43	22	764	85.5	7.06	72.47	90.8	76.8	74.4	108.7	131.7	117.6	0.0713156	-0.564953
P07339	CTSD	Cathepsin D OS=Homo sapiens OX=9606 GN=CTSD PE=1 SV=1	39	13	54	13	412	44.5	6.54	71.8	105.3	104.8	109.1	85.5	99.2	96.1	0.089116	0.184918
P07942	LAMB1	Laminin subunit beta-1 OS=Homo sapiens OX=9606 GN=LAMB1 PE=1 SV=2	16	26	35	26	1786	197.9	4.94	59.54	119.1	75.3	87.2	113.4	105.2	99.8	0.355059	-0.177193
P12429	ANXA3	Annexin A3 OS=Homo sapiens OX=9606 GN=ANXA3 PE=1 SV=3	50	19	60	19	323	36.4	5.92	92.7	134.7	70.4	59	137.4	108.6	89.8	0.157665	-0.346518
O43390	HNRNPR	Heterogeneous nuclear ribonucleoprotein R OS=Homo sapiens OX=9606 GN=HNRNPR PE=1 SV=1	37	23	40	17	633	70.9	8.13	56.87	98	132.6	115	84.1	84.6	85.8	0.0912486	0.441438
Q9Y4G6	TLN2	Talin-2 OS=Homo sapiens OX=9606 GN=TLN2 PE=1 SV=4	13	30	44	16	2542	271.4	5.57	65.47	102.5	103.6	109.9	97.4	94.4	92.3	0.101758	0.153526
P06753	TPM3	Tropomyosin alpha-3 chain OS=Homo sapiens OX=9606 GN=TPM3 PE=1 SV=2	47	20	57	8	285	32.9	4.72	79.1	106.3	98.4	124.6	97.3	85.8	87.6	0.156488	0.282708
P07737	PFN1	Profilin-1 OS=Homo sapiens OX=9606 GN=PFN1 PE=1 SV=2	74	11	53	11	140	15	8.27	101.67	108	95.9	114.6	91.5	99	91	0.262424	0.178158
P04792	HSPB1	Heat shock protein beta-1 OS=Homo sapiens OX=9606 GN=HSPB1 PE=1 SV=2	68	15	59	15	205	22.8	6.4	113.58	84	153.3	126.1	77.8	78.2	80.7	0.168511	0.618499
P01860	IGHG3	Immunoglobulin heavy constant gamma 3 OS=Homo sapiens OX=9606 GN=IGHG3 PE=1 SV=2	40	11	176	5	377	41.3	7.9	330.64	87.2	56.3	85.2	110.9	99.5	160.8	0.0882951	-0.69874
P13489	RNH1	Ribonuclease inhibitor OS=Homo sapiens OX=9606 GN=RNH1 PE=1 SV=2	49	16	37	16	461	49.9	4.82	68.91	101.9	100.8	108.5	95.6	95.3	97.9	0.0421576	0.107771
P00390	GSR	Glutathione reductase, mitochondrial OS=Homo sapiens OX=9606 GN=GSR PE=1 SV=2	47	17	32	17	522	56.2	8.5	48.88	88.4	110.7	162.5	78.9	80.6	79	0.203824	0.600405
P10809	HSPD1	60 kDa heat shock protein, mitochondrial OS=Homo sapiens OX=9606 GN=HSPD1 PE=1 SV=2	39	20	41	20	573	61	5.87	70.31	95.2	154.1	112	78.7	78.6	81.4	0.148418	0.597999
Q15075	EEA1	Early endosome antigen 1 OS=Homo sapiens OX=9606 GN=EEA1 PE=1 SV=2	22	29	36	28	1411	162.4	5.68	47.7	103.6	91.7	107.1	101.7	100.1	95.8	0.804946	0.0230836
P36871	PGM1	Phosphoglucomutase-1 OS=Homo sapiens OX=9606 GN=PGM1 PE=1 SV=3	36	20	38	20	562	61.4	6.76	61.87	110.4	95.8	113.5	102	98.6	79.7	0.348962	0.189747
P30043	BLVRB	Flavin reductase (NADPH) OS=Homo sapiens OX=9606 GN=BLVRB PE=1 SV=3	61	9	46	9	206	22.1	7.65	114.68	85.3	77	95.4	109	119.9	113.4	0.0645107	-0.409569
P09429	HMGB1	High mobility group protein B1 OS=Homo sapiens OX=9606 GN=HMGB1 PE=1 SV=3	35	13	52	10	215	24.9	5.74	96.84	104.7	130.4	104.2	88.5	83.9	88.4	0.123602	0.379618
Q1KMD3	HNRNPUL2	Heterogeneous nuclear ribonucleoprotein U-like protein 2 OS=Homo sapiens OX=9606 GN=HNRNPUL2 PE=1 SV=1	28	19	33	19	747	85.1	4.91	56.51	95.7	116.1	122.1	88.6	88.5	89	0.1038	0.327448
P31150	GDI1	Rab GDP dissociation inhibitor alpha OS=Homo sapiens OX=9606 GN=GDI1 PE=1 SV=2	44	16	32	9	447	50.6	5.14	63.42	106.3	105.8	87.2	104.4	101	95.3	0.915849	-0.00673259
Q13510	ASAH1	Acid ceramidase OS=Homo sapiens OX=9606 GN=ASAH1 PE=1 SV=5	39	15	38	15	395	44.6	7.62	72.91	103.2	100.6	116	93.7	99	87.5	0.240031	0.190713
O60716	CTNND1	Catenin delta-1 OS=Homo sapiens OX=9606 GN=CTNND1 PE=1 SV=1	29	23	33	23	968	108.1	6.23	51.77	105.2	102.9	95	109.7	97.7	89.5	0.593493	0.0298168
Q14203	DCTN1	Dynactin subunit 1 OS=Homo sapiens OX=9606 GN=DCTN1 PE=1 SV=3	25	24	29	24	1278	141.6	5.81	52.12	107.7	96	111.2	99.8	97	88.3	0.290368	0.143426
P61978	HNRNPK	Heterogeneous nuclear ribonucleoprotein K OS=Homo sapiens OX=9606 GN=HNRNPK PE=1 SV=1	34	14	41	14	463	50.9	5.54	95.24	99.1	126	115.7	88.9	87.8	82.5	0.0874881	0.39486
P08572	COL4A2	Collagen alpha-2(IV) chain OS=Homo sapiens OX=9606 GN=COL4A2 PE=1 SV=4	9	10	40	10	1712	167.4	8.66	85.97	133.2	82.5	67.2	105.4	112.6	99.1	0.619751	-0.164646
P16402	H1-3	Histone H1.3 OS=Homo sapiens OX=9606 GN=H1-3 PE=1 SV=2	46	15	131	5	221	22.3	11.02	231.1	127.4	115.8	101.4	75.2	95.1	85	0.118682	0.432729
P61158	ACTR3	Actin-related protein 3 OS=Homo sapiens OX=9606 GN=ACTR3 PE=1 SV=3	34	13	44	13	418	47.3	5.88	80.72	105.6	104	104.4	92.4	97	96.5	0.0400943	0.135254
P01834	IGKC	Immunoglobulin kappa constant OS=Homo sapiens OX=9606 GN=IGKC PE=1 SV=2	67	6	73	6	107	11.8	6.52	167.4	81.5	64.2	81.7	106.2	116.4	150.1	0.0628823	-0.712783
Q99536	VAT1	Synaptic vesicle membrane protein VAT-1 homolog OS=Homo sapiens OX=9606 GN=VAT1 PE=1 SV=2	35	11	36	11	393	41.9	6.29	66.72	104.7	86.8	90.8	101	120.3	96.4	0.401793	-0.170436
Q15063	POSTN	Periostin OS=Homo sapiens OX=9606 GN=POSTN PE=1 SV=2	27	19	31	19	836	93.3	7.53	66.86	78.7	85.4	90.8	91.2	122.8	131.2	0.0765263	-0.437501
P48681	NES	Nestin OS=Homo sapiens OX=9606 GN=NES PE=1 SV=2	21	27	33	27	1621	177.3	4.36	42.46	114	76.8	79.1	119.4	107.7	103	0.118656	-0.290478
P16615	ATP2A2	Sarcoplasmic/endoplasmic reticulum calcium ATPase 2 OS=Homo sapiens OX=9606 GN=ATP2A2 PE=1 SV=1	24	22	34	17	1042	114.7	5.34	59.65	97.2	113.4	124	87.1	89.3	89.1	0.084948	0.333726
Q15181	PPA1	Inorganic pyrophosphatase OS=Homo sapiens OX=9606 GN=PPA1 PE=1 SV=2	61	15	30	15	289	32.6	5.86	64.64	91.9	100.7	158.8	77.9	87.1	83.7	0.235854	0.498708
P01042	KNG1	Kininogen-1 OS=Homo sapiens OX=9606 GN=KNG1 PE=1 SV=2	28	18	42	18	644	71.9	6.81	70.46	91.5	66.2	73.9	118.8	118.8	130.8	0.0386434	-0.669638
P48643	CCT5	T-complex protein 1 subunit epsilon OS=Homo sapiens OX=9606 GN=CCT5 PE=1 SV=1	35	20	32	19	541	59.6	5.66	60.22	98.1	110.3	104.5	92.3	97.1	97.6	0.0644819	0.124651
Q9NZU5	LMCD1	LIM and cysteine-rich domains protein 1 OS=Homo sapiens OX=9606 GN=LMCD1 PE=1 SV=1	55	19	31	19	365	40.8	7.93	48.37	112.3	107.5	88.1	107.1	98.9	86	0.10588	0.0764935
P55084	HADHB	Trifunctional enzyme subunit beta, mitochondrial OS=Homo sapiens OX=9606 GN=HADHB PE=1 SV=3	31	16	38	16	474	51.3	9.41	60.68	104.5	110.6	109.7	89.2	93.1	92.9	0.001537	0.239071
O95810	CAVIN2	Caveolae-associated protein 2 OS=Homo sapiens OX=9606 GN=CAVIN2 PE=1 SV=3	27	12	37	12	425	47.1	5.21	77.22	132.1	66.2	65.5	122.4	117.4	96.5	0.309667	-0.350304
P30086	PEBP1	Phosphatidylethanolamine-binding protein 1 OS=Homo sapiens OX=9606 GN=PEBP1 PE=1 SV=3	79	10	44	10	187	21	7.53	89.3	101.2	104.2	114.7	98.4	93.3	88.3	0.19328	0.193096
P54652	HSPA2	Heat shock-related 70 kDa protein 2 OS=Homo sapiens OX=9606 GN=HSPA2 PE=1 SV=1	27	15	54	5	639	70	5.74	90.31	105.6	76.8	83	130.8	113.1	90.8	0.108361	-0.3347
P55196	AFDN	Afadin OS=Homo sapiens OX=9606 GN=AFDN PE=1 SV=3	19	31	39	31	1824	206.7	6.47	36.58	111.8	106.9	87.6	107.4	95.3	91	0.434494	0.0606021
Q15582	TGFBI	Transforming growth factor-beta-induced protein ig-h3 OS=Homo sapiens OX=9606 GN=TGFBI PE=1 SV=1	35	19	35	19	683	74.6	7.71	63.77	109.4	121.4	81.3	97.4	91.2	99.3	0.623895	0.116441
Q92499	DDX1	ATP-dependent RNA helicase DDX1 OS=Homo sapiens OX=9606 GN=DDX1 PE=1 SV=2	36	22	32	22	740	82.4	7.23	45.11	101	120.2	116.4	87.5	83.9	91	0.0625817	0.363547
P04003	C4BPA	C4b-binding protein alpha chain OS=Homo sapiens OX=9606 GN=C4BPA PE=1 SV=2	31	15	25	15	597	67	7.3	44.58	76.2	81.3	144	88.6	101.6	108.2	0.95836	0.0149105
P51884	LUM	Lumican OS=Homo sapiens OX=9606 GN=LUM PE=1 SV=2	33	9	63	9	338	38.4	6.61	122.32	102.3	60.8	74.6	106.6	98.9	156.8	0.206881	-0.608043
P49368	CCT3	T-complex protein 1 subunit gamma OS=Homo sapiens OX=9606 GN=CCT3 PE=1 SV=4	46	20	37	20	545	60.5	6.49	58.35	96.5	116.6	105.3	95.1	92.8	93.7	0.198651	0.177193
P27348	YWHAQ	14-3-3 protein theta OS=Homo sapiens OX=9606 GN=YWHAQ PE=1 SV=1	43	14	45	9	245	27.7	4.78	72.15	99.4	119.5	117.8	89.1	88.2	86.1	0.0744485	0.354208
Q14103	HNRNPD	Heterogeneous nuclear ribonucleoprotein D0 OS=Homo sapiens OX=9606 GN=HNRNPD PE=1 SV=1	42	18	43	17	355	38.4	7.81	60.6	94.3	133.4	132.5	80.4	78.4	80.9	0.0927869	0.587568
Q10567	AP1B1	AP-1 complex subunit beta-1 OS=Homo sapiens OX=9606 GN=AP1B1 PE=1 SV=2	22	17	23	8	949	104.6	5.06	44.41	94.8	98.1	103.2	97.1	109.3	97.5	0.64751	-0.0375122
P02452	COL1A1	Collagen alpha-1(I) chain OS=Homo sapiens OX=9606 GN=COL1A1 PE=1 SV=5	15	21	45	21	1464	138.9	5.8	68.85	129.8	73.6	79.8	79.9	75.5	161.4	0.797224	-0.161751
P07195	LDHB	L-lactate dehydrogenase B chain OS=Homo sapiens OX=9606 GN=LDHB PE=1 SV=2	41	15	51	14	334	36.6	6.05	102.09	104.7	98.9	123.1	90.2	90.7	92.3	0.117886	0.258009
P19971	TYMP	Thymidine phosphorylase OS=Homo sapiens OX=9606 GN=TYMP PE=1 SV=2	33	12	22	12	482	49.9	5.53	51.89	91.8	114.7	86.8	89.9	124.6	92.3	0.321265	-0.0649214
P06702	S100A9	Protein S100-A9 OS=Homo sapiens OX=9606 GN=S100A9 PE=1 SV=1	70	7	83	7	114	13.2	6.13	120.72	122.9	53.5	68.3	145.5	94.8	115	0.0370594	-0.538024
P07910	HNRNPC	Heterogeneous nuclear ribonucleoproteins C1/C2 OS=Homo sapiens OX=9606 GN=HNRNPC PE=1 SV=4	29	13	35	13	306	33.7	5.08	58.96	95.6	136.3	121	82.8	81.7	82.6	0.101279	0.514164
P31146	CORO1A	Coronin-1A OS=Homo sapiens OX=9606 GN=CORO1A PE=1 SV=4	33	16	39	16	461	51	6.68	70.86	111	93.2	101.1	103.1	94	97.7	0.298173	0.0504911
Q9Y2D5	AKAP2	A-kinase anchor protein 2 OS=Homo sapiens OX=9606 GN=AKAP2 PE=1 SV=3	27	22	33	22	859	94.6	5.11	33.3	125.3	69.2	70.5	132	109.5	93.5	0.137964	-0.338169
P11766	ADH5	Alcohol dehydrogenase class-3 OS=Homo sapiens OX=9606 GN=ADH5 PE=1 SV=4	33	13	48	13	374	39.7	7.49	78.81	94.9	128.8	116.4	89.3	86.8	83.8	0.133889	0.388002
Q9Y4L1	HYOU1	Hypoxia up-regulated protein 1 OS=Homo sapiens OX=9606 GN=HYOU1 PE=1 SV=1	21	20	34	20	999	111.3	5.22	45.18	89.5	135.8	128.2	78.6	84.7	83.3	0.104116	0.519537
Q96AE4	FUBP1	Far upstream element-binding protein 1 OS=Homo sapiens OX=9606 GN=FUBP1 PE=1 SV=3	37	19	36	15	644	67.5	7.61	63.79	95.2	139.2	109.5	86.6	83.4	86.1	0.170571	0.425282
Q16853	AOC3	Membrane primary amine oxidase OS=Homo sapiens OX=9606 GN=AOC3 PE=1 SV=3	17	12	36	12	763	84.6	6.52	87.64	119.6	72.5	75.4	120.2	110.7	101.5	0.190168	-0.313381
P05164	MPO	Myeloperoxidase OS=Homo sapiens OX=9606 GN=MPO PE=1 SV=1	34	20	35	17	745	83.8	8.97	57.58	114.9	64.2	70.7	128	102	120.3	0.0894374	-0.487818
Q15233	NONO	Non-POU domain-containing octamer-binding protein OS=Homo sapiens OX=9606 GN=NONO PE=1 SV=4	42	18	39	16	471	54.2	8.95	57.01	91.8	134	120.3	85.3	86.2	82.4	0.132291	0.446929
P12277	CKB	Creatine kinase B-type OS=Homo sapiens OX=9606 GN=CKB PE=1 SV=1	48	14	24	13	381	42.6	5.59	47.67	109.4	88.8	91.6	112.8	100.7	96.7	0.120117	-0.0981411
P53618	COPB1	Coatomer subunit beta OS=Homo sapiens OX=9606 GN=COPB1 PE=1 SV=3	24	20	37	20	953	107.1	6.05	54.89	95.6	110.6	129.5	88.8	86.4	89	0.133978	0.345542
P35606	COPB2	Coatomer subunit beta' OS=Homo sapiens OX=9606 GN=COPB2 PE=1 SV=2	29	22	32	22	906	102.4	5.27	47.76	97	113.1	135.3	83.9	82.5	88.1	0.0913375	0.440602
Q02218	OGDH	2-oxoglutarate dehydrogenase, mitochondrial OS=Homo sapiens OX=9606 GN=OGDH PE=1 SV=3	25	25	31	25	1023	115.9	6.86	40.5	97.6	125.3	118.6	87.6	83.8	87	0.0966553	0.40228
P11171	EPB41	Protein 4.1 OS=Homo sapiens OX=9606 GN=EPB41 PE=1 SV=4	26	19	39	17	864	97	5.58	47.21	82.1	85.9	78.7	117.5	123.6	112.2	0.00116573	-0.518136
P17655	CAPN2	Calpain-2 catalytic subunit OS=Homo sapiens OX=9606 GN=CAPN2 PE=1 SV=6	25	17	39	17	700	79.9	4.98	65.22	108.8	111	116	93	87.5	83.8	0.0373101	0.345426
Q6P2Q9	PRPF8	Pre-mRNA-processing-splicing factor 8 OS=Homo sapiens OX=9606 GN=PRPF8 PE=1 SV=2	11	26	34	26	2335	273.4	8.84	48.66	97	113.4	117	92.4	88.1	92.1	0.116104	0.264269
Q92616	GCN1	eIF-2-alpha kinase activator GCN1 OS=Homo sapiens OX=9606 GN=GCN1 PE=1 SV=6	10	26	32	26	2671	292.6	7.47	35.83	102.1	101.3	123.1	91.8	88.5	93.3	0.102475	0.255015
Q9Y3I0	RTCB	RNA-splicing ligase RtcB homolog OS=Homo sapiens OX=9606 GN=RTCB PE=1 SV=1	40	18	35	18	505	55.2	7.23	62.73	102	113.1	112.6	93.7	89.1	89.5	0.0682823	0.267179
Q13200	PSMD2	26S proteasome non-ATPase regulatory subunit 2 OS=Homo sapiens OX=9606 GN=PSMD2 PE=1 SV=3	23	21	26	21	908	100.1	5.2	38.05	98.5	114.6	117.1	90.9	89.2	89.7	0.0853775	0.29145
Q93052	LPP	Lipoma-preferred partner OS=Homo sapiens OX=9606 GN=LPP PE=1 SV=1	39	16	33	16	612	65.7	7.37	48.9	115.1	94.1	97.5	97.1	100.5	95.7	0.596817	0.0644511
P63010	AP2B1	AP-2 complex subunit beta OS=Homo sapiens OX=9606 GN=AP2B1 PE=1 SV=1	27	20	26	11	937	104.5	5.38	43.51	99.6	100.2	105.4	99	101.1	94.7	0.441683	0.0500184
P51858	HDGF	Hepatoma-derived growth factor OS=Homo sapiens OX=9606 GN=HDGF PE=1 SV=1	58	15	36	14	240	26.8	4.73	62.53	90.6	122	166.1	75.2	71.2	74.9	0.138819	0.775052
P49189	ALDH9A1	4-trimethylaminobutyraldehyde dehydrogenase OS=Homo sapiens OX=9606 GN=ALDH9A1 PE=1 SV=3	31	15	40	15	494	53.8	5.87	67.9	90.6	119.1	148.9	81.2	81.1	79	0.154672	0.571548
Q9UPQ0	LIMCH1	LIM and calponin homology domains-containing protein 1 OS=Homo sapiens OX=9606 GN=LIMCH1 PE=1 SV=4	26	25	31	25	1083	121.8	6.47	47.69	117.3	92	83.3	116.1	100.4	90.9	0.24988	-0.0711874
Q02818	NUCB1	Nucleobindin-1 OS=Homo sapiens OX=9606 GN=NUCB1 PE=1 SV=4	46	18	27	18	461	53.8	5.25	48.28	103.2	98.5	124.9	94.6	91.7	87.1	0.219596	0.256512
P04264	KRT1	Keratin, type II cytoskeletal 1 OS=Homo sapiens OX=9606 GN=KRT1 PE=1 SV=6	35	22	35	17	644	66	8.12	44.95	153.2	77	75.5	90.4	80.5	123.3	0.915955	0.0553193
O75367	H2AFY	Core histone macro-H2A.1 OS=Homo sapiens OX=9606 GN=H2AFY PE=1 SV=4	33	10	31	10	372	39.6	9.79	63.26	87.5	126.4	111.7	89.3	91.7	93.5	0.247855	0.246295
P06744	GPI	Glucose-6-phosphate isomerase OS=Homo sapiens OX=9606 GN=GPI PE=1 SV=4	31	17	40	17	558	63.1	8.32	82.13	96.8	96.7	127	92.2	92.6	94.8	0.279728	0.19696
P42704	LRPPRC	Leucine-rich PPR motif-containing protein, mitochondrial OS=Homo sapiens OX=9606 GN=LRPPRC PE=1 SV=3	18	24	29	24	1394	157.8	6.13	42.72	88.5	140.1	125.9	82.3	79.3	83.9	0.151365	0.530063
Q00341	HDLBP	Vigilin OS=Homo sapiens OX=9606 GN=HDLBP PE=1 SV=2	26	29	32	29	1268	141.4	6.87	35.75	99	111	135.6	83.3	83.5	87.6	0.0843401	0.442005
P48735	IDH2	Isocitrate dehydrogenase [NADP], mitochondrial OS=Homo sapiens OX=9606 GN=IDH2 PE=1 SV=2	42	18	32	18	452	50.9	8.69	62.13	82.9	150.3	136.4	74.1	78.7	77.6	0.136458	0.681824
P07384	CAPN1	Calpain-1 catalytic subunit OS=Homo sapiens OX=9606 GN=CAPN1 PE=1 SV=1	29	20	31	20	714	81.8	5.67	61.94	107.3	81.3	97.8	111.5	99.6	102.5	0.188641	-0.130894
P21291	CSRP1	Cysteine and glycine-rich protein 1 OS=Homo sapiens OX=9606 GN=CSRP1 PE=1 SV=3	69	13	30	13	193	20.6	8.57	56.25	119.7	90.6	96.3	100.6	103.2	89.5	0.678319	0.0639806
Q562R1	ACTBL2	Beta-actin-like protein 2 OS=Homo sapiens OX=9606 GN=ACTBL2 PE=1 SV=2	19	8	263	1	376	42	5.59	403.15	107.5	96.3	103.3	98.2	98.7	96	0.320426	0.0683003
Q9C0C2	TNKS1BP1	182 kDa tankyrase-1-binding protein OS=Homo sapiens OX=9606 GN=TNKS1BP1 PE=1 SV=4	18	26	28	26	1729	181.7	4.86	35.52	102.1	111.1	101.6	102	92.4	90.9	0.209479	0.141956
O95782	AP2A1	AP-2 complex subunit alpha-1 OS=Homo sapiens OX=9606 GN=AP2A1 PE=1 SV=3	27	25	33	18	977	107.5	7.03	44.42	103.5	95.2	105.2	96.5	98.5	101.1	0.485795	0.0375122
Q07954	LRP1	Prolow-density lipoprotein receptor-related protein 1 OS=Homo sapiens OX=9606 GN=LRP1 PE=1 SV=2	6	25	30	25	4544	504.3	5.39	41.43	102.5	98.2	108.2	93.2	99.6	98.4	0.247639	0.0851295
P49419	ALDH7A1	Alpha-aminoadipic semialdehyde dehydrogenase OS=Homo sapiens OX=9606 GN=ALDH7A1 PE=1 SV=5	32	15	22	15	539	58.5	7.99	47.25	93.4	163.5	97.4	86	83.9	75.9	0.243301	0.527487
P00326	ADH1C	Alcohol dehydrogenase 1C OS=Homo sapiens OX=9606 GN=ADH1C PE=1 SV=2	27	13	61	2	375	39.8	8.29	110.9	69.5	101.5	174.2	99.1	75.8	80	0.48903	0.437501
P00488	F13A1	Coagulation factor XIII A chain OS=Homo sapiens OX=9606 GN=F13A1 PE=1 SV=4	25	15	27	15	732	83.2	6.09	53.41	100.1	111.1	108	85.1	91.2	104.6	0.120808	0.184404
P16152	CBR1	Carbonyl reductase [NADPH] 1 OS=Homo sapiens OX=9606 GN=CBR1 PE=1 SV=3	54	11	21	9	277	30.4	8.32	54	102.3	108.5	107.6	95.2	99.4	87	0.100226	0.177193
O60814	H2BC12	Histone H2B type 1-K OS=Homo sapiens OX=9606 GN=H2BC12 PE=1 SV=3	65	10	222	2	126	13.9	10.32	292.27	101.9	114	105.4	96.6	92.5	89.6	0.0958531	0.205208
Q9Y696	CLIC4	Chloride intracellular channel protein 4 OS=Homo sapiens OX=9606 GN=CLIC4 PE=1 SV=4	62	15	27	15	253	28.8	5.59	44.68	111.1	101.7	94.9	102.4	99.6	90.2	0.114748	0.0745683
P11586	MTHFD1	C-1-tetrahydrofolate synthase, cytoplasmic OS=Homo sapiens OX=9606 GN=MTHFD1 PE=1 SV=3	21	20	28	20	935	101.5	7.3	48	87.4	131.3	115.6	82.9	92.2	90.6	0.15057	0.331345
P42224	STAT1	Signal transducer and activator of transcription 1-alpha/beta OS=Homo sapiens OX=9606 GN=STAT1 PE=1 SV=2	25	17	30	17	750	87.3	6.05	40.25	88.2	121.8	78.7	93.4	131.8	85.9	0.0330445	-0.107807
P52209	PGD	6-phosphogluconate dehydrogenase, decarboxylating OS=Homo sapiens OX=9606 GN=PGD PE=1 SV=3	30	13	37	13	483	53.1	7.23	65.94	90.8	136	108.5	87.8	91.4	85.5	0.189174	0.341094
P40925	MDH1	Malate dehydrogenase, cytoplasmic OS=Homo sapiens OX=9606 GN=MDH1 PE=1 SV=4	43	14	41	14	334	36.4	7.36	61.48	95.1	106.1	113	90.9	98.3	96.5	0.121387	0.137182
P60660	MYL6	Myosin light polypeptide 6 OS=Homo sapiens OX=9606 GN=MYL6 PE=1 SV=2	67	10	47	7	151	16.9	4.65	89.42	109.7	95.9	94.8	105.6	103	91.1	0.95507	0.00336573
P23396	RPS3	40S ribosomal protein S3 OS=Homo sapiens OX=9606 GN=RPS3 PE=1 SV=2	68	16	45	16	243	26.7	9.66	68.35	96.3	115.7	130.7	84.5	85.3	87.6	0.0887829	0.412934
Q9Y678	COPG1	Coatomer subunit gamma-1 OS=Homo sapiens OX=9606 GN=COPG1 PE=1 SV=1	23	17	27	16	874	97.7	5.47	41.3	101.2	109	138.3	83	81.1	87.3	0.0796911	0.471174
P19823	ITIH2	Inter-alpha-trypsin inhibitor heavy chain H2 OS=Homo sapiens OX=9606 GN=ITIH2 PE=1 SV=2	23	21	35	21	946	106.4	6.86	59.34	73.9	75	84.6	95.7	127.2	143.6	0.060563	-0.650391
P30153	PPP2R1A	Serine/threonine-protein phosphatase 2A 65 kDa regulatory subunit A alpha isoform OS=Homo sapiens OX=9606 GN=PPP2R1A PE=1 SV=4	34	16	26	15	589	65.3	5.11	53.15	98.1	101.9	114.1	97.9	95.5	92.5	0.277322	0.135713
Q16363	LAMA4	Laminin subunit alpha-4 OS=Homo sapiens OX=9606 GN=LAMA4 PE=1 SV=4	16	24	30	24	1823	202.4	6.28	44.96	127.8	61.3	59.6	137.9	112.2	101.1	0.109376	-0.497886
Q96QK1	VPS35	Vacuolar protein sorting-associated protein 35 OS=Homo sapiens OX=9606 GN=VPS35 PE=1 SV=2	26	18	27	18	796	91.6	5.49	54.34	108.8	104.9	104.1	96.3	96.2	89.8	0.0189064	0.17089
Q9UM54	MYO6	Unconventional myosin-VI OS=Homo sapiens OX=9606 GN=MYO6 PE=1 SV=4	20	22	29	22	1294	149.6	8.53	33.68	98.5	123.6	114.3	92.3	85.2	86	0.125025	0.352375
P60842	EIF4A1	Eukaryotic initiation factor 4A-I OS=Homo sapiens OX=9606 GN=EIF4A1 PE=1 SV=1	36	14	28	7	406	46.1	5.48	53.99	104.6	98.3	134.8	81	93.7	87.6	0.178193	0.364524
P23526	AHCY	Adenosylhomocysteinase OS=Homo sapiens OX=9606 GN=AHCY PE=1 SV=4	34	14	27	13	432	47.7	6.34	48.55	93.2	124.4	106	91.2	98	87.1	0.160496	0.227976
Q9NSE4	IARS2	Isoleucine--tRNA ligase, mitochondrial OS=Homo sapiens OX=9606 GN=IARS2 PE=1 SV=2	20	17	26	17	1012	113.7	7.2	56.28	91.6	128	124.8	86.3	85.2	84.1	0.135426	0.430197
P07099	EPHX1	Epoxide hydrolase 1 OS=Homo sapiens OX=9606 GN=EPHX1 PE=1 SV=1	33	13	35	13	455	52.9	7.25	69.16	95.2	99.4	112.8	104.9	100.8	87	0.692484	0.0706944
Q9NZN3	EHD3	EH domain-containing protein 3 OS=Homo sapiens OX=9606 GN=EHD3 PE=1 SV=2	39	18	37	8	535	60.8	6.57	64.92	107.7	58.2	57.9	134.9	131.3	110.1	0.0618692	-0.749673
P09651	HNRNPA1	Heterogeneous nuclear ribonucleoprotein A1 OS=Homo sapiens OX=9606 GN=HNRNPA1 PE=1 SV=5	35	11	47	9	372	38.7	9.13	64.91	96.3	109.4	135.2	86	86.9	86.2	0.139663	0.39584
Q99832	CCT7	T-complex protein 1 subunit eta OS=Homo sapiens OX=9606 GN=CCT7 PE=1 SV=2	41	19	30	19	543	59.3	7.65	47.37	98	105.6	97.8	98.1	99.3	101	0.754904	0.0144319
P54819	AK2	Adenylate kinase 2, mitochondrial OS=Homo sapiens OX=9606 GN=AK2 PE=1 SV=2	59	12	33	12	239	26.5	7.81	64.52	85.7	170.9	114.6	74.1	76.1	78.7	0.194788	0.697479
P07954	FH	Fumarate hydratase, mitochondrial OS=Homo sapiens OX=9606 GN=FH PE=1 SV=3	32	14	32	14	510	54.6	8.76	51	81.1	130.2	142.3	83.7	83.4	79.3	0.211807	0.521116
Q16778	HIST2H2BE	Histone H2B type 2-E OS=Homo sapiens OX=9606 GN=HIST2H2BE PE=1 SV=3	65	10	206	2	126	13.9	10.32	276.58	109.9	119.2	95	100.8	92.3	82.8	0.0996205	0.232294
O00151	PDLIM1	PDZ and LIM domain protein 1 OS=Homo sapiens OX=9606 GN=PDLIM1 PE=1 SV=4	50	14	35	14	329	36	7.02	50.55	109.4	93.3	95.7	96.4	99.7	105.5	0.894384	-0.0153889
Q16822	PCK2	Phosphoenolpyruvate carboxykinase [GTP], mitochondrial OS=Homo sapiens OX=9606 GN=PCK2 PE=1 SV=4	33	17	32	17	640	70.7	7.62	57.07	82.5	122.1	129	83.9	93.6	88.8	0.211814	0.325067
P05455	SSB	Lupus La protein OS=Homo sapiens OX=9606 GN=SSB PE=1 SV=2	43	21	34	21	408	46.8	7.12	45.2	98.1	129.8	114.8	88.9	83.6	84.8	0.117156	0.413495
Q5SSJ5	HP1BP3	Heterochromatin protein 1-binding protein 3 OS=Homo sapiens OX=9606 GN=HP1BP3 PE=1 SV=1	32	16	36	16	553	61.2	9.67	58.51	93.7	140.7	110.1	90.3	83.3	81.9	0.197667	0.431181
Q14240	EIF4A2	Eukaryotic initiation factor 4A-II OS=Homo sapiens OX=9606 GN=EIF4A2 PE=1 SV=2	36	15	27	8	407	46.4	5.48	46.22	103.6	114.7	101.8	96.1	94.2	89.7	0.0723779	0.193096
P08758	ANXA5	Annexin A5 OS=Homo sapiens OX=9606 GN=ANXA5 PE=1 SV=2	41	16	63	15	320	35.9	5.05	114.35	99.3	142.6	94.2	83	93.8	87.1	0.197412	0.348899
Q9UGT4	SUSD2	Sushi domain-containing protein 2 OS=Homo sapiens OX=9606 GN=SUSD2 PE=1 SV=1	26	15	27	15	822	90.2	6.28	53.08	128.7	84.4	89.2	110.6	106	81.2	0.911312	0.0216372
O94760	DDAH1	N(G),N(G)-dimethylarginine dimethylaminohydrolase 1 OS=Homo sapiens OX=9606 GN=DDAH1 PE=1 SV=3	61	16	34	15	285	31.1	5.81	58.07	84	165.7	110.4	86.8	75.8	77.3	0.275909	0.585964
Q92945	KHSRP	Far upstream element-binding protein 2 OS=Homo sapiens OX=9606 GN=KHSRP PE=1 SV=4	34	21	32	17	711	73.1	7.3	58.46	97.1	120.6	118.6	87.9	86.7	89.1	0.0862176	0.350851
P07585	DCN	Decorin OS=Homo sapiens OX=9606 GN=DCN PE=1 SV=1	34	12	57	11	359	39.7	8.54	109.31	98.3	56.5	70.5	101.8	93.8	179	0.24905	-0.733504
A8TX70	COL6A5	Collagen alpha-5(VI) chain OS=Homo sapiens OX=9606 GN=COL6A5 PE=1 SV=1	8	22	30	20	2615	289.7	6.95	39.14	131.5	70.9	59	119.4	128.9	90.3	0.334836	-0.373323
O60506	SYNCRIP	Heterogeneous nuclear ribonucleoprotein Q OS=Homo sapiens OX=9606 GN=SYNCRIP PE=1 SV=2	33	18	29	12	623	69.6	8.59	47.27	109.9	110.1	112.7	87	93.5	86.7	0.0156673	0.316302
P19367	HK1	Hexokinase-1 OS=Homo sapiens OX=9606 GN=HK1 PE=1 SV=3	21	21	29	21	917	102.4	6.8	46.47	104.3	109.7	117.9	88.7	88.9	90.5	0.0248204	0.307977
P22695	UQCRC2	Cytochrome b-c1 complex subunit 2, mitochondrial OS=Homo sapiens OX=9606 GN=UQCRC2 PE=1 SV=3	32	12	26	12	453	48.4	8.63	55.5	102	115.9	106.4	95.2	91.8	88.6	0.0848176	0.234753
Q9BW04	SARG	Specifically androgen-regulated gene protein OS=Homo sapiens OX=9606 GN=SARG PE=1 SV=2	33	13	27	13	601	63.9	8.62	33.66	95.8	96.3	183.5	71.9	67.9	84.6	0.173622	0.743124
Q04637	EIF4G1	Eukaryotic translation initiation factor 4 gamma 1 OS=Homo sapiens OX=9606 GN=EIF4G1 PE=1 SV=4	16	22	30	22	1599	175.4	5.33	26.15	105.9	115.9	132.2	83.6	81.1	81.3	0.0490179	0.525091
P02649	APOE	Apolipoprotein E OS=Homo sapiens OX=9606 GN=APOE PE=1 SV=1	51	18	30	18	317	36.1	5.73	60.2	91.5	77.7	71	110	121.9	128	0.0719165	-0.58336
P50995	ANXA11	Annexin A11 OS=Homo sapiens OX=9606 GN=ANXA11 PE=1 SV=1	34	15	30	15	505	54.4	7.65	45.74	102.7	101.9	102.2	103.4	94.1	95.7	0.228492	0.0654134
Q7Z6Z7	HUWE1	E3 ubiquitin-protein ligase HUWE1 OS=Homo sapiens OX=9606 GN=HUWE1 PE=1 SV=3	7	26	27	26	4374	481.6	5.22	29.9	94.9	115	111.5	98.6	87.3	92.7	0.266338	0.206175
P23142	FBLN1	Fibulin-1 OS=Homo sapiens OX=9606 GN=FBLN1 PE=1 SV=4	27	16	28	16	703	77.2	5.22	48.83	111.1	102	77	102	93.2	114.7	0.712549	-0.0952525
P14868	DARS	Aspartate--tRNA ligase, cytoplasmic OS=Homo sapiens OX=9606 GN=DARS PE=1 SV=2	40	18	26	18	501	57.1	6.55	40.37	94.1	117.8	113.4	92.2	91	91.5	0.157179	0.243914
P14314	PRKCSH	Glucosidase 2 subunit beta OS=Homo sapiens OX=9606 GN=PRKCSH PE=1 SV=2	33	16	29	16	528	59.4	4.41	47.91	90.6	119.9	120.1	88.2	88.7	92.4	0.15313	0.295872
Q14573	ITPR3	Inositol 1,4,5-trisphosphate receptor type 3 OS=Homo sapiens OX=9606 GN=ITPR3 PE=1 SV=2	11	29	33	22	2671	303.9	6.48	29.69	87	109.5	149.6	87.7	79.9	86.2	0.238428	0.447497
B9A064	IGLL5	Immunoglobulin lambda-like polypeptide 5 OS=Homo sapiens OX=9606 GN=IGLL5 PE=2 SV=2	38	7	67	3	214	23	8.84	153.78	90.8	73.3	83.9	108.2	107.1	136.7	0.0771173	-0.505235
Q14974	KPNB1	Importin subunit beta-1 OS=Homo sapiens OX=9606 GN=KPNB1 PE=1 SV=2	22	17	26	17	876	97.1	4.78	48.54	96	104	103	97.3	103.1	96.6	0.474533	0.0288549
P50570	DNM2	Dynamin-2 OS=Homo sapiens OX=9606 GN=DNM2 PE=1 SV=2	20	15	24	15	870	98	7.44	44.06	103	92.6	105.9	101	101.7	95.8	0.873952	0.0144271
Q04917	YWHAH	14-3-3 protein eta OS=Homo sapiens OX=9606 GN=YWHAH PE=1 SV=4	43	12	40	9	246	28.2	4.84	63.9	103.7	111.3	127	93.8	83.3	81	0.115323	0.406066
P17858	PFKL	ATP-dependent 6-phosphofructokinase, liver type OS=Homo sapiens OX=9606 GN=PFKL PE=1 SV=6	24	15	23	10	780	85	7.5	41.22	101.4	101.2	99	99.8	99.8	98.8	0.134819	0.0153889
P26641	EEF1G	Elongation factor 1-gamma OS=Homo sapiens OX=9606 GN=EEF1G PE=1 SV=3	26	15	27	15	437	50.1	6.67	36.75	98	120.3	122.3	84.9	86.1	88.4	0.0605891	0.3929
Q13435	SF3B2	Splicing factor 3B subunit 2 OS=Homo sapiens OX=9606 GN=SF3B2 PE=1 SV=2	22	20	28	20	895	100.2	5.67	35.04	100.2	124.9	118.1	86.2	84.2	86.4	0.0668121	0.418404
Q16851	UGP2	UTP--glucose-1-phosphate uridylyltransferase OS=Homo sapiens OX=9606 GN=UGP2 PE=1 SV=5	30	14	33	14	508	56.9	8.15	49.68	97.7	100.4	110.6	98	98.3	95	0.361905	0.0836998
O94979	SEC31A	Protein transport protein Sec31A OS=Homo sapiens OX=9606 GN=SEC31A PE=1 SV=3	17	19	28	19	1220	132.9	6.89	30.77	92.9	108.8	121.2	92.1	92.6	92.4	0.2	0.220681
Q15019	SEPTIN2	Septin-2 OS=Homo sapiens OX=9606 GN=SEPTIN2 PE=1 SV=1	41	13	28	13	361	41.5	6.6	40.33	109.4	108.5	94	99.9	96	92.2	0.130495	0.114514
Q8NBS9	TXNDC5	Thioredoxin domain-containing protein 5 OS=Homo sapiens OX=9606 GN=TXNDC5 PE=1 SV=2	34	15	31	15	432	47.6	5.97	53.26	91.7	137.4	156.2	65.4	67	82.3	0.0654991	0.84366
O43852	CALU	Calumenin OS=Homo sapiens OX=9606 GN=CALU PE=1 SV=2	54	15	31	15	315	37.1	4.64	62.81	85.9	154.4	133.5	72.8	72.3	81	0.132748	0.725306
O95336	PGLS	6-phosphogluconolactonase OS=Homo sapiens OX=9606 GN=PGLS PE=1 SV=2	51	9	22	9	258	27.5	6.05	53.29	97.5	108.6	101.4	95.2	105.7	91.5	0.175159	0.0726431
Q14152	EIF3A	Eukaryotic translation initiation factor 3 subunit A OS=Homo sapiens OX=9606 GN=EIF3A PE=1 SV=1	21	25	29	25	1382	166.5	6.79	47.11	99.4	105.4	110	96.9	96.4	91.9	0.160965	0.142462
P58107	EPPK1	Epiplakin OS=Homo sapiens OX=9606 GN=EPPK1 PE=1 SV=3	19	21	26	15	5088	555.3	5.62	35.85	112.5	90.9	102.2	105.8	94	94.6	0.389698	0.0538669
P13804	ETFA	Electron transfer flavoprotein subunit alpha, mitochondrial OS=Homo sapiens OX=9606 GN=ETFA PE=1 SV=1	39	10	23	10	333	35.1	8.38	44.51	96.3	142.1	111.9	83.1	84.1	82.4	0.124363	0.488973
Q14847	LASP1	LIM and SH3 domain protein 1 OS=Homo sapiens OX=9606 GN=LASP1 PE=1 SV=2	48	15	36	15	261	29.7	7.05	55.23	120.3	118.6	95.2	95.5	87.8	82.5	0.0505561	0.329939
O15144	ARPC2	Actin-related protein 2/3 complex subunit 2 OS=Homo sapiens OX=9606 GN=ARPC2 PE=1 SV=1	40	13	39	13	300	34.3	7.36	59.32	103.9	103	105.6	95	98.7	93.7	0.0632307	0.120796
Q13753	LAMC2	Laminin subunit gamma-2 OS=Homo sapiens OX=9606 GN=LAMC2 PE=1 SV=2	18	21	25	21	1193	130.9	6.19	49.04	147.3	63.6	59.2	126.6	107.9	95.4	0.432512	-0.288535
Q9NR45	NANS	Sialic acid synthase OS=Homo sapiens OX=9606 GN=NANS PE=1 SV=2	44	14	26	14	359	40.3	6.74	49.26	108.2	126.4	134.8	72.6	75.3	82.7	0.0130663	0.679791
Q02252	ALDH6A1	Methylmalonate-semialdehyde dehydrogenase [acylating], mitochondrial OS=Homo sapiens OX=9606 GN=ALDH6A1 PE=1 SV=2	36	16	30	16	535	57.8	8.5	58.07	81.6	160.4	103	83	89.4	82.6	0.296732	0.436099
P43243	MATR3	Matrin-3 OS=Homo sapiens OX=9606 GN=MATR3 PE=1 SV=2	25	18	25	18	847	94.6	6.25	37.75	95.4	130.2	107.3	93.4	89.2	84.5	0.190947	0.317709
Q15365	PCBP1	Poly(rC)-binding protein 1 OS=Homo sapiens OX=9606 GN=PCBP1 PE=1 SV=2	38	10	26	5	356	37.5	7.09	61.31	101.9	112.2	113.4	90.6	93.2	88.7	0.0420415	0.265239
P24752	ACAT1	Acetyl-CoA acetyltransferase, mitochondrial OS=Homo sapiens OX=9606 GN=ACAT1 PE=1 SV=1	33	13	29	13	427	45.2	8.85	49.97	91.9	139.4	122	76.9	87.2	82.6	0.0827575	0.518136
P51608	MECP2	Methyl-CpG-binding protein 2 OS=Homo sapiens OX=9606 GN=MECP2 PE=1 SV=1	40	16	22	16	486	52.4	9.95	35.17	101.8	127.7	97.1	91.8	90.1	91.6	0.219795	0.255984
P17987	TCP1	T-complex protein 1 subunit alpha OS=Homo sapiens OX=9606 GN=TCP1 PE=1 SV=1	34	17	32	17	556	60.3	6.11	48.34	97.7	110.6	100.1	96.9	96.2	98.6	0.335052	0.0803174
Q01469	FABP5	Fatty acid-binding protein 5 OS=Homo sapiens OX=9606 GN=FABP5 PE=1 SV=3	59	9	25	9	135	15.2	7.01	58.59	147	66.5	77.7	123.2	98.9	86.7	0.753347	-0.0846624
Q13751	LAMB3	Laminin subunit beta-3 OS=Homo sapiens OX=9606 GN=LAMB3 PE=1 SV=1	23	21	25	21	1172	129.5	7.21	41.86	157	65.5	61.2	134	97	85.4	0.588693	-0.157383
P61981	YWHAG	14-3-3 protein gamma OS=Homo sapiens OX=9606 GN=YWHAG PE=1 SV=2	43	11	45	7	247	28.3	4.89	75.4	107.3	116.9	113.2	90.2	89.8	82.6	0.0253226	0.361593
Q99497	PARK7	Protein/nucleic acid deglycase DJ-1 OS=Homo sapiens OX=9606 GN=PARK7 PE=1 SV=2	45	11	44	11	189	19.9	6.79	76.51	91	146.6	108.6	83	83.5	87.2	0.204202	0.448482
P35232	PHB	Prohibitin OS=Homo sapiens OX=9606 GN=PHB PE=1 SV=1	50	14	27	14	272	29.8	5.76	52.25	93.7	119.9	109.4	96.1	92.2	88.7	0.233825	0.221648
P40121	CAPG	Macrophage-capping protein OS=Homo sapiens OX=9606 GN=CAPG PE=1 SV=2	30	9	34	9	348	38.5	6.19	70.46	91	110.5	110.2	75.6	115.9	96.8	0.360197	0.112587
Q13263	TRIM28	Transcription intermediary factor 1-beta OS=Homo sapiens OX=9606 GN=TRIM28 PE=1 SV=5	20	14	23	14	835	88.5	5.77	45.92	95	119.7	146.3	80.6	80.7	77.7	0.121892	0.594988
O94832	MYO1D	Unconventional myosin-Id OS=Homo sapiens OX=9606 GN=MYO1D PE=1 SV=2	22	21	28	21	1006	116.1	9.39	34.08	99	107.4	100.7	95	101.1	96.8	0.0263461	0.0683003
O75643	SNRNP200	U5 small nuclear ribonucleoprotein 200 kDa helicase OS=Homo sapiens OX=9606 GN=SNRNP200 PE=1 SV=2	12	22	27	22	2136	244.4	6.06	36.2	94.9	123.5	117	91.7	86.6	86.3	0.150313	0.34207
Q9BUJ2	HNRNPUL1	Heterogeneous nuclear ribonucleoprotein U-like protein 1 OS=Homo sapiens OX=9606 GN=HNRNPUL1 PE=1 SV=2	25	16	22	16	856	95.7	6.92	35.24	97.2	106.6	109.9	107.6	90.5	88.1	0.453036	0.132362
P16284	PECAM1	Platelet endothelial cell adhesion molecule OS=Homo sapiens OX=9606 GN=PECAM1 PE=1 SV=2	27	16	21	16	738	82.5	6.99	44.68	119.3	68	69.5	133.1	116.3	93.7	0.106403	-0.417984
P51572	BCAP31	B-cell receptor-associated protein 31 OS=Homo sapiens OX=9606 GN=BCAP31 PE=1 SV=3	41	15	33	15	246	28	8.44	51.23	98.5	136	106.6	82.9	89.5	86.4	0.104214	0.398357
Q9UQE7	SMC3	Structural maintenance of chromosomes protein 3 OS=Homo sapiens OX=9606 GN=SMC3 PE=1 SV=2	19	22	25	22	1217	141.5	7.18	28.71	94	114.3	108.8	96.1	95.9	90.9	0.233373	0.164646
Q9BX66	SORBS1	Sorbin and SH3 domain-containing protein 1 OS=Homo sapiens OX=9606 GN=SORBS1 PE=1 SV=3	18	19	25	19	1292	142.4	6.84	31.46	109.8	79.3	89.2	115.8	110.9	95.1	0.231994	-0.209523
P30044	PRDX5	Peroxiredoxin-5, mitochondrial OS=Homo sapiens OX=9606 GN=PRDX5 PE=1 SV=4	56	10	36	10	214	22.1	8.7	75.7	88.4	141.2	119.7	90.8	83	76.9	0.212447	0.478505
O00299	CLIC1	Chloride intracellular channel protein 1 OS=Homo sapiens OX=9606 GN=CLIC1 PE=1 SV=4	58	11	25	11	241	26.9	5.17	50.82	100.5	97.7	121	94.9	93.5	92.4	0.247041	0.184918
P04899	GNAI2	Guanine nucleotide-binding protein G(i) subunit alpha-2 OS=Homo sapiens OX=9606 GN=GNAI2 PE=1 SV=3	39	12	27	7	355	40.4	5.54	53.55	109.7	90.8	93.3	106.7	103.5	96	0.462765	-0.0596399
Q92896	GLG1	Golgi apparatus protein 1 OS=Homo sapiens OX=9606 GN=GLG1 PE=1 SV=2	20	20	23	20	1179	134.5	6.9	29.29	98.4	138	113.9	84.1	81	84.6	0.115498	0.488395
P19827	ITIH1	Inter-alpha-trypsin inhibitor heavy chain H1 OS=Homo sapiens OX=9606 GN=ITIH1 PE=1 SV=3	15	11	21	11	911	101.3	6.79	42.74	73.5	81.3	80.3	83.2	134.2	147.5	0.12933	-0.634227
P47756	CAPZB	F-actin-capping protein subunit beta OS=Homo sapiens OX=9606 GN=CAPZB PE=1 SV=4	45	12	33	12	277	31.3	5.59	66.08	102.3	118.7	101.5	90	95.1	92.4	0.0762655	0.216811
Q96CX2	KCTD12	BTB/POZ domain-containing protein KCTD12 OS=Homo sapiens OX=9606 GN=KCTD12 PE=1 SV=1	42	12	26	12	325	35.7	5.64	48.38	104.1	89.6	80	102.8	123.5	100	0.22886	-0.253604
P51991	HNRNPA3	Heterogeneous nuclear ribonucleoprotein A3 OS=Homo sapiens OX=9606 GN=HNRNPA3 PE=1 SV=2	31	11	25	11	378	39.6	9.01	31.45	96.1	126.1	112.3	85.3	88.2	92	0.101348	0.333294
P49792	RANBP2	E3 SUMO-protein ligase RanBP2 OS=Homo sapiens OX=9606 GN=RANBP2 PE=1 SV=2	10	23	27	20	3224	358	6.2	23.19	97.5	125.4	112	93.5	86.6	84.9	0.150308	0.337738
P56199	ITGA1	Integrin alpha-1 OS=Homo sapiens OX=9606 GN=ITGA1 PE=1 SV=2	19	24	37	24	1179	130.8	6.29	35.38	117.8	78.8	81.7	117.6	108.1	96	0.231474	-0.209075
P49588	AARS	Alanine--tRNA ligase, cytoplasmic OS=Homo sapiens OX=9606 GN=AARS PE=1 SV=2	20	18	27	18	968	106.7	5.53	36.2	96.5	125.5	108	89.9	89.3	90.7	0.146626	0.290041
O94973	AP2A2	AP-2 complex subunit alpha-2 OS=Homo sapiens OX=9606 GN=AP2A2 PE=1 SV=2	21	17	22	10	939	103.9	6.96	36.01	92.2	119.7	110.7	87.8	95	94.6	0.124593	0.217779
O75533	SF3B1	Splicing factor 3B subunit 1 OS=Homo sapiens OX=9606 GN=SF3B1 PE=1 SV=3	21	22	24	22	1304	145.7	7.09	26.47	93.8	124.9	114.7	92.4	88.3	86	0.17241	0.322036
Q32MZ4	LRRFIP1	Leucine-rich repeat flightless-interacting protein 1 OS=Homo sapiens OX=9606 GN=LRRFIP1 PE=1 SV=2	21	15	20	14	808	89.2	4.65	37.3	105.8	108.5	106.1	94.9	95.9	88.8	0.0192364	0.19651
Q9NYL9	TMOD3	Tropomodulin-3 OS=Homo sapiens OX=9606 GN=TMOD3 PE=1 SV=1	42	16	27	14	352	39.6	5.19	52.48	115.1	101.4	104.3	97.6	95.2	86.4	0.0687008	0.200375
P25311	AZGP1	Zinc-alpha-2-glycoprotein OS=Homo sapiens OX=9606 GN=AZGP1 PE=1 SV=2	46	14	22	14	298	34.2	6.05	43.57	96.2	66	65.1	123.8	121.4	127.5	0.0448677	-0.713417
Q12906	ILF3	Interleukin enhancer-binding factor 3 OS=Homo sapiens OX=9606 GN=ILF3 PE=1 SV=3	21	18	30	16	894	95.3	8.76	47.78	98.4	124.3	122.9	84	88.8	81.5	0.0654783	0.442572
O96009	NAPSA	Napsin-A OS=Homo sapiens OX=9606 GN=NAPSA PE=1 SV=1	17	8	43	8	420	45.4	6.61	75.25	68	193.7	152.9	58.8	59.8	66.8	0.170138	1.16108
P49591	SARS	Serine--tRNA ligase, cytoplasmic OS=Homo sapiens OX=9606 GN=SARS PE=1 SV=3	40	18	25	18	514	58.7	6.43	35.86	99.1	123.6	104.9	89.9	92.1	90.4	0.111688	0.266209
P35609	ACTN2	Alpha-actinin-2 OS=Homo sapiens OX=9606 GN=ACTN2 PE=1 SV=1	15	13	36	2	894	103.8	5.45	61.39	117.8	87.6	67.5	123.5	113.8	89.8	0.10271	-0.261359
Q14767	LTBP2	Latent-transforming growth factor beta-binding protein 2 OS=Homo sapiens OX=9606 GN=LTBP2 PE=1 SV=3	14	18	25	17	1821	194.9	5.19	30.71	90.1	132	106.8	80.8	82.4	108	0.340055	0.278292
Q13561	DCTN2	Dynactin subunit 2 OS=Homo sapiens OX=9606 GN=DCTN2 PE=1 SV=4	44	13	19	13	401	44.2	5.21	39.21	108.1	97.7	101	99.6	97.6	96	0.20382	0.0654134
P00387	CYB5R3	NADH-cytochrome b5 reductase 3 OS=Homo sapiens OX=9606 GN=CYB5R3 PE=1 SV=3	35	10	28	10	301	34.2	7.59	55.28	102.4	111.4	95.6	92.2	104	94.4	0.142544	0.0904385
P0DOY2	IGLC2	Immunoglobulin lambda constant 2 OS=Homo sapiens OX=9606 GN=IGLC2 PE=1 SV=1	70	6	102	2	106	11.3	7.24	228.17	86.2	61.4	82.4	110.3	112.8	146.9	0.0593016	-0.685891
Q08257	CRYZ	Quinone oxidoreductase OS=Homo sapiens OX=9606 GN=CRYZ PE=1 SV=1	38	12	33	12	329	35.2	8.44	61.19	85.4	199.6	97.3	77.7	70.6	69.3	0.280867	0.813027
P46459	NSF	Vesicle-fusing ATPase OS=Homo sapiens OX=9606 GN=NSF PE=1 SV=3	21	17	31	16	744	82.5	6.95	46.59	99.4	127.4	118.9	83	84.2	87.1	0.0592465	0.442989
P00568	AK1	Adenylate kinase isoenzyme 1 OS=Homo sapiens OX=9606 GN=AK1 PE=1 SV=3	65	12	26	12	194	21.6	8.63	48.89	88.3	97.7	137.5	98.8	92.6	85.1	0.494538	0.226486
Q9NYU2	UGGT1	UDP-glucose:glycoprotein glucosyltransferase 1 OS=Homo sapiens OX=9606 GN=UGGT1 PE=1 SV=3	14	20	25	20	1555	177.1	5.63	35.99	93.2	117.2	114.2	91.2	94.5	89.8	0.150914	0.236611
Q9Y6C2	EMILIN1	EMILIN-1 OS=Homo sapiens OX=9606 GN=EMILIN1 PE=1 SV=3	22	16	23	16	1016	106.6	5.17	45.32	115.1	85	78.1	100.1	106.9	114.8	0.444236	-0.210042
P02749	APOH	Beta-2-glycoprotein 1 OS=Homo sapiens OX=9606 GN=APOH PE=1 SV=3	45	12	24	12	345	38.3	7.97	38.41	95.7	78.5	79.7	105	115.6	125.7	0.108263	-0.447762
P80723	BASP1	Brain acid soluble protein 1 OS=Homo sapiens OX=9606 GN=BASP1 PE=1 SV=2	79	11	19	11	227	22.7	4.63	27.12	101.3	88	123.1	87.8	85.1	114.8	0.114832	0.118829
O43242	PSMD3	26S proteasome non-ATPase regulatory subunit 3 OS=Homo sapiens OX=9606 GN=PSMD3 PE=1 SV=2	30	15	20	15	534	60.9	8.44	36.55	96.4	120.1	113.7	90	91.6	88.1	0.100685	0.291985
O75116	ROCK2	Rho-associated protein kinase 2 OS=Homo sapiens OX=9606 GN=ROCK2 PE=1 SV=4	16	21	26	19	1388	160.8	6.02	33.3	111.3	91.8	101.8	102.4	95.1	97.6	0.454899	0.0471322
P60903	S100A10	Protein S100-A10 OS=Homo sapiens OX=9606 GN=S100A10 PE=1 SV=2	46	5	51	5	97	11.2	7.37	85.05	139.5	64.3	62	123.5	112.6	98.1	0.367	-0.330371
P31946	YWHAB	14-3-3 protein beta/alpha OS=Homo sapiens OX=9606 GN=YWHAB PE=1 SV=3	41	10	48	4	246	28.1	4.83	62.8	104.5	100.1	107.8	97.5	96.1	93.9	0.105352	0.119832
P54578	USP14	Ubiquitin carboxyl-terminal hydrolase 14 OS=Homo sapiens OX=9606 GN=USP14 PE=1 SV=3	29	16	23	16	494	56	5.3	37.93	94.3	104	98	100.7	104.4	98.6	0.336636	-0.0355883
Q15418	RPS6KA1	Ribosomal protein S6 kinase alpha-1 OS=Homo sapiens OX=9606 GN=RPS6KA1 PE=1 SV=2	26	16	22	10	735	82.7	7.83	30.87	90.8	130.2	98.7	96.2	92.9	91.2	0.408044	0.189747
P61160	ACTR2	Actin-related protein 2 OS=Homo sapiens OX=9606 GN=ACTR2 PE=1 SV=1	27	9	27	9	394	44.7	6.74	59.3	99.2	96.3	100.4	96.3	105.4	102.4	0.514835	-0.0394361
P10301	RRAS	Ras-related protein R-Ras OS=Homo sapiens OX=9606 GN=RRAS PE=1 SV=1	56	11	30	9	218	23.5	6.93	35.93	118.1	72.9	79.7	121	113	95.3	0.215476	-0.282708
P62424	RPL7A	60S ribosomal protein L7a OS=Homo sapiens OX=9606 GN=RPL7A PE=1 SV=2	38	12	22	12	266	30	10.61	48.94	100.9	118.5	118.4	83.8	89.4	89	0.0248805	0.365502
Q8NC51	SERBP1	Plasminogen activator inhibitor 1 RNA-binding protein OS=Homo sapiens OX=9606 GN=SERBP1 PE=1 SV=2	29	14	23	14	408	44.9	8.65	37.53	102.2	129.7	123.6	79.8	78.9	85.8	0.045855	0.540015
O15247	CLIC2	Chloride intracellular channel protein 2 OS=Homo sapiens OX=9606 GN=CLIC2 PE=1 SV=3	47	11	19	11	247	28.3	5.59	34.01	113.8	81.9	74.5	115.4	116.6	97.8	0.177334	-0.287564
Q14624	ITIH4	Inter-alpha-trypsin inhibitor heavy chain H4 OS=Homo sapiens OX=9606 GN=ITIH4 PE=1 SV=4	17	13	22	13	930	103.3	6.98	44.66	79.3	78.4	77.5	106.4	128.9	129.6	0.0331983	-0.633613
P05155	SERPING1	Plasma protease C1 inhibitor OS=Homo sapiens OX=9606 GN=SERPING1 PE=1 SV=2	20	10	25	10	500	55.1	6.55	50.27	86.6	62.8	77.1	116.6	121.9	134.9	0.035574	-0.721211
P63244	RACK1	Receptor of activated protein C kinase 1 OS=Homo sapiens OX=9606 GN=RACK1 PE=1 SV=3	47	13	30	13	317	35.1	7.69	51.72	100	113.9	124.3	87.7	86.6	87.5	0.0702582	0.369412
P29966	MARCKS	Myristoylated alanine-rich C-kinase substrate OS=Homo sapiens OX=9606 GN=MARCKS PE=1 SV=4	34	7	24	7	332	31.5	4.45	46.36	114.9	85.9	77.6	107.5	119.4	94.6	0.350098	-0.20766
P05388	RPLP0	60S acidic ribosomal protein P0 OS=Homo sapiens OX=9606 GN=RPLP0 PE=1 SV=1	36	9	20	9	317	34.3	5.97	49.81	100.9	112.1	133.4	84.1	86.1	83.5	0.0885775	0.449315
O60763	USO1	General vesicular transport factor p115 OS=Homo sapiens OX=9606 GN=USO1 PE=1 SV=2	17	16	22	16	962	107.8	4.91	29.11	93	117.7	123.5	89	90.9	85.9	0.147924	0.330371
Q8IWL1	SFTPA2	Pulmonary surfactant-associated protein A2 OS=Homo sapiens OX=9606 GN=SFTPA2 PE=1 SV=1	38	9	35	9	248	26.2	5.17	82.14	106.9	51.8	83.7	110.8	110.8	136	0.15745	-0.560957
P05141	SLC25A5	ADP/ATP translocase 2 OS=Homo sapiens OX=9606 GN=SLC25A5 PE=1 SV=7	32	12	33	5	298	32.8	9.69	57.86	91.5	163	119.1	71.9	75.4	79.1	0.135221	0.72262
Q13177	PAK2	Serine/threonine-protein kinase PAK 2 OS=Homo sapiens OX=9606 GN=PAK2 PE=1 SV=3	38	15	20	15	524	58	5.96	33.9	96.9	92.3	87.9	111.5	111.6	99.8	0.019472	-0.220681
P51888	PRELP	Prolargin OS=Homo sapiens OX=9606 GN=PRELP PE=1 SV=1	34	11	37	11	382	43.8	9.38	77.04	105.7	68	75.8	110.6	108	131.9	0.155799	-0.490375
P13647	KRT5	Keratin, type II cytoskeletal 5 OS=Homo sapiens OX=9606 GN=KRT5 PE=1 SV=3	28	19	32	10	590	62.3	7.74	50.38	107.5	88.2	98.6	160	66	79.7	0.890399	-0.054829
P61916	NPC2	NPC intracellular cholesterol transporter 2 OS=Homo sapiens OX=9606 GN=NPC2 PE=1 SV=1	44	6	27	6	151	16.6	7.65	55.61	85.8	116.9	187.6	61.8	73.3	74.6	0.155539	0.896257
P08575	PTPRC	Receptor-type tyrosine-protein phosphatase C OS=Homo sapiens OX=9606 GN=PTPRC PE=1 SV=3	15	17	25	17	1306	147.4	6.15	35.67	101.7	90.2	95.3	101.5	104.2	107.1	0.19281	-0.123185
Q9UJU6	DBNL	Drebrin-like protein OS=Homo sapiens OX=9606 GN=DBNL PE=1 SV=1	42	16	22	16	430	48.2	5.05	33.61	99.3	121.1	110.5	95.7	85.4	88.1	0.157841	0.297717
P06737	PYGL	Glycogen phosphorylase, liver form OS=Homo sapiens OX=9606 GN=PYGL PE=1 SV=4	24	20	27	15	847	97.1	7.17	40.56	98.7	103.4	114.9	102.9	84.7	95.3	0.281822	0.164191
P24844	MYL9	Myosin regulatory light polypeptide 9 OS=Homo sapiens OX=9606 GN=MYL9 PE=1 SV=4	51	9	37	3	172	19.8	4.92	58.83	108.1	91	87.5	111.5	102.9	99	0.0841339	-0.128967
Q13576	IQGAP2	Ras GTPase-activating-like protein IQGAP2 OS=Homo sapiens OX=9606 GN=IQGAP2 PE=1 SV=4	14	19	24	19	1575	180.5	5.64	26.94	94.3	123.6	91.8	88.4	103.5	98.5	0.493355	0.0928299
Q9HC35	EML4	Echinoderm microtubule-associated protein-like 4 OS=Homo sapiens OX=9606 GN=EML4 PE=1 SV=3	21	18	24	18	981	108.8	6.4	32.17	106.4	116.6	118.7	81.7	88.1	88.4	0.00349836	0.404241
P10909	CLU	Clusterin OS=Homo sapiens OX=9606 GN=CLU PE=1 SV=1	29	12	21	12	449	52.5	6.27	33.1	97.2	80.1	75.9	109.1	116.3	121.3	0.0892505	-0.45341
Q9UHD8	SEPTIN9	Septin-9 OS=Homo sapiens OX=9606 GN=SEPTIN9 PE=1 SV=2	30	15	21	15	586	65.4	8.97	45.94	98.5	114	94.5	91.5	100.5	101.1	0.515897	0.0668457
Q9UQ80	PA2G4	Proliferation-associated protein 2G4 OS=Homo sapiens OX=9606 GN=PA2G4 PE=1 SV=3	34	12	23	12	394	43.8	6.55	41.62	96.1	100.9	116.4	94.9	96.8	94.9	0.294126	0.128967
Q9NZA1	CLIC5	Chloride intracellular channel protein 5 OS=Homo sapiens OX=9606 GN=CLIC5 PE=1 SV=3	37	10	18	9	410	46.5	4.82	36.68	133.2	65.1	82.2	123.5	94.8	101.1	0.38495	-0.187364
Q14254	FLOT2	Flotillin-2 OS=Homo sapiens OX=9606 GN=FLOT2 PE=1 SV=2	26	11	20	11	428	47	5.25	34.82	91.8	122.5	107.3	95.7	95.7	87	0.263084	0.208108
P78417	GSTO1	Glutathione S-transferase omega-1 OS=Homo sapiens OX=9606 GN=GSTO1 PE=1 SV=2	41	15	33	15	241	27.5	6.6	44.53	98.3	91.5	98.2	99.1	114	98.9	0.384846	-0.115477
P31939	ATIC	Bifunctional purine biosynthesis protein PURH OS=Homo sapiens OX=9606 GN=ATIC PE=1 SV=3	26	13	20	13	592	64.6	6.71	36.58	90.1	108.4	101.4	92.9	108.5	98.8	0.954686	-0.00144245
P18124	RPL7	60S ribosomal protein L7 OS=Homo sapiens OX=9606 GN=RPL7 PE=1 SV=1	33	11	23	11	248	29.2	10.65	47.24	96.6	115.1	129.4	86.4	86.4	86.1	0.103544	0.3978
P05109	S100A8	Protein S100-A8 OS=Homo sapiens OX=9606 GN=S100A8 PE=1 SV=1	71	13	50	13	93	10.8	7.03	88.52	132.7	52.5	65.9	154.7	86.9	107.2	0.028769	-0.474138
P43652	AFM	Afamin OS=Homo sapiens OX=9606 GN=AFM PE=1 SV=1	28	16	24	16	599	69	5.9	32.85	106.5	73	72.3	119.6	111.3	117.3	0.0804649	-0.467638
P15121	AKR1B1	Aldo-keto reductase family 1 member B1 OS=Homo sapiens OX=9606 GN=AKR1B1 PE=1 SV=3	49	13	30	13	316	35.8	6.98	47.63	85.6	116.1	103.8	78.7	113.4	102.4	0.157774	0.0529047
O14950	MYL12B	Myosin regulatory light chain 12B OS=Homo sapiens OX=9606 GN=MYL12B PE=1 SV=2	51	8	39	2	172	19.8	4.84	67.29	104.8	112.5	107.6	96.7	90.4	88	0.0613026	0.24004
Q15046	KARS1	Lysine--tRNA ligase OS=Homo sapiens OX=9606 GN=KARS1 PE=1 SV=3	27	16	27	16	597	68	6.35	32.75	92.3	126	92.6	92.2	99.5	97.4	0.532656	0.104882
P62879	GNB2	Guanine nucleotide-binding protein G(I)/G(S)/G(T) subunit beta-2 OS=Homo sapiens OX=9606 GN=GNB2 PE=1 SV=3	28	9	35	3	340	37.3	6	61.49	111.4	100.7	110.6	90.6	95.8	90.9	0.0981513	0.218746
O60610	DIAPH1	Protein diaphanous homolog 1 OS=Homo sapiens OX=9606 GN=DIAPH1 PE=1 SV=2	16	18	23	18	1272	141.3	5.41	44.49	94.1	128.3	107	90.2	89.9	90.5	0.191256	0.283679
P11413	G6PD	Glucose-6-phosphate 1-dehydrogenase OS=Homo sapiens OX=9606 GN=G6PD PE=1 SV=4	36	17	28	17	515	59.2	6.84	53.36	98.5	116.3	92.1	98.2	99.8	95.1	0.52499	0.0663757
Q16181	SEPTIN7	Septin-7 OS=Homo sapiens OX=9606 GN=SEPTIN7 PE=1 SV=2	35	16	35	15	437	50.6	8.63	47.36	106.2	102.4	93.8	98.4	101.1	98.2	0.700138	0.0225989
P21399	ACO1	Cytoplasmic aconitate hydratase OS=Homo sapiens OX=9606 GN=ACO1 PE=1 SV=3	21	18	21	18	889	98.3	6.68	30.32	98.5	125.2	123.7	83.5	82.7	86.4	0.0644361	0.459743
Q15459	SF3A1	Splicing factor 3A subunit 1 OS=Homo sapiens OX=9606 GN=SF3A1 PE=1 SV=1	23	15	23	15	793	88.8	5.22	26.36	95.7	124.3	113.1	89.5	89.6	87.7	0.118976	0.320197
Q14247	CTTN	Src substrate cortactin OS=Homo sapiens OX=9606 GN=CTTN PE=1 SV=2	35	18	24	18	550	61.5	5.4	33.47	107.8	134.3	98.4	85.3	85.5	88.6	0.142803	0.392476
P48444	ARCN1	Coatomer subunit delta OS=Homo sapiens OX=9606 GN=ARCN1 PE=1 SV=1	33	18	25	18	511	57.2	6.21	30.16	98	120.9	133.7	82.5	82.3	82.7	0.0779861	0.510604
P09972	ALDOC	Fructose-bisphosphate aldolase C OS=Homo sapiens OX=9606 GN=ALDOC PE=1 SV=2	25	9	21	5	364	39.4	6.87	47.91	101.1	106.3	103.2	96.2	100.1	93.2	0.0442111	0.101494
Q9H2G2	SLK	STE20-like serine/threonine-protein kinase OS=Homo sapiens OX=9606 GN=SLK PE=1 SV=1	19	21	24	20	1235	142.6	5.15	26.85	103	94.2	102.5	101.9	96.9	101.6	0.867547	-0.00336573
P04004	VTN	Vitronectin OS=Homo sapiens OX=9606 GN=VTN PE=1 SV=1	24	10	36	10	478	54.3	5.8	51.68	99.8	86.4	79.2	104.3	115	115.4	0.136843	-0.3347
Q709C8	VPS13C	Vacuolar protein sorting-associated protein 13C OS=Homo sapiens OX=9606 GN=VPS13C PE=1 SV=1	7	21	22	21	3753	422.1	6.83	30.46	101.5	99.9	110.3	92.4	100.1	95.9	0.210342	0.112087
P49257	LMAN1	Protein ERGIC-53 OS=Homo sapiens OX=9606 GN=LMAN1 PE=1 SV=2	27	13	21	13	510	57.5	6.77	35.19	90	102.4	153.1	83.2	83	88.3	0.227172	0.44102
Q96G03	PGM2	Phosphoglucomutase-2 OS=Homo sapiens OX=9606 GN=PGM2 PE=1 SV=4	30	19	26	19	612	68.2	6.73	40.01	113.2	97.1	93.5	101	102.3	92.8	0.665252	0.0370374
P05026	ATP1B1	Sodium/potassium-transporting ATPase subunit beta-1 OS=Homo sapiens OX=9606 GN=ATP1B1 PE=1 SV=1	42	11	23	11	303	35	8.53	27.89	97	120.4	136.4	87.4	81.7	77.2	0.130444	0.522517
P50851	LRBA	Lipopolysaccharide-responsive and beige-like anchor protein OS=Homo sapiens OX=9606 GN=LRBA PE=1 SV=4	7	19	21	19	2863	318.9	5.6	26.99	96.6	128.1	118.2	90.2	81.1	85.9	0.1378	0.414897
Q16531	DDB1	DNA damage-binding protein 1 OS=Homo sapiens OX=9606 GN=DDB1 PE=1 SV=1	18	19	24	19	1140	126.9	5.26	48.15	95.8	113.9	114.4	96.8	90.4	88.6	0.201262	0.232817
Q96I99	SUCLG2	Succinate--CoA ligase [GDP-forming] subunit beta, mitochondrial OS=Homo sapiens OX=9606 GN=SUCLG2 PE=1 SV=2	31	12	24	11	432	46.5	6.39	34.78	100.1	125.9	122.6	84.9	80.6	85.8	0.0685523	0.472162
Q9UGI8	TES	Testin OS=Homo sapiens OX=9606 GN=TES PE=1 SV=1	41	16	23	16	421	48	7.68	28.34	110.7	101.5	111.5	98.6	89.5	88.2	0.051981	0.228422
P07602	PSAP	Prosaposin OS=Homo sapiens OX=9606 GN=PSAP PE=1 SV=2	29	15	36	15	524	58.1	5.17	66.13	103.9	114.8	140.5	67.5	93.5	79.9	0.0749065	0.576353
P01903	HLA-DRA	HLA class II histocompatibility antigen, DR alpha chain OS=Homo sapiens OX=9606 GN=HLA-DRA PE=1 SV=1	33	7	29	6	254	28.6	5	50.87	101.1	130	98	86.7	97.3	86.9	0.10191	0.280766
Q15942	ZYX	Zyxin OS=Homo sapiens OX=9606 GN=ZYX PE=1 SV=1	27	10	22	10	572	61.2	6.67	37.9	121.5	93.3	82.8	107.8	102.2	92.3	0.856414	-0.0226065
P78347	GTF2I	General transcription factor II-I OS=Homo sapiens OX=9606 GN=GTF2I PE=1 SV=2	17	15	22	15	998	112.3	6.39	38	80.1	149.6	127.6	83.4	78.4	81	0.223718	0.557367
P01877	IGHA2	Immunoglobulin heavy constant alpha 2 OS=Homo sapiens OX=9606 GN=IGHA2 PE=1 SV=4	42	9	43	4	340	36.6	6.27	67	80.3	89.2	85.7	106.2	123.3	115.4	0.0062203	-0.43455
P02765	AHSG	Alpha-2-HS-glycoprotein OS=Homo sapiens OX=9606 GN=AHSG PE=1 SV=2	20	8	23	8	367	39.3	5.72	53.42	102	65.1	69.5	121	114	128.3	0.0717127	-0.618711
P31947	SFN	14-3-3 protein sigma OS=Homo sapiens OX=9606 GN=SFN PE=1 SV=1	40	10	34	7	248	27.8	4.74	56.71	67	223.7	135.3	61	52.1	60.9	0.22251	1.29177
P78371	CCT2	T-complex protein 1 subunit beta OS=Homo sapiens OX=9606 GN=CCT2 PE=1 SV=4	35	16	25	16	535	57.5	6.46	43.68	96.1	108.5	97.4	100.3	101.8	96	0.719613	0.0187522
P08123	COL1A2	Collagen alpha-2(I) chain OS=Homo sapiens OX=9606 GN=COL1A2 PE=1 SV=7	9	11	33	11	1366	129.2	8.95	64.58	129.2	63.2	83.7	84.8	82.8	156.3	0.683983	-0.230358
O60749	SNX2	Sorting nexin-2 OS=Homo sapiens OX=9606 GN=SNX2 PE=1 SV=2	31	15	23	13	519	58.4	5.12	40.39	98.8	107.8	99.4	95.1	103.4	95.5	0.00269738	0.0577155
P00491	PNP	Purine nucleoside phosphorylase OS=Homo sapiens OX=9606 GN=PNP PE=1 SV=2	42	10	17	10	289	32.1	6.95	41.41	91.8	83	95.6	111.2	109.9	108.4	0.0401885	-0.285183
P0DP25	CALM3	Calmodulin-3 OS=Homo sapiens OX=9606 GN=CALM3 PE=1 SV=1	52	8	37	6	149	16.8	4.22	85.69	114	93.6	114.5	97.4	95	85.5	0.236973	0.212943
Q13596	SNX1	Sorting nexin-1 OS=Homo sapiens OX=9606 GN=SNX1 PE=1 SV=3	25	13	19	11	522	59	5.15	31.35	103.3	97.4	103.6	99.1	104.6	91.9	0.650349	0.0418481
P38919	EIF4A3	Eukaryotic initiation factor 4A-III OS=Homo sapiens OX=9606 GN=EIF4A3 PE=1 SV=4	31	13	21	10	411	46.8	6.73	40.32	84.8	103.7	95.4	104.2	110.6	101.3	0.132053	-0.154998
P28331	NDUFS1	NADH-ubiquinone oxidoreductase 75 kDa subunit, mitochondrial OS=Homo sapiens OX=9606 GN=NDUFS1 PE=1 SV=3	29	15	17	15	727	79.4	6.23	38.09	97.1	113.2	125.2	88.2	87.6	88.7	0.0983325	0.343045
Q08380	LGALS3BP	Galectin-3-binding protein OS=Homo sapiens OX=9606 GN=LGALS3BP PE=1 SV=1	24	12	22	12	585	65.3	5.27	44.9	87.5	153.5	121.2	81.1	78.6	78.2	0.171332	0.606431
P05387	RPLP2	60S acidic ribosomal protein P2 OS=Homo sapiens OX=9606 GN=RPLP2 PE=1 SV=1	54	6	22	6	115	11.7	4.54	51.77	94.6	111.6	129.2	88.2	86.7	89.7	0.132685	0.34207
P51648	ALDH3A2	Aldehyde dehydrogenase family 3 member A2 OS=Homo sapiens OX=9606 GN=ALDH3A2 PE=1 SV=1	31	12	18	11	485	54.8	7.88	37.88	103.3	101.2	105.4	106.2	93.5	90.3	0.331872	0.0957499
P35998	PSMC2	26S proteasome regulatory subunit 7 OS=Homo sapiens OX=9606 GN=PSMC2 PE=1 SV=3	37	16	20	16	433	48.6	5.95	28.43	93.7	112.6	110.9	95.5	91.6	95.7	0.235714	0.165611
Q9BUF5	TUBB6	Tubulin beta-6 chain OS=Homo sapiens OX=9606 GN=TUBB6 PE=1 SV=1	26	10	41	5	446	49.8	4.88	39.85	116.7	89.9	84.6	94.9	106.2	107.7	0.715374	-0.0846624
P52566	ARHGDIB	Rho GDP-dissociation inhibitor 2 OS=Homo sapiens OX=9606 GN=ARHGDIB PE=1 SV=3	63	9	25	9	201	23	5.21	39.7	103.4	101.8	127.3	86.6	86.7	94.2	0.0635192	0.313815
P42765	ACAA2	3-ketoacyl-CoA thiolase, mitochondrial OS=Homo sapiens OX=9606 GN=ACAA2 PE=1 SV=2	37	13	23	13	397	41.9	8.09	32.05	104.3	101	116.7	93.5	94.7	89.8	0.143622	0.211976
P30048	PRDX3	Thioredoxin-dependent peroxide reductase, mitochondrial OS=Homo sapiens OX=9606 GN=PRDX3 PE=1 SV=3	36	6	24	6	256	27.7	7.78	63.7	99.2	135.3	110.4	81.9	84	89.2	0.108276	0.435115
P54136	RARS	Arginine--tRNA ligase, cytoplasmic OS=Homo sapiens OX=9606 GN=RARS PE=1 SV=2	26	16	30	16	660	75.3	6.68	39.28	95.8	131	112.9	88.1	85.7	86.6	0.13524	0.383532
P60981	DSTN	Destrin OS=Homo sapiens OX=9606 GN=DSTN PE=1 SV=3	43	10	24	9	165	18.5	7.85	48.06	125	108.9	93.7	96.3	88.9	87.3	0.105448	0.265679
Q92888	ARHGEF1	Rho guanine nucleotide exchange factor 1 OS=Homo sapiens OX=9606 GN=ARHGEF1 PE=1 SV=2	21	16	19	16	912	102.4	5.66	25.95	108.3	96.1	110.9	95.6	95.6	93.5	0.180099	0.147283
Q6WCQ1	MPRIP	Myosin phosphatase Rho-interacting protein OS=Homo sapiens OX=9606 GN=MPRIP PE=1 SV=3	19	15	18	15	1025	116.5	6.21	35.02	105.5	83.9	101.8	106.7	103.1	99.1	0.473948	-0.0851295
P09382	LGALS1	Galectin-1 OS=Homo sapiens OX=9606 GN=LGALS1 PE=1 SV=2	53	7	43	7	135	14.7	5.5	80.54	102.2	92.7	94.4	100.6	110.3	99.8	0.331394	-0.102956
P05362	ICAM1	Intercellular adhesion molecule 1 OS=Homo sapiens OX=9606 GN=ICAM1 PE=1 SV=2	24	12	21	12	532	57.8	7.99	48.36	112.8	80.9	92.4	103	108.4	102.6	0.479118	-0.134245
Q8TD06	AGR3	Anterior gradient protein 3 OS=Homo sapiens OX=9606 GN=AGR3 PE=1 SV=1	48	8	23	7	166	19.2	7.99	42.04	94.2	190.8	82.8	83.3	72.4	76.4	0.342029	0.664175
Q99623	PHB2	Prohibitin-2 OS=Homo sapiens OX=9606 GN=PHB2 PE=1 SV=2	43	15	26	15	299	33.3	9.83	52.98	96.8	132.1	121.5	84.6	82.4	82.6	0.0946586	0.489385
Q15109	AGER	Advanced glycosylation end product-specific receptor OS=Homo sapiens OX=9606 GN=AGER PE=1 SV=1	25	6	29	6	404	42.8	6.13	68.85	149.8	45.5	48.6	141.9	127.4	86.7	0.286217	-0.545587
P01031	C5	Complement C5 OS=Homo sapiens OX=9606 GN=C5 PE=1 SV=4	10	20	24	20	1676	188.2	6.52	29.8	80.2	73.6	76.8	106.9	123.5	139.1	0.0472115	-0.680182
Q12805	EFEMP1	EGF-containing fibulin-like extracellular matrix protein 1 OS=Homo sapiens OX=9606 GN=EFEMP1 PE=1 SV=2	28	11	19	11	493	54.6	5.07	34.72	113.2	92.2	108.1	86	86.9	113.6	0.448237	0.12993
P04080	CSTB	Cystatin-B OS=Homo sapiens OX=9606 GN=CSTB PE=1 SV=2	89	6	40	6	98	11.1	7.56	70.42	96.2	118	115.7	78.7	103.4	88.1	0.0370354	0.288001
P50502	ST13	Hsc70-interacting protein OS=Homo sapiens OX=9606 GN=ST13 PE=1 SV=2	21	7	24	7	369	41.3	5.27	36.76	89.2	132.5	88.7	99.4	98	92.2	0.667768	0.100067
P32455	GBP1	Guanylate-binding protein 1 OS=Homo sapiens OX=9606 GN=GBP1 PE=1 SV=2	22	14	22	12	592	67.9	6.32	39.15	109.8	100.4	73.6	102.6	121.7	91.9	0.354738	-0.155963
Q9UJS0	SLC25A13	Calcium-binding mitochondrial carrier protein Aralar2 OS=Homo sapiens OX=9606 GN=SLC25A13 PE=1 SV=2	25	14	17	10	675	74.1	8.62	28.27	88.8	153.7	97.8	87.5	87.9	84.2	0.306699	0.390517
Q16658	FSCN1	Fascin OS=Homo sapiens OX=9606 GN=FSCN1 PE=1 SV=3	31	15	25	15	493	54.5	7.24	48.95	107.3	82.6	88.4	115.8	108.8	97.1	0.132545	-0.209075
P27695	APEX1	DNA-(apurinic or apyrimidinic site) lyase OS=Homo sapiens OX=9606 GN=APEX1 PE=1 SV=2	40	12	23	12	318	35.5	8.12	31.94	91	122.3	120.1	91.7	90.9	84	0.194009	0.322577
P04844	RPN2	Dolichyl-diphosphooligosaccharide--protein glycosyltransferase subunit 2 OS=Homo sapiens OX=9606 GN=RPN2 PE=1 SV=3	24	11	19	11	631	69.2	5.69	33.77	93.2	105.5	119.2	90.2	94	97.9	0.152605	0.172366
P40227	CCT6A	T-complex protein 1 subunit zeta OS=Homo sapiens OX=9606 GN=CCT6A PE=1 SV=3	27	15	23	15	531	58	6.68	36.11	98.1	110.7	108.6	95.1	91.4	96.1	0.133572	0.167541
Q14258	TRIM25	E3 ubiquitin/ISG15 ligase TRIM25 OS=Homo sapiens OX=9606 GN=TRIM25 PE=1 SV=2	26	13	21	13	630	70.9	8.09	29.88	106.1	113.9	98.2	93.6	97.2	91	0.047675	0.175262
Q9Y383	LUC7L2	Putative RNA-binding protein Luc7-like 2 OS=Homo sapiens OX=9606 GN=LUC7L2 PE=1 SV=2	36	13	22	8	392	46.5	10.01	46.99	94.4	134.2	128.3	82.1	79.8	81.2	0.0999714	0.55397
Q9NZ08	ERAP1	Endoplasmic reticulum aminopeptidase 1 OS=Homo sapiens OX=9606 GN=ERAP1 PE=1 SV=3	18	15	23	15	941	107.2	6.46	23.56	93	124.3	110.6	87.1	91.4	93.7	0.141398	0.268589
Q9Y265	RUVBL1	RuvB-like 1 OS=Homo sapiens OX=9606 GN=RUVBL1 PE=1 SV=1	36	12	18	12	456	50.2	6.42	26.86	99.5	105.6	114.6	100.2	93.2	86.9	0.250661	0.189747
Q9H8L6	MMRN2	Multimerin-2 OS=Homo sapiens OX=9606 GN=MMRN2 PE=1 SV=2	15	13	17	13	949	104.3	5.86	30.2	132.1	71.4	76.5	123	103.9	93.1	0.385984	-0.192645
Q6UWY5	OLFML1	Olfactomedin-like protein 1 OS=Homo sapiens OX=9606 GN=OLFML1 PE=1 SV=2	26	10	20	10	402	45.9	8.09	39.35	135	58.9	60.8	128.4	106.6	110.2	0.242608	-0.438634
P62820	RAB1A	Ras-related protein Rab-1A OS=Homo sapiens OX=9606 GN=RAB1A PE=1 SV=3	52	11	29	4	205	22.7	6.21	54.55	101.9	103.6	121.4	91.5	92.7	88.9	0.132896	0.25942
P35908	KRT2	Keratin, type II cytoskeletal 2 epidermal OS=Homo sapiens OX=9606 GN=KRT2 PE=1 SV=2	24	16	25	8	639	65.4	8	35.25	212.2	64.3	65.3	82.3	72.7	103.2	0.643991	0.404663
Q99873	PRMT1	Protein arginine N-methyltransferase 1 OS=Homo sapiens OX=9606 GN=PRMT1 PE=1 SV=3	34	14	20	14	371	42.4	5.35	23.4	98.3	106.1	119.4	92.3	93.3	90.6	0.143397	0.22939
P35611	ADD1	Alpha-adducin OS=Homo sapiens OX=9606 GN=ADD1 PE=1 SV=2	20	12	18	11	737	80.9	5.83	26.62	104.7	82	86	112.7	110.2	104.4	0.0891647	-0.263299
P13716	ALAD	Delta-aminolevulinic acid dehydratase OS=Homo sapiens OX=9606 GN=ALAD PE=1 SV=1	34	9	19	9	330	36.3	6.79	50.33	92.5	78.7	80.5	124.9	123.4	100	0.0474457	-0.468625
P38606	ATP6V1A	V-type proton ATPase catalytic subunit A OS=Homo sapiens OX=9606 GN=ATP6V1A PE=1 SV=2	22	12	22	12	617	68.3	5.52	41.76	102.4	100.9	111.6	88.7	101.5	94.9	0.203795	0.143426
O95171	SCEL	Sciellin OS=Homo sapiens OX=9606 GN=SCEL PE=1 SV=2	30	17	19	17	688	77.5	9.38	18.88	122.8	101.8	61.9	113.7	103.3	96.5	0.564667	-0.12993
Q9HC38	GLOD4	Glyoxalase domain-containing protein 4 OS=Homo sapiens OX=9606 GN=GLOD4 PE=1 SV=1	37	11	22	11	313	34.8	5.6	38.09	105.6	95.8	107.4	104.6	96.8	89.7	0.424484	0.0851579
P13645	KRT10	Keratin, type I cytoskeletal 10 OS=Homo sapiens OX=9606 GN=KRT10 PE=1 SV=6	29	16	26	13	584	58.8	5.21	39.03	210.4	69.3	65.3	77.8	70.9	106.3	0.625646	0.436099
P23634	ATP2B4	Plasma membrane calcium-transporting ATPase 4 OS=Homo sapiens OX=9606 GN=ATP2B4 PE=1 SV=2	13	12	16	6	1241	137.8	6.6	32.63	110.4	92.5	94.9	108.3	98.7	95.2	0.612331	-0.0211599
Q6DD88	ATL3	Atlastin-3 OS=Homo sapiens OX=9606 GN=ATL3 PE=1 SV=1	31	14	22	14	541	60.5	5.66	32.48	96.6	111.7	123.1	91.1	90.4	87.1	0.140598	0.303114
P22061	PCMT1	Protein-L-isoaspartate(D-aspartate) O-methyltransferase OS=Homo sapiens OX=9606 GN=PCMT1 PE=1 SV=4	60	10	16	10	227	24.6	7.21	35.38	103.8	92.3	74.5	112.7	116.5	100.2	0.067491	-0.283679
O95831	AIFM1	Apoptosis-inducing factor 1, mitochondrial OS=Homo sapiens OX=9606 GN=AIFM1 PE=1 SV=1	31	14	17	14	613	66.9	8.95	34.05	91.6	182.8	101.5	73.7	71.5	79	0.238093	0.745563
Q7L014	DDX46	Probable ATP-dependent RNA helicase DDX46 OS=Homo sapiens OX=9606 GN=DDX46 PE=1 SV=2	23	19	22	19	1031	117.3	9.29	25.39	92.7	138.6	109.9	87.6	85.3	85.8	0.1888	0.399338
Q13418	ILK	Integrin-linked protein kinase OS=Homo sapiens OX=9606 GN=ILK PE=1 SV=2	28	13	26	13	452	51.4	8.07	45.01	115.4	81.3	83.6	114	101.2	104.5	0.212683	-0.189747
P62753	RPS6	40S ribosomal protein S6 OS=Homo sapiens OX=9606 GN=RPS6 PE=1 SV=1	35	10	28	10	249	28.7	10.84	51.92	100.7	114.5	130.6	82.5	82	89.6	0.0442455	0.444541
P01011	SERPINA3	Alpha-1-antichymotrypsin OS=Homo sapiens OX=9606 GN=SERPINA3 PE=1 SV=2	24	9	25	9	423	47.6	5.52	34.86	73.9	87.1	70.1	91.2	141.1	136.5	0.0895109	-0.674321
O60664	PLIN3	Perilipin-3 OS=Homo sapiens OX=9606 GN=PLIN3 PE=1 SV=3	38	13	18	13	434	47	5.44	25.85	96.8	110.1	117.7	88.5	88	99	0.0587183	0.236611
P25786	PSMA1	Proteasome subunit alpha type-1 OS=Homo sapiens OX=9606 GN=PSMA1 PE=1 SV=1	37	10	25	10	263	29.5	6.61	52.19	97.9	117.3	105.2	91.1	96.2	92.3	0.0815981	0.19651
P15880	RPS2	40S ribosomal protein S2 OS=Homo sapiens OX=9606 GN=RPS2 PE=1 SV=2	34	10	22	10	293	31.3	10.24	52.16	97.5	121.6	132.7	79.8	82.8	85.7	0.0584366	0.502671
P35270	SPR	Sepiapterin reductase OS=Homo sapiens OX=9606 GN=SPR PE=1 SV=1	48	10	15	10	261	28	8.05	30.55	86.3	111.4	139	92	90.8	80.6	0.319492	0.354208
P05107	ITGB2	Integrin beta-2 OS=Homo sapiens OX=9606 GN=ITGB2 PE=1 SV=2	25	17	21	16	769	84.7	6.95	34.59	97.4	100.7	111.3	92	100.7	97.9	0.248697	0.0904385
B5ME19	EIF3CL	Eukaryotic translation initiation factor 3 subunit C-like protein OS=Homo sapiens OX=9606 GN=EIF3CL PE=1 SV=1	18	17	21	17	914	105.4	5.64	32.22	105.4	109.1	110.1	94.6	92.3	88.5	0.034425	0.237134
O75475	PSIP1	PC4 and SFRS1-interacting protein OS=Homo sapiens OX=9606 GN=PSIP1 PE=1 SV=1	35	17	25	16	530	60.1	9.13	30.23	110.8	109.3	95.3	102.9	93.3	88.4	0.0705251	0.148247
Q14112	NID2	Nidogen-2 OS=Homo sapiens OX=9606 GN=NID2 PE=1 SV=3	15	19	22	18	1375	151.2	5.29	27.56	134.5	75.8	78.6	119.4	92.7	99	0.579659	-0.106808
P30040	ERP29	Endoplasmic reticulum resident protein 29 OS=Homo sapiens OX=9606 GN=ERP29 PE=1 SV=4	41	9	25	9	261	29	7.31	49.61	91.8	105.5	134.6	82.8	93.6	91.8	0.188607	0.307439
P43490	NAMPT	Nicotinamide phosphoribosyltransferase OS=Homo sapiens OX=9606 GN=NAMPT PE=1 SV=1	31	14	24	14	491	55.5	7.15	45.84	99	111.8	104.4	93	102.1	89.7	0.0566736	0.146318
P31943	HNRNPH1	Heterogeneous nuclear ribonucleoprotein H OS=Homo sapiens OX=9606 GN=HNRNPH1 PE=1 SV=4	25	11	27	2	449	49.2	6.3	53.17	97.4	121.1	115.7	90	88.1	87.7	0.100567	0.330371
P27338	MAOB	Amine oxidase [flavin-containing] B OS=Homo sapiens OX=9606 GN=MAOB PE=1 SV=3	24	14	19	9	520	58.7	7.5	41.24	113.6	103.9	87.8	100.4	98.2	96.1	0.631371	0.0509805
Q9UL46	PSME2	Proteasome activator complex subunit 2 OS=Homo sapiens OX=9606 GN=PSME2 PE=1 SV=4	37	9	24	9	239	27.4	5.73	32.25	96.1	123.3	102.8	88.1	101.9	87.8	0.062063	0.21391
Q96TA1	NIBAN2	Protein Niban 2 OS=Homo sapiens OX=9606 GN=NIBAN2 PE=1 SV=3	19	14	20	14	746	84.1	6.19	35.5	106.1	90.2	113.4	104	96.3	90	0.538558	0.0933268
P04217	A1BG	Alpha-1B-glycoprotein OS=Homo sapiens OX=9606 GN=A1BG PE=1 SV=4	22	8	31	8	495	54.2	5.86	49.59	92.8	75.5	84.1	113	115.1	119.4	0.0327526	-0.461301
Q7L576	CYFIP1	Cytoplasmic FMR1-interacting protein 1 OS=Homo sapiens OX=9606 GN=CYFIP1 PE=1 SV=1	17	19	26	9	1253	145.1	6.9	35.45	102.3	104.3	96.7	99	101.1	96.5	0.159275	0.0322269
Q9UHG3	PCYOX1	Prenylcysteine oxidase 1 OS=Homo sapiens OX=9606 GN=PCYOX1 PE=1 SV=3	29	13	19	13	505	56.6	6.18	40.25	111.9	75.9	102.9	115.1	107.9	86.3	0.703278	-0.0894758
P29350	PTPN6	Tyrosine-protein phosphatase non-receptor type 6 OS=Homo sapiens OX=9606 GN=PTPN6 PE=1 SV=1	34	19	22	19	595	67.5	7.78	30.42	109.2	93.5	100	99.1	104.9	93.4	0.815655	0.025484
P29144	TPP2	Tripeptidyl-peptidase 2 OS=Homo sapiens OX=9606 GN=TPP2 PE=1 SV=4	13	14	18	14	1249	138.3	6.32	25.74	97.6	99.6	95.8	103.9	103.6	99.4	0.0314236	-0.066868
Q14651	PLS1	Plastin-1 OS=Homo sapiens OX=9606 GN=PLS1 PE=1 SV=2	20	13	22	10	629	70.2	5.41	38.11	92.9	111.7	158.7	83.9	72.6	80.1	0.171086	0.618711
Q96AQ6	PBXIP1	Pre-B-cell leukemia transcription factor-interacting protein 1 OS=Homo sapiens OX=9606 GN=PBXIP1 PE=1 SV=1	19	12	18	12	731	80.6	5.33	29.14	78.6	125.7	179	73.4	65.8	77.5	0.184664	0.822775
Q9BSJ8	ESYT1	Extended synaptotagmin-1 OS=Homo sapiens OX=9606 GN=ESYT1 PE=1 SV=1	16	15	22	14	1104	122.8	5.83	34.48	97.1	102.8	110.7	98.9	100.4	90.1	0.412036	0.101993
P01861	IGHG4	Immunoglobulin heavy constant gamma 4 OS=Homo sapiens OX=9606 GN=IGHG4 PE=1 SV=1	42	9	66	6	327	35.9	7.36	122.16	74.5	75.1	82.8	96.3	125.3	145.9	0.0661787	-0.661134
P12236	SLC25A6	ADP/ATP translocase 3 OS=Homo sapiens OX=9606 GN=SLC25A6 PE=1 SV=4	32	10	27	1	298	32.8	9.74	45.82	109.3	126	103.2	84.7	87	89.8	0.0741795	0.372345
P46777	RPL5	60S ribosomal protein L5 OS=Homo sapiens OX=9606 GN=RPL5 PE=1 SV=3	30	12	26	12	297	34.3	9.72	37.8	98.1	127.9	133.4	81.3	78.1	81.1	0.0741602	0.579554
P12235	SLC25A4	ADP/ATP translocase 1 OS=Homo sapiens OX=9606 GN=SLC25A4 PE=1 SV=4	33	10	23	4	298	33	9.76	43.45	87.5	102.9	110.3	99.9	97.1	102.2	0.945555	0.00721469
P45974	USP5	Ubiquitin carboxyl-terminal hydrolase 5 OS=Homo sapiens OX=9606 GN=USP5 PE=1 SV=2	22	14	20	14	858	95.7	5.03	22.91	98.2	90.2	99.2	101.3	106.3	104.8	0.173581	-0.119331
P62873	GNB1	Guanine nucleotide-binding protein G(I)/G(S)/G(T) subunit beta-1 OS=Homo sapiens OX=9606 GN=GNB1 PE=1 SV=3	28	9	32	5	340	37.4	6	62.01	113	87.5	92.8	105.9	102.9	97.8	0.565672	-0.0639806
P39019	RPS19	40S ribosomal protein S19 OS=Homo sapiens OX=9606 GN=RPS19 PE=1 SV=2	44	8	25	8	145	16.1	10.32	50.18	98.8	121.3	129.8	82.5	80.6	87	0.0595805	0.484438
P11940	PABPC1	Polyadenylate-binding protein 1 OS=Homo sapiens OX=9606 GN=PABPC1 PE=1 SV=2	24	15	21	11	636	70.6	9.5	39.35	104.6	109.5	125.5	84.1	87.9	88.4	0.0388279	0.383107
Q9UDY2	TJP2	Tight junction protein ZO-2 OS=Homo sapiens OX=9606 GN=TJP2 PE=1 SV=2	17	16	19	16	1190	133.9	7.4	34.94	116.3	89.8	98.1	104.3	98.3	93.2	0.68712	0.0403981
P17980	PSMC3	26S proteasome regulatory subunit 6A OS=Homo sapiens OX=9606 GN=PSMC3 PE=1 SV=3	32	11	18	11	439	49.2	5.24	29.88	96.6	111.3	108.9	97.7	94.3	91.2	0.21034	0.161751
Q16666	IFI16	Gamma-interferon-inducible protein 16 OS=Homo sapiens OX=9606 GN=IFI16 PE=1 SV=3	20	14	21	13	785	88.2	9.28	25.87	101.4	104.9	102	94.3	100.7	96.6	0.0220867	0.0803442
P20591	MX1	Interferon-induced GTP-binding protein Mx1 OS=Homo sapiens OX=9606 GN=MX1 PE=1 SV=4	26	15	21	14	662	75.5	5.83	36.7	87.5	173.7	55.4	80.2	138.4	64.8	0.485455	0.159821
O95833	CLIC3	Chloride intracellular channel protein 3 OS=Homo sapiens OX=9606 GN=CLIC3 PE=1 SV=2	58	11	26	11	236	26.6	6.43	37.1	91.5	86.2	159.1	93.6	87	82.6	0.444776	0.355733
P09668	CTSH	Pro-cathepsin H OS=Homo sapiens OX=9606 GN=CTSH PE=1 SV=4	19	6	23	6	335	37.4	8.07	60.58	102.8	132.3	108.9	81.5	86.3	88.3	0.0725325	0.425701
P61204	ARF3	ADP-ribosylation factor 3 OS=Homo sapiens OX=9606 GN=ARF3 PE=1 SV=2	43	7	26	3	181	20.6	7.43	57.38	101.7	105.6	128.5	89	90.1	85.1	0.135232	0.345972
P04424	ASL	Argininosuccinate lyase OS=Homo sapiens OX=9606 GN=ASL PE=1 SV=4	30	13	20	13	464	51.6	6.48	34.17	82.9	105.9	132.4	99.4	92	87.4	0.50947	0.204241
Q06210	GFPT1	Glutamine--fructose-6-phosphate aminotransferase [isomerizing] 1 OS=Homo sapiens OX=9606 GN=GFPT1 PE=1 SV=3	25	15	20	15	699	78.8	7.11	30.65	98.3	104.8	143.6	83.8	83.6	85.9	0.146202	0.452841
Q04695	KRT17	Keratin, type I cytoskeletal 17 OS=Homo sapiens OX=9606 GN=KRT17 PE=1 SV=2	26	13	34	4	432	48.1	5.02	52.38	87.4	147.5	78.6	125	64.9	96.6	0.831518	0.12993
P07686	HEXB	Beta-hexosaminidase subunit beta OS=Homo sapiens OX=9606 GN=HEXB PE=1 SV=3	22	12	24	11	556	63.1	6.76	32	89.8	150	113.9	80.3	87.4	78.6	0.144632	0.52211
P51812	RPS6KA3	Ribosomal protein S6 kinase alpha-3 OS=Homo sapiens OX=9606 GN=RPS6KA3 PE=1 SV=1	23	15	20	9	740	83.7	6.89	28.61	103.1	141.7	101.7	81.3	83.9	88.3	0.150567	0.45087
Q13642	FHL1	Four and a half LIM domains protein 1 OS=Homo sapiens OX=9606 GN=FHL1 PE=1 SV=4	36	9	27	9	323	36.2	8.97	38.53	146.3	86.1	75.7	108.2	91.2	92.6	0.778634	0.0774303
O75368	SH3BGRL	SH3 domain-binding glutamic acid-rich-like protein OS=Homo sapiens OX=9606 GN=SH3BGRL PE=1 SV=1	89	9	19	9	114	12.8	5.25	36.96	112.5	99.5	88	95.7	93.6	110.7	1	0
P12268	IMPDH2	Inosine-5'-monophosphate dehydrogenase 2 OS=Homo sapiens OX=9606 GN=IMPDH2 PE=1 SV=2	33	13	15	13	514	55.8	6.9	30.49	94.5	125.6	97.9	93.9	98.1	90.1	0.275058	0.17282
O43776	NARS1	Asparagine--tRNA ligase, cytoplasmic OS=Homo sapiens OX=9606 GN=NARS1 PE=1 SV=1	27	13	18	13	548	62.9	6.25	25.87	97	102.2	110.9	96.2	98.5	95.2	0.277862	0.0971782
P36776	LONP1	Lon protease homolog, mitochondrial OS=Homo sapiens OX=9606 GN=LONP1 PE=1 SV=2	16	14	18	14	959	106.4	6.39	20.68	98.8	118	115.1	87.8	91.5	88.9	0.0534688	0.307439
O95425	SVIL	Supervillin OS=Homo sapiens OX=9606 GN=SVIL PE=1 SV=2	9	16	19	16	2214	247.6	6.98	24.16	93.8	114.2	111.2	97.7	91.1	91.9	0.267686	0.185432
P21796	VDAC1	Voltage-dependent anion-selective channel protein 1 OS=Homo sapiens OX=9606 GN=VDAC1 PE=1 SV=2	37	10	22	9	283	30.8	8.54	45.4	98.1	147.2	102.7	84.3	87.5	80.1	0.150451	0.466236
Q86UE4	MTDH	Protein LYRIC OS=Homo sapiens OX=9606 GN=MTDH PE=1 SV=2	22	12	20	12	582	63.8	9.32	30.25	103.9	116.5	121.5	84.7	87.3	86.1	0.0273761	0.405644
P22307	SCP2	Non-specific lipid-transfer protein OS=Homo sapiens OX=9606 GN=SCP2 PE=1 SV=2	23	14	20	14	547	59	6.89	29.42	95.1	127.7	111.2	89.1	91	85.9	0.127124	0.328422
P40763	STAT3	Signal transducer and activator of transcription 3 OS=Homo sapiens OX=9606 GN=STAT3 PE=1 SV=2	22	15	21	15	770	88	6.3	33.07	97.1	112.7	103.6	97.6	94.7	94.3	0.236532	0.128967
P04439	HLA-A	HLA class I histocompatibility antigen, A alpha chain OS=Homo sapiens OX=9606 GN=HLA-A PE=1 SV=2	32	8	28	4	365	40.8	6	45.18	111	102.6	94.9	99.4	94.1	98.1	0.337713	0.0812798
Q9H0U4	RAB1B	Ras-related protein Rab-1B OS=Homo sapiens OX=9606 GN=RAB1B PE=1 SV=1	46	10	29	3	201	22.2	5.73	58.73	102.6	116	129.1	84.2	82.4	85.8	0.0482949	0.462131
[truncated: 3,183 more rows]
