# Supplementary material for: Integrated multi-omics analysis for lung adenocarcinoma in Xuanwei, China
Source: Aging (Albany NY). 2023 Dec 13;15(23):14263–91. doi: 10.18632/aging.205300 (PMC10756121; doi:10.18632/aging.205300)
Supplement: Supplementary Table 4 [file aging-15-205300-s005.xlsx]

## Sheet: Sheet1
Supplementary Table 4. Phosphoproteomic profiles of six samples.
Sheet	Description
Supplementary Table 4A	A list of phosphosites and their relative intensities in LUAD and non-tumor samples.
Supplementary Table 4B	High confidence phosphosites obtained after filtering.

## Sheet: Supplementary Table 4A
Proteins	Positions within proteins	Leading proteins	Protein	Fasta headers	Localization prob	PEP	Delta score	Number of Phospho (STY)	Amino acid	Sequence window	Modification window	Peptide window coverage	Phospho (STY) Probabilities	Position in peptide	Charge	Mass error [ppm]	Reverse	Potential contaminant	MS/MS IDs	Best localization MS/MS ID	Ca1	Ca2	Ca3	P1	P2	P3
sp|P02768|ALBU_HUMAN;CON__P02768-1	82;82	sp|P02768|ALBU_HUMAN	sp|P02768|ALBU_HUMAN	>sp|P02768|ALBU_HUMAN Serum albumin OS=Homo sapiens OX=9606 GN=ALB PE=1 SV=2;>P02768-1 SWISS-PROT:P02768-1 Tax_Id=9606 Gene_Symbol=ALB Isoform 1 of Serum albumin precursor	1	1.11e-21	131.96	1	S	VNEVTEFAKTCVADESAENCDKSLHTLFGDK	X;X;X;X;X;X;X;X;X;X;X;X;X;X;X;Phospho (STY);X;X;X;X;X;X;X;X;X;X;X;X;X;X;X	XXXXXXXXXPPPPPPPPPPPPPXXXXXXXXX	TCVADES(1)AENCDK	7	3	-0.62129		+	18110;18111;18112;18113;18114;18115;18116;18117;18118	18116	123800	117630	113530	135230	109990	130090
sp|P05787|K2C8_HUMAN;CON__P05787;sp|O95678|K2C75_HUMAN;CON__Q8BGZ7;CON__O95678;CON__Q922U2;CON__Q5XQN5	274;274;334;335;334;347;354	sp|P05787|K2C8_HUMAN	sp|P05787|K2C8_HUMAN	>sp|P05787|K2C8_HUMAN Keratin, type II cytoskeletal 8 OS=Homo sapiens OX=9606 GN=KRT8 PE=1 SV=7;>P05787 SWISS-PROT:P05787 Tax_Id=9606 Gene_Symbol=KRT8 Keratin, type II cytoskeletal 8;>sp|O95678|K2C75_HUMAN Keratin, type II cytoskeletal 75 OS=Homo sapiens O	0.999991	0.00438	46.498	1	S	IIAEVKAQYEDIANRSRAEAESMYQIKYEEL	X;X;X;X;X;X;X;X;X;X;X;X;X;X;X;Phospho (STY);X;X;X;X;X;X;X;X;X;X;X;X;X;X;X	XXXXXXPPPPPPPPPPPXXXXXXXXXXXXXX	AQYEDIANRS(1)R	10	2	2.6039		+	1630	1630	6156.8	9867.4	10061	4678.4	3907	4339.2
sp|P05787|K2C8_HUMAN;CON__P05787	34;34	sp|P05787|K2C8_HUMAN	sp|P05787|K2C8_HUMAN	>sp|P05787|K2C8_HUMAN Keratin, type II cytoskeletal 8 OS=Homo sapiens OX=9606 GN=KRT8 PE=1 SV=7;>P05787 SWISS-PROT:P05787 Tax_Id=9606 Gene_Symbol=KRT8 Keratin, type II cytoskeletal 8	0.412403	0.00380755	24.928		S	AFSSRSYTSGPGSRISSSSFSRVGSSNFRGG	X;X;X;X;X;Phospho (STY);X;X;X;X;X;X;X;X;X;Phospho (STY);X;X;X;X;X;X;X;X;Phospho (STY);Phospho (STY);X;X;X;X;X	XXXXXXXXXXXXXXPPPPPPPPXXXXXXXXX	IS(0.412)S(0.412)S(0.133)S(0.043)FSR	2	2	-0.083985		+		8174	0	0	0	0	0	0
sp|P05787|K2C8_HUMAN;CON__P05787	35;35	sp|P05787|K2C8_HUMAN	sp|P05787|K2C8_HUMAN	>sp|P05787|K2C8_HUMAN Keratin, type II cytoskeletal 8 OS=Homo sapiens OX=9606 GN=KRT8 PE=1 SV=7;>P05787 SWISS-PROT:P05787 Tax_Id=9606 Gene_Symbol=KRT8 Keratin, type II cytoskeletal 8	0.964449	0.00287856	35.54	1	S	FSSRSYTSGPGSRISSSSFSRVGSSNFRGGL	X;X;X;X;Phospho (STY);X;X;X;X;X;X;X;X;X;X;Phospho (STY);X;X;X;X;X;X;X;Phospho (STY);Phospho (STY);X;X;X;X;X;X	XXXXXXXXXXXXXPPPPPPPPXXXXXXXXXX	IS(0.024)S(0.964)S(0.011)S(0.001)FSR	3	2	1.0301		+	8173;8177	8173	26948	114460	66422	21381	23754	18273
sp|P05787|K2C8_HUMAN;CON__P05787	37;37	sp|P05787|K2C8_HUMAN	sp|P05787|K2C8_HUMAN	>sp|P05787|K2C8_HUMAN Keratin, type II cytoskeletal 8 OS=Homo sapiens OX=9606 GN=KRT8 PE=1 SV=7;>P05787 SWISS-PROT:P05787 Tax_Id=9606 Gene_Symbol=KRT8 Keratin, type II cytoskeletal 8	0.997268	9.57e-05	32.972	1	S	SRSYTSGPGSRISSSSFSRVGSSNFRGGLGG	X;X;Phospho (STY);X;X;X;X;X;X;X;X;X;X;X;X;Phospho (STY);X;X;X;X;X;Phospho (STY);Phospho (STY);X;X;X;X;X;X;X;X	XXXXXXXXXXXPPPPPPPPXXXXXXXXXXXX	ISSS(0.003)S(0.997)FSR	5	2	0.095887		+	8172;8175;8176	8175	34240	118150	65322	16253	21098	13819
sp|P05787|K2C8_HUMAN;CON__P05787	475;475	sp|P05787|K2C8_HUMAN	sp|P05787|K2C8_HUMAN	>sp|P05787|K2C8_HUMAN Keratin, type II cytoskeletal 8 OS=Homo sapiens OX=9606 GN=KRT8 PE=1 SV=7;>P05787 SWISS-PROT:P05787 Tax_Id=9606 Gene_Symbol=KRT8 Keratin, type II cytoskeletal 8	0.973884	1.23e-07	108.79	1	S	AVVVKKIETRDGKLVSESSDVLPK_______	X;X;X;X;X;X;X;X;X;X;X;X;X;X;X;Phospho (STY);X;X;X;X;X;X;X;X;X;X;X;X;X;X;X	XXXXXXXXXXXXXPPPPPPPPPPPXXXXXXX	LVS(0.974)ES(0.026)SDVLPK	3	3	0.054856		+	11298;11299;11300	11300	11444	49475	38443	6352	14683	14168
sp|P05787|K2C8_HUMAN;CON__P05787;CON__H-INV:HIT000292931	253;253;213	sp|P05787|K2C8_HUMAN	sp|P05787|K2C8_HUMAN	>sp|P05787|K2C8_HUMAN Keratin, type II cytoskeletal 8 OS=Homo sapiens OX=9606 GN=KRT8 PE=1 SV=7;>P05787 SWISS-PROT:P05787 Tax_Id=9606 Gene_Symbol=KRT8 Keratin, type II cytoskeletal 8;>H-INV:HIT000292931 Tax_Id=9606 Gene_Symbol=- Similar to Keratin, type II	0.999941	4.29e-09	96.833	1	S	QISDTSVVLSMDNSRSLDMDSIIAEVKAQYE	X;X;X;X;X;X;X;X;X;X;X;X;X;X;X;Phospho (STY);X;X;X;X;X;X;X;X;X;X;X;X;X;X;X	XXXXXXXXXXXXXXXPPPPPPPPPPPPXXXX	S(1)LDMDSIIAEVK	1	3	-0.42643		+	15930;15933	15933	10299	16917	24780	5551.5	5815.5	6075.5
sp|P05787|K2C8_HUMAN;CON__P05787;CON__H-INV:HIT000292931	258;258;218	sp|P05787|K2C8_HUMAN	sp|P05787|K2C8_HUMAN	>sp|P05787|K2C8_HUMAN Keratin, type II cytoskeletal 8 OS=Homo sapiens OX=9606 GN=KRT8 PE=1 SV=7;>P05787 SWISS-PROT:P05787 Tax_Id=9606 Gene_Symbol=KRT8 Keratin, type II cytoskeletal 8;>H-INV:HIT000292931 Tax_Id=9606 Gene_Symbol=- Similar to Keratin, type II	0.997928	0.00099238	42.979	1	S	SVVLSMDNSRSLDMDSIIAEVKAQYEDIANR	X;X;X;X;X;X;X;X;X;X;X;X;X;X;X;Phospho (STY);X;X;X;X;X;X;X;X;X;X;X;X;X;X;X	XXXXXXXXXXPPPPPPPPPPPPXXXXXXXXX	S(0.002)LDMDS(0.998)IIAEVK	6	3	0.39092		+	15931;15932	15932	6575.7	9537	12829	4102.7	3404.1	3804
sp|P05787|K2C8_HUMAN;CON__P05787	24;24	sp|P05787|K2C8_HUMAN	sp|P05787|K2C8_HUMAN	>sp|P05787|K2C8_HUMAN Keratin, type II cytoskeletal 8 OS=Homo sapiens OX=9606 GN=KRT8 PE=1 SV=7;>P05787 SWISS-PROT:P05787 Tax_Id=9606 Gene_Symbol=KRT8 Keratin, type II cytoskeletal 8	0.991196	0.00149652	74.475	1	S	SYKVSTSGPRAFSSRSYTSGPGSRISSSSFS	X;X;X;X;X;X;X;X;X;X;X;X;X;X;X;Phospho (STY);X;X;X;X;X;X;X;X;X;Phospho (STY);Phospho (STY);X;Phospho (STY);X;X	XXXXXXXXXXXXXXXPPPPPPPPPXXXXXXX	S(0.991)YT(0.007)S(0.001)GPGSR	1	2	-0.2764		+	17936;17937;17938	17936	41212	127620	99075	26928	30938	22758
sp|P05787|K2C8_HUMAN;CON__P05787	43;43	sp|P05787|K2C8_HUMAN	sp|P05787|K2C8_HUMAN	>sp|P05787|K2C8_HUMAN Keratin, type II cytoskeletal 8 OS=Homo sapiens OX=9606 GN=KRT8 PE=1 SV=7;>P05787 SWISS-PROT:P05787 Tax_Id=9606 Gene_Symbol=KRT8 Keratin, type II cytoskeletal 8	0.70937	0.0116234	53.039	1	S	GPGSRISSSSFSRVGSSNFRGGLGGGYGGAS	X;X;X;X;X;X;Phospho (STY);Phospho (STY);X;Phospho (STY);X;X;X;X;X;Phospho (STY);X;X;X;X;X;X;X;X;X;X;X;X;X;X;X	XXXXXXXXXXXXXPPPPPPPXXXXXXXXXXX	VGS(0.709)S(0.291)NFR	3	2	-0.093302		+	19718	19718	7254	33464	16244	3144.8	4554.1	4087.2
sp|P05787|K2C8_HUMAN;CON__P05787	44;44	sp|P05787|K2C8_HUMAN	sp|P05787|K2C8_HUMAN	>sp|P05787|K2C8_HUMAN Keratin, type II cytoskeletal 8 OS=Homo sapiens OX=9606 GN=KRT8 PE=1 SV=7;>P05787 SWISS-PROT:P05787 Tax_Id=9606 Gene_Symbol=KRT8 Keratin, type II cytoskeletal 8	0.757404	0.0107854	61.769	1	S	PGSRISSSSFSRVGSSNFRGGLGGGYGGASG	X;X;X;X;X;Phospho (STY);Phospho (STY);X;Phospho (STY);X;X;X;X;X;X;Phospho (STY);X;X;X;X;X;X;X;X;X;X;X;X;X;X;X	XXXXXXXXXXXXPPPPPPPXXXXXXXXXXXX	VGS(0.243)S(0.757)NFR	4	2	-0.23752		+	19716;19717	19717	11136	61716	30281	5775	8677.9	7035.5
CON__P08727;sp|P08727|K1C19_HUMAN;CON__P19001	35;35;35	CON__P08727	CON__P08727	>P08727 SWISS-PROT:P08727 Tax_Id=9606 Gene_Symbol=KRT19 Keratin, type I cytoskeletal 19;>sp|P08727|K1C19_HUMAN Keratin, type I cytoskeletal 19 OS=Homo sapiens OX=9606 GN=KRT19 PE=1 SV=4;>P19001 SWISS-PROT:P19001 Tax_Id=10090 Gene_Symbol=Krt19 Keratin, type	0.9999	0.000161853	83.092	1	S	GGSVRFGPGVAFRAPSIHGGSGGRGVSVSSA	X;X;Phospho (STY);X;X;X;X;X;X;X;X;X;X;X;X;Phospho (STY);X;X;X;X;X;X;X;X;X;X;X;X;Phospho (STY);Phospho (STY);X	XXXXXXXXXXXXXPPPPPPPPPPPXXXXXXX	APS(1)IHGGSGGR	3	2	-0.44989		+	1480;1482;1484	1482	28201	28991	72659	13761	13619	14449
CON__P08727;sp|P08727|K1C19_HUMAN;CON__P19001	40;40;40	CON__P08727	CON__P08727	>P08727 SWISS-PROT:P08727 Tax_Id=9606 Gene_Symbol=KRT19 Keratin, type I cytoskeletal 19;>sp|P08727|K1C19_HUMAN Keratin, type I cytoskeletal 19 OS=Homo sapiens OX=9606 GN=KRT19 PE=1 SV=4;>P19001 SWISS-PROT:P19001 Tax_Id=10090 Gene_Symbol=Krt19 Keratin, type	0.999913	0.00103888	48.595	1	S	FGPGVAFRAPSIHGGSGGRGVSVSSARFVSS	X;X;X;X;X;X;X;X;X;X;X;X;X;X;X;Phospho (STY);X;X;X;X;X;X;X;Phospho (STY);Phospho (STY);X;X;X;X;X;X	XXXXXXXXPPPPPPPPPPPXXXXXXXXXXXX	APSIHGGS(1)GGR	8	2	0.55496		+	1478;1479;1481;1483	1479	27324	45535	37450	18005	17930	14313
CON__P08727	57	CON__P08727	CON__P08727	>P08727 SWISS-PROT:P08727 Tax_Id=9606 Gene_Symbol=KRT19 Keratin, type I cytoskeletal 19	0.446409	7.72e-28	108.94		S	GRGVSVSSARFVSSSSSGGYGGGYGGVLTAS	X;X;X;X;X;X;Phospho (STY);Phospho (STY);X;X;X;X;X;X;X;Phospho (STY);X;X;X;X;X;X;X;X;X;X;X;X;X;X;X	XXXXXXXXXXPPPPPPPPPPPPPPPPPPPPP	FVS(0.004)S(0.017)S(0.086)S(0.446)S(0.446)GGYGGGYGGVLTASDGLLAGNEK	6	4	0.31938		+		5584	0	0	0	0	0	0
CON__P08727	58	CON__P08727	CON__P08727	>P08727 SWISS-PROT:P08727 Tax_Id=9606 Gene_Symbol=KRT19 Keratin, type I cytoskeletal 19	0.480227	7.72e-28	108.94		S	RGVSVSSARFVSSSSSGGYGGGYGGVLTASD	X;X;X;X;X;Phospho (STY);Phospho (STY);X;X;X;X;X;X;X;X;Phospho (STY);X;X;X;X;X;X;X;X;X;X;X;X;X;X;X	XXXXXXXXXPPPPPPPPPPPPPPPPPPPPPP	FVS(0.005)S(0.022)S(0.092)S(0.4)S(0.48)GGYGGGYGGVLTASDGLLAGNEK	7	4	-1.1437		+		5588	0	0	0	0	0	0
CON__P08727	72	CON__P08727	CON__P08727	>P08727 SWISS-PROT:P08727 Tax_Id=9606 Gene_Symbol=KRT19 Keratin, type I cytoskeletal 19	0.670936	5.36e-22	103.15	1	S	SSGGYGGGYGGVLTASDGLLAGNEKLTMQNL	X;X;X;X;X;X;X;X;X;X;X;X;X;X;X;Phospho (STY);X;X;X;X;X;X;X;X;X;X;X;X;X;X;X	PPPPPPPPPPPPPPPPPPPPPPPPPXXXXXX	FVSSSSSGGYGGGY(0.011)GGVLT(0.318)AS(0.671)DGLLAGNEK	21	4	-1.1784		+	5585	5585	6980.6	11048	11305	5002.5	5077.5	4910.5
CON__P08727;sp|P08727|K1C19_HUMAN	48;48	CON__P08727	CON__P08727	>P08727 SWISS-PROT:P08727 Tax_Id=9606 Gene_Symbol=KRT19 Keratin, type I cytoskeletal 19;>sp|P08727|K1C19_HUMAN Keratin, type I cytoskeletal 19 OS=Homo sapiens OX=9606 GN=KRT19 PE=1 SV=4	0.466988	0.00460359	66.108		S	APSIHGGSGGRGVSVSSARFVSSSSSGGYGG	X;X;Phospho (STY);X;X;X;X;Phospho (STY);X;X;X;X;X;X;X;Phospho (STY);X;X;X;X;X;X;X;X;Phospho (STY);Phospho (STY);X;X;X;X;X	XXXXXXXXXXXPPPPPPPPXXXXXXXXXXXX	GVS(0.429)VS(0.467)S(0.104)AR	5	2	-0.46115		+		7434	0	0	0	0	0	0
CON__P08727;sp|P08727|K1C19_HUMAN	49;49	CON__P08727	CON__P08727	>P08727 SWISS-PROT:P08727 Tax_Id=9606 Gene_Symbol=KRT19 Keratin, type I cytoskeletal 19;>sp|P08727|K1C19_HUMAN Keratin, type I cytoskeletal 19 OS=Homo sapiens OX=9606 GN=KRT19 PE=1 SV=4	0.543512	0.00664253	57.182	1	S	PSIHGGSGGRGVSVSSARFVSSSSSGGYGGG	X;Phospho (STY);X;X;X;X;Phospho (STY);X;X;X;X;X;X;X;X;Phospho (STY);X;X;X;X;X;X;X;Phospho (STY);Phospho (STY);X;X;X;X;X;X	XXXXXXXXXXPPPPPPPPXXXXXXXXXXXXX	GVS(0.071)VS(0.385)S(0.544)AR	6	2	0.26623		+	7433	7433	5060.1	19913	17198	4006	4528.5	3454.7
CON__P08727;sp|P08727|K1C19_HUMAN	10;10	CON__P08727	CON__P08727	>P08727 SWISS-PROT:P08727 Tax_Id=9606 Gene_Symbol=KRT19 Keratin, type I cytoskeletal 19;>sp|P08727|K1C19_HUMAN Keratin, type I cytoskeletal 19 OS=Homo sapiens OX=9606 GN=KRT19 PE=1 SV=4	0.964906	1.86e-14	107.32	1	S	______MTSYSYRQSSATSSFGGLGGGSVRF	X;X;X;X;X;X;X;X;X;X;X;X;X;X;X;Phospho (STY);X;X;X;X;X;X;X;X;X;X;X;X;X;X;X	XXXXXXXXXXXXXPPPPPPPPPPPPPPPPPX	QS(0.026)S(0.965)AT(0.007)S(0.002)SFGGLGGGSVR	3	2	0.44058		+	12856;12858;12860	12858	36380	82260	63779	28292	27466	24652
CON__P08727;sp|P08727|K1C19_HUMAN	22;22	CON__P08727	CON__P08727	>P08727 SWISS-PROT:P08727 Tax_Id=9606 Gene_Symbol=KRT19 Keratin, type I cytoskeletal 19;>sp|P08727|K1C19_HUMAN Keratin, type I cytoskeletal 19 OS=Homo sapiens OX=9606 GN=KRT19 PE=1 SV=4	0.995622	5.09e-06	62.808	1	S	RQSSATSSFGGLGGGSVRFGPGVAFRAPSIH	X;X;X;X;X;X;X;X;X;X;X;X;X;X;X;Phospho (STY);X;X;X;X;X;X;X;X;X;X;X;X;Phospho (STY);X;X	XPPPPPPPPPPPPPPPPPXXXXXXXXXXXXX	QSSATS(0.001)S(0.003)FGGLGGGS(0.996)VR	15	3	-0.54363		+	12857;12859	12857	18430	30368	23539	14389	12964	11508
CON__P08727;sp|P08727|K1C19_HUMAN	395;395	CON__P08727	CON__P08727	>P08727 SWISS-PROT:P08727 Tax_Id=9606 Gene_Symbol=KRT19 Keratin, type I cytoskeletal 19;>sp|P08727|K1C19_HUMAN Keratin, type I cytoskeletal 19 OS=Homo sapiens OX=9606 GN=KRT19 PE=1 SV=4	0.968588	1.04e-14	102.44	1	S	YRSLLEGQEDHYNNLSASKVL__________	X;X;X;X;X;X;X;X;X;X;X;X;X;X;X;Phospho (STY);X;X;X;X;X;X;X;X;X;X;X;X;X;X;X	XXPPPPPPPPPPPPPPPPPXXXXXXXXXXXX	SLLEGQEDHYNNLS(0.969)AS(0.031)K	14	3	-0.12708		+	16058;16059;16060	16058	30366	53591	56898	25064	25193	27773
sp|P08729|K2C7_HUMAN;CON__Q3KNV1;CON__P08729	254;254;254	sp|P08729|K2C7_HUMAN	sp|P08729|K2C7_HUMAN	>sp|P08729|K2C7_HUMAN Keratin, type II cytoskeletal 7 OS=Homo sapiens OX=9606 GN=KRT7 PE=1 SV=5;>Q3KNV1 TREMBL:Q3KNV1;Q96GE1 Tax_Id=9606 Gene_Symbol=KRT7 keratin 7;>P08729 SWISS-PROT:P08729 Tax_Id=9606 Gene_Symbol=KRT7 Keratin, type II cytoskeletal 7	1	6.74e-07	90.692	1	S	QISDTSVVLSMDNSRSLDLDGIIAEVKAQYE	X;X;X;X;X;X;X;X;X;X;X;X;X;X;X;Phospho (STY);X;X;X;X;X;X;X;X;X;X;X;X;X;X;X	XXXXXXXXXXXXXXXPPPPPPPPPPPPXXXX	S(1)LDLDGIIAEVK	1	3	-0.53238		+	15927;15928;15929	15929	6325.6	14184	19322	4245.1	4189.3	4297.7
CON__P12763;sp|P02765|FETUA_HUMAN	138;138	CON__P12763	CON__P12763	>P12763 SWISS-PROT:P12763 (Bos taurus) Alpha-2-HS-glycoprotein precursor;>sp|P02765|FETUA_HUMAN Alpha-2-HS-glycoprotein OS=Homo sapiens OX=9606 GN=AHSG PE=1 SV=2	0.999999	1.44e-28	171.91	1	S	GQFSVLFTKCDSSPDSAEDVRKLCPDCPLLA	X;X;X;X;X;X;X;X;X;X;X;X;X;X;X;Phospho (STY);X;X;X;X;X;X;X;X;X;X;X;X;X;X;X	XXXXXXXXXPPPPPPPPPPPPPXXXXXXXXX	CDSSPDS(1)AEDVR	7	3	-0.63667		+	2337;2338;2339;2340;2341;2342;2343;2344;2345;2346;2347;2348;2349;2350;2351;2352	2338	156610	158520	150510	175560	132530	146130
		REV__sp|O14657|TOR1B_HUMAN	REV__sp|O14657|TOR1B_HUMAN		1	0.054166	19.214	2	S		X;X;X;X;X;X;X;X;X;X;X;X;X;X;X;Phospho (STY);Phospho (STY);X;X;X;X;X;X;X;X;X;X;X;X;X;X	XXXXXXXXXXXXXPPPPPPPPXXXXXXXXXX	GDS(1)Y(1)KIER	3	2	-1.8636	+		5842	5842	13984	4878.7	4478.2	12454	3629.9	9170.1
		REV__sp|O15018|PDZD2_HUMAN	REV__sp|O15018|PDZD2_HUMAN		1	0.0092477	45.602	1	S		X;X;X;X;X;X;X;X;X;X;X;X;X;X;X;Phospho (STY);X;X;X;X;X;X;X;X;X;X;X;X;X;X;X	XXXXXXXXXXXXXXPPPPPPPXXXXXXXXXX	GS(1)LNSEK	2	2	3.0919	+		7025;7026;7027	7027	66790	86547	70848	52955	43102	42456
		REV__sp|O75074|LRP3_HUMAN	REV__sp|O75074|LRP3_HUMAN		1	0.038961	15.303	1	S		X;X;X;X;X;X;X;X;X;X;X;X;X;X;X;Phospho (STY);X;X;X;X;X;X;X;X;X;X;X;X;X;X;X	XXXXXXXXXXXPPPPPPPXXXXXXXXXXXXX	AGPAS(1)PR	5	2	-0.0061503	+		914;915;916	916	20601	50791	32368	18815	21107	14318
		REV__sp|O75475|PSIP1_HUMAN	REV__sp|O75475|PSIP1_HUMAN		1	0.054166	7.1306	3	S		X;X;X;X;X;X;X;X;X;X;X;X;X;X;Phospho (STY);Phospho (STY);X;Phospho (STY);X;X;X;X;X;X;X;X;X;X;X;X;X	XXXXXXXXXXXXXXPPPPPPPPPXXXXXXXX	T(1)S(1)GT(1)QKEEK	2	3	2.1324	+		18969	18969	20984	25840	27744	14958	11562	11230
		REV__sp|P02686|MBP_HUMAN	REV__sp|P02686|MBP_HUMAN		0.993184	0.0214593	18.731	1	S		X;X;X;X;X;X;X;X;X;X;X;X;X;X;X;Phospho (STY);X;X;X;X;X;X;X;X;X;X;X;X;X;X;X	XXXXXXXXXXXXXXXPPPPPPPXXXXXXXXX	S(0.993)S(0.007)RDGGK	1	2	0.25468	+		17310;17311;17312	17310	22876	49711	33196	14845	13852	11170
		REV__sp|P0C879|YJ018_HUMAN	REV__sp|P0C879|YJ018_HUMAN		0.327911	0.0415332	37.387		S		X;X;X;X;X;X;X;X;X;X;X;X;X;X;X;Phospho (STY);X;X;X;X;X;X;X;X;X;X;X;X;X;X;X	XXXXXXXXXXXXXPPPPPPPXXXXXXXXXXX	S(0.03)PS(0.328)S(0.328)S(0.314)FR	3	2	-0.25081	+			16633	0	0	0	0	0	0
		REV__sp|P0C879|YJ018_HUMAN	REV__sp|P0C879|YJ018_HUMAN		0.327911	0.0415332	37.387		S		X;X;X;X;X;X;X;X;X;X;X;X;X;X;X;X;X;X;X;X;X;X;X;X;X;X;X;X;X;X;X	XXXXXXXXXXXXXXXXXXXXXXXXXXXXXXX	S(0.03)PS(0.328)S(0.328)S(0.314)FR	4	2	-0.25081	+			16633	0	0	0	0	0	0
		REV__sp|P46663|BKRB1_HUMAN	REV__sp|P46663|BKRB1_HUMAN		0.5	0.054166	9.5238	1	S		X;X;X;X;X;X;X;X;X;X;X;X;X;X;X;X;X;X;X;X;X;X;X;X;X;X;X;X;X;X;X	XXXXXXXXXXXXXXXXXXXXXXXXXXXXXXX	DGGRCRT(0.5)S(0.5)VER	8	2	-4.223	+		2616	2616	9344.1	1798.5	3361.4	7314.8	1153	6402.8
		REV__sp|Q149M9|NWD1_HUMAN	REV__sp|Q149M9|NWD1_HUMAN		0.5	0.054166	19.574	1	S		X;X;X;X;X;X;X;X;X;X;X;X;X;X;X;Phospho (STY);X;Oxidation (M);X;X;X;X;X;X;X;X;X;X;X;X;X	XXXXXXXXXXXXXPPPPPPPXXXXXXXXXXX	EIS(0.5)S(0.5)MHK	3	2	-1.6352	+		4122	4122	9911.5	26634	20578	7129.9	7853.6	6870.5
		REV__sp|Q149M9|NWD1_HUMAN	REV__sp|Q149M9|NWD1_HUMAN		0.5	0.054166	19.574	1	S		X;X;X;X;X;X;X;X;X;X;X;X;X;X;X;X;X;X;X;X;X;X;X;X;X;X;X;X;X;X;X	XXXXXXXXXXXXXXXXXXXXXXXXXXXXXXX	EIS(0.5)S(0.5)MHK	4	2	-1.6352	+		4122	4122	9911.5	26634	20578	7129.9	7853.6	6870.5
		REV__sp|Q15027|ACAP1_HUMAN	REV__sp|Q15027|ACAP1_HUMAN		0.967632	0.0370774	23.938	1	S		X;X;X;X;X;X;X;X;X;X;X;X;X;X;X;Phospho (STY);X;X;X;X;X;X;X;X;X;X;X;X;X;X;X	XXXXXXXXXXXXXXPPPPPPPXXXXXXXXXX	AS(0.968)AALY(0.032)R	2	2	0.86648	+		1681	1681	9394.6	33903	18944	6850.8	10736	7173.2
		REV__sp|Q1MSJ5|CSPP1_HUMAN	REV__sp|Q1MSJ5|CSPP1_HUMAN		0.997571	0.00544645	27.613	2	S		X;X;X;X;X;X;X;X;X;X;X;X;X;X;X;Phospho (STY);X;X;X;X;X;X;X;Phospho (STY);X;X;X;X;X;X;X	XXXXXXXXXXXXXXXPPPPPPPPPPPPXXXX	S(0.998)EVRQKFES(0.501)S(0.501)EK	1	4	0.6878	+		15275	15275	15018	23301	18429	11876	12156	12224
		REV__sp|Q1MSJ5|CSPP1_HUMAN	REV__sp|Q1MSJ5|CSPP1_HUMAN		0.501215	0.00544645	27.613	2	S		X;X;X;X;X;X;X;Phospho (STY);X;X;X;X;X;X;X;Phospho (STY);X;X;X;X;X;X;X;X;X;X;X;X;X;X;X	XXXXXXXPPPPPPPPPPPPXXXXXXXXXXXX	S(0.998)EVRQKFES(0.501)S(0.501)EK	9	4	0.6878	+		15275	15275	15018	23301	18429	11876	12156	12224
		REV__sp|Q1MSJ5|CSPP1_HUMAN	REV__sp|Q1MSJ5|CSPP1_HUMAN		0.501215	0.00544645	27.613	2	S		X;X;X;X;X;X;X;X;X;X;X;X;X;X;X;X;X;X;X;X;X;X;X;X;X;X;X;X;X;X;X	XXXXXXXXXXXXXXXXXXXXXXXXXXXXXXX	S(0.998)EVRQKFES(0.501)S(0.501)EK	10	4	0.6878	+		15275	15275	15018	23301	18429	11876	12156	12224
		REV__sp|Q4G0U5|PCDP1_HUMAN	REV__sp|Q4G0U5|PCDP1_HUMAN		0.695516	0.054166	21.395	2	S		X;X;X;X;X;X;X;X;X;X;X;X;X;X;X;Phospho (STY);Phospho (STY);X;X;X;X;X;X;X;X;X;X;X;X;X;X	XXXXXXXXXXXXXXPPPPPPPPPPXXXXXXX	FS(0.696)T(0.696)Y(0.608)DDQS(0.001)RR	2	2	4.1769	+		5526	5526	897.33	1481.9	950.94	569.65	545.3	357.85
		REV__sp|Q5HYW3|RTL5_HUMAN	REV__sp|Q5HYW3|RTL5_HUMAN		1	0.054166	16.554	1	S		X;X;X;X;X;X;X;X;X;X;X;X;X;X;X;Phospho (STY);X;X;X;X;X;X;X;X;X;X;X;X;X;X;X	XXXXXXXXXXXXXXPPPPPPPPXXXXXXXXX	DS(1)EGEEEK	2	2	-0.31853	+		3103;3104;3105	3105	45235	44173	44828	35561	23314	22977
		REV__sp|Q5TGY3|AHDC1_HUMAN	REV__sp|Q5TGY3|AHDC1_HUMAN		0.52649	0.054166	19.138	3	S		X;X;X;X;X;X;X;X;X;X;X;X;X;X;X;X;X;X;X;X;X;X;X;X;X;X;X;X;X;X;X	XXXXXXXXXXXXXXXXXXXXXXXXXXXXXXX	GT(0.526)S(0.526)VVPT(0.97)QS(0.969)S(0.009)EK	3	3	-0.78356	+		7372	7372	17390	16065	23772	10567	5947.9	8207.3
		REV__sp|Q5TGY3|AHDC1_HUMAN	REV__sp|Q5TGY3|AHDC1_HUMAN		0.968977	0.054166	19.138	3	S		X;X;X;X;X;X;X;X;Phospho (STY);X;X;X;X;Phospho (STY);X;Phospho (STY);X;X;X;X;X;X;X;X;X;X;X;X;X;X;X	XXXXXXXPPPPPPPPPPPPXXXXXXXXXXXX	GT(0.526)S(0.526)VVPT(0.97)QS(0.969)S(0.009)EK	9	3	-0.78356	+		7372	7372	17390	16065	23772	10567	5947.9	8207.3
		REV__sp|Q6PF06|TM10B_HUMAN	REV__sp|Q6PF06|TM10B_HUMAN		0.973655	0.0217689	30.952	1	S		X;X;X;X;X;X;X;X;X;X;X;X;X;X;X;Phospho (STY);X;X;X;X;X;X;X;X;X;X;X;X;X;X;X	XXXXXXXXXXXXPPPPPPPXXXXXXXXXXXX	GGS(0.026)S(0.974)VKK	4	2	0.2491	+		6118	6118	13130	19704	16157	8756.6	12879	7095.6
sp|O43303|CP110_HUMAN	641	REV__sp|Q6ZUS5|CC121_HUMAN	REV__sp|Q6ZUS5|CC121_HUMAN	>sp|O43303|CP110_HUMAN Centriolar coiled-coil protein of 110 kDa OS=Homo sapiens OX=9606 GN=CCP110 PE=1 SV=3	1	0.0111305	14.174	1	S	EQSRRSLRGSINRIVNESHLDKEHDAVEVAD	X;X;X;X;X;X;X;X;X;X;X;X;X;X;X;Phospho (STY);X;X;X;X;X;X;X;X;X;X;X;X;X;X;X	XXXXXXXXXXXXXXPPPPPPPXXXXXXXXXX	ES(1)EELLK	2	2	0.16852			4788	4788	31186	52427	40407	24205	24474	19421
		REV__sp|Q7Z7B0|FLIP1_HUMAN	REV__sp|Q7Z7B0|FLIP1_HUMAN		1	0.0124604	7.839	1	S		X;X;X;X;X;X;X;X;X;X;X;X;X;X;X;Phospho (STY);X;X;X;X;X;X;X;X;X;X;X;X;X;X;X	XXXXXXXXXXXXXXXPPPPPPPXXXXXXXXX	S(1)AEERLR	1	3	-0.48518	+		14722	14722	7935.2	4742.2	3711.1	5289.6	3667.4	3351.4
		REV__sp|Q8IUD2|RB6I2_HUMAN	REV__sp|Q8IUD2|RB6I2_HUMAN		0.560997	0.054166	17.583	1	S		X;X;X;X;X;X;X;X;X;X;X;X;X;X;X;Phospho (STY);X;X;X;X;X;X;Oxidation (M);X;X;X;X;X;X;X;X	XXXXXXXXXXXXXXXPPPPPPPPPPPXXXXX	S(0.561)Y(0.439)VEMKQMEER	1	3	0.45584	+		17939;17940	17940	25362	11063	13596	22563	12462	9284.5
		REV__sp|Q8NGR8|OR1L8_HUMAN	REV__sp|Q8NGR8|OR1L8_HUMAN		0.840424	0.029776	43.214	1	S		X;X;X;X;X;X;X;X;X;X;X;X;X;X;X;Phospho (STY);X;X;X;X;X;X;X;X;X;X;X;X;X;X;X	XXXXXXXXXXXPPPPPPPXXXXXXXXXXXXX	AGS(0.052)T(0.107)S(0.84)PK	5	2	0.040395	+		979;981	979	25835	50090	40181	18294	15373	14053
		REV__sp|Q8TDH9|BL1S5_HUMAN	REV__sp|Q8TDH9|BL1S5_HUMAN		0.333333	0.054166	32.898		S		X;X;X;X;X;X;X;X;X;X;X;X;X;X;X;Phospho (STY);X;X;X;X;Oxidation (M);X;X;X;X;X;X;X;X;X;X	XXXXXXXXXXPPPPPPPPPPPPPXXXXXXXX	LQLVQS(0.333)LS(0.333)RDMT(0.333)R	6	2	3.6816	+			10957	0	0	0	0	0	0
		REV__sp|Q8TDH9|BL1S5_HUMAN	REV__sp|Q8TDH9|BL1S5_HUMAN		0.333333	0.054166	32.898		S		X;X;X;X;X;X;X;X;X;X;X;X;X;X;X;X;X;X;X;X;X;X;X;X;X;X;X;X;X;X;X	XXXXXXXXXXXXXXXXXXXXXXXXXXXXXXX	LQLVQS(0.333)LS(0.333)RDMT(0.333)R	8	2	3.6816	+			10957	0	0	0	0	0	0
		REV__sp|Q969G9|NKD1_HUMAN	REV__sp|Q969G9|NKD1_HUMAN		0.585994	0.0328953	18.977	1	S		X;X;X;X;X;X;X;X;X;X;X;X;X;X;X;Phospho (STY);X;X;X;X;X;X;X;X;X;X;X;X;X;X;X	XXXXXXXXXXXXXXXPPPPPPPXXXXXXXXX	S(0.586)GIT(0.414)GAR	1	2	-0.21252	+		15410	15410	12108	16964	16002	5378	5869.8	4881.7
		REV__sp|Q96K76|UBP47_HUMAN	REV__sp|Q96K76|UBP47_HUMAN		0.589532	0.054166	29.964	2	S		X;X;X;X;X;X;X;X;X;X;X;X;X;X;Phospho (STY);Phospho (STY);X;X;X;X;X;X;X;X;X;X;X;X;X;X;X	XXXXXXXXXXXXXXPPPPPPPXXXXXXXXXX	T(0.484)S(0.59)S(0.565)VS(0.362)LR	2	1	3.5415	+		19064;19065	19065	14098	20264	14226	11759	10323	9133.3
		REV__sp|Q96K76|UBP47_HUMAN	REV__sp|Q96K76|UBP47_HUMAN		0.564647	0.054166	29.964	2	S		X;X;X;X;X;X;X;X;X;X;X;X;X;X;X;X;X;X;X;X;X;X;X;X;X;X;X;X;X;X;X	XXXXXXXXXXXXXXXXXXXXXXXXXXXXXXX	T(0.484)S(0.59)S(0.565)VS(0.362)LR	3	1	3.5415	+		19064;19065	19065	14098	20264	14226	11759	10323	9133.3
		REV__sp|Q96L73|NSD1_HUMAN	REV__sp|Q96L73|NSD1_HUMAN		0.977705	0.0457149	14.565	1	S		X;X;X;X;X;X;X;X;X;X;X;X;X;X;X;Phospho (STY);X;X;X;X;X;X;X;X;X;X;X;X;X;X;X	XXXXXXXXXXXXXXXPPPPPPPXXXXXXXXX	S(0.978)GS(0.022)APLR	1	2	-0.26774	+		15455	15455	7091.9	7118.9	5612.4	3786.6	2620.1	2893.5
		REV__sp|Q96S53|TESK2_HUMAN	REV__sp|Q96S53|TESK2_HUMAN		0.964271	0.0385033	8.7985	1	S		X;X;X;X;X;X;X;X;X;X;X;X;X;X;X;Phospho (STY);X;X;X;X;X;X;X;X;X;X;X;X;X;X;X	XXXXXXXXXXXXXXXPPPPPPPXXXXXXXXX	S(0.964)S(0.036)LWIRR	1	2	4.0087	+		17215	17215	2789.6	13515	13527	1300.4	1539.9	1188.1
		REV__sp|Q9NVQ4|FAIM1_HUMAN	REV__sp|Q9NVQ4|FAIM1_HUMAN		0.5	0.025619	27.823	1	S		X;X;X;X;X;X;X;X;X;X;X;X;X;X;X;X;X;X;X;X;X;X;X;X;X;X;X;X;X;X;X	XXXXXXXXXXXXXXXXXXXXXXXXXXXXXXX	T(0.5)RS(0.5)DEMK	3	3	-0.42728	+		18917	18917	6544.6	12911	12988	4193.2	5475	5450.5
		REV__sp|Q9UPV0|CE164_HUMAN	REV__sp|Q9UPV0|CE164_HUMAN		0.999597	0.000223552	40.639	1	S		X;X;X;X;X;X;X;X;X;X;X;X;X;X;X;Phospho (STY);X;X;X;X;X;X;X;X;X;X;X;X;X;X;X	XXXXXXXXPPPPPPPPPPPPPXXXXXXXXXX	ALWSRLQS(1)EERER	8	4	3.4014	+		1268	1268	7361.1	9869.9	9997.7	5095.4	4054.8	4789.5
		REV__sp|Q9UQC9|CLCA2_HUMAN	REV__sp|Q9UQC9|CLCA2_HUMAN		1	0.00668952	26.907	1	S		X;X;X;X;X;X;X;X;X;X;X;X;X;X;X;Phospho (STY);X;X;X;X;X;X;X;X;X;X;X;X;X;X;X	XXXXXXXXXXXXXXPPPPPPPPPPPXXXXXX	VS(1)FGKRWEEER	2	3	-3.0821	+		20202	20202	10617	4468.4	3678.7	9827.4	3635.8	2923.3
		REV__sp|Q9Y4K3|TRAF6_HUMAN	REV__sp|Q9Y4K3|TRAF6_HUMAN		1	0.00198066	37.326	1	S		X;X;X;X;X;X;X;X;X;X;X;X;X;X;X;Phospho (STY);X;X;X;X;X;X;X;X;X;X;X;X;X;X;X	XXXXXXXXXXXPPPPPPPPPXXXXXXXXXXX	CVMLS(1)LIRK	5	3	1.856	+		2404;2405;2406	2406	39350	50216	24060	20130	24785	20041
		REV__sp|Q9Y618|NCOR2_HUMAN	REV__sp|Q9Y618|NCOR2_HUMAN		0.992021	0.00486166	19.62	1	S		X;X;X;X;X;X;X;X;X;X;X;X;X;X;X;Phospho (STY);X;X;X;X;X;X;X;X;X;X;X;X;X;X;X	XXXXXXXXXXXXPPPPPPPPPXXXXXXXXXX	LS(0.008)PS(0.992)DEGIR	4	2	0.06394	+		11103;11104;11105	11104	21198	37011	48506	15452	13945	14106
sp|A0FGR8|ESYT2_HUMAN	758	sp|A0FGR8|ESYT2_HUMAN	sp|A0FGR8|ESYT2_HUMAN	>sp|A0FGR8|ESYT2_HUMAN Extended synaptotagmin-2 OS=Homo sapiens OX=9606 GN=ESYT2 PE=1 SV=1	0.999597	4.04e-44	159.43	1;2	S	SPGHISVKEPTPSIASDISLPIATQELRQRL	X;X;X;X;X;X;X;X;X;X;X;X;X;X;X;Phospho (STY);X;X;Phospho (STY);X;X;X;X;X;X;X;X;X;X;X;X	XXXXXXXXPPPPPPPPPPPPPPPPPPPPXXX	EPTPSIAS(1)DIS(1)LPIATQELR	8	3	0.94057			4582;4584;4586;4587;4588;4589;4590;4591	4588	129220	223210	167760	103920	108630	91977
sp|A0FGR8|ESYT2_HUMAN	761	sp|A0FGR8|ESYT2_HUMAN	sp|A0FGR8|ESYT2_HUMAN	>sp|A0FGR8|ESYT2_HUMAN Extended synaptotagmin-2 OS=Homo sapiens OX=9606 GN=ESYT2 PE=1 SV=1	0.999997	4.04e-44	159.43	1;2	S	HISVKEPTPSIASDISLPIATQELRQRLRQL	X;X;X;X;X;X;X;X;X;X;X;X;Phospho (STY);X;X;Phospho (STY);X;X;X;X;X;X;X;X;X;X;X;X;X;X;X	XXXXXPPPPPPPPPPPPPPPPPPPPXXXXXX	EPTPSIASDIS(1)LPIATQELR	11	3	-2.0859			4581;4583;4585;4587;4588;4589;4590;4591	4581	128670	229210	169880	104390	109750	91706
sp|A0FGR8|ESYT2_HUMAN	736	sp|A0FGR8|ESYT2_HUMAN	sp|A0FGR8|ESYT2_HUMAN	>sp|A0FGR8|ESYT2_HUMAN Extended synaptotagmin-2 OS=Homo sapiens OX=9606 GN=ESYT2 PE=1 SV=1	0.507769	7.72e-07	78.598	2	S	QPPEAGPQGLHDLGRSSSSLLASPGHISVKE	X;X;X;X;X;X;X;X;X;X;X;X;X;X;X;Phospho (STY);X;Phospho (STY);Phospho (STY);X;X;X;X;X;X;X;X;X;X;X;X	XXXXXXXXXXXXXXXPPPPPPPPPPPPPPPX	S(0.508)S(0.508)S(0.538)S(0.447)LLASPGHISVK	1	3	-1.1294			17471	17471	21262	34528	24388	17853	20701	19473
sp|A0FGR8|ESYT2_HUMAN	737	sp|A0FGR8|ESYT2_HUMAN	sp|A0FGR8|ESYT2_HUMAN	>sp|A0FGR8|ESYT2_HUMAN Extended synaptotagmin-2 OS=Homo sapiens OX=9606 GN=ESYT2 PE=1 SV=1	0.507769	7.72e-07	78.598	2	S	PPEAGPQGLHDLGRSSSSLLASPGHISVKEP	X;X;X;X;X;X;X;X;X;X;X;X;X;X;X;X;X;X;X;X;X;X;X;X;X;X;X;X;X;X;X	XXXXXXXXXXXXXXXXXXXXXXXXXXXXXXX	S(0.508)S(0.508)S(0.538)S(0.447)LLASPGHISVK	2	3	-1.1294			17471	17471	21262	34528	24388	17853	20701	19473
sp|A0FGR8|ESYT2_HUMAN	738	sp|A0FGR8|ESYT2_HUMAN	sp|A0FGR8|ESYT2_HUMAN	>sp|A0FGR8|ESYT2_HUMAN Extended synaptotagmin-2 OS=Homo sapiens OX=9606 GN=ESYT2 PE=1 SV=1	0.537664	7.72e-07	78.598	2	S	PEAGPQGLHDLGRSSSSLLASPGHISVKEPT	X;X;X;X;X;X;X;X;X;X;X;X;X;Phospho (STY);X;Phospho (STY);X;X;X;X;X;X;X;X;X;X;X;X;X;X;X	XXXXXXXXXXXXXPPPPPPPPPPPPPPPXXX	S(0.508)S(0.508)S(0.538)S(0.447)LLASPGHISVK	3	3	-1.1294			17471	17471	21262	34528	24388	17853	20701	19473
sp|A0FGR8|ESYT2_HUMAN	739	sp|A0FGR8|ESYT2_HUMAN	sp|A0FGR8|ESYT2_HUMAN	>sp|A0FGR8|ESYT2_HUMAN Extended synaptotagmin-2 OS=Homo sapiens OX=9606 GN=ESYT2 PE=1 SV=1	0.737942	3.68e-05	63.776	2	S	EAGPQGLHDLGRSSSSLLASPGHISVKEPTP	X;X;X;X;X;X;X;X;X;X;X;X;Phospho (STY);X;X;Phospho (STY);X;X;X;X;X;X;X;X;X;X;X;X;X;X;X	XXXXXXXXXXXXPPPPPPPPPPPPPPPXXXX	S(0.429)S(0.429)S(0.375)S(0.738)LLAS(0.029)PGHISVK	4	3	0.16166			17470	17470	11059	22766	17752	8805	9201	7164.7
sp|A0JNW5|UH1BL_HUMAN	989	sp|A0JNW5|UH1BL_HUMAN	sp|A0JNW5|UH1BL_HUMAN	>sp|A0JNW5|UH1BL_HUMAN UHRF1-binding protein 1-like OS=Homo sapiens OX=9606 GN=UHRF1BP1L PE=1 SV=2	0.967936	0.000530482	35.481	1	S	KISEDESSGLVYKSGSGEIGSETSDKKDSFY	X;X;X;X;X;X;X;X;X;X;X;X;X;X;X;Phospho (STY);X;X;X;X;X;X;X;X;X;X;X;X;X;X;X	XXXXXXXXXXXXXPPPPPPPPPPPPPPXXXX	S(0.014)GS(0.968)GEIGS(0.011)ET(0.003)S(0.004)DKK	3	3	0.2258			15468;15469;15470	15469	76611	99546	73010	54933	45300	38017
sp|A0MZ66|SHOT1_HUMAN	493	sp|A0MZ66|SHOT1_HUMAN	sp|A0MZ66|SHOT1_HUMAN	>sp|A0MZ66|SHOT1_HUMAN Shootin-1 OS=Homo sapiens OX=9606 GN=SHTN1 PE=1 SV=4	0.398083	7.32e-11	78.723		S	ERILRRRKVTAEADSSSPTGILATSESKSMP	X;X;X;X;X;X;X;X;X;X;X;X;X;X;X;Phospho (STY);X;X;X;X;X;X;X;X;X;X;X;X;X;X;X	XXXXXXXPPPPPPPPPPPPPPPPPPPPPXXX	KVTAEADS(0.071)S(0.398)S(0.398)PT(0.132)GILATSESK	9	4	0.4551				9983	0	0	0	0	0	0
sp|A0MZ66|SHOT1_HUMAN	494	sp|A0MZ66|SHOT1_HUMAN	sp|A0MZ66|SHOT1_HUMAN	>sp|A0MZ66|SHOT1_HUMAN Shootin-1 OS=Homo sapiens OX=9606 GN=SHTN1 PE=1 SV=4	0.784529	2.67e-17	101.5	1	S	RILRRRKVTAEADSSSPTGILATSESKSMPV	X;X;X;X;X;X;X;X;X;X;X;X;X;X;X;Phospho (STY);X;X;X;X;X;X;X;X;X;X;X;X;X;X;X	XXXXXXPPPPPPPPPPPPPPPPPPPPPXXXX	VTAEADS(0.022)S(0.129)S(0.785)PT(0.064)GILATSESK	9	3	1.1931			9979;9980;9982;20284	20284	41506	84770	68501	32704	35380	33770
sp|A1A4S6|RHG10_HUMAN	349	sp|A1A4S6|RHG10_HUMAN	sp|A1A4S6|RHG10_HUMAN	>sp|A1A4S6|RHG10_HUMAN Rho GTPase-activating protein 10 OS=Homo sapiens OX=9606 GN=ARHGAP10 PE=1 SV=1	0.495666	0.00194992	24.258		S	RRFCFDIEAADRPGVSLTMQAFSEEERKQWL	X;X;X;X;X;X;X;X;X;X;X;X;X;X;X;Phospho (STY);X;X;Oxidation (M);X;X;X;X;X;X;X;X;X;X;X;X	XXXXXXXXXXXXPPPPPPPPPPPPPPPXXXX	PGVS(0.496)LT(0.496)MQAFS(0.009)EEER	4	3	0.49527				12088	0	0	0	0	0	0
sp|A1A4S6|RHG10_HUMAN	356	sp|A1A4S6|RHG10_HUMAN	sp|A1A4S6|RHG10_HUMAN	>sp|A1A4S6|RHG10_HUMAN Rho GTPase-activating protein 10 OS=Homo sapiens OX=9606 GN=ARHGAP10 PE=1 SV=1	0.763877	0.000188147	32.054	1	S	EAADRPGVSLTMQAFSEEERKQWLEALGGKE	X;X;X;X;X;X;X;X;X;X;X;Oxidation (M);X;X;X;Phospho (STY);X;X;X;X;X;X;X;X;X;X;X;X;X;X;X	XXXXXPPPPPPPPPPPPPPPXXXXXXXXXXX	PGVS(0.118)LT(0.118)MQAFS(0.764)EEER	11	3	0.1697			12086;12087	12087	18961	12457	10126	17855	9215.4	7059.4
sp|A1L170|CA226_HUMAN	222	sp|A1L170|CA226_HUMAN	sp|A1L170|CA226_HUMAN	>sp|A1L170|CA226_HUMAN Uncharacterized protein C1orf226 OS=Homo sapiens OX=9606 GN=C1orf226 PE=1 SV=1	0.990026	0.00130276	50.658	2	S	SQDESKLKMTECRRASSPSLIERNGFKLSLS	X;X;X;X;X;X;X;X;X;X;X;X;X;X;X;Phospho (STY);Phospho (STY);X;X;X;X;X;X;X;X;X;X;X;X;X;X	XXXXXXXXXXXXXPPPPPPPPPPXXXXXXXX	RAS(0.99)S(0.819)PS(0.191)LIER	3	3	-0.22269			13086;13087;13088	13087	30087	46237	48123	23639	20263	19847
sp|A1L170|CA226_HUMAN	223	sp|A1L170|CA226_HUMAN	sp|A1L170|CA226_HUMAN	>sp|A1L170|CA226_HUMAN Uncharacterized protein C1orf226 OS=Homo sapiens OX=9606 GN=C1orf226 PE=1 SV=1	0.874562	0.00130276	50.658	2	S	QDESKLKMTECRRASSPSLIERNGFKLSLSP	X;X;X;X;X;X;X;X;X;X;X;X;X;X;Phospho (STY);Phospho (STY);X;X;X;X;X;X;X;X;X;X;X;X;X;X;X	XXXXXXXXXXXXPPPPPPPPPPXXXXXXXXX	RAS(0.971)S(0.875)PS(0.154)LIER	4	3	-0.17285			13086;13087;13088	13088	30087	46237	48123	23639	20263	19847
sp|A1L170|CA226_HUMAN	257	sp|A1L170|CA226_HUMAN	sp|A1L170|CA226_HUMAN	>sp|A1L170|CA226_HUMAN Uncharacterized protein C1orf226 OS=Homo sapiens OX=9606 GN=C1orf226 PE=1 SV=1	0.358032	2.75e-08	90.152		S	AESWEDGSPPPQARTSSLDNEGPHPDLLSFE	X;X;X;X;X;X;X;X;X;X;X;X;X;X;X;X;X;X;X;X;X;X;X;X;X;X;X;X;X;X;X	XXXXXXXXXXXXXXXXXXXXXXXXXXXXXXX	T(0.358)S(0.358)S(0.284)LDNEGPHPDLLSFE	2	3	-0.30738				19048	0	0	0	0	0	0
sp|A2AJT9|BCLA3_HUMAN	192	sp|A2AJT9|BCLA3_HUMAN	sp|A2AJT9|BCLA3_HUMAN	>sp|A2AJT9|BCLA3_HUMAN BCLAF1 and THRAP3 family member 3 OS=Homo sapiens OX=9606 GN=BCLAF3 PE=1 SV=1	0.999922	0.00119952	55.228	1	S	QRIQEEKYSQSTRRGSEDFETRSSFQKRYPE	X;X;X;X;X;X;X;X;X;X;X;X;X;X;X;Phospho (STY);X;X;X;X;X;X;X;X;X;X;X;X;X;X;X	XXXXXXXXXXXXXPPPPPPPPPXXXXXXXXX	RGS(1)EDFETR	3	3	0.741			13440	13440	5960.9	10772	6095	3606.2	4103.5	2867.4
sp|A2RRP1|NBAS_HUMAN	473	sp|A2RRP1|NBAS_HUMAN	sp|A2RRP1|NBAS_HUMAN	>sp|A2RRP1|NBAS_HUMAN Neuroblastoma-amplified sequence OS=Homo sapiens OX=9606 GN=NBAS PE=1 SV=2	0.999205	8.32e-38	146.61	1	S	RLETRAGEEDEGEEDSDSDYEISAKARYFGY	X;X;X;X;X;X;X;X;X;X;X;X;X;X;X;Phospho (STY);X;X;X;X;X;X;X;X;X;X;X;X;X;X;X	XXXXXPPPPPPPPPPPPPPPPPPPPXXXXXX	AGEEDEGEEDS(0.999)DS(0.001)DYEISAK	11	3	0.44135			826;827	826	27194	47366	43822	21226	19465	18505
sp|A2RRP1|NBAS_HUMAN	475	sp|A2RRP1|NBAS_HUMAN	sp|A2RRP1|NBAS_HUMAN	>sp|A2RRP1|NBAS_HUMAN Neuroblastoma-amplified sequence OS=Homo sapiens OX=9606 GN=NBAS PE=1 SV=2	0.466986	3.72e-05	51.422		S	ETRAGEEDEGEEDSDSDYEISAKARYFGYIK	X;X;X;X;X;X;X;X;X;X;X;X;X;X;X;Phospho (STY);X;X;X;X;X;X;X;X;X;X;X;X;X;X;X	XXXPPPPPPPPPPPPPPPPPPPPXXXXXXXX	AGEEDEGEEDS(0.39)DS(0.467)DY(0.141)EIS(0.003)AK	13	3	-0.89074				828	0	0	0	0	0	0
sp|A2RRP1|NBAS_HUMAN	1937	sp|A2RRP1|NBAS_HUMAN	sp|A2RRP1|NBAS_HUMAN	>sp|A2RRP1|NBAS_HUMAN Neuroblastoma-amplified sequence OS=Homo sapiens OX=9606 GN=NBAS PE=1 SV=2	1	0.000188036	51.251	1	S	IKTVKHFIEKPRKRNSEDEAQEAKDSKVTYA	X;X;X;X;X;X;X;X;X;X;X;X;X;X;X;Phospho (STY);X;X;X;X;X;X;X;X;X;X;X;X;X;X;X	XXXXXXXXXXXXPPPPPPPPPPPPXXXXXXX	KRNS(1)EDEAQEAK	4	3	0.52055			9661	9661	6301.7	12735	10081	4963.1	5464.1	4706.9
sp|A4D1E1|Z804B_HUMAN	877	sp|A4D1E1|Z804B_HUMAN	sp|A4D1E1|Z804B_HUMAN	>sp|A4D1E1|Z804B_HUMAN Zinc finger protein 804B OS=Homo sapiens OX=9606 GN=ZNF804B PE=2 SV=2	0.98776	0.00511893	17.929	1	S	MYYLNKSKRNQESLGSPHICDLGKVRPMKCN	X;X;X;X;X;X;X;X;X;X;X;X;X;X;X;Phospho (STY);X;X;X;X;X;X;X;X;X;X;X;X;X;X;X	XXXXXXXXXPPPPPPPPPPPPPPPXXXXXXX	NQES(0.012)LGS(0.988)PHICDLGK	7	2	3.8615			11887;11888	11888	58797	41517	83997	36381	17983	36371
sp|A4D1S0|KLRG2_HUMAN	215	sp|A4D1S0|KLRG2_HUMAN	sp|A4D1S0|KLRG2_HUMAN	>sp|A4D1S0|KLRG2_HUMAN Killer cell lectin-like receptor subfamily G member 2 OS=Homo sapiens OX=9606 GN=KLRG2 PE=1 SV=3	0.591596	0.00245799	35.453	1	S	EGRASPAEGSAGSPGSPTCCRCKELGLEKED	X;X;X;X;X;X;X;X;X;X;X;X;X;X;X;Phospho (STY);X;X;X;X;X;X;X;X;X;X;X;X;X;X;X	XXXPPPPPPPPPPPPPPPPPPXXXXXXXXXX	ASPAEGS(0.002)AGS(0.084)PGS(0.592)PT(0.322)CCR	13	3	0.081494			1843	1843	9441.4	14967	10803	6857.9	5372	5471.4
sp|A5D8V7|CC151_HUMAN	562	sp|A5D8V7|CC151_HUMAN	sp|A5D8V7|CC151_HUMAN	>sp|A5D8V7|CC151_HUMAN Coiled-coil domain-containing protein 151 OS=Homo sapiens OX=9606 GN=CCDC151 PE=1 SV=1	1	1.28e-07	81.024	1	S	ALPLATSKDKFFDEESEEEDNEVVTRASLKI	X;X;X;X;X;X;X;X;X;X;X;X;X;X;X;Phospho (STY);X;X;X;X;X;X;X;X;X;X;X;X;X;X;X	XXXXXXXXPPPPPPPPPPPPPPPPPPXXXXX	DKFFDEES(1)EEEDNEVVTR	8	3	1.4792			2755;2756	2755	30295	34760	31429	30887	13787	14665
sp|A6NDB9|PALM3_HUMAN	155	sp|A6NDB9|PALM3_HUMAN	sp|A6NDB9|PALM3_HUMAN	>sp|A6NDB9|PALM3_HUMAN Paralemmin-3 OS=Homo sapiens OX=9606 GN=PALM3 PE=1 SV=2	0.949206	8.41e-21	93.148	2	S	KRASLPAGLVGTPPESPSEPREDVLGFLPGP	X;X;X;X;X;X;X;X;X;X;X;Phospho (STY);X;X;X;Phospho (STY);X;X;X;X;X;X;X;X;X;X;X;X;X;X;X	XXPPPPPPPPPPPPPPPPPPPPPPPPPPPPP	ASLPAGLVGT(1)PPES(0.949)PS(0.051)EPREDVLGFLPGPR	14	4	-0.18218			1829;1830;1831;1832;1833;1834	1834	28194	45045	30919	24016	22792	19007
sp|A6NDB9|PALM3_HUMAN	375	sp|A6NDB9|PALM3_HUMAN	sp|A6NDB9|PALM3_HUMAN	>sp|A6NDB9|PALM3_HUMAN Paralemmin-3 OS=Homo sapiens OX=9606 GN=PALM3 PE=1 SV=2	1	4.1e-09	88.067	1	S	GLEGPEVAGRERGDESPLGAEGAKTGGGEET	X;X;X;X;X;X;X;X;X;X;X;X;X;X;X;Phospho (STY);X;X;X;X;X;X;X;X;X;X;X;X;X;X;X	XXXXXXXXXXPPPPPPPPPPPPPPXXXXXXX	ERGDES(1)PLGAEGAK	6	3	0.29703			4680;4681;4682	4682	46642	91607	41997	36873	31220	20472
sp|A6NDB9|PALM3_HUMAN	439	sp|A6NDB9|PALM3_HUMAN	sp|A6NDB9|PALM3_HUMAN	>sp|A6NDB9|PALM3_HUMAN Paralemmin-3 OS=Homo sapiens OX=9606 GN=PALM3 PE=1 SV=2	0.999756	0.000279492	51.813	1	S	ERKGGEKKLELESRGSAEKLGTEREGGEEPL	X;X;X;X;X;X;X;X;X;X;X;X;X;X;X;Phospho (STY);X;X;X;X;X;X;X;X;X;X;X;X;X;X;X	XXXXXXXPPPPPPPPPPPPXXXXXXXXXXXX	KLELESRGS(1)AEK	9	4	-0.077948			9221	9221	14079	30785	10700	13756	11222	7907.4
sp|A6NDB9|PALM3_HUMAN	302	sp|A6NDB9|PALM3_HUMAN	sp|A6NDB9|PALM3_HUMAN	>sp|A6NDB9|PALM3_HUMAN Paralemmin-3 OS=Homo sapiens OX=9606 GN=PALM3 PE=1 SV=2	0.60217	0.00075325	46.901	1	S	EAMGEIGRVPEVVQTSSPRLQERLEAAASIE	X;X;X;X;X;X;X;X;X;X;X;X;X;X;X;Phospho (STY);X;X;X;X;X;X;X;X;X;X;X;X;X;X;X	XXXXXXXXPPPPPPPPPPPXXXXXXXXXXXX	VPEVVQT(0.044)S(0.602)S(0.354)PR	8	3	-0.34659			20026;20028	20026	5551.8	9200.6	6550.9	4666.4	4040.7	3867.4
sp|A6NDB9|PALM3_HUMAN	303	sp|A6NDB9|PALM3_HUMAN	sp|A6NDB9|PALM3_HUMAN	>sp|A6NDB9|PALM3_HUMAN Paralemmin-3 OS=Homo sapiens OX=9606 GN=PALM3 PE=1 SV=2	0.957962	9.84e-05	78.108	1	S	AMGEIGRVPEVVQTSSPRLQERLEAAASIEG	X;X;X;X;X;X;X;X;X;X;X;X;X;X;X;Phospho (STY);X;X;X;X;X;X;X;X;X;X;X;X;X;X;X	XXXXXXXPPPPPPPPPPPXXXXXXXXXXXXX	VPEVVQTS(0.042)S(0.958)PR	9	2	0.33403			20027	20027	18230	34519	21599	14604	13126	10373
sp|A6NFI3|ZN316_HUMAN	112	sp|A6NFI3|ZN316_HUMAN	sp|A6NFI3|ZN316_HUMAN	>sp|A6NFI3|ZN316_HUMAN Zinc finger protein 316 OS=Homo sapiens OX=9606 GN=ZNF316 PE=1 SV=1	1	0.00093851	43.466	1	S	ALGTQERLSRGGDAKSPVLQEKGLQASRAPA	X;X;X;X;X;X;X;X;X;X;X;X;X;X;X;Phospho (STY);X;X;X;X;X;X;X;X;X;X;X;X;X;X;X	XXXXXXXXXXPPPPPPPPPPPPXXXXXXXXX	GGDAKS(1)PVLQEK	6	3	0.47577			6000;6001;6002	6002	71689	117480	113210	57504	51495	45298
sp|A7E2V4|ZSWM8_HUMAN	48	sp|A7E2V4|ZSWM8_HUMAN	sp|A7E2V4|ZSWM8_HUMAN	>sp|A7E2V4|ZSWM8_HUMAN Zinc finger SWIM domain-containing protein 8 OS=Homo sapiens OX=9606 GN=ZSWIM8 PE=1 SV=1	0.999724	0.000399124	42.263	2	S	EAESLCQNWRGWRKQSAGPNSPTGGGGGGGS	X;X;X;X;X;X;X;X;X;X;X;X;X;X;X;Phospho (STY);X;X;X;X;Phospho (STY);X;X;X;X;X;X;X;X;X;X	XXXXXXXXXXXXXPPPPPPPPPPPPPPPPPP	KQS(1)AGPNS(0.939)PT(0.058)GGGGGGGS(0.002)GGT(0.002)R	3	3	0.61313			9561	9561	4012	6966.8	6963	2986.2	2816	3460.6
sp|A7E2V4|ZSWM8_HUMAN	53	sp|A7E2V4|ZSWM8_HUMAN	sp|A7E2V4|ZSWM8_HUMAN	>sp|A7E2V4|ZSWM8_HUMAN Zinc finger SWIM domain-containing protein 8 OS=Homo sapiens OX=9606 GN=ZSWIM8 PE=1 SV=1	0.938606	0.000399124	42.263	2	S	CQNWRGWRKQSAGPNSPTGGGGGGGSGGTRM	X;X;X;X;X;X;X;X;X;X;Phospho (STY);X;X;X;X;Phospho (STY);X;X;X;X;X;X;X;X;X;X;X;X;X;X;X	XXXXXXXXPPPPPPPPPPPPPPPPPPPPPPX	KQS(1)AGPNS(0.939)PT(0.058)GGGGGGGS(0.002)GGT(0.002)R	8	3	0.61313			9561	9561	4012	6966.8	6963	2986.2	2816	3460.6
sp|A7E2V4|ZSWM8_HUMAN	567	sp|A7E2V4|ZSWM8_HUMAN	sp|A7E2V4|ZSWM8_HUMAN	>sp|A7E2V4|ZSWM8_HUMAN Zinc finger SWIM domain-containing protein 8 OS=Homo sapiens OX=9606 GN=ZSWIM8 PE=1 SV=1	1	0.000785458	24.636	1	S	LGEGVPSSQRGPRRLSAEGGDKALHKMGPGG	X;X;X;X;X;X;X;X;X;X;X;X;X;X;X;Phospho (STY);X;X;X;X;X;X;X;X;X;X;X;X;X;X;X	XXXXXXXXXXXXXPPPPPPPPPXXXXXXXXX	RLS(1)AEGGDK	3	3	0.23522			13776;13777	13777	22734	38029	27754	16205	17445	15895
sp|B2RUZ4|SMIM1_HUMAN	22	sp|B2RUZ4|SMIM1_HUMAN	sp|B2RUZ4|SMIM1_HUMAN	>sp|B2RUZ4|SMIM1_HUMAN Small integral membrane protein 1 OS=Homo sapiens OX=9606 GN=SMIM1 PE=1 SV=1	0.999999	3.37e-09	89.787	2	S	HVHYSRWEDGSRDGVSLGAVSSTEEASRCRR	X;X;X;X;X;X;X;X;X;X;X;X;X;X;X;Phospho (STY);X;X;X;X;Phospho (STY);X;X;X;X;X;X;X;X;X;X	XXXXXXXXXXXXPPPPPPPPPPPPPPPPXXX	DGVS(1)LGAVS(0.972)S(0.021)T(0.007)EEASR	4	2	-0.059863			2660	2660	4009.1	4886.1	4552.4	3616.9	3108.5	2442.5
sp|B2RUZ4|SMIM1_HUMAN	27	sp|B2RUZ4|SMIM1_HUMAN	sp|B2RUZ4|SMIM1_HUMAN	>sp|B2RUZ4|SMIM1_HUMAN Small integral membrane protein 1 OS=Homo sapiens OX=9606 GN=SMIM1 PE=1 SV=1	0.971853	3.37e-09	89.787	2	S	RWEDGSRDGVSLGAVSSTEEASRCRRISQRL	X;X;X;X;X;X;X;X;X;X;Phospho (STY);X;X;X;X;Phospho (STY);X;X;X;X;X;X;X;X;X;X;X;X;X;X;X	XXXXXXXPPPPPPPPPPPPPPPPXXXXXXXX	DGVS(1)LGAVS(0.972)S(0.021)T(0.007)EEASR	9	2	-0.059863			2660	2660	4009.1	4886.1	4552.4	3616.9	3108.5	2442.5
sp|Q13765|NACA_HUMAN;sp|E9PAV3|NACAM_HUMAN	166;2029	sp|Q13765|NACA_HUMAN	sp|Q13765|NACA_HUMAN	>sp|Q13765|NACA_HUMAN Nascent polypeptide-associated complex subunit alpha OS=Homo sapiens OX=9606 GN=NACA PE=1 SV=1;>sp|E9PAV3|NACAM_HUMAN Nascent polypeptide-associated complex subunit alpha, muscle-specific form OS=Homo sapiens OX=9606 GN=NACA PE=1 SV=1	0.804397	4.22e-49	148.14	1;2	S	SNIQENTQTPTVQEESEEEEVDETGVEVKDI	X;X;X;X;X;X;X;X;X;X;X;X;X;X;X;Phospho (STY);X;X;X;X;X;X;X;X;X;X;X;X;X;X;X	PPPPPPPPPPPPPPPPPPPPPPPPPPPPPXX	VQGEAVSNIQENTQT(0.008)PT(0.188)VQEES(0.804)EEEEVDETGVEVK	22	3	0.060987			20090;20096;20102;20104	20090	20710	30244	27749	15774	15561	13843
sp|O00159|MYO1C_HUMAN	1041	sp|O00159|MYO1C_HUMAN	sp|O00159|MYO1C_HUMAN	>sp|O00159|MYO1C_HUMAN Unconventional myosin-Ic OS=Homo sapiens OX=9606 GN=MYO1C PE=1 SV=4	0.937113	4.85e-05	42.626	1	S	AGGPGRDGTIDFTPGSELLITKAKNGHLAVV	X;X;X;X;X;X;X;X;X;X;X;X;X;X;X;Phospho (STY);X;X;X;X;X;X;X;X;X;X;X;X;X;X;X	XXXXXXPPPPPPPPPPPPPPPPXXXXXXXXX	DGTIDFT(0.062)PGS(0.937)ELLIT(0.001)K	10	3	-0.71652			2659	2659	7587.1	4965.9	3715.4	4429.7	4467.8	3063.5
sp|O00159|MYO1C_HUMAN	408	sp|O00159|MYO1C_HUMAN	sp|O00159|MYO1C_HUMAN	>sp|O00159|MYO1C_HUMAN Unconventional myosin-Ic OS=Homo sapiens OX=9606 GN=MYO1C PE=1 SV=4	0.941339	0.000865044	110.04	1	S	LVGKINRSLASKDVESPSWRSTTVLGLLDIY	X;X;X;X;X;X;X;X;X;X;X;X;X;X;X;Phospho (STY);X;X;X;X;X;X;X;X;X;X;X;X;X;X;X	XXXXXXXXXXXXPPPPPPPPXXXXXXXXXXX	DVES(0.941)PS(0.059)WR	4	2	0.27883			3271;3272;3273	3271	61740	75423	79733	54912	52917	43622
sp|O00159|MYO1C_HUMAN	736	sp|O00159|MYO1C_HUMAN	sp|O00159|MYO1C_HUMAN	>sp|O00159|MYO1C_HUMAN Unconventional myosin-Ic OS=Homo sapiens OX=9606 GN=MYO1C PE=1 SV=4	0.999992	0.00198071	51.828	1	S	KTLFATEDALEVRRQSLATKIQAAWRGFHWR	X;X;X;X;X;X;X;X;X;X;X;X;X;X;X;Phospho (STY);X;X;X;X;X;X;X;X;X;X;X;X;X;X;X	XXXXXXXXXXXXXPPPPPPPXXXXXXXXXXX	RQS(1)LATK	3	3	0.08817			14100;14101;14102;14103;14104;14105	14104	108450	73180	73512	82207	60379	54703
sp|O00159|MYO1C_HUMAN	864	sp|O00159|MYO1C_HUMAN	sp|O00159|MYO1C_HUMAN	>sp|O00159|MYO1C_HUMAN Unconventional myosin-Ic OS=Homo sapiens OX=9606 GN=MYO1C PE=1 SV=4	0.995953	0.0152118	38.334	1	S	ELCIKNMVWKYCRSISPEWKQQLQQKAVASE	X;X;X;X;X;X;X;X;X;X;X;X;X;X;X;Phospho (STY);X;X;X;X;X;X;X;X;X;X;X;X;X;X;X	XXXXXXXXXXXXXPPPPPPPXXXXXXXXXXX	S(0.004)IS(0.996)PEWK	3	2	-0.91981			15725;15726	15726	54669	50396	48158	46293	35888	30925
sp|O00161|SNP23_HUMAN	161	sp|O00161|SNP23_HUMAN	sp|O00161|SNP23_HUMAN	>sp|O00161|SNP23_HUMAN Synaptosomal-associated protein 23 OS=Homo sapiens OX=9606 GN=SNAP23 PE=1 SV=1	0.999013	1.44e-06	56.562	1	S	DAREDEMEENLTQVGSILGNLKDMALNIGNE	X;X;X;X;X;X;X;X;X;X;X;X;X;X;X;Phospho (STY);X;X;X;X;X;X;X;X;X;X;X;X;X;X;X	PPPPPPPPPPPPPPPPPPPPPPXXXXXXXXX	ITNDAREDEMEENLT(0.001)QVGS(0.999)ILGNLK	19	4	-1.3237			8200	8200	2606.5	5026.5	3029.7	2415.5	2485.4	1622.3
sp|O00178|GTPB1_HUMAN	25	sp|O00178|GTPB1_HUMAN	sp|O00178|GTPB1_HUMAN	>sp|O00178|GTPB1_HUMAN GTP-binding protein 1 OS=Homo sapiens OX=9606 GN=GTPBP1 PE=1 SV=3	0.934057	1.1e-21	109.31	1	S	MDSPVPASMFAPEPSSPGAARAAAAAARLHG	X;X;X;X;X;X;X;X;X;X;X;X;X;X;X;Phospho (STY);X;X;X;X;X;X;X;X;X;X;X;X;X;X;X	PPPPPPPPPPPPPPPPPPPPPXXXXXXXXXX	SAMDSPVPASMFAPEPS(0.066)S(0.934)PGAAR	18	3	-0.149			14774;14775	14774	12301	19529	15063	11364	10933	8962.6
sp|O00192|ARVC_HUMAN	267	sp|O00192|ARVC_HUMAN	sp|O00192|ARVC_HUMAN	>sp|O00192|ARVC_HUMAN Armadillo repeat protein deleted in velo-cardio-facial syndrome OS=Homo sapiens OX=9606 GN=ARVCF PE=1 SV=1	0.813018	2.94e-23	100.16	1	S	ERFQAEPYGLEDDTRSLAADDEGGPELEPDY	X;X;X;X;X;X;X;X;X;X;X;X;X;X;X;Phospho (STY);X;X;X;X;X;X;X;X;X;X;X;X;X;X;X	XXPPPPPPPPPPPPPPPPPPPPPPPPPPPPP	FQAEPYGLEDDT(0.187)RS(0.813)LAADDEGGPELEPDYGTATR	14	4	1.4623			5495	5495	5177	6978	4921.3	4289.7	3622.9	3606.1
sp|O00192|ARVC_HUMAN	335	sp|O00192|ARVC_HUMAN	sp|O00192|ARVC_HUMAN	>sp|O00192|ARVC_HUMAN Armadillo repeat protein deleted in velo-cardio-facial syndrome OS=Homo sapiens OX=9606 GN=ARVCF PE=1 SV=1	0.990389	0.0117703	22.115	1	S	MVTAPLAQPERGSMGSLDRLVRRSPSVDSAR	X;X;X;X;X;X;X;X;X;X;X;X;X;X;X;Phospho (STY);X;X;X;X;X;X;X;X;X;Phospho (STY);X;X;Phospho (STY);X;X	XXXXXXXXXXXPPPPPPPPXXXXXXXXXXXX	GS(0.01)MGS(0.99)LDR	5	2	-0.065083			7029;7030;7031	7029	53912	63182	46887	43743	35163	28813
sp|O00192|ARVC_HUMAN	345	sp|O00192|ARVC_HUMAN	sp|O00192|ARVC_HUMAN	>sp|O00192|ARVC_HUMAN Armadillo repeat protein deleted in velo-cardio-facial syndrome OS=Homo sapiens OX=9606 GN=ARVCF PE=1 SV=1	0.922585	0.000866802	60.647	2	S	RGSMGSLDRLVRRSPSVDSARKEPRWRDPEL	X;X;X;X;X;Phospho (STY);X;X;X;X;X;X;X;X;X;Phospho (STY);X;X;Phospho (STY);X;X;X;X;X;X;X;X;X;X;X;X	XXXXXXXXXXXXPPPPPPPPPXXXXXXXXXX	RS(0.084)PS(0.923)VDS(0.993)AR	4	2	1.0447			14357;14358	14357	8125.7	13741	8674.1	6179.4	4801.8	4207.8
sp|O00192|ARVC_HUMAN	348	sp|O00192|ARVC_HUMAN	sp|O00192|ARVC_HUMAN	>sp|O00192|ARVC_HUMAN Armadillo repeat protein deleted in velo-cardio-facial syndrome OS=Homo sapiens OX=9606 GN=ARVCF PE=1 SV=1	0.993301	0.000866802	60.647	2	S	MGSLDRLVRRSPSVDSARKEPRWRDPELPEV	X;X;Phospho (STY);X;X;X;X;X;X;X;X;X;Phospho (STY);X;X;Phospho (STY);X;X;X;X;X;X;X;X;X;X;X;X;X;X;X	XXXXXXXXXPPPPPPPPPXXXXXXXXXXXXX	RS(0.084)PS(0.923)VDS(0.993)AR	7	2	1.0447			14357;14358	14357	8125.7	13741	8674.1	6179.4	4801.8	4207.8
sp|O00193|SMAP_HUMAN	15	sp|O00193|SMAP_HUMAN	sp|O00193|SMAP_HUMAN	>sp|O00193|SMAP_HUMAN Small acidic protein OS=Homo sapiens OX=9606 GN=SMAP PE=1 SV=1	0.591244	1.56e-17	98.861	1	S	_MSAARESHPHGVKRSASPDDDLGSSNWEAA	X;X;X;X;X;X;X;X;X;X;X;X;X;X;X;Phospho (STY);X;X;X;X;X;X;X;X;X;X;X;X;X;X;X	XXXXXXXXXXXXXXPPPPPPPPPPPPPPPPP	RS(0.591)AS(0.409)PDDDLGSSNWEAADLGNEER	2	3	2.3446			14264;14266	14266	17669	32922	24669	18125	15747	13971
sp|O00193|SMAP_HUMAN	17	sp|O00193|SMAP_HUMAN	sp|O00193|SMAP_HUMAN	>sp|O00193|SMAP_HUMAN Small acidic protein OS=Homo sapiens OX=9606 GN=SMAP PE=1 SV=1	0.988395	2.31e-136	269.94	1	S	SAARESHPHGVKRSASPDDDLGSSNWEAADL	X;X;X;X;X;X;X;X;X;X;X;X;X;X;X;Phospho (STY);X;X;X;X;X;X;X;X;X;X;X;X;X;X;X	XXXXXXXXXXXXPPPPPPPPPPPPPPPPPPP	S(0.012)AS(0.988)PDDDLGSSNWEAADLGNEER	3	2	0.30296			14265;14825;14826;14827;14828;14829;14830;14831;14832;14833	14832	131060	224740	165460	102910	81670	84009
sp|O00203|AP3B1_HUMAN	750	sp|O00203|AP3B1_HUMAN	sp|O00203|AP3B1_HUMAN	>sp|O00203|AP3B1_HUMAN AP-3 complex subunit beta-1 OS=Homo sapiens OX=9606 GN=AP3B1 PE=1 SV=3	1	5.28e-09	79.694	2	S	ENKRTAKRNSKAKGKSDSEDGEKENEKSKTS	X;X;X;X;X;X;X;X;X;X;X;X;X;X;X;Phospho (STY);X;Phospho (STY);X;X;X;X;X;X;X;X;X;X;X;X;X	XXXXXXXXXXXXXPPPPPPPPPPPPPPXXXX	GKS(1)DS(1)EDGEKENEK	3	3	-0.13915			6233;6234;6235;6236;6237;6238	6238	121210	173470	171270	74691	65946	61287
sp|O00203|AP3B1_HUMAN	752	sp|O00203|AP3B1_HUMAN	sp|O00203|AP3B1_HUMAN	>sp|O00203|AP3B1_HUMAN AP-3 complex subunit beta-1 OS=Homo sapiens OX=9606 GN=AP3B1 PE=1 SV=3	1	5.28e-09	79.694	2	S	KRTAKRNSKAKGKSDSEDGEKENEKSKTSDS	X;X;X;X;X;X;X;X;X;X;X;X;X;Phospho (STY);X;Phospho (STY);X;X;X;X;X;X;X;X;X;X;X;X;X;X;X	XXXXXXXXXXXPPPPPPPPPPPPPPXXXXXX	GKS(1)DS(1)EDGEKENEK	5	3	-0.13915			6233;6234;6235;6236;6237;6238	6238	121210	173470	171270	74691	65946	61287
sp|O00203|AP3B1_HUMAN	276	sp|O00203|AP3B1_HUMAN	sp|O00203|AP3B1_HUMAN	>sp|O00203|AP3B1_HUMAN AP-3 complex subunit beta-1 OS=Homo sapiens OX=9606 GN=AP3B1 PE=1 SV=3	0.999999	1.74e-11	113.68	1	S	KEGDELEDNGKNFYESDDDQKEKTDKKKKPY	X;X;X;X;X;X;X;X;X;X;X;X;X;X;X;Phospho (STY);X;X;X;X;X;X;X;X;X;X;X;X;X;X;X	XXXXXXXXXXXPPPPPPPPPPPPXXXXXXXX	NFYES(1)DDDQKEK	5	3	0.30885			11753;11754;11755;11756	11753	130050	173020	127560	88056	74562	66345
sp|O00231|PSD11_HUMAN	14	sp|O00231|PSD11_HUMAN	sp|O00231|PSD11_HUMAN	>sp|O00231|PSD11_HUMAN 26S proteasome non-ATPase regulatory subunit 11 OS=Homo sapiens OX=9606 GN=PSMD11 PE=1 SV=3	0.723036	0.000211636	92.586	1	S	__MAAAAVVEFQRAQSLLSTDREASIDILHS	X;X;X;X;X;X;X;X;X;X;X;X;X;X;X;Phospho (STY);X;X;X;X;X;X;X;X;X;X;X;X;X;X;X	XXXXXXXXXXXXXPPPPPPPPPXXXXXXXXX	AQS(0.723)LLS(0.265)T(0.012)DR	3	2	0.86773			1585;1586	1586	36257	86633	67293	25870	27245	24145
sp|O00255|MEN1_HUMAN	548	sp|O00255|MEN1_HUMAN	sp|O00255|MEN1_HUMAN	>sp|O00255|MEN1_HUMAN Menin OS=Homo sapiens OX=9606 GN=MEN1 PE=1 SV=4	0.49997	2.93e-20	94.704	1	S	GPEGGSTAQVPAPTASPPPEGPVLTFQSEKM	X;X;X;X;X;X;X;X;X;X;X;X;X;X;X;X;X;X;X;X;X;X;X;X;X;X;X;X;X;X;X	XXXXXXXXXXXXXXXXXXXXXXXXXXXXXXX	GPEGGSTAQVPAPT(0.5)AS(0.5)PPPEGPVLTFQSEK	16	4	-0.93642			6624	6624	7967.6	11752	10926	5874.9	6166.2	6426.5
sp|O00264|PGRC1_HUMAN	181	sp|O00264|PGRC1_HUMAN	sp|O00264|PGRC1_HUMAN	>sp|O00264|PGRC1_HUMAN Membrane-associated progesterone receptor component 1 OS=Homo sapiens OX=9606 GN=PGRMC1 PE=1 SV=3	0.999999	2.09e-127	271.26	1	S	HVGKLLKEGEEPTVYSDEEEPKDESARKND_	X;X;X;X;X;X;X;X;X;X;X;X;X;X;X;Phospho (STY);X;X;X;X;X;X;X;X;X;X;X;X;X;X;X	XXXXPPPPPPPPPPPPPPPPPPPPPPPXXXX	EGEEPTVYS(1)DEEEPKDESAR	9	3	-0.89748			3898;3899;3900;3901;3902;3903;3904;3905;3906;3907;3908;3909;3910;3911;3912;3913;10700;10701;10702;10703;10704;10705;10706;10707;10708;10709;10710	3909	318940	861830	386210	272350	230950	212580
sp|O00264|PGRC1_HUMAN	57	sp|O00264|PGRC1_HUMAN	sp|O00264|PGRC1_HUMAN	>sp|O00264|PGRC1_HUMAN Membrane-associated progesterone receptor component 1 OS=Homo sapiens OX=9606 GN=PGRMC1 PE=1 SV=3	0.999993	1.1e-44	170.98	1	S	LYKIVRGDQPAASGDSDDDEPPPLPRLKRRD	X;X;X;X;X;X;X;X;X;X;X;X;X;X;X;Phospho (STY);X;X;X;X;X;X;X;X;X;X;X;X;X;X;X	XXXPPPPPPPPPPPPPPPPPPPPPPPXXXXX	GDQPAASGDS(1)DDDEPPPLPR	10	3	-0.1372			5779;5780;5781;5782;5783;5784;5785;5786;5787;8221	5782	74210	125570	94402	63724	54219	50497
sp|O00267|SPT5H_HUMAN	666	sp|O00267|SPT5H_HUMAN	sp|O00267|SPT5H_HUMAN	>sp|O00267|SPT5H_HUMAN Transcription elongation factor SPT5 OS=Homo sapiens OX=9606 GN=SUPT5H PE=1 SV=1	0.997818	1.59e-05	52.871	1	S	PRDVTNFTVGGFAPMSPRISSPMHPSAGGQR	X;X;X;X;X;X;X;X;X;X;X;X;X;X;Oxidation (M);Phospho (STY);X;X;X;X;X;X;X;X;X;X;X;X;X;X;X	XXPPPPPPPPPPPPPPPPXXXXXXXXXXXXX	DVTNFT(0.002)VGGFAPMS(0.998)PR	14	3	-1.067			3290;3291;3292	3290	19538	28228	22246	14728	14097	11795
sp|O00273|DFFA_HUMAN	315	sp|O00273|DFFA_HUMAN	sp|O00273|DFFA_HUMAN	>sp|O00273|DFFA_HUMAN DNA fragmentation factor subunit alpha OS=Homo sapiens OX=9606 GN=DFFA PE=1 SV=1	1	0.000254501	51.564	1	S	TQSLHSLRSISASKASPPGDLQNPKRARQDP	X;X;X;X;X;X;X;X;X;X;X;X;X;X;X;Phospho (STY);X;X;X;X;X;X;X;X;X;X;X;X;X;X;X	XXXXXXXXXXXXXXPPPPPPPPPPPXXXXXX	AS(1)PPGDLQNPK	2	3	0.13361			1866;1867	1867	26764	53167	40115	20844	19553	16463
sp|O00273|DFFA_HUMAN	107	sp|O00273|DFFA_HUMAN	sp|O00273|DFFA_HUMAN	>sp|O00273|DFFA_HUMAN DNA fragmentation factor subunit alpha OS=Homo sapiens OX=9606 GN=DFFA PE=1 SV=1	0.393343	9.63e-06	48.738		S	EKWAYNNSDGGTAWISQESFDVDETDSGAGL	X;X;X;X;X;X;X;X;X;X;X;X;X;X;X;Phospho (STY);X;X;X;X;X;X;X;X;X;X;X;X;X;X;X	XXPPPPPPPPPPPPPPPPPPPPPPPPPPPPP	WAYNNS(0.001)DGGT(0.001)AWIS(0.393)QES(0.393)FDVDET(0.191)DS(0.021)GAGLK	14	4	-0.91015				20433	0	0	0	0	0	0
sp|O00273|DFFA_HUMAN	110	sp|O00273|DFFA_HUMAN	sp|O00273|DFFA_HUMAN	>sp|O00273|DFFA_HUMAN DNA fragmentation factor subunit alpha OS=Homo sapiens OX=9606 GN=DFFA PE=1 SV=1	0.393343	9.63e-06	48.738		S	AYNNSDGGTAWISQESFDVDETDSGAGLKWK	X;X;X;X;X;X;X;X;X;X;X;X;X;X;X;X;X;X;X;X;X;X;X;X;X;X;X;X;X;X;X	XXXXXXXXXXXXXXXXXXXXXXXXXXXXXXX	WAYNNS(0.001)DGGT(0.001)AWIS(0.393)QES(0.393)FDVDET(0.191)DS(0.021)GAGLK	17	4	-0.91015				20433	0	0	0	0	0	0
sp|O00287|RFXAP_HUMAN	132	sp|O00287|RFXAP_HUMAN	sp|O00287|RFXAP_HUMAN	>sp|O00287|RFXAP_HUMAN Regulatory factor X-associated protein OS=Homo sapiens OX=9606 GN=RFXAP PE=1 SV=1	0.965661	0.0081324	26.138	1	S	HSGGEGSSGGARRRGSGGGSMSKTCTYEGCS	X;X;X;X;X;X;X;X;X;X;X;X;X;X;X;Phospho (STY);X;X;X;X;X;X;X;X;X;X;X;X;X;X;X	XXXXXXXXXXXXXPPPPPPPPPPXXXXXXXX	RGS(0.966)GGGS(0.034)MS(0.001)K	3	3	0.33679			13458	13458	6018.1	15539	10093	4818	4767.2	4716.4
sp|O00308|WWP2_HUMAN	211	sp|O00308|WWP2_HUMAN	sp|O00308|WWP2_HUMAN	>sp|O00308|WWP2_HUMAN NEDD4-like E3 ubiquitin-protein ligase WWP2 OS=Homo sapiens OX=9606 GN=WWP2 PE=1 SV=2	1	5.52e-14	121.73	1	S	HSGASARTTPATGEQSPGARSRHRQPVKNSG	X;X;X;X;X;X;X;X;X;X;X;X;X;X;X;Phospho (STY);X;X;X;X;X;X;X;X;X;X;X;X;X;X;X	XXXXXXXPPPPPPPPPPPPPXXXXXXXXXXX	TTPATGEQS(1)PGAR	9	3	0.99616			19130;19131;19132	19131	22433	36614	35988	16699	15361	15437
sp|O00391|QSOX1_HUMAN	426	sp|O00391|QSOX1_HUMAN	sp|O00391|QSOX1_HUMAN	>sp|O00391|QSOX1_HUMAN Sulfhydryl oxidase 1 OS=Homo sapiens OX=9606 GN=QSOX1 PE=1 SV=3	1	6.79e-10	121.16	1	S	FHFLTVQAARQNVDHSQEAAKAKEVLPAIRG	X;X;X;X;X;X;X;X;X;X;X;X;X;X;X;Phospho (STY);X;X;X;X;X;X;X;X;X;X;X;X;X;X;X	XXXXXXXXXXPPPPPPPPPPPXXXXXXXXXX	QNVDHS(1)QEAAK	6	3	-0.27921			12655;12656;12657	12657	26396	50289	42069	14453	12653	12764
sp|O00418|EF2K_HUMAN	445	sp|O00418|EF2K_HUMAN	sp|O00418|EF2K_HUMAN	>sp|O00418|EF2K_HUMAN Eukaryotic elongation factor 2 kinase OS=Homo sapiens OX=9606 GN=EEF2K PE=1 SV=2	0.998941	2.65e-09	81.436	1	S	DNHRESENSGDSGYPSEKRGELDDPEPREHG	X;X;X;X;X;X;X;X;X;X;X;X;X;X;X;Phospho (STY);X;X;X;X;X;X;X;X;X;X;X;X;X;X;X	XXXXPPPPPPPPPPPPPPPPPPPPPPPPXXX	ESENSGDS(0.001)GYPS(0.999)EK	12	2	0.14212			4791;4792;4793	4792	36561	44798	43252	26736	19637	20475
sp|O00418|EF2K_HUMAN	18	sp|O00418|EF2K_HUMAN	sp|O00418|EF2K_HUMAN	>sp|O00418|EF2K_HUMAN Eukaryotic elongation factor 2 kinase OS=Homo sapiens OX=9606 GN=EEF2K PE=1 SV=2	1	0.000659997	63.09	1	S	DEDLIFRLEGVDGGQSPRAGHDGDSDGDSDD	X;X;X;X;X;X;X;X;X;X;X;X;X;X;X;Phospho (STY);X;X;X;X;X;X;X;X;X;X;X;X;X;X;X	XXXXXXXPPPPPPPPPPPXXXXXXXXXXXXX	LEGVDGGQS(1)PR	9	2	0.66798			10317;10318	10318	47500	66762	62321	33304	29316	27515
sp|O00423|EMAL1_HUMAN	113	sp|O00423|EMAL1_HUMAN	sp|O00423|EMAL1_HUMAN	>sp|O00423|EMAL1_HUMAN Echinoderm microtubule-associated protein-like 1 OS=Homo sapiens OX=9606 GN=EML1 PE=1 SV=3	0.66806	0.000462613	46.387	1	S	NNGTVLPKKPTGSLPSPSGVRKETAVPATKS	X;X;X;X;X;X;X;X;X;X;X;X;X;X;X;Phospho (STY);X;X;X;X;X;X;X;X;X;X;X;X;X;X;X	XXXXXXXXPPPPPPPPPPPPPXXXXXXXXXX	KPTGS(0.005)LPS(0.668)PS(0.327)GVR	8	3	0.010021			9527	9527	19394	24280	23233	13136	13032	14840
sp|O00423|EMAL1_HUMAN	160	sp|O00423|EMAL1_HUMAN	sp|O00423|EMAL1_HUMAN	>sp|O00423|EMAL1_HUMAN Echinoderm microtubule-associated protein-like 1 OS=Homo sapiens OX=9606 GN=EML1 PE=1 SV=3	0.634659	0.000132952	79.248	1	S	RESNGDSRGNRNRTGSTSSSSSGKKNSESKP	X;X;X;X;X;X;X;X;X;X;X;X;X;X;X;Phospho (STY);X;X;X;X;X;X;X;X;X;X;X;X;X;X;X	XXXXXXXXXXXXXPPPPPPPPPPPXXXXXXX	T(0.008)GS(0.635)T(0.327)S(0.027)S(0.002)SSSGK	3	2	-0.31284			18396;18397	18396	31811	17460	18585	21616	19151	15267
sp|O00423|EMAL1_HUMAN	162	sp|O00423|EMAL1_HUMAN	sp|O00423|EMAL1_HUMAN	>sp|O00423|EMAL1_HUMAN Echinoderm microtubule-associated protein-like 1 OS=Homo sapiens OX=9606 GN=EML1 PE=1 SV=3	0.465602	0.000131109	76.258		S	SNGDSRGNRNRTGSTSSSSSGKKNSESKPKE	X;X;X;X;X;X;X;X;X;X;X;X;X;X;X;Phospho (STY);X;X;X;X;X;X;X;X;X;X;X;X;X;X;X	XXXXXXXXXXXPPPPPPPPPPPXXXXXXXXX	T(0.085)GS(0.223)T(0.223)S(0.466)S(0.003)SSSGK	5	2	-0.6032				18398	0	0	0	0	0	0
sp|O00429|DNM1L_HUMAN	616	sp|O00429|DNM1L_HUMAN	sp|O00429|DNM1L_HUMAN	>sp|O00429|DNM1L_HUMAN Dynamin-1-like protein OS=Homo sapiens OX=9606 GN=DNM1L PE=1 SV=2	1	3.6e-06	83.563	1	S	LLAEEKSKPIPIMPASPQKGHAVNLLDVPVP	X;X;X;X;X;X;X;X;X;X;X;X;X;X;X;Phospho (STY);X;X;X;X;X;X;X;X;X;X;X;X;X;X;X	XXXXXXPPPPPPPPPPPPPXXXXXXXXXXXX	SKPIPIMPAS(1)PQK	10	3	-0.56218			15804;15805;15806	15806	44671	83249	68493	32625	41053	36385
sp|O00443|P3C2A_HUMAN	259	sp|O00443|P3C2A_HUMAN	sp|O00443|P3C2A_HUMAN	>sp|O00443|P3C2A_HUMAN Phosphatidylinositol 4-phosphate 3-kinase C2 domain-containing subunit alpha OS=Homo sapiens OX=9606 GN=PIK3C2A PE=1 SV=2	0.999999	0.00242914	60.316	1	S	TDLEITDSKVSNLQVSPKSEDISKFDWLDLD	X;X;X;X;X;X;X;X;X;X;X;X;X;X;X;Phospho (STY);X;X;X;X;X;X;X;X;X;X;X;X;X;X;X	XXXXXXXXXPPPPPPPPPXXXXXXXXXXXXX	VSNLQVS(1)PK	7	2	0.67442			20220;20221;20222;20223;20224	20224	42057	68756	62692	38053	45845	42077
sp|O00470|MEIS1_HUMAN	194	sp|O00470|MEIS1_HUMAN	sp|O00470|MEIS1_HUMAN	>sp|O00470|MEIS1_HUMAN Homeobox protein Meis1 OS=Homo sapiens OX=9606 GN=MEIS1 PE=1 SV=1	0.629594	7.85e-07	85.83	1	S	GKMPIDLVIDDREGGSKSDSEDITRSANLTD	X;X;X;X;X;X;X;X;X;X;X;X;X;X;X;Phospho (STY);X;X;X;X;X;X;X;X;X;X;X;X;X;X;X	XXXXXXXXXXXXPPPPPPPPPPPPPXXXXXX	EGGS(0.63)KS(0.351)DS(0.019)EDITR	4	3	0.44524			3946	3946	14322	11497	10783	10448	7864.1	8702.6
sp|O00470|MEIS1_HUMAN	196	sp|O00470|MEIS1_HUMAN	sp|O00470|MEIS1_HUMAN	>sp|O00470|MEIS1_HUMAN Homeobox protein Meis1 OS=Homo sapiens OX=9606 GN=MEIS1 PE=1 SV=1	0.794643	2.22e-06	88.22	1	S	MPIDLVIDDREGGSKSDSEDITRSANLTDQP	X;X;X;X;X;X;X;X;X;X;X;X;X;X;X;Phospho (STY);X;X;X;X;X;X;X;X;X;X;X;X;X;X;X	XXXXXXXXXXPPPPPPPPPPPPPXXXXXXXX	EGGS(0.01)KS(0.795)DS(0.195)EDITR	6	2	0.18704			3943;3945;3947	3947	46697	38098	34363	36557	27907	26884
sp|O00470|MEIS1_HUMAN	198	sp|O00470|MEIS1_HUMAN	sp|O00470|MEIS1_HUMAN	>sp|O00470|MEIS1_HUMAN Homeobox protein Meis1 OS=Homo sapiens OX=9606 GN=MEIS1 PE=1 SV=1	0.694423	0.000726413	44.857	1	S	IDLVIDDREGGSKSDSEDITRSANLTDQPSW	X;X;X;X;X;X;X;X;X;X;X;X;X;X;X;Phospho (STY);X;X;X;X;X;X;X;X;X;X;X;X;X;X;X	XXXXXXXXPPPPPPPPPPPPPXXXXXXXXXX	EGGS(0.035)KS(0.121)DS(0.694)EDIT(0.149)R	8	2	-0.70976			3944	3944	9375.9	7559.7	7117.1	6999.3	5321.4	5681.1
sp|O00499|BIN1_HUMAN	296	sp|O00499|BIN1_HUMAN	sp|O00499|BIN1_HUMAN	>sp|O00499|BIN1_HUMAN Myc box-dependent-interacting protein 1 OS=Homo sapiens OX=9606 GN=BIN1 PE=1 SV=1	0.999968	4.09e-13	92.416	1;2	S	VKAQPSDNAPAKGNKSPSPPDGSPAATPEIR	X;X;X;X;X;X;X;X;X;X;X;X;X;X;X;Phospho (STY);X;Phospho (STY);X;X;X;X;Phospho (STY);X;X;X;X;X;X;X;X	XXXXXXXXXXXXPPPPPPPPPPPPPPPPPPP	GNKS(1)PS(1)PPDGSPAATPEIR	4	3	-0.36656			6476;6477;6478;6479;6480;16586;16588;16589;16590;16592;16593;16595	6480	150500	222180	188770	122380	110340	101670
sp|O00499|BIN1_HUMAN	298	sp|O00499|BIN1_HUMAN	sp|O00499|BIN1_HUMAN	>sp|O00499|BIN1_HUMAN Myc box-dependent-interacting protein 1 OS=Homo sapiens OX=9606 GN=BIN1 PE=1 SV=1	0.999958	1.01e-13	92.403	1;2	S	AQPSDNAPAKGNKSPSPPDGSPAATPEIRVN	X;X;X;X;X;X;X;X;X;X;X;X;X;Phospho (STY);X;Phospho (STY);X;X;X;X;Phospho (STY);X;X;X;X;X;X;X;X;X;X	XXXXXXXXXXPPPPPPPPPPPPPPPPPPPXX	GNKS(1)PS(1)PPDGSPAATPEIR	6	3	-0.36656			6473;6475;6476;6478;6479;6480;16587;16591;16594;16595;16596	6480	124990	189740	150260	105160	92558	82859
sp|O00499|BIN1_HUMAN	303	sp|O00499|BIN1_HUMAN	sp|O00499|BIN1_HUMAN	>sp|O00499|BIN1_HUMAN Myc box-dependent-interacting protein 1 OS=Homo sapiens OX=9606 GN=BIN1 PE=1 SV=1	0.999974	2.11e-11	92.416	2	S	NAPAKGNKSPSPPDGSPAATPEIRVNHEPEP	X;X;X;X;X;X;X;X;Phospho (STY);X;Phospho (STY);X;X;X;X;Phospho (STY);X;X;X;X;X;X;X;X;X;X;X;X;X;X;X	XXXXXPPPPPPPPPPPPPPPPPPPXXXXXXX	S(0.5)PS(0.5)PPDGS(1)PAATPEIR	8	3	0.20217			6477;6479;16592;16593;16594;16595;16596	16595	92101	134590	108780	69476	63430	57599
sp|O00505|IMA4_HUMAN	56	sp|O00505|IMA4_HUMAN	sp|O00505|IMA4_HUMAN	>sp|O00505|IMA4_HUMAN Importin subunit alpha-4 OS=Homo sapiens OX=9606 GN=KPNA3 PE=1 SV=2	0.999452	6.6e-07	71.98	1	S	RDEHLLKKRNVPQEESLEDSDVDADFKAQNV	X;X;X;X;X;X;X;X;X;X;X;X;X;X;X;Phospho (STY);X;X;X;X;X;X;X;X;X;X;X;X;X;X;X	XXXXXXXXXPPPPPPPPPPPPPPPPPPXXXX	NVPQEES(0.999)LEDS(0.001)DVDADFK	7	3	-0.42112			12019	12019	10844	17830	22324	9185	9074	9964.7
sp|O00505|IMA4_HUMAN	60	sp|O00505|IMA4_HUMAN	sp|O00505|IMA4_HUMAN	>sp|O00505|IMA4_HUMAN Importin subunit alpha-4 OS=Homo sapiens OX=9606 GN=KPNA3 PE=1 SV=2	0.999997	3.33e-15	105.84	1	S	LLKKRNVPQEESLEDSDVDADFKAQNVTLEA	X;X;X;X;X;X;X;X;X;X;X;X;X;X;X;Phospho (STY);X;X;X;X;X;X;X;X;X;X;X;X;X;X;X	XXXXXPPPPPPPPPPPPPPPPPPXXXXXXXX	NVPQEESLEDS(1)DVDADFK	11	3	0.74538			12015;12016;12017;12018;12020;12021	12015	193090	155930	127960	151450	113460	99579
sp|O00512|BCL9_HUMAN	687	sp|O00512|BCL9_HUMAN	sp|O00512|BCL9_HUMAN	>sp|O00512|BCL9_HUMAN B-cell CLL/lymphoma 9 protein OS=Homo sapiens OX=9606 GN=BCL9 PE=1 SV=4	0.872036	0.00081248	58.166	1	S	GNNPIFPRIPVEGPLSPSRGDFPKGIPPQMG	X;X;X;X;X;X;X;X;X;X;X;X;X;X;X;Phospho (STY);X;X;X;X;X;X;X;X;X;X;X;X;X;X;X	XXXXXXXXPPPPPPPPPPPXXXXXXXXXXXX	IPVEGPLS(0.872)PS(0.128)R	8	2	-0.55258			8074	8074	19071	23990	24344	12905	11144	11507
sp|O00515|LAD1_HUMAN	177	sp|O00515|LAD1_HUMAN	sp|O00515|LAD1_HUMAN	>sp|O00515|LAD1_HUMAN Ladinin-1 OS=Homo sapiens OX=9606 GN=LAD1 PE=1 SV=2	1	0.000399222	57.673	1	S	VGREPEERKKGVPEKSPVLEKSSMPKKTAPE	X;X;X;X;X;X;X;X;X;X;X;X;X;X;X;Phospho (STY);X;X;X;X;X;X;X;X;X;X;X;X;X;X;X	XXXXXXXXXXPPPPPPPPPPPXXXXXXXXXX	GVPEKS(1)PVLEK	6	3	-0.45208			7408;7409;7410	7410	51248	153290	119850	31259	33906	31256
sp|O00515|LAD1_HUMAN	347	sp|O00515|LAD1_HUMAN	sp|O00515|LAD1_HUMAN	>sp|O00515|LAD1_HUMAN Ladinin-1 OS=Homo sapiens OX=9606 GN=LAD1 PE=1 SV=2	0.99772	0.000941788	40.967	2	S	VASRLPPVTLQVKIPSKEEEADMSSPTQRTY	X;X;X;X;X;X;X;X;X;X;X;X;X;X;X;Phospho (STY);X;X;X;X;X;X;X;Phospho (STY);X;X;X;X;X;X;X	XXXXXXXXXXXXXPPPPPPPPPPPPPPPPXX	IPS(0.998)KEEEADMS(0.489)S(0.489)PT(0.024)QR	3	3	0.53874			8070	8070	9691.5	24041	35292	8441.2	10036	10308
sp|O00515|LAD1_HUMAN	355	sp|O00515|LAD1_HUMAN	sp|O00515|LAD1_HUMAN	>sp|O00515|LAD1_HUMAN Ladinin-1 OS=Homo sapiens OX=9606 GN=LAD1 PE=1 SV=2	0.612202	2.95e-07	72.299	1	S	TLQVKIPSKEEEADMSSPTQRTYSSSLKRSS	X;X;X;X;X;X;X;Phospho (STY);X;X;X;X;X;X;Oxidation (M);Phospho (STY);X;X;X;X;X;X;X;X;X;X;X;X;X;X;X	XXXXXPPPPPPPPPPPPPPPPXXXXXXXXXX	IPSKEEEADMS(0.612)S(0.382)PT(0.006)QR	11	3	-0.83048			8064;8068	8068	22962	89506	72012	15522	16450	14665
sp|O00515|LAD1_HUMAN	356	sp|O00515|LAD1_HUMAN	sp|O00515|LAD1_HUMAN	>sp|O00515|LAD1_HUMAN Ladinin-1 OS=Homo sapiens OX=9606 GN=LAD1 PE=1 SV=2	0.974433	3.29e-35	156.65	1	S	LQVKIPSKEEEADMSSPTQRTYSSSLKRSSP	X;X;X;X;X;X;X;X;X;X;X;X;X;Oxidation (M);X;Phospho (STY);X;X;X;X;X;X;X;X;X;X;X;X;X;X;X	XXXXPPPPPPPPPPPPPPPPXXXXXXXXXXX	IPSKEEEADMS(0.024)S(0.974)PT(0.002)QR	12	3	0.098388			8065;8066;8067;8069	8067	30540	137890	104330	18542	22102	19294
sp|O00515|LAD1_HUMAN	38	sp|O00515|LAD1_HUMAN	sp|O00515|LAD1_HUMAN	>sp|O00515|LAD1_HUMAN Ladinin-1 OS=Homo sapiens OX=9606 GN=LAD1 PE=1 SV=2	0.995009	1.66e-07	99.484	1;2	S	EEEQERERRRRHRNLSSTTDDEAPRLSQNGD	X;X;X;X;X;X;X;X;X;X;X;X;X;X;X;Phospho (STY);Phospho (STY);X;X;X;X;X;X;X;X;X;X;X;X;X;X	XXXXXXXXXXXXXPPPPPPPPPPPPXXXXXX	NLS(0.995)S(0.976)T(0.028)T(0.001)DDEAPR	3	2	0.60437			11853;11855;11856;11857	11856	33182	66124	90914	27906	27425	24585
sp|O00515|LAD1_HUMAN	39	sp|O00515|LAD1_HUMAN	sp|O00515|LAD1_HUMAN	>sp|O00515|LAD1_HUMAN Ladinin-1 OS=Homo sapiens OX=9606 GN=LAD1 PE=1 SV=2	0.976208	7.86e-07	101.7	2	S	EEQERERRRRHRNLSSTTDDEAPRLSQNGDR	X;X;X;X;X;X;X;X;X;X;X;X;X;X;Phospho (STY);Phospho (STY);X;X;X;X;X;X;X;X;X;X;X;X;X;X;X	XXXXXXXXXXXXPPPPPPPPPPPPXXXXXXX	NLS(0.995)S(0.976)T(0.028)T(0.001)DDEAPR	4	2	0.60437			11855;11856;11857	11856	28083	53355	74902	24442	23634	21596
sp|O00515|LAD1_HUMAN	512	sp|O00515|LAD1_HUMAN	sp|O00515|LAD1_HUMAN	>sp|O00515|LAD1_HUMAN Ladinin-1 OS=Homo sapiens OX=9606 GN=LAD1 PE=1 SV=2	0.909282	0.000485632	111.58	1	S	SSATERTQWGQKSDSSLDAEV__________	X;X;X;X;X;X;X;X;X;X;X;X;X;X;X;Phospho (STY);X;X;X;X;X;X;X;X;X;X;X;X;X;X;X	XXXXXXXXXXXXPPPPPPPPPXXXXXXXXXX	S(0.012)DS(0.079)S(0.909)LDAEV	4	2	0.16544			15076;15077	15077	19705	32228	36698	16037	16019	16893
sp|O00559|RCAS1_HUMAN	36	sp|O00559|RCAS1_HUMAN	sp|O00559|RCAS1_HUMAN	>sp|O00559|RCAS1_HUMAN Receptor-binding cancer antigen expressed on SiSo cells OS=Homo sapiens OX=9606 GN=EBAG9 PE=1 SV=1	0.994608	1.01e-31	121.82	1	S	FLKRLICRSGRGRKLSGDQITLPTTVDYSSV	X;X;X;X;X;X;X;X;X;X;X;X;X;X;X;Phospho (STY);X;X;X;X;X;X;X;X;X;X;X;X;X;X;X	XXXXXXXXXXXXXPPPPPPPPPPPPPPPPPP	KLS(0.995)GDQIT(0.005)LPTTVDYSSVPK	3	4	-0.177			9274;9275;9276;9277;9278;9279	9278	121000	163960	118330	74027	76637	68636
sp|O00566|MPP10_HUMAN	242	sp|O00566|MPP10_HUMAN	sp|O00566|MPP10_HUMAN	>sp|O00566|MPP10_HUMAN U3 small nucleolar ribonucleoprotein protein MPP10 OS=Homo sapiens OX=9606 GN=MPHOSPH10 PE=1 SV=2	0.999938	1.98e-15	89.388	1	S	NDEEEEDIDFFEDIDSDEDEGGLFGSKKLKS	X;X;X;X;X;X;X;X;X;X;X;X;X;X;X;Phospho (STY);X;X;X;X;X;X;X;X;X;X;X;X;X;X;X	PPPPPPPPPPPPPPPPPPPPPPPPPPPXXXX	KDDNDEEEEDIDFFEDIDS(1)DEDEGGLFGSK	19	4	0.81989			8520	8520	4729.2	6430.1	3202.8	4059.3	3048.6	1918.1
sp|O00566|MPP10_HUMAN	163	sp|O00566|MPP10_HUMAN	sp|O00566|MPP10_HUMAN	>sp|O00566|MPP10_HUMAN U3 small nucleolar ribonucleoprotein protein MPP10 OS=Homo sapiens OX=9606 GN=MPHOSPH10 PE=1 SV=2	0.947987	5.28e-06	60.245	3	S	MGERAENSSKSDLRKSPVFSDEDSDLDFDIS	X;X;X;X;X;X;X;X;X;X;X;X;X;X;X;Phospho (STY);X;X;X;Phospho (STY);X;X;X;Phospho (STY);X;X;X;X;X;X;X	XXXXXXXXXXPPPPPPPPPPPPPPPPPPPPP	S(0.052)DLRKS(0.948)PVFS(1)DEDS(0.999)DLDFDIS(0.001)K	6	4	0.21337			15034;15035	15035	14931	19128	16585	10606	10314	11237
sp|O00566|MPP10_HUMAN	167	sp|O00566|MPP10_HUMAN	sp|O00566|MPP10_HUMAN	>sp|O00566|MPP10_HUMAN U3 small nucleolar ribonucleoprotein protein MPP10 OS=Homo sapiens OX=9606 GN=MPHOSPH10 PE=1 SV=2	0.999567	3.63e-06	62.295	2;3	S	AENSSKSDLRKSPVFSDEDSDLDFDISKLEQ	X;X;X;X;X;X;X;X;X;X;X;Phospho (STY);X;X;X;Phospho (STY);X;X;X;Phospho (STY);X;X;X;X;X;X;X;X;X;X;X	XXXXXXPPPPPPPPPPPPPPPPPPPPPPXXX	S(0.052)DLRKS(0.948)PVFS(1)DEDS(0.999)DLDFDIS(0.001)K	10	4	0.21337			9756;15034;15035	15035	21538	27673	25520	15832	15919	16349
sp|O00566|MPP10_HUMAN	171	sp|O00566|MPP10_HUMAN	sp|O00566|MPP10_HUMAN	>sp|O00566|MPP10_HUMAN U3 small nucleolar ribonucleoprotein protein MPP10 OS=Homo sapiens OX=9606 GN=MPHOSPH10 PE=1 SV=2	0.999735	3.63e-06	62.295	2;3	S	SKSDLRKSPVFSDEDSDLDFDISKLEQQSKV	X;X;X;X;X;X;X;Phospho (STY);X;X;X;Phospho (STY);X;X;X;Phospho (STY);X;X;X;X;X;X;X;X;X;X;X;X;X;X;X	XXPPPPPPPPPPPPPPPPPPPPPPXXXXXXX	KS(0.024)PVFS(0.977)DEDS(1)DLDFDISK	10	3	1.2554			9756;15034;15035	9756	21538	27673	25520	15832	15919	16349
sp|O00567|NOP56_HUMAN	519	sp|O00567|NOP56_HUMAN	sp|O00567|NOP56_HUMAN	>sp|O00567|NOP56_HUMAN Nucleolar protein 56 OS=Homo sapiens OX=9606 GN=NOP56 PE=1 SV=4	0.535463	3.13e-05	56.227	1	S	SKPKKKKSFSKEELMSSDLEETAGSTSIPKR	X;X;X;X;X;X;X;X;X;X;X;X;X;X;Oxidation (M);Phospho (STY);X;X;X;X;X;X;X;X;X;X;X;X;X;X;X	XXXXXXXXXXXPPPPPPPPPPPPPPPPPPPX	EELMS(0.535)S(0.464)DLEET(0.001)AGSTSIPK	5	3	2.8993			3741	3741	8544.4	12968	11996	7790.3	6853.6	7007.5
sp|O00567|NOP56_HUMAN	520	sp|O00567|NOP56_HUMAN	sp|O00567|NOP56_HUMAN	>sp|O00567|NOP56_HUMAN Nucleolar protein 56 OS=Homo sapiens OX=9606 GN=NOP56 PE=1 SV=4	0.884367	1.71e-54	173.89	1	S	KPKKKKSFSKEELMSSDLEETAGSTSIPKRK	X;X;X;X;X;X;X;X;X;X;X;X;X;Oxidation (M);X;Phospho (STY);X;X;X;X;X;X;X;X;X;X;X;X;X;X;X	XXXXXXPPPPPPPPPPPPPPPPPPPPPPPXX	EELMS(0.116)S(0.884)DLEETAGSTSIPK	6	3	-1.219			3738;3739;3740;15315;15316;15317;15318;15319;15320;15321;15322;15323;15324;15325	3740	198160	262500	180090	130640	127060	107950
sp|O00567|NOP56_HUMAN	569	sp|O00567|NOP56_HUMAN	sp|O00567|NOP56_HUMAN	>sp|O00567|NOP56_HUMAN Nucleolar protein 56 OS=Homo sapiens OX=9606 GN=NOP56 PE=1 SV=4	1	1.57e-06	70.771	2;3	S	SGSKKKRKFSKEEPVSSGPEEAVGKSSSKKK	X;X;X;X;X;X;X;X;X;Phospho (STY);X;X;X;X;X;Phospho (STY);Phospho (STY);X;X;X;X;X;X;X;X;X;X;X;X;X;X	XXXXXXXPPPPPPPPPPPPPPPPPPXXXXXX	KFS(1)KEEPVS(1)S(1)GPEEAVGK	9	4	-0.20448			8902;8903	8903	23195	52829	39386	18019	30976	29118
sp|O00567|NOP56_HUMAN	570	sp|O00567|NOP56_HUMAN	sp|O00567|NOP56_HUMAN	>sp|O00567|NOP56_HUMAN Nucleolar protein 56 OS=Homo sapiens OX=9606 GN=NOP56 PE=1 SV=4	1	1.57e-06	71.446	1;2;3	S	GSKKKRKFSKEEPVSSGPEEAVGKSSSKKKK	X;X;X;X;X;X;X;X;Phospho (STY);X;X;X;X;X;Phospho (STY);Phospho (STY);X;X;X;X;X;X;X;X;X;X;X;X;X;X;X	XXXXXXPPPPPPPPPPPPPPPPPPXXXXXXX	KFS(1)KEEPVS(1)S(1)GPEEAVGK	10	4	-0.20448			3745;3746;8902;8903	8903	51920	109090	86015	39967	61668	55541
sp|O00567|NOP56_HUMAN	563	sp|O00567|NOP56_HUMAN	sp|O00567|NOP56_HUMAN	>sp|O00567|NOP56_HUMAN Nucleolar protein 56 OS=Homo sapiens OX=9606 GN=NOP56 PE=1 SV=4	1	2.58e-20	99.179	1;3	S	EEAGHRSGSKKKRKFSKEEPVSSGPEEAVGK	X;X;X;X;X;X;X;X;X;X;X;X;X;X;X;Phospho (STY);X;X;X;X;X;Phospho (STY);Phospho (STY);X;X;X;X;X;X;X;X	XXXXXXXXXXXXXPPPPPPPPPPPPPPPPPP	KFS(1)KEEPVS(1)S(1)GPEEAVGK	3	4	-0.20448			8901;8903	8903	21505	62718	39684	17699	28852	27614
sp|O00629|IMA3_HUMAN	60	sp|O00629|IMA3_HUMAN	sp|O00629|IMA3_HUMAN	>sp|O00629|IMA3_HUMAN Importin subunit alpha-3 OS=Homo sapiens OX=9606 GN=KPNA4 PE=1 SV=1	1	1.72e-15	115.42	1	S	LLKRRNVPHEDICEDSDIDGDYRVQNTSLEA	X;X;X;X;X;X;X;X;X;X;X;X;X;X;X;Phospho (STY);X;X;X;X;X;X;X;X;X;X;X;X;X;X;X	XXXXXPPPPPPPPPPPPPPPPPPXXXXXXXX	NVPHEDICEDS(1)DIDGDYR	11	3	-0.4301			12012;12013;12014	12014	30207	34208	27392	23596	17928	17290
sp|O00712|NFIB_HUMAN	311	sp|O00712|NFIB_HUMAN	sp|O00712|NFIB_HUMAN	>sp|O00712|NFIB_HUMAN Nuclear factor 1 B-type OS=Homo sapiens OX=9606 GN=NFIB PE=1 SV=2	0.477987	0.00746552	28.958		S	PAAGSRTWHERDQDMSSPTTMKKPEKPLFSS	X;X;X;X;X;X;X;X;X;X;X;X;X;X;X;Phospho (STY);X;X;X;X;X;X;X;X;X;X;X;X;X;X;X	XXXXXXXXXXXPPPPPPPPPPPXXXXXXXXX	DQDMS(0.478)S(0.478)PT(0.035)T(0.009)MK	5	3	-0.76772				3012	0	0	0	0	0	0
sp|O00712|NFIB_HUMAN	312	sp|O00712|NFIB_HUMAN	sp|O00712|NFIB_HUMAN	>sp|O00712|NFIB_HUMAN Nuclear factor 1 B-type OS=Homo sapiens OX=9606 GN=NFIB PE=1 SV=2	0.477987	0.00746552	28.958		S	AAGSRTWHERDQDMSSPTTMKKPEKPLFSSA	X;X;X;X;X;X;X;X;X;X;X;X;X;X;X;X;X;X;X;X;X;X;X;X;X;X;X;X;X;X;X	XXXXXXXXXXXXXXXXXXXXXXXXXXXXXXX	DQDMS(0.478)S(0.478)PT(0.035)T(0.009)MK	6	3	-0.76772				3012	0	0	0	0	0	0
sp|O00712|NFIB_HUMAN	328	sp|O00712|NFIB_HUMAN	sp|O00712|NFIB_HUMAN	>sp|O00712|NFIB_HUMAN Nuclear factor 1 B-type OS=Homo sapiens OX=9606 GN=NFIB PE=1 SV=2	0.995287	9.08e-11	95.939	1;2	S	PTTMKKPEKPLFSSASPQDSSPRLSTFPQHH	X;X;X;X;X;X;X;X;X;X;X;X;X;X;X;Phospho (STY);X;X;X;Phospho (STY);X;X;X;X;X;X;X;X;X;X;X	XXXXXPPPPPPPPPPPPPPPPPPXXXXXXXX	KPEKPLFSS(0.003)AS(0.995)PQDS(0.001)S(0.001)PR	11	4	0.020914			9419;9420;9421;9422;9423	9419	62373	116740	95683	48797	53044	50810
sp|O00712|NFIB_HUMAN	332	sp|O00712|NFIB_HUMAN	sp|O00712|NFIB_HUMAN	>sp|O00712|NFIB_HUMAN Nuclear factor 1 B-type OS=Homo sapiens OX=9606 GN=NFIB PE=1 SV=2	0.537168	4.46e-08	85.513	1;2	S	KKPEKPLFSSASPQDSSPRLSTFPQHHHPGI	X;X;X;X;X;X;X;X;X;X;X;Phospho (STY);X;X;X;Phospho (STY);X;X;X;X;X;X;X;X;X;X;X;X;X;X;X	XPPPPPPPPPPPPPPPPPPXXXXXXXXXXXX	KPEKPLFS(0.002)S(0.033)AS(0.965)PQDS(0.537)S(0.463)PR	15	4	1.1462			9418;9422;9423	9423	45503	80881	70796	33904	38073	39241
sp|O00712|NFIB_HUMAN	333	sp|O00712|NFIB_HUMAN	sp|O00712|NFIB_HUMAN	>sp|O00712|NFIB_HUMAN Nuclear factor 1 B-type OS=Homo sapiens OX=9606 GN=NFIB PE=1 SV=2	0.500041	4.46e-08	85.513	1;2	S	KPEKPLFSSASPQDSSPRLSTFPQHHHPGIP	X;X;X;X;X;X;X;X;X;X;X;X;X;X;X;X;X;X;X;X;X;X;X;X;X;X;X;X;X;X;X	XXXXXXXXXXXXXXXXXXXXXXXXXXXXXXX	KPEKPLFS(0.023)S(0.06)AS(0.917)PQDS(0.5)S(0.5)PR	16	4	0.16818			9418;9422	9422	28937	49826	43780	20763	23826	24877
sp|O00712|NFIB_HUMAN	262	sp|O00712|NFIB_HUMAN	sp|O00712|NFIB_HUMAN	>sp|O00712|NFIB_HUMAN Nuclear factor 1 B-type OS=Homo sapiens OX=9606 GN=NFIB PE=1 SV=2	0.624362	0.00296589	42.718	2	S	QPYYHDMNSGVNLQRSLSSPPSSKRPKTISI	X;X;X;X;X;X;X;X;X;X;X;X;X;X;X;Phospho (STY);X;Phospho (STY);X;X;X;X;X;X;X;X;X;X;X;X;X	XXXXXXXXXXXXXXXPPPPPPPPPXXXXXXX	S(0.624)LS(0.62)S(0.578)PPS(0.154)S(0.024)K	1	2	0.038013			16227	16227	17727	32016	29352	13903	15098	15036
sp|O00712|NFIB_HUMAN	264	sp|O00712|NFIB_HUMAN	sp|O00712|NFIB_HUMAN	>sp|O00712|NFIB_HUMAN Nuclear factor 1 B-type OS=Homo sapiens OX=9606 GN=NFIB PE=1 SV=2	0.98493	0.000811865	64.675	1;2	S	YYHDMNSGVNLQRSLSSPPSSKRPKTISIDE	X;X;X;X;X;X;X;X;X;X;X;X;X;Phospho (STY);X;Phospho (STY);Phospho (STY);X;X;X;X;X;X;X;X;X;X;X;X;X;X	XXXXXXXXXXXXXPPPPPPPPPXXXXXXXXX	S(0.02)LS(0.985)S(0.893)PPS(0.082)S(0.02)K	3	2	0.63093			16222;16223;16225;16226;16227;16228	16228	113460	163080	144290	68893	74019	70312
sp|O00712|NFIB_HUMAN	265	sp|O00712|NFIB_HUMAN	sp|O00712|NFIB_HUMAN	>sp|O00712|NFIB_HUMAN Nuclear factor 1 B-type OS=Homo sapiens OX=9606 GN=NFIB PE=1 SV=2	0.945866	0.00125881	58.704	2	S	YHDMNSGVNLQRSLSSPPSSKRPKTISIDEN	X;X;X;X;X;X;X;X;X;X;X;X;X;X;Phospho (STY);Phospho (STY);X;X;X;X;X;X;X;X;X;X;X;X;X;X;X	XXXXXXXXXXXXPPPPPPPPPXXXXXXXXXX	S(0.095)LS(0.935)S(0.946)PPS(0.021)S(0.003)K	4	2	0.52316			16226;16227;16228	16226	52512	91477	78841	41231	44044	42706
sp|O14495|PLPP3_HUMAN	297	sp|O14495|PLPP3_HUMAN	sp|O14495|PLPP3_HUMAN	>sp|O14495|PLPP3_HUMAN Phospholipid phosphatase 3 OS=Homo sapiens OX=9606 GN=PLPP3 PE=1 SV=1	1	0.000455904	68.334	1	S	TTLSLPAPAIRKEILSPVDIIDRNNHHNMM_	X;X;X;X;X;X;X;X;X;X;X;X;X;X;X;Phospho (STY);X;X;X;X;X;X;X;X;X;X;X;X;X;X;X	XXXXXXXXXXXXPPPPPPPPPPPXXXXXXXX	EILS(1)PVDIIDR	4	2	0.096512			4111	4111	6825.4	10103	8938.9	5704.2	7117.3	6691.4
sp|O14497|ARI1A_HUMAN	696	sp|O14497|ARI1A_HUMAN	sp|O14497|ARI1A_HUMAN	>sp|O14497|ARI1A_HUMAN AT-rich interactive domain-containing protein 1A OS=Homo sapiens OX=9606 GN=ARID1A PE=1 SV=3	0.917576	1.54e-07	73.795	1	S	FSPHTSPHLPGIRGPSPSPVGSPASVAQSRS	X;X;X;X;X;X;X;X;X;X;X;X;X;X;X;Phospho (STY);X;X;X;X;X;X;X;X;X;X;X;X;X;X;X	XXXXXXXXXXXXXPPPPPPPPPPPPPPPPPX	GPS(0.918)PS(0.082)PVGSPASVAQSR	3	3	1.575			6736;6738	6736	25904	41312	37162	20679	18171	17285
sp|O14497|ARI1A_HUMAN	698	sp|O14497|ARI1A_HUMAN	sp|O14497|ARI1A_HUMAN	>sp|O14497|ARI1A_HUMAN AT-rich interactive domain-containing protein 1A OS=Homo sapiens OX=9606 GN=ARID1A PE=1 SV=3	0.49157	0.0174264	34.825		S	PHTSPHLPGIRGPSPSPVGSPASVAQSRSGP	X;X;X;X;X;X;X;X;X;X;X;X;X;X;X;X;X;X;X;X;X;X;X;X;X;X;X;X;X;X;X	XXXXXXXXXXXXXXXXXXXXXXXXXXXXXXX	GPS(0.492)PS(0.492)PVGS(0.014)PAS(0.002)VAQS(0.001)R	5	2	1.3333				6737	0	0	0	0	0	0
sp|O14497|ARI1A_HUMAN	1184	sp|O14497|ARI1A_HUMAN	sp|O14497|ARI1A_HUMAN	>sp|O14497|ARI1A_HUMAN AT-rich interactive domain-containing protein 1A OS=Homo sapiens OX=9606 GN=ARID1A PE=1 SV=3	0.773577	1.89e-10	83.623	1	S	PHSQIPPLPGMSRSNSVGIQDAFNDGSDSTF	X;X;X;X;X;X;X;X;X;X;X;X;X;X;X;Phospho (STY);X;X;X;X;X;X;X;X;X;X;X;X;X;X;X	XXXXXXXXXXXXXPPPPPPPPPPPPPPPPPP	S(0.226)NS(0.774)VGIQDAFNDGSDSTFQK	3	3	0.34528			16365	16365	15809	33492	21940	10856	11692	10701
sp|O14497|ARI1A_HUMAN	1755	sp|O14497|ARI1A_HUMAN	sp|O14497|ARI1A_HUMAN	>sp|O14497|ARI1A_HUMAN AT-rich interactive domain-containing protein 1A OS=Homo sapiens OX=9606 GN=ARID1A PE=1 SV=3	0.802899	2.63e-17	106.36	1	S	GQRTLLDPGRFSKVSSPAPMEGGEEEEELLG	X;X;X;X;X;X;X;X;X;X;X;X;X;X;X;Phospho (STY);X;X;X;X;X;X;X;X;X;X;X;X;X;X;X	XXXXXXXXXXXXXPPPPPPPPPPPPPPPPPP	VS(0.197)S(0.803)PAPMEGGEEEEELLGPK	3	3	0.75561			20242	20242	12622	20784	16390	10676	10463	8664.9
sp|O14545|TRAD1_HUMAN	327	sp|O14545|TRAD1_HUMAN	sp|O14545|TRAD1_HUMAN	>sp|O14545|TRAD1_HUMAN TRAF-type zinc finger domain-containing protein 1 OS=Homo sapiens OX=9606 GN=TRAFD1 PE=1 SV=1	0.878174	1.34e-08	104.01	1	S	CNPSRALPSLNTGSSSPRGVEEPDVIFQNFL	X;X;X;X;X;X;X;X;X;X;X;X;X;X;X;Phospho (STY);X;X;X;X;X;X;X;X;X;X;X;X;X;X;X	XXXXXPPPPPPPPPPPPPXXXXXXXXXXXXX	ALPSLNTGS(0.014)S(0.108)S(0.878)PR	11	3	0.060333			1174;1175;1176;1177;1178	1174	56286	83618	65368	45640	39541	35711
sp|O14545|TRAD1_HUMAN	415	sp|O14545|TRAD1_HUMAN	sp|O14545|TRAD1_HUMAN	>sp|O14545|TRAD1_HUMAN TRAF-type zinc finger domain-containing protein 1 OS=Homo sapiens OX=9606 GN=TRAFD1 PE=1 SV=1	0.961571	4.16e-14	97.685	1	S	VTEGIPRLDSQPQETSPELPRRRVRHQGDLS	X;X;X;X;X;X;X;X;X;X;X;X;X;X;X;Phospho (STY);X;X;X;X;X;X;X;X;X;X;X;X;X;X;X	XXXXXXXPPPPPPPPPPPPPPXXXXXXXXXX	LDSQPQET(0.038)S(0.962)PELPR	9	2	-0.059538			10224;10225;10226;10228	10226	60967	77347	63456	47146	44226	37046
sp|O14558|HSPB6_HUMAN	16	sp|O14558|HSPB6_HUMAN	sp|O14558|HSPB6_HUMAN	>sp|O14558|HSPB6_HUMAN Heat shock protein beta-6 OS=Homo sapiens OX=9606 GN=HSPB6 PE=1 SV=2	0.999999	1.92e-09	91.244	1	S	MEIPVPVQPSWLRRASAPLPGLSAPGRLFDQ	X;X;X;X;X;X;X;X;X;X;X;X;X;X;X;Phospho (STY);X;X;X;X;X;X;X;X;X;X;X;X;X;X;X	XXXXXXXXXXXXXPPPPPPPPPPPPPPXXXX	RAS(1)APLPGLSAPGR	3	3	-0.32278			13026;13027;13028;13029;13030;13031	13030	73940	92486	77161	58748	48630	49224
sp|O14617|AP3D1_HUMAN	658	sp|O14617|AP3D1_HUMAN	sp|O14617|AP3D1_HUMAN	>sp|O14617|AP3D1_HUMAN AP-3 complex subunit delta-1 OS=Homo sapiens OX=9606 GN=AP3D1 PE=1 SV=1	1	4.57e-12	111.3	1	S	AVFHEEEQRRPKHRPSEADEEELARRREARK	X;X;X;X;X;X;X;X;X;X;X;X;X;X;X;Phospho (STY);X;X;X;X;X;X;X;X;X;X;X;X;X;X;X	XXXXXXXXXXXXPPPPPPPPPPPPPXXXXXX	HRPS(1)EADEEELAR	4	3	1.3599			7588	7588	6480.3	9580.7	6696.3	3886.7	2663.4	2467.9
sp|O14617|AP3D1_HUMAN	632	sp|O14617|AP3D1_HUMAN	sp|O14617|AP3D1_HUMAN	>sp|O14617|AP3D1_HUMAN AP-3 complex subunit delta-1 OS=Homo sapiens OX=9606 GN=AP3D1 PE=1 SV=1	1	5.38e-15	83.661	2;3	S	VPEGLDLDAWINEPLSDSESEDERPRAVFHE	X;X;X;X;X;X;X;X;X;X;X;X;X;X;X;Phospho (STY);X;Phospho (STY);X;Phospho (STY);X;X;X;X;X;X;X;X;X;X;X	PPPPPPPPPPPPPPPPPPPPPPPPPPXXXXX	KVPVPEGLDLDAWINEPLS(1)DS(1)ES(1)EDERPR	19	5	0.33723			9954;9955;9956	9956	24609	33107	28835	18422	17922	14812
sp|O14617|AP3D1_HUMAN	634	sp|O14617|AP3D1_HUMAN	sp|O14617|AP3D1_HUMAN	>sp|O14617|AP3D1_HUMAN AP-3 complex subunit delta-1 OS=Homo sapiens OX=9606 GN=AP3D1 PE=1 SV=1	1	5.38e-15	83.661	2;3	S	EGLDLDAWINEPLSDSESEDERPRAVFHEEE	X;X;X;X;X;X;X;X;X;X;X;X;X;Phospho (STY);X;Phospho (STY);X;Phospho (STY);X;X;X;X;X;X;X;X;X;X;X;X;X	PPPPPPPPPPPPPPPPPPPPPPPPXXXXXXX	KVPVPEGLDLDAWINEPLS(1)DS(1)ES(1)EDERPR	21	5	0.33723			9954;9955;9956	9956	24609	33107	28835	18422	17922	14812
sp|O14617|AP3D1_HUMAN	636	sp|O14617|AP3D1_HUMAN	sp|O14617|AP3D1_HUMAN	>sp|O14617|AP3D1_HUMAN AP-3 complex subunit delta-1 OS=Homo sapiens OX=9606 GN=AP3D1 PE=1 SV=1	1	5.38e-15	83.661	3	S	LDLDAWINEPLSDSESEDERPRAVFHEEEQR	X;X;X;X;X;X;X;X;X;X;X;Phospho (STY);X;Phospho (STY);X;Phospho (STY);X;X;X;X;X;X;X;X;X;X;X;X;X;X;X	PPPPPPPPPPPPPPPPPPPPPPXXXXXXXXX	KVPVPEGLDLDAWINEPLS(1)DS(1)ES(1)EDERPR	23	5	0.33723			9955;9956	9956	21736	29388	24059	14842	15392	12233
sp|O14639|ABLM1_HUMAN	215	sp|O14639|ABLM1_HUMAN	sp|O14639|ABLM1_HUMAN	>sp|O14639|ABLM1_HUMAN Actin-binding LIM protein 1 OS=Homo sapiens OX=9606 GN=ABLIM1 PE=1 SV=3	0.459589	4.96e-06	66.862		S	NGRDCLCQLCAQPMSSSPKETTFSSNCAGCG	X;X;X;X;X;X;X;X;X;X;X;X;X;X;X;Phospho (STY);X;X;X;X;X;X;X;X;X;X;X;X;X;X;X	XXXPPPPPPPPPPPPPPPPXXXXXXXXXXXX	DCLCQLCAQPMS(0.081)S(0.46)S(0.46)PK	13	3	-0.76056				2461	0	0	0	0	0	0
sp|O14639|ABLM1_HUMAN	216	sp|O14639|ABLM1_HUMAN	sp|O14639|ABLM1_HUMAN	>sp|O14639|ABLM1_HUMAN Actin-binding LIM protein 1 OS=Homo sapiens OX=9606 GN=ABLIM1 PE=1 SV=3	0.668217	4.96e-06	66.862	1	S	GRDCLCQLCAQPMSSSPKETTFSSNCAGCGR	X;X;X;X;X;X;X;X;X;X;X;X;X;X;X;Phospho (STY);X;X;X;X;X;X;X;X;X;X;X;X;X;X;X	XXPPPPPPPPPPPPPPPPXXXXXXXXXXXXX	DCLCQLCAQPMS(0.022)S(0.31)S(0.668)PK	14	3	-1.6024			2460	2460	15807	21779	18367	12420	12030	12151
sp|O14639|ABLM1_HUMAN	422	sp|O14639|ABLM1_HUMAN	sp|O14639|ABLM1_HUMAN	>sp|O14639|ABLM1_HUMAN Actin-binding LIM protein 1 OS=Homo sapiens OX=9606 GN=ABLIM1 PE=1 SV=3	1	0.0132147	8.6641	1;2	S	EPFYTSGYDDKQERQSLGESPRTLSPTPSAE	X;X;X;X;X;X;X;X;X;X;X;X;X;X;X;Phospho (STY);X;X;X;Phospho (STY);X;X;Phospho (STY);X;Phospho (STY);X;Phospho (STY);X;Phospho (STY);X;X	XXXXXXXXXXXXXXPPPPPPPPXXXXXXXXX	QS(1)LGES(1)PR	2	2	0.2765			12841;12842	12842	45952	53296	40531	37592	33671	28031
sp|O14639|ABLM1_HUMAN	426	sp|O14639|ABLM1_HUMAN	sp|O14639|ABLM1_HUMAN	>sp|O14639|ABLM1_HUMAN Actin-binding LIM protein 1 OS=Homo sapiens OX=9606 GN=ABLIM1 PE=1 SV=3	1	0.00574772	16.481	1;2	S	TSGYDDKQERQSLGESPRTLSPTPSAEGYQD	X;X;X;X;X;X;X;X;X;X;X;Phospho (STY);X;X;X;Phospho (STY);X;X;Phospho (STY);X;Phospho (STY);X;Phospho (STY);X;Phospho (STY);X;X;X;X;X;X	XXXXXXXXXXPPPPPPPPXXXXXXXXXXXXX	QS(1)LGES(1)PR	6	2	0.2765			12837;12838;12839;12840;12842	12842	98747	92768	75757	70284	60730	52931
sp|O14639|ABLM1_HUMAN	586	sp|O14639|ABLM1_HUMAN	sp|O14639|ABLM1_HUMAN	>sp|O14639|ABLM1_HUMAN Actin-binding LIM protein 1 OS=Homo sapiens OX=9606 GN=ABLIM1 PE=1 SV=3	0.5	1.27e-06	77.16	1	S	GPPSFAVVGPDMKRRSSGREEDDEELLRRRQ	X;X;X;X;X;X;X;X;X;X;X;X;X;X;X;Phospho (STY);X;X;X;X;X;X;X;X;X;X;X;X;X;X;X	XXXXXXXXXXXXXXXPPPPPPPPPPPPPXXX	S(0.5)S(0.5)GREEDDEELLR	1	3	0.26992			17160	17160	13843	17373	13209	11703	9330.5	8314.2
sp|O14639|ABLM1_HUMAN	587	sp|O14639|ABLM1_HUMAN	sp|O14639|ABLM1_HUMAN	>sp|O14639|ABLM1_HUMAN Actin-binding LIM protein 1 OS=Homo sapiens OX=9606 GN=ABLIM1 PE=1 SV=3	0.998595	8.54e-20	64.798	1	S	PPSFAVVGPDMKRRSSGREEDDEELLRRRQL	X;X;X;X;X;X;X;X;X;X;X;X;X;X;X;Phospho (STY);X;X;X;X;X;X;X;X;X;X;X;X;X;X;X	XXXXXXXXXXXXXPPPPPPPPPPPPPPXXXX	RS(0.001)S(0.999)GREEDDEELLR	3	2	-0.26289			14408;14409;14410;14411;17160;17161;17162	14408	70582	73181	60898	60951	45052	39797
sp|O14639|ABLM1_HUMAN	452	sp|O14639|ABLM1_HUMAN	sp|O14639|ABLM1_HUMAN	>sp|O14639|ABLM1_HUMAN Actin-binding LIM protein 1 OS=Homo sapiens OX=9606 GN=ABLIM1 PE=1 SV=3	0.969851	5.62e-22	141.26	1;2	S	EGYQDVRDRMIHRSTSQGSINSPVYSRHSYT	X;X;X;X;X;X;X;X;X;X;X;X;X;X;X;Phospho (STY);X;X;Phospho (STY);X;X;X;X;X;X;X;X;X;X;X;X	XXXXXXXXXXXXXPPPPPPPPPPPPPPXXXX	S(0.022)T(0.009)S(0.97)QGS(0.996)INS(0.004)PVYSR	3	2	-0.5564			17700;17701;17702;17703;17704;17705;17706;17707;17708;17709;17710	17706	155210	203490	148340	116650	110290	94041
sp|O14639|ABLM1_HUMAN	455	sp|O14639|ABLM1_HUMAN	sp|O14639|ABLM1_HUMAN	>sp|O14639|ABLM1_HUMAN Actin-binding LIM protein 1 OS=Homo sapiens OX=9606 GN=ABLIM1 PE=1 SV=3	0.99871	3.4e-11	104.7	2	S	QDVRDRMIHRSTSQGSINSPVYSRHSYTPTT	X;X;X;X;X;X;X;X;X;X;X;X;Phospho (STY);X;X;Phospho (STY);X;X;X;X;X;X;X;X;X;X;X;X;X;X;X	XXXXXXXXXXPPPPPPPPPPPPPPXXXXXXX	S(0.15)T(0.15)S(0.702)QGS(0.999)INSPVYSR	6	3	0.4039			17706;17707;17708;17709;17710	17710	78051	133080	86797	68289	64713	50690
sp|O14639|ABLM1_HUMAN	655	sp|O14639|ABLM1_HUMAN	sp|O14639|ABLM1_HUMAN	>sp|O14639|ABLM1_HUMAN Actin-binding LIM protein 1 OS=Homo sapiens OX=9606 GN=ABLIM1 PE=1 SV=3	0.891225	0.00602258	48.47	1	S	SPINSASHIPSSKTASLPGYGRNGLHRPVST	X;X;X;X;X;X;X;X;X;X;X;X;X;X;X;Phospho (STY);X;X;X;X;X;X;X;X;X;X;X;X;X;X;X	XXXXXXXXXXXXXPPPPPPPPPXXXXXXXXX	T(0.109)AS(0.891)LPGYGR	3	2	0.46748			18043	18043	10830	10512	7429.7	5645.8	7096.7	5923.8
sp|O14639|ABLM1_HUMAN	431	sp|O14639|ABLM1_HUMAN	sp|O14639|ABLM1_HUMAN	>sp|O14639|ABLM1_HUMAN Actin-binding LIM protein 1 OS=Homo sapiens OX=9606 GN=ABLIM1 PE=1 SV=3	0.789131	3.65e-11	102.05	1;2	S	DKQERQSLGESPRTLSPTPSAEGYQDVRDRM	X;X;X;X;X;X;Phospho (STY);X;X;X;Phospho (STY);X;X;X;X;Phospho (STY);X;Phospho (STY);X;Phospho (STY);X;X;X;X;X;X;X;X;X;X;X	XXXXXXXXXXXXXPPPPPPPPPPPPPPPXXX	T(0.101)LS(0.789)PT(0.109)PS(0.001)AEGYQDVR	3	3	0.0059245			18546;18547;18548;18549;18550;18551	18546	102210	130510	97002	75902	77025	65713
sp|O14639|ABLM1_HUMAN	435	sp|O14639|ABLM1_HUMAN	sp|O14639|ABLM1_HUMAN	>sp|O14639|ABLM1_HUMAN Actin-binding LIM protein 1 OS=Homo sapiens OX=9606 GN=ABLIM1 PE=1 SV=3	0.941958	0.000161585	50.637	2	S	RQSLGESPRTLSPTPSAEGYQDVRDRMIHRS	X;X;Phospho (STY);X;X;X;Phospho (STY);X;X;X;X;Phospho (STY);X;X;X;Phospho (STY);X;X;X;X;X;X;X;X;X;X;X;X;X;X;X	XXXXXXXXXPPPPPPPPPPPPPPPXXXXXXX	T(0.038)LS(0.69)PT(0.329)PS(0.942)AEGYQDVR	7	3	-0.32028			18550;18551	18550	22231	29948	23950	18257	17641	15243
sp|O14639|ABLM1_HUMAN	352	sp|O14639|ABLM1_HUMAN	sp|O14639|ABLM1_HUMAN	>sp|O14639|ABLM1_HUMAN Actin-binding LIM protein 1 OS=Homo sapiens OX=9606 GN=ABLIM1 PE=1 SV=3	0.687909	0.0126984	29.796	1	S	KQSTKTEEKLRPTRTSSESIYSRPGSSIPGS	X;X;X;X;X;X;X;X;X;X;X;X;X;X;X;Phospho (STY);X;X;X;X;X;X;X;X;X;X;X;X;X;X;X	XXXXXXXXXXXXXXPPPPPPPPPXXXXXXXX	T(0.203)S(0.688)S(0.09)ES(0.019)IY(0.001)SR	2	2	-0.090748			19019	19019	14495	17188	13371	10557	8499.5	7355.8
sp|O14647|CHD2_HUMAN	1085	sp|O14647|CHD2_HUMAN	sp|O14647|CHD2_HUMAN	>sp|O14647|CHD2_HUMAN Chromodomain-helicase-DNA-binding protein 2 OS=Homo sapiens OX=9606 GN=CHD2 PE=1 SV=2	0.995429	2.04e-06	87.717	2	S	LPRIRSSTKKAQTNDSDSDTESKRQAQRSSA	X;X;X;X;X;X;X;X;X;X;X;X;X;X;X;Phospho (STY);X;Phospho (STY);X;X;X;X;X;X;X;X;X;X;X;X;X	XXXXXXXXXPPPPPPPPPPPPPPPXXXXXXX	AQT(0.002)NDS(0.995)DS(0.811)DT(0.185)ES(0.008)KR	6	3	0.61838			1617;1618;8424;8425;8426;8427;8428	1618	60452	123280	100800	43052	41378	40554
sp|O14647|CHD2_HUMAN	1087	sp|O14647|CHD2_HUMAN	sp|O14647|CHD2_HUMAN	>sp|O14647|CHD2_HUMAN Chromodomain-helicase-DNA-binding protein 2 OS=Homo sapiens OX=9606 GN=CHD2 PE=1 SV=2	0.973655	2.04e-06	87.717	2	S	RIRSSTKKAQTNDSDSDTESKRQAQRSSASE	X;X;X;X;X;X;X;X;X;X;X;X;X;Phospho (STY);X;Phospho (STY);X;X;X;X;X;X;X;X;X;X;X;X;X;X;X	XXXXXXXPPPPPPPPPPPPPPPXXXXXXXXX	KAQT(0.076)NDS(0.931)DS(0.974)DT(0.018)ES(0.002)KR	9	3	0.19216			1617;1618;8424;8425;8426;8427;8428	8428	60452	123280	100800	43052	41378	40554
sp|O14647|CHD2_HUMAN	207	sp|O14647|CHD2_HUMAN	sp|O14647|CHD2_HUMAN	>sp|O14647|CHD2_HUMAN Chromodomain-helicase-DNA-binding protein 2 OS=Homo sapiens OX=9606 GN=CHD2 PE=1 SV=2	1	4.89e-06	59.185	2	S	KKQPKTQRGKRKKQDSSDEDDDDDEAPKRQT	X;X;X;X;X;X;X;X;X;X;X;X;X;X;X;Phospho (STY);Phospho (STY);X;X;X;X;X;X;X;X;X;X;X;X;X;X	XXXXXXXXXXXPPPPPPPPPPPPPPPPPXXX	KKQDS(1)S(1)DEDDDDDEAPK	5	4	1.3019			9152	9152	9005.9	15735	12647	6248.4	5980.1	4559.9
sp|O14647|CHD2_HUMAN	208	sp|O14647|CHD2_HUMAN	sp|O14647|CHD2_HUMAN	>sp|O14647|CHD2_HUMAN Chromodomain-helicase-DNA-binding protein 2 OS=Homo sapiens OX=9606 GN=CHD2 PE=1 SV=2	1	4.89e-06	59.185	2	S	KQPKTQRGKRKKQDSSDEDDDDDEAPKRQTR	X;X;X;X;X;X;X;X;X;X;X;X;X;X;Phospho (STY);Phospho (STY);X;X;X;X;X;X;X;X;X;X;X;X;X;X;X	XXXXXXXXXXPPPPPPPPPPPPPPPPPXXXX	KKQDS(1)S(1)DEDDDDDEAPK	6	4	1.3019			9152	9152	9005.9	15735	12647	6248.4	5980.1	4559.9
sp|O14683|P5I11_HUMAN	14	sp|O14683|P5I11_HUMAN	sp|O14683|P5I11_HUMAN	>sp|O14683|P5I11_HUMAN Tumor protein p53-inducible protein 11 OS=Homo sapiens OX=9606 GN=TP53I11 PE=1 SV=2	0.998734	1.92e-06	85.891	1	S	__MAAKQPPPLMKKHSQTDLVSRLKTRKILG	X;X;X;X;X;X;X;X;X;X;X;X;X;X;X;Phospho (STY);X;X;X;X;X;X;X;X;X;X;X;X;X;X;X	XXXXXXXXXXXXXPPPPPPPPPPXXXXXXXX	KHS(0.999)QT(0.001)DLVSR	3	3	0.10707			9082;9083;9084;9085	9085	29297	94613	31861	22188	21460	18565
sp|O14686|KMT2D_HUMAN	4738	sp|O14686|KMT2D_HUMAN	sp|O14686|KMT2D_HUMAN	>sp|O14686|KMT2D_HUMAN Histone-lysine N-methyltransferase 2D OS=Homo sapiens OX=9606 GN=KMT2D PE=1 SV=2	1	0.000453926	58.564	1	S	PHLGSGRWEQEDRALSPVIPLIPRASIPVFP	X;X;X;X;X;X;X;X;X;X;X;X;X;X;X;Phospho (STY);X;X;X;X;X;X;X;X;X;X;X;X;X;X;X	XXXXXXXXXXXXXPPPPPPPPPPPXXXXXXX	ALS(1)PVIPLIPR	3	2	-0.6231			1213	1213	7103.9	9633.5	10015	5700.1	5015.4	3836.2
sp|O14686|KMT2D_HUMAN	1671	sp|O14686|KMT2D_HUMAN	sp|O14686|KMT2D_HUMAN	>sp|O14686|KMT2D_HUMAN Histone-lysine N-methyltransferase 2D OS=Homo sapiens OX=9606 GN=KMT2D PE=1 SV=2	1	3.39e-10	77.609	1	S	GVEHMECEIKLEGPVSPDVEPGKEETEESKK	X;X;X;X;X;X;X;X;X;X;X;X;X;X;X;Phospho (STY);X;X;X;X;X;X;X;X;X;X;X;X;X;X;X	XXXXXXXXXXPPPPPPPPPPPPPPPPPPPPX	LEGPVS(1)PDVEPGKEETEESK	6	4	1.2417			10311;10312;10313	10313	32260	55460	50373	25002	24605	22893
sp|O14686|KMT2D_HUMAN	2636	sp|O14686|KMT2D_HUMAN	sp|O14686|KMT2D_HUMAN	>sp|O14686|KMT2D_HUMAN Histone-lysine N-methyltransferase 2D OS=Homo sapiens OX=9606 GN=KMT2D PE=1 SV=2	0.528125	0.00609054	24.797	1	S	PDGSLPYLSHGASQRSGITSPVEKREDPGTG	X;X;X;X;X;X;X;X;X;X;X;X;X;X;X;Phospho (STY);X;X;X;X;X;X;X;X;X;X;X;X;X;X;X	XXXXXXXXXXXXXXXPPPPPPPPPXXXXXXX	S(0.528)GIT(0.26)S(0.212)PVEK	1	2	0.24113			15412	15412	17680	26470	24261	15068	14370	12302
sp|O14686|KMT2D_HUMAN	2640	sp|O14686|KMT2D_HUMAN	sp|O14686|KMT2D_HUMAN	>sp|O14686|KMT2D_HUMAN Histone-lysine N-methyltransferase 2D OS=Homo sapiens OX=9606 GN=KMT2D PE=1 SV=2	0.756035	0.0062045	29.596	1	S	LPYLSHGASQRSGITSPVEKREDPGTGMGSS	X;X;X;X;X;X;X;X;X;X;X;X;X;X;X;Phospho (STY);X;X;X;X;X;X;X;X;X;X;X;X;X;X;X	XXXXXXXXXXXPPPPPPPPPXXXXXXXXXXX	S(0.151)GIT(0.093)S(0.756)PVEK	5	2	1.0361			15411	15411	19172	27310	25779	16209	14059	13575
sp|O14737|PDCD5_HUMAN	119	sp|O14737|PDCD5_HUMAN	sp|O14737|PDCD5_HUMAN	>sp|O14737|PDCD5_HUMAN Programmed cell death protein 5 OS=Homo sapiens OX=9606 GN=PDCD5 PE=1 SV=3	0.999976	0.00315925	47.894	1	S	EKTTTVKFNRRKVMDSDEDDDY_________	X;X;X;X;X;X;X;X;X;X;X;X;X;Oxidation (M);X;Phospho (STY);X;X;X;X;X;X;X;X;X;X;X;X;X;X;X	XXXXXXXXXXXPPPPPPPPPPPXXXXXXXXX	VMDS(1)DEDDDY	4	2	1.0051			9947;9948;9949;19985;19986	19985	85727	121690	96124	66767	55413	52455
sp|O14745|NHRF1_HUMAN	280	sp|O14745|NHRF1_HUMAN	sp|O14745|NHRF1_HUMAN	>sp|O14745|NHRF1_HUMAN Na(+)/H(+) exchange regulatory cofactor NHE-RF1 OS=Homo sapiens OX=9606 GN=SLC9A3R1 PE=1 SV=4	1	4.61e-36	164.71	1	S	QKENSREALAEAALESPRPALVRSASSDTSE	X;X;X;X;X;X;X;X;X;X;X;X;X;X;X;Phospho (STY);X;X;X;X;X;X;X;X;X;Phospho (STY);Phospho (STY);X;Phospho (STY);X;X	XXXXXXPPPPPPPPPPPPPPPPPXXXXXXXX	EALAEAALES(1)PRPALVR	10	3	-1.0393			3449;3450;3451;3452	3452	74445	90646	148970	51087	57522	66966
sp|O14745|NHRF1_HUMAN	290	sp|O14745|NHRF1_HUMAN	sp|O14745|NHRF1_HUMAN	>sp|O14745|NHRF1_HUMAN Na(+)/H(+) exchange regulatory cofactor NHE-RF1 OS=Homo sapiens OX=9606 GN=SLC9A3R1 PE=1 SV=4	0.820282	5.93e-43	187.46	1;2	S	EAALESPRPALVRSASSDTSEELNSQDSPPK	X;X;X;X;X;Phospho (STY);X;X;X;X;X;X;X;X;X;Phospho (STY);X;X;Phospho (STY);X;X;X;X;X;X;X;X;X;X;X;X	XXXXXXXXXXXXXPPPPPPPPPPPPPPPPPP	S(0.151)AS(0.82)S(0.028)DTSEELNSQDSPPK	3	3	-0.48564			14883;14884;14885;14886;14888;14889;14891;14893	14884	104840	148420	170240	81106	70851	67458
sp|O14745|NHRF1_HUMAN	291	sp|O14745|NHRF1_HUMAN	sp|O14745|NHRF1_HUMAN	>sp|O14745|NHRF1_HUMAN Na(+)/H(+) exchange regulatory cofactor NHE-RF1 OS=Homo sapiens OX=9606 GN=SLC9A3R1 PE=1 SV=4	0.771633	1.49e-71	215.9	1	S	AALESPRPALVRSASSDTSEELNSQDSPPKQ	X;X;X;X;Phospho (STY);X;X;X;X;X;X;X;X;X;X;Phospho (STY);X;Phospho (STY);X;X;X;X;X;X;X;X;X;X;X;X;X	XXXXXXXXXXXXPPPPPPPPPPPPPPPPPPX	S(0.001)AS(0.09)S(0.772)DT(0.136)S(0.001)EELNSQDSPPK	4	2	-0.72372			14890	14890	9351.3	13010	19484	6550.2	6126.8	5526.5
sp|O14745|NHRF1_HUMAN	294	sp|O14745|NHRF1_HUMAN	sp|O14745|NHRF1_HUMAN	>sp|O14745|NHRF1_HUMAN Na(+)/H(+) exchange regulatory cofactor NHE-RF1 OS=Homo sapiens OX=9606 GN=SLC9A3R1 PE=1 SV=4	0.492268	7.84e-07	52.958		S	ESPRPALVRSASSDTSEELNSQDSPPKQDST	X;Phospho (STY);X;X;X;X;X;X;X;X;X;X;X;X;X;X;X;X;X;X;X;X;X;X;X;X;X;X;X;X;X	XXXXXXXXXXXXXXXXXXXXXXXXXXXXXXX	S(0.207)AS(0.589)S(0.219)DT(0.492)S(0.492)EELNSQDSPPK	7	3	-0.42403				14891	0	0	0	0	0	0
sp|O14791|APOL1_HUMAN	311	sp|O14791|APOL1_HUMAN	sp|O14791|APOL1_HUMAN	>sp|O14791|APOL1_HUMAN Apolipoprotein L1 OS=Homo sapiens OX=9606 GN=APOL1 PE=1 SV=5	0.999956	3.97e-16	116.01	1;2	S	VPHASASRPRVTEPISAESGEQVERVNEPSI	X;X;X;X;X;X;X;X;X;X;X;X;X;X;X;Phospho (STY);X;X;Phospho (STY);X;X;X;X;X;X;X;X;X;X;X;X	XXXXXXXXXXPPPPPPPPPPPPPPPXXXXXX	VTEPIS(1)AESGEQVER	6	3	1.0597			20301;20304;20305;20306;20307;20308	20301	64114	84575	71150	62058	51600	60071
sp|O14791|APOL1_HUMAN	314	sp|O14791|APOL1_HUMAN	sp|O14791|APOL1_HUMAN	>sp|O14791|APOL1_HUMAN Apolipoprotein L1 OS=Homo sapiens OX=9606 GN=APOL1 PE=1 SV=5	1	3.16e-22	127.41	1;2	S	ASASRPRVTEPISAESGEQVERVNEPSILEM	X;X;X;X;X;X;X;X;X;X;X;X;Phospho (STY);X;X;Phospho (STY);X;X;X;X;X;X;X;X;X;X;X;X;X;X;X	XXXXXXXPPPPPPPPPPPPPPPXXXXXXXXX	VTEPIS(1)AES(1)GEQVER	9	2	-1.1207			20298;20299;20300;20302;20303;20304;20305;20306;20307;20308	20304	118590	157070	126600	111720	100250	111920
sp|O14795|UN13B_HUMAN	254	sp|O14795|UN13B_HUMAN	sp|O14795|UN13B_HUMAN	>sp|O14795|UN13B_HUMAN Protein unc-13 homolog B OS=Homo sapiens OX=9606 GN=UNC13B PE=1 SV=2	0.498215	0.00222017	57.331		S	SMQSYDLDYPERRAISPTSSSRYGSSCNVSQ	X;X;X;X;X;X;X;X;X;X;X;X;X;X;X;Phospho (STY);X;X;X;X;X;X;X;X;X;X;X;X;X;X;X	XXXXXXXXXXXXXPPPPPPPPPXXXXXXXXX	AIS(0.498)PT(0.498)S(0.004)SSR	3	2	-0.040341				1017	0	0	0	0	0	0
sp|O14795|UN13B_HUMAN	359	sp|O14795|UN13B_HUMAN	sp|O14795|UN13B_HUMAN	>sp|O14795|UN13B_HUMAN Protein unc-13 homolog B OS=Homo sapiens OX=9606 GN=UNC13B PE=1 SV=2	0.999972	2.13e-09	77.229	1	S	PDLVLQKDHFLGPQESFPEENASSPFTQARA	X;X;X;X;X;X;X;X;X;X;X;X;X;X;X;Phospho (STY);X;X;X;X;X;X;X;X;X;X;X;X;X;X;X	XXXXXXXPPPPPPPPPPPPPPPPPPPPPPPX	DHFLGPQES(1)FPEENASSPFTQAR	9	3	0.69824			2661;2662	2662	13038	18451	16988	11584	10253	8924.6
sp|O14795|UN13B_HUMAN	176	sp|O14795|UN13B_HUMAN	sp|O14795|UN13B_HUMAN	>sp|O14795|UN13B_HUMAN Protein unc-13 homolog B OS=Homo sapiens OX=9606 GN=UNC13B PE=1 SV=2	0.998783	6.56e-07	58.319	1	S	EESQRKPLPTAAAQCSFEDPDSAVDDRDSDY	X;X;X;X;X;X;X;X;X;X;X;X;X;X;X;Phospho (STY);X;X;X;X;X;X;X;X;X;X;X;X;X;X;X	XXXXXPPPPPPPPPPPPPPPPPPPPPPPPPP	KPLPT(0.001)AAAQCS(0.999)FEDPDS(0.001)AVDDRDSDYR	11	5	0.06967			9451;9452;9453	9452	29700	47862	46522	22541	20811	21137
sp|O14828|SCAM3_HUMAN	32	sp|O14828|SCAM3_HUMAN	sp|O14828|SCAM3_HUMAN	>sp|O14828|SCAM3_HUMAN Secretory carrier-associated membrane protein 3 OS=Homo sapiens OX=9606 GN=SCAMP3 PE=1 SV=3	0.999996	1.89e-07	62.229	1	S	LDNPFQDPAVIQHRPSRQYATLDVYNPFETR	X;X;X;X;X;X;X;X;X;X;X;X;X;X;X;Phospho (STY);X;X;X;X;X;X;X;X;X;X;X;X;X;X;X	PPPPPPPPPPPPPPPPPXXXXXXXXXXXXXX	DGGNPFAEPSELDNPFQDPAVIQHRPS(1)R	27	4	0.5325			2614;2615	2614	14350	22569	18873	11072	10690	9729.6
sp|O14828|SCAM3_HUMAN	76	sp|O14828|SCAM3_HUMAN	sp|O14828|SCAM3_HUMAN	>sp|O14828|SCAM3_HUMAN Secretory carrier-associated membrane protein 3 OS=Homo sapiens OX=9606 GN=SCAMP3 PE=1 SV=3	0.936327	0.000956013	40.048	1	S	LPPPSAPSLQPSRKLSPTEPKNYGSYSTQAS	X;X;X;X;X;X;X;X;X;X;X;X;X;X;X;Phospho (STY);X;X;X;X;X;X;X;X;X;X;X;X;X;X;X	XXXXXXXXXXXXXPPPPPPPPXXXXXXXXXX	KLS(0.936)PT(0.064)EPK	3	3	0.10653			9304;9305;9306	9306	57704	111180	85078	41986	46190	38384
sp|O14874|BCKD_HUMAN	31	sp|O14874|BCKD_HUMAN	sp|O14874|BCKD_HUMAN	>sp|O14874|BCKD_HUMAN [3-methyl-2-oxobutanoate dehydrogenase [lipoamide]] kinase, mitochondrial OS=Homo sapiens OX=9606 GN=BCKDK PE=1 SV=2	0.688549	2.47e-05	60.132	1	S	PLRPLLGPALALRARSTSATDTHHVEMARER	X;X;X;X;X;X;X;X;X;X;X;X;X;X;X;Phospho (STY);X;X;X;X;X;X;X;X;X;X;X;X;X;X;X	XXXXXXXXXXXXXXXPPPPPPPPPPPPPPXX	S(0.689)T(0.23)S(0.078)AT(0.002)DT(0.001)HHVEMAR	1	3	-0.8375			17676	17676	8683.8	18566	15005	8061.7	7073.7	6282.5
sp|O14879|IFIT3_HUMAN	476	sp|O14879|IFIT3_HUMAN	sp|O14879|IFIT3_HUMAN	>sp|O14879|IFIT3_HUMAN Interferon-induced protein with tetratricopeptide repeats 3 OS=Homo sapiens OX=9606 GN=IFIT3 PE=1 SV=1	0.442616	5.03e-17	83.493		S	SELEDGSEEMGQGAVSSSPRELLSNSEQLN_	X;X;X;X;X;X;X;X;X;Oxidation (M);X;X;X;X;X;Phospho (STY);X;X;X;X;X;X;X;X;X;X;X;X;X;X;X	PPPPPPPPPPPPPPPPPPPPXXXXXXXXXXX	DAPSGIGSIFLSASELEDGSEEMGQGAVS(0.443)S(0.345)S(0.212)PR	29	3	-2.0314				2434	0	0	0	0	0	0
sp|O14879|IFIT3_HUMAN	477	sp|O14879|IFIT3_HUMAN	sp|O14879|IFIT3_HUMAN	>sp|O14879|IFIT3_HUMAN Interferon-induced protein with tetratricopeptide repeats 3 OS=Homo sapiens OX=9606 GN=IFIT3 PE=1 SV=1	0.50986	3.05e-23	99.984	1	S	ELEDGSEEMGQGAVSSSPRELLSNSEQLN__	X;X;X;X;X;X;X;X;X;X;X;X;X;X;X;Phospho (STY);X;X;X;X;X;X;X;X;X;X;X;X;X;X;X	PPPPPPPPPPPPPPPPPPPXXXXXXXXXXXX	DAPSGIGSIFLSASELEDGSEEMGQGAVS(0.188)S(0.51)S(0.302)PR	30	4	-0.82			2436	2436	4021	5661.8	4585.7	2934	2923	2304.6
sp|O14879|IFIT3_HUMAN	478	sp|O14879|IFIT3_HUMAN	sp|O14879|IFIT3_HUMAN	>sp|O14879|IFIT3_HUMAN Interferon-induced protein with tetratricopeptide repeats 3 OS=Homo sapiens OX=9606 GN=IFIT3 PE=1 SV=1	0.688488	2.2e-23	101.68	1	S	LEDGSEEMGQGAVSSSPRELLSNSEQLN___	X;X;X;X;X;X;X;X;X;X;X;X;X;X;X;Phospho (STY);X;X;X;X;X;X;X;X;X;X;X;X;X;X;X	PPPPPPPPPPPPPPPPPPXXXXXXXXXXXXX	DAPSGIGSIFLSASELEDGSEEMGQGAVS(0.093)S(0.218)S(0.688)PR	31	4	-0.56888			2435	2435	3722.2	5077.4	5663.3	3001.5	2689.9	2121.5
sp|O14924|RGS12_HUMAN	850	sp|O14924|RGS12_HUMAN	sp|O14924|RGS12_HUMAN	>sp|O14924|RGS12_HUMAN Regulator of G-protein signaling 12 OS=Homo sapiens OX=9606 GN=RGS12 PE=1 SV=1	0.805824	2.82e-05	61.802	1	S	EVEGRALPDSQQVPSSPASKHSLGSDHSSVS	X;X;X;X;X;X;X;X;X;X;X;X;X;X;X;Phospho (STY);X;X;X;X;X;X;X;X;X;X;X;X;X;X;X	XXXXXPPPPPPPPPPPPPPPXXXXXXXXXXX	ALPDSQQVPS(0.186)S(0.806)PAS(0.008)K	11	3	-0.21096			1170	1170	17092	25756	20827	13933	11884	11398
sp|P19105|ML12A_HUMAN;sp|O14950|ML12B_HUMAN;sp|P24844|MYL9_HUMAN	19;20;20	sp|P19105|ML12A_HUMAN	sp|P19105|ML12A_HUMAN	>sp|P19105|ML12A_HUMAN Myosin regulatory light chain 12A OS=Homo sapiens OX=9606 GN=MYL12A PE=1 SV=2;>sp|O14950|ML12B_HUMAN Myosin regulatory light chain 12B OS=Homo sapiens OX=9606 GN=MYL12B PE=1 SV=2;>sp|P24844|MYL9_HUMAN Myosin regulatory light polypept	1	6e-51	201.51	1;2	S	KRTKTKTKKRPQRATSNVFAMFDQSQIQEFK	X;X;X;X;X;X;X;X;X;X;X;X;X;X;Phospho (STY);Phospho (STY);X;X;X;X;Oxidation (M);X;X;X;X;X;X;X;X;X;X	XXXXXXXXXXXXXPPPPPPPPPPPPPPPPPP	AT(1)S(1)NVFAMFDQSQIQEFK	3	3	-0.35539			2123;2124;2125;2126;2127;2128;2131;2132;2133;2134;2135;2136;2137;2138;2139;2140;2141;2142	2142	1111300	589820	505540	285420	278660	215460
sp|O14974|MYPT1_HUMAN	445	sp|O14974|MYPT1_HUMAN	sp|O14974|MYPT1_HUMAN	>sp|O14974|MYPT1_HUMAN Protein phosphatase 1 regulatory subunit 12A OS=Homo sapiens OX=9606 GN=PPP1R12A PE=1 SV=1	0.816855	9.64e-12	105.69	1	S	DESPATWRLGLRKTGSYGALAEITASKEGQK	X;X;X;X;X;X;X;X;X;X;X;X;X;X;X;Phospho (STY);X;X;X;X;X;X;X;X;X;X;X;X;X;X;X	XXXXXXXXXXXXPPPPPPPPPPPPPPPXXXX	KT(0.18)GS(0.817)YGALAEIT(0.003)ASK	4	3	0.52839			9824;9825	9824	50485	77170	62624	30864	29343	30637
sp|O14974|MYPT1_HUMAN	507	sp|O14974|MYPT1_HUMAN	sp|O14974|MYPT1_HUMAN	>sp|O14974|MYPT1_HUMAN Protein phosphatase 1 regulatory subunit 12A OS=Homo sapiens OX=9606 GN=PPP1R12A PE=1 SV=1	0.909437	2.58e-07	89.177	1	S	TRLAYVAPTIPRRLASTSDIEEKENRDSSSL	X;X;X;X;X;X;X;X;X;X;X;X;X;X;X;Phospho (STY);X;X;X;X;X;X;X;X;X;X;X;X;X;X;X	XXXXXXXXXXXXPPPPPPPPPPPXXXXXXXX	RLAS(0.909)T(0.075)S(0.016)DIEEK	4	3	0.70467			13743;13744;13745	13745	53371	72776	76231	35408	30643	38460
sp|O14974|MYPT1_HUMAN	695	sp|O14974|MYPT1_HUMAN	sp|O14974|MYPT1_HUMAN	>sp|O14974|MYPT1_HUMAN Protein phosphatase 1 regulatory subunit 12A OS=Homo sapiens OX=9606 GN=PPP1R12A PE=1 SV=1	0.499871	5.98e-15	106.01		S	SQRKARSRQARQSRRSTQGVTLTDLQEAEKT	X;X;X;X;X;X;X;X;X;X;X;X;X;X;X;Phospho (STY);X;X;X;X;X;X;X;X;X;X;X;X;X;X;X	XXXXXXXXXXXXXXPPPPPPPPPPPPPPPPX	RS(0.5)T(0.5)QGVTLTDLQEAEK	2	3	-0.034865				14486	0	0	0	0	0	0
sp|O14974|MYPT1_HUMAN	912	sp|O14974|MYPT1_HUMAN	sp|O14974|MYPT1_HUMAN	>sp|O14974|MYPT1_HUMAN Protein phosphatase 1 regulatory subunit 12A OS=Homo sapiens OX=9606 GN=PPP1R12A PE=1 SV=1	0.507263	0.000220472	86.815	1	S	AGDRYDSLLGRSGSYSYLEERKPYSSRLEKD	X;X;X;X;X;X;X;X;X;X;X;X;X;X;X;Phospho (STY);X;X;X;X;X;X;X;X;X;X;X;X;X;X;X	XXXXXXXXXXXPPPPPPPPPPXXXXXXXXXX	S(0.306)GS(0.187)YS(0.507)YLEER	5	2	0.93698			15575	15575	24444	38393	24222	15683	14848	12209
sp|O14974|MYPT1_HUMAN	862	sp|O14974|MYPT1_HUMAN	sp|O14974|MYPT1_HUMAN	>sp|O14974|MYPT1_HUMAN Protein phosphatase 1 regulatory subunit 12A OS=Homo sapiens OX=9606 GN=PPP1R12A PE=1 SV=1	0.995293	2.33e-41	142.4	2	S	REKRRSTGVSFWTQDSDENEQEQQSDTEEGS	X;X;X;X;X;X;X;X;X;X;X;X;X;X;X;Phospho (STY);X;X;X;X;X;X;X;X;Phospho (STY);X;X;X;X;X;X	XXXXXPPPPPPPPPPPPPPPPPPPPPPPPPP	STGVSFWT(0.005)QDS(0.995)DENEQEQQS(0.971)DT(0.029)EEGSNKK	11	4	-0.24991			17639;17640	17640	33559	32736	20661	24036	19654	19085
sp|O14974|MYPT1_HUMAN	871	sp|O14974|MYPT1_HUMAN	sp|O14974|MYPT1_HUMAN	>sp|O14974|MYPT1_HUMAN Protein phosphatase 1 regulatory subunit 12A OS=Homo sapiens OX=9606 GN=PPP1R12A PE=1 SV=1	0.970618	7.28e-63	178.6	1;2	S	SFWTQDSDENEQEQQSDTEEGSNKKETQTDS	X;X;X;X;X;X;Phospho (STY);X;X;X;X;X;X;X;X;Phospho (STY);X;X;X;X;X;X;X;X;X;X;X;X;X;X;X	PPPPPPPPPPPPPPPPPPPPPPPPPXXXXXX	STGVSFWT(0.005)QDS(0.995)DENEQEQQS(0.971)DT(0.029)EEGSNKK	20	4	-0.24991			17635;17636;17637;17638;17639;17640	17640	81786	82384	54418	59865	45375	41874
sp|O14976|GAK_HUMAN	826	sp|O14976|GAK_HUMAN	sp|O14976|GAK_HUMAN	>sp|O14976|GAK_HUMAN Cyclin-G-associated kinase OS=Homo sapiens OX=9606 GN=GAK PE=1 SV=2	0.987463	1.35e-08	63.786	2	S	SSKESESALMEDRDESEVSDEGGSPISSEGQ	X;X;X;X;X;X;X;X;X;X;X;X;X;X;X;Phospho (STY);X;X;Phospho (STY);X;X;X;X;X;X;X;X;X;X;X;X	XXXPPPPPPPPPPPPPPPPPPPPPPPPPPPP	ESESALMEDRDES(0.987)EVS(0.806)DEGGS(0.183)PIS(0.018)S(0.006)EGQEPR	13	3	-0.19954			4798;4799	4798	4900.6	5921.5	5695.6	4275.2	3480.1	3786.2
sp|O14976|GAK_HUMAN	829	sp|O14976|GAK_HUMAN	sp|O14976|GAK_HUMAN	>sp|O14976|GAK_HUMAN Cyclin-G-associated kinase OS=Homo sapiens OX=9606 GN=GAK PE=1 SV=2	0.982625	3.02e-11	69.98	1;2	S	ESESALMEDRDESEVSDEGGSPISSEGQEPR	X;X;X;X;X;X;X;X;X;X;X;X;Phospho (STY);X;X;Phospho (STY);X;X;X;X;X;X;X;X;X;X;X;X;X;X;X	PPPPPPPPPPPPPPPPPPPPPPPPPPPPPPP	ESESALMEDRDES(0.983)EVS(0.983)DEGGS(0.026)PIS(0.006)S(0.003)EGQEPR	16	3	-0.04465			4796;4797;4798;4799	4799	12170	18716	17661	10802	10199	8877.5
sp|O14980|XPO1_HUMAN	391	sp|O14980|XPO1_HUMAN	sp|O14980|XPO1_HUMAN	>sp|O14980|XPO1_HUMAN Exportin-1 OS=Homo sapiens OX=9606 GN=XPO1 PE=1 SV=1	0.645979	0.000330548	39.225	1	S	LAAELYRESPFSTSASPLLSGSQHFDVPPRR	X;X;X;X;X;X;X;X;X;X;X;X;X;X;X;Phospho (STY);X;X;X;X;X;X;X;X;X;X;X;X;X;X;X	XXXXXXXPPPPPPPPPPPPPPPPPPPPPPPX	ESPFS(0.002)T(0.005)S(0.031)AS(0.646)PLLS(0.077)GS(0.238)QHFDVPPR	9	3	-2.3541			4878	4878	10514	16384	13869	9480.9	8676.7	7999.9
sp|O14980|XPO1_HUMAN	1055	sp|O14980|XPO1_HUMAN	sp|O14980|XPO1_HUMAN	>sp|O14980|XPO1_HUMAN Exportin-1 OS=Homo sapiens OX=9606 GN=XPO1 PE=1 SV=1	1	1.01e-12	94.844	1	S	IALRQADEEKHKRQMSVPGIFNPHEIPEEMC	X;X;X;X;X;X;X;X;X;X;X;X;X;X;X;Phospho (STY);X;X;X;X;X;X;X;X;X;X;X;X;X;X;X	XXXXXXXXXXXXXPPPPPPPPPPPPPPPPPP	QMS(1)VPGIFNPHEIPEEMCD	3	3	0.46997			12637;12638;12639	12639	13241	22841	17463	11690	11067	9969.8
sp|O15014|ZN609_HUMAN	576	sp|O15014|ZN609_HUMAN	sp|O15014|ZN609_HUMAN	>sp|O15014|ZN609_HUMAN Zinc finger protein 609 OS=Homo sapiens OX=9606 GN=ZNF609 PE=1 SV=2	0.999972	5.53e-05	69.313	2	S	PARSATPKVRLVEPHSPSPSSKFSTKGLCKK	X;X;X;X;X;X;X;X;X;X;X;X;X;X;X;Phospho (STY);X;Phospho (STY);X;X;X;X;X;X;X;X;X;X;X;X;X	XXXXXXXXXXPPPPPPPPPPPPXXXXXXXXX	LVEPHS(1)PS(0.988)PS(0.01)S(0.002)K	6	3	-0.098586			11275	11275	15741	25662	26576	12925	12436	13957
sp|O15014|ZN609_HUMAN	578	sp|O15014|ZN609_HUMAN	sp|O15014|ZN609_HUMAN	>sp|O15014|ZN609_HUMAN Zinc finger protein 609 OS=Homo sapiens OX=9606 GN=ZNF609 PE=1 SV=2	0.987966	5.53e-05	69.313	2	S	RSATPKVRLVEPHSPSPSSKFSTKGLCKKKL	X;X;X;X;X;X;X;X;X;X;X;X;X;Phospho (STY);X;Phospho (STY);X;X;X;X;X;X;X;X;X;X;X;X;X;X;X	XXXXXXXXPPPPPPPPPPPPXXXXXXXXXXX	LVEPHS(1)PS(0.988)PS(0.01)S(0.002)K	8	3	-0.098586			11275	11275	15741	25662	26576	12925	12436	13957
sp|O15018|PDZD2_HUMAN	1270	sp|O15018|PDZD2_HUMAN	sp|O15018|PDZD2_HUMAN	>sp|O15018|PDZD2_HUMAN PDZ domain-containing protein 2 OS=Homo sapiens OX=9606 GN=PDZD2 PE=1 SV=4	0.891101	0.000947517	41.249	1	S	DTGQVSRPENPSQPASPRVTKCKARSPVRLP	X;X;X;X;X;X;X;X;X;X;X;X;X;X;X;Phospho (STY);X;X;X;X;X;X;X;X;X;X;X;X;X;X;X	PPPPPPPPPPPPPPPPPPXXXXXXXXXXXXX	TSVDT(0.001)GQVS(0.003)RPENPS(0.105)QPAS(0.891)PR	19	3	1.122			19098;19099	19099	9228.5	13087	22717	7376.1	6727	7099.9
sp|O15027|SC16A_HUMAN	2081	sp|O15027|SC16A_HUMAN	sp|O15027|SC16A_HUMAN	>sp|O15027|SC16A_HUMAN Protein transport protein Sec16A OS=Homo sapiens OX=9606 GN=SEC16A PE=1 SV=4	0.564306	4.3e-05	48.658	1	S	PGWDRADSGPTQPPLSLSPAPETKRPGQAAK	X;X;X;X;X;X;X;X;X;X;X;X;X;X;X;Phospho (STY);X;X;X;X;X;X;X;X;X;X;X;X;X;X;X	XXXXXPPPPPPPPPPPPPPPPPPPXXXXXXX	ADS(0.001)GPT(0.007)QPPLS(0.564)LS(0.426)PAPET(0.002)K	11	4	-0.23159			464	464	7328.4	10892	10622	5537	5100.2	5003.4
sp|O15027|SC16A_HUMAN	2083	sp|O15027|SC16A_HUMAN	sp|O15027|SC16A_HUMAN	>sp|O15027|SC16A_HUMAN Protein transport protein Sec16A OS=Homo sapiens OX=9606 GN=SEC16A PE=1 SV=4	0.989501	2.31e-23	119.57	1	S	WDRADSGPTQPPLSLSPAPETKRPGQAAKKE	X;X;X;X;X;X;X;X;X;X;X;X;X;X;X;Phospho (STY);X;X;X;X;X;X;X;X;X;X;X;X;X;X;X	XXXPPPPPPPPPPPPPPPPPPPXXXXXXXXX	ADSGPTQPPLS(0.01)LS(0.99)PAPETK	13	3	0.015518			463;465;466;467	465	45573	75863	70833	35924	33264	34594
sp|O15027|SC16A_HUMAN	1069	sp|O15027|SC16A_HUMAN	sp|O15027|SC16A_HUMAN	>sp|O15027|SC16A_HUMAN Protein transport protein Sec16A OS=Homo sapiens OX=9606 GN=SEC16A PE=1 SV=4	1	0.000726243	41.284	1	S	LERAQQELVPPQQQASPPQLPKAMFSELSNP	X;X;X;X;X;X;X;X;X;X;X;X;X;X;X;Phospho (STY);X;X;X;X;X;X;X;X;X;X;X;X;X;X;X	XXXPPPPPPPPPPPPPPPPPPPXXXXXXXXX	AQQELVPPQQQAS(1)PPQLPK	13	4	-0.89432			1566;1567;1568	1568	22738	37388	31719	15408	16017	13044
sp|O15027|SC16A_HUMAN	1327	sp|O15027|SC16A_HUMAN	sp|O15027|SC16A_HUMAN	>sp|O15027|SC16A_HUMAN Protein transport protein Sec16A OS=Homo sapiens OX=9606 GN=SEC16A PE=1 SV=4	0.945941	3.14e-17	91.883	1	S	EKRDNNWRYDPRFTGSFDDDPDPHRDPYGEE	X;X;X;X;X;X;X;X;X;X;X;X;X;X;X;Phospho (STY);X;X;X;X;X;X;X;X;X;X;X;X;X;X;X	XXXXXXXXXXXXPPPPPPPPPPPPPPPPPPP	FT(0.054)GS(0.946)FDDDPDPHRDPYGEEVDRR	4	4	-0.27158			5562;5563;5564;5565	5563	31188	54700	40636	27189	23259	20476
sp|O15027|SC16A_HUMAN	1964	sp|O15027|SC16A_HUMAN	sp|O15027|SC16A_HUMAN	>sp|O15027|SC16A_HUMAN Protein transport protein Sec16A OS=Homo sapiens OX=9606 GN=SEC16A PE=1 SV=4	0.999981	5.8e-13	92.53	1	S	LLPSAPQTLPDGPLASPARVPMFPVPLPPGP	X;X;X;X;X;X;X;X;X;X;X;X;X;X;X;Phospho (STY);X;X;X;X;X;X;X;X;X;X;X;X;X;X;X	PPPPPPPPPPPPPPPPPPPXXXXXXXXXXXX	LLPSAPQTLPDGPLAS(1)PAR	16	3	-0.63351			10743;10744;10745	10743	18825	29766	25424	13266	13644	13034
sp|O15027|SC16A_HUMAN	569	sp|O15027|SC16A_HUMAN	sp|O15027|SC16A_HUMAN	>sp|O15027|SC16A_HUMAN Protein transport protein Sec16A OS=Homo sapiens OX=9606 GN=SEC16A PE=1 SV=4	0.862501	5.52e-18	114.33	1	S	PEDEASGSFFKQIDSSPVGGETDETTVSQNY	X;X;X;X;X;X;X;X;X;X;X;X;X;X;X;Phospho (STY);X;X;X;X;X;X;X;X;X;X;X;X;X;X;X	XXXXXXXXXXXPPPPPPPPPPPPPPPPPPPP	QIDS(0.137)S(0.863)PVGGETDETTVSQNYR	5	3	0.15717			12427;12428	12427	22888	34512	27169	18701	15188	12521
sp|O15037|KHNYN_HUMAN	10	sp|O15037|KHNYN_HUMAN	sp|O15037|KHNYN_HUMAN	>sp|O15037|KHNYN_HUMAN Protein KHNYN OS=Homo sapiens OX=9606 GN=KHNYN PE=1 SV=3	0.999986	1.75e-07	83.019	1	S	______MPTWGARPASPDRFAVSAEAENKVR	X;X;X;X;X;X;X;X;X;X;X;X;X;X;X;Phospho (STY);X;X;X;X;X;X;X;X;X;X;X;X;X;X;X	XXXXXXXXXXXXXPPPPPPPPPPPPPPPPXX	PAS(1)PDRFAVSAEAENK	3	3	-0.42411			12061	12061	21992	30958	26002	14806	13556	12539
sp|O15042|SR140_HUMAN	67	sp|O15042|SR140_HUMAN	sp|O15042|SR140_HUMAN	>sp|O15042|SR140_HUMAN U2 snRNP-associated SURP motif-containing protein OS=Homo sapiens OX=9606 GN=U2SURP PE=1 SV=2	0.999469	5.65e-07	65.632	1	S	KHNYRNESARESLCDSPHQNLSRPLLENKLK	X;X;X;X;X;X;X;X;X;X;X;X;X;X;X;Phospho (STY);X;X;X;X;X;X;X;X;X;X;X;X;X;X;X	XXXXXXXXXXPPPPPPPPPPPPPPPPPPPXX	ES(0.001)LCDS(0.999)PHQNLSR	6	3	-0.29187			4810;4811	4810	17751	40664	25413	14785	15110	12516
sp|O15042|SR140_HUMAN	946	sp|O15042|SR140_HUMAN	sp|O15042|SR140_HUMAN	>sp|O15042|SR140_HUMAN U2 snRNP-associated SURP motif-containing protein OS=Homo sapiens OX=9606 GN=U2SURP PE=1 SV=2	1	0.000976392	28.039	2	S	TSPSPSRSSSGRRVKSPSPKSERSERSERSH	X;X;X;X;X;X;X;X;X;X;X;X;X;X;X;Phospho (STY);X;Phospho (STY);X;X;X;X;X;X;X;X;X;X;X;X;X	XXXXXXXXXXXXPPPPPPPPXXXXXXXXXXX	VKS(1)PS(1)PK	3	2	0.095348			14628;14629;14630;14631;19896;19897;19898;19899;19900	19900	134060	236900	165320	93488	89925	78684
sp|O15042|SR140_HUMAN	948	sp|O15042|SR140_HUMAN	sp|O15042|SR140_HUMAN	>sp|O15042|SR140_HUMAN U2 snRNP-associated SURP motif-containing protein OS=Homo sapiens OX=9606 GN=U2SURP PE=1 SV=2	1	0.000976392	28.039	2	S	PSPSRSSSGRRVKSPSPKSERSERSERSHKE	X;X;X;X;X;X;X;X;X;X;X;X;X;Phospho (STY);X;Phospho (STY);X;X;X;X;X;X;X;X;X;X;X;X;X;X;X	XXXXXXXXXXPPPPPPPPXXXXXXXXXXXXX	VKS(1)PS(1)PK	5	2	0.095348			14628;14629;14630;14631;19896;19897;19898;19899;19900	19900	134060	236900	165320	93488	89925	78684
sp|O15047|SET1A_HUMAN	468	sp|O15047|SET1A_HUMAN	sp|O15047|SET1A_HUMAN	>sp|O15047|SET1A_HUMAN Histone-lysine N-methyltransferase SETD1A OS=Homo sapiens OX=9606 GN=SETD1A PE=1 SV=3	0.531196	5.29e-10	75.511	1	S	REEVRTSPRPASPARSGSPAPETTNESVPFA	X;X;X;X;X;X;X;X;X;X;X;X;X;X;X;Phospho (STY);X;X;X;X;X;X;X;X;X;X;X;X;X;X;X	XXXXXXXXXXXXXXXPPPPPPPPPPPPPPPP	S(0.531)GS(0.463)PAPET(0.003)T(0.003)NESVPFAQHSSLDSR	1	3	0.48925			15524	15524	5142	10931	10727	4553.9	4484.5	3613.5
sp|O15061|SYNEM_HUMAN	1044	sp|O15061|SYNEM_HUMAN	sp|O15061|SYNEM_HUMAN	>sp|O15061|SYNEM_HUMAN Synemin OS=Homo sapiens OX=9606 GN=SYNM PE=1 SV=2	0.902273	6.68e-10	58.179	1	S	KAVESVVRESLSRQRSPAPGSPDEEGGAEAP	X;X;X;X;X;X;X;X;X;X;X;X;X;X;X;Phospho (STY);X;X;X;X;X;X;X;X;X;X;X;X;X;X;X	XXXXXXXXXXXXXXXPPPPPPPPPPPPPPPP	S(0.902)PAPGS(0.098)PDEEGGAEAPAAGIR	1	2	0.19426			16380	16380	7418.5	9995.6	7309.4	6290.7	5029.1	4497.8
sp|O15061|SYNEM_HUMAN	1049	sp|O15061|SYNEM_HUMAN	sp|O15061|SYNEM_HUMAN	>sp|O15061|SYNEM_HUMAN Synemin OS=Homo sapiens OX=9606 GN=SYNM PE=1 SV=2	0.956189	2.36e-12	88.447	1	S	VVRESLSRQRSPAPGSPDEEGGAEAPAAGIR	X;X;X;X;X;X;X;X;X;X;X;X;X;X;X;Phospho (STY);X;X;X;X;X;X;X;X;X;X;X;X;X;X;X	XXXXXXXXXXPPPPPPPPPPPPPPPPPPPPP	S(0.044)PAPGS(0.956)PDEEGGAEAPAAGIR	6	2	0.17045			16379;16381;16382	16382	29183	44575	31502	24239	21082	18535
sp|O15061|SYNEM_HUMAN	1106	sp|O15061|SYNEM_HUMAN	sp|O15061|SYNEM_HUMAN	>sp|O15061|SYNEM_HUMAN Synemin OS=Homo sapiens OX=9606 GN=SYNM PE=1 SV=2	0.49094	1.11e-57	154.86		S	GQRTPQGPVSATVEVSSPTGFAQSQVLEDVS	X;X;X;X;X;X;X;X;X;X;X;X;X;X;X;Phospho (STY);X;X;X;X;X;X;X;X;X;X;X;X;X;X;X	XXXPPPPPPPPPPPPPPPPPPPPPPPPPPPP	TPQGPVSATVEVS(0.491)S(0.491)PT(0.018)GFAQSQVLEDVSQAAR	13	4	2.1062				18672	0	0	0	0	0	0
sp|O15061|SYNEM_HUMAN	1107	sp|O15061|SYNEM_HUMAN	sp|O15061|SYNEM_HUMAN	>sp|O15061|SYNEM_HUMAN Synemin OS=Homo sapiens OX=9606 GN=SYNM PE=1 SV=2	0.49094	1.11e-57	154.86		S	QRTPQGPVSATVEVSSPTGFAQSQVLEDVSQ	X;X;X;X;X;X;X;X;X;X;X;X;X;X;X;X;X;X;X;X;X;X;X;X;X;X;X;X;X;X;X	XXXXXXXXXXXXXXXXXXXXXXXXXXXXXXX	TPQGPVSATVEVS(0.491)S(0.491)PT(0.018)GFAQSQVLEDVSQAAR	14	4	2.1062				18672	0	0	0	0	0	0
sp|O15075|DCLK1_HUMAN	352	sp|O15075|DCLK1_HUMAN	sp|O15075|DCLK1_HUMAN	>sp|O15075|DCLK1_HUMAN Serine/threonine-protein kinase DCLK1 OS=Homo sapiens OX=9606 GN=DCLK1 PE=1 SV=2	0.761285	0.00012844	40.169	1;2	S	SPGSLRKQRSSQHGGSSTSLASTKVCSSMDE	X;X;X;X;X;X;X;X;X;X;X;X;X;X;X;Phospho (STY);X;X;Phospho (STY);X;X;X;X;X;X;X;X;Phospho (STY);X;X;X	XXXXXXXXXPPPPPPPPPPPPPPPXXXXXXX	S(0.001)S(0.001)QHGGS(0.761)S(0.216)T(0.015)S(0.004)LASTK	7	3	0.98215			17308;17309	17308	18080	37154	26883	13964	12877	12811
sp|O15075|DCLK1_HUMAN	355	sp|O15075|DCLK1_HUMAN	sp|O15075|DCLK1_HUMAN	>sp|O15075|DCLK1_HUMAN Serine/threonine-protein kinase DCLK1 OS=Homo sapiens OX=9606 GN=DCLK1 PE=1 SV=2	0.756647	0.00014809	52.994	2	S	SLRKQRSSQHGGSSTSLASTKVCSSMDENDG	X;X;X;X;X;X;X;X;X;X;X;X;Phospho (STY);X;X;Phospho (STY);X;X;X;X;X;X;X;X;Phospho (STY);X;X;X;X;X;X	XXXXXXPPPPPPPPPPPPPPPXXXXXXXXXX	S(0.004)S(0.004)QHGGS(0.758)S(0.234)T(0.234)S(0.757)LAS(0.008)T(0.002)K	10	3	-0.077987			17309	17309	10419	20512	13858	8189	7073.4	6661.2
sp|O15075|DCLK1_HUMAN	364	sp|O15075|DCLK1_HUMAN	sp|O15075|DCLK1_HUMAN	>sp|O15075|DCLK1_HUMAN Serine/threonine-protein kinase DCLK1 OS=Homo sapiens OX=9606 GN=DCLK1 PE=1 SV=2	0.802378	5.4e-15	88.306	1	S	HGGSSTSLASTKVCSSMDENDGPGEEVSEEG	X;X;X;Phospho (STY);X;X;Phospho (STY);X;X;X;X;X;X;X;X;Phospho (STY);X;X;X;X;X;X;X;X;X;X;X;X;X;X;X	XXXXXXXXXXXXPPPPPPPPPPPPPPPPPPP	VCS(0.198)S(0.802)MDENDGPGEEVSEEGFQIPATITER	4	3	-0.12137			19391	19391	3596.4	5619.4	4938.5	3431.4	2577.7	3182.3
sp|O15085|ARHGB_HUMAN	592	sp|O15085|ARHGB_HUMAN	sp|O15085|ARHGB_HUMAN	>sp|O15085|ARHGB_HUMAN Rho guanine nucleotide exchange factor 11 OS=Homo sapiens OX=9606 GN=ARHGEF11 PE=1 SV=1	0.876101	2.62e-10	92.531	1	S	QYDAPEPGTQRLSTGSFPEDLLESDSSRSEI	X;X;X;X;X;X;X;X;X;X;X;X;X;X;X;Phospho (STY);X;X;X;X;X;X;X;X;X;X;X;X;X;X;X	XXXXXXXXXXXPPPPPPPPPPPPPPPPPXXX	LS(0.017)T(0.107)GS(0.876)FPEDLLESDSSR	5	3	-2.2957			11189	11189	2686.8	4204.1	3609.8	2329.5	2188.9	1875.9
sp|O15085|ARHGB_HUMAN	35	sp|O15085|ARHGB_HUMAN	sp|O15085|ARHGB_HUMAN	>sp|O15085|ARHGB_HUMAN Rho guanine nucleotide exchange factor 11 OS=Homo sapiens OX=9606 GN=ARHGEF11 PE=1 SV=1	0.987465	1.25e-05	69.592	1	S	DSAPERKSPSHHRQPSDASETTGLVQRCVII	X;X;X;X;X;X;X;X;X;X;X;X;X;X;X;Phospho (STY);X;X;X;X;X;X;X;X;X;X;X;X;X;X;X	XXXXXXXXXXXXXPPPPPPPPPPPPPPXXXX	QPS(0.987)DAS(0.012)ETTGLVQR	3	3	-0.20219			12684	12684	12413	15977	13670	9276.6	8068.8	8027
sp|O15085|ARHGB_HUMAN	614	sp|O15085|ARHGB_HUMAN	sp|O15085|ARHGB_HUMAN	>sp|O15085|ARHGB_HUMAN Rho guanine nucleotide exchange factor 11 OS=Homo sapiens OX=9606 GN=ARHGEF11 PE=1 SV=1	0.990355	0.0468459	6.9734	1	S	ESDSSRSEIRLGRSESLKGREEMKRSRKAEN	X;X;X;X;X;X;X;X;X;X;X;X;X;X;X;Phospho (STY);X;X;X;X;X;X;X;X;X;X;X;X;X;X;X	XXXXXXXXXXXXXPPPPPPPXXXXXXXXXXX	S(0.01)ES(0.99)LKGR	3	2	0.063282			15231	15231	14600	20807	20383	9574.6	9040.1	7815.9
sp|O15085|ARHGB_HUMAN	1458	sp|O15085|ARHGB_HUMAN	sp|O15085|ARHGB_HUMAN	>sp|O15085|ARHGB_HUMAN Rho guanine nucleotide exchange factor 11 OS=Homo sapiens OX=9606 GN=ARHGEF11 PE=1 SV=1	0.77084	4.35e-08	56.528	1	S	ELAHRELLKSLGGESSGGTTPVGSFHTEAAR	X;X;X;X;X;X;X;X;X;X;X;X;X;X;X;Phospho (STY);X;X;X;X;X;X;X;X;X;X;X;X;X;X;X	XXXXXXXXXPPPPPPPPPPPPPPPPPPPPPP	S(0.002)LGGES(0.209)S(0.771)GGT(0.017)T(0.002)PVGSFHTEAAR	7	3	-1.4372			16022	16022	8452.9	12411	10351	6555.7	5419.3	5755.2
sp|O15085|ARHGB_HUMAN	633	sp|O15085|ARHGB_HUMAN	sp|O15085|ARHGB_HUMAN	>sp|O15085|ARHGB_HUMAN Rho guanine nucleotide exchange factor 11 OS=Homo sapiens OX=9606 GN=ARHGEF11 PE=1 SV=1	0.499998	0.000108884	57.727	1	S	REEMKRSRKAENVPRSRSDVDMDAAAEATRL	X;X;X;X;X;X;X;X;X;X;X;X;X;X;X;Phospho (STY);X;X;X;X;X;X;X;X;X;X;X;X;X;X;X	XXXXXXXXXXXXXXXPPPPPPPPPPPPPPPX	S(0.5)RS(0.5)DVDMDAAAEATR	1	3	-0.38451			16925;16926	16925	23994	32288	31797	22919	19205	19427
sp|O15085|ARHGB_HUMAN	635	sp|O15085|ARHGB_HUMAN	sp|O15085|ARHGB_HUMAN	>sp|O15085|ARHGB_HUMAN Rho guanine nucleotide exchange factor 11 OS=Homo sapiens OX=9606 GN=ARHGEF11 PE=1 SV=1	0.79954	3.47e-05	67.208	1	S	EMKRSRKAENVPRSRSDVDMDAAAEATRLHQ	X;X;X;X;X;X;X;X;X;X;X;X;X;X;X;Phospho (STY);X;X;X;X;X;X;X;X;X;X;X;X;X;X;X	XXXXXXXXXXXXXPPPPPPPPPPPPPPPXXX	S(0.2)RS(0.8)DVDMDAAAEATR	3	3	0.25156			16925;16926;16927	16927	33181	52060	44362	31746	27548	26021
sp|O15119|TBX3_HUMAN	371	sp|O15119|TBX3_HUMAN	sp|O15119|TBX3_HUMAN	>sp|O15119|TBX3_HUMAN T-box transcription factor TBX3 OS=Homo sapiens OX=9606 GN=TBX3 PE=1 SV=4	0.99982	6.66e-10	67.684	2	S	AASTVGTSNLKDLCPSEGESDAEAESKEEHG	X;X;X;X;X;X;X;X;X;X;X;X;X;X;X;Phospho (STY);X;X;X;Phospho (STY);X;X;X;X;X;X;X;X;X;X;X	XXXXXXXXXXXPPPPPPPPPPPPPPPPPPPP	DLCPS(1)EGES(0.997)DAEAES(0.004)KEEHGPEACDAAK	5	4	0.2007			2773	2773	6453.8	12276	7214.1	7114.1	6397.7	5254
sp|O15119|TBX3_HUMAN	375	sp|O15119|TBX3_HUMAN	sp|O15119|TBX3_HUMAN	>sp|O15119|TBX3_HUMAN T-box transcription factor TBX3 OS=Homo sapiens OX=9606 GN=TBX3 PE=1 SV=4	0.99662	6.66e-10	67.684	2	S	VGTSNLKDLCPSEGESDAEAESKEEHGPEAC	X;X;X;X;X;X;X;X;X;X;X;Phospho (STY);X;X;X;Phospho (STY);X;X;X;X;X;X;X;X;X;X;X;X;X;X;X	XXXXXXXPPPPPPPPPPPPPPPPPPPPPPPP	DLCPS(1)EGES(0.997)DAEAES(0.004)KEEHGPEACDAAK	9	4	0.2007			2773	2773	6453.8	12276	7214.1	7114.1	6397.7	5254
sp|O15127|SCAM2_HUMAN	319	sp|O15127|SCAM2_HUMAN	sp|O15127|SCAM2_HUMAN	>sp|O15127|SCAM2_HUMAN Secretory carrier-associated membrane protein 2 OS=Homo sapiens OX=9606 GN=SCAMP2 PE=1 SV=2	0.812382	1.11e-13	138.41	1	S	FSQGIFSSRTFHRAASSAAQGAFQGN_____	X;X;X;X;X;X;X;X;X;X;X;X;X;X;X;Phospho (STY);X;X;X;X;X;X;X;X;X;X;X;X;X;X;X	XXXXXXXXXXXXXPPPPPPPPPPPPPXXXXX	AAS(0.812)S(0.188)AAQGAFQGN	3	2	0.0089434			322;324	322	8055.7	5316.6	8856.6	3706.3	3832.2	2831.2
sp|O15127|SCAM2_HUMAN	320	sp|O15127|SCAM2_HUMAN	sp|O15127|SCAM2_HUMAN	>sp|O15127|SCAM2_HUMAN Secretory carrier-associated membrane protein 2 OS=Homo sapiens OX=9606 GN=SCAMP2 PE=1 SV=2	0.887891	1.14e-16	145.72	1	S	SQGIFSSRTFHRAASSAAQGAFQGN______	X;X;X;X;X;X;X;X;X;X;X;X;X;X;X;Phospho (STY);X;X;X;X;X;X;X;X;X;X;X;X;X;X;X	XXXXXXXXXXXXPPPPPPPPPPPPPXXXXXX	AAS(0.112)S(0.888)AAQGAFQGN	4	2	0.1371			323;325	323	13037	13832	19727	7126.4	8470.6	6813.9
sp|O15155|BET1_HUMAN	50	sp|O15155|BET1_HUMAN	sp|O15155|BET1_HUMAN	>sp|O15155|BET1_HUMAN BET1 homolog OS=Homo sapiens OX=9606 GN=BET1 PE=1 SV=1	0.890128	8.14e-06	98.148	1	S	LTESLRSKVTAIKSLSIEIGHEVKTQNKLLA	X;X;X;X;X;X;X;X;X;X;X;X;X;X;X;Phospho (STY);X;X;X;X;X;X;X;X;X;X;X;X;X;X;X	XXXXXXXXXXXXXPPPPPPPPPPPXXXXXXX	S(0.11)LS(0.89)IEIGHEVK	3	3	1.0823			16190;16191;16192	16192	25548	31744	61562	16708	18169	19576
sp|O15164|TIF1A_HUMAN	1042	sp|O15164|TIF1A_HUMAN	sp|O15164|TIF1A_HUMAN	>sp|O15164|TIF1A_HUMAN Transcription intermediary factor 1-alpha OS=Homo sapiens OX=9606 GN=TRIM24 PE=1 SV=3	1	0.00661182	11.811	1	S	DSDDDFVQPRKKRLKSIEERQLLK_______	X;Phospho (STY);X;X;X;X;X;X;X;X;X;X;X;X;X;Phospho (STY);X;X;X;X;X;X;X;X;X;X;X;X;X;X;X	XXXXXXXXXXXXXPPPPPPPXXXXXXXXXXX	LKS(1)IEER	3	3	-0.0069072			10608	10608	10091	25050	25759	8000.8	8101	7374.3
sp|O15164|TIF1A_HUMAN	1025	sp|O15164|TIF1A_HUMAN	sp|O15164|TIF1A_HUMAN	>sp|O15164|TIF1A_HUMAN Transcription intermediary factor 1-alpha OS=Homo sapiens OX=9606 GN=TRIM24 PE=1 SV=3	0.999999	1.29e-17	111.17	2	S	FPKPEFRNESEDNKFSDDSDDDFVQPRKKRL	X;X;X;X;X;X;X;X;X;X;X;X;X;X;X;Phospho (STY);X;X;Phospho (STY);X;X;X;X;X;X;X;X;X;X;X;X	XXXXXXXPPPPPPPPPPPPPPPPPPPPXXXX	NESEDNKFS(1)DDS(1)DDDFVQPR	9	3	-0.23479			11731	11731	10450	17919	16567	8967.4	7252.2	7107.5
sp|O15164|TIF1A_HUMAN	1028	sp|O15164|TIF1A_HUMAN	sp|O15164|TIF1A_HUMAN	>sp|O15164|TIF1A_HUMAN Transcription intermediary factor 1-alpha OS=Homo sapiens OX=9606 GN=TRIM24 PE=1 SV=3	1	1.29e-17	111.17	2	S	PEFRNESEDNKFSDDSDDDFVQPRKKRLKSI	X;X;X;X;X;X;X;X;X;X;X;X;Phospho (STY);X;X;Phospho (STY);X;X;X;X;X;X;X;X;X;X;X;X;X;Phospho (STY);X	XXXXPPPPPPPPPPPPPPPPPPPPXXXXXXX	NESEDNKFS(1)DDS(1)DDDFVQPR	12	3	-0.23479			11731	11731	10450	17919	16567	8967.4	7252.2	7107.5
sp|O15173|PGRC2_HUMAN	104	sp|O15173|PGRC2_HUMAN	sp|O15173|PGRC2_HUMAN	>sp|O15173|PGRC2_HUMAN Membrane-associated progesterone receptor component 2 OS=Homo sapiens OX=9606 GN=PGRMC2 PE=1 SV=1	1	0.00297575	55.596	1	S	ESPATSLPRMKKRDFSLEQLRQYDGSRNPRI	X;X;X;X;X;X;X;X;X;X;X;X;X;X;X;Phospho (STY);X;X;X;X;X;X;X;X;X;X;X;X;X;X;X	XXXXXXXXXXXXXPPPPPPPPXXXXXXXXXX	DFS(1)LEQLR	3	2	0.0025554			2574	2574	20227	31823	21825	12669	10350	7969.3
sp|O15211|RGL2_HUMAN	409	sp|O15211|RGL2_HUMAN	sp|O15211|RGL2_HUMAN	>sp|O15211|RGL2_HUMAN Ral guanine nucleotide dissociation stimulator-like 2 OS=Homo sapiens OX=9606 GN=RGL2 PE=1 SV=1	0.908934	0.00638761	30.886	1	S	YSQSRELLVQEVKLQSPLEPHSKKAPRSGSR	X;X;X;X;X;X;X;X;X;X;X;X;X;X;X;Phospho (STY);X;X;X;X;X;X;X;X;X;X;X;X;X;X;X	XXXXXXXXXXXXXPPPPPPPPPPXXXXXXXX	LQS(0.909)PLEPHS(0.091)K	3	3	-0.067027			10973	10973	11014	20850	19559	8422.6	9491.8	8663.6
sp|O15211|RGL2_HUMAN	619	sp|O15211|RGL2_HUMAN	sp|O15211|RGL2_HUMAN	>sp|O15211|RGL2_HUMAN Ral guanine nucleotide dissociation stimulator-like 2 OS=Homo sapiens OX=9606 GN=RGL2 PE=1 SV=1	0.725863	5.35e-17	82.316	1	S	PASSPRPSRGHRRSASCGSPLSGGAEEASGG	X;X;X;X;X;X;X;X;X;X;X;X;X;X;X;Phospho (STY);X;X;X;X;X;X;X;X;X;X;X;X;X;X;X	XXXXXXXXXXXXXPPPPPPPPPPPPPPPPPP	S(0.202)AS(0.726)CGS(0.071)PLS(0.001)GGAEEASGGTGYGGEGSGPGASDCR	3	3	-0.53132			14804;14805	14804	6245.3	9052.3	8893.5	5327.4	4428.1	4681.3
sp|O15231|ZN185_HUMAN	452	sp|O15231|ZN185_HUMAN	sp|O15231|ZN185_HUMAN	>sp|O15231|ZN185_HUMAN Zinc finger protein 185 OS=Homo sapiens OX=9606 GN=ZNF185 PE=1 SV=3	0.44136	1.27e-08	52.817		S	VPAQQPADPSTPERQSSPSGSEQLVRRESCG	X;X;X;X;X;X;X;X;X;X;Phospho (STY);X;X;X;X;Phospho (STY);X;X;X;X;X;X;X;X;X;X;X;X;Phospho (STY);X;X	PPPPPPPPPPPPPPPPPPPPPPPPPPXXXXX	GGQGDPAVPAQQPADPS(0.233)T(0.738)PERQS(0.441)S(0.377)PS(0.145)GS(0.066)EQLVR	23	4	0.36067				6079	0	0	0	0	0	0
sp|O15231|ZN185_HUMAN	453	sp|O15231|ZN185_HUMAN	sp|O15231|ZN185_HUMAN	>sp|O15231|ZN185_HUMAN Zinc finger protein 185 OS=Homo sapiens OX=9606 GN=ZNF185 PE=1 SV=3	0.841902	8.05e-06	76.628	1;2	S	PAQQPADPSTPERQSSPSGSEQLVRRESCGS	X;X;X;X;X;X;X;X;X;Phospho (STY);X;X;X;X;X;Phospho (STY);X;X;X;X;X;X;X;X;X;X;X;Phospho (STY);X;X;Phospho (STY)	PPPPPPPPPPPPPPPPPPPPPPPPPXXXXXX	QS(0.147)S(0.842)PS(0.01)GS(0.001)EQLVR	3	2	-0.16365			6080;12881	12881	18887	31717	22621	15778	13640	12507
sp|O15231|ZN185_HUMAN	512	sp|O15231|ZN185_HUMAN	sp|O15231|ZN185_HUMAN	>sp|O15231|ZN185_HUMAN Zinc finger protein 185 OS=Homo sapiens OX=9606 GN=ZNF185 PE=1 SV=3	0.474665	1.32e-08	47.95		S	GQGDPAVPTQQPADPSTPEQQNSPSGSEQFV	X;X;X;X;X;X;X;X;X;X;X;X;X;X;X;Phospho (STY);X;X;X;X;X;X;X;X;X;X;X;X;X;X;X	PPPPPPPPPPPPPPPPPPPPPPPPPPPPPPP	GGQGDPAVPT(0.05)QQPADPS(0.475)T(0.475)PEQQNSPSGSEQFVR	17	3	-0.51704				6084	0	0	0	0	0	0
sp|O15231|ZN185_HUMAN	465	sp|O15231|ZN185_HUMAN	sp|O15231|ZN185_HUMAN	>sp|O15231|ZN185_HUMAN Zinc finger protein 185 OS=Homo sapiens OX=9606 GN=ZNF185 PE=1 SV=3	0.998369	7.02e-16	129.98	1;2	S	RQSSPSGSEQLVRRESCGSSVLTDFEGKDVA	X;X;Phospho (STY);Phospho (STY);X;X;X;X;X;X;X;X;X;X;X;Phospho (STY);X;X;Phospho (STY);X;X;X;X;X;X;X;X;X;X;X;X	XXXXXXXXXXXXXPPPPPPPPPPPPPPPPPP	RES(0.998)CGS(0.002)SVLTDFEGK	3	4	0.16494			13295;13296;13297;13298;13300;13301;13302	13297	89767	162840	105690	78201	64622	56395
sp|O15231|ZN185_HUMAN	468	sp|O15231|ZN185_HUMAN	sp|O15231|ZN185_HUMAN	>sp|O15231|ZN185_HUMAN Zinc finger protein 185 OS=Homo sapiens OX=9606 GN=ZNF185 PE=1 SV=3	0.743753	2.17e-09	94.985	1;2	S	SPSGSEQLVRRESCGSSVLTDFEGKDVATKV	Phospho (STY);X;X;X;X;X;X;X;X;X;X;X;Phospho (STY);X;X;Phospho (STY);X;X;X;X;X;X;X;X;X;X;X;X;X;X;X	XXXXXXXXXXPPPPPPPPPPPPPPPXXXXXX	RES(0.963)CGS(0.744)S(0.283)VLT(0.01)DFEGK	6	3	0.59582			13299;13301	13301	28765	51130	29722	28295	21093	16842
sp|O15231|ZN185_HUMAN	152	sp|O15231|ZN185_HUMAN	sp|O15231|ZN185_HUMAN	>sp|O15231|ZN185_HUMAN Zinc finger protein 185 OS=Homo sapiens OX=9606 GN=ZNF185 PE=1 SV=3	0.859369	2.62e-69	188.49	1;2	S	TTEDYKKLAPYNIRRSSTSGDTEEEEEEEVV	X;X;X;X;X;X;X;X;X;X;X;X;X;X;X;Phospho (STY);X;X;X;X;X;Phospho (STY);X;X;X;X;X;X;X;X;X	XXXXXXXXXXXXXXPPPPPPPPPPPPPPPPP	RS(0.859)S(0.111)T(0.023)S(0.005)GDT(0.001)EEEEEEEVVPFSSDEQK	2	3	0.40312			14477;14479	14477	17831	23453	10090	13515	10579	9820.8
sp|O15231|ZN185_HUMAN	153	sp|O15231|ZN185_HUMAN	sp|O15231|ZN185_HUMAN	>sp|O15231|ZN185_HUMAN Zinc finger protein 185 OS=Homo sapiens OX=9606 GN=ZNF185 PE=1 SV=3	0.446544	2.62e-69	188.08		S	TEDYKKLAPYNIRRSSTSGDTEEEEEEEVVP	X;X;X;X;X;X;X;X;X;X;X;X;X;X;X;X;X;X;X;X;X;X;X;X;X;X;X;X;X;X;X	XXXXXXXXXXXXXXXXXXXXXXXXXXXXXXX	RS(0.447)S(0.447)T(0.19)S(0.33)GDT(0.587)EEEEEEEVVPFSSDEQK	3	3	0.15143				14480	0	0	0	0	0	0
sp|O15231|ZN185_HUMAN	155	sp|O15231|ZN185_HUMAN	sp|O15231|ZN185_HUMAN	>sp|O15231|ZN185_HUMAN Zinc finger protein 185 OS=Homo sapiens OX=9606 GN=ZNF185 PE=1 SV=3	0.293313	1.29e-20	104.91		S	DYKKLAPYNIRRSSTSGDTEEEEEEEVVPFS	X;X;X;X;X;X;X;X;X;X;X;X;X;X;X;X;X;X;X;X;X;X;X;X;X;X;X;X;X;X;X	XXXXXXXXXXXXXXXXXXXXXXXXXXXXXXX	RS(0.197)S(0.197)T(0.293)S(0.293)GDT(0.02)EEEEEEEVVPFSSDEQK	5	5	-0.9683				14476	0	0	0	0	0	0
sp|O15234|CASC3_HUMAN	148	sp|O15234|CASC3_HUMAN	sp|O15234|CASC3_HUMAN	>sp|O15234|CASC3_HUMAN Protein CASC3 OS=Homo sapiens OX=9606 GN=CASC3 PE=1 SV=2	0.999755	1.28e-59	179.54	1	S	EEKPDTKSTVTGERQSGDGQESTEPVENKVG	X;X;X;X;X;X;X;X;X;X;X;X;X;X;X;Phospho (STY);X;X;X;X;X;X;X;X;X;X;X;X;X;X;X	XXXXXXXPPPPPPPPPPPPPPPPPPPPPPXX	STVTGERQS(1)GDGQESTEPVENK	9	4	0.55525			12807;17733;17734;17735;17736	17734	56436	97735	80259	44105	42641	33114
sp|O15234|CASC3_HUMAN	66	sp|O15234|CASC3_HUMAN	sp|O15234|CASC3_HUMAN	>sp|O15234|CASC3_HUMAN Protein CASC3 OS=Homo sapiens OX=9606 GN=CASC3 PE=1 SV=2	1	0.00128664	44.412	1	S	QRGGRTGALHLRRVESGGAKSAEESECESED	X;X;X;X;X;X;X;X;X;X;X;X;X;X;X;Phospho (STY);X;X;X;X;X;X;X;X;X;X;X;X;X;X;X	XXXXXXXXXXXXPPPPPPPPXXXXXXXXXXX	RVES(1)GGAK	4	3	-0.080339			14610	14610	6650.3	16427	12964	6092.3	6556.3	4634.7
sp|O15258|RER1_HUMAN	95	sp|O15258|RER1_HUMAN	sp|O15258|RER1_HUMAN	>sp|O15258|RER1_HUMAN Protein RER1 OS=Homo sapiens OX=9606 GN=RER1 PE=1 SV=1	0.999974	3.02e-15	111.98	1	S	IAFLSPKVDPSLMEDSDDGPSLPTKQNEEFR	X;X;X;X;X;X;X;X;X;X;X;X;X;X;X;Phospho (STY);X;X;X;X;X;X;X;X;X;X;X;X;X;X;X	XXXXXXXPPPPPPPPPPPPPPPPPPXXXXXX	VDPSLMEDS(1)DDGPSLPTK	9	3	0.54857			19464;19465;19466	19465	38413	63068	48851	28854	27356	23114
sp|O15344|TRI18_HUMAN	96	sp|O15344|TRI18_HUMAN	sp|O15344|TRI18_HUMAN	>sp|O15344|TRI18_HUMAN E3 ubiquitin-protein ligase Midline-1 OS=Homo sapiens OX=9606 GN=MID1 PE=1 SV=1	0.669233	0.0175405	25.17	1	S	NIIDRFQKASVSGPNSPSETRRERAFDANTM	X;X;X;X;X;X;X;X;X;X;X;X;X;X;X;Phospho (STY);X;X;X;X;X;X;X;X;X;X;X;X;X;X;X	XXXXXXXXPPPPPPPPPPPPPXXXXXXXXXX	ASVS(0.006)GPNS(0.669)PS(0.285)ET(0.04)R	8	2	2.003			2035	2035	4360	6310.1	4969.1	2719.1	2455.8	2752.8
sp|O15379|HDAC3_HUMAN	424	sp|O15379|HDAC3_HUMAN	sp|O15379|HDAC3_HUMAN	>sp|O15379|HDAC3_HUMAN Histone deacetylase 3 OS=Homo sapiens OX=9606 GN=HDAC3 PE=1 SV=2	0.999994	1.99e-10	62.454	1	S	APNEFYDGDHDNDKESDVEI___________	X;X;X;X;X;X;X;X;X;X;X;X;X;X;X;Phospho (STY);X;X;X;X;X;X;X;X;X;X;X;X;X;X;X	PPPPPPPPPPPPPPPPPPPPXXXXXXXXXXX	GPEENYSRPEAPNEFYDGDHDNDKES(1)DVEI	26	4	-0.10502			6621;6622	6621	24281	34750	20568	18420	13744	13257
sp|O15400|STX7_HUMAN	125	sp|O15400|STX7_HUMAN	sp|O15400|STX7_HUMAN	>sp|O15400|STX7_HUMAN Syntaxin-7 OS=Homo sapiens OX=9606 GN=STX7 PE=1 SV=4	0.518208	0.00354455	30.853	2	S	QAAEREKEFVARVRASSRVSGSFPEDSSKER	X;X;X;X;X;X;X;X;X;X;X;X;X;X;X;Phospho (STY);X;X;X;Phospho (STY);X;X;X;X;X;X;X;X;X;X;X	XXXXXXXXXXXXXXPPPPPPPPPPPPPPPXX	AS(0.518)S(0.518)RVS(0.745)GS(0.218)FPEDS(0.001)SK	2	3	1.3118			1971	1971	17771	18443	17416	12712	16287	18029
sp|O15400|STX7_HUMAN	126	sp|O15400|STX7_HUMAN	sp|O15400|STX7_HUMAN	>sp|O15400|STX7_HUMAN Syntaxin-7 OS=Homo sapiens OX=9606 GN=STX7 PE=1 SV=4	0.51824	0.00354455	30.853	2	S	AAEREKEFVARVRASSRVSGSFPEDSSKERN	X;X;X;X;X;X;X;X;X;X;X;X;X;X;X;X;X;X;Phospho (STY);X;X;X;X;X;X;X;X;X;X;X;X	XXXXXXXXXXXXXXXXXXXXXXXXXXXXXXX	AS(0.518)S(0.518)RVS(0.745)GS(0.218)FPEDS(0.001)SK	3	3	1.3118			1971	1971	17771	18443	17416	12712	16287	18029
sp|O15400|STX7_HUMAN	129	sp|O15400|STX7_HUMAN	sp|O15400|STX7_HUMAN	>sp|O15400|STX7_HUMAN Syntaxin-7 OS=Homo sapiens OX=9606 GN=STX7 PE=1 SV=4	0.96712	5.38e-08	101.08	1;2	S	REKEFVARVRASSRVSGSFPEDSSKERNLVS	X;X;X;X;X;X;X;X;X;X;X;Phospho (STY);X;X;X;Phospho (STY);X;X;X;X;X;X;X;X;X;X;X;X;X;X;X	XXXXXXXXXXPPPPPPPPPPPPPPPXXXXXX	VS(0.967)GS(0.033)FPEDSSK	2	3	0.24831			1971;20208;20209;20210;20211	20209	87449	95842	86595	71288	84303	76288
sp|O15417|TNC18_HUMAN	1127	sp|O15417|TNC18_HUMAN	sp|O15417|TNC18_HUMAN	>sp|O15417|TNC18_HUMAN Trinucleotide repeat-containing gene 18 protein OS=Homo sapiens OX=9606 GN=TNRC18 PE=1 SV=3	0.999494	0.00236743	37.978	2	S	PDVPLPADGPERLALSPEDKPIRLSPSKITE	X;X;X;X;X;X;X;X;X;X;X;X;X;X;X;Phospho (STY);X;X;X;X;X;X;X;X;X;X;Phospho (STY);X;X;X;X	XXXXXXXXXXXXPPPPPPPPPPPPPPPPXXX	LALS(0.999)PEDKPIRLS(0.294)PS(0.706)K	4	4	-0.51865			10062	10062	8468.6	13164	13065	5665.2	6562.8	5299.3
sp|O15417|TNC18_HUMAN	1138	sp|O15417|TNC18_HUMAN	sp|O15417|TNC18_HUMAN	>sp|O15417|TNC18_HUMAN Trinucleotide repeat-containing gene 18 protein OS=Homo sapiens OX=9606 GN=TNRC18 PE=1 SV=3	0.706326	0.00236743	37.978	2	S	RLALSPEDKPIRLSPSKITEPLREGPEEEPL	X;X;X;X;Phospho (STY);X;X;X;X;X;X;X;X;X;X;Phospho (STY);X;X;X;X;X;X;X;X;X;X;X;X;X;X;X	XPPPPPPPPPPPPPPPPXXXXXXXXXXXXXX	LALS(0.999)PEDKPIRLS(0.294)PS(0.706)K	15	4	-0.51865			10062	10062	8468.6	13164	13065	5665.2	6562.8	5299.3
sp|O15427|MOT4_HUMAN	436	sp|O15427|MOT4_HUMAN	sp|O15427|MOT4_HUMAN	>sp|O15427|MOT4_HUMAN Monocarboxylate transporter 4 OS=Homo sapiens OX=9606 GN=SLC16A3 PE=1 SV=1	1	0.000792037	45.128	1	S	VAAAEEEKLHKPPADSGVDLREVEHFLKAEP	X;X;X;X;X;X;X;X;X;X;X;X;X;X;X;Phospho (STY);X;X;X;X;X;X;X;X;X;X;X;X;X;X;X	XXXXXXXXPPPPPPPPPPPPPXXXXXXXXXX	LHKPPADS(1)GVDLR	8	3	-1.6509			10521	10521	23729	35073	30994	15964	14863	13573
sp|O15438|MRP3_HUMAN	908	sp|O15438|MRP3_HUMAN	sp|O15438|MRP3_HUMAN	>sp|O15438|MRP3_HUMAN Canalicular multispecific organic anion transporter 2 OS=Homo sapiens OX=9606 GN=ABCC3 PE=1 SV=3	0.999998	4.8e-25	120.41	2	S	DPVTYVVQKQFMRQLSALSSDGEGQGRPVPR	X;X;X;X;X;X;X;X;X;X;X;X;X;X;X;Phospho (STY);X;X;Phospho (STY);X;X;X;X;X;X;X;X;X;X;X;X	XXXXXXXXXXXXXPPPPPPPPPPPPPPPPPP	QLS(1)ALS(0.992)S(0.008)DGEGQGRPVPR	3	3	-0.13192			12584;12585;12586;12588	12586	57030	106430	103240	42529	40332	38762
sp|O15438|MRP3_HUMAN	911	sp|O15438|MRP3_HUMAN	sp|O15438|MRP3_HUMAN	>sp|O15438|MRP3_HUMAN Canalicular multispecific organic anion transporter 2 OS=Homo sapiens OX=9606 GN=ABCC3 PE=1 SV=3	0.99801	7.54e-32	145.87	1;2	S	TYVVQKQFMRQLSALSSDGEGQGRPVPRRHL	X;X;X;X;X;X;X;X;X;X;X;X;Phospho (STY);X;X;Phospho (STY);Phospho (STY);X;X;X;X;X;X;X;X;X;X;X;X;X;X	XXXXXXXXXXPPPPPPPPPPPPPPPPPPXXX	QLS(0.002)ALS(0.998)S(1)DGEGQGRPVPR	6	3	0.79004			12584;12585;12586;12587;12588;12589;12590;12591	12590	98707	174740	173240	73053	63422	67650
sp|O15438|MRP3_HUMAN	912	sp|O15438|MRP3_HUMAN	sp|O15438|MRP3_HUMAN	>sp|O15438|MRP3_HUMAN Canalicular multispecific organic anion transporter 2 OS=Homo sapiens OX=9606 GN=ABCC3 PE=1 SV=3	0.999777	8.37e-08	80.511	1;2	S	YVVQKQFMRQLSALSSDGEGQGRPVPRRHLG	X;X;X;X;X;X;X;X;X;X;X;X;X;X;Phospho (STY);Phospho (STY);X;X;X;X;X;X;X;X;X;X;X;X;X;X;X	XXXXXXXXXPPPPPPPPPPPPPPPPPPXXXX	QLS(0.002)ALS(0.998)S(1)DGEGQGRPVPR	7	3	0.79004			12587;12589;12590;12592	12590	41689	64019	60035	32954	23676	29534
sp|Q6A1A2|PDPK2_HUMAN;sp|O15530|PDPK1_HUMAN	214;241	sp|Q6A1A2|PDPK2_HUMAN	sp|Q6A1A2|PDPK2_HUMAN	>sp|Q6A1A2|PDPK2_HUMAN Putative 3-phosphoinositide-dependent protein kinase 2 OS=Homo sapiens OX=9606 GN=PDPK2P PE=5 SV=1;>sp|O15530|PDPK1_HUMAN 3-phosphoinositide-dependent protein kinase 1 OS=Homo sapiens OX=9606 GN=PDPK1 PE=1 SV=1	0.998273	4.8e-44	165.19	1	S	TAKVLSPESKQARANSFVGTAQYVSPELLTE	X;X;X;X;X;X;X;X;X;X;X;X;X;X;X;Phospho (STY);X;X;X;X;X;X;X;X;X;X;X;X;X;X;X	XXXXXXXXXXXXXPPPPPPPPPPPPPPPPPP	ANS(0.998)FVGT(0.002)AQYVSPELLTEK	3	4	0.089632			1326;1327;1328;1329;1330;1331	1331	60930	79327	67376	40093	43440	41730
sp|O15541|R113A_HUMAN	84	sp|O15541|R113A_HUMAN	sp|O15541|R113A_HUMAN	>sp|O15541|R113A_HUMAN E3 ubiquitin-protein ligase RNF113A OS=Homo sapiens OX=9606 GN=RNF113A PE=1 SV=1	0.999999	3.87e-14	88.765	2	S	KTRDSGKQKAAYGDLSSEEEEENEPESLGVV	X;X;X;X;X;X;X;X;X;X;X;X;X;X;X;Phospho (STY);Phospho (STY);X;X;X;X;X;X;X;X;X;X;X;X;X;X	XXXXXXXXXPPPPPPPPPPPPPPPPPPPPPP	AAYGDLS(1)S(1)EEEEENEPESLGVVYK	7	4	1.7429			385;386	386	11880	16475	11060	8048.1	7196.9	7674.5
sp|O15541|R113A_HUMAN	85	sp|O15541|R113A_HUMAN	sp|O15541|R113A_HUMAN	>sp|O15541|R113A_HUMAN E3 ubiquitin-protein ligase RNF113A OS=Homo sapiens OX=9606 GN=RNF113A PE=1 SV=1	0.999999	3.87e-14	88.765	2	S	TRDSGKQKAAYGDLSSEEEEENEPESLGVVY	X;X;X;X;X;X;X;X;X;X;X;X;X;X;Phospho (STY);Phospho (STY);X;X;X;X;X;X;X;X;X;X;X;X;X;X;X	XXXXXXXXPPPPPPPPPPPPPPPPPPPPPPP	AAYGDLS(1)S(1)EEEEENEPESLGVVYK	8	4	1.7429			385;386	386	11880	16475	11060	8048.1	7196.9	7674.5
sp|O15541|R113A_HUMAN	253	sp|O15541|R113A_HUMAN	sp|O15541|R113A_HUMAN	>sp|O15541|R113A_HUMAN E3 ubiquitin-protein ligase RNF113A OS=Homo sapiens OX=9606 GN=RNF113A PE=1 SV=1	0.999953	9.08e-14	99.147	1	S	EGRYGVYEDENYEVGSDDEEIPFKCFICRQS	X;X;X;X;X;X;X;X;X;X;X;X;X;X;X;Phospho (STY);X;X;X;X;X;X;X;X;X;X;X;X;X;X;X	XXXPPPPPPPPPPPPPPPPPPPPPXXXXXXX	YGVYEDENYEVGS(1)DDEEIPFK	13	3	0.65817			20574;20575;20576;20577;20578;20579	20576	60907	91016	51679	48333	44815	36591
sp|O15551|CLD3_HUMAN	203	sp|O15551|CLD3_HUMAN	sp|O15551|CLD3_HUMAN	>sp|O15551|CLD3_HUMAN Claudin-3 OS=Homo sapiens OX=9606 GN=CLDN3 PE=1 SV=1	0.970471	1.15e-10	81.628	1;2;3	S	EKKYTATKVVYSAPRSTGPGASLGTGYDRKD	X;X;X;X;X;X;X;X;X;X;X;Phospho (STY);X;X;X;Phospho (STY);X;X;X;X;X;Phospho (STY);X;X;X;X;X;X;X;X;X	XXXXXXXXPPPPPPPPPPPPPPPPPPPPPXX	S(0.97)T(0.03)GPGASLGTGYDR	1	2	-0.0017816			17631;20397;20398	17631	29553	68913	52236	23757	22452	21828
sp|O15551|CLD3_HUMAN	209	sp|O15551|CLD3_HUMAN	sp|O15551|CLD3_HUMAN	>sp|O15551|CLD3_HUMAN Claudin-3 OS=Homo sapiens OX=9606 GN=CLDN3 PE=1 SV=1	0.881165	0.00140767	38.688	3	S	TKVVYSAPRSTGPGASLGTGYDRKDYV____	X;X;X;X;X;Phospho (STY);X;X;X;Phospho (STY);X;X;X;X;X;Phospho (STY);X;X;X;X;X;X;X;X;X;X;X;X;X;X;X	XXPPPPPPPPPPPPPPPPPPPPPXXXXXXXX	VVY(0.005)S(0.995)APRS(0.884)T(0.128)GPGAS(0.881)LGT(0.107)GY(0.001)DR	14	3	-0.089695			20398	20398	6742.6	14673	12124	5757	5809.4	5751.6
sp|O15551|CLD3_HUMAN	199	sp|O15551|CLD3_HUMAN	sp|O15551|CLD3_HUMAN	>sp|O15551|CLD3_HUMAN Claudin-3 OS=Homo sapiens OX=9606 GN=CLDN3 PE=1 SV=1	0.999999	2.56e-10	40.681	1;2;3	S	CPPREKKYTATKVVYSAPRSTGPGASLGTGY	X;X;X;X;X;X;X;X;X;X;X;X;X;X;X;Phospho (STY);X;X;X;Phospho (STY);X;X;X;X;X;Phospho (STY);X;X;X;X;X	XXXXXXXXXXXXPPPPPPPPPPPPPPPPPPP	VVYS(1)APR	4	2	0.19632			20394;20395;20396;20397;20398	20396	53256	149960	126290	38259	36562	34787
sp|O43149|ZZEF1_HUMAN	2443	sp|O43149|ZZEF1_HUMAN	sp|O43149|ZZEF1_HUMAN	>sp|O43149|ZZEF1_HUMAN Zinc finger ZZ-type and EF-hand domain-containing protein 1 OS=Homo sapiens OX=9606 GN=ZZEF1 PE=1 SV=6	0.5	0.00188047	32.937	1	S	LDERGDREEEVERPVSSPGDPEQKKLDPLEG	X;X;X;X;X;X;X;X;X;X;X;X;X;X;X;Phospho (STY);X;X;X;X;X;X;X;X;X;X;X;X;X;X;X	XXXXPPPPPPPPPPPPPPPPPPPPXXXXXXX	GDREEEVERPVS(0.5)S(0.5)PGDPEQK	12	3	0.68281			5793	5793	5115.3	6625.3	6666.7	4070.4	3401.1	3731.1
sp|O43149|ZZEF1_HUMAN	2444	sp|O43149|ZZEF1_HUMAN	sp|O43149|ZZEF1_HUMAN	>sp|O43149|ZZEF1_HUMAN Zinc finger ZZ-type and EF-hand domain-containing protein 1 OS=Homo sapiens OX=9606 GN=ZZEF1 PE=1 SV=6	0.812972	3.79e-08	65.151	1	S	DERGDREEEVERPVSSPGDPEQKKLDPLEGL	X;X;X;X;X;X;X;X;X;X;X;X;X;X;X;Phospho (STY);X;X;X;X;X;X;X;X;X;X;X;X;X;X;X	XXXPPPPPPPPPPPPPPPPPPPPXXXXXXXX	GDREEEVERPVS(0.187)S(0.813)PGDPEQK	13	4	0.56219			5792;5793	5792	18068	25555	22247	14592	12820	13303
sp|O43149|ZZEF1_HUMAN	1518	sp|O43149|ZZEF1_HUMAN	sp|O43149|ZZEF1_HUMAN	>sp|O43149|ZZEF1_HUMAN Zinc finger ZZ-type and EF-hand domain-containing protein 1 OS=Homo sapiens OX=9606 GN=ZZEF1 PE=1 SV=6	0.689748	6.74e-10	60.583	1	S	LPAADVSPATAEEPLSPSTPTRRPPFTRGRL	X;X;X;X;X;X;X;X;X;X;X;X;X;X;X;Phospho (STY);X;X;X;X;X;X;X;X;X;X;X;X;X;X;X	PPPPPPPPPPPPPPPPPPPPPPXXXXXXXXX	LPSSSGLPAADVSPATAEEPLS(0.69)PS(0.217)T(0.07)PT(0.023)R	22	4	-0.87648			10918;10919	10919	14889	20257	15532	11640	10724	9809.6
sp|O43149|ZZEF1_HUMAN	984	sp|O43149|ZZEF1_HUMAN	sp|O43149|ZZEF1_HUMAN	>sp|O43149|ZZEF1_HUMAN Zinc finger ZZ-type and EF-hand domain-containing protein 1 OS=Homo sapiens OX=9606 GN=ZZEF1 PE=1 SV=6	0.996525	0.0130394	29.15	1	S	GSLLSWCYLQLKSTDSGAKDLAVDLIEKYVG	X;X;X;X;X;X;X;X;X;X;X;X;X;X;X;Phospho (STY);X;X;X;X;X;X;X;X;X;X;X;X;X;X;X	XXXXXXXXXXXXPPPPPPPXXXXXXXXXXXX	ST(0.003)DS(0.997)GAK	4	2	0.70571			17609;17610;17611	17611	21389	64641	50683	22414	26231	13536
sp|O43150|ASAP2_HUMAN	701	sp|O43150|ASAP2_HUMAN	sp|O43150|ASAP2_HUMAN	>sp|O43150|ASAP2_HUMAN Arf-GAP with SH3 domain, ANK repeat and PH domain-containing protein 2 OS=Homo sapiens OX=9606 GN=ASAP2 PE=1 SV=3	1	7.37e-61	196.51	1	S	HVEYEWRLLHEDLDESDDDMDEKLQPSPNRR	X;X;X;X;X;X;X;X;X;X;X;X;X;X;X;Phospho (STY);X;X;X;Oxidation (M);X;X;X;X;X;X;X;X;X;X;X	XXXXXXXPPPPPPPPPPPPPPPPXXXXXXXX	LLHEDLDES(1)DDDMDEK	9	3	2.2146			10692;10693;10694;10695;10696;10697	10697	114490	140850	126140	89612	70575	65202
sp|O43150|ASAP2_HUMAN	820	sp|O43150|ASAP2_HUMAN	sp|O43150|ASAP2_HUMAN	>sp|O43150|ASAP2_HUMAN Arf-GAP with SH3 domain, ANK repeat and PH domain-containing protein 2 OS=Homo sapiens OX=9606 GN=ASAP2 PE=1 SV=3	0.354586	5.46e-06	64.882		S	WKTNSVSVDGGSRQRSSSDPPAVHPPLPPLR	X;X;X;X;X;X;X;X;X;X;X;X;X;X;X;Phospho (STY);X;X;X;X;X;X;X;X;X;X;X;X;X;X;X	XXXXXXXXXXXXXXXPPPPPPPPPPPPPPPP	S(0.355)S(0.355)S(0.291)DPPAVHPPLPPLR	1	3	0.23018				17353	0	0	0	0	0	0
sp|O43150|ASAP2_HUMAN	821	sp|O43150|ASAP2_HUMAN	sp|O43150|ASAP2_HUMAN	>sp|O43150|ASAP2_HUMAN Arf-GAP with SH3 domain, ANK repeat and PH domain-containing protein 2 OS=Homo sapiens OX=9606 GN=ASAP2 PE=1 SV=3	0.354586	5.46e-06	64.882		S	KTNSVSVDGGSRQRSSSDPPAVHPPLPPLRV	X;X;X;X;X;X;X;X;X;X;X;X;X;X;X;X;X;X;X;X;X;X;X;X;X;X;X;X;X;X;X	XXXXXXXXXXXXXXXXXXXXXXXXXXXXXXX	S(0.355)S(0.355)S(0.291)DPPAVHPPLPPLR	2	3	0.23018				17353	0	0	0	0	0	0
sp|O43159|RRP8_HUMAN	62	sp|O43159|RRP8_HUMAN	sp|O43159|RRP8_HUMAN	>sp|O43159|RRP8_HUMAN Ribosomal RNA-processing protein 8 OS=Homo sapiens OX=9606 GN=RRP8 PE=1 SV=2	0.999997	7.16e-46	157.94	2	S	LEAASLSQHPPSLCISDSEEEEEERKKKCPK	X;X;X;X;X;X;X;X;X;X;X;X;X;X;X;Phospho (STY);X;Phospho (STY);X;X;X;X;X;X;X;X;X;X;X;X;X	PPPPPPPPPPPPPPPPPPPPPPPPPXXXXXX	ALEAASLSQHPPSLCIS(1)DS(1)EEEEEER	17	4	0.18556			1110;1111;1112;1113;1114	1111	32344	48398	37496	23746	23317	22925
sp|O43159|RRP8_HUMAN	64	sp|O43159|RRP8_HUMAN	sp|O43159|RRP8_HUMAN	>sp|O43159|RRP8_HUMAN Ribosomal RNA-processing protein 8 OS=Homo sapiens OX=9606 GN=RRP8 PE=1 SV=2	1	7.16e-46	157.94	2	S	AASLSQHPPSLCISDSEEEEEERKKKCPKKA	X;X;X;X;X;X;X;X;X;X;X;X;X;Phospho (STY);X;Phospho (STY);X;X;X;X;X;X;X;X;X;X;X;X;X;X;X	PPPPPPPPPPPPPPPPPPPPPPPXXXXXXXX	ALEAASLSQHPPSLCIS(1)DS(1)EEEEEER	19	4	0.18556			1110;1111;1112;1113;1114	1111	32344	48398	37496	23746	23317	22925
sp|O43164|PJA2_HUMAN	253	sp|O43164|PJA2_HUMAN	sp|O43164|PJA2_HUMAN	>sp|O43164|PJA2_HUMAN E3 ubiquitin-protein ligase Praja-2 OS=Homo sapiens OX=9606 GN=PJA2 PE=1 SV=4	0.999999	2.28e-08	79.545	1	S	LVKSSAGDTEFVHQNSQEIQRSSQDEMVSTK	X;X;X;X;X;X;X;X;X;X;X;X;X;X;X;Phospho (STY);X;X;X;X;X;X;X;X;X;X;X;X;X;X;X	XXXPPPPPPPPPPPPPPPPPPXXXXXXXXXX	SSAGDTEFVHQNS(1)QEIQR	13	3	-0.21249			17090;17091	17090	19155	34053	28497	13807	11791	11419
sp|O43166|SI1L1_HUMAN	208	sp|O43166|SI1L1_HUMAN	sp|O43166|SI1L1_HUMAN	>sp|O43166|SI1L1_HUMAN Signal-induced proliferation-associated 1-like protein 1 OS=Homo sapiens OX=9606 GN=SIPA1L1 PE=1 SV=4	0.928967	0.00284807	35.477	1	S	SPTYKTGPSLHREYGSTSSIDKQGTSGESFF	X;X;X;X;X;X;X;X;X;X;X;X;X;X;X;Phospho (STY);X;X;X;X;X;X;X;X;X;X;X;X;X;X;X	XXXXXXXXXXXXPPPPPPPPPPXXXXXXXXX	EYGS(0.929)T(0.051)S(0.018)S(0.001)IDK	4	2	0.32553			5232	5232	18043	24043	16156	15152	10946	9533.8
sp|O43166|SI1L1_HUMAN	1549	sp|O43166|SI1L1_HUMAN	sp|O43166|SI1L1_HUMAN	>sp|O43166|SI1L1_HUMAN Signal-induced proliferation-associated 1-like protein 1 OS=Homo sapiens OX=9606 GN=SIPA1L1 PE=1 SV=4	0.796717	4e-06	77.893	1	S	KSTIEEDLKKLIDLESPTPESQKSFKFHALS	X;X;X;X;X;X;X;X;X;X;X;X;X;X;X;Phospho (STY);X;X;X;X;X;X;X;X;X;X;X;X;X;X;X	XXXXXXXXXXPPPPPPPPPPPPPXXXXXXXX	LIDLES(0.797)PT(0.203)PESQK	6	3	-0.38363			10544;10545	10544	29482	43616	27137	23043	20503	16296
sp|O43166|SI1L1_HUMAN	1181	sp|O43166|SI1L1_HUMAN	sp|O43166|SI1L1_HUMAN	>sp|O43166|SI1L1_HUMAN Signal-induced proliferation-associated 1-like protein 1 OS=Homo sapiens OX=9606 GN=SIPA1L1 PE=1 SV=4	0.998663	0.0120678	19.696	1	S	YRQKSMPEGFGVSRRSPASIDRQNTQSDIGG	X;X;X;X;X;X;X;X;X;X;X;X;X;X;X;Phospho (STY);X;X;X;X;X;X;X;X;X;X;X;X;X;X;X	XXXXXXXXXXXXXXPPPPPPPPXXXXXXXXX	RS(0.999)PAS(0.001)IDR	2	3	1.2317			14314	14314	1905.2	3725.3	2876.5	1517.4	1510.8	1266.3
sp|O43166|SI1L1_HUMAN	1585	sp|O43166|SI1L1_HUMAN	sp|O43166|SI1L1_HUMAN	>sp|O43166|SI1L1_HUMAN Signal-induced proliferation-associated 1-like protein 1 OS=Homo sapiens OX=9606 GN=SIPA1L1 PE=1 SV=4	0.778643	8.4e-12	107.7	1	S	FPSTPTSRRALHRTLSDESIYNSQREHFFTS	X;X;X;X;X;X;X;X;X;X;X;X;X;X;X;Phospho (STY);X;X;X;X;X;X;X;X;X;X;X;X;X;X;X	XXXXXXXXXXXXXPPPPPPPPPPPPXXXXXX	T(0.218)LS(0.779)DES(0.003)IYNSQR	3	3	-0.45268			18506;18507;18509	18509	47407	74093	46598	38227	34431	27199
sp|O43236|SEPT4_HUMAN	325	sp|O43236|SEPT4_HUMAN	sp|O43236|SEPT4_HUMAN	>sp|O43236|SEPT4_HUMAN Septin-4 OS=Homo sapiens OX=9606 GN=SEPTIN4 PE=1 SV=1	1	1.14e-53	165.62	1	S	IEHFGIKIYQFPDCDSDEDEDFKLQDQALKE	X;X;X;X;X;X;X;X;X;X;X;X;X;X;X;Phospho (STY);X;X;X;X;X;X;X;X;X;X;X;X;X;X;X	XXXXXXXPPPPPPPPPPPPPPPPPPPPPPPX	IYQFPDCDS(1)DEDEDFKLQDQALK	9	3	0.73177			8271;8272;8273;8274;8275;8276;8277;8278	8278	134260	174040	162860	109560	121020	95187
sp|O43236|SEPT4_HUMAN	117	sp|O43236|SEPT4_HUMAN	sp|O43236|SEPT4_HUMAN	>sp|O43236|SEPT4_HUMAN Septin-4 OS=Homo sapiens OX=9606 GN=SEPTIN4 PE=1 SV=1	0.977938	5.65e-06	48.089	2	S	SARPRSPWGKLDPYDSSEDDKEYVGFATLPN	X;X;X;X;X;X;X;X;X;X;X;X;X;X;X;Phospho (STY);Phospho (STY);X;X;X;X;X;X;X;X;X;X;X;X;X;X	XXXXXXXXXXPPPPPPPPPPPPPPPPPPPPP	LDPY(0.01)DS(0.978)S(0.978)EDDKEY(0.033)VGFAT(0.001)LPNQVHR	6	4	-0.57362			10183	10183	5871.2	7847.3	6739.2	4764.5	4646.8	3967.3
sp|O43236|SEPT4_HUMAN	118	sp|O43236|SEPT4_HUMAN	sp|O43236|SEPT4_HUMAN	>sp|O43236|SEPT4_HUMAN Septin-4 OS=Homo sapiens OX=9606 GN=SEPTIN4 PE=1 SV=1	0.977938	2.39e-22	109.23	1;2	S	ARPRSPWGKLDPYDSSEDDKEYVGFATLPNQ	X;X;X;X;X;X;X;X;X;X;X;X;X;X;Phospho (STY);Phospho (STY);X;X;X;X;X;X;X;X;X;X;X;X;X;X;X	XXXXXXXXXPPPPPPPPPPPPPPPPPPPPPP	LDPY(0.01)DS(0.978)S(0.978)EDDKEY(0.033)VGFAT(0.001)LPNQVHR	7	4	-0.57362			10182;10183	10183	11304	15010	12221	9527.5	8407.1	7862.8
sp|O43236|SEPT4_HUMAN	432	sp|O43236|SEPT4_HUMAN	sp|O43236|SEPT4_HUMAN	>sp|O43236|SEPT4_HUMAN Septin-4 OS=Homo sapiens OX=9606 GN=SEPTIN4 PE=1 SV=1	0.355128	0.000303517	44.263		S	RLVVKERNRNKLTRESGTDFPIPAVPPGTDP	X;X;X;X;X;X;X;X;X;X;X;X;X;X;X;X;X;X;X;X;X;X;X;X;X;X;X;X;X;X;X	XXXXXXXXXXXXXXXXXXXXXXXXXXXXXXX	LT(0.355)RES(0.355)GT(0.29)DFPIPAVPPGTDPETEK	5	4	0.024036				11249	0	0	0	0	0	0
sp|O43237|DC1L2_HUMAN	194	sp|O43237|DC1L2_HUMAN	sp|O43237|DC1L2_HUMAN	>sp|O43237|DC1L2_HUMAN Cytoplasmic dynein 1 light intermediate chain 2 OS=Homo sapiens OX=9606 GN=DYNC1LI2 PE=1 SV=1	0.999998	1.55e-08	89.914	1	S	KDFQDYMEPEEGCQGSPQRRGPLTSGSDEEN	X;X;X;X;X;X;X;X;X;X;X;X;X;X;X;Phospho (STY);X;X;X;X;X;X;X;X;X;X;X;X;X;X;X	XPPPPPPPPPPPPPPPPPPPXXXXXXXXXXX	DFQDYMEPEEGCQGS(1)PQR	15	3	-0.29574			2561;2562;2563;2564	2561	41706	75520	57984	33645	31185	30104
sp|O43281|EFS_HUMAN	298	sp|O43281|EFS_HUMAN	sp|O43281|EFS_HUMAN	>sp|O43281|EFS_HUMAN Embryonal Fyn-associated substrate OS=Homo sapiens OX=9606 GN=EFS PE=1 SV=1	0.992604	0.00506876	48.111	1	S	LLARSPPPPHRPRLPSAESLSRRPLPALPVP	X;X;X;X;X;X;X;X;X;X;X;X;X;X;X;Phospho (STY);X;X;X;X;X;X;X;X;X;X;X;X;X;X;X	XXXXXXXXXXXXXPPPPPPPPPXXXXXXXXX	LPS(0.993)AES(0.007)LSR	3	2	-1.7208			10870	10870	20644	24413	23061	15033	14103	13614
sp|O43290|SNUT1_HUMAN	448	sp|O43290|SNUT1_HUMAN	sp|O43290|SNUT1_HUMAN	>sp|O43290|SNUT1_HUMAN U4/U6.U5 tri-snRNP-associated protein 1 OS=Homo sapiens OX=9606 GN=SART1 PE=1 SV=1	1	1.2e-14	103.93	1	S	GDFGSRLRGRGRRRVSEVEEEKEPVPQPLPS	X;X;X;X;X;X;X;X;X;X;X;X;X;X;X;Phospho (STY);X;X;X;X;X;X;X;X;X;X;X;X;X;X;X	XXXXXXXXXXXXXPPPPPPPPPPPPPPPPPP	RVS(1)EVEEEKEPVPQPLPSDDTR	3	4	-0.3165			14642;14643;14644	14644	46034	74431	59644	38805	32262	30109
sp|O43290|SNUT1_HUMAN	474	sp|O43290|SNUT1_HUMAN	sp|O43290|SNUT1_HUMAN	>sp|O43290|SNUT1_HUMAN U4/U6.U5 tri-snRNP-associated protein 1 OS=Homo sapiens OX=9606 GN=SART1 PE=1 SV=1	1	1.11e-23	104.82	2	S	QPLPSDDTRVENMDISDEEEGGAPPPGSPQV	X;X;X;X;X;X;X;X;X;X;X;X;X;X;X;Phospho (STY);X;X;X;X;X;X;X;X;X;X;X;Phospho (STY);X;X;X	XXXXXXXXXPPPPPPPPPPPPPPPPPPPPPP	VENMDIS(1)DEEEGGAPPPGS(1)PQVLEEDEAELELQK	7	4	-0.38334			19590;19591;19592	19592	14638	31641	15322	12763	14656	11194
sp|O43290|SNUT1_HUMAN	486	sp|O43290|SNUT1_HUMAN	sp|O43290|SNUT1_HUMAN	>sp|O43290|SNUT1_HUMAN U4/U6.U5 tri-snRNP-associated protein 1 OS=Homo sapiens OX=9606 GN=SART1 PE=1 SV=1	1	1.11e-23	104.82	2	S	MDISDEEEGGAPPPGSPQVLEEDEAELELQK	X;X;X;Phospho (STY);X;X;X;X;X;X;X;X;X;X;X;Phospho (STY);X;X;X;X;X;X;X;X;X;X;X;X;X;X;X	PPPPPPPPPPPPPPPPPPPPPPPPPPPPPPP	VENMDIS(1)DEEEGGAPPPGS(1)PQVLEEDEAELELQK	19	4	-0.38334			19590;19591;19592	19592	14638	31641	15322	12763	14656	11194
sp|O43294|TGFI1_HUMAN	137	sp|O43294|TGFI1_HUMAN	sp|O43294|TGFI1_HUMAN	>sp|O43294|TGFI1_HUMAN Transforming growth factor beta-1-induced transcript 1 protein OS=Homo sapiens OX=9606 GN=TGFB1I1 PE=1 SV=2	0.998699	1.42e-06	69.922	2;3	S	SGEQKEDQSEDKKRPSLPSSPSPGLPKASAT	X;X;X;X;X;X;X;X;X;X;X;X;X;X;X;Phospho (STY);X;X;Phospho (STY);Phospho (STY);X;Phospho (STY);X;X;X;X;X;X;X;X;X	XXXXXXXXXXXXPPPPPPPPPPPPPPPXXXX	KRPS(0.999)LPS(0.785)S(0.176)PS(0.041)PGLPK	4	4	0.11378			9666;9667;9668;9669;9670;9671;9672;9673;9674;9676;9677;9678;9679;9680;9681;9682	9677	242550	237540	226380	208570	228530	254710
sp|O43294|TGFI1_HUMAN	140	sp|O43294|TGFI1_HUMAN	sp|O43294|TGFI1_HUMAN	>sp|O43294|TGFI1_HUMAN Transforming growth factor beta-1-induced transcript 1 protein OS=Homo sapiens OX=9606 GN=TGFB1I1 PE=1 SV=2	0.853053	1.18e-06	74.928	2;3	S	QKEDQSEDKKRPSLPSSPSPGLPKASATSAT	X;X;X;X;X;X;X;X;X;X;X;X;Phospho (STY);X;X;Phospho (STY);Phospho (STY);X;Phospho (STY);X;X;X;X;X;X;X;X;X;X;X;X	XXXXXXXXXPPPPPPPPPPPPPPPXXXXXXX	KRPS(0.077)LPS(0.853)S(0.62)PS(0.45)PGLPK	7	4	-0.18743			9666;9672;9675;9677;9678;9679;9680;9682	9675	112090	97838	99250	98208	119560	141240
sp|O43294|TGFI1_HUMAN	141	sp|O43294|TGFI1_HUMAN	sp|O43294|TGFI1_HUMAN	>sp|O43294|TGFI1_HUMAN Transforming growth factor beta-1-induced transcript 1 protein OS=Homo sapiens OX=9606 GN=TGFB1I1 PE=1 SV=2	0.863375	1.18e-06	74.928	2;3	S	KEDQSEDKKRPSLPSSPSPGLPKASATSATL	X;X;X;X;X;X;X;X;X;X;X;Phospho (STY);X;X;Phospho (STY);Phospho (STY);X;Phospho (STY);X;X;X;X;X;X;X;X;X;X;X;X;X	XXXXXXXXPPPPPPPPPPPPPPPXXXXXXXX	KRPS(0.935)LPS(0.136)S(0.863)PS(0.065)PGLPK	8	3	0.88623			9667;9668;9669;9671;9673;9675;9679;9680;9681;9682	9673	166030	167380	155770	142220	157960	172630
sp|O43294|TGFI1_HUMAN	143	sp|O43294|TGFI1_HUMAN	sp|O43294|TGFI1_HUMAN	>sp|O43294|TGFI1_HUMAN Transforming growth factor beta-1-induced transcript 1 protein OS=Homo sapiens OX=9606 GN=TGFB1I1 PE=1 SV=2	0.965153	4.24e-05	59.342	1;2;3	S	DQSEDKKRPSLPSSPSPGLPKASATSATLEL	X;X;X;X;X;X;X;X;X;Phospho (STY);X;X;Phospho (STY);Phospho (STY);X;Phospho (STY);X;X;X;X;X;X;X;X;X;X;X;X;X;X;X	XXXXXXPPPPPPPPPPPPPPPXXXXXXXXXX	KRPS(0.986)LPS(0.525)S(0.525)PS(0.965)PGLPK	10	4	-0.58184			9670;9674;9676;9678;9679;9680;9681;9682;9683;14059;14060	9679	144000	151710	136390	123340	124440	132380
sp|O43294|TGFI1_HUMAN	403	sp|O43294|TGFI1_HUMAN	sp|O43294|TGFI1_HUMAN	>sp|O43294|TGFI1_HUMAN Transforming growth factor beta-1-induced transcript 1 protein OS=Homo sapiens OX=9606 GN=TGFB1I1 PE=1 SV=2	0.999995	1.28e-11	98.432	1	S	EGRPLCENHFHARRGSLCATCGLPVTGRCVS	X;X;X;X;X;X;X;X;X;X;X;X;X;X;X;Phospho (STY);X;X;X;X;X;X;X;X;X;X;X;X;X;X;X	XXXXXXXXXXXXXPPPPPPPPPPPPPPPXXX	RGS(1)LCATCGLPVTGR	3	3	-0.56669			13479;13480;13481	13481	36174	50427	39932	31591	29068	27902
sp|O43294|TGFI1_HUMAN	68	sp|O43294|TGFI1_HUMAN	sp|O43294|TGFI1_HUMAN	>sp|O43294|TGFI1_HUMAN Transforming growth factor beta-1-induced transcript 1 protein OS=Homo sapiens OX=9606 GN=TGFB1I1 PE=1 SV=2	0.999794	5.09e-10	72.275	1	S	SGDKDHLYSTVCKPRSPKPAAPAAPPFSSSS	X;X;X;X;X;X;X;X;X;X;X;X;X;X;X;Phospho (STY);X;X;X;X;X;X;X;X;X;X;X;X;X;X;X	XXXXXXXXXXXXXXXPPPPPPPPPPPPPPPP	S(1)PKPAAPAAPPFSSSSGVLGTGLCELDR	1	3	0.020708			16469;16471;16472;16473	16472	31443	36071	32315	25079	24380	24924
sp|O43294|TGFI1_HUMAN	80	sp|O43294|TGFI1_HUMAN	sp|O43294|TGFI1_HUMAN	>sp|O43294|TGFI1_HUMAN Transforming growth factor beta-1-induced transcript 1 protein OS=Homo sapiens OX=9606 GN=TGFB1I1 PE=1 SV=2	0.261509	9.63e-07	48.65		S	KPRSPKPAAPAAPPFSSSSGVLGTGLCELDR	X;X;X;X;X;X;X;X;X;X;X;X;X;X;X;Phospho (STY);X;X;X;X;X;X;X;X;X;X;X;X;X;X;X	XXXPPPPPPPPPPPPPPPPPPPPPPPPPPPP	S(0.124)PKPAAPAAPPFS(0.262)S(0.262)S(0.262)S(0.092)GVLGTGLCELDR	13	4	0.16387				16470	0	0	0	0	0	0
sp|O43294|TGFI1_HUMAN	81	sp|O43294|TGFI1_HUMAN	sp|O43294|TGFI1_HUMAN	>sp|O43294|TGFI1_HUMAN Transforming growth factor beta-1-induced transcript 1 protein OS=Homo sapiens OX=9606 GN=TGFB1I1 PE=1 SV=2	0.261509	9.63e-07	48.65		S	PRSPKPAAPAAPPFSSSSGVLGTGLCELDRL	X;X;X;X;X;X;X;X;X;X;X;X;X;X;X;X;X;X;X;X;X;X;X;X;X;X;X;X;X;X;X	XXXXXXXXXXXXXXXXXXXXXXXXXXXXXXX	S(0.124)PKPAAPAAPPFS(0.262)S(0.262)S(0.262)S(0.092)GVLGTGLCELDR	14	4	0.16387				16470	0	0	0	0	0	0
sp|O43294|TGFI1_HUMAN	82	sp|O43294|TGFI1_HUMAN	sp|O43294|TGFI1_HUMAN	>sp|O43294|TGFI1_HUMAN Transforming growth factor beta-1-induced transcript 1 protein OS=Homo sapiens OX=9606 GN=TGFB1I1 PE=1 SV=2	0.261509	9.63e-07	48.65		S	RSPKPAAPAAPPFSSSSGVLGTGLCELDRLL	X;X;X;X;X;X;X;X;X;X;X;X;X;X;X;X;X;X;X;X;X;X;X;X;X;X;X;X;X;X;X	XXXXXXXXXXXXXXXXXXXXXXXXXXXXXXX	S(0.124)PKPAAPAAPPFS(0.262)S(0.262)S(0.262)S(0.092)GVLGTGLCELDR	15	4	0.16387				16470	0	0	0	0	0	0
sp|O43294|TGFI1_HUMAN	186	sp|O43294|TGFI1_HUMAN	sp|O43294|TGFI1_HUMAN	>sp|O43294|TGFI1_HUMAN Transforming growth factor beta-1-induced transcript 1 protein OS=Homo sapiens OX=9606 GN=TGFB1I1 PE=1 SV=2	0.235982	1.49e-05	38.555		S	QNHLPASGPTQPPVVSSTNEGSPSPPEPTGK	X;X;X;X;X;X;X;X;X;X;X;X;X;X;X;Phospho (STY);X;X;X;X;X;X;X;X;X;X;X;X;X;X;X	PPPPPPPPPPPPPPPPPPPPPPPPPPPPPPP	VQNHLPAS(0.005)GPT(0.013)QPPVVS(0.236)S(0.236)T(0.236)NEGS(0.236)PS(0.037)PPEPTGK	17	4	-0.37219				20124	0	0	0	0	0	0
sp|O43294|TGFI1_HUMAN	187	sp|O43294|TGFI1_HUMAN	sp|O43294|TGFI1_HUMAN	>sp|O43294|TGFI1_HUMAN Transforming growth factor beta-1-induced transcript 1 protein OS=Homo sapiens OX=9606 GN=TGFB1I1 PE=1 SV=2	0.235982	1.49e-05	38.555		S	NHLPASGPTQPPVVSSTNEGSPSPPEPTGKG	X;X;X;X;X;X;X;X;X;X;X;X;X;X;X;X;X;X;X;X;X;X;X;X;X;X;X;X;X;X;X	XXXXXXXXXXXXXXXXXXXXXXXXXXXXXXX	VQNHLPAS(0.005)GPT(0.013)QPPVVS(0.236)S(0.236)T(0.236)NEGS(0.236)PS(0.037)PPEPTGK	18	4	-0.37219				20124	0	0	0	0	0	0
sp|O43294|TGFI1_HUMAN	192	sp|O43294|TGFI1_HUMAN	sp|O43294|TGFI1_HUMAN	>sp|O43294|TGFI1_HUMAN Transforming growth factor beta-1-induced transcript 1 protein OS=Homo sapiens OX=9606 GN=TGFB1I1 PE=1 SV=2	0.235982	1.49e-05	38.555		S	SGPTQPPVVSSTNEGSPSPPEPTGKGSLDTM	X;X;X;X;X;X;X;X;X;X;X;X;X;X;X;X;X;X;X;X;X;X;X;X;X;X;X;X;X;X;X	XXXXXXXXXXXXXXXXXXXXXXXXXXXXXXX	VQNHLPAS(0.005)GPT(0.013)QPPVVS(0.236)S(0.236)T(0.236)NEGS(0.236)PS(0.037)PPEPTGK	23	4	-0.37219				20124	0	0	0	0	0	0
sp|O43306|ADCY6_HUMAN	54	sp|O43306|ADCY6_HUMAN	sp|O43306|ADCY6_HUMAN	>sp|O43306|ADCY6_HUMAN Adenylate cyclase type 6 OS=Homo sapiens OX=9606 GN=ADCY6 PE=1 SV=2	0.99661	4.53e-09	89.636	1	S	CTPRYMSCLRDAEPPSPTPAGPPRCPWQDDA	X;X;X;X;X;X;X;X;X;X;X;X;X;X;X;Phospho (STY);X;X;X;X;X;X;X;X;X;X;X;X;X;X;X	XXXXXXXXXXPPPPPPPPPPPPPPXXXXXXX	DAEPPS(0.997)PT(0.003)PAGPPR	6	3	-0.18941			2412;2413;2414	2412	34924	52792	41070	31370	29772	27398
sp|O43310|CTIF_HUMAN	299	sp|O43310|CTIF_HUMAN	sp|O43310|CTIF_HUMAN	>sp|O43310|CTIF_HUMAN CBP80/20-dependent translation initiation factor OS=Homo sapiens OX=9606 GN=CTIF PE=1 SV=1	0.899417	6.7e-07	50.4	1	S	DTAGDTGHSSLEAPRSPDTLAPVASERLPPQ	X;X;X;X;X;X;X;X;X;X;X;X;X;X;X;Phospho (STY);X;X;X;X;X;X;X;X;X;X;X;X;X;X;X	PPPPPPPPPPPPPPPPPPPPPPPPPPPXXXX	LEDTAGDT(0.001)GHS(0.007)S(0.005)LEAPRS(0.899)PDT(0.076)LAPVAS(0.012)ER	18	4	0.27486			10258	10258	9626.2	10804	10363	6863.3	6468.1	5792.9
sp|O43314|VIP2_HUMAN	38	sp|O43314|VIP2_HUMAN	sp|O43314|VIP2_HUMAN	>sp|O43314|VIP2_HUMAN Inositol hexakisphosphate and diphosphoinositol-pentakisphosphate kinase 2 OS=Homo sapiens OX=9606 GN=PPIP5K2 PE=1 SV=3	1	2.77e-10	83.866	1	S	HFFHHADEDDEEEDDSPPERQIVVGICSMAK	X;X;X;X;X;X;X;X;X;X;X;X;X;X;X;Phospho (STY);X;X;X;X;X;X;X;X;X;X;X;X;X;X;X	PPPPPPPPPPPPPPPPPPPPXXXXXXXXXXX	HFFHHADEDDEEEDDS(1)PPER	16	3	-0.9002			7518;7519	7519	14160	25572	19539	11715	10469	9137.3
sp|O43314|VIP2_HUMAN	1006	sp|O43314|VIP2_HUMAN	sp|O43314|VIP2_HUMAN	>sp|O43314|VIP2_HUMAN Inositol hexakisphosphate and diphosphoinositol-pentakisphosphate kinase 2 OS=Homo sapiens OX=9606 GN=PPIP5K2 PE=1 SV=3	0.957247	0.00318679	41.855	2	S	LHYTSGVGTGRRRRRSGEQITSSPVSPKSLA	X;X;X;X;X;X;X;X;X;X;X;X;X;X;X;Phospho (STY);X;X;X;X;X;X;X;X;X;Phospho (STY);X;X;X;X;X	XXXXXXXXXXXXXXXPPPPPPPPPPPPPXXX	S(0.957)GEQIT(0.042)S(0.02)S(0.017)PVS(0.963)PK	1	3	-0.21117			15404	15404	10153	18427	13815	9059.1	8723.3	8574.2
sp|O43314|VIP2_HUMAN	1016	sp|O43314|VIP2_HUMAN	sp|O43314|VIP2_HUMAN	>sp|O43314|VIP2_HUMAN Inositol hexakisphosphate and diphosphoinositol-pentakisphosphate kinase 2 OS=Homo sapiens OX=9606 GN=PPIP5K2 PE=1 SV=3	0.962938	0.00318679	41.855	2	S	RRRRRSGEQITSSPVSPKSLAFTSSIFGSWQ	X;X;X;X;X;Phospho (STY);X;X;X;X;X;X;X;X;X;Phospho (STY);X;X;X;X;X;X;X;X;X;X;X;X;X;X;X	XXXXXPPPPPPPPPPPPPXXXXXXXXXXXXX	S(0.957)GEQIT(0.042)S(0.02)S(0.017)PVS(0.963)PK	11	3	-0.21117			15404	15404	10153	18427	13815	9059.1	8723.3	8574.2
sp|O43318|M3K7_HUMAN	439	sp|O43318|M3K7_HUMAN	sp|O43318|M3K7_HUMAN	>sp|O43318|M3K7_HUMAN Mitogen-activated protein kinase kinase kinase 7 OS=Homo sapiens OX=9606 GN=MAP3K7 PE=1 SV=1	0.993825	4.46e-20	108.59	1	S	VPEIVISGNGQPRRRSIQDLTVTGTEPGQVS	X;X;X;X;X;X;X;X;X;X;X;X;X;X;X;Phospho (STY);X;X;X;X;X;X;X;X;X;X;X;X;X;X;X	XXXXXXXXXXXXXXXPPPPPPPPPPPPPPPP	S(0.994)IQDLT(0.006)VTGTEPGQVSSR	1	3	0.62074			15708	15708	10624	13555	11860	7769.9	7548.2	6511.1
sp|O43395|PRPF3_HUMAN	133	sp|O43395|PRPF3_HUMAN	sp|O43395|PRPF3_HUMAN	>sp|O43395|PRPF3_HUMAN U4/U6 small nuclear ribonucleoprotein Prp3 OS=Homo sapiens OX=9606 GN=PRPF3 PE=1 SV=2	0.928191	2.17e-09	75.184	1	S	EVEEEPEVIPGPPSESPGMLTKLQIKQMMEA	X;X;X;X;X;X;X;X;X;X;X;X;X;X;X;Phospho (STY);X;X;X;X;X;X;X;X;X;X;X;X;X;X;X	PPPPPPPPPPPPPPPPPPPPPPXXXXXXXXX	FEEVEEEPEVIPGPPS(0.07)ES(0.928)PGMLT(0.002)K	18	4	1.0926			5292;5293	5293	7865.2	14847	13701	6774.8	9039.2	8978.2
sp|O43395|PRPF3_HUMAN	619	sp|O43395|PRPF3_HUMAN	sp|O43395|PRPF3_HUMAN	>sp|O43395|PRPF3_HUMAN U4/U6 small nuclear ribonucleoprotein Prp3 OS=Homo sapiens OX=9606 GN=PRPF3 PE=1 SV=2	1	3.67e-19	126.08	1	S	WDEQTSNTKGDDDEESDEEAVKKTNKCVLVW	X;X;X;X;X;X;X;X;X;X;X;X;X;X;X;Phospho (STY);X;X;X;X;X;X;X;X;X;X;X;X;X;X;X	PPPPPPPPPPPPPPPPPPPPPPPXXXXXXXX	GDDDEES(1)DEEAVKK	7	3	0.086534			5730;5731;5732;5733;7988;7989;20437;20438;20439	5733	95853	157100	153590	66457	59272	61460
sp|O43399|TPD54_HUMAN	21	sp|O43399|TPD54_HUMAN	sp|O43399|TPD54_HUMAN	>sp|O43399|TPD54_HUMAN Tumor protein D54 OS=Homo sapiens OX=9606 GN=TPD52L2 PE=1 SV=2	0.948713	1.05e-17	111.32	1	S	QDINLNSPNKGLLSDSMTDVPVDTGVAARTP	X;X;X;X;X;X;X;X;X;X;X;X;X;X;X;Phospho (STY);X;X;X;X;X;X;X;X;X;X;X;X;X;X;X	XXXXXXXXXXPPPPPPPPPPPPPPPPPPPXX	GLLS(0.026)DS(0.949)MT(0.025)DVPVDTGVAAR	6	3	0.16096			6296;6297	6297	9892.7	16035	13913	8568.9	8954.1	6920.2
sp|O43399|TPD54_HUMAN	166	sp|O43399|TPD54_HUMAN	sp|O43399|TPD54_HUMAN	>sp|O43399|TPD54_HUMAN Tumor protein D54 OS=Homo sapiens OX=9606 GN=TPD52L2 PE=1 SV=2	0.999967	1.73e-05	71.55	1	S	ISRKLGDMRNSATFKSFEDRVGTIKSKVVGD	X;X;X;X;X;X;X;X;X;X;X;X;X;X;X;Phospho (STY);X;X;X;X;X;X;X;X;X;X;X;X;X;X;X	XXXXXXXXXPPPPPPPPPPPXXXXXXXXXXX	NSATFKS(1)FEDR	7	2	0.1122			11925;11926;11927;11928;11929	11927	118590	185400	136180	62930	57880	59430
sp|O43432|IF4G3_HUMAN	1156	sp|O43432|IF4G3_HUMAN	sp|O43432|IF4G3_HUMAN	>sp|O43432|IF4G3_HUMAN Eukaryotic translation initiation factor 4 gamma 3 OS=Homo sapiens OX=9606 GN=EIF4G3 PE=1 SV=2	0.927405	7.29e-08	75.809	1	S	LPSATARPNTFMRGGSSKDLLDNQSQEEQRR	X;X;X;X;X;X;X;X;X;X;X;X;X;X;X;Phospho (STY);X;X;X;X;X;X;X;X;X;X;X;X;X;X;X	XXXXXXXXXXXXXPPPPPPPPPPPPPPPPPX	GGS(0.927)S(0.072)KDLLDNQSQEEQR	3	3	1.1698			6116;6117	6116	25589	49968	34573	18816	17363	15628
sp|O43432|IF4G3_HUMAN	1157	sp|O43432|IF4G3_HUMAN	sp|O43432|IF4G3_HUMAN	>sp|O43432|IF4G3_HUMAN Eukaryotic translation initiation factor 4 gamma 3 OS=Homo sapiens OX=9606 GN=EIF4G3 PE=1 SV=2	0.594384	3.37e-07	65.576	1	S	PSATARPNTFMRGGSSKDLLDNQSQEEQRRE	X;X;X;X;X;X;X;X;X;X;X;X;X;X;X;Phospho (STY);X;X;X;X;X;X;X;X;X;X;X;X;X;X;X	XXXXXXXXXXXXPPPPPPPPPPPPPPPPPXX	GGS(0.404)S(0.594)KDLLDNQS(0.002)QEEQR	4	3	-0.5044			6115	6115	15693	36296	21098	13170	11572	8293.4
sp|O43432|IF4G3_HUMAN	232	sp|O43432|IF4G3_HUMAN	sp|O43432|IF4G3_HUMAN	>sp|O43432|IF4G3_HUMAN Eukaryotic translation initiation factor 4 gamma 3 OS=Homo sapiens OX=9606 GN=EIF4G3 PE=1 SV=2	0.945016	0.0109212	35.922	1	S	KQEEKPKPDPVLKSPSPVLRLVLSGEKKEQE	X;X;X;X;X;X;X;X;X;X;X;X;X;X;X;Phospho (STY);X;X;X;X;X;X;X;X;X;X;X;X;X;X;X	XXXXXXXXXXXXXPPPPPPPXXXXXXXXXXX	S(0.055)PS(0.945)PVLR	3	2	0.082583			16608;16609;16610	16610	46049	75354	58019	37986	30870	25872
sp|O43491|E41L2_HUMAN	718	sp|O43491|E41L2_HUMAN	sp|O43491|E41L2_HUMAN	>sp|O43491|E41L2_HUMAN Band 4.1-like protein 2 OS=Homo sapiens OX=9606 GN=EPB41L2 PE=1 SV=1	0.762	0.000960846	37.952	1	S	RVITEEMNGKEISPGSGPGEIRKVEPVTQKD	X;X;X;X;X;X;X;X;X;X;X;X;X;X;X;Phospho (STY);X;X;X;X;X;X;X;X;X;X;X;X;X;X;X	XXXXXXXXXXPPPPPPPPPPPPXXXXXXXXX	EIS(0.238)PGS(0.762)GPGEIR	6	2	-0.084742			4120;4121	4121	37470	58803	47262	31912	32043	27006
sp|O43491|E41L2_HUMAN	38	sp|O43491|E41L2_HUMAN	sp|O43491|E41L2_HUMAN	>sp|O43491|E41L2_HUMAN Band 4.1-like protein 2 OS=Homo sapiens OX=9606 GN=EPB41L2 PE=1 SV=1	0.574602	1.15e-31	117.78	1	S	TKEKPKEVAENQQNQSSDPEEEKGSQPPPAA	X;X;X;X;X;X;X;X;X;X;X;X;X;X;X;Phospho (STY);X;X;X;X;X;X;X;X;X;X;X;X;X;X;X	XXXXXXPPPPPPPPPPPPPPPPPPPPPPPPP	EVAENQQNQS(0.575)S(0.425)DPEEEKGSQPPPAAESQSSLR	10	4	-0.3476			5092;5097	5097	16901	18818	13936	13706	11048	9174.1
sp|O43491|E41L2_HUMAN	39	sp|O43491|E41L2_HUMAN	sp|O43491|E41L2_HUMAN	>sp|O43491|E41L2_HUMAN Band 4.1-like protein 2 OS=Homo sapiens OX=9606 GN=EPB41L2 PE=1 SV=1	0.926985	1.39e-17	99.659	1	S	KEKPKEVAENQQNQSSDPEEEKGSQPPPAAE	X;X;X;X;X;X;X;X;X;X;X;X;X;X;X;Phospho (STY);X;X;X;X;X;X;X;X;X;X;X;X;X;X;X	XXXXXPPPPPPPPPPPPPPPPPPPPPPPPPP	EVAENQQNQS(0.073)S(0.927)DPEEEK	11	3	0.25594			5090;5091;5092;5095	5091	40589	46479	35158	30261	28091	22411
sp|O43491|E41L2_HUMAN	55	sp|O43491|E41L2_HUMAN	sp|O43491|E41L2_HUMAN	>sp|O43491|E41L2_HUMAN Band 4.1-like protein 2 OS=Homo sapiens OX=9606 GN=EPB41L2 PE=1 SV=1	0.403479	4.3e-24	103.11		S	DPEEEKGSQPPPAAESQSSLRRQKREKETSE	X;X;X;X;X;X;X;X;X;X;X;X;X;X;X;Phospho (STY);X;X;X;X;X;X;X;X;X;X;X;X;X;X;X	PPPPPPPPPPPPPPPPPPPPPPXXXXXXXXX	EVAENQQNQSSDPEEEKGSQPPPAAES(0.403)QS(0.298)S(0.298)LRR	27	4	-0.78912				5100	0	0	0	0	0	0
sp|O43491|E41L2_HUMAN	57	sp|O43491|E41L2_HUMAN	sp|O43491|E41L2_HUMAN	>sp|O43491|E41L2_HUMAN Band 4.1-like protein 2 OS=Homo sapiens OX=9606 GN=EPB41L2 PE=1 SV=1	0.427572	2.8e-05	62.6		S	EEEKGSQPPPAAESQSSLRRQKREKETSESR	X;X;X;X;X;X;X;X;X;X;X;X;X;X;X;Phospho (STY);X;X;X;X;X;X;X;X;X;X;X;X;X;X;X	XXXXPPPPPPPPPPPPPPPXXXXXXXXXXXX	GSQPPPAAES(0.145)QS(0.428)S(0.428)LR	12	3	0.12349				7163	0	0	0	0	0	0
sp|O43491|E41L2_HUMAN	58	sp|O43491|E41L2_HUMAN	sp|O43491|E41L2_HUMAN	>sp|O43491|E41L2_HUMAN Band 4.1-like protein 2 OS=Homo sapiens OX=9606 GN=EPB41L2 PE=1 SV=1	0.845666	1.83e-19	64.144	1	S	EEKGSQPPPAAESQSSLRRQKREKETSESRG	X;X;X;X;X;X;X;X;X;X;X;X;X;X;X;Phospho (STY);X;X;X;X;X;X;X;X;X;X;X;X;X;X;X	PPPPPPPPPPPPPPPPPPPXXXXXXXXXXXX	GSQPPPAAES(0.098)QS(0.056)S(0.846)LRR	13	3	-0.0049728			5102;7162;7165;7166;7167	7167	45247	56800	57360	29392	27752	28319
sp|O43491|E41L2_HUMAN	598	sp|O43491|E41L2_HUMAN	sp|O43491|E41L2_HUMAN	>sp|O43491|E41L2_HUMAN Band 4.1-like protein 2 OS=Homo sapiens OX=9606 GN=EPB41L2 PE=1 SV=1	0.999489	0.00646937	29.897	1	S	SIAVVQDGDGRREVRSPTKAPHLQLIEGKKN	X;X;X;X;X;X;X;X;X;X;X;X;X;X;X;Phospho (STY);X;X;X;X;X;X;X;X;X;X;X;X;X;X;X	XXXXXXXXXXXXPPPPPPPXXXXXXXXXXXX	EVRS(0.999)PT(0.001)K	4	3	-3.1036			5206;5207;5208	5207	21509	33153	18578	14297	25569	23078
sp|O43491|E41L2_HUMAN	682	sp|O43491|E41L2_HUMAN	sp|O43491|E41L2_HUMAN	>sp|O43491|E41L2_HUMAN Band 4.1-like protein 2 OS=Homo sapiens OX=9606 GN=EPB41L2 PE=1 SV=1	0.358409	4.47e-08	58.973		S	WEKRRITPLSLQTQGSSHETLNIVEEKKRAE	X;X;X;X;X;X;X;X;X;X;X;X;X;X;X;Phospho (STY);X;X;X;X;X;X;X;X;X;X;X;X;X;X;X	XXXXXPPPPPPPPPPPPPPPPPPPPPPXXXX	ITPLS(0.003)LQT(0.01)QGS(0.358)S(0.27)HET(0.358)LNIVEEK	11	4	-0.96512				8201	0	0	0	0	0	0
sp|O43491|E41L2_HUMAN	683	sp|O43491|E41L2_HUMAN	sp|O43491|E41L2_HUMAN	>sp|O43491|E41L2_HUMAN Band 4.1-like protein 2 OS=Homo sapiens OX=9606 GN=EPB41L2 PE=1 SV=1	0.939299	1.28e-32	138.9	1	S	EKRRITPLSLQTQGSSHETLNIVEEKKRAEV	X;X;X;X;X;X;X;X;X;X;X;X;X;X;X;Phospho (STY);X;X;X;X;X;X;X;X;X;X;X;X;X;X;X	XXXXPPPPPPPPPPPPPPPPPPPPPPXXXXX	ITPLSLQT(0.001)QGS(0.06)S(0.939)HETLNIVEEK	12	3	0.70024			8202;8203;8204;8205;8206;8207	8204	95504	100360	75124	68217	65925	59509
sp|O43491|E41L2_HUMAN	499	sp|O43491|E41L2_HUMAN	sp|O43491|E41L2_HUMAN	>sp|O43491|E41L2_HUMAN Band 4.1-like protein 2 OS=Homo sapiens OX=9606 GN=EPB41L2 PE=1 SV=1	1	0.00138686	39.856	1	S	LWKVCVEHHTFYRLVSPEQPPKAKFLTLGSK	X;X;X;X;X;X;X;X;X;X;X;X;X;X;X;Phospho (STY);X;X;X;X;X;X;X;X;X;X;X;X;X;X;X	XXXXXXXXXXXXXPPPPPPPPPXXXXXXXXX	LVS(1)PEQPPK	3	3	0.68991			11308;11309;11310	11310	17290	16458	11865	15178	12661	10439
sp|O43491|E41L2_HUMAN	550	sp|O43491|E41L2_HUMAN	sp|O43491|E41L2_HUMAN	>sp|O43491|E41L2_HUMAN Band 4.1-like protein 2 OS=Homo sapiens OX=9606 GN=EPB41L2 PE=1 SV=1	1	6.11e-06	61.116	1	S	PAPHFERTSSKRVSRSLDGAPIGVMDQSLMK	X;X;X;X;X;X;X;X;X;X;X;X;X;X;X;Phospho (STY);X;X;X;X;X;X;X;X;X;X;X;X;X;X;X	XXXXXXXXXXXXXXXPPPPPPPPPPPPPPPP	S(1)LDGAPIGVMDQSLMK	1	3	-0.76652			15926	15926	3373.8	4272.4	3301.3	2435.8	2971.6	2602.9
sp|O43491|E41L2_HUMAN	87	sp|O43491|E41L2_HUMAN	sp|O43491|E41L2_HUMAN	>sp|O43491|E41L2_HUMAN Band 4.1-like protein 2 OS=Homo sapiens OX=9606 GN=EPB41L2 PE=1 SV=1	0.988698	0.000307877	70.045	1	S	RGISRFIPPWLKKQKSYTLVVAKDGGDKKEP	X;X;X;X;X;X;X;X;X;X;X;X;X;X;X;Phospho (STY);X;X;X;X;X;X;X;X;X;X;X;X;X;X;X	XXXXXXXXXXXXXXXPPPPPPPPXXXXXXXX	S(0.989)YT(0.011)LVVAK	1	2	0.40347			17933;17934;17935	17934	132920	142000	83067	75412	77189	54317
sp|O43493|TGON2_HUMAN	70	sp|O43493|TGON2_HUMAN	sp|O43493|TGON2_HUMAN	>sp|O43493|TGON2_HUMAN Trans-Golgi network integral membrane protein 2 OS=Homo sapiens OX=9606 GN=TGOLN2 PE=1 SV=4	0.499994	2.11e-11	102.01	1	S	KSHPEPQTPKDSPSKSSAEAQTPEDTPNKSG	X;X;X;X;X;X;X;X;X;X;X;X;X;X;X;Phospho (STY);X;X;X;X;X;X;X;X;X;X;X;X;X;X;X	XXXXXXXXXXPPPPPPPPPPPPPPPPPPPXX	S(0.5)S(0.5)AEAQTPEDTPNK	1	3	0.34063			17087;17089	17087	28451	42684	42753	21922	24119	26874
sp|O43493|TGON2_HUMAN	71	sp|O43493|TGON2_HUMAN	sp|O43493|TGON2_HUMAN	>sp|O43493|TGON2_HUMAN Trans-Golgi network integral membrane protein 2 OS=Homo sapiens OX=9606 GN=TGOLN2 PE=1 SV=4	0.874147	9.85e-38	144.65	1	S	SHPEPQTPKDSPSKSSAEAQTPEDTPNKSGA	X;X;X;X;X;X;X;X;X;X;X;X;X;X;X;Phospho (STY);X;X;X;X;X;X;X;X;X;X;X;X;X;X;X	XXXXXXXXXPPPPPPPPPPPPPPPPPPPXXX	DSPS(0.011)KS(0.114)S(0.874)AEAQTPEDTPNK	7	3	0.1022			3144;3145;3146;3147;3148;3150;3151;3152;3153;17087;17089	3145	155520	232350	242950	107030	102470	115790
sp|O43493|TGON2_HUMAN	298	sp|O43493|TGON2_HUMAN	sp|O43493|TGON2_HUMAN	>sp|O43493|TGON2_HUMAN Trans-Golgi network integral membrane protein 2 OS=Homo sapiens OX=9606 GN=TGOLN2 PE=1 SV=4	0.965233	6.88e-36	147.54	1;2	S	LADKGKLSPHAFKTESGEETDLISPPQEEVK	X;X;X;X;X;X;X;X;X;X;X;X;X;X;X;Phospho (STY);X;X;X;X;X;X;X;X;X;X;X;X;X;X;X	XXXXXXPPPPPPPPPPPPPPPPPPPPPPPPP	LSPHAFKT(0.035)ES(0.965)GEETDLISPPQEEVK	10	5	0.06927			11094;11095;11096;11097;11098;11099;18292;18293;18294;18295;18296	11095	110600	186100	161200	83883	81692	77944
sp|O43493|TGON2_HUMAN	351	sp|O43493|TGON2_HUMAN	sp|O43493|TGON2_HUMAN	>sp|O43493|TGON2_HUMAN Trans-Golgi network integral membrane protein 2 OS=Homo sapiens OX=9606 GN=TGOLN2 PE=1 SV=4	0.860554	0.000456742	47.726	1	S	GSPPKEEKEKMSGSASSENREGTLSDSTGSE	X;X;X;X;X;X;X;X;X;X;Oxidation (M);X;X;X;X;Phospho (STY);X;X;X;X;X;X;X;X;X;X;X;X;X;X;X	XXXXXXXXXXPPPPPPPPPPXXXXXXXXXXX	MS(0.018)GS(0.1)AS(0.861)S(0.021)ENR	6	2	-0.090572			11601;11602	11602	9910.2	20744	29739	7127.3	6710.8	7598.1
sp|O43493|TGON2_HUMAN	352	sp|O43493|TGON2_HUMAN	sp|O43493|TGON2_HUMAN	>sp|O43493|TGON2_HUMAN Trans-Golgi network integral membrane protein 2 OS=Homo sapiens OX=9606 GN=TGOLN2 PE=1 SV=4	0.743034	8.54e-07	73.952	1	S	SPPKEEKEKMSGSASSENREGTLSDSTGSEK	X;X;X;X;X;X;X;X;X;X;X;X;X;X;X;Phospho (STY);X;X;X;X;X;X;X;X;X;X;X;X;X;X;X	XXXXXXXXXPPPPPPPPPPXXXXXXXXXXXX	MSGSAS(0.257)S(0.743)ENR	7	2	-0.3784			11600	11600	7590.8	17353	25878	6070.6	6261.2	6759.5
sp|O43493|TGON2_HUMAN	314	sp|O43493|TGON2_HUMAN	sp|O43493|TGON2_HUMAN	>sp|O43493|TGON2_HUMAN Trans-Golgi network integral membrane protein 2 OS=Homo sapiens OX=9606 GN=TGOLN2 PE=1 SV=4	0.402204	3.65e-05	46.114		S	GEETDLISPPQEEVKSSEPTEDVEPKEAEDD	X;X;X;X;X;X;X;X;X;X;X;X;X;X;X;Phospho (STY);X;X;X;X;X;X;X;X;X;X;X;X;X;X;X	PPPPPPPPPPPPPPPPPPPPPPPPPPXXXXX	T(0.452)ES(0.536)GEET(0.013)DLIS(0.103)PPQEEVKS(0.402)S(0.369)EPT(0.124)EDVEPK	19	4	-0.086376				18296	0	0	0	0	0	0
sp|O43561|LAT_HUMAN	224	sp|O43561|LAT_HUMAN	sp|O43561|LAT_HUMAN	>sp|O43561|LAT_HUMAN Linker for activation of T-cells family member 1 OS=Homo sapiens OX=9606 GN=LAT PE=1 SV=1	0.999989	0.000141764	53.464	1	S	SAEASLDGSREYVNVSQELHPGAAKTEPAAL	X;X;X;X;X;X;X;X;X;X;X;X;X;X;X;Phospho (STY);X;X;X;X;X;X;X;X;X;X;X;X;X;X;X	XXXXXXXXXXPPPPPPPPPPPPPPPXXXXXX	EYVNVS(1)QELHPGAAK	6	3	1.2693			5245	5245	21306	24658	22323	17000	12657	15022
sp|O43566|RGS14_HUMAN	203	sp|O43566|RGS14_HUMAN	sp|O43566|RGS14_HUMAN	>sp|O43566|RGS14_HUMAN Regulator of G-protein signaling 14 OS=Homo sapiens OX=9606 GN=RGS14 PE=1 SV=4	0.963669	0.0226425	23.223	1	S	AEGRPLREPGSSRLGSPDATRKKPKLKPGKS	X;X;X;X;X;X;X;X;X;X;X;X;X;X;X;Phospho (STY);X;X;X;X;X;X;X;X;X;X;X;X;X;X;X	XXXXXXXXXXXXXPPPPPPPPXXXXXXXXXX	LGS(0.964)PDAT(0.036)R	3	2	1.6703			10497;10498	10497	24658	34373	27916	19658	14584	14632
sp|O43566|RGS14_HUMAN	288	sp|O43566|RGS14_HUMAN	sp|O43566|RGS14_HUMAN	>sp|O43566|RGS14_HUMAN Regulator of G-protein signaling 14 OS=Homo sapiens OX=9606 GN=RGS14 PE=1 SV=4	0.993541	1.13e-09	83.601	1	S	GFLAFVSSKSESHRKSLGSTEGESESRPGKY	X;X;X;X;X;X;X;X;X;X;X;X;X;X;X;Phospho (STY);X;X;X;X;X;X;X;X;X;X;X;X;X;X;X	XXXXXXXXXXXXXXXPPPPPPPPPPPPPPPX	S(0.994)LGS(0.005)T(0.002)EGESESRPGK	1	3	0.75779			16037;16038	16038	39704	58856	38587	31948	23772	23098
sp|O43583|DENR_HUMAN	73	sp|O43583|DENR_HUMAN	sp|O43583|DENR_HUMAN	>sp|O43583|DENR_HUMAN Density-regulated protein OS=Homo sapiens OX=9606 GN=DENR PE=1 SV=2	0.998633	1.27e-46	157.07	1	S	EKNFPNEFAKLTVENSPKQEAGISEGQGTAG	X;X;X;X;X;X;X;X;X;X;X;X;X;X;X;Phospho (STY);X;X;X;X;X;X;X;X;X;X;X;X;X;X;X	XXXXXXXXXXPPPPPPPPPPPPPPPPPPPPP	LT(0.001)VENS(0.999)PKQEAGISEGQGTAGEEEEK	6	4	-0.70053			11259;11260;11261	11259	31785	58461	40706	27723	20899	21762
sp|O43598|DNPH1_HUMAN	28	sp|O43598|DNPH1_HUMAN	sp|O43598|DNPH1_HUMAN	>sp|O43598|DNPH1_HUMAN 2'-deoxynucleoside 5'-phosphate N-hydrolase 1 OS=Homo sapiens OX=9606 GN=DNPH1 PE=1 SV=1	1	2.27e-09	88.755	1	S	WERGEPGRPALYFCGSIRGGREDRTLYERIV	X;X;X;X;X;X;X;X;X;X;X;X;X;X;X;Phospho (STY);X;X;X;X;X;X;X;X;X;X;X;X;X;X;X	XXXPPPPPPPPPPPPPPPXXXXXXXXXXXXX	GEPGRPALYFCGS(1)IR	13	3	0.71062			5928;5929	5928	32075	44078	52570	23138	23149	19628
sp|O43598|DNPH1_HUMAN	169	sp|O43598|DNPH1_HUMAN	sp|O43598|DNPH1_HUMAN	>sp|O43598|DNPH1_HUMAN 2'-deoxynucleoside 5'-phosphate N-hydrolase 1 OS=Homo sapiens OX=9606 GN=DNPH1 PE=1 SV=1	0.432834	0.00153001	41.539		S	LDRYFEADPPGQVAASPDPTT__________	X;X;X;X;X;X;X;X;X;X;X;X;X;X;X;Phospho (STY);X;X;X;X;X;X;X;X;X;X;X;X;X;X;X	XXXPPPPPPPPPPPPPPPPPPXXXXXXXXXX	YFEADPPGQVAAS(0.433)PDPT(0.284)T(0.284)	13	3	-0.35163				20545	0	0	0	0	0	0
sp|O43665|RGS10_HUMAN	10	sp|O43665|RGS10_HUMAN	sp|O43665|RGS10_HUMAN	>sp|O43665|RGS10_HUMAN Regulator of G-protein signaling 10 OS=Homo sapiens OX=9606 GN=RGS10 PE=1 SV=3	0.989658	0.0166383	12.105	1	S	______MFNRAVSRLSRKRPPSDIHDSDGSS	X;X;X;X;X;X;X;X;X;X;X;X;X;X;X;Phospho (STY);X;X;X;X;X;X;X;X;X;X;X;X;X;X;X	XXXXXXXXXXPPPPPPPXXXXXXXXXXXXXX	AVS(0.01)RLS(0.99)R	6	3	0.26598			2283	2283	4000.5	9119.1	5732.8	2941.4	3315.6	3817.2
sp|O43719|HTSF1_HUMAN	624	sp|O43719|HTSF1_HUMAN	sp|O43719|HTSF1_HUMAN	>sp|O43719|HTSF1_HUMAN HIV Tat-specific factor 1 OS=Homo sapiens OX=9606 GN=HTATSF1 PE=1 SV=1	1	6.49e-62	172.65	1;2	S	KVLDEEGSEREFDEDSDEKEEEEDTYEKVFD	X;X;X;X;X;X;X;Phospho (STY);X;X;X;X;X;X;X;Phospho (STY);X;X;X;X;X;X;X;X;X;X;X;X;X;X;X	XPPPPPPPPPPPPPPPPPPPPPPPPPPPXXX	VLDEEGS(1)EREFDEDS(1)DEKEEEEDTYEK	15	4	-0.21106			3783;19912;19913	19912	26680	88636	36633	20295	21608	16145
sp|O43719|HTSF1_HUMAN	498	sp|O43719|HTSF1_HUMAN	sp|O43719|HTSF1_HUMAN	>sp|O43719|HTSF1_HUMAN HIV Tat-specific factor 1 OS=Homo sapiens OX=9606 GN=HTATSF1 PE=1 SV=1	0.999866	4.62e-05	69.153	1	S	KESEEGNPVRGSEEDSPKKESKKKTLKNDCE	X;X;X;X;X;X;X;X;X;X;X;X;X;X;X;Phospho (STY);X;X;X;X;X;X;X;X;X;X;X;X;X;X;X	XPPPPPPPPPPPPPPPPPPPPPXXXXXXXXX	GSEEDS(1)PKK	6	3	0.26355			4787;6934;6935;6936;6937;6938;6939;6940;6941;6942;6943	6937	118600	401850	195340	92725	95197	79021
sp|O43719|HTSF1_HUMAN	452	sp|O43719|HTSF1_HUMAN	sp|O43719|HTSF1_HUMAN	>sp|O43719|HTSF1_HUMAN HIV Tat-specific factor 1 OS=Homo sapiens OX=9606 GN=HTATSF1 PE=1 SV=1	0.499978	1.65e-08	63.274	1	S	GGEFEEGASENNAKESSPEKEAEEGCPEKES	X;X;X;X;X;X;X;X;X;X;X;X;X;X;X;Phospho (STY);X;X;X;X;X;X;X;X;X;X;X;X;X;X;X	XXXXXXXXXXXXXXPPPPPPPPPPPPPPPPP	ES(0.5)S(0.5)PEKEAEEGCPEKESEEGCPK	2	4	-0.39309			4905	4905	12023	54150	28740	9868	13119	10189
sp|O43719|HTSF1_HUMAN	453	sp|O43719|HTSF1_HUMAN	sp|O43719|HTSF1_HUMAN	>sp|O43719|HTSF1_HUMAN HIV Tat-specific factor 1 OS=Homo sapiens OX=9606 GN=HTATSF1 PE=1 SV=1	0.851651	1.51e-21	105.72	1	S	GEFEEGASENNAKESSPEKEAEEGCPEKESE	X;X;X;X;X;X;X;X;X;X;X;X;X;X;X;Phospho (STY);X;X;X;X;X;X;X;X;X;X;X;X;X;X;X	XXXXXXXXXXXXXPPPPPPPPPPPPPPPPPP	ES(0.148)S(0.852)PEKEAEEGCPEKESEEGCPK	3	4	-1.2806			4904;4905	4904	21039	93287	46354	18284	20895	17488
sp|O43719|HTSF1_HUMAN	479	sp|O43719|HTSF1_HUMAN	sp|O43719|HTSF1_HUMAN	>sp|O43719|HTSF1_HUMAN HIV Tat-specific factor 1 OS=Homo sapiens OX=9606 GN=HTATSF1 PE=1 SV=1	0.972489	2.94e-07	59.048	1	S	EKESEEGCPKRGFEGSCSQKESEEGNPVRGS	X;X;X;X;X;X;X;X;X;X;X;X;X;X;X;Phospho (STY);X;X;X;X;X;X;X;X;X;X;X;X;X;X;X	XXXXXXXXXXPPPPPPPPPPPPPPPPPPPXX	RGFEGS(0.972)CS(0.028)QK	6	3	0.023735			13404	13404	8715.5	33405	14957	6500.8	6956.2	5804.5
sp|O43719|HTSF1_HUMAN	481	sp|O43719|HTSF1_HUMAN	sp|O43719|HTSF1_HUMAN	>sp|O43719|HTSF1_HUMAN HIV Tat-specific factor 1 OS=Homo sapiens OX=9606 GN=HTATSF1 PE=1 SV=1	0.49984	2.94e-07	59.048		S	ESEEGCPKRGFEGSCSQKESEEGNPVRGSEE	X;X;X;X;X;X;X;X;X;X;X;X;X;X;X;X;X;X;X;X;X;X;X;X;X;X;X;X;X;X;X	XXXXXXXXXXXXXXXXXXXXXXXXXXXXXXX	RGFEGS(0.5)CS(0.5)QKESEEGNPVR	8	4	1.3772				13405	0	0	0	0	0	0
sp|O43719|HTSF1_HUMAN	387	sp|O43719|HTSF1_HUMAN	sp|O43719|HTSF1_HUMAN	>sp|O43719|HTSF1_HUMAN HIV Tat-specific factor 1 OS=Homo sapiens OX=9606 GN=HTATSF1 PE=1 SV=1	0.997873	6.22e-09	79.484	1	S	FLNAPEANRGLRRSDSVSASERAGPSRARHF	X;X;X;X;X;X;X;X;X;X;X;X;X;X;X;Phospho (STY);X;X;X;X;X;X;X;X;X;X;X;X;X;X;X	XXXXXXXXXXXXPPPPPPPPPPXXXXXXXXX	RSDS(0.998)VS(0.002)ASER	4	3	0.29578			14286;14287;14288;14289	14289	11143	30143	15807	6517.3	5827.7	5986.1
sp|O43719|HTSF1_HUMAN	642	sp|O43719|HTSF1_HUMAN	sp|O43719|HTSF1_HUMAN	>sp|O43719|HTSF1_HUMAN HIV Tat-specific factor 1 OS=Homo sapiens OX=9606 GN=HTATSF1 PE=1 SV=1	1	1.76e-101	234.14	1	S	KEEEEDTYEKVFDDESDEKEDEEYADEKGLE	X;X;X;X;X;X;X;X;X;X;X;X;X;X;X;Phospho (STY);X;X;X;X;X;X;X;X;X;X;X;X;X;X;X	XXXXXXXXXXPPPPPPPPPPPPPPPPPPPPP	VFDDES(1)DEKEDEEYADEK	6	3	0.26674			19626;19627;19628;19629;19630;19631;19632	19628	161180	535620	188800	121640	109300	86167
sp|O43719|HTSF1_HUMAN	616	sp|O43719|HTSF1_HUMAN	sp|O43719|HTSF1_HUMAN	>sp|O43719|HTSF1_HUMAN HIV Tat-specific factor 1 OS=Homo sapiens OX=9606 GN=HTATSF1 PE=1 SV=1	1	6.49e-62	172.65	2	S	EFEDDGSEKVLDEEGSEREFDEDSDEKEEEE	X;X;X;X;X;X;X;X;X;X;X;X;X;X;X;Phospho (STY);X;X;X;X;X;X;X;Phospho (STY);X;X;X;X;X;X;X	XXXXXXXXXPPPPPPPPPPPPPPPPPPPPPP	VLDEEGS(1)EREFDEDS(1)DEKEEEEDTYEK	7	4	1.2961			19912;19913	19913	18285	55486	21938	12739	13972	9848.6
sp|O43741|AAKB2_HUMAN	183	sp|O43741|AAKB2_HUMAN	sp|O43741|AAKB2_HUMAN	>sp|O43741|AAKB2_HUMAN 5'-AMP-activated protein kinase subunit beta-2 OS=Homo sapiens OX=9606 GN=PRKAB2 PE=1 SV=1	0.662797	1.24e-20	122.65	1	S	LDSMESSETSCRDLSSSPPGPYGQEMYAFRS	X;X;X;X;X;X;X;X;X;X;X;X;X;X;X;Phospho (STY);X;X;X;X;X;X;X;X;X;Oxidation (M);X;X;X;X;X	XXXXXXXXXXXXPPPPPPPPPPPPPPPPPPX	DLS(0.195)S(0.663)S(0.142)PPGPYGQEMYAFR	4	3	0.065301			2845	2845	13396	14393	11927	11004	9522.1	8926.8
sp|O43741|AAKB2_HUMAN	184	sp|O43741|AAKB2_HUMAN	sp|O43741|AAKB2_HUMAN	>sp|O43741|AAKB2_HUMAN 5'-AMP-activated protein kinase subunit beta-2 OS=Homo sapiens OX=9606 GN=PRKAB2 PE=1 SV=1	0.468351	1.24e-20	122.65		S	DSMESSETSCRDLSSSPPGPYGQEMYAFRSE	X;X;X;X;X;X;X;X;X;X;X;X;X;X;X;X;X;X;X;X;X;X;X;X;X;X;X;X;X;X;X	XXXXXXXXXXXXXXXXXXXXXXXXXXXXXXX	DLS(0.063)S(0.468)S(0.468)PPGPYGQEMYAFR	5	3	-0.25614				2846	0	0	0	0	0	0
sp|O43741|AAKB2_HUMAN	108	sp|O43741|AAKB2_HUMAN	sp|O43741|AAKB2_HUMAN	>sp|O43741|AAKB2_HUMAN 5'-AMP-activated protein kinase subunit beta-2 OS=Homo sapiens OX=9606 GN=PRKAB2 PE=1 SV=1	0.999999	2.75e-05	54.135	1	S	SGSFNNWSTKIPLIKSHNDFVAILDLPEGEH	X;X;X;X;X;X;X;X;X;X;X;X;X;X;X;Phospho (STY);X;X;X;X;X;X;X;X;X;X;X;X;X;X;X	XXXXXXXXXXXXXXXPPPPPPPPPPPPPPPP	S(1)HNDFVAILDLPEGEHQYK	1	4	0.25359			15626;15627	15627	13061	18320	14346	11506	10405	7789.4
sp|O43765|SGTA_HUMAN	77	sp|O43765|SGTA_HUMAN	sp|O43765|SGTA_HUMAN	>sp|O43765|SGTA_HUMAN Small glutamine-rich tetratricopeptide repeat-containing protein alpha OS=Homo sapiens OX=9606 GN=SGTA PE=1 SV=1	1	0.000151038	47.138	1;2	S	FEAAATGKEMPQDLRSPARTPPSEEDSAEAE	X;X;X;X;X;X;X;X;X;Oxidation (M);X;X;X;X;X;Phospho (STY);X;X;X;Phospho (STY);X;X;X;X;X;X;X;X;X;X;X	XXXXXXXXPPPPPPPPPPPPPPPPPPPPPPP	EMPQDLRS(1)PAR	8	3	0.091246			4454;4455;4456;4457;4458;4459	4454	47490	64325	52108	45215	36014	34755
sp|O43765|SGTA_HUMAN	305	sp|O43765|SGTA_HUMAN	sp|O43765|SGTA_HUMAN	>sp|O43765|SGTA_HUMAN Small glutamine-rich tetratricopeptide repeat-containing protein alpha OS=Homo sapiens OX=9606 GN=SGTA PE=1 SV=1	0.498969	0.000246004	91.138		S	ELIEQLRSQIRSRTPSASNDDQQE_______	X;X;X;X;X;X;X;X;X;X;X;X;X;X;X;X;X;X;X;X;X;X;X;X;X;X;X;X;X;X;X	XXXXXXXXXXXXXXXXXXXXXXXXXXXXXXX	T(0.499)PS(0.499)AS(0.002)NDDQQE	3	2	-0.34834				18686	0	0	0	0	0	0
sp|O43768|ENSA_HUMAN	109	sp|O43768|ENSA_HUMAN	sp|O43768|ENSA_HUMAN	>sp|O43768|ENSA_HUMAN Alpha-endosulfine OS=Homo sapiens OX=9606 GN=ENSA PE=1 SV=1	0.715513	0.00226102	40.666	1	S	GDHIPTPQDLPQRKSSLVTSKLAGGQVE___	X;X;X;X;X;X;X;X;X;X;X;X;X;X;X;Phospho (STY);X;X;X;X;X;X;X;X;X;X;X;X;X;X;X	XXXXXXXXXXXXXPPPPPPPPXXXXXXXXXX	KS(0.19)S(0.716)LVT(0.07)S(0.024)K	3	3	0.033153			9771	9771	21917	26706	25828	8427	9017.4	10512
sp|O43815|STRN_HUMAN	245	sp|O43815|STRN_HUMAN	sp|O43815|STRN_HUMAN	>sp|O43815|STRN_HUMAN Striatin OS=Homo sapiens OX=9606 GN=STRN PE=1 SV=4	1	2.35e-61	186.28	1	S	VLDNFKFLESAAADFSDEDEDDDVDGREKSV	X;X;X;X;X;X;X;X;X;X;X;X;X;X;X;Phospho (STY);X;X;X;X;X;X;X;X;X;X;X;X;X;X;X	XXXXXXPPPPPPPPPPPPPPPPPPPPPPPXX	FLESAAADFS(1)DEDEDDDVDGREK	10	4	1.9344			5405;5406;5407;5408;5409;5410	5410	91532	79065	58638	70145	58052	53471
sp|O43847|NRDC_HUMAN	94	sp|O43847|NRDC_HUMAN	sp|O43847|NRDC_HUMAN	>sp|O43847|NRDC_HUMAN Nardilysin OS=Homo sapiens OX=9606 GN=NRDC PE=1 SV=3	0.991196	4.24e-06	74.354	1	S	ARLGADESEEEGRRGSLSNAGDPEIVKSPSD	X;X;X;X;X;X;X;X;X;X;X;X;X;X;X;Phospho (STY);X;X;X;X;X;X;X;X;X;X;X;X;X;X;X	XXXXXXXXXXXXXPPPPPPPPPPPPPPXXXX	RGS(0.991)LS(0.009)NAGDPEIVK	3	2	0.19496			13485;13486;13487;13488;13489	13487	93496	112110	102970	66776	53377	54809
sp|O43852|CALU_HUMAN	44	sp|O43852|CALU_HUMAN	sp|O43852|CALU_HUMAN	>sp|O43852|CALU_HUMAN Calumenin OS=Homo sapiens OX=9606 GN=CALU PE=1 SV=2	1	6.68e-32	131.42	1;2	S	HHEPQLSDKVHNDAQSFDYDHDAFLGAEEAK	X;X;X;X;X;X;X;X;X;X;X;X;X;X;X;Phospho (STY);X;X;Phospho (STY);X;X;X;X;X;X;X;X;X;X;X;X	XXXXXXXXXPPPPPPPPPPPPPPPPPPPPPP	VHNDAQS(1)FDY(1)DHDAFLGAEEAK	7	3	-2.2137			19750;19751;19752;19753;19754;19755;19756;19757	19757	82243	231730	115400	72302	63546	52000
sp|O43896|KIF1C_HUMAN	674	sp|O43896|KIF1C_HUMAN	sp|O43896|KIF1C_HUMAN	>sp|O43896|KIF1C_HUMAN Kinesin-like protein KIF1C OS=Homo sapiens OX=9606 GN=KIF1C PE=1 SV=3	0.999283	7.67e-09	87.564	2	S	EEADLLLEQQRLYADSDSGDDSDKRSCEESW	X;X;X;X;X;X;X;X;X;X;X;X;X;X;X;Phospho (STY);X;Phospho (STY);X;X;X;X;X;X;X;X;X;X;X;X;X	XXXXXXXXXXXPPPPPPPPPPPPPPXXXXXX	LYADS(0.999)DS(0.963)GDDS(0.038)DKR	5	3	0.19042			11322;11323;11324;11325	11322	107280	96915	83169	79000	58628	58573
sp|O43896|KIF1C_HUMAN	676	sp|O43896|KIF1C_HUMAN	sp|O43896|KIF1C_HUMAN	>sp|O43896|KIF1C_HUMAN Kinesin-like protein KIF1C OS=Homo sapiens OX=9606 GN=KIF1C PE=1 SV=3	0.989241	7.67e-09	87.564	2	S	ADLLLEQQRLYADSDSGDDSDKRSCEESWRL	X;X;X;X;X;X;X;X;X;X;X;X;X;Phospho (STY);X;Phospho (STY);X;X;X;X;X;X;X;X;X;X;X;X;X;X;X	XXXXXXXXXPPPPPPPPPPPPPPXXXXXXXX	LYADS(0.997)DS(0.989)GDDS(0.014)DKR	7	3	0.79921			11322;11323;11324;11325	11323	107280	96915	83169	79000	58628	58573
sp|O43896|KIF1C_HUMAN	680	sp|O43896|KIF1C_HUMAN	sp|O43896|KIF1C_HUMAN	>sp|O43896|KIF1C_HUMAN Kinesin-like protein KIF1C OS=Homo sapiens OX=9606 GN=KIF1C PE=1 SV=3	0.627149	8.02e-09	82.692	2	S	LEQQRLYADSDSGDDSDKRSCEESWRLISSL	X;X;X;X;X;X;X;X;X;X;X;X;X;X;X;X;X;X;X;X;X;X;X;X;X;X;X;X;X;X;X	XXXXXXXXXXXXXXXXXXXXXXXXXXXXXXX	LYADS(0.746)DS(0.627)GDDS(0.627)DKR	11	3	0.3289			11324	11324	33398	25763	22983	24400	16870	17479
sp|O60216|RAD21_HUMAN	175	sp|O60216|RAD21_HUMAN	sp|O60216|RAD21_HUMAN	>sp|O60216|RAD21_HUMAN Double-strand-break repair protein rad21 homolog OS=Homo sapiens OX=9606 GN=RAD21 PE=1 SV=2	1	8.83e-31	114.36	1	S	FGDFGMDDREIMREGSAFEDDDMLVSTTTSN	X;X;X;X;X;X;X;X;X;X;X;X;X;X;X;Phospho (STY);X;X;X;X;X;X;X;X;X;X;X;X;X;X;X	XXXXXXXXXXXXXPPPPPPPPPPPPPPPPPP	EGS(1)AFEDDDMLVSTTTSNLLLESEQSTSNLNEK	3	4	1.0304			4038;4039	4038	6329.5	10107	6717.5	5058.5	5706.7	4615.2
sp|O60231|DHX16_HUMAN	160	sp|O60231|DHX16_HUMAN	sp|O60231|DHX16_HUMAN	>sp|O60231|DHX16_HUMAN Pre-mRNA-splicing factor ATP-dependent RNA helicase DHX16 OS=Homo sapiens OX=9606 GN=DHX16 PE=1 SV=2	0.99996	1.4e-22	143.62	1	S	KKKTGGSKQQTEKPESEDEWERTERERLQDL	X;X;X;X;X;X;X;X;X;X;X;X;X;X;X;Phospho (STY);X;X;X;X;X;X;X;X;X;X;X;X;X;X;X	XXXXXXXXPPPPPPPPPPPPPPXXXXXXXXX	QQTEKPES(1)EDEWER	8	3	0.0019039			12780;12781;12782	12781	53218	93320	68337	39564	31992	31773
sp|O60256|KPRB_HUMAN	227	sp|O60256|KPRB_HUMAN	sp|O60256|KPRB_HUMAN	>sp|O60256|KPRB_HUMAN Phosphoribosyl pyrophosphate synthase-associated protein 2 OS=Homo sapiens OX=9606 GN=PRPSAP2 PE=1 SV=1	0.999285	4.93e-34	129.21	1	S	GEAQDAESDLVDGRHSPPMVRSVAAIHPSLE	X;X;X;X;X;X;X;X;X;X;X;X;X;X;X;Phospho (STY);X;X;X;X;X;X;X;X;X;X;X;X;X;X;X	PPPPPPPPPPPPPPPPPPPPPXXXXXXXXXX	LGIAVIHGEAQDAES(0.001)DLVDGRHS(0.999)PPMVR	23	5	-0.43642			10421;10422;10423;10424	10424	22066	31899	26756	18977	17729	16590
sp|O60264|SMCA5_HUMAN	66	sp|O60264|SMCA5_HUMAN	sp|O60264|SMCA5_HUMAN	>sp|O60264|SMCA5_HUMAN SWI/SNF-related matrix-associated actin-dependent regulator of chromatin subfamily A member 5 OS=Homo sapiens OX=9606 GN=SMARCA5 PE=1 SV=1	1	1.82e-27	102.61	1	S	AGPADAEMEEIFDDASPGKQKEIQEPDPTYE	X;X;X;X;X;X;X;X;X;X;X;X;X;X;X;Phospho (STY);X;X;X;X;X;X;X;X;X;X;X;X;X;X;X	PPPPPPPPPPPPPPPPPPPPPXXXXXXXXXX	GGPEGVAAQAVASAASAGPADAEMEEIFDDAS(1)PGKQK	32	5	-0.081566			6063;6064;6065;6066;6067;6068;6069;6070;6071	6070	38061	53138	44693	31097	27332	24784
sp|O60264|SMCA5_HUMAN	116	sp|O60264|SMCA5_HUMAN	sp|O60264|SMCA5_HUMAN	>sp|O60264|SMCA5_HUMAN SWI/SNF-related matrix-associated actin-dependent regulator of chromatin subfamily A member 5 OS=Homo sapiens OX=9606 GN=SMARCA5 PE=1 SV=1	0.648553	0.00938217	52.526	1	S	LFAHFIQPAAQKTPTSPLKMKPGRPRIKKDE	X;X;X;X;X;X;X;X;X;X;X;X;X;X;X;Phospho (STY);X;X;X;X;X;X;X;X;X;X;X;X;X;X;X	XXXXXXXXXXXXPPPPPPPXXXXXXXXXXXX	T(0.212)PT(0.14)S(0.649)PLK	4	2	0.11192			18792;18793	18792	25321	47276	40782	19630	23286	21661
sp|O60268|K0513_HUMAN	72	sp|O60268|K0513_HUMAN	sp|O60268|K0513_HUMAN	>sp|O60268|K0513_HUMAN Uncharacterized protein KIAA0513 OS=Homo sapiens OX=9606 GN=KIAA0513 PE=1 SV=1	0.295809	0.000412456	36.671		S	MGESPSHPSWDQDRRSSSNESFSSNQSTEST	X;X;X;X;X;X;X;X;X;X;X;X;X;X;X;Phospho (STY);X;X;X;X;X;X;X;X;X;X;X;X;X;X;X	XXXXXXXXXXXXXXPPPPPPPPPPPPPPPPP	RS(0.296)S(0.296)S(0.296)NES(0.035)FS(0.035)S(0.035)NQS(0.006)T(0.003)ESTQDEETLALR	2	3	-0.38307				14463	0	0	0	0	0	0
sp|O60268|K0513_HUMAN	73	sp|O60268|K0513_HUMAN	sp|O60268|K0513_HUMAN	>sp|O60268|K0513_HUMAN Uncharacterized protein KIAA0513 OS=Homo sapiens OX=9606 GN=KIAA0513 PE=1 SV=1	0.295809	0.000412456	36.671		S	GESPSHPSWDQDRRSSSNESFSSNQSTESTQ	X;X;X;X;X;X;X;X;X;X;X;X;X;X;X;X;X;X;X;X;X;X;X;X;X;X;X;X;X;X;X	XXXXXXXXXXXXXXXXXXXXXXXXXXXXXXX	RS(0.296)S(0.296)S(0.296)NES(0.035)FS(0.035)S(0.035)NQS(0.006)T(0.003)ESTQDEETLALR	3	3	-0.38307				14463	0	0	0	0	0	0
sp|O60268|K0513_HUMAN	74	sp|O60268|K0513_HUMAN	sp|O60268|K0513_HUMAN	>sp|O60268|K0513_HUMAN Uncharacterized protein KIAA0513 OS=Homo sapiens OX=9606 GN=KIAA0513 PE=1 SV=1	0.295809	0.000412456	36.671		S	ESPSHPSWDQDRRSSSNESFSSNQSTESTQD	X;X;X;X;X;X;X;X;X;X;X;X;X;X;X;X;X;X;X;X;X;X;X;X;X;X;X;X;X;X;X	XXXXXXXXXXXXXXXXXXXXXXXXXXXXXXX	RS(0.296)S(0.296)S(0.296)NES(0.035)FS(0.035)S(0.035)NQS(0.006)T(0.003)ESTQDEETLALR	4	3	-0.38307				14463	0	0	0	0	0	0
sp|O60271|JIP4_HUMAN	364	sp|O60271|JIP4_HUMAN	sp|O60271|JIP4_HUMAN	>sp|O60271|JIP4_HUMAN C-Jun-amino-terminal kinase-interacting protein 4 OS=Homo sapiens OX=9606 GN=SPAG9 PE=1 SV=4	0.490855	0.00995607	26.535		S	PELDMDKDLSGYKGSSTPTKGIENKAFDRNT	X;X;X;X;X;X;X;X;X;X;X;X;X;X;X;Phospho (STY);X;X;X;X;X;X;X;X;X;X;X;X;X;X;X	XXXXXXXXXXXXXPPPPPPPXXXXXXXXXXX	GS(0.017)S(0.491)T(0.491)PT(0.001)K	3	3	0.56078				7229	0	0	0	0	0	0
sp|O60271|JIP4_HUMAN	728	sp|O60271|JIP4_HUMAN	sp|O60271|JIP4_HUMAN	>sp|O60271|JIP4_HUMAN C-Jun-amino-terminal kinase-interacting protein 4 OS=Homo sapiens OX=9606 GN=SPAG9 PE=1 SV=4	0.546299	1.05e-05	58.569	1	S	YKDVAGLDTEGSKQRSASQSSLDKLDQELKE	X;X;X;X;X;X;X;X;X;X;X;X;X;X;X;Phospho (STY);X;X;X;X;X;X;X;X;X;X;X;X;X;X;X	XXXXXXXXXXXXXXXPPPPPPPPPPPPPPPX	S(0.546)AS(0.448)QS(0.002)S(0.003)LDKLDQELK	1	3	0.90378			14864	14864	28300	49143	36254	21159	18312	17037
sp|O60271|JIP4_HUMAN	730	sp|O60271|JIP4_HUMAN	sp|O60271|JIP4_HUMAN	>sp|O60271|JIP4_HUMAN C-Jun-amino-terminal kinase-interacting protein 4 OS=Homo sapiens OX=9606 GN=SPAG9 PE=1 SV=4	0.96679	2.03e-23	121.85	1;2	S	DVAGLDTEGSKQRSASQSSLDKLDQELKEQQ	X;X;X;X;X;X;X;X;X;X;X;X;X;X;X;Phospho (STY);X;Phospho (STY);Phospho (STY);X;X;X;X;X;X;X;X;X;X;X;X	XXXXXXXXXXXXXPPPPPPPPPPPPPPPPPP	S(0.002)AS(0.967)QS(0.012)S(0.019)LDKLDQELK	3	3	-0.1786			14865;14866;14868;14875;14877;14879;14880;14881	14866	143730	305000	189490	114610	110400	103730
sp|O60271|JIP4_HUMAN	732	sp|O60271|JIP4_HUMAN	sp|O60271|JIP4_HUMAN	>sp|O60271|JIP4_HUMAN C-Jun-amino-terminal kinase-interacting protein 4 OS=Homo sapiens OX=9606 GN=SPAG9 PE=1 SV=4	0.976122	6.88e-35	171.57	1;2	S	AGLDTEGSKQRSASQSSLDKLDQELKEQQKE	X;X;X;X;X;X;X;X;X;X;X;X;X;Phospho (STY);X;Phospho (STY);Phospho (STY);X;X;X;X;X;X;X;X;X;X;X;X;X;X	XXXXXXXXXXXPPPPPPPPPPPPPPPPPPPX	S(0.003)AS(0.052)QS(0.976)S(0.969)LDKLDQELKEQQK	5	3	1.7527			14863;14867;14868;14869;14870;14871;14872;14876;14878;14882	14882	269980	562860	325500	196530	179020	171240
sp|O60271|JIP4_HUMAN	733	sp|O60271|JIP4_HUMAN	sp|O60271|JIP4_HUMAN	>sp|O60271|JIP4_HUMAN C-Jun-amino-terminal kinase-interacting protein 4 OS=Homo sapiens OX=9606 GN=SPAG9 PE=1 SV=4	0.99387	6.88e-35	171.57	2	S	GLDTEGSKQRSASQSSLDKLDQELKEQQKEL	X;X;X;X;X;X;X;X;X;X;X;X;Phospho (STY);X;Phospho (STY);Phospho (STY);X;X;X;X;X;X;X;X;X;X;X;X;X;X;X	XXXXXXXXXXPPPPPPPPPPPPPPPPPPPXX	S(0.004)AS(0.172)QS(0.83)S(0.994)LDKLDQELK	6	3	0.44467			14867;14869;14870;14871;14872;14875;14876;14877;14878;14879;14880;14881;14882	14871	300740	690910	382620	223640	215610	208840
sp|O60292|SI1L3_HUMAN	170	sp|O60292|SI1L3_HUMAN	sp|O60292|SI1L3_HUMAN	>sp|O60292|SI1L3_HUMAN Signal-induced proliferation-associated 1-like protein 3 OS=Homo sapiens OX=9606 GN=SIPA1L3 PE=1 SV=3	0.355737	3.86e-10	77.689		S	WPRSPGRAFLPLRHRSSSEITLSECDAEDAG	X;X;X;X;X;X;X;X;X;X;X;X;X;X;X;Phospho (STY);X;X;X;X;X;X;X;X;X;X;X;X;X;X;X	XXXXXXXXXXXXXXXPPPPPPPPPPPPPPPP	S(0.356)S(0.356)S(0.288)EITLSECDAEDAGEPR	1	3	-0.21734				17355	0	0	0	0	0	0
sp|O60292|SI1L3_HUMAN	171	sp|O60292|SI1L3_HUMAN	sp|O60292|SI1L3_HUMAN	>sp|O60292|SI1L3_HUMAN Signal-induced proliferation-associated 1-like protein 3 OS=Homo sapiens OX=9606 GN=SIPA1L3 PE=1 SV=3	0.355737	3.86e-10	77.689		S	PRSPGRAFLPLRHRSSSEITLSECDAEDAGE	X;X;X;X;X;X;X;X;X;X;X;X;X;X;X;X;X;X;X;X;X;X;X;X;X;X;X;X;X;X;X	XXXXXXXXXXXXXXXXXXXXXXXXXXXXXXX	S(0.356)S(0.356)S(0.288)EITLSECDAEDAGEPR	2	3	-0.21734				17355	0	0	0	0	0	0
sp|O60318|GANP_HUMAN	527	sp|O60318|GANP_HUMAN	sp|O60318|GANP_HUMAN	>sp|O60318|GANP_HUMAN Germinal-center associated nuclear protein OS=Homo sapiens OX=9606 GN=MCM3AP PE=1 SV=2	0.892406	1.28e-06	59.621	1	S	KPFSLKEKKPGDGEVSPSTEDAPFQHSPLGK	X;X;X;X;X;X;X;X;X;X;X;X;X;X;X;Phospho (STY);X;X;X;X;X;X;X;X;X;X;X;X;X;X;X	XXXXXXXXPPPPPPPPPPPPPPPPPPPPPPP	KPGDGEVS(0.892)PS(0.054)T(0.054)EDAPFQHSPLGK	8	4	0.84654			9424	9424	10419	24123	16531	9239.4	8833.3	8816.6
sp|O60333|KIF1B_HUMAN	1487	sp|O60333|KIF1B_HUMAN	sp|O60333|KIF1B_HUMAN	>sp|O60333|KIF1B_HUMAN Kinesin-like protein KIF1B OS=Homo sapiens OX=9606 GN=KIF1B PE=1 SV=5	1	3.36e-06	75.373	1	S	VRGEENLAGWRPRGDSLILEHQWELEKLELL	X;X;X;X;X;X;X;X;X;X;X;X;X;X;X;Phospho (STY);X;X;X;X;X;X;X;X;X;X;X;X;X;X;X	XXXXXXXXXXXXXPPPPPPPPPPPPPPXXXX	GDS(1)LILEHQWELEK	3	3	-0.56631			5823	5823	13396	17221	16543	11514	9928.9	8916
sp|O60333|KIF1B_HUMAN	1454	sp|O60333|KIF1B_HUMAN	sp|O60333|KIF1B_HUMAN	>sp|O60333|KIF1B_HUMAN Kinesin-like protein KIF1B OS=Homo sapiens OX=9606 GN=KIF1B PE=1 SV=5	0.975216	0.00648209	49.881	1	S	TGIYELSLCKMSDTGSPGMQRRRRKILDTSV	X;X;X;X;X;X;X;X;X;X;X;X;X;X;X;Phospho (STY);X;X;X;X;X;X;X;X;X;X;X;X;X;X;X	XXXXXXXXXXPPPPPPPPPPPXXXXXXXXXX	MS(0.003)DT(0.022)GS(0.975)PGMQR	6	2	0.36573			11589	11589	8021.7	14617	11209	7542.8	6860	5580.5
sp|O60333|KIF1B_HUMAN	1057	sp|O60333|KIF1B_HUMAN	sp|O60333|KIF1B_HUMAN	>sp|O60333|KIF1B_HUMAN Kinesin-like protein KIF1B OS=Homo sapiens OX=9606 GN=KIF1B PE=1 SV=5	0.99498	0.00409003	43.63	1	S	NQSDFSSVAMTRSGLSLEELRIVEGQGQSSE	X;X;X;X;X;X;X;X;X;X;X;X;X;X;X;Phospho (STY);X;X;X;X;X;X;X;X;X;X;X;X;X;X;X	XXXXXXXXXXXXPPPPPPPPPXXXXXXXXXX	S(0.005)GLS(0.995)LEELR	4	2	1.2164			15425;15426	15425	30575	47650	35777	24440	22594	19884
sp|O60341|KDM1A_HUMAN	131	sp|O60341|KDM1A_HUMAN	sp|O60341|KDM1A_HUMAN	>sp|O60341|KDM1A_HUMAN Lysine-specific histone demethylase 1A OS=Homo sapiens OX=9606 GN=KDM1A PE=1 SV=2	0.999999	2.33e-32	115.21	2	S	AKVEYREMDESLANLSEDEYYSEEERNAKAE	X;X;X;X;X;X;X;X;X;X;X;X;X;X;X;Phospho (STY);X;X;X;X;X;Phospho (STY);X;X;X;X;X;X;X;X;X	XXXXXXPPPPPPPPPPPPPPPPPPPPXXXXX	EMDESLANLS(1)EDEYYS(1)EEER	10	2	2.5806			4401	4401	4163.7	7573.2	4591.5	2930.1	3035.3	2596.6
sp|O60341|KDM1A_HUMAN	137	sp|O60341|KDM1A_HUMAN	sp|O60341|KDM1A_HUMAN	>sp|O60341|KDM1A_HUMAN Lysine-specific histone demethylase 1A OS=Homo sapiens OX=9606 GN=KDM1A PE=1 SV=2	1	2.33e-32	115.21	2	S	EMDESLANLSEDEYYSEEERNAKAEKEKKLP	X;X;X;X;X;X;X;X;X;Phospho (STY);X;X;X;X;X;Phospho (STY);X;X;X;X;X;X;X;X;X;X;X;X;X;X;X	PPPPPPPPPPPPPPPPPPPPXXXXXXXXXXX	EMDESLANLS(1)EDEYYS(1)EEER	16	2	2.5806			4401	4401	4163.7	7573.2	4591.5	2930.1	3035.3	2596.6
sp|O60341|KDM1A_HUMAN	166	sp|O60341|KDM1A_HUMAN	sp|O60341|KDM1A_HUMAN	>sp|O60341|KDM1A_HUMAN Lysine-specific histone demethylase 1A OS=Homo sapiens OX=9606 GN=KDM1A PE=1 SV=2	0.999376	1.06e-08	55.593	1	S	LPPPPPQAPPEEENESEPEEPSGVEGAAFQS	X;X;X;X;X;X;X;X;X;X;X;X;X;X;X;Phospho (STY);X;X;X;X;X;X;X;X;X;X;X;X;X;X;X	PPPPPPPPPPPPPPPPPPPPPPPPPPPPPPP	KLPPPPPQAPPEEENES(0.999)EPEEPS(0.001)GVEGAAFQSR	17	4	-0.41943			9243;9244	9243	12454	19759	16073	11078	8965.5	6918.7
sp|O60343|TBCD4_HUMAN	591	sp|O60343|TBCD4_HUMAN	sp|O60343|TBCD4_HUMAN	>sp|O60343|TBCD4_HUMAN TBC1 domain family member 4 OS=Homo sapiens OX=9606 GN=TBC1D4 PE=1 SV=2	0.99093	0.0421918	24.536	1	S	SRGANRMRGRLGSVDSFERSNSLASEKDYSP	X;X;X;X;X;X;X;X;X;X;X;X;X;X;X;Phospho (STY);X;X;X;X;X;X;X;X;X;X;X;X;X;X;X	XXXXXXXXXXPPPPPPPPPXXXXXXXXXXXX	LGS(0.009)VDS(0.991)FER	6	2	0.6523			10509	10509	16651	21778	17035	13211	13541	11807
sp|O60353|FZD6_HUMAN	653	sp|O60353|FZD6_HUMAN	sp|O60353|FZD6_HUMAN	>sp|O60353|FZD6_HUMAN Frizzled-6 OS=Homo sapiens OX=9606 GN=FZD6 PE=1 SV=2	0.998061	0.00815253	34.315	1	S	QAGSVSESARSEGRISPKSDITDTGLAQSNN	X;X;X;X;X;X;X;X;X;X;X;X;X;X;X;Phospho (STY);X;X;X;X;X;X;X;X;X;X;X;X;X;X;X	XXXXXXXXXXPPPPPPPPXXXXXXXXXXXXX	S(0.002)EGRIS(0.998)PK	6	3	-0.51768			15159	15159	11534	13222	11985	9313.5	8876.3	7378.4
sp|O60437|PEPL_HUMAN	14	sp|O60437|PEPL_HUMAN	sp|O60437|PEPL_HUMAN	>sp|O60437|PEPL_HUMAN Periplakin OS=Homo sapiens OX=9606 GN=PPL PE=1 SV=4	0.742812	0.000296785	69.545	1	S	__MNSLFRKRNKGKYSPTVQTRSISNKELSE	X;X;X;X;X;X;X;X;X;X;X;X;X;X;X;Phospho (STY);X;X;X;X;X;X;X;X;X;X;X;X;X;X;X	XXXXXXXXXXXXPPPPPPPPPPXXXXXXXXX	GKYS(0.743)PT(0.242)VQT(0.015)R	4	3	-0.045192			6244;6245	6245	29513	45496	35061	19110	16839	14411
sp|O60437|PEPL_HUMAN	887	sp|O60437|PEPL_HUMAN	sp|O60437|PEPL_HUMAN	>sp|O60437|PEPL_HUMAN Periplakin OS=Homo sapiens OX=9606 GN=PPL PE=1 SV=4	1	0.000195545	60.08	1	S	EVEVTHETLQRNRPDSGVEEAWKIRKELDEE	X;X;X;X;X;X;X;X;X;X;X;X;X;X;X;Phospho (STY);X;X;X;X;X;X;X;X;X;X;X;X;X;X;X	XXXXXXXXXXXPPPPPPPPPPPPXXXXXXXX	NRPDS(1)GVEEAWK	5	3	0.0061761			11903;11904	11904	38950	41566	39460	30879	29225	27928
sp|O60437|PEPL_HUMAN	1657	sp|O60437|PEPL_HUMAN	sp|O60437|PEPL_HUMAN	>sp|O60437|PEPL_HUMAN Periplakin OS=Homo sapiens OX=9606 GN=PPL PE=1 SV=4	1	2.71e-05	85.574	1	S	SVAVKREQRENHLRRSIVVIHPDTGRELSPE	X;X;X;X;X;X;X;X;X;X;X;X;X;X;X;Phospho (STY);X;X;X;X;X;X;X;X;X;X;X;X;X;X;X	XXXXXXXXXXXXXXXPPPPPPPPPPPXXXXX	S(1)IVVIHPDTGR	1	3	0.31098			15745;15746;15747;15748	15745	33078	43847	41182	23346	23454	22184
sp|O60486|PLXC1_HUMAN	978	sp|O60486|PLXC1_HUMAN	sp|O60486|PLXC1_HUMAN	>sp|O60486|PLXC1_HUMAN Plexin-C1 OS=Homo sapiens OX=9606 GN=PLXNC1 PE=1 SV=1	0.999393	6.96e-20	129.6	1	S	VGVTRHKSKELSRKQSQQLELLESELRKEIR	X;X;X;X;X;X;X;X;X;X;X;X;X;X;X;Phospho (STY);X;X;X;X;X;X;X;X;X;X;X;X;X;X;X	XXXXXXXXXXXXXPPPPPPPPPPPPPPXXXX	KQS(0.999)QQLELLES(0.001)ELR	3	3	0.58874			9587;9588	9588	58682	60625	54859	36236	34591	40422
sp|O60502|OGA_HUMAN	364	sp|O60502|OGA_HUMAN	sp|O60502|OGA_HUMAN	>sp|O60502|OGA_HUMAN Protein O-GlcNAcase OS=Homo sapiens OX=9606 GN=OGA PE=1 SV=2	1	7.5e-28	130.81	1	S	EDSTVSIQIKLENEGSDEDIETDVLYSPQMA	X;X;X;X;X;X;X;X;X;X;X;X;X;X;X;Phospho (STY);X;X;X;X;X;X;X;X;X;X;X;X;X;X;X	XXXXXXXXXXPPPPPPPPPPPPPPPPPPPPP	LENEGS(1)DEDIETDVLYSPQMALK	6	3	-0.31015			10319;10320;10321;10322;10323;10324	10319	37616	45918	37068	29029	30607	24663
sp|O60504|VINEX_HUMAN	544	sp|O60504|VINEX_HUMAN	sp|O60504|VINEX_HUMAN	>sp|O60504|VINEX_HUMAN Vinexin OS=Homo sapiens OX=9606 GN=SORBS3 PE=1 SV=2	0.995874	0.000385192	50.803	1;2	S	TSPRLTAAARSARHPSSPSALRSPADPIDLG	Phospho (STY);Phospho (STY);X;X;X;X;X;X;X;X;X;X;X;X;X;Phospho (STY);Phospho (STY);X;X;X;X;X;X;X;X;X;X;X;X;X;X	XXXXXXXXXXXXXPPPPPPPPPXXXXXXXXX	HPS(0.996)S(0.963)PS(0.041)ALR	3	2	0.70894			7583;7584;7585;7586	7586	19988	32436	20378	16264	17687	12443
sp|O60504|VINEX_HUMAN	545	sp|O60504|VINEX_HUMAN	sp|O60504|VINEX_HUMAN	>sp|O60504|VINEX_HUMAN Vinexin OS=Homo sapiens OX=9606 GN=SORBS3 PE=1 SV=2	0.96285	0.0021638	39.152	2	S	SPRLTAAARSARHPSSPSALRSPADPIDLGG	Phospho (STY);X;X;X;X;X;X;X;X;X;X;X;X;X;Phospho (STY);Phospho (STY);X;X;X;X;X;X;X;X;X;X;X;X;X;X;X	XXXXXXXXXXXXPPPPPPPPPXXXXXXXXXX	HPS(0.996)S(0.963)PS(0.041)ALR	4	2	0.70894			7586	7586	6906.1	15840	8725.2	5875.3	7788.3	5546.4
sp|O60504|VINEX_HUMAN	530	sp|O60504|VINEX_HUMAN	sp|O60504|VINEX_HUMAN	>sp|O60504|VINEX_HUMAN Vinexin OS=Homo sapiens OX=9606 GN=SORBS3 PE=1 SV=2	0.929567	1.18e-17	146.03	1	S	EPRLRLCDDGPQLPTSPRLTAAARSARHPSS	X;X;X;X;X;X;X;X;X;X;X;X;X;X;X;Phospho (STY);X;X;X;X;X;X;X;X;X;X;X;X;X;Phospho (STY);Phospho (STY)	XXXXXPPPPPPPPPPPPPXXXXXXXXXXXXX	LCDDGPQLPT(0.07)S(0.93)PR	11	3	0.27953			10107;10108;10109;10110;10111;10112	10110	93957	101050	82887	74927	102240	79190
sp|O60504|VINEX_HUMAN	302	sp|O60504|VINEX_HUMAN	sp|O60504|VINEX_HUMAN	>sp|O60504|VINEX_HUMAN Vinexin OS=Homo sapiens OX=9606 GN=SORBS3 PE=1 SV=2	0.992326	0.004731	36.67	2	S	DKDLRAIETRLPSPKSSPAPRRAPEQRPPAG	X;X;X;X;X;X;X;X;X;X;X;X;X;X;X;Phospho (STY);Phospho (STY);X;X;X;X;X;X;X;X;X;X;X;X;X;X	XXXXXXXXXXPPPPPPPPPPPXXXXXXXXXX	LPS(0.017)PKS(0.992)S(0.991)PAPR	6	3	-0.86713			10896	10896	16135	16600	12736	12544	11694	10537
sp|O60504|VINEX_HUMAN	303	sp|O60504|VINEX_HUMAN	sp|O60504|VINEX_HUMAN	>sp|O60504|VINEX_HUMAN Vinexin OS=Homo sapiens OX=9606 GN=SORBS3 PE=1 SV=2	0.990548	0.004731	36.67	2	S	KDLRAIETRLPSPKSSPAPRRAPEQRPPAGP	X;X;X;X;X;X;X;X;X;X;X;X;X;X;Phospho (STY);Phospho (STY);X;X;X;X;X;X;X;X;X;X;X;X;X;X;X	XXXXXXXXXPPPPPPPPPPPXXXXXXXXXXX	LPS(0.017)PKS(0.992)S(0.991)PAPR	7	3	-0.86713			10896	10896	16135	16600	12736	12544	11694	10537
sp|O60504|VINEX_HUMAN	348	sp|O60504|VINEX_HUMAN	sp|O60504|VINEX_HUMAN	>sp|O60504|VINEX_HUMAN Vinexin OS=Homo sapiens OX=9606 GN=SORBS3 PE=1 SV=2	1	0.000787154	56.757	1	S	GSARSLSPHKMADGGSPFLGRRDFVYPSSTR	X;X;X;X;X;X;X;X;X;X;X;X;X;X;X;Phospho (STY);X;X;X;X;X;X;X;X;X;X;X;X;X;X;X	XXXXXXXXXXPPPPPPPPPPPXXXXXXXXXX	MADGGS(1)PFLGR	6	2	-0.35656			11335;11336	11336	27792	34317	28948	22298	19387	17180
sp|O60524|NEMF_HUMAN	417	sp|O60524|NEMF_HUMAN	sp|O60524|NEMF_HUMAN	>sp|O60524|NEMF_HUMAN Nuclear export mediator factor NEMF OS=Homo sapiens OX=9606 GN=NEMF PE=1 SV=4	1	1.77e-31	140.86	1	S	QTNHVTMLLRNPYLLSEEEDDDVDGDVNVEK	X;X;X;X;X;X;X;X;X;X;X;X;X;X;X;Phospho (STY);X;X;X;X;X;X;X;X;X;X;X;X;X;X;X	XXXXXXXXXXPPPPPPPPPPPPPPPPPPPPP	NPYLLS(1)EEEDDDVDGDVNVEK	6	3	-1.0618			11885;11886	11885	36207	41360	31339	24872	21296	19941
sp|O60583|CCNT2_HUMAN	536	sp|O60583|CCNT2_HUMAN	sp|O60583|CCNT2_HUMAN	>sp|O60583|CCNT2_HUMAN Cyclin-T2 OS=Homo sapiens OX=9606 GN=CCNT2 PE=1 SV=2	0.516076	0.00135129	48.474	1	S	EELKMKIKVSSSERHSSSDEGSGKSKHSSPH	X;X;X;X;X;X;X;X;X;X;X;X;X;X;X;Phospho (STY);X;X;X;X;X;X;X;X;X;X;X;X;X;X;X	XXXXXXXXXXXXXXPPPPPPPPPPXXXXXXX	HS(0.516)S(0.413)S(0.071)DEGSGK	2	3	-0.78077			7638	7638	3659.4	12923	6223	2928.4	2376.9	2076.9
sp|O60583|CCNT2_HUMAN	537	sp|O60583|CCNT2_HUMAN	sp|O60583|CCNT2_HUMAN	>sp|O60583|CCNT2_HUMAN Cyclin-T2 OS=Homo sapiens OX=9606 GN=CCNT2 PE=1 SV=2	0.887267	0.0293389	32.075	1	S	ELKMKIKVSSSERHSSSDEGSGKSKHSSPHI	X;X;X;X;X;X;X;X;X;X;X;X;X;X;X;Phospho (STY);X;X;X;X;X;X;X;X;X;X;X;X;X;X;X	XXXXXXXXXXXXXPPPPPPPPPPXXXXXXXX	HS(0.048)S(0.887)S(0.048)DEGS(0.018)GK	3	2	-0.571			7637;7639	7639	3411.4	16551	8377.1	1481.9	2348.5	1622.1
sp|O60664|PLIN3_HUMAN	241	sp|O60664|PLIN3_HUMAN	sp|O60664|PLIN3_HUMAN	>sp|O60664|PLIN3_HUMAN Perilipin-3 OS=Homo sapiens OX=9606 GN=PLIN3 PE=1 SV=3	0.970946	0.0141236	21.341	1	S	VQQQRQEQSYFVRLGSLSERLRQHAYEHSLG	X;X;X;X;X;X;X;X;X;X;X;X;X;X;X;Phospho (STY);X;X;X;X;X;X;X;X;X;X;X;X;X;X;X	XXXXXXXXXXXXXPPPPPPPXXXXXXXXXXX	LGS(0.971)LS(0.029)ER	3	2	-0.057877			10494;10495;10496	10494	32619	62789	71306	26599	29150	24902
sp|O60683|PEX10_HUMAN	261	sp|O60683|PEX10_HUMAN	sp|O60683|PEX10_HUMAN	>sp|O60683|PEX10_HUMAN Peroxisome biogenesis factor 10 OS=Homo sapiens OX=9606 GN=PEX10 PE=1 SV=1	1	0.00555286	37.835	1	S	RKEWRLHRGLSHRRASLEERAVSRNPLCTLC	X;X;X;X;X;X;X;X;X;X;X;X;X;X;X;Phospho (STY);X;X;X;X;X;X;X;X;X;X;X;X;X;X;X	XXXXXXXXXXXXXPPPPPPPXXXXXXXXXXX	RAS(1)LEER	3	2	-0.53351			13062	13062	5222.5	8347.5	6728	4075.1	2919.2	3243.5
sp|O60701|UGDH_HUMAN	476	sp|O60701|UGDH_HUMAN	sp|O60701|UGDH_HUMAN	>sp|O60701|UGDH_HUMAN UDP-glucose 6-dehydrogenase OS=Homo sapiens OX=9606 GN=UGDH PE=1 SV=1	1	9.93e-07	88.837	1	S	TIGKKVSSKRIPYAPSGEIPKFSLQDPPNKK	X;X;X;X;X;X;X;X;X;X;X;X;X;X;X;Phospho (STY);X;X;X;X;X;X;X;X;X;X;X;X;X;X;X	XXXXXXXXXPPPPPPPPPPPPXXXXXXXXXX	RIPYAPS(1)GEIPK	7	3	0.3267			13655;13656;13657	13655	36239	82053	63920	31730	32848	21691
sp|O60716|CTND1_HUMAN	346	sp|O60716|CTND1_HUMAN	sp|O60716|CTND1_HUMAN	>sp|O60716|CTND1_HUMAN Catenin delta-1 OS=Homo sapiens OX=9606 GN=CTNND1 PE=1 SV=1	1	2.67e-16	89.522	2;3	S	SDQYYWAPLAQHERGSLASLDSLRKGGPPPP	X;X;X;X;X;X;X;X;X;X;X;X;X;X;X;Phospho (STY);X;X;Phospho (STY);X;X;Phospho (STY);X;X;X;X;X;X;X;X;X	XXXXXXXXXXXXXXPPPPPPPPPPPXXXXXX	GS(1)LAS(1)LDS(1)LRK	2	3	-0.55063			7001;7002;7003;7004;7015;7016;7019;7020;7021;7022	7022	164290	272450	154590	106310	87331	79707
sp|O60716|CTND1_HUMAN	349	sp|O60716|CTND1_HUMAN	sp|O60716|CTND1_HUMAN	>sp|O60716|CTND1_HUMAN Catenin delta-1 OS=Homo sapiens OX=9606 GN=CTNND1 PE=1 SV=1	1	2.67e-16	109.67	1;2;3	S	YYWAPLAQHERGSLASLDSLRKGGPPPPNWR	X;X;X;X;X;X;X;X;X;X;X;X;Phospho (STY);X;X;Phospho (STY);X;X;Phospho (STY);X;X;X;X;X;X;X;X;X;X;X;X	XXXXXXXXXXXPPPPPPPPPPPXXXXXXXXX	GS(1)LAS(1)LDS(1)LRK	5	3	-0.55063			6996;6997;6998;6999;7000;7001;7002;7003;7004;7006;7008;7010;7011;7012;7013;7014;7015;7017;7018;7019;7020;7021;7022	7022	607500	783390	482780	379840	297110	251630
sp|O60716|CTND1_HUMAN	352	sp|O60716|CTND1_HUMAN	sp|O60716|CTND1_HUMAN	>sp|O60716|CTND1_HUMAN Catenin delta-1 OS=Homo sapiens OX=9606 GN=CTNND1 PE=1 SV=1	1	2.67e-16	109.67	1;2;3	S	APLAQHERGSLASLDSLRKGGPPPPNWRQPE	X;X;X;X;X;X;X;X;X;Phospho (STY);X;X;Phospho (STY);X;X;Phospho (STY);X;X;X;X;X;X;X;X;X;X;X;X;X;X;X	XXXXXXXXPPPPPPPPPPPXXXXXXXXXXXX	GS(1)LAS(1)LDS(1)LRK	8	3	-0.55063			6999;7000;7003;7004;7005;7007;7009;7011;7012;7013;7014;7016;7017;7018;7020;7021;7022	7022	449900	524120	299250	228470	191000	153840
sp|O60716|CTND1_HUMAN	230	sp|O60716|CTND1_HUMAN	sp|O60716|CTND1_HUMAN	>sp|O60716|CTND1_HUMAN Catenin delta-1 OS=Homo sapiens OX=9606 GN=CTNND1 PE=1 SV=1	0.714289	2.08e-05	55.452	1	S	RHYEDGYPGGSDNYGSLSRVTRIEERYRPSM	X;X;X;X;X;X;X;X;X;X;X;X;X;X;X;Phospho (STY);X;X;X;X;X;X;X;X;X;X;X;X;X;X;X	XPPPPPPPPPPPPPPPPPPXXXXXXXXXXXX	HYEDGYPGGS(0.03)DNYGS(0.714)LS(0.255)R	15	3	0.09856			7676	7676	9505.2	15977	9050.5	6762.6	5845.4	5949.3
sp|O60716|CTND1_HUMAN	129	sp|O60716|CTND1_HUMAN	sp|O60716|CTND1_HUMAN	>sp|O60716|CTND1_HUMAN Catenin delta-1 OS=Homo sapiens OX=9606 GN=CTNND1 PE=1 SV=1	0.628275	4.82e-06	44.999	1	S	EEDPEGAMSVVSVETSDDGTTRRTETTVKKV	X;X;X;X;X;X;X;X;X;X;X;X;X;X;X;Phospho (STY);X;X;X;X;X;X;X;X;X;X;X;X;X;X;X	PPPPPPPPPPPPPPPPPPPPPPXXXXXXXXX	MQEPGQIVETY(0.001)T(0.001)EEDPEGAMS(0.001)VVS(0.018)VET(0.277)S(0.628)DDGT(0.037)T(0.037)R	28	4	-1.8723			11575	11575	3081.9	3996.2	3172.9	2811.8	2483.5	1769.5
sp|O60716|CTND1_HUMAN	859	sp|O60716|CTND1_HUMAN	sp|O60716|CTND1_HUMAN	>sp|O60716|CTND1_HUMAN Catenin delta-1 OS=Homo sapiens OX=9606 GN=CTNND1 PE=1 SV=1	0.506227	9.19e-15	108.73	2	S	WKKSDFQVNLNNASRSQSSHSYDDSTLPLID	X;X;X;X;X;X;X;X;X;X;X;X;X;X;X;Phospho (STY);X;X;X;X;Phospho (STY);X;X;X;X;X;X;X;X;X;X	XXXXXXXXXXXXXXXPPPPPPPPPPPPPPPP	S(0.506)QS(0.411)S(0.18)HS(0.901)YDDS(0.001)TLPLIDR	1	3	1.0047			16823	16823	13050	16313	15953	10539	11179	9766
sp|O60716|CTND1_HUMAN	861	sp|O60716|CTND1_HUMAN	sp|O60716|CTND1_HUMAN	>sp|O60716|CTND1_HUMAN Catenin delta-1 OS=Homo sapiens OX=9606 GN=CTNND1 PE=1 SV=1	0.714496	1.06e-24	132.83	2	S	KSDFQVNLNNASRSQSSHSYDDSTLPLIDRN	X;X;X;X;X;X;X;X;X;X;X;X;X;X;X;Phospho (STY);X;X;Phospho (STY);X;X;X;X;X;X;X;X;X;X;X;X	XXXXXXXXXXXXXPPPPPPPPPPPPPPPPPX	S(0.092)QS(0.714)S(0.211)HS(0.982)YDDSTLPLIDR	3	3	0.47285			16824	16824	13344	17742	17777	11556	10906	10391
sp|O60716|CTND1_HUMAN	864	sp|O60716|CTND1_HUMAN	sp|O60716|CTND1_HUMAN	>sp|O60716|CTND1_HUMAN Catenin delta-1 OS=Homo sapiens OX=9606 GN=CTNND1 PE=1 SV=1	0.995268	2.02e-35	168.36	1;2	S	FQVNLNNASRSQSSHSYDDSTLPLIDRNQKS	X;X;X;X;X;X;X;X;X;X;Phospho (STY);X;Phospho (STY);X;X;Phospho (STY);X;X;X;X;X;X;X;X;X;X;X;X;X;X;X	XXXXXXXXXXPPPPPPPPPPPPPPPPPXXXX	SQS(0.001)S(0.004)HS(0.995)YDDSTLPLIDR	6	3	0.13832			16818;16819;16821;16822;16823;16824	16818	77111	111660	95054	66450	57894	53662
sp|O60716|CTND1_HUMAN	920	sp|O60716|CTND1_HUMAN	sp|O60716|CTND1_HUMAN	>sp|O60716|CTND1_HUMAN Catenin delta-1 OS=Homo sapiens OX=9606 GN=CTNND1 PE=1 SV=1	0.999501	4.59e-12	101.36	1	S	STPNERGDHNRTLDRSGDLGDMEPLKGTTPL	X;X;X;X;X;X;X;X;X;X;X;Phospho (STY);X;X;X;Phospho (STY);X;X;X;X;X;X;X;X;X;X;X;X;X;X;X	XXXXXXXXXXXPPPPPPPPPPPPPPPXXXXX	TLDRS(1)GDLGDMEPLK	5	3	-1.5567			18477;18478;18479	18478	88918	116400	75105	57732	51721	46381
sp|O60716|CTND1_HUMAN	268	sp|O60716|CTND1_HUMAN	sp|O60716|CTND1_HUMAN	>sp|O60716|CTND1_HUMAN Catenin delta-1 OS=Homo sapiens OX=9606 GN=CTNND1 PE=1 SV=1	0.904899	6.06e-07	107.18	1	S	RQDVYGPQPQVRVGGSSVDLHRFHPEPYGLE	X;X;X;X;X;X;X;X;X;X;X;X;X;X;X;Phospho (STY);X;X;X;X;X;X;X;X;X;X;X;X;X;X;X	XXXXXXXXXXXXPPPPPPPPPPXXXXXXXXX	VGGS(0.905)S(0.095)VDLHR	4	2	0.41081			19694;19695;19696	19695	30702	37429	31256	18770	16767	16505
sp|O60749|SNX2_HUMAN	119	sp|O60749|SNX2_HUMAN	sp|O60749|SNX2_HUMAN	>sp|O60749|SNX2_HUMAN Sorting nexin-2 OS=Homo sapiens OX=9606 GN=SNX2 PE=1 SV=2	0.922109	1.47e-08	114.54	1	S	TPTTLIAPRIESKSMSAPVIFDRSREEIEEE	X;X;X;X;X;X;X;X;X;X;X;X;X;X;X;Phospho (STY);X;X;X;X;X;X;X;X;X;X;X;X;X;X;X	XXXXXXXXXXXXXPPPPPPPPPPXXXXXXXX	S(0.078)MS(0.922)APVIFDR	3	2	-0.29207			16287;16288;16289	16289	49975	160690	83960	35520	43734	26749
sp|O60763|USO1_HUMAN	48	sp|O60763|USO1_HUMAN	sp|O60763|USO1_HUMAN	>sp|O60763|USO1_HUMAN General vesicular transport factor p115 OS=Homo sapiens OX=9606 GN=USO1 PE=1 SV=2	0.998024	0.0314477	6.0359	1	S	STLLDDRRNAVRALKSLSKKYRLEVGIQAME	X;X;X;X;X;X;X;X;X;X;X;X;X;X;X;Phospho (STY);X;X;X;X;X;X;X;X;X;X;X;X;X;X;X	XXXXXXXXXXXXPPPPPPPXXXXXXXXXXXX	ALKS(0.998)LS(0.002)K	4	2	-0.13369			1156	1156	27890	26410	21428	18591	16858	16939
sp|O60763|USO1_HUMAN	942	sp|O60763|USO1_HUMAN	sp|O60763|USO1_HUMAN	>sp|O60763|USO1_HUMAN General vesicular transport factor p115 OS=Homo sapiens OX=9606 GN=USO1 PE=1 SV=2	0.999947	2.71e-17	88.512	1	S	LKDLGHPVEEEDELESGDQEDEDDESEDPGK	X;X;X;X;X;X;X;X;X;X;X;X;X;X;X;Phospho (STY);X;X;X;X;X;X;X;X;X;X;X;X;X;X;X	XXPPPPPPPPPPPPPPPPPPPPPPPPPPPPP	DLGHPVEEEDELES(1)GDQEDEDDESEDPGKDLDHI	14	4	0.72539			2810;2811;2812;2813	2810	26197	41392	30492	20977	16618	17613
sp|O60784|TOM1_HUMAN	461	sp|O60784|TOM1_HUMAN	sp|O60784|TOM1_HUMAN	>sp|O60784|TOM1_HUMAN Target of Myb protein 1 OS=Homo sapiens OX=9606 GN=TOM1 PE=1 SV=2	0.718188	3.06e-25	117.52	1	S	FLEERAKAADRLPNLSSPSAEGPPGPPSGPA	X;X;X;X;X;X;X;X;X;X;X;X;X;X;X;Phospho (STY);X;X;X;X;X;X;X;X;X;X;X;X;X;X;X	XXXXXXXPPPPPPPPPPPPPPPPPPPPPPPP	AADRLPNLS(0.718)S(0.274)PS(0.007)AEGPPGPPSGPAPR	9	4	-0.62069			28;29	28	23402	38235	33477	20253	15736	16514
sp|O60784|TOM1_HUMAN	462	sp|O60784|TOM1_HUMAN	sp|O60784|TOM1_HUMAN	>sp|O60784|TOM1_HUMAN Target of Myb protein 1 OS=Homo sapiens OX=9606 GN=TOM1 PE=1 SV=2	0.798482	2.81e-25	114.62	1	S	LEERAKAADRLPNLSSPSAEGPPGPPSGPAP	X;X;X;X;X;X;X;X;X;X;X;X;X;X;X;Phospho (STY);X;X;X;X;X;X;X;X;X;X;X;X;X;X;X	XXXXXXPPPPPPPPPPPPPPPPPPPPPPPPP	LPNLS(0.154)S(0.798)PS(0.047)AEGPPGPPSGPAPR	6	3	-0.36536			30;10858;10859;10860;10861	10860	56068	84590	77243	43826	43246	41046
sp|O60784|TOM1_HUMAN	355	sp|O60784|TOM1_HUMAN	sp|O60784|TOM1_HUMAN	>sp|O60784|TOM1_HUMAN Target of Myb protein 1 OS=Homo sapiens OX=9606 GN=TOM1 PE=1 SV=2	0.991947	4.48e-06	88.88	1	S	AGMNLGSSSVRAGLQSLEASGRLEDEFDMFA	X;X;X;X;X;X;X;X;X;X;X;X;X;X;X;Phospho (STY);X;X;X;X;X;X;X;X;X;X;X;X;X;X;X	XXXXXXXXXXXPPPPPPPPPPPXXXXXXXXX	AGLQS(0.992)LEAS(0.008)GR	5	2	0.55363			906;907;908	906	46727	89737	71084	37129	40147	39138
sp|O60784|TOM1_HUMAN	376	sp|O60784|TOM1_HUMAN	sp|O60784|TOM1_HUMAN	>sp|O60784|TOM1_HUMAN Target of Myb protein 1 OS=Homo sapiens OX=9606 GN=TOM1 PE=1 SV=2	0.977352	0.00387653	39.589	1	S	RLEDEFDMFALTRGSSLADQRKEVKYEAPQA	X;X;X;X;X;X;X;X;X;X;X;X;X;X;X;Phospho (STY);X;X;X;X;X;X;X;X;X;X;X;X;X;X;X	XXXXXXXXXXXXXPPPPPPPPXXXXXXXXXX	GS(0.023)S(0.977)LADQR	3	2	0.71186			7207;7208	7208	14944	27275	25009	6977.4	7985.9	7192.2
sp|O60825|F262_HUMAN	483	sp|O60825|F262_HUMAN	sp|O60825|F262_HUMAN	>sp|O60825|F262_HUMAN 6-phosphofructo-2-kinase/fructose-2,6-bisphosphatase 2 OS=Homo sapiens OX=9606 GN=PFKFB2 PE=1 SV=2	0.998352	0.0174011	33.8	1	S	TPLSSSNTIRRPRNYSVGSRPLKPLSPLRAQ	X;X;X;X;X;X;X;X;X;X;X;X;X;X;X;Phospho (STY);X;X;X;X;X;X;X;X;X;X;X;X;X;X;X	XXXXXXXXXXXXXPPPPPPPXXXXXXXXXXX	NY(0.001)S(0.998)VGSR	3	2	0.43829			12056	12056	12341	18476	19546	7680.7	8093.2	7721.1
sp|O60825|F262_HUMAN	466	sp|O60825|F262_HUMAN	sp|O60825|F262_HUMAN	>sp|O60825|F262_HUMAN 6-phosphofructo-2-kinase/fructose-2,6-bisphosphatase 2 OS=Homo sapiens OX=9606 GN=PFKFB2 PE=1 SV=2	0.993303	0.00365179	30.602	1	S	NNFPKNQTPVRMRRNSFTPLSSSNTIRRPRN	X;X;X;X;X;X;X;X;X;X;X;X;X;X;X;Phospho (STY);X;X;X;X;X;X;X;X;X;X;X;X;X;X;X	XXXXXXXXXXXXXPPPPPPPPPPPPPPXXXX	RNS(0.993)FT(0.006)PLSSSNTIR	3	3	1.1641			13869	13869	10350	17998	15866	7896.7	8389.8	7684.7
sp|O60832|DKC1_HUMAN	485	sp|O60832|DKC1_HUMAN	sp|O60832|DKC1_HUMAN	>sp|O60832|DKC1_HUMAN H/ACA ribonucleoprotein complex subunit DKC1 OS=Homo sapiens OX=9606 GN=DKC1 PE=1 SV=3	0.999612	6.34e-05	53.399	2	S	KKKSKKDKKAKAGLESGAEPGDGDSDTTKKK	X;X;X;X;X;X;X;X;X;X;X;X;X;X;X;Phospho (STY);X;X;X;X;X;X;X;X;Phospho (STY);X;X;X;X;X;X	XXXXXXXXXXXPPPPPPPPPPPPPPPPPPXX	AGLES(1)GAEPGDGDS(0.929)DT(0.053)T(0.018)K	5	3	0.98836			893	893	12656	16626	12573	9983.7	9325	8976.7
sp|O60832|DKC1_HUMAN	494	sp|O60832|DKC1_HUMAN	sp|O60832|DKC1_HUMAN	>sp|O60832|DKC1_HUMAN H/ACA ribonucleoprotein complex subunit DKC1 OS=Homo sapiens OX=9606 GN=DKC1 PE=1 SV=3	0.996911	3.15e-31	140.94	1;2	S	AKAGLESGAEPGDGDSDTTKKKKKKKKAKEV	X;X;X;X;X;X;Phospho (STY);X;X;X;X;X;X;X;X;Phospho (STY);X;X;X;X;X;X;X;X;X;X;X;X;X;X;X	XXPPPPPPPPPPPPPPPPPPPXXXXXXXXXX	AGLESGAEPGDGDS(0.997)DT(0.002)T(0.001)K	14	2	0.85182			883;884;885;886;887;888;889;890;891;892;893;894;895;896;897;898;899;900	884	260070	581010	324740	184960	181640	166540
sp|O60832|DKC1_HUMAN	513	sp|O60832|DKC1_HUMAN	sp|O60832|DKC1_HUMAN	>sp|O60832|DKC1_HUMAN H/ACA ribonucleoprotein complex subunit DKC1 OS=Homo sapiens OX=9606 GN=DKC1 PE=1 SV=3	1	0.00168083	124.21	1	S	KKKKKKKKAKEVELVSE______________	X;X;X;X;X;X;X;X;X;X;X;X;X;X;X;Phospho (STY);X;X;X;X;X;X;X;X;X;X;X;X;X;X;X	XXXXXXXXPPPPPPPPPXXXXXXXXXXXXXX	EVELVS(1)E	6	2	-0.78242			1036;1037;1038;5151;5152;5153	5153	76006	132330	86522	43937	55035	49034
sp|O60832|DKC1_HUMAN	451	sp|O60832|DKC1_HUMAN	sp|O60832|DKC1_HUMAN	>sp|O60832|DKC1_HUMAN H/ACA ribonucleoprotein complex subunit DKC1 OS=Homo sapiens OX=9606 GN=DKC1 PE=1 SV=3	0.999021	8.28e-24	127.42	1;2;3	S	QVVAEAAKTAKRKRESESESDETPPAAPQLI	X;X;X;X;X;X;X;X;X;X;X;X;X;X;X;Phospho (STY);X;Phospho (STY);X;Phospho (STY);X;X;Phospho (STY);X;X;X;X;X;X;X;X	XXXXXXXXXXXXPPPPPPPPPPPPPPPPPPP	KRES(0.999)ES(0.993)ES(0.538)DET(0.469)PPAAPQLIK	4	4	-0.57768			9630;9631;9632;9633;9634;9635;9636;9637;9638;9639;9640;9641;9642;9643;9645;9646	9642	173240	380060	250940	124650	120790	118530
sp|O60832|DKC1_HUMAN	453	sp|O60832|DKC1_HUMAN	sp|O60832|DKC1_HUMAN	>sp|O60832|DKC1_HUMAN H/ACA ribonucleoprotein complex subunit DKC1 OS=Homo sapiens OX=9606 GN=DKC1 PE=1 SV=3	0.993401	8.28e-24	127.42	2;3	S	VAEAAKTAKRKRESESESDETPPAAPQLIKK	X;X;X;X;X;X;X;X;X;X;X;X;X;Phospho (STY);X;Phospho (STY);X;Phospho (STY);X;X;Phospho (STY);X;X;X;X;X;X;X;X;X;X	XXXXXXXXXXPPPPPPPPPPPPPPPPPPPPX	KRES(0.999)ES(0.993)ES(0.538)DET(0.469)PPAAPQLIK	6	4	-0.57768			9633;9634;9635;9636;9637;9638;9639;9640;9641;9642;9643;9644;9645	9642	133600	301480	186140	91685	94791	92501
sp|O60832|DKC1_HUMAN	455	sp|O60832|DKC1_HUMAN	sp|O60832|DKC1_HUMAN	>sp|O60832|DKC1_HUMAN H/ACA ribonucleoprotein complex subunit DKC1 OS=Homo sapiens OX=9606 GN=DKC1 PE=1 SV=3	0.982983	3.66e-10	78.882	2;3	S	EAAKTAKRKRESESESDETPPAAPQLIKKEK	X;X;X;X;X;X;X;X;X;X;X;Phospho (STY);X;Phospho (STY);X;Phospho (STY);X;X;Phospho (STY);X;X;X;X;X;X;X;X;X;X;X;X	XXXXXXXXPPPPPPPPPPPPPPPPPPPPXXX	KRES(0.312)ES(0.713)ES(0.983)DET(0.992)PPAAPQLIK	8	3	0.70413			9632;9636;9638;9641;9642;9643;9644;9645;9646	9644	108050	224590	141700	71690	73887	70721
sp|O60841|IF2P_HUMAN	107	sp|O60841|IF2P_HUMAN	sp|O60841|IF2P_HUMAN	>sp|O60841|IF2P_HUMAN Eukaryotic translation initiation factor 5B OS=Homo sapiens OX=9606 GN=EIF5B PE=1 SV=4	1	3.84e-20	117.13	1;2	S	TSKDKKKKGQKGKKQSFDDNDSEELEDKDSK	X;X;X;X;X;X;X;X;X;X;X;X;X;X;X;Phospho (STY);X;X;X;X;X;Phospho (STY);X;X;X;X;X;X;X;X;X	XXXXXXXXXXXXXPPPPPPPPPPPPPPPPPP	KQS(1)FDDNDS(1)EELEDKDSK	3	5	-0.11854			9566;9570;9571;9572;9573;9574;9575;9576;9577	9577	122420	242150	165180	77743	86248	87630
sp|O60841|IF2P_HUMAN	113	sp|O60841|IF2P_HUMAN	sp|O60841|IF2P_HUMAN	>sp|O60841|IF2P_HUMAN Eukaryotic translation initiation factor 5B OS=Homo sapiens OX=9606 GN=EIF5B PE=1 SV=4	1	5.44e-30	139.76	1;2	S	KKGQKGKKQSFDDNDSEELEDKDSKSKKTAK	X;X;X;X;X;X;X;X;X;Phospho (STY);X;X;X;X;X;Phospho (STY);X;X;X;X;X;X;X;X;X;X;X;X;X;X;X	XXXXXXXPPPPPPPPPPPPPPPPPPXXXXXX	QSFDDNDS(1)EELEDKDSK	8	3	-1.3386			9567;9568;9569;9570;9571;9572;9573;9574;9575;9576;9577;12804;12805;12806	12806	240690	369410	226060	139070	140320	128470
sp|O60841|IF2P_HUMAN	164	sp|O60841|IF2P_HUMAN	sp|O60841|IF2P_HUMAN	>sp|O60841|IF2P_HUMAN Eukaryotic translation initiation factor 5B OS=Homo sapiens OX=9606 GN=EIF5B PE=1 SV=4	1	6.73e-12	125.34	1	S	KAKGKAQKSNKKWDGSEEDEDNSKKIKERSR	X;X;X;X;X;X;X;X;X;X;X;X;X;X;X;Phospho (STY);X;X;X;X;X;X;X;X;X;X;X;X;X;X;X	XXXXXXXXXXXPPPPPPPPPPPPPPXXXXXX	WDGS(1)EEDEDNSK	4	3	0.5144			10010;10011;20440;20441;20442;20443;20444;20445;20446	20442	191670	301870	197650	141950	119160	121610
sp|O60841|IF2P_HUMAN	214	sp|O60841|IF2P_HUMAN	sp|O60841|IF2P_HUMAN	>sp|O60841|IF2P_HUMAN Eukaryotic translation initiation factor 5B OS=Homo sapiens OX=9606 GN=EIF5B PE=1 SV=4	1	1.19e-50	173.76	1	S	GQKKNQKNKPGPNIESGNEDDDASFKIKTVA	X;X;X;X;X;X;X;X;X;X;X;X;X;X;X;Phospho (STY);X;X;X;X;X;X;X;X;X;X;X;X;X;X;X	XXXXXXXPPPPPPPPPPPPPPPPPPPXXXXX	NKPGPNIES(1)GNEDDDASFK	9	3	0.85391			11784;11785;11786;11787	11786	99113	158090	86026	63113	61636	53337
sp|O60841|IF2P_HUMAN	135	sp|O60841|IF2P_HUMAN	sp|O60841|IF2P_HUMAN	>sp|O60841|IF2P_HUMAN Eukaryotic translation initiation factor 5B OS=Homo sapiens OX=9606 GN=EIF5B PE=1 SV=4	1	1.32e-30	143.38	2	S	DSKSKKTAKPKVEMYSGSDDDDDFNKLPKKA	X;X;X;X;X;X;X;X;X;X;X;X;X;Oxidation (M);X;Phospho (STY);X;Phospho (STY);X;X;X;X;X;X;X;X;X;X;X;X;X	XXXXXXXXXXXPPPPPPPPPPPPPPPPPPXX	VEMYS(1)GS(1)DDDDDFNKLPK	5	3	0.45811			19581;19582;19583;19584;19585;19586;19587;19588;19589	19589	241660	316010	127950	126660	133800	99249
sp|O60841|IF2P_HUMAN	137	sp|O60841|IF2P_HUMAN	sp|O60841|IF2P_HUMAN	>sp|O60841|IF2P_HUMAN Eukaryotic translation initiation factor 5B OS=Homo sapiens OX=9606 GN=EIF5B PE=1 SV=4	1	1.32e-30	143.38	2	S	KSKKTAKPKVEMYSGSDDDDDFNKLPKKAKG	X;X;X;X;X;X;X;X;X;X;X;Oxidation (M);X;Phospho (STY);X;Phospho (STY);X;X;X;X;X;X;X;X;X;X;X;X;X;X;X	XXXXXXXXXPPPPPPPPPPPPPPPPPPXXXX	VEMYS(1)GS(1)DDDDDFNKLPK	7	3	0.45811			19581;19582;19583;19584;19585;19586;19587;19588;19589	19589	241660	316010	127950	126660	133800	99249
sp|O60879|DIAP2_HUMAN	172	sp|O60879|DIAP2_HUMAN	sp|O60879|DIAP2_HUMAN	>sp|O60879|DIAP2_HUMAN Protein diaphanous homolog 2 OS=Homo sapiens OX=9606 GN=DIAPH2 PE=1 SV=1	0.999942	0.0428119	20.804	1	S	HECTLSSQEYVHELRSGISDEKLLNCLESLR	X;X;X;X;X;X;X;X;X;X;X;X;X;X;X;Phospho (STY);X;X;X;X;X;X;X;X;X;X;X;X;X;X;X	XXXXXXXXXXXXXXXPPPPPPPXXXXXXXXX	S(1)GISDEK	1	2	2.3675			15409	15409	16435	21170	17350	12690	10978	8744.2
sp|O60885|BRD4_HUMAN	469	sp|O60885|BRD4_HUMAN	sp|O60885|BRD4_HUMAN	>sp|O60885|BRD4_HUMAN Bromodomain-containing protein 4 OS=Homo sapiens OX=9606 GN=BRD4 PE=1 SV=2	0.499736	4.34e-08	64.662		S	FAKMPDEPEEPVVAVSSPAVPPPTKVVAPPS	X;X;X;X;X;X;X;X;X;X;X;X;X;X;X;Phospho (STY);X;X;X;X;X;X;X;X;X;X;X;X;X;X;X	XXXPPPPPPPPPPPPPPPPPPPPPPXXXXXX	MPDEPEEPVVAVS(0.5)S(0.5)PAVPPPT(0.001)K	13	4	-0.74187				11559	0	0	0	0	0	0
sp|O60885|BRD4_HUMAN	470	sp|O60885|BRD4_HUMAN	sp|O60885|BRD4_HUMAN	>sp|O60885|BRD4_HUMAN Bromodomain-containing protein 4 OS=Homo sapiens OX=9606 GN=BRD4 PE=1 SV=2	0.499736	4.34e-08	64.662		S	AKMPDEPEEPVVAVSSPAVPPPTKVVAPPSS	X;X;X;X;X;X;X;X;X;X;X;X;X;X;X;X;X;X;X;X;X;X;X;X;X;X;X;X;X;X;X	XXXXXXXXXXXXXXXXXXXXXXXXXXXXXXX	MPDEPEEPVVAVS(0.5)S(0.5)PAVPPPT(0.001)K	14	4	-0.74187				11559	0	0	0	0	0	0
sp|O60885|BRD4_HUMAN	601	sp|O60885|BRD4_HUMAN	sp|O60885|BRD4_HUMAN	>sp|O60885|BRD4_HUMAN Bromodomain-containing protein 4 OS=Homo sapiens OX=9606 GN=BRD4 PE=1 SV=2	0.999909	1.26e-11	111.05	1	S	KEPAPMKSKPPPTYESEEEDKCKPMSYEEKR	X;X;X;X;X;X;X;X;X;X;X;X;X;X;X;Phospho (STY);X;X;X;X;X;X;X;X;X;X;X;X;X;X;X	XXXXXXXPPPPPPPPPPPPPPXXXXXXXXXX	SKPPPTYES(1)EEEDK	9	3	-0.21954			15807;15808	15808	26310	37907	31139	20003	17065	15952
sp|O60936|NOL3_HUMAN	147	sp|O60936|NOL3_HUMAN	sp|O60936|NOL3_HUMAN	>sp|O60936|NOL3_HUMAN Nucleolar protein 3 OS=Homo sapiens OX=9606 GN=NOL3 PE=1 SV=2	0.497481	7.1e-09	56.997		S	DPDEAGGPEGSEAVQSGTPEEPEPELEAEAS	X;X;X;X;X;X;X;X;X;X;X;X;X;X;X;Phospho (STY);X;X;X;X;X;X;X;X;X;X;X;X;X;X;X	PPPPPPPPPPPPPPPPPPPPPPPPPPPPPPP	ASDPDEAGGPEGS(0.005)EAVQS(0.497)GT(0.497)PEEPEPELEAEASK	18	4	0.50747				1720	0	0	0	0	0	0
sp|O75022|LIRB3_HUMAN	502	sp|O75022|LIRB3_HUMAN	sp|O75022|LIRB3_HUMAN	>sp|O75022|LIRB3_HUMAN Leukocyte immunoglobulin-like receptor subfamily B member 3 OS=Homo sapiens OX=9606 GN=LILRB3 PE=1 SV=3	0.5	6.12e-11	98.5	1	S	GAAETEPKDRGLLRRSSPAADVQEENLYAAV	X;X;X;X;X;X;X;X;X;X;X;X;X;X;X;Phospho (STY);X;X;X;X;X;X;X;X;X;X;X;X;X;X;X	XXXXXXXXXXXXXXPPPPPPPPPPPPPPPPP	RS(0.5)S(0.5)PAADVQEENLYAAVK	2	3	0.89492			14426;14427;14428	14426	41352	66061	45544	32430	34920	27235
sp|O75022|LIRB3_HUMAN	503	sp|O75022|LIRB3_HUMAN	sp|O75022|LIRB3_HUMAN	>sp|O75022|LIRB3_HUMAN Leukocyte immunoglobulin-like receptor subfamily B member 3 OS=Homo sapiens OX=9606 GN=LILRB3 PE=1 SV=3	0.5	6.12e-11	98.5	1	S	AAETEPKDRGLLRRSSPAADVQEENLYAAVK	X;X;X;X;X;X;X;X;X;X;X;X;X;X;X;X;X;X;X;X;X;X;X;X;X;X;X;X;X;X;X	XXXXXXXXXXXXXXXXXXXXXXXXXXXXXXX	RS(0.5)S(0.5)PAADVQEENLYAAVK	3	3	0.89492			14426;14427;14428	14426	41352	66061	45544	32430	34920	27235
sp|O75064|DEN4B_HUMAN	736	sp|O75064|DEN4B_HUMAN	sp|O75064|DEN4B_HUMAN	>sp|O75064|DEN4B_HUMAN DENN domain-containing protein 4B OS=Homo sapiens OX=9606 GN=DENND4B PE=1 SV=4	0.898315	0.00146762	38.898	1	S	PGALPVPGPSRSAPSSPAPRRTKQEMKVAQR	X;X;X;X;X;X;X;X;X;X;X;X;X;X;X;Phospho (STY);X;X;X;X;X;X;X;X;X;X;X;X;X;X;X	XXXXXXXXXXXPPPPPPPPPXXXXXXXXXXX	SAPS(0.102)S(0.898)PAPR	5	2	0.18979			14789	14789	7441.2	9581.4	9612.7	5598.3	5601.9	5538.2
sp|O75113|N4BP1_HUMAN	300	sp|O75113|N4BP1_HUMAN	sp|O75113|N4BP1_HUMAN	>sp|O75113|N4BP1_HUMAN NEDD4-binding protein 1 OS=Homo sapiens OX=9606 GN=N4BP1 PE=1 SV=4	1	2.7e-20	120.84	1	S	RRFSDSEERHTKKQFSLENVQEGEILHDAKT	X;X;X;Phospho (STY);X;X;X;X;X;X;X;X;X;X;X;Phospho (STY);X;X;X;X;X;X;X;X;X;X;X;X;X;X;X	XXXXXXXXXXXXPPPPPPPPPPPPPPPPPPX	KQFS(1)LENVQEGEILHDAK	4	4	0.24073			9543;9544;9545	9545	35278	53057	37229	28638	27833	24429
sp|O75113|N4BP1_HUMAN	288	sp|O75113|N4BP1_HUMAN	sp|O75113|N4BP1_HUMAN	>sp|O75113|N4BP1_HUMAN NEDD4-binding protein 1 OS=Homo sapiens OX=9606 GN=N4BP1 PE=1 SV=4	0.991605	0.000695658	72.695	1	S	EEALSNERICQKRRFSDSEERHTKKQFSLEN	X;X;X;X;X;X;X;X;X;X;X;X;X;X;X;Phospho (STY);X;X;X;X;X;X;X;X;X;X;X;Phospho (STY);X;X;X	XXXXXXXXXXXXXPPPPPPPPXXXXXXXXXX	RFS(0.992)DS(0.008)EER	3	3	-0.021509			13345;13346	13345	10186	18448	9579.7	8280.9	6355.7	4609.5
sp|O75116|ROCK2_HUMAN	1133	sp|O75116|ROCK2_HUMAN	sp|O75116|ROCK2_HUMAN	>sp|O75116|ROCK2_HUMAN Rho-associated protein kinase 2 OS=Homo sapiens OX=9606 GN=ROCK2 PE=1 SV=4	0.451891	4.48e-12	68.631	2	S	QLRSQLQALHIGLDSSSIGSGPGDAEADDGF	X;X;X;X;X;X;X;X;X;X;X;X;X;X;X;Phospho (STY);X;X;X;X;X;X;X;X;X;X;X;X;X;X;X	XXXPPPPPPPPPPPPPPPPPPPPPPPPPPPP	SQLQALHIGLDS(0.042)S(0.452)S(0.452)IGS(0.054)GPGDAEADDGFPESR	13	3	0.078059			16724;16725	16722	6630.3	8776	8236.8	7160.9	6094.6	6630.2
sp|O75116|ROCK2_HUMAN	1134	sp|O75116|ROCK2_HUMAN	sp|O75116|ROCK2_HUMAN	>sp|O75116|ROCK2_HUMAN Rho-associated protein kinase 2 OS=Homo sapiens OX=9606 GN=ROCK2 PE=1 SV=4	0.61813	3.8e-12	64.95	2	S	LRSQLQALHIGLDSSSIGSGPGDAEADDGFP	X;X;X;X;X;X;X;X;X;X;X;X;X;X;X;Phospho (STY);X;X;Phospho (STY);X;X;X;X;X;X;X;X;X;X;X;X	XXPPPPPPPPPPPPPPPPPPPPPPPPPPPPP	SQLQALHIGLDS(0.121)S(0.593)S(0.618)IGS(0.667)GPGDAEADDGFPESR	14	3	-0.13532			16723;16724;16725	16725	13419	18930	16323	12953	10771	10929
sp|O75116|ROCK2_HUMAN	1137	sp|O75116|ROCK2_HUMAN	sp|O75116|ROCK2_HUMAN	>sp|O75116|ROCK2_HUMAN Rho-associated protein kinase 2 OS=Homo sapiens OX=9606 GN=ROCK2 PE=1 SV=4	0.876561	3.8e-12	64.95	2	S	QLQALHIGLDSSSIGSGPGDAEADDGFPESR	X;X;X;X;X;X;X;X;X;X;X;X;Phospho (STY);X;X;Phospho (STY);X;X;X;X;X;X;X;X;X;X;X;X;X;X;X	PPPPPPPPPPPPPPPPPPPPPPPPPPPPPPP	SQLQALHIGLDS(0.108)S(0.487)S(0.528)IGS(0.877)GPGDAEADDGFPESR	17	4	0.86543			16723;16724;16725	16723	13419	18930	16323	12953	10771	10929
sp|O75122|CLAP2_HUMAN	368	sp|O75122|CLAP2_HUMAN	sp|O75122|CLAP2_HUMAN	>sp|O75122|CLAP2_HUMAN CLIP-associating protein 2 OS=Homo sapiens OX=9606 GN=CLASP2 PE=1 SV=3	0.631352	1.15e-10	101.78	1	S	AGSSKASSLPGSLQRSRSDIDVNAAAGAKAH	X;X;X;X;X;X;X;X;X;X;X;X;X;X;X;Phospho (STY);X;X;X;X;X;X;X;X;X;X;X;X;X;X;X	XXXXXXXXXXXXXXXPPPPPPPPPPPPPPXX	S(0.631)RS(0.369)DIDVNAAAGAK	1	3	1.0727			16922;16923;16924	16922	83601	116920	72848	50738	46857	44636
sp|O75122|CLAP2_HUMAN	370	sp|O75122|CLAP2_HUMAN	sp|O75122|CLAP2_HUMAN	>sp|O75122|CLAP2_HUMAN CLIP-associating protein 2 OS=Homo sapiens OX=9606 GN=CLASP2 PE=1 SV=3	0.5	0.000448983	45.098	1	S	SSKASSLPGSLQRSRSDIDVNAAAGAKAHHA	X;X;X;X;X;X;X;X;X;X;X;X;X;X;X;X;X;X;X;X;X;X;X;X;X;X;X;X;X;X;X	XXXXXXXXXXXXXXXXXXXXXXXXXXXXXXX	S(0.5)RS(0.5)DIDVNAAAGAK	3	3	-0.42104			16924	16924	28452	41838	23514	16452	15610	14809
sp|O75122|CLAP2_HUMAN	596	sp|O75122|CLAP2_HUMAN	sp|O75122|CLAP2_HUMAN	>sp|O75122|CLAP2_HUMAN CLIP-associating protein 2 OS=Homo sapiens OX=9606 GN=CLASP2 PE=1 SV=3	0.820281	6.05e-15	106.4	1	S	RLSSSVSAMRVLNTGSDVEEAVADALKKPAR	X;X;X;X;X;X;X;X;X;X;X;X;X;X;X;Phospho (STY);X;X;X;X;X;X;X;X;X;X;X;X;X;X;X	XXXXXXXXXXPPPPPPPPPPPPPPPPPXXXX	VLNT(0.18)GS(0.82)DVEEAVADALK	6	3	-0.18756			19937;19938	19937	17315	11473	8472.4	10209	8701.1	9402
sp|O75128|COBL_HUMAN	234	sp|O75128|COBL_HUMAN	sp|O75128|COBL_HUMAN	>sp|O75128|COBL_HUMAN Protein cordon-bleu OS=Homo sapiens OX=9606 GN=COBL PE=1 SV=2	0.498492	0.00344082	22.618		S	KELYAWDNRRETFRKSSLGNDETDKEKKKFL	X;X;X;X;X;X;X;X;X;X;X;X;X;X;X;Phospho (STY);X;X;X;X;X;X;X;X;X;X;X;X;X;X;X	XXXXXXXXXXXXXXPPPPPPPPPPPPPXXXX	KS(0.498)S(0.498)LGNDET(0.003)DKEK	2	3	0.15179				9767	0	0	0	0	0	0
sp|O75128|COBL_HUMAN	235	sp|O75128|COBL_HUMAN	sp|O75128|COBL_HUMAN	>sp|O75128|COBL_HUMAN Protein cordon-bleu OS=Homo sapiens OX=9606 GN=COBL PE=1 SV=2	0.958353	0.000225492	44.777	1	S	ELYAWDNRRETFRKSSLGNDETDKEKKKFLG	X;X;X;X;X;X;X;X;X;X;X;X;X;X;X;Phospho (STY);X;X;X;X;X;X;X;X;X;X;X;X;X;X;X	XXXXXXXXXXXXXPPPPPPPPPPPPPXXXXX	KS(0.042)S(0.958)LGNDETDKEK	3	4	-0.42928			9766;9768	9768	29685	49317	34434	22122	15092	14809
sp|O75128|COBL_HUMAN	815	sp|O75128|COBL_HUMAN	sp|O75128|COBL_HUMAN	>sp|O75128|COBL_HUMAN Protein cordon-bleu OS=Homo sapiens OX=9606 GN=COBL PE=1 SV=2	1	0.00711727	35.009	1	S	TQNPESRLQADPKPISPQQKSAHHEGRNPLG	X;X;X;X;X;X;X;X;X;X;X;X;X;X;X;Phospho (STY);X;X;X;X;X;X;X;X;X;X;X;X;X;X;X	XXXXXXXPPPPPPPPPPPPPXXXXXXXXXXX	LQADPKPIS(1)PQQK	9	3	0.63669			10924	10924	10109	25553	16211	9289.5	8863.8	9195.4
sp|O75131|CPNE3_HUMAN	242	sp|O75131|CPNE3_HUMAN	sp|O75131|CPNE3_HUMAN	>sp|O75131|CPNE3_HUMAN Copine-3 OS=Homo sapiens OX=9606 GN=CPNE3 PE=1 SV=1	0.5	7.43e-14	136.71	1	S	GTFQTTMTKLKEASRSSPVEFECINEKKRQK	X;X;X;X;X;X;X;X;X;X;X;X;X;X;X;Phospho (STY);X;X;X;X;X;X;X;X;X;X;X;X;X;X;X	XXXXXXXXXXXPPPPPPPPPPPPPPPPXXXX	S(0.5)S(0.5)PVEFECINEK	1	3	0.24592			17301	17301	25744	25884	27198	18910	15458	15537
sp|O75131|CPNE3_HUMAN	243	sp|O75131|CPNE3_HUMAN	sp|O75131|CPNE3_HUMAN	>sp|O75131|CPNE3_HUMAN Copine-3 OS=Homo sapiens OX=9606 GN=CPNE3 PE=1 SV=1	0.5	7.43e-14	136.71	1	S	TFQTTMTKLKEASRSSPVEFECINEKKRQKK	X;X;X;X;X;X;X;X;X;X;X;X;X;X;X;X;X;X;X;X;X;X;X;X;X;X;X;X;X;X;X	XXXXXXXXXXXXXXXXXXXXXXXXXXXXXXX	S(0.5)S(0.5)PVEFECINEK	2	3	0.24592			17301	17301	25744	25884	27198	18910	15458	15537
sp|O75151|PHF2_HUMAN	882	sp|O75151|PHF2_HUMAN	sp|O75151|PHF2_HUMAN	>sp|O75151|PHF2_HUMAN Lysine-specific demethylase PHF2 OS=Homo sapiens OX=9606 GN=PHF2 PE=1 SV=4	0.999594	3.77e-10	79.516	1	S	DACFKDSDYVYPSLESDEDNPIFKSRSKKRK	X;X;X;X;X;X;X;X;X;X;X;X;X;X;X;Phospho (STY);X;X;X;X;X;X;X;X;X;X;X;X;X;X;X	XXXXXPPPPPPPPPPPPPPPPPPPXXXXXXX	DSDYVYPSLES(1)DEDNPIFK	11	3	-0.6784			3102	3102	14139	17189	13948	11535	11514	8854.7
sp|O75151|PHF2_HUMAN	539	sp|O75151|PHF2_HUMAN	sp|O75151|PHF2_HUMAN	>sp|O75151|PHF2_HUMAN Lysine-specific demethylase PHF2 OS=Homo sapiens OX=9606 GN=PHF2 PE=1 SV=4	0.787327	4.85e-09	83.652	1	S	KDGGKKKGKKSRESASPTIPNLDLLEAHTKE	X;X;X;X;X;X;X;X;X;X;X;X;X;X;X;Phospho (STY);X;X;X;X;X;X;X;X;X;X;X;X;X;X;X	XXXXXXXXXXXXPPPPPPPPPPPPPPPPPPX	ES(0.169)AS(0.787)PT(0.044)IPNLDLLEAHTK	4	4	-0.15084			4763;4765	4765	8357.3	10918	8219.7	4955.1	6256.8	5147.1
sp|O75151|PHF2_HUMAN	899	sp|O75151|PHF2_HUMAN	sp|O75151|PHF2_HUMAN	>sp|O75151|PHF2_HUMAN Lysine-specific demethylase PHF2 OS=Homo sapiens OX=9606 GN=PHF2 PE=1 SV=4	0.997495	4.17e-06	75.192	1;2	S	EDNPIFKSRSKKRKGSDDAPYSPTARVGPSV	X;X;X;X;X;X;X;X;X;X;X;X;X;X;X;Phospho (STY);X;X;X;X;X;X;X;Phospho (STY);X;X;X;X;X;X;X	XXXXXXXXXXXXPPPPPPPPPPPPPPXXXXX	KGS(0.997)DDAPYS(0.002)PTAR	3	3	0.7928			9037;9038;13688	9038	37432	77212	57223	31348	32893	30256
sp|O75151|PHF2_HUMAN	1056	sp|O75151|PHF2_HUMAN	sp|O75151|PHF2_HUMAN	>sp|O75151|PHF2_HUMAN Lysine-specific demethylase PHF2 OS=Homo sapiens OX=9606 GN=PHF2 PE=1 SV=4	0.610903	0.0059681	29.154	1	S	SQPMAPGVFLTQRRPSASSPNNNTAAKGKRT	X;X;X;X;X;X;X;X;X;X;X;X;X;X;X;Phospho (STY);X;X;X;X;X;X;X;X;X;X;X;X;X;X;X	XXXXXXXXXXXXXPPPPPPPPPPPPPPXXXX	RPS(0.611)AS(0.194)S(0.194)PNNNTAAK	3	3	-0.014985			14042	14042	10356	10396	11143	5055.1	4314.4	5232.6
sp|O75152|ZC11A_HUMAN;sp|A0A1B0GTU1|ZC11B_HUMAN	758;759	sp|O75152|ZC11A_HUMAN	sp|O75152|ZC11A_HUMAN	>sp|O75152|ZC11A_HUMAN Zinc finger CCCH domain-containing protein 11A OS=Homo sapiens OX=9606 GN=ZC3H11A PE=1 SV=3;>sp|A0A1B0GTU1|ZC11B_HUMAN Zinc finger CCCH domain-containing protein 11B OS=Homo sapiens OX=9606 GN=ZC3H11B PE=4 SV=1	0.998944	4.64e-24	125.65	2;3	S	SGPSSSQMSMKTRRLSSASTGKPPLSVEDDF	X;X;X;X;X;X;X;X;X;X;X;X;X;X;X;Phospho (STY);Phospho (STY);X;Phospho (STY);X;X;X;X;X;X;X;X;X;X;X;X	XXXXXXXXXXXXXPPPPPPPPPPPPPPPPPP	RLS(0.999)S(0.997)AS(0.945)T(0.059)GKPPLSVEDDFEK	3	4	-0.16456			13828;13829;13830;13831;13832;13833;13834;13835	13835	101310	194990	181560	78644	75114	74852
sp|O75152|ZC11A_HUMAN;sp|A0A1B0GTU1|ZC11B_HUMAN	759;760	sp|O75152|ZC11A_HUMAN	sp|O75152|ZC11A_HUMAN	>sp|O75152|ZC11A_HUMAN Zinc finger CCCH domain-containing protein 11A OS=Homo sapiens OX=9606 GN=ZC3H11A PE=1 SV=3;>sp|A0A1B0GTU1|ZC11B_HUMAN Zinc finger CCCH domain-containing protein 11B OS=Homo sapiens OX=9606 GN=ZC3H11B PE=4 SV=1	0.998435	1.47e-17	102.05	2;3	S	GPSSSQMSMKTRRLSSASTGKPPLSVEDDFE	X;X;X;X;X;X;X;X;X;X;X;X;X;X;Phospho (STY);Phospho (STY);X;Phospho (STY);X;X;X;X;X;X;X;X;X;X;X;X;X	XXXXXXXXXXXXPPPPPPPPPPPPPPPPPPP	RLS(0.999)S(0.998)AS(0.902)T(0.079)GKPPLS(0.022)VEDDFEK	4	4	0.13161			13828;13830;13832;13833;13834;13835	13834	63841	145480	126220	53383	53580	54172
sp|O75152|ZC11A_HUMAN;sp|A0A1B0GTU1|ZC11B_HUMAN	761;762	sp|O75152|ZC11A_HUMAN	sp|O75152|ZC11A_HUMAN	>sp|O75152|ZC11A_HUMAN Zinc finger CCCH domain-containing protein 11A OS=Homo sapiens OX=9606 GN=ZC3H11A PE=1 SV=3;>sp|A0A1B0GTU1|ZC11B_HUMAN Zinc finger CCCH domain-containing protein 11B OS=Homo sapiens OX=9606 GN=ZC3H11B PE=4 SV=1	0.96502	4.64e-24	125.65	2;3	S	SSSQMSMKTRRLSSASTGKPPLSVEDDFEKL	X;X;X;X;X;X;X;X;X;X;X;X;Phospho (STY);Phospho (STY);X;Phospho (STY);X;X;X;X;X;X;X;X;X;X;X;X;X;X;X	XXXXXXXXXXPPPPPPPPPPPPPPPPPPPPX	RLS(0.816)S(0.185)AS(0.965)T(0.035)GKPPLSVEDDFEK	6	4	-1.0183			13829;13831;13833;13834;13835	13829	67479	122120	108110	49922	45836	43640
sp|O75152|ZC11A_HUMAN	108	sp|O75152|ZC11A_HUMAN	sp|O75152|ZC11A_HUMAN	>sp|O75152|ZC11A_HUMAN Zinc finger CCCH domain-containing protein 11A OS=Homo sapiens OX=9606 GN=ZC3H11A PE=1 SV=3	0.999417	1.78e-06	73.575	1	S	LFLPPSKTVLPTVPESPEEEVKASQLSVQQN	X;X;X;X;X;X;X;X;X;X;X;X;X;X;X;Phospho (STY);X;X;X;X;X;X;X;X;X;X;X;X;X;X;X	XXXXXXXPPPPPPPPPPPPPPPXXXXXXXXX	TVLPT(0.001)VPES(0.999)PEEEVK	9	3	-0.084809			19184	19184	9183.2	14546	12247	7613.2	7057.5	6940.9
sp|O75167|PHAR2_HUMAN	237	sp|O75167|PHAR2_HUMAN	sp|O75167|PHAR2_HUMAN	>sp|O75167|PHAR2_HUMAN Phosphatase and actin regulator 2 OS=Homo sapiens OX=9606 GN=PHACTR2 PE=1 SV=2	0.424857	0.000973135	41.025		S	GSSHSKKTTGSKASASPSTSSTSSRPKASKE	X;X;X;X;X;X;X;X;X;X;X;X;X;X;X;Phospho (STY);X;X;X;X;X;X;X;X;X;X;X;X;X;X;X	XXXXXXXXXXXXPPPPPPPPPPPPPPPXXXX	AS(0.001)AS(0.425)PS(0.425)T(0.077)S(0.025)S(0.025)T(0.014)S(0.004)S(0.004)RPK	4	3	-0.55976				1702	0	0	0	0	0	0
sp|O75167|PHAR2_HUMAN	239	sp|O75167|PHAR2_HUMAN	sp|O75167|PHAR2_HUMAN	>sp|O75167|PHAR2_HUMAN Phosphatase and actin regulator 2 OS=Homo sapiens OX=9606 GN=PHACTR2 PE=1 SV=2	0.424857	0.000973135	41.025		S	SHSKKTTGSKASASPSTSSTSSRPKASKETV	X;X;X;X;X;X;X;X;X;X;X;X;X;X;X;X;X;X;X;X;X;X;X;X;X;X;X;X;X;X;X	XXXXXXXXXXXXXXXXXXXXXXXXXXXXXXX	AS(0.001)AS(0.425)PS(0.425)T(0.077)S(0.025)S(0.025)T(0.014)S(0.004)S(0.004)RPK	6	3	-0.55976				1702	0	0	0	0	0	0
sp|O75167|PHAR2_HUMAN	241	sp|O75167|PHAR2_HUMAN	sp|O75167|PHAR2_HUMAN	>sp|O75167|PHAR2_HUMAN Phosphatase and actin regulator 2 OS=Homo sapiens OX=9606 GN=PHACTR2 PE=1 SV=2	0.296253	0.00558951	30.381		S	SKKTTGSKASASPSTSSTSSRPKASKETVSS	X;X;X;X;X;X;X;X;X;X;X;X;X;X;X;X;X;X;X;X;X;X;X;X;X;X;X;X;X;X;X	XXXXXXXXXXXXXXXXXXXXXXXXXXXXXXX	AS(0.001)AS(0.031)PS(0.05)T(0.296)S(0.296)S(0.081)T(0.081)S(0.081)S(0.081)RPK	8	3	-0.11064				1701	0	0	0	0	0	0
sp|O75190|DNJB6_HUMAN	277	sp|O75190|DNJB6_HUMAN	sp|O75190|DNJB6_HUMAN	>sp|O75190|DNJB6_HUMAN DnaJ homolog subfamily B member 6 OS=Homo sapiens OX=9606 GN=DNAJB6 PE=1 SV=2	1	1.17e-15	118.2	1	S	PPRPASLLRHAPHCLSEEEGEQDRPRAPGPW	X;X;X;X;X;X;X;X;X;X;X;X;X;X;X;Phospho (STY);X;X;X;X;X;X;X;X;X;X;X;X;X;X;X	XXXXXXXXXPPPPPPPPPPPPPPPPPXXXXX	HAPHCLS(1)EEEGEQDRPR	7	4	0.69742			7494	7494	4075.3	6508.3	4119.4	3325.3	2693.2	2760.8
sp|O75348|VATG1_HUMAN	68	sp|O75348|VATG1_HUMAN	sp|O75348|VATG1_HUMAN	>sp|O75348|VATG1_HUMAN V-type proton ATPase subunit G 1 OS=Homo sapiens OX=9606 GN=ATP6V1G1 PE=1 SV=3	0.585711	0.00272676	38.262	1	S	KEFKAKEAAALGSRGSCSTEVEKETQEKMTI	X;X;X;X;X;X;X;X;X;X;X;X;X;X;X;Phospho (STY);X;X;X;X;X;X;X;X;X;X;X;X;X;X;X	XXXXXXXXXXXXXXPPPPPPPPPPPPPPXXX	GS(0.586)CS(0.207)T(0.207)EVEKETQEK	2	3	-0.011924			6923	6923	14967	27763	25906	11150	12213	12690
sp|O75351|VPS4B_HUMAN	102	sp|O75351|VPS4B_HUMAN	sp|O75351|VPS4B_HUMAN	>sp|O75351|VPS4B_HUMAN Vacuolar protein sorting-associated protein 4B OS=Homo sapiens OX=9606 GN=VPS4B PE=1 SV=2	1	3.98e-62	182.96	1	S	VKEGQPSPADEKGNDSDGEGESDDPEKKKLQ	X;X;X;X;X;X;X;X;X;X;X;X;X;X;X;Phospho (STY);X;X;X;X;X;X;X;X;X;X;X;X;X;X;X	XXPPPPPPPPPPPPPPPPPPPPPPPPPPPXX	EGQPSPADEKGNDS(1)DGEGESDDPEKK	14	5	0.67369			4013;4014;4015;4016;4017;4018;4019;4020;4021;4022;4023;4024;4025;4026;4027;4028;4029;4030;4031;6462;6463;6464;6465;6466;6467;6468;6469;6470	4024	488250	555860	563800	383510	302560	301180
sp|O75351|VPS4B_HUMAN	108	sp|O75351|VPS4B_HUMAN	sp|O75351|VPS4B_HUMAN	>sp|O75351|VPS4B_HUMAN Vacuolar protein sorting-associated protein 4B OS=Homo sapiens OX=9606 GN=VPS4B PE=1 SV=2	0.725655	1.27e-11	111.95	1	S	SPADEKGNDSDGEGESDDPEKKKLQNQLQGA	X;X;X;X;X;X;X;X;X;X;X;X;X;X;X;Phospho (STY);X;X;X;X;X;X;X;X;X;X;X;X;X;X;X	XXXXXXPPPPPPPPPPPPPPPXXXXXXXXXX	GNDS(0.274)DGEGES(0.726)DDPEK	10	2	0.10341			6461	6461	10156	9881.1	11787	6020.6	5581.1	5085.1
sp|O75367|H2AY_HUMAN	170	sp|O75367|H2AY_HUMAN	sp|O75367|H2AY_HUMAN	>sp|O75367|H2AY_HUMAN Core histone macro-H2A.1 OS=Homo sapiens OX=9606 GN=H2AFY PE=1 SV=4	0.996	6.27e-08	60.377	2	S	ARKSKKKQGEVSKAASADSTTEGTPADGFTV	X;X;X;X;X;X;X;X;X;X;X;X;X;X;X;Phospho (STY);X;X;Phospho (STY);X;X;X;X;X;X;X;X;X;X;X;X	XXXXXXXXXXXXXPPPPPPPPPPPPPPPPPP	AAS(0.996)ADS(0.754)T(0.211)T(0.036)EGT(0.002)PADGFTVLSTK	3	3	1.0821			239;240;241	239	19205	27146	22286	14826	13405	13186
sp|O75367|H2AY_HUMAN	173	sp|O75367|H2AY_HUMAN	sp|O75367|H2AY_HUMAN	>sp|O75367|H2AY_HUMAN Core histone macro-H2A.1 OS=Homo sapiens OX=9606 GN=H2AFY PE=1 SV=4	0.892191	3.27e-18	107.21	1;2	S	SKKKQGEVSKAASADSTTEGTPADGFTVLST	X;X;X;X;X;X;X;X;X;X;X;X;Phospho (STY);X;X;Phospho (STY);X;X;X;X;X;X;X;X;X;X;X;X;X;X;X	XXXXXXXXXXPPPPPPPPPPPPPPPPPPPPP	AAS(0.984)ADS(0.892)T(0.079)T(0.028)EGT(0.016)PADGFTVLSTK	6	3	0.23077			226;227;232;237;239;240;241	240	79294	90877	80434	53963	48681	42480
sp|O75367|H2AY_HUMAN	138	sp|O75367|H2AY_HUMAN	sp|O75367|H2AY_HUMAN	>sp|O75367|H2AY_HUMAN Core histone macro-H2A.1 OS=Homo sapiens OX=9606 GN=H2AFY PE=1 SV=4	0.895555	0.00222637	52.322	1	S	KLEAIITPPPAKKAKSPSQKKPVSKKAGGKK	X;X;X;X;X;X;X;X;X;X;X;X;X;X;X;Phospho (STY);X;X;X;X;X;X;X;X;X;X;X;X;X;X;X	XXXXXXXXXXXXXPPPPPPPXXXXXXXXXXX	AKS(0.896)PS(0.104)QK	3	3	0.10127			1061;1062	1062	26051	58507	36791	13272	19403	14603
sp|O75369|FLNB_HUMAN	2107	sp|O75369|FLNB_HUMAN	sp|O75369|FLNB_HUMAN	>sp|O75369|FLNB_HUMAN Filamin-B OS=Homo sapiens OX=9606 GN=FLNB PE=1 SV=2	0.998842	1.73e-41	165.98	1	S	EGRVKESITRTSRAPSVATVGSICDLNLKIP	X;X;X;X;X;X;Phospho (STY);X;Phospho (STY);X;X;X;X;X;X;Phospho (STY);X;X;X;X;X;X;X;X;X;X;X;X;X;X;X	XXXXXXXXXXXXXPPPPPPPPPPPPPPPPXX	APS(0.999)VAT(0.001)VGSICDLNLK	3	3	-0.013862			1505;1506;1507;1508;1509	1508	39295	49356	157030	23932	33514	38518
sp|O75369|FLNB_HUMAN	2478	sp|O75369|FLNB_HUMAN	sp|O75369|FLNB_HUMAN	>sp|O75369|FLNB_HUMAN Filamin-B OS=Homo sapiens OX=9606 GN=FLNB PE=1 SV=2	0.993234	8.02e-51	178.11	1	S	VGSPFKAKVTGQRLVSPGSANETSSILVESV	X;X;X;X;X;X;X;X;X;X;X;X;X;X;X;Phospho (STY);X;X;X;X;X;X;X;X;X;X;X;X;X;X;X	XXXXXXXXXXXXXPPPPPPPPPPPPPPPPPP	LVS(0.993)PGS(0.007)ANETSSILVESVTR	3	3	0.17406			11311;11312;11313	11312	20594	27901	23550	16958	17713	15907
sp|O75369|FLNB_HUMAN;sp|P21333|FLNA_HUMAN	2098;2143	sp|O75369|FLNB_HUMAN;sp|P21333|FLNA_HUMAN	sp|P21333|FLNA_HUMAN	>sp|O75369|FLNB_HUMAN Filamin-B OS=Homo sapiens OX=9606 GN=FLNB PE=1 SV=2;>sp|P21333|FLNA_HUMAN Filamin-A OS=Homo sapiens OX=9606 GN=FLNA PE=1 SV=4	0.995412	0.0161192	23.508	1	S	SPFSVKVTGEGRVKESITRRRRAPSVANVGS;SPFTVKISGEGRVKESITRTSRAPSVATVGS	X;X;X;X;X;X;X;X;X;X;X;X;X;X;X;Phospho (STY);X;X;X;X;X;X;X;X;Phospho (STY);X;X;X;X;X;Phospho (STY)	XXXXXXXXXXXXPPPPPPPXXXXXXXXXXXX	VKES(0.995)IT(0.005)R	4	2	0.54337			19876;19877;19879	19879	36829	54788	50657	34994	29093	34075
sp|O75376|NCOR1_HUMAN	158	sp|O75376|NCOR1_HUMAN	sp|O75376|NCOR1_HUMAN	>sp|O75376|NCOR1_HUMAN Nuclear receptor corepressor 1 OS=Homo sapiens OX=9606 GN=NCOR1 PE=1 SV=2	0.823818	4.34e-17	94.795	1	S	AKKDPAFGGKHEAPSSPISGQPCGDDQNASP	X;X;X;X;X;X;X;X;X;X;X;X;X;X;X;Phospho (STY);X;X;X;X;X;X;X;X;X;X;X;X;X;X;X	XXXXXXXXXXPPPPPPPPPPPPPPPPPPPPP	HEAPS(0.174)S(0.824)PIS(0.002)GQPCGDDQNASPSK	6	3	-0.46576			7515;7516;7517	7516	16618	26692	22109	12954	12021	11495
sp|O75376|NCOR1_HUMAN	2120	sp|O75376|NCOR1_HUMAN	sp|O75376|NCOR1_HUMAN	>sp|O75376|NCOR1_HUMAN Nuclear receptor corepressor 1 OS=Homo sapiens OX=9606 GN=NCOR1 PE=1 SV=2	1	0.00180298	56.763	1	S	SQAQSVHHQRPGSRVSPENLVDKSRGSRPGK	X;X;X;X;X;X;X;X;X;X;X;X;X;X;X;Phospho (STY);X;X;X;X;X;X;X;X;X;X;X;X;X;X;X	XXXXXXXXXXXXXXPPPPPPPPPXXXXXXXX	VS(1)PENLVDK	2	2	-0.86207			20227;20228	20228	54676	68963	60087	40482	38651	34817
sp|O75376|NCOR1_HUMAN	1977	sp|O75376|NCOR1_HUMAN	sp|O75376|NCOR1_HUMAN	>sp|O75376|NCOR1_HUMAN Nuclear receptor corepressor 1 OS=Homo sapiens OX=9606 GN=NCOR1 PE=1 SV=2	0.664427	0.00106674	35.379	2	S	SSHRYETPSDAIEVISPASSPAPPQEKLQTY	X;X;X;X;X;X;X;X;X;X;X;X;X;X;X;Phospho (STY);X;X;Phospho (STY);X;X;X;X;X;X;X;X;X;X;X;X	XXXXPPPPPPPPPPPPPPPPPPPPPPPXXXX	Y(0.001)ET(0.001)PS(0.003)DAIEVIS(0.664)PAS(0.665)S(0.665)PAPPQEK	12	4	-0.87821			20532	20532	6336.3	9090.5	6097.3	3996	4067.7	3717.7
sp|O75376|NCOR1_HUMAN	1980	sp|O75376|NCOR1_HUMAN	sp|O75376|NCOR1_HUMAN	>sp|O75376|NCOR1_HUMAN Nuclear receptor corepressor 1 OS=Homo sapiens OX=9606 GN=NCOR1 PE=1 SV=2	0.665287	0.00106674	35.379	2	S	RYETPSDAIEVISPASSPAPPQEKLQTYQPE	X;X;X;X;X;X;X;X;X;X;X;X;Phospho (STY);X;X;Phospho (STY);X;X;X;X;X;X;X;X;X;X;X;X;X;X;X	XPPPPPPPPPPPPPPPPPPPPPPPXXXXXXX	Y(0.001)ET(0.001)PS(0.003)DAIEVIS(0.664)PAS(0.665)S(0.665)PAPPQEK	15	4	-0.87821			20532	20532	6336.3	9090.5	6097.3	3996	4067.7	3717.7
sp|O75376|NCOR1_HUMAN	1981	sp|O75376|NCOR1_HUMAN	sp|O75376|NCOR1_HUMAN	>sp|O75376|NCOR1_HUMAN Nuclear receptor corepressor 1 OS=Homo sapiens OX=9606 GN=NCOR1 PE=1 SV=2	0.665218	0.00106674	35.379	2	S	YETPSDAIEVISPASSPAPPQEKLQTYQPEV	X;X;X;X;X;X;X;X;X;X;X;X;X;X;X;X;X;X;X;X;X;X;X;X;X;X;X;X;X;X;X	XXXXXXXXXXXXXXXXXXXXXXXXXXXXXXX	Y(0.001)ET(0.001)PS(0.003)DAIEVIS(0.664)PAS(0.665)S(0.665)PAPPQEK	16	4	-0.87821			20532	20532	6336.3	9090.5	6097.3	3996	4067.7	3717.7
sp|O75379|VAMP4_HUMAN	30	sp|O75379|VAMP4_HUMAN	sp|O75379|VAMP4_HUMAN	>sp|O75379|VAMP4_HUMAN Vesicle-associated membrane protein 4 OS=Homo sapiens OX=9606 GN=VAMP4 PE=1 SV=2	1	1.98e-50	192.14	1	S	TGSVKSERRNLLEDDSDEEEDFFLRGPSGPR	X;X;X;X;X;X;X;X;X;X;X;X;X;X;X;Phospho (STY);X;X;X;X;X;X;X;X;X;X;X;X;X;X;X	XXXXXXXXPPPPPPPPPPPPPPPPPXXXXXX	RNLLEDDS(1)DEEEDFFLR	8	3	0.47156			11828;11829;11830;11831;11832;11833;13861;13862	13862	72244	93356	96690	60052	55199	50652
sp|O75382|TRIM3_HUMAN	7	sp|O75382|TRIM3_HUMAN	sp|O75382|TRIM3_HUMAN	>sp|O75382|TRIM3_HUMAN Tripartite motif-containing protein 3 OS=Homo sapiens OX=9606 GN=TRIM3 PE=1 SV=2	1	1.07e-11	105.16	1	S	_________MAKREDSPGPEVQPMDKQFLVC	X;X;X;X;X;X;X;X;X;X;X;X;X;X;X;Phospho (STY);X;X;X;X;X;X;X;Oxidation (M);X;X;X;X;X;X;X	XXXXXXXXXXXXPPPPPPPPPPPPPPXXXXX	REDS(1)PGPEVQPMDK	4	3	0.34145			13236;13237;13238;13239;13240	13240	81499	119140	112370	66568	58624	54596
sp|O75396|SC22B_HUMAN	168	sp|O75396|SC22B_HUMAN	sp|O75396|SC22B_HUMAN	>sp|O75396|SC22B_HUMAN Vesicle-trafficking protein SEC22b OS=Homo sapiens OX=9606 GN=SEC22B PE=1 SV=4	0.99998	1.73e-17	108.37	1	S	IEEVLQRGEALSALDSKANNLSSLSKKYRQD	X;X;X;X;X;X;X;X;X;X;X;X;X;X;X;Phospho (STY);X;X;X;X;X;X;X;X;X;X;X;X;X;X;X	XXXXXXXPPPPPPPPPPPPPPPPPPPXXXXX	GEALSALDS(1)KANNLSSLSK	9	3	0.034851			5868;5869;5870;5871;5872	5871	64435	179750	99311	47186	48605	37698
sp|O75396|SC22B_HUMAN	137	sp|O75396|SC22B_HUMAN	sp|O75396|SC22B_HUMAN	>sp|O75396|SC22B_HUMAN Vesicle-trafficking protein SEC22b OS=Homo sapiens OX=9606 GN=SEC22B PE=1 SV=4	0.999704	2.25e-43	190.02	1	S	TKKLYIDSCARRNLGSINTELQDVQRIMVAN	X;X;X;X;X;X;X;X;X;X;X;X;X;X;X;Phospho (STY);X;X;X;X;X;X;X;X;X;X;X;X;X;X;X	XXXXXXXXXXXPPPPPPPPPPPPPPPXXXXX	RNLGS(1)INTELQDVQR	5	3	-0.50459			11807;11808;11809;11810;11811;11812;13859;13860	13860	118680	171250	170030	82238	68486	68654
sp|O75400|PR40A_HUMAN	883	sp|O75400|PR40A_HUMAN	sp|O75400|PR40A_HUMAN	>sp|O75400|PR40A_HUMAN Pre-mRNA-processing factor 40 homolog A OS=Homo sapiens OX=9606 GN=PRPF40A PE=1 SV=2	1	0.000430869	47.791	2;3	S	KSKKHKKKSKKRRHKSDSPESDAEREKDKKE	X;X;X;X;X;X;X;X;X;X;X;X;X;X;X;Phospho (STY);X;Phospho (STY);X;X;Phospho (STY);X;X;X;X;X;X;X;X;X;X	XXXXXXXXXXXXXPPPPPPPPPPPPPPXXXX	HKS(1)DS(1)PES(1)DAEREK	3	3	-0.00063003			7555;7557;7558	7558	24223	54288	34854	15205	12501	13836
sp|O75400|PR40A_HUMAN	885	sp|O75400|PR40A_HUMAN	sp|O75400|PR40A_HUMAN	>sp|O75400|PR40A_HUMAN Pre-mRNA-processing factor 40 homolog A OS=Homo sapiens OX=9606 GN=PRPF40A PE=1 SV=2	1	0.000148629	57.911	2;3	S	KKHKKKSKKRRHKSDSPESDAEREKDKKEKD	X;X;X;X;X;X;X;X;X;X;X;X;X;Phospho (STY);X;Phospho (STY);X;X;Phospho (STY);X;X;X;X;X;X;X;X;X;X;X;X	XXXXXXXXXXXPPPPPPPPPPPPPPXXXXXX	HKS(1)DS(1)PES(1)DAEREK	5	3	-0.00063003			7555;7556;7557;7558;15067;15068	7558	69066	129410	91576	46880	41065	40639
sp|O75400|PR40A_HUMAN	888	sp|O75400|PR40A_HUMAN	sp|O75400|PR40A_HUMAN	>sp|O75400|PR40A_HUMAN Pre-mRNA-processing factor 40 homolog A OS=Homo sapiens OX=9606 GN=PRPF40A PE=1 SV=2	1	0.000148629	57.911	1;2;3	S	KKKSKKRRHKSDSPESDAEREKDKKEKDRES	X;X;X;X;X;X;X;X;X;X;Phospho (STY);X;Phospho (STY);X;X;Phospho (STY);X;X;X;X;X;X;X;X;X;X;X;X;X;X;X	XXXXXXXXPPPPPPPPPPPPPPXXXXXXXXX	HKS(1)DS(1)PES(1)DAEREK	8	3	-0.00063003			7555;7556;7557;7558;15067;15068;15069;15070	7558	93850	172310	133230	63932	56159	56245
sp|O75410|TACC1_HUMAN	276	sp|O75410|TACC1_HUMAN	sp|O75410|TACC1_HUMAN	>sp|O75410|TACC1_HUMAN Transforming acidic coiled-coil-containing protein 1 OS=Homo sapiens OX=9606 GN=TACC1 PE=1 SV=2	0.787396	2.86e-18	103.39	1	S	KASYHFSPEELDENTSPLLGDARFQKSPPDL	X;X;X;X;X;X;X;X;X;X;X;X;X;X;X;Phospho (STY);X;X;X;X;X;X;X;X;X;X;X;X;X;X;X	XPPPPPPPPPPPPPPPPPPPPPPXXXXXXXX	ASYHFSPEELDENT(0.213)S(0.787)PLLGDAR	15	3	0.77881			2038	2038	8210.6	11964	10973	6479.5	6747.5	6224.4
sp|O75410|TACC1_HUMAN	94	sp|O75410|TACC1_HUMAN	sp|O75410|TACC1_HUMAN	>sp|O75410|TACC1_HUMAN Transforming acidic coiled-coil-containing protein 1 OS=Homo sapiens OX=9606 GN=TACC1 PE=1 SV=2	0.737646	1.88e-06	64.593	1	S	DPSLGLAGPGAKSQESQEADEQLVAEVVEKC	X;X;X;X;X;X;X;X;X;X;X;X;X;X;X;Phospho (STY);X;X;X;X;X;X;X;X;X;X;X;X;X;X;X	XXXXXXXXXXXXPPPPPPPPPPPPPPPPPPX	S(0.262)QES(0.738)QEADEQLVAEVVEK	4	3	-4.1958			16697	16697	15484	28325	17547	11311	11389	8840.6
sp|O75420|GGYF1_HUMAN	230	sp|O75420|GGYF1_HUMAN	sp|O75420|GGYF1_HUMAN	>sp|O75420|GGYF1_HUMAN GRB10-interacting GYF protein 1 OS=Homo sapiens OX=9606 GN=GIGYF1 PE=1 SV=2	0.945474	0.00193529	39.939	1	S	LGAGPRRDGDRWRSASPDGGPRSAGWREHGE	X;X;X;X;X;X;X;X;X;X;X;X;X;X;X;Phospho (STY);X;X;X;X;X;X;X;X;X;X;X;X;X;X;X	XXXXXXXXXXXXXPPPPPPPPPXXXXXXXXX	S(0.055)AS(0.945)PDGGPR	3	2	0.199			14834	14834	6093.9	11314	8284.7	4601.2	4303.2	4078.9
sp|O75420|GGYF1_HUMAN	638	sp|O75420|GGYF1_HUMAN	sp|O75420|GGYF1_HUMAN	>sp|O75420|GGYF1_HUMAN GRB10-interacting GYF protein 1 OS=Homo sapiens OX=9606 GN=GIGYF1 PE=1 SV=2	0.98888	0.000781346	90.811	1	S	RGGDQNLLPTMSRSLSVPDSGRLWDVHTSAS	X;X;X;X;X;X;X;X;X;X;X;X;X;X;X;Phospho (STY);X;X;X;X;X;X;X;X;X;X;X;X;X;X;X	XXXXXXXXXXXXXPPPPPPPPPXXXXXXXXX	SLS(0.989)VPDS(0.011)GR	3	2	0.31801			16250;16251;16252	16251	54812	82395	63980	36847	35525	34213
sp|O75427|LRCH4_HUMAN	521	sp|O75427|LRCH4_HUMAN	sp|O75427|LRCH4_HUMAN	>sp|O75427|LRCH4_HUMAN Leucine-rich repeat and calponin homology domain-containing protein 4 OS=Homo sapiens OX=9606 GN=LRCH4 PE=1 SV=2	0.980173	4.9e-17	102.77	1	S	SFLFRSSSQSGSGPSSPDSVLRPRRYPQVPD	X;X;X;X;X;X;X;X;X;X;X;X;X;X;X;Phospho (STY);X;X;X;X;X;X;X;X;X;X;X;X;X;X;X	XXXXXPPPPPPPPPPPPPPPPPPPXXXXXXX	SSSQSGSGPS(0.02)S(0.98)PDSVLRPR	11	3	0.66209			17465;17466	17465	25422	50029	34611	19064	18097	18653
sp|O75446|SAP30_HUMAN	131	sp|O75446|SAP30_HUMAN	sp|O75446|SAP30_HUMAN	>sp|O75446|SAP30_HUMAN Histone deacetylase complex subunit SAP30 OS=Homo sapiens OX=9606 GN=SAP30 PE=1 SV=1	0.999985	1.18e-08	61.589	2	S	KNLIQSVRNRRKRKGSDDDGGDSPVQDIDTP	X;X;X;X;X;X;X;X;X;X;X;X;X;X;X;Phospho (STY);X;X;X;X;X;X;Phospho (STY);X;X;X;X;X;X;X;X	XXXXXXXXXXXXXPPPPPPPPPPPPPPPPPP	KGS(1)DDDGGDS(1)PVQDIDTPEVDLYQLQVNTLR	3	4	-0.87965			9039	9039	5281.7	8580.3	4711.9	4623.9	4482.8	3189.8
sp|O75446|SAP30_HUMAN	138	sp|O75446|SAP30_HUMAN	sp|O75446|SAP30_HUMAN	>sp|O75446|SAP30_HUMAN Histone deacetylase complex subunit SAP30 OS=Homo sapiens OX=9606 GN=SAP30 PE=1 SV=1	0.999853	1.18e-08	61.589	2	S	RNRRKRKGSDDDGGDSPVQDIDTPEVDLYQL	X;X;X;X;X;X;X;X;Phospho (STY);X;X;X;X;X;X;Phospho (STY);X;X;X;X;X;X;X;X;X;X;X;X;X;X;X	XXXXXXPPPPPPPPPPPPPPPPPPPPPPPPP	KGS(1)DDDGGDS(1)PVQDIDTPEVDLYQLQVNTLR	10	4	-0.87965			9039	9039	5281.7	8580.3	4711.9	4623.9	4482.8	3189.8
sp|O75448|MED24_HUMAN	862	sp|O75448|MED24_HUMAN	sp|O75448|MED24_HUMAN	>sp|O75448|MED24_HUMAN Mediator of RNA polymerase II transcription subunit 24 OS=Homo sapiens OX=9606 GN=MED24 PE=1 SV=1	0.831872	3.57e-16	109.87	1	S	FPLDDVQPSKLMRLLSSNEDDANILSSPTDR	X;X;X;X;X;X;X;X;X;X;X;X;X;X;X;Phospho (STY);X;X;X;X;X;X;X;X;X;X;X;X;X;X;X	XXXXXXXXXXXXXPPPPPPPPPPPPPPPPPP	LLS(0.832)S(0.168)NEDDANILSSPTDR	3	3	0.88083			10768	10768	9218.7	12654	10187	8233.2	7134	6423
sp|O75475|PSIP1_HUMAN	129	sp|O75475|PSIP1_HUMAN	sp|O75475|PSIP1_HUMAN	>sp|O75475|PSIP1_HUMAN PC4 and SFRS1-interacting protein OS=Homo sapiens OX=9606 GN=PSIP1 PE=1 SV=1	0.999997	1.74e-19	116.87	1;2	S	ETSVSKEDTDHEEKASNEDVTKAVDITTPKA	X;X;X;X;X;X;X;X;Phospho (STY);X;X;X;X;X;X;Phospho (STY);X;X;X;X;X;X;X;X;X;X;X;X;X;X;X	PPPPPPPPPPPPPPPPPPPPPPXXXXXXXXX	EDTDHEEKAS(1)NEDVTK	10	4	-1.5167			3660;3661;5022;5023;5024;5025;5026	3660	120590	139780	107230	85450	68263	61242
sp|O75475|PSIP1_HUMAN	206	sp|O75475|PSIP1_HUMAN	sp|O75475|PSIP1_HUMAN	>sp|O75475|PSIP1_HUMAN PC4 and SFRS1-interacting protein OS=Homo sapiens OX=9606 GN=PSIP1 PE=1 SV=1	0.739585	0.000237086	48.227	1	S	PKPRGRPKMVKQPCPSESDIITEEDKSKKKG	X;X;X;X;X;X;X;X;X;X;X;X;X;X;X;Phospho (STY);X;X;X;X;X;X;X;X;X;X;X;X;X;X;X	XXXXXXXXXXXPPPPPPPPPPPPPPPXXXXX	QPCPS(0.74)ES(0.26)DIITEEDK	5	3	-0.11435			12665	12665	15555	26205	21575	12990	12652	11307
sp|O75475|PSIP1_HUMAN	106	sp|O75475|PSIP1_HUMAN	sp|O75475|PSIP1_HUMAN	>sp|O75475|PSIP1_HUMAN PC4 and SFRS1-interacting protein OS=Homo sapiens OX=9606 GN=PSIP1 PE=1 SV=1	0.965919	3.84e-22	135.7	1	S	KFSSQQAATKQSNASSDVEVEEKETSVSKED	X;X;X;X;X;X;X;X;X;X;X;X;X;X;X;Phospho (STY);X;X;X;X;X;X;X;X;X;X;X;X;X;X;X	XXXXXXXXXXPPPPPPPPPPPPPPPPPPPPP	QSNAS(0.034)S(0.966)DVEVEEK	6	2	-0.10317			12844;12845;12846;12847	12846	62909	71957	55015	44399	36407	31713
sp|O75475|PSIP1_HUMAN	177	sp|O75475|PSIP1_HUMAN	sp|O75475|PSIP1_HUMAN	>sp|O75475|PSIP1_HUMAN PC4 and SFRS1-interacting protein OS=Homo sapiens OX=9606 GN=PSIP1 PE=1 SV=1	0.897295	4.8e-06	51.583	1	S	AGVVTTATASVNLKVSPKRGRPAATEVKIPK	X;X;X;X;X;X;X;X;X;X;X;X;X;X;X;Phospho (STY);X;X;X;X;X;X;X;X;X;X;X;X;X;X;X	PPPPPPPPPPPPPPPPPPXXXXXXXXXXXXX	QVETEEAGVVT(0.004)T(0.004)AT(0.009)AS(0.085)VNLKVS(0.897)PK	22	4	-1.271			12914	12914	10328	17012	13488	8879.5	7957.7	8846.6
sp|O75475|PSIP1_HUMAN	273	sp|O75475|PSIP1_HUMAN	sp|O75475|PSIP1_HUMAN	>sp|O75475|PSIP1_HUMAN PC4 and SFRS1-interacting protein OS=Homo sapiens OX=9606 GN=PSIP1 PE=1 SV=1	0.909957	2.67e-17	100.83	2	S	ESKRKNLAKTGVTSTSDSEEEGDDQEGEKKR	X;X;X;X;X;X;X;X;X;X;X;X;X;X;Phospho (STY);Phospho (STY);X;Phospho (STY);X;X;X;X;X;X;X;X;X;X;X;X;X	XXXXXXXXXPPPPPPPPPPPPPPPPPPPPPX	T(0.003)GVT(0.034)S(0.037)T(0.113)S(0.91)DS(0.902)EEEGDDQEGEKK	7	3	1.3013			18400;18403;18404;18405	18405	55226	78768	55388	42671	35453	32420
sp|O75475|PSIP1_HUMAN	275	sp|O75475|PSIP1_HUMAN	sp|O75475|PSIP1_HUMAN	>sp|O75475|PSIP1_HUMAN PC4 and SFRS1-interacting protein OS=Homo sapiens OX=9606 GN=PSIP1 PE=1 SV=1	0.96613	6.62e-25	123.54	1;2	S	KRKNLAKTGVTSTSDSEEEGDDQEGEKKRKG	X;X;X;X;X;X;X;X;X;X;X;X;Phospho (STY);Phospho (STY);X;Phospho (STY);X;X;X;X;X;X;X;X;X;X;X;X;X;X;X	XXXXXXXPPPPPPPPPPPPPPPPPPPPPXXX	TGVTS(0.001)T(0.005)S(0.028)DS(0.966)EEEGDDQEGEK	9	3	1.5088			18400;18401;18402;18403;18404;18405	18402	74907	110920	79120	61204	49736	45887
sp|O75494|SRS10_HUMAN	209	sp|O75494|SRS10_HUMAN	sp|O75494|SRS10_HUMAN	>sp|O75494|SRS10_HUMAN Serine/arginine-rich splicing factor 10 OS=Homo sapiens OX=9606 GN=SRSF10 PE=1 SV=1	0.969172	0.00483435	41.377	1	S	KSRSRSASHTKTRGTSKTDSKTHYKSGSRYE	X;X;X;X;X;X;X;X;X;X;X;X;X;X;X;Phospho (STY);X;X;X;X;X;X;X;X;X;X;X;X;X;X;X	XXXXXXXXXXXXXPPPPPPPPXXXXXXXXXX	GT(0.009)S(0.969)KT(0.02)DS(0.001)K	3	2	0.01742			7366;7367	7366	19690	40810	33668	14746	13153	9262.5
sp|O75494|SRS10_HUMAN	131	sp|O75494|SRS10_HUMAN	sp|O75494|SRS10_HUMAN	>sp|O75494|SRS10_HUMAN Serine/arginine-rich splicing factor 10 OS=Homo sapiens OX=9606 GN=SRSF10 PE=1 SV=1	1	0.000101617	91.575	2	S	YRRSRSRSYERRRSRSRSFDYNYRRSYSPRN	X;X;X;X;X;X;X;X;X;X;X;X;X;X;X;Phospho (STY);X;Phospho (STY);X;X;X;X;X;X;X;X;X;X;X;X;X	XXXXXXXXXXXXXXXPPPPPPPPPXXXXXXX	S(1)RS(1)FDYNYR	1	2	0.1597			16930;16931;16932;16933;16934	16931	52935	78353	64738	39492	32432	31235
sp|O75494|SRS10_HUMAN	133	sp|O75494|SRS10_HUMAN	sp|O75494|SRS10_HUMAN	>sp|O75494|SRS10_HUMAN Serine/arginine-rich splicing factor 10 OS=Homo sapiens OX=9606 GN=SRSF10 PE=1 SV=1	0.999999	0.000101617	91.575	2	S	RSRSRSYERRRSRSRSFDYNYRRSYSPRNSR	X;X;X;X;X;X;X;X;X;X;X;X;X;Phospho (STY);X;Phospho (STY);X;X;X;X;X;X;X;X;X;X;X;X;X;X;X	XXXXXXXXXXXXXPPPPPPPPPXXXXXXXXX	S(1)RS(1)FDYNYR	3	2	0.1597			16930;16931;16932;16933;16934	16931	52935	78353	64738	39492	32432	31235
sp|O75494|SRS10_HUMAN	251	sp|O75494|SRS10_HUMAN	sp|O75494|SRS10_HUMAN	>sp|O75494|SRS10_HUMAN Serine/arginine-rich splicing factor 10 OS=Homo sapiens OX=9606 GN=SRSF10 PE=1 SV=1	0.497015	0.0144494	27.72		S	KSQSRSQSRSRSKSRSRSWTSPKSSGH____	X;X;X;X;X;X;X;X;X;X;X;X;X;X;X;Phospho (STY);X;X;X;Phospho (STY);X;X;X;X;X;X;X;X;X;X;X	XXXXXXXXXXXXXXXPPPPPPPPXXXXXXXX	S(0.497)RS(0.497)WT(0.557)S(0.449)PK	1	3	0.10785				17044	0	0	0	0	0	0
sp|O75494|SRS10_HUMAN	253	sp|O75494|SRS10_HUMAN	sp|O75494|SRS10_HUMAN	>sp|O75494|SRS10_HUMAN Serine/arginine-rich splicing factor 10 OS=Homo sapiens OX=9606 GN=SRSF10 PE=1 SV=1	0.497015	0.0144494	27.72		S	QSRSQSRSRSKSRSRSWTSPKSSGH______	X;X;X;X;X;X;X;X;X;X;X;X;X;X;X;X;X;X;X;X;X;X;X;X;X;X;X;X;X;X;X	XXXXXXXXXXXXXXXXXXXXXXXXXXXXXXX	S(0.497)RS(0.497)WT(0.557)S(0.449)PK	3	3	0.10785				17044	0	0	0	0	0	0
sp|O75528|TADA3_HUMAN	298	sp|O75528|TADA3_HUMAN	sp|O75528|TADA3_HUMAN	>sp|O75528|TADA3_HUMAN Transcriptional adapter 3 OS=Homo sapiens OX=9606 GN=TADA3 PE=1 SV=1	0.912534	6.8e-08	108.18	1	S	PDMSGKESGADGASTSPRNQNKPFSVPHTKS	X;X;X;X;X;X;X;X;X;X;X;X;X;X;X;Phospho (STY);X;X;X;X;X;X;X;X;X;X;X;X;X;X;X	XXXXXXPPPPPPPPPPPPXXXXXXXXXXXXX	ESGADGAS(0.009)T(0.079)S(0.913)PR	10	2	0.66875			4801;4802;4803	4803	12896	28974	19833	9743.7	9114.2	8878.5
sp|O75563|SKAP2_HUMAN	283	sp|O75563|SKAP2_HUMAN	sp|O75563|SKAP2_HUMAN	>sp|O75563|SKAP2_HUMAN Src kinase-associated phosphoprotein 2 OS=Homo sapiens OX=9606 GN=SKAP2 PE=1 SV=1	0.975299	0.000350302	49.276	2	S	EEDSAPVKVEEQRKMSQDSVHHTSGDKSTDY	X;X;X;X;X;X;X;X;X;X;X;X;X;X;X;Phospho (STY);X;X;Phospho (STY);X;X;X;X;X;X;X;X;X;X;X;X	XXXXXXXXXXXXXPPPPPPPPPPPPPPXXXX	KMS(0.975)QDS(0.828)VHHT(0.184)S(0.013)GDK	3	4	-0.31926			9347	9347	10569	16358	13246	6648.8	6325	5783.7
sp|O75563|SKAP2_HUMAN	286	sp|O75563|SKAP2_HUMAN	sp|O75563|SKAP2_HUMAN	>sp|O75563|SKAP2_HUMAN Src kinase-associated phosphoprotein 2 OS=Homo sapiens OX=9606 GN=SKAP2 PE=1 SV=1	0.828168	0.000350302	49.276	2	S	SAPVKVEEQRKMSQDSVHHTSGDKSTDYANF	X;X;X;X;X;X;X;X;X;X;X;X;Phospho (STY);X;X;Phospho (STY);X;X;X;X;X;X;X;X;X;X;X;X;X;X;X	XXXXXXXXXXPPPPPPPPPPPPPPXXXXXXX	KMS(0.975)QDS(0.828)VHHT(0.184)S(0.013)GDK	6	4	-0.31926			9347	9347	10569	16358	13246	6648.8	6325	5783.7
sp|O75569|PRKRA_HUMAN	18	sp|O75569|PRKRA_HUMAN	sp|O75569|PRKRA_HUMAN	>sp|O75569|PRKRA_HUMAN Interferon-inducible double-stranded RNA-dependent protein kinase activator A OS=Homo sapiens OX=9606 GN=PRKRA PE=1 SV=1	0.994487	6.35e-31	151.5	1	S	QSRHRAEAPPLEREDSGTFSLGKMITAKPGK	X;X;X;X;X;X;X;X;X;X;X;X;X;X;X;Phospho (STY);X;X;X;X;X;X;X;X;X;X;X;X;X;X;X	XXXXXPPPPPPPPPPPPPPPPPPXXXXXXXX	AEAPPLEREDS(0.994)GT(0.005)FSLGK	11	3	-0.28531			556;557;558;559;560;561;3653;3655	556	218800	525490	329270	146210	154320	124160
sp|O75582|KS6A5_HUMAN	376	sp|O75582|KS6A5_HUMAN	sp|O75582|KS6A5_HUMAN	>sp|O75582|KS6A5_HUMAN Ribosomal protein S6 kinase alpha-5 OS=Homo sapiens OX=9606 GN=RPS6KA5 PE=1 SV=1	0.991947	0.000144721	52.874	2	S	PAALPQSSEKLFQGYSFVAPSILFKRNAAVI	X;X;X;X;X;X;X;X;X;X;X;X;X;X;X;Phospho (STY);X;X;X;X;Phospho (STY);X;X;X;X;X;X;X;X;X;X	XXXXXXXXXXPPPPPPPPPPPPPPPXXXXXX	LFQGY(0.012)S(0.992)FVAPS(0.996)ILFK	6	3	1.87			10366;10367	10366	4126.7	10748	11972	2274.1	4386.5	4562.2
sp|O75582|KS6A5_HUMAN	381	sp|O75582|KS6A5_HUMAN	sp|O75582|KS6A5_HUMAN	>sp|O75582|KS6A5_HUMAN Ribosomal protein S6 kinase alpha-5 OS=Homo sapiens OX=9606 GN=RPS6KA5 PE=1 SV=1	0.999904	0.000144721	52.874	2	S	QSSEKLFQGYSFVAPSILFKRNAAVIDPLQF	X;X;X;X;X;X;X;X;X;X;Phospho (STY);X;X;X;X;Phospho (STY);X;X;X;X;X;X;X;X;X;X;X;X;X;X;X	XXXXXPPPPPPPPPPPPPPPXXXXXXXXXXX	LFQGY(0.008)S(0.992)FVAPS(1)ILFK	11	3	1.6852			10366;10367	10367	4126.7	10748	11972	2274.1	4386.5	4562.2
sp|O75592|MYCB2_HUMAN	2871	sp|O75592|MYCB2_HUMAN	sp|O75592|MYCB2_HUMAN	>sp|O75592|MYCB2_HUMAN E3 ubiquitin-protein ligase MYCBP2 OS=Homo sapiens OX=9606 GN=MYCBP2 PE=1 SV=4	0.692825	3.44e-06	65.321	1	S	APVKTKLDPPRERSKSDSYTLDPDTLRKKKM	X;X;X;X;X;X;X;X;X;X;X;X;X;X;X;Phospho (STY);X;X;X;X;X;X;X;X;X;X;X;X;X;X;X	XXXXXXXXXXXXXPPPPPPPPPPPPPPXXXX	S(0.159)KS(0.693)DS(0.146)YT(0.002)LDPDTLR	3	3	0.03732			15820;15821	15820	51983	83418	59579	39410	38410	38546
sp|O75643|U520_HUMAN	225	sp|O75643|U520_HUMAN	sp|O75643|U520_HUMAN	>sp|O75643|U520_HUMAN U5 small nuclear ribonucleoprotein 200 kDa helicase OS=Homo sapiens OX=9606 GN=SNRNP200 PE=1 SV=2	1	0.00101193	32.73	1	S	EEGDEDVYGEVREEASDDDMEGDEAVVRCTL	X;X;X;X;X;X;X;X;X;X;X;X;X;X;X;Phospho (STY);X;X;X;X;X;X;X;X;X;X;X;X;X;X;X	XXXXXXXXXXXXPPPPPPPPPPPPPPPPXXX	EEAS(1)DDDMEGDEAVVR	4	3	-0.089952			3668	3668	14847	24390	22107	12156	11195	9604.9
sp|O75643|U520_HUMAN	2133	sp|O75643|U520_HUMAN	sp|O75643|U520_HUMAN	>sp|O75643|U520_HUMAN U5 small nuclear ribonucleoprotein 200 kDa helicase OS=Homo sapiens OX=9606 GN=SNRNP200 PE=1 SV=2	0.999996	0.000376833	55.264	3	S	QEYKFSVDVKEAETDSDSD____________	X;X;X;X;X;X;X;X;X;X;X;X;X;Phospho (STY);X;Phospho (STY);X;Phospho (STY);X;X;X;X;X;X;X;X;X;X;X;X;X	XXXXPPPPPPPPPPPPPPPXXXXXXXXXXXX	FSVDVKEAET(1)DS(1)DS(1)D	12	3	0.030405			5528;5529	5528	5800.4	9764.6	6991.1	4847.2	4315.8	4147.3
sp|O75643|U520_HUMAN	2135	sp|O75643|U520_HUMAN	sp|O75643|U520_HUMAN	>sp|O75643|U520_HUMAN U5 small nuclear ribonucleoprotein 200 kDa helicase OS=Homo sapiens OX=9606 GN=SNRNP200 PE=1 SV=2	0.999998	0.000376833	55.264	3	S	YKFSVDVKEAETDSDSD______________	X;X;X;X;X;X;X;X;X;X;X;Phospho (STY);X;Phospho (STY);X;Phospho (STY);X;X;X;X;X;X;X;X;X;X;X;X;X;X;X	XXPPPPPPPPPPPPPPPXXXXXXXXXXXXXX	FSVDVKEAET(1)DS(1)DS(1)D	14	3	0.030405			5528;5529	5528	5800.4	9764.6	6991.1	4847.2	4315.8	4147.3
sp|O75674|TM1L1_HUMAN	323	sp|O75674|TM1L1_HUMAN	sp|O75674|TM1L1_HUMAN	>sp|O75674|TM1L1_HUMAN TOM1-like protein 1 OS=Homo sapiens OX=9606 GN=TOM1L1 PE=1 SV=2	0.966887	1.44e-21	94.384	1	S	SEPSAPSQDLLDLSPSPRMPRATLGELNTMN	X;X;X;X;X;X;X;X;X;X;X;X;X;X;X;Phospho (STY);X;X;X;X;X;X;X;X;X;X;X;X;X;X;X	PPPPPPPPPPPPPPPPPPXXXXXXXXXXXXX	EATNTTSEPSAPSQDLLDLS(0.033)PS(0.967)PR	22	3	-1.6701			3526;3527	3527	17354	23818	17746	13478	11637	11463
sp|O75676|KS6A4_HUMAN	343	sp|O75676|KS6A4_HUMAN	sp|O75676|KS6A4_HUMAN	>sp|O75676|KS6A4_HUMAN Ribosomal protein S6 kinase alpha-4 OS=Homo sapiens OX=9606 GN=RPS6KA4 PE=1 SV=1	0.999728	4.92e-06	61.276	2	S	VGNFAEEFTRLEPVYSPPGSPPPGDPRIFQG	X;X;X;X;X;X;X;X;X;X;X;X;X;X;X;Phospho (STY);X;X;X;Phospho (STY);X;X;X;X;X;X;X;X;X;X;X	XXXXXXXXXXPPPPPPPPPPPPPPPPPXXXX	LEPVYS(1)PPGS(1)PPPGDPR	6	3	-0.77645			10332;10333;10334	10333	21054	39847	34566	17187	18609	17464
sp|O75676|KS6A4_HUMAN	347	sp|O75676|KS6A4_HUMAN	sp|O75676|KS6A4_HUMAN	>sp|O75676|KS6A4_HUMAN Ribosomal protein S6 kinase alpha-4 OS=Homo sapiens OX=9606 GN=RPS6KA4 PE=1 SV=1	0.999812	4.92e-06	61.276	2	S	AEEFTRLEPVYSPPGSPPPGDPRIFQGYSFV	X;X;X;X;X;X;X;X;X;X;X;Phospho (STY);X;X;X;Phospho (STY);X;X;X;X;X;X;X;X;X;X;X;X;X;X;X	XXXXXXPPPPPPPPPPPPPPPPPXXXXXXXX	LEPVYS(1)PPGS(1)PPPGDPR	10	3	-0.77645			10332;10333;10334	10333	21054	39847	34566	17187	18609	17464
sp|O75688|PPM1B_HUMAN	386	sp|O75688|PPM1B_HUMAN	sp|O75688|PPM1B_HUMAN	>sp|O75688|PPM1B_HUMAN Protein phosphatase 1B OS=Homo sapiens OX=9606 GN=PPM1B PE=1 SV=1	0.942086	6.71e-08	85.175	1	S	NPHRESDGASDEAEESGSQGKLVEALRQMRI	X;X;X;X;X;X;X;X;X;X;X;X;X;X;X;Phospho (STY);X;X;X;X;X;X;X;X;X;X;X;X;X;X;X	XXXXPPPPPPPPPPPPPPPPPXXXXXXXXXX	ESDGASDEAEES(0.942)GS(0.058)QGK	12	3	0.18776			4766	4766	11976	14660	12929	9452.2	7298.2	7396.6
sp|O75694|NU155_HUMAN	992	sp|O75694|NU155_HUMAN	sp|O75694|NU155_HUMAN	>sp|O75694|NU155_HUMAN Nuclear pore complex protein Nup155 OS=Homo sapiens OX=9606 GN=NUP155 PE=1 SV=1	0.992957	0.000333714	76.554	1	S	DTLQELVNQSKAAPQSPSVPKKPGPPVLSSD	X;X;X;X;X;X;X;X;X;X;X;X;X;X;X;Phospho (STY);X;X;X;X;X;X;X;X;X;X;X;X;X;X;X	XXXXXXXXXXXPPPPPPPPPPXXXXXXXXXX	AAPQS(0.993)PS(0.007)VPK	5	3	0.17997			198;199;200;201;202	198	63687	147220	110050	51314	52216	49192
sp|O75764|TCEA3_HUMAN	115	sp|O75764|TCEA3_HUMAN	sp|O75764|TCEA3_HUMAN	>sp|O75764|TCEA3_HUMAN Transcription elongation factor A protein 3 OS=Homo sapiens OX=9606 GN=TCEA3 PE=1 SV=2	0.99893	0.000500249	44.564	1	S	EKGLECSDWKPEAGLSPPRKKREDPKTRRDS	X;X;X;X;X;X;X;X;X;X;X;X;X;X;X;Phospho (STY);X;X;X;X;X;X;X;X;X;X;X;X;X;X;Phospho (STY)	XXPPPPPPPPPPPPPPPPPXXXXXXXXXXXX	GLECS(0.001)DWKPEAGLS(0.999)PPR	14	3	-1.1242			6267	6267	17779	49770	26740	15427	13029	11624
sp|O75764|TCEA3_HUMAN	130	sp|O75764|TCEA3_HUMAN	sp|O75764|TCEA3_HUMAN	>sp|O75764|TCEA3_HUMAN Transcription elongation factor A protein 3 OS=Homo sapiens OX=9606 GN=TCEA3 PE=1 SV=2	0.998401	0.00176611	74.704	1	S	SPPRKKREDPKTRRDSVDSKSSASSSPKRPS	Phospho (STY);X;X;X;X;X;X;X;X;X;X;X;X;X;X;Phospho (STY);X;X;X;X;X;X;X;X;Phospho (STY);Phospho (STY);X;X;X;X;X	XXXXXXXXXXXXXPPPPPPPXXXXXXXXXXX	RDS(0.998)VDS(0.002)K	3	2	0.41314			13210;13211;13212;13213;13214	13214	36425	155620	75264	26282	30245	25673
sp|O75764|TCEA3_HUMAN	139	sp|O75764|TCEA3_HUMAN	sp|O75764|TCEA3_HUMAN	>sp|O75764|TCEA3_HUMAN Transcription elongation factor A protein 3 OS=Homo sapiens OX=9606 GN=TCEA3 PE=1 SV=2	0.751874	0.00388785	54.955	1	S	PKTRRDSVDSKSSASSSPKRPSVERSNSSKS	X;X;X;X;X;X;Phospho (STY);X;X;X;X;X;X;X;X;Phospho (STY);X;X;X;X;X;X;X;X;X;X;X;X;X;X;X	XXXXXXXXXXXPPPPPPPPXXXXXXXXXXXX	S(0.002)S(0.002)AS(0.142)S(0.752)S(0.102)PK	5	3	0.20608			17096	17096	9287.9	32529	15776	6996.8	8384.6	5995.8
sp|O75764|TCEA3_HUMAN	140	sp|O75764|TCEA3_HUMAN	sp|O75764|TCEA3_HUMAN	>sp|O75764|TCEA3_HUMAN Transcription elongation factor A protein 3 OS=Homo sapiens OX=9606 GN=TCEA3 PE=1 SV=2	0.971334	0.00190353	52.313	1	S	KTRRDSVDSKSSASSSPKRPSVERSNSSKSK	X;X;X;X;X;Phospho (STY);X;X;X;X;X;X;X;X;X;Phospho (STY);X;X;X;X;X;X;X;X;X;X;X;X;X;X;X	XXXXXXXXXXPPPPPPPPXXXXXXXXXXXXX	SSAS(0.001)S(0.028)S(0.971)PK	6	2	0.34291			17092;17093;17095	17092	19855	73183	39991	14534	14789	13356
sp|O75821|EIF3G_HUMAN	42	sp|O75821|EIF3G_HUMAN	sp|O75821|EIF3G_HUMAN	>sp|O75821|EIF3G_HUMAN Eukaryotic translation initiation factor 3 subunit G OS=Homo sapiens OX=9606 GN=EIF3G PE=1 SV=2	0.84225	3.51e-18	101.95	1	S	TSELLKGIPLATGDTSPEPELLPGAPLPPPK	X;X;X;X;X;X;X;X;X;X;X;X;X;X;X;Phospho (STY);X;X;X;X;X;X;X;X;X;X;X;X;X;X;X	XXXXXXPPPPPPPPPPPPPPPPPPPPPPPPP	GIPLAT(0.002)GDT(0.156)S(0.842)PEPELLPGAPLPPPK	10	3	0.22731			6197;6198;6201;6202;6204	6204	30110	45701	37286	23211	24380	20724
sp|O75909|CCNK_HUMAN	340	sp|O75909|CCNK_HUMAN	sp|O75909|CCNK_HUMAN	>sp|O75909|CCNK_HUMAN Cyclin-K OS=Homo sapiens OX=9606 GN=CCNK PE=1 SV=2	1	5.6e-06	83.717	1	S	PQPSSPRQVKRAVVVSPKEENKAAEPPPPKI	X;X;X;Phospho (STY);Phospho (STY);X;X;X;X;X;X;X;X;X;X;Phospho (STY);X;X;X;X;X;X;X;X;X;X;X;X;X;X;X	XXXXXXXXXXXPPPPPPPPPPPXXXXXXXXX	AVVVS(1)PKEENK	5	3	0.017052			2305;2306;2307;2308	2308	112330	167450	166250	87559	72513	73096
sp|O75909|CCNK_HUMAN	324	sp|O75909|CCNK_HUMAN	sp|O75909|CCNK_HUMAN	>sp|O75909|CCNK_HUMAN Cyclin-K OS=Homo sapiens OX=9606 GN=CCNK PE=1 SV=2	0.99627	0.0014649	50.765	2	S	QPAQQQQPAQQPKKPSPQPSSPRQVKRAVVV	X;X;X;X;X;X;X;X;X;X;X;X;X;X;X;Phospho (STY);X;X;X;Phospho (STY);Phospho (STY);X;X;X;X;X;X;X;X;X;X	XXXXXXXXXXXXXPPPPPPPPPPXXXXXXXX	KPS(0.996)PQPS(0.357)S(0.647)PR	3	2	-0.20889			9511;9512;9513;9514	9511	25694	40733	39575	21103	17898	17232
sp|O75909|CCNK_HUMAN	328	sp|O75909|CCNK_HUMAN	sp|O75909|CCNK_HUMAN	>sp|O75909|CCNK_HUMAN Cyclin-K OS=Homo sapiens OX=9606 GN=CCNK PE=1 SV=2	0.66681	0.0014649	50.765	2	S	QQQPAQQPKKPSPQPSSPRQVKRAVVVSPKE	X;X;X;X;X;X;X;X;X;X;X;Phospho (STY);X;X;X;Phospho (STY);X;X;X;X;X;X;X;X;X;X;X;Phospho (STY);X;X;X	XXXXXXXXXPPPPPPPPPPXXXXXXXXXXXX	KPS(0.988)PQPS(0.667)S(0.345)PR	7	2	-0.75614			9513;9514	9513	9376.8	15837	16181	7628.6	6397.8	6547.9
sp|O75909|CCNK_HUMAN	329	sp|O75909|CCNK_HUMAN	sp|O75909|CCNK_HUMAN	>sp|O75909|CCNK_HUMAN Cyclin-K OS=Homo sapiens OX=9606 GN=CCNK PE=1 SV=2	0.896064	0.00138309	50.765	1;2	S	QQPAQQPKKPSPQPSSPRQVKRAVVVSPKEE	X;X;X;X;X;X;X;X;X;X;Phospho (STY);X;X;X;X;Phospho (STY);X;X;X;X;X;X;X;X;X;X;Phospho (STY);X;X;X;X	XXXXXXXXPPPPPPPPPPXXXXXXXXXXXXX	KPS(0.002)PQPS(0.102)S(0.896)PR	8	3	-0.027294			9508;9509;9510;9511;9512;9514	9509	53855	98352	81334	40543	36549	33547
sp|O75925|PIAS1_HUMAN	503	sp|O75925|PIAS1_HUMAN	sp|O75925|PIAS1_HUMAN	>sp|O75925|PIAS1_HUMAN E3 SUMO-protein ligase PIAS1 OS=Homo sapiens OX=9606 GN=PIAS1 PE=1 SV=2	0.993256	3.15e-06	72.478	1	S	SPLNNKGILSLPHQASPVSRTPSLPAVDTSY	X;X;X;X;X;X;X;X;X;X;X;X;X;X;X;Phospho (STY);X;X;X;X;X;X;X;X;X;X;X;X;X;X;X	XXXXXXPPPPPPPPPPPPPPXXXXXXXXXXX	GILSLPHQAS(0.993)PVS(0.006)R	10	3	-0.7374			6194;6195	6195	18392	27808	26475	15569	14670	12954
sp|O75925|PIAS1_HUMAN	466	sp|O75925|PIAS1_HUMAN	sp|O75925|PIAS1_HUMAN	>sp|O75925|PIAS1_HUMAN E3 SUMO-protein ligase PIAS1 OS=Homo sapiens OX=9606 GN=PIAS1 PE=1 SV=2	0.985185	1.42e-09	65.778	3	S	SNKNKKVEVIDLTIDSSSDEEEEEPSAKRTC	X;X;X;X;X;X;X;X;X;X;X;X;X;X;X;Phospho (STY);Phospho (STY);Phospho (STY);X;X;X;X;X;X;X;X;X;X;X;X;X	XXXXXPPPPPPPPPPPPPPPPPPPPPPPXXX	KVEVIDLT(0.044)IDS(0.985)S(0.985)S(0.985)DEEEEEPSAK	11	3	3.4282			9931;9932	9932	6197.1	9747.7	6574.8	6046.5	5669	4476.9
sp|O75925|PIAS1_HUMAN	467	sp|O75925|PIAS1_HUMAN	sp|O75925|PIAS1_HUMAN	>sp|O75925|PIAS1_HUMAN E3 SUMO-protein ligase PIAS1 OS=Homo sapiens OX=9606 GN=PIAS1 PE=1 SV=2	0.985185	1.42e-09	65.778	3	S	NKNKKVEVIDLTIDSSSDEEEEEPSAKRTCP	X;X;X;X;X;X;X;X;X;X;X;X;X;X;Phospho (STY);Phospho (STY);Phospho (STY);X;X;X;X;X;X;X;X;X;X;X;X;X;X	XXXXPPPPPPPPPPPPPPPPPPPPPPPXXXX	KVEVIDLT(0.044)IDS(0.985)S(0.985)S(0.985)DEEEEEPSAK	12	3	3.4282			9931;9932	9932	6197.1	9747.7	6574.8	6046.5	5669	4476.9
sp|O75925|PIAS1_HUMAN	468	sp|O75925|PIAS1_HUMAN	sp|O75925|PIAS1_HUMAN	>sp|O75925|PIAS1_HUMAN E3 SUMO-protein ligase PIAS1 OS=Homo sapiens OX=9606 GN=PIAS1 PE=1 SV=2	0.985185	1.42e-09	65.778	3	S	KNKKVEVIDLTIDSSSDEEEEEPSAKRTCPS	X;X;X;X;X;X;X;X;X;X;X;X;X;Phospho (STY);Phospho (STY);Phospho (STY);X;X;X;X;X;X;X;X;X;X;X;X;X;X;X	XXXPPPPPPPPPPPPPPPPPPPPPPPXXXXX	KVEVIDLT(0.044)IDS(0.985)S(0.985)S(0.985)DEEEEEPSAK	13	3	3.4282			9931;9932	9932	6197.1	9747.7	6574.8	6046.5	5669	4476.9
sp|O75971|SNPC5_HUMAN	96	sp|O75971|SNPC5_HUMAN	sp|O75971|SNPC5_HUMAN	>sp|O75971|SNPC5_HUMAN snRNA-activating protein complex subunit 5 OS=Homo sapiens OX=9606 GN=SNAPC5 PE=1 SV=1	0.499992	0.00420477	50.242	1	S	KSHVTEEEEEEEEEESDS_____________	X;X;X;X;X;X;X;X;X;X;X;X;X;X;X;Phospho (STY);X;X;X;X;X;X;X;X;X;X;X;X;X;X;X	XPPPPPPPPPPPPPPPPPXXXXXXXXXXXXX	SHVTEEEEEEEEEES(0.5)DS(0.5)	15	2	-2.1299			15657;15658	15657	1014.5	2953.6	1751.9	941.03	1053.9	826.82
sp|O75971|SNPC5_HUMAN	98	sp|O75971|SNPC5_HUMAN	sp|O75971|SNPC5_HUMAN	>sp|O75971|SNPC5_HUMAN snRNA-activating protein complex subunit 5 OS=Homo sapiens OX=9606 GN=SNAPC5 PE=1 SV=1	0.499992	0.00420477	50.242	1	S	HVTEEEEEEEEEESDS_______________	X;X;X;X;X;X;X;X;X;X;X;X;X;X;X;X;X;X;X;X;X;X;X;X;X;X;X;X;X;X;X	XXXXXXXXXXXXXXXXXXXXXXXXXXXXXXX	SHVTEEEEEEEEEES(0.5)DS(0.5)	17	2	-2.1299			15657;15658	15657	1014.5	2953.6	1751.9	941.03	1053.9	826.82
sp|O75995|SASH3_HUMAN	108	sp|O75995|SASH3_HUMAN	sp|O75995|SASH3_HUMAN	>sp|O75995|SASH3_HUMAN SAM and SH3 domain-containing protein 3 OS=Homo sapiens OX=9606 GN=SASH3 PE=1 SV=2	0.333921	2.22e-05	42.289		S	VKALSEEMADTLEEGSASPTSPDYSLDSPGP	X;X;X;X;X;X;X;X;X;X;X;X;X;X;X;Phospho (STY);X;Phospho (STY);X;X;X;X;X;X;X;X;X;X;X;X;X	XXPPPPPPPPPPPPPPPPPPPPPPPPPPPPP	ALSEEMADT(0.003)LEEGS(0.334)AS(0.334)PT(0.334)S(0.334)PDY(0.306)S(0.334)LDS(0.021)PGPEK	14	4	1.4185				1204	0	0	0	0	0	0
sp|O75995|SASH3_HUMAN	110	sp|O75995|SASH3_HUMAN	sp|O75995|SASH3_HUMAN	>sp|O75995|SASH3_HUMAN SAM and SH3 domain-containing protein 3 OS=Homo sapiens OX=9606 GN=SASH3 PE=1 SV=2	0.333921	2.22e-05	42.289		S	ALSEEMADTLEEGSASPTSPDYSLDSPGPEK	X;X;X;X;X;X;X;X;X;X;X;X;X;Phospho (STY);X;Phospho (STY);X;X;X;X;X;X;X;X;X;X;X;X;X;X;X	PPPPPPPPPPPPPPPPPPPPPPPPPPPPPPP	ALSEEMADT(0.003)LEEGS(0.334)AS(0.334)PT(0.334)S(0.334)PDY(0.306)S(0.334)LDS(0.021)PGPEK	16	4	1.4185				1204	0	0	0	0	0	0
sp|O75995|SASH3_HUMAN	113	sp|O75995|SASH3_HUMAN	sp|O75995|SASH3_HUMAN	>sp|O75995|SASH3_HUMAN SAM and SH3 domain-containing protein 3 OS=Homo sapiens OX=9606 GN=SASH3 PE=1 SV=2	0.333921	2.22e-05	42.289		S	EEMADTLEEGSASPTSPDYSLDSPGPEKMAL	X;X;X;X;X;X;X;X;X;X;X;X;X;X;X;X;X;X;X;X;X;X;X;X;X;X;X;X;X;X;X	XXXXXXXXXXXXXXXXXXXXXXXXXXXXXXX	ALSEEMADT(0.003)LEEGS(0.334)AS(0.334)PT(0.334)S(0.334)PDY(0.306)S(0.334)LDS(0.021)PGPEK	19	4	1.4185				1204	0	0	0	0	0	0
sp|O75995|SASH3_HUMAN	117	sp|O75995|SASH3_HUMAN	sp|O75995|SASH3_HUMAN	>sp|O75995|SASH3_HUMAN SAM and SH3 domain-containing protein 3 OS=Homo sapiens OX=9606 GN=SASH3 PE=1 SV=2	0.333921	2.22e-05	42.289		S	DTLEEGSASPTSPDYSLDSPGPEKMALAFSE	X;X;X;X;X;X;X;X;X;X;X;X;X;X;X;X;X;X;X;X;X;X;X;X;X;X;X;X;X;X;X	XXXXXXXXXXXXXXXXXXXXXXXXXXXXXXX	ALSEEMADT(0.003)LEEGS(0.334)AS(0.334)PT(0.334)S(0.334)PDY(0.306)S(0.334)LDS(0.021)PGPEK	23	4	1.4185				1204	0	0	0	0	0	0
sp|O75995|SASH3_HUMAN	320	sp|O75995|SASH3_HUMAN	sp|O75995|SASH3_HUMAN	>sp|O75995|SASH3_HUMAN SAM and SH3 domain-containing protein 3 OS=Homo sapiens OX=9606 GN=SASH3 PE=1 SV=2	0.979881	4.75e-120	220.16	2	S	KLLTAAELLLDYDTGSEEAEEGAESSQEPVA	X;X;X;X;X;X;X;X;X;X;X;X;X;Phospho (STY);X;Phospho (STY);X;X;X;X;X;X;X;X;X;X;X;X;X;X;X	XPPPPPPPPPPPPPPPPPPPPPPPPPPPPPP	LLTAAELLLDY(0.04)DT(0.98)GS(0.98)EEAEEGAESSQEPVAHTVSEPK	15	4	1.8869			10771;10772;10773;10774	10772	96173	113650	96672	64687	81034	68768
sp|O75995|SASH3_HUMAN	38	sp|O75995|SASH3_HUMAN	sp|O75995|SASH3_HUMAN	>sp|O75995|SASH3_HUMAN SAM and SH3 domain-containing protein 3 OS=Homo sapiens OX=9606 GN=SASH3 PE=1 SV=2	0.627488	0.00134086	46.032	1	S	QRSSSFKDFAKSKPSSPVVSEKEFNLDDNIP	X;X;Phospho (STY);X;Phospho (STY);X;X;X;X;X;X;X;X;X;X;Phospho (STY);X;X;X;X;X;X;X;X;X;X;X;X;X;X;X	XXXXXXXXXXXPPPPPPPPPPPXXXXXXXXX	S(0.009)KPS(0.209)S(0.627)PVVS(0.155)EK	5	3	1.1605			15809	15809	29998	31018	30940	21331	17889	17985
sp|O75995|SASH3_HUMAN	42	sp|O75995|SASH3_HUMAN	sp|O75995|SASH3_HUMAN	>sp|O75995|SASH3_HUMAN SAM and SH3 domain-containing protein 3 OS=Homo sapiens OX=9606 GN=SASH3 PE=1 SV=2	0.462627	0.000389388	56.893		S	SFKDFAKSKPSSPVVSEKEFNLDDNIPEDDS	Phospho (STY);X;X;X;X;X;X;X;X;X;X;X;X;X;X;Phospho (STY);X;X;X;X;X;X;X;X;X;X;X;X;X;X;X	XXXXXXXPPPPPPPPPPPXXXXXXXXXXXXX	S(0.004)KPS(0.112)S(0.422)PVVS(0.463)EK	9	3	0.71858				15810	0	0	0	0	0	0
sp|O75995|SASH3_HUMAN	25	sp|O75995|SASH3_HUMAN	sp|O75995|SASH3_HUMAN	>sp|O75995|SASH3_HUMAN SAM and SH3 domain-containing protein 3 OS=Homo sapiens OX=9606 GN=SASH3 PE=1 SV=2	0.972343	0.000402378	68.82	2	S	SEKEPTQKKKLSLQRSSSFKDFAKSKPSSPV	X;X;X;X;X;X;X;X;X;X;X;X;X;X;X;Phospho (STY);X;Phospho (STY);X;X;X;X;X;X;X;X;X;X;Phospho (STY);X;X	XXXXXXXXXXXXXXXPPPPPPPPPXXXXXXX	S(0.972)S(0.055)S(0.972)FKDFAK	1	3	-0.52582			17360;17361;17362	17360	75253	89307	79515	42869	92043	61421
sp|O75995|SASH3_HUMAN	27	sp|O75995|SASH3_HUMAN	sp|O75995|SASH3_HUMAN	>sp|O75995|SASH3_HUMAN SAM and SH3 domain-containing protein 3 OS=Homo sapiens OX=9606 GN=SASH3 PE=1 SV=2	0.972343	0.000402378	68.82	1;2	S	KEPTQKKKLSLQRSSSFKDFAKSKPSSPVVS	X;X;X;X;X;X;X;X;X;X;X;X;X;Phospho (STY);X;Phospho (STY);X;X;X;X;X;X;X;X;X;X;Phospho (STY);X;X;X;Phospho (STY)	XXXXXXXXXXXXXPPPPPPPPPXXXXXXXXX	S(0.972)S(0.055)S(0.972)FKDFAK	3	3	-0.52582			17360;17361;17362;17363;17364;17365	17360	159500	192080	154570	95161	141140	99732
sp|O76021|RL1D1_HUMAN	361	sp|O76021|RL1D1_HUMAN	sp|O76021|RL1D1_HUMAN	>sp|O76021|RL1D1_HUMAN Ribosomal L1 domain-containing protein 1 OS=Homo sapiens OX=9606 GN=RSL1D1 PE=1 SV=3	0.994908	2.81e-20	127.48	1	S	KKRGRGKAQVKATNESEDEIPQLVPIGKKTP	X;X;X;X;X;X;X;X;X;X;X;X;X;X;X;Phospho (STY);X;X;X;X;X;X;X;X;X;X;X;X;X;X;X	XXXXXXXXXXXPPPPPPPPPPPPPPPPPXXX	AT(0.005)NES(0.995)EDEIPQLVPIGK	5	4	0.5859			2100;2101;2102;2103;2104;2105	2105	91329	154940	118030	46751	63728	58175
sp|O76024|WFS1_HUMAN	32	sp|O76024|WFS1_HUMAN	sp|O76024|WFS1_HUMAN	>sp|O76024|WFS1_HUMAN Wolframin OS=Homo sapiens OX=9606 GN=WFS1 PE=1 SV=2	0.999794	4.67e-07	95.887	1	S	PAPQPQARSRLNATASLEQERSERPRAPGPQ	X;X;X;X;X;X;X;X;X;X;X;X;X;X;X;Phospho (STY);X;X;X;X;X;X;X;X;X;X;X;X;X;X;X	XXXXXXXXXXPPPPPPPPPPPXXXXXXXXXX	LNATAS(1)LEQER	6	3	0.2865			10783;10784;10785;10786	10786	45302	45285	33475	27970	24082	23473
sp|O76024|WFS1_HUMAN	235	sp|O76024|WFS1_HUMAN	sp|O76024|WFS1_HUMAN	>sp|O76024|WFS1_HUMAN Wolframin OS=Homo sapiens OX=9606 GN=WFS1 PE=1 SV=2	0.866561	0.0077355	14.754	1	S	PKSLQKQRRMLERLVSSESKNYIALDDFVEI	X;X;X;X;X;X;X;X;X;X;X;X;X;X;X;Phospho (STY);X;X;X;X;X;X;X;X;X;X;X;X;X;X;X	XXXXXXXXXXXXXPPPPPPPXXXXXXXXXXX	LVS(0.867)S(0.133)ESK	3	3	-0.32138			11318	11318	4541.9	5577.9	3521.1	3272.2	3384.6	3200.1
sp|O76024|WFS1_HUMAN	236	sp|O76024|WFS1_HUMAN	sp|O76024|WFS1_HUMAN	>sp|O76024|WFS1_HUMAN Wolframin OS=Homo sapiens OX=9606 GN=WFS1 PE=1 SV=2	0.74628	0.01067	26.081	1	S	KSLQKQRRMLERLVSSESKNYIALDDFVEIT	X;X;X;X;X;X;X;X;X;X;X;X;X;X;X;Phospho (STY);X;X;X;X;X;X;X;X;X;X;X;X;X;X;X	XXXXXXXXXXXXPPPPPPPXXXXXXXXXXXX	LVS(0.244)S(0.746)ES(0.01)K	4	2	0.40325			11316;11317;11319	11317	135140	142680	95651	96254	92106	77678
sp|O76041|NEBL_HUMAN	953	sp|O76041|NEBL_HUMAN	sp|O76041|NEBL_HUMAN	>sp|O76041|NEBL_HUMAN Nebulette OS=Homo sapiens OX=9606 GN=NEBL PE=1 SV=1	0.999704	0.00144192	42.725	1	S	YMHQTSVSSMRSMQHSPNLRTYRAMYDYSAQ	X;X;X;X;X;X;X;X;X;X;X;X;Oxidation (M);X;X;Phospho (STY);X;X;X;X;X;X;X;X;X;X;X;X;X;X;X	XXXXXXXXXXXPPPPPPPPPXXXXXXXXXXX	SMQHS(1)PNLR	5	2	-0.037397			16282;16283;16284;16285;16286	16286	43070	69392	42087	33403	44094	34628
sp|O76094|SRP72_HUMAN	620	sp|O76094|SRP72_HUMAN	sp|O76094|SRP72_HUMAN	>sp|O76094|SRP72_HUMAN Signal recognition particle subunit SRP72 OS=Homo sapiens OX=9606 GN=SRP72 PE=1 SV=3	0.447873	5.61e-11	61.852		S	ATAGASSELDASKTVSSPPTSPRPGSAATVS	X;X;X;X;X;X;X;X;X;X;X;X;X;X;X;Phospho (STY);X;X;X;Phospho (STY);X;X;X;X;X;X;X;X;X;X;X	XXXXXXXXXXXXXPPPPPPPPPPPPPPPPPP	T(0.12)VS(0.448)S(0.446)PPT(0.504)S(0.45)PRPGS(0.029)AAT(0.003)VSASTSNIIPPR	3	4	0.83082				19216	0	0	0	0	0	0
sp|O76094|SRP72_HUMAN	621	sp|O76094|SRP72_HUMAN	sp|O76094|SRP72_HUMAN	>sp|O76094|SRP72_HUMAN Signal recognition particle subunit SRP72 OS=Homo sapiens OX=9606 GN=SRP72 PE=1 SV=3	0.68457	5.61e-11	61.852	2	S	TAGASSELDASKTVSSPPTSPRPGSAATVSA	X;X;X;X;X;X;X;X;X;X;X;X;X;X;X;Phospho (STY);X;X;Phospho (STY);Phospho (STY);X;X;X;X;X;X;X;X;X;X;X	XXXXXXXXXXXXPPPPPPPPPPPPPPPPPPP	T(0.022)VS(0.213)S(0.685)PPT(0.339)S(0.741)PRPGSAATVSASTSNIIPPR	4	3	0.7301			19218;19220	19218	21967	30044	19290	17099	15496	14804
sp|O76094|SRP72_HUMAN	625	sp|O76094|SRP72_HUMAN	sp|O76094|SRP72_HUMAN	>sp|O76094|SRP72_HUMAN Signal recognition particle subunit SRP72 OS=Homo sapiens OX=9606 GN=SRP72 PE=1 SV=3	0.741223	3.46e-07	55.038	2	S	SSELDASKTVSSPPTSPRPGSAATVSASTSN	X;X;X;X;X;X;X;X;X;X;X;Phospho (STY);X;X;X;Phospho (STY);X;X;X;X;X;X;X;X;X;X;X;X;X;X;X	XXXXXXXXPPPPPPPPPPPPPPPPPPPPPPP	T(0.022)VS(0.213)S(0.685)PPT(0.339)S(0.741)PRPGSAATVSASTSNIIPPR	8	3	0.7301			19218;19220	19218	21967	30044	19290	17099	15496	14804
sp|O94769|ECM2_HUMAN	213	sp|O94769|ECM2_HUMAN	sp|O94769|ECM2_HUMAN	>sp|O94769|ECM2_HUMAN Extracellular matrix protein 2 OS=Homo sapiens OX=9606 GN=ECM2 PE=2 SV=1	0.999948	0.000584448	42.617	1	S	PQVGMDRIVRKEALQSEEDEEVKEEDTEQKR	X;X;X;X;X;X;X;X;X;X;X;X;X;X;X;Phospho (STY);X;X;X;X;X;X;X;X;X;X;X;X;X;X;X	XXXXXXXXXXXPPPPPPPPPPPPPPPPPPPP	EALQS(1)EEDEEVKEEDTEQKR	5	4	0.24714			3474	3474	7789.8	11805	9438	7404.7	5270	7530.5
sp|O94776|MTA2_HUMAN	587	sp|O94776|MTA2_HUMAN	sp|O94776|MTA2_HUMAN	>sp|O94776|MTA2_HUMAN Metastasis-associated protein MTA2 OS=Homo sapiens OX=9606 GN=MTA2 PE=1 SV=1	0.981404	0.00549974	22.262	1	S	FSANGRPLASGIRSSSQPAAKRQKLNPADAP	X;X;X;X;X;X;X;X;X;X;X;X;X;X;X;Phospho (STY);X;X;X;X;X;X;X;X;X;X;X;X;X;X;X	XXXXXXXXXXXXXPPPPPPPPXXXXXXXXXX	SS(0.018)S(0.981)QPAAK	3	2	0.27453			17464	17464	11620	30636	22652	8515.2	9258.5	7665.4
sp|O94804|STK10_HUMAN	448	sp|O94804|STK10_HUMAN	sp|O94804|STK10_HUMAN	>sp|O94804|STK10_HUMAN Serine/threonine-protein kinase 10 OS=Homo sapiens OX=9606 GN=STK10 PE=1 SV=1	0.599397	9.27e-08	80.828	2	S	QGGDLSPAANRSQKASQSRPNSSALETLGGE	X;X;X;X;X;Phospho (STY);X;X;X;X;X;X;X;X;X;Phospho (STY);X;X;X;X;X;Phospho (STY);X;X;X;X;X;X;X;X;X	XXXXXXXXXXXXXXPPPPPPPPPPPPPPPPP	AS(0.599)QS(0.403)RPNS(0.943)S(0.055)ALETLGGEK	2	3	0.39229			1893	1893	19799	12746	11627	13897	8001.5	8202.2
sp|O94804|STK10_HUMAN	454	sp|O94804|STK10_HUMAN	sp|O94804|STK10_HUMAN	>sp|O94804|STK10_HUMAN Serine/threonine-protein kinase 10 OS=Homo sapiens OX=9606 GN=STK10 PE=1 SV=1	0.946291	4.48e-15	86.739	1;2	S	PAANRSQKASQSRPNSSALETLGGEKLANGS	X;X;X;X;X;X;X;X;X;Phospho (STY);X;X;X;X;X;Phospho (STY);X;X;X;X;X;X;X;X;X;X;X;X;X;X;X	XXXXXXXXPPPPPPPPPPPPPPPPPPXXXXX	ASQS(0.001)RPNS(0.946)S(0.051)ALET(0.002)LGGEK	8	3	0.66297			1890;1891;1892;1893	1890	79231	66977	53763	62914	40878	42309
sp|O94804|STK10_HUMAN	514	sp|O94804|STK10_HUMAN	sp|O94804|STK10_HUMAN	>sp|O94804|STK10_HUMAN Serine/threonine-protein kinase 10 OS=Homo sapiens OX=9606 GN=STK10 PE=1 SV=1	0.996262	0.000211535	66.256	1	S	GTNLSTDLSLNKEMGSLSIKDPKLYKKTLKR	X;X;X;X;X;X;X;X;X;X;X;X;X;X;X;Phospho (STY);X;X;X;X;X;X;X;X;X;X;X;X;X;X;X	XXXXXXXXXXXXPPPPPPPPPPPXXXXXXXX	EMGS(0.996)LS(0.004)IKDPK	4	3	-0.75814			4426;4427;4428	4426	114260	110900	70496	78252	70741	50203
sp|O94804|STK10_HUMAN	438	sp|O94804|STK10_HUMAN	sp|O94804|STK10_HUMAN	>sp|O94804|STK10_HUMAN Serine/threonine-protein kinase 10 OS=Homo sapiens OX=9606 GN=STK10 PE=1 SV=1	1	1.23e-35	181.39	1	S	QVAQEKQVAEQGGDLSPAANRSQKASQSRPN	X;X;X;X;X;X;X;X;X;X;X;X;X;X;X;Phospho (STY);X;X;X;X;X;X;X;X;X;Phospho (STY);X;X;X;X;X	XXXXXXPPPPPPPPPPPPPPPXXXXXXXXXX	QVAEQGGDLS(1)PAANR	10	3	-0.057715			12902;12903;12904;12905;12906;12907	12907	73602	67628	52415	58389	50882	38916
sp|O94811|TPPP_HUMAN	32	sp|O94811|TPPP_HUMAN	sp|O94811|TPPP_HUMAN	>sp|O94811|TPPP_HUMAN Tubulin polymerization-promoting protein OS=Homo sapiens OX=9606 GN=TPPP PE=1 SV=1	1	1.17e-72	176.78	1;2	S	KSPGDPSKDRAAKRLSLESEGAGEGAAASPE	X;Phospho (STY);X;X;X;X;X;X;X;X;X;X;X;X;X;Phospho (STY);X;X;Phospho (STY);X;X;X;X;X;X;X;X;X;X;X;X	XXXXXXXXXXXXXPPPPPPPPPPPPPPPPPP	RLS(1)LES(1)EGAGEGAAASPELSALEEAFR	3	4	0.43675			13787;13788;13789;13790;13791;13792;13793;13794;13795;13796;13797	13797	78842	88052	64479	68021	54740	52041
sp|O94811|TPPP_HUMAN	35	sp|O94811|TPPP_HUMAN	sp|O94811|TPPP_HUMAN	>sp|O94811|TPPP_HUMAN Tubulin polymerization-promoting protein OS=Homo sapiens OX=9606 GN=TPPP PE=1 SV=1	1	2.16e-27	113.49	2	S	GDPSKDRAAKRLSLESEGAGEGAAASPELSA	X;X;X;X;X;X;X;X;X;X;X;X;Phospho (STY);X;X;Phospho (STY);X;X;X;X;X;X;X;X;X;X;X;X;X;X;X	XXXXXXXXXXPPPPPPPPPPPPPPPPPPPPP	RLS(1)LES(1)EGAGEGAAASPELSALEEAFR	6	4	-0.034621			13793;13794;13795;13796;13797	13795	22880	28954	22617	18481	18431	17820
sp|O94811|TPPP_HUMAN	18	sp|O94811|TPPP_HUMAN	sp|O94811|TPPP_HUMAN	>sp|O94811|TPPP_HUMAN Tubulin polymerization-promoting protein OS=Homo sapiens OX=9606 GN=TPPP PE=1 SV=1	0.811992	0.00637038	24.443	1	S	DKAKPAKAANRTPPKSPGDPSKDRAAKRLSL	X;X;X;X;X;X;X;X;X;X;X;X;X;X;X;Phospho (STY);X;X;X;X;X;X;X;X;X;X;X;X;X;Phospho (STY);X	XXXXXXXXXXXPPPPPPPPPPPPPXXXXXXX	T(0.017)PPKS(0.812)PGDPS(0.171)KDR	5	3	0.16529			18668	18668	10728	21276	14462	9187.2	10922	10639
sp|O94819|KBTBB_HUMAN	107	sp|O94819|KBTBB_HUMAN	sp|O94819|KBTBB_HUMAN	>sp|O94819|KBTBB_HUMAN Kelch repeat and BTB domain-containing protein 11 OS=Homo sapiens OX=9606 GN=KBTBD11 PE=1 SV=1	1	0.000291621	46.692	1	S	ASPEERACPEEPAAPSPEPRVWLEDPASPEE	X;X;X;X;X;X;X;X;X;X;X;X;X;X;X;Phospho (STY);X;X;X;X;X;X;X;X;X;X;X;X;X;X;X	XXXXXXPPPPPPPPPPPPPPXXXXXXXXXXX	ACPEEPAAPS(1)PEPR	10	3	0.21261			387	387	12529	17740	15439	11233	10583	9596
sp|O94819|KBTBB_HUMAN	310	sp|O94819|KBTBB_HUMAN	sp|O94819|KBTBB_HUMAN	>sp|O94819|KBTBB_HUMAN Kelch repeat and BTB domain-containing protein 11 OS=Homo sapiens OX=9606 GN=KBTBD11 PE=1 SV=1	0.998413	9.26e-05	52.198	2	S	HLLAAALGPAGERAGSRPQSPSGDADARGDA	X;X;X;X;X;X;X;X;X;X;X;X;X;X;X;Phospho (STY);X;X;X;Phospho (STY);X;X;X;X;X;X;X;X;X;X;X	XXXXXXXXXXXXXPPPPPPPPPPPPPPPXXX	AGS(0.998)RPQS(0.778)PS(0.224)GDADAR	3	3	-0.44799			966;967;968;969;970;971	969	27213	35792	35689	18348	19588	20925
sp|O94819|KBTBB_HUMAN	314	sp|O94819|KBTBB_HUMAN	sp|O94819|KBTBB_HUMAN	>sp|O94819|KBTBB_HUMAN Kelch repeat and BTB domain-containing protein 11 OS=Homo sapiens OX=9606 GN=KBTBD11 PE=1 SV=1	0.987185	1.87e-06	62.598	1;2	S	AALGPAGERAGSRPQSPSGDADARGDAAVYC	X;X;X;X;X;X;X;X;X;X;X;Phospho (STY);X;X;X;Phospho (STY);X;X;X;X;X;X;X;X;X;X;X;X;X;X;X	XXXXXXXXXPPPPPPPPPPPPPPPXXXXXXX	AGS(0.001)RPQS(0.987)PS(0.012)GDADAR	7	2	-0.67129			960;961;962;963;964;965;966;967;968;969;970;971	965	48761	71114	71212	35972	37950	42475
sp|O94826|TOM70_HUMAN	91	sp|O94826|TOM70_HUMAN	sp|O94826|TOM70_HUMAN	>sp|O94826|TOM70_HUMAN Mitochondrial import receptor subunit TOM70 OS=Homo sapiens OX=9606 GN=TOMM70 PE=1 SV=1	0.982951	2.77e-45	152.18	1	S	GLKRNSERKTPEGRASPAPGSGHPEGPGAHL	X;X;X;X;X;X;X;X;X;X;X;X;X;X;X;Phospho (STY);X;X;X;X;X;X;X;X;X;X;X;X;X;X;X	XXXXXXXXXXXXXXPPPPPPPPPPPPPPPPP	AS(0.983)PAPGS(0.017)GHPEGPGAHLDMNSLDR	2	3	-0.54825			1844;1845;1846;1847;1848;1849;1850;1851	1848	83400	145970	106610	68609	60151	58168
sp|O94826|TOM70_HUMAN	96	sp|O94826|TOM70_HUMAN	sp|O94826|TOM70_HUMAN	>sp|O94826|TOM70_HUMAN Mitochondrial import receptor subunit TOM70 OS=Homo sapiens OX=9606 GN=TOMM70 PE=1 SV=1	0.563957	0.000235772	42.323	1	S	SERKTPEGRASPAPGSGHPEGPGAHLDMNSL	X;X;X;X;X;X;X;X;X;X;X;X;X;X;X;Phospho (STY);X;X;X;X;X;X;X;X;X;X;X;Oxidation (M);X;X;X	XXXXXXXXXPPPPPPPPPPPPPPPPPPPPPP	AS(0.436)PAPGS(0.564)GHPEGPGAHLDMNSLDR	7	4	-0.18568			1852	1852	11163	18939	13453	7837	6421.8	6695.2
sp|O94851|MICA2_HUMAN	515	sp|O94851|MICA2_HUMAN	sp|O94851|MICA2_HUMAN	>sp|O94851|MICA2_HUMAN [F-actin]-monooxygenase MICAL2 OS=Homo sapiens OX=9606 GN=MICAL2 PE=1 SV=1	0.989473	0.00530589	8.0838	1	S	RLGSVRRSVNLSRKESDIRPSKLLTWCQQQT	X;X;X;X;X;X;X;X;X;X;X;X;X;X;X;Phospho (STY);X;X;X;X;X;X;X;X;X;X;X;X;X;X;X	XXXXXXXXXXXXXPPPPPPPPPXXXXXXXXX	KES(0.989)DIRPS(0.011)K	3	4	1.3248			8817	8817	7918.6	10713	11112	4906.6	5212.3	4029.1
sp|O94854|K0754_HUMAN	666	sp|O94854|K0754_HUMAN	sp|O94854|K0754_HUMAN	>sp|O94854|K0754_HUMAN Uncharacterized protein KIAA0754 OS=Homo sapiens OX=9606 GN=KIAA0754 PE=2 SV=4	0.713018	5.65e-09	106.26	1	S	LNVASSEGGEMERRDSDSFLNIFPEKQVTKA	X;X;X;X;X;X;X;X;X;X;X;X;X;X;X;Phospho (STY);X;X;X;X;X;X;X;X;X;X;X;X;X;X;X	XXXXXXXXXXXXXPPPPPPPPPPPPPXXXXX	RDS(0.713)DS(0.287)FLNIFPEK	3	3	-1.3717			13132;13133	13133	18672	19629	14812	15272	12965	10793
sp|O94864|ST65G_HUMAN	108	sp|O94864|ST65G_HUMAN	sp|O94864|ST65G_HUMAN	>sp|O94864|ST65G_HUMAN STAGA complex 65 subunit gamma OS=Homo sapiens OX=9606 GN=SUPT7L PE=1 SV=1	0.988135	7.07e-07	60.079	1	S	GVKTEESEPLPSCPGSPPLPDDLLPLDCKNP	X;X;X;X;X;X;X;X;X;X;X;X;X;X;X;Phospho (STY);X;X;X;X;X;X;X;X;X;X;X;X;X;X;X	XXXPPPPPPPPPPPPPPPPPPPPPPPPPPXX	TEESEPLPS(0.012)CPGS(0.988)PPLPDDLLPLDCK	13	4	-0.35932			18223;18224	18223	9479.2	19452	16285	8828.7	9680.3	8563.7
sp|O94874|UFL1_HUMAN	458	sp|O94874|UFL1_HUMAN	sp|O94874|UFL1_HUMAN	>sp|O94874|UFL1_HUMAN E3 UFM1-protein ligase 1 OS=Homo sapiens OX=9606 GN=UFL1 PE=1 SV=2	0.999998	1.29e-43	170.09	1	S	YKIKKVKKKGRKDDDSDDESQSSHTGKKKPE	X;X;X;X;X;X;X;X;X;X;X;X;X;X;X;Phospho (STY);X;X;X;X;X;X;X;X;X;X;X;X;X;X;X	XXXXXXXXXPPPPPPPPPPPPPPPPPPXXXX	GRKDDDS(1)DDESQSSHTGK	7	3	-0.3538			2465;2466;2467;6851;6852;6853;6854;6855;6856;6857;6858;6859;8511;8512;8513;8514;8515;8516;8517;8518;8519	6852	143380	217050	148530	100880	87923	90376
sp|O94874|UFL1_HUMAN	790	sp|O94874|UFL1_HUMAN	sp|O94874|UFL1_HUMAN	>sp|O94874|UFL1_HUMAN E3 UFM1-protein ligase 1 OS=Homo sapiens OX=9606 GN=UFL1 PE=1 SV=2	0.895237	0.00192464	69.744	1	S	LSSSIKDLVLKSRKSSVTEE___________	X;X;X;X;X;X;X;X;X;X;X;X;X;X;X;Phospho (STY);X;X;X;X;X;X;X;X;X;X;X;X;X;X;X	XXXXXXXXXXXXXPPPPPPPXXXXXXXXXXX	KS(0.016)S(0.895)VT(0.088)EE	3	2	0.29368			9817;9818;9819	9819	29606	43653	31511	21853	20647	18363
sp|O94875|SRBS2_HUMAN	165	sp|O94875|SRBS2_HUMAN	sp|O94875|SRBS2_HUMAN	>sp|O94875|SRBS2_HUMAN Sorbin and SH3 domain-containing protein 2 OS=Homo sapiens OX=9606 GN=SORBS2 PE=1 SV=3	0.5	1.15e-07	61.73	1	S	SKSHSDNSPNAFKDASSPVPPPHVPPPVPPL	X;X;X;X;X;X;X;X;X;X;X;X;X;X;X;Phospho (STY);X;X;X;X;X;X;X;X;X;X;X;X;X;X;X	XXXXXXXXXXXXXPPPPPPPPPPPPPPPPPP	DAS(0.5)S(0.5)PVPPPHVPPPVPPLRPR	3	4	-0.028382			2446	2446	9855.3	11508	10930	8227.5	6857.7	6406.7
sp|O94875|SRBS2_HUMAN	166	sp|O94875|SRBS2_HUMAN	sp|O94875|SRBS2_HUMAN	>sp|O94875|SRBS2_HUMAN Sorbin and SH3 domain-containing protein 2 OS=Homo sapiens OX=9606 GN=SORBS2 PE=1 SV=3	0.6434	1.15e-07	61.73	1	S	KSHSDNSPNAFKDASSPVPPPHVPPPVPPLR	X;X;X;X;X;X;X;X;X;X;X;X;X;X;X;Phospho (STY);X;X;X;X;X;X;X;X;X;X;X;X;X;X;X	XXXXXXXXXXXXPPPPPPPPPPPPPPPPPPP	DAS(0.357)S(0.643)PVPPPHVPPPVPPLRPR	4	4	-0.090377			2446;2447	2447	16821	20633	18429	13203	11586	10969
sp|O94875|SRBS2_HUMAN	259	sp|O94875|SRBS2_HUMAN	sp|O94875|SRBS2_HUMAN	>sp|O94875|SRBS2_HUMAN Sorbin and SH3 domain-containing protein 2 OS=Homo sapiens OX=9606 GN=SORBS2 PE=1 SV=3	1	4.99e-05	79.009	1	S	MSSASMASDFRKRRKSEPAVGPPRGLGDQSA	X;X;X;X;X;X;X;X;X;X;X;X;X;X;X;Phospho (STY);X;X;X;X;X;X;X;X;X;X;X;X;X;X;X	XXXXXXXXXXXXXPPPPPPPPPPPXXXXXXX	RKS(1)EPAVGPPR	3	3	0.76906			13707;13708	13708	38656	44820	31744	21933	22504	17413
sp|O94875|SRBS2_HUMAN	298	sp|O94875|SRBS2_HUMAN	sp|O94875|SRBS2_HUMAN	>sp|O94875|SRBS2_HUMAN Sorbin and SH3 domain-containing protein 2 OS=Homo sapiens OX=9606 GN=SORBS2 PE=1 SV=3	0.8162	1.23e-05	79.644	2	S	DLPGSSTTLTKSFTSSSPSSPSRAKGGDDSK	X;X;X;X;X;X;X;X;X;X;X;X;X;X;X;Phospho (STY);X;X;X;Phospho (STY);X;X;X;X;X;X;X;X;X;X;X	XXXXXXXXXXXPPPPPPPPPPPPXXXXXXXX	S(0.002)FT(0.005)S(0.109)S(0.816)S(0.101)PS(0.225)S(0.712)PS(0.03)R	5	2	0.63349			15360;15361	15361	35467	41039	30980	27836	21702	17867
sp|O94875|SRBS2_HUMAN	302	sp|O94875|SRBS2_HUMAN	sp|O94875|SRBS2_HUMAN	>sp|O94875|SRBS2_HUMAN Sorbin and SH3 domain-containing protein 2 OS=Homo sapiens OX=9606 GN=SORBS2 PE=1 SV=3	0.996641	4.13e-11	123.76	1;2	S	SSTTLTKSFTSSSPSSPSRAKGGDDSKICPS	X;X;X;X;X;X;X;X;X;X;X;Phospho (STY);X;X;X;Phospho (STY);X;X;X;X;X;X;X;X;X;X;X;X;X;X;X	XXXXXXXPPPPPPPPPPPPXXXXXXXXXXXX	SFTSSSPS(0.003)S(0.997)PSR	9	2	0.33856			15357;15358;15359;15360;15361	15357	71509	96127	71800	49568	44006	36900
sp|O94875|SRBS2_HUMAN	278	sp|O94875|SRBS2_HUMAN	sp|O94875|SRBS2_HUMAN	>sp|O94875|SRBS2_HUMAN Sorbin and SH3 domain-containing protein 2 OS=Homo sapiens OX=9606 GN=SORBS2 PE=1 SV=3	0.498419	0.00204748	36.201		S	VGPPRGLGDQSASRTSPGRVDLPGSSTTLTK	X;X;X;X;X;X;X;X;X;X;X;X;X;X;X;X;X;X;X;X;X;X;X;X;X;X;X;X;X;X;X	XXXXXXXXXXXXXXXXXXXXXXXXXXXXXXX	T(0.498)S(0.498)PGRVDLPGS(0.001)S(0.001)TTLTK	2	3	0.49855				18988	0	0	0	0	0	0
sp|O94880|PHF14_HUMAN	835	sp|O94880|PHF14_HUMAN	sp|O94880|PHF14_HUMAN	>sp|O94880|PHF14_HUMAN PHD finger protein 14 OS=Homo sapiens OX=9606 GN=PHF14 PE=1 SV=2	1	0.000199368	58.278	1	S	KKIPIRNTRTRGRKRSFVPEEEKHEERVPRE	X;X;X;X;X;X;X;X;X;X;X;X;X;X;X;Phospho (STY);X;X;X;X;X;X;X;X;X;X;X;X;X;X;X	XXXXXXXXXXXXXXXPPPPPPPPPPPPXXXX	S(1)FVPEEEKHEER	1	3	0.8084			15362	15362	12643	19380	17964	9490.7	6727.3	7488
sp|O94885|SASH1_HUMAN	510	sp|O94885|SASH1_HUMAN	sp|O94885|SASH1_HUMAN	>sp|O94885|SASH1_HUMAN SAM and SH3 domain-containing protein 1 OS=Homo sapiens OX=9606 GN=SASH1 PE=1 SV=3	0.830865	0.00520751	34.767	1	S	EHLDKPKLKAGGSVESLRSSLSGQSSMSGQT	X;X;X;X;X;X;X;X;X;X;X;X;X;X;X;Phospho (STY);X;X;X;X;X;X;X;X;X;X;X;X;X;X;X	XXXXXXXXXPPPPPPPPPXXXXXXXXXXXXX	AGGS(0.169)VES(0.831)LR	7	2	0.9111			882	882	18363	19490	18612	14955	12456	10862
sp|O94885|SASH1_HUMAN	248	sp|O94885|SASH1_HUMAN	sp|O94885|SASH1_HUMAN	>sp|O94885|SASH1_HUMAN SAM and SH3 domain-containing protein 1 OS=Homo sapiens OX=9606 GN=SASH1 PE=1 SV=3	0.999835	2.04e-08	105.37	1	S	YPTFDGSSNCNSREQSDDETEESVKFKRLHK	X;X;X;X;X;X;X;X;X;X;X;X;X;X;X;Phospho (STY);X;X;X;X;X;X;X;X;X;X;X;X;X;X;X	XXXXXXXXXXXXXPPPPPPPPPPPPXXXXXX	EQS(1)DDETEESVK	3	3	0.43491			4628;4629	4628	33219	32498	24670	26989	23087	17999
sp|O94885|SASH1_HUMAN	813	sp|O94885|SASH1_HUMAN	sp|O94885|SASH1_HUMAN	>sp|O94885|SASH1_HUMAN SAM and SH3 domain-containing protein 1 OS=Homo sapiens OX=9606 GN=SASH1 PE=1 SV=3	0.999965	0.0036135	67.945	1	S	SCDPPGVTGLNKNRRSLPVSICRSCETLEGP	X;X;X;X;X;X;X;X;X;X;X;X;X;X;X;Phospho (STY);X;X;X;X;X;X;X;X;X;X;X;X;X;X;X	XXXXXXXXXXXXXXXPPPPPPPPXXXXXXXX	S(1)LPVSICR	1	2	-0.65794			16131;16132	16132	37004	42163	34820	29746	24938	22966
sp|O94885|SASH1_HUMAN	387	sp|O94885|SASH1_HUMAN	sp|O94885|SASH1_HUMAN	>sp|O94885|SASH1_HUMAN SAM and SH3 domain-containing protein 1 OS=Homo sapiens OX=9606 GN=SASH1 PE=1 SV=3	0.996994	0.0187274	20.611	1	S	FFSYPEEEKAQKVSRSLTEGEMKKGLGSLSH	X;X;X;X;X;X;X;X;X;X;X;X;X;X;X;Phospho (STY);X;X;X;X;X;X;X;X;X;X;X;X;X;X;X	XXXXXXXXXXXXXXXPPPPPPPPXXXXXXXX	S(0.997)LT(0.003)EGEMK	1	2	-0.61958			16259;16260	16259	39838	56954	52676	32535	40119	33432
sp|O94885|SASH1_HUMAN	137	sp|O94885|SASH1_HUMAN	sp|O94885|SASH1_HUMAN	>sp|O94885|SASH1_HUMAN SAM and SH3 domain-containing protein 1 OS=Homo sapiens OX=9606 GN=SASH1 PE=1 SV=3	0.909513	0.000468813	86.059	1	S	STPEVERKNPLHKSNSEDSSVGKGDWKKKNK	X;X;X;X;X;X;X;X;X;X;X;X;X;X;X;Phospho (STY);X;X;X;X;X;X;X;X;X;X;X;X;X;X;X	XXXXXXXXXXXXXPPPPPPPPPPXXXXXXXX	S(0.004)NS(0.91)EDS(0.082)S(0.004)VGK	3	2	-0.70558			16312;16313	16312	46622	47566	30587	33434	24632	19399
sp|O94885|SASH1_HUMAN	407	sp|O94885|SASH1_HUMAN	sp|O94885|SASH1_HUMAN	>sp|O94885|SASH1_HUMAN SAM and SH3 domain-containing protein 1 OS=Homo sapiens OX=9606 GN=SASH1 PE=1 SV=3	0.929335	1.08e-05	87.035	1	S	EMKKGLGSLSHGRTCSFGGFDLTNRSLHVGS	X;X;X;X;X;X;X;X;X;X;X;X;X;X;X;Phospho (STY);X;X;X;X;X;X;X;X;X;X;X;X;X;X;X	XXXXXXXXXXXXXPPPPPPPPPPPPXXXXXX	T(0.011)CS(0.929)FGGFDLT(0.06)NR	3	2	-0.22109			18089	18089	16891	19092	15102	11482	12835	10284
sp|O94886|CSCL1_HUMAN	739	sp|O94886|CSCL1_HUMAN	sp|O94886|CSCL1_HUMAN	>sp|O94886|CSCL1_HUMAN CSC1-like protein 1 OS=Homo sapiens OX=9606 GN=TMEM63A PE=1 SV=3	0.958341	9.49e-05	46.238	1	S	SPLNYKTEEPASDKGSEAEAHMPPPFTPYVP	X;X;X;X;X;X;X;X;X;X;X;X;X;X;X;Phospho (STY);X;X;X;X;X;X;X;X;X;X;X;X;X;X;X	XXXXXXPPPPPPPPPPPPPPPPPPPPPPPPP	T(0.002)EEPAS(0.038)DKGS(0.958)EAEAHMPPPFT(0.001)PYVPR	10	4	0.18394			18222	18222	13581	23654	18401	11373	11069	10232
sp|O94888|UBXN7_HUMAN	278	sp|O94888|UBXN7_HUMAN	sp|O94888|UBXN7_HUMAN	>sp|O94888|UBXN7_HUMAN UBX domain-containing protein 7 OS=Homo sapiens OX=9606 GN=UBXN7 PE=1 SV=2	0.706228	0.00332669	35.841	2	S	QLDGLSSSPPKKCARSESLIDASEDSQLEAA	X;X;X;X;X;X;X;X;X;X;X;X;X;X;X;Phospho (STY);X;X;X;X;X;X;X;X;X;Phospho (STY);X;X;X;X;X	XXXXXXXXXXXXXXXPPPPPPPPPPPPPPPP	S(0.706)ES(0.282)LIDAS(0.39)EDS(0.622)QLEAAIR	1	2	3.0764			15229	15229	8881.9	9415.8	6998.1	5701.8	5445.3	4250.7
sp|O94888|UBXN7_HUMAN	280	sp|O94888|UBXN7_HUMAN	sp|O94888|UBXN7_HUMAN	>sp|O94888|UBXN7_HUMAN UBX domain-containing protein 7 OS=Homo sapiens OX=9606 GN=UBXN7 PE=1 SV=2	0.919616	7.03e-73	206.58	1;2	S	DGLSSSPPKKCARSESLIDASEDSQLEAAIR	X;X;X;X;X;X;X;X;X;X;X;X;X;X;X;Phospho (STY);X;X;X;X;X;X;X;Phospho (STY);X;X;X;X;X;X;X	XXXXXXXXXXXXXPPPPPPPPPPPPPPPPPP	S(0.08)ES(0.92)LIDASEDSQLEAAIR	3	3	0.81819			15224;15225;15226;15227;15228;15230	15224	44509	62760	50140	37978	35183	30149
sp|O94888|UBXN7_HUMAN	288	sp|O94888|UBXN7_HUMAN	sp|O94888|UBXN7_HUMAN	>sp|O94888|UBXN7_HUMAN UBX domain-containing protein 7 OS=Homo sapiens OX=9606 GN=UBXN7 PE=1 SV=2	0.99972	1.25e-15	106.13	2	S	KKCARSESLIDASEDSQLEAAIRASLQETHF	X;X;X;X;X;Phospho (STY);X;Phospho (STY);X;X;X;X;X;X;X;Phospho (STY);X;X;X;X;X;X;X;X;X;X;X;X;X;X;X	XXXXXPPPPPPPPPPPPPPPPPPXXXXXXXX	S(0.117)ES(0.883)LIDASEDS(1)QLEAAIR	11	3	1.3912			15227;15228;15229;15230	15228	28405	33527	26149	21538	18166	16215
sp|O94921|CDK14_HUMAN	134	sp|O94921|CDK14_HUMAN	sp|O94921|CDK14_HUMAN	>sp|O94921|CDK14_HUMAN Cyclin-dependent kinase 14 OS=Homo sapiens OX=9606 GN=CDK14 PE=1 SV=3	0.997683	0.00614113	30.047	1	S	SSPSSPTSPKFGKADSYEKLEKLGEGSYATV	X;X;X;X;X;X;X;X;X;X;X;X;X;X;X;Phospho (STY);X;X;X;X;X;X;X;X;X;X;X;X;X;X;X	XXXXXXXXXXXXXPPPPPPPPPXXXXXXXXX	ADS(0.998)Y(0.002)EKLEK	3	3	0.8421			481;482	481	52182	63751	53860	44172	40179	31510
sp|O94923|GLCE_HUMAN	73	sp|O94923|GLCE_HUMAN	sp|O94923|GLCE_HUMAN	>sp|O94923|GLCE_HUMAN D-glucuronyl C5-epimerase OS=Homo sapiens OX=9606 GN=GLCE PE=1 SV=3	1	6.73e-07	76.651	1	S	ASESNNYMNHVAKQQSEEAFPQEQQKAPPVV	X;X;X;X;X;X;X;X;X;X;X;X;X;X;X;Phospho (STY);X;X;X;X;X;X;X;X;X;X;X;X;X;X;X	XXXXXXXXXXXXXPPPPPPPPPPPPPXXXXX	QQS(1)EEAFPQEQQK	3	3	0.84525			12758;12759;12760	12760	46443	80174	66178	36161	29202	26536
sp|O94929|ABLM3_HUMAN	372	sp|O94929|ABLM3_HUMAN	sp|O94929|ABLM3_HUMAN	>sp|O94929|ABLM3_HUMAN Actin-binding LIM protein 3 OS=Homo sapiens OX=9606 GN=ABLIM3 PE=1 SV=3	0.999834	1.14e-06	78.15	2	S	SQDIYENLDLRQRRASSPGYIDSPTYSRQGM	X;X;X;X;X;X;X;X;X;X;X;X;X;X;X;Phospho (STY);Phospho (STY);X;X;X;X;X;X;X;X;X;X;X;X;X;X	XXXXXXXXXXXXXPPPPPPPPPPPPPPPXXX	RAS(1)S(1)PGYIDSPTYSR	3	3	-0.49023			13085	13085	15055	19106	16303	11333	10064	10340
sp|O94929|ABLM3_HUMAN	373	sp|O94929|ABLM3_HUMAN	sp|O94929|ABLM3_HUMAN	>sp|O94929|ABLM3_HUMAN Actin-binding LIM protein 3 OS=Homo sapiens OX=9606 GN=ABLIM3 PE=1 SV=3	0.999687	3.35e-08	77.653	1;2	S	QDIYENLDLRQRRASSPGYIDSPTYSRQGMS	X;X;X;X;X;X;X;X;X;X;X;X;X;X;Phospho (STY);Phospho (STY);X;X;X;X;X;X;X;X;X;X;X;X;X;X;X	XXXXXXXXXXXXPPPPPPPPPPPPPPPXXXX	RAS(1)S(1)PGYIDSPTYSR	4	3	-0.49023			1963;13085	13085	26726	35339	28886	20288	18025	16746
sp|O94929|ABLM3_HUMAN	503	sp|O94929|ABLM3_HUMAN	sp|O94929|ABLM3_HUMAN	>sp|O94929|ABLM3_HUMAN Actin-binding LIM protein 3 OS=Homo sapiens OX=9606 GN=ABLIM3 PE=1 SV=3	1	1.75e-12	124.41	1;2	S	WTYHGSPKVPRARRFSSGGEEDDFDRSMHKL	X;X;X;X;X;X;X;X;X;X;X;X;X;X;X;Phospho (STY);Phospho (STY);X;X;X;X;X;X;X;X;X;X;X;X;X;X	XXXXXXXXXXXXXPPPPPPPPPPPPPXXXXX	RFS(1)S(1)GGEEDDFDR	3	3	0.2306			13360;13361;13362;13363;13364;13365;13366;13367;13368;13369	13369	176680	207140	158750	141410	115750	105660
sp|O94929|ABLM3_HUMAN	504	sp|O94929|ABLM3_HUMAN	sp|O94929|ABLM3_HUMAN	>sp|O94929|ABLM3_HUMAN Actin-binding LIM protein 3 OS=Homo sapiens OX=9606 GN=ABLIM3 PE=1 SV=3	1	1.75e-12	124.41	2	S	TYHGSPKVPRARRFSSGGEEDDFDRSMHKLQ	X;X;X;X;X;X;X;X;X;X;X;X;X;X;Phospho (STY);Phospho (STY);X;X;X;X;X;X;X;X;X;X;X;X;X;X;X	XXXXXXXXXXXXPPPPPPPPPPPPPXXXXXX	RFS(1)S(1)GGEEDDFDR	4	3	0.2306			13365;13366;13367;13368;13369	13369	83097	105890	86059	71825	66926	60429
sp|O94929|ABLM3_HUMAN	277	sp|O94929|ABLM3_HUMAN	sp|O94929|ABLM3_HUMAN	>sp|O94929|ABLM3_HUMAN Actin-binding LIM protein 3 OS=Homo sapiens OX=9606 GN=ABLIM3 PE=1 SV=3	0.552672	1.66e-07	65.099	3	S	KQAARAEKKLKHRRTSETSISPPGSSIGSPN	X;X;X;X;X;X;X;X;X;X;X;X;X;X;X;Phospho (STY);X;Phospho (STY);Phospho (STY);X;X;X;X;X;X;X;X;X;X;X;X	XXXXXXXXXXXXXPPPPPPPPPPPPPPPPPP	RT(0.506)S(0.553)ET(0.835)S(0.678)IS(0.426)PPGS(0.001)S(0.001)IGSPNR	3	3	-1.147			14549	14549	12436	17242	13999	9003.8	8115.1	6850.6
sp|O94929|ABLM3_HUMAN	280	sp|O94929|ABLM3_HUMAN	sp|O94929|ABLM3_HUMAN	>sp|O94929|ABLM3_HUMAN Actin-binding LIM protein 3 OS=Homo sapiens OX=9606 GN=ABLIM3 PE=1 SV=3	0.678044	0.00144923	35.43	3	S	ARAEKKLKHRRTSETSISPPGSSIGSPNRVI	X;X;X;X;X;X;X;X;X;X;X;X;Phospho (STY);X;Phospho (STY);Phospho (STY);X;X;X;X;X;X;X;X;X;X;X;X;X;X;X	XXXXXXXXXXPPPPPPPPPPPPPPPPPPPXX	RT(0.506)S(0.553)ET(0.835)S(0.678)IS(0.426)PPGS(0.001)S(0.001)IGSPNR	6	3	-1.147			14549	14549	12436	17242	13999	9003.8	8115.1	6850.6
sp|O94929|ABLM3_HUMAN	282	sp|O94929|ABLM3_HUMAN	sp|O94929|ABLM3_HUMAN	>sp|O94929|ABLM3_HUMAN Actin-binding LIM protein 3 OS=Homo sapiens OX=9606 GN=ABLIM3 PE=1 SV=3	0.77343	2.7e-05	46.157	2	S	AEKKLKHRRTSETSISPPGSSIGSPNRVICA	X;X;X;X;X;X;X;X;X;Phospho (STY);X;X;X;X;X;Phospho (STY);X;X;X;X;X;X;X;X;X;X;X;X;X;X;X	XXXXXXXXPPPPPPPPPPPPPPPPPPPXXXX	RT(0.424)S(0.424)ET(0.219)S(0.158)IS(0.773)PPGSSIGSPNR	8	3	-0.49986			14547	14547	11756	12576	9888.6	8684.2	7152.4	5718.8
sp|O94956|SO2B1_HUMAN	320	sp|O94956|SO2B1_HUMAN	sp|O94956|SO2B1_HUMAN	>sp|O94956|SO2B1_HUMAN Solute carrier organic anion transporter family member 2B1 OS=Homo sapiens OX=9606 GN=SLCO2B1 PE=1 SV=2	0.999366	6.43e-06	101.11	1	S	KRELQFRRKVLAVTDSPARKGKDSPSKQSPG	X;X;X;X;X;X;X;X;X;X;X;X;X;X;X;Phospho (STY);X;X;X;X;X;X;X;X;X;X;X;X;X;X;X	XXXXXXXXXPPPPPPPPPPXXXXXXXXXXXX	VLAVT(0.001)DS(0.999)PAR	7	2	-0.041151			19908;19909	19908	38536	40762	47885	27645	24012	27258
sp|O94979|SC31A_HUMAN	799	sp|O94979|SC31A_HUMAN	sp|O94979|SC31A_HUMAN	>sp|O94979|SC31A_HUMAN Protein transport protein Sec31A OS=Homo sapiens OX=9606 GN=SEC31A PE=1 SV=3	1	9.07e-08	74.653	1	S	DRLCRAQGEPVAGHESPKIPYEKQQLPKGRP	X;X;X;X;X;X;X;X;X;X;X;X;X;X;X;Phospho (STY);X;X;X;X;X;X;X;X;X;X;X;X;X;X;X	XXXXXPPPPPPPPPPPPPPPPPPXXXXXXXX	AQGEPVAGHES(1)PK	11	3	0.36906			1545;1546;1547;1548;1549;1550;1551;1552;1553	1547	114500	192720	195940	77800	80917	79247
sp|O94989|ARHGF_HUMAN	107	sp|O94989|ARHGF_HUMAN	sp|O94989|ARHGF_HUMAN	>sp|O94989|ARHGF_HUMAN Rho guanine nucleotide exchange factor 15 OS=Homo sapiens OX=9606 GN=ARHGEF15 PE=1 SV=4	1	0.00392095	40.037	2	S	DSPSSTPTPSPVSRRSASPEPAPRSPVPPPK	X;X;X;X;X;X;X;X;X;X;X;X;X;X;X;Phospho (STY);X;Phospho (STY);X;X;X;X;X;X;X;X;X;X;X;X;X	XXXXXXXXXXXXXXPPPPPPPPPPXXXXXXX	RS(1)AS(1)PEPAPR	2	2	0.14609			14267	14267	4330.4	2995.2	3091.1	3704	2343.8	2274.9
sp|O94989|ARHGF_HUMAN	109	sp|O94989|ARHGF_HUMAN	sp|O94989|ARHGF_HUMAN	>sp|O94989|ARHGF_HUMAN Rho guanine nucleotide exchange factor 15 OS=Homo sapiens OX=9606 GN=ARHGEF15 PE=1 SV=4	1	0.00392095	43.247	1;2	S	PSSTPTPSPVSRRSASPEPAPRSPVPPPKPS	X;X;X;X;X;X;X;X;X;X;X;X;X;Phospho (STY);X;Phospho (STY);X;X;X;X;X;X;X;X;X;X;X;X;X;X;X	XXXXXXXXXXXXPPPPPPPPPPXXXXXXXXX	RS(1)AS(1)PEPAPR	4	2	0.14609			14267;14838;14839;14840	14267	50193	50949	43470	36921	27649	23969
sp|O95049|ZO3_HUMAN	105	sp|O95049|ZO3_HUMAN	sp|O95049|ZO3_HUMAN	>sp|O95049|ZO3_HUMAN Tight junction protein ZO-3 OS=Homo sapiens OX=9606 GN=TJP3 PE=1 SV=3	0.450633	1.22e-06	49.264		S	KRPRRIHLPATKASPSSPGRQDSDEDDGPQR	X;X;X;X;X;X;X;X;X;X;X;X;X;X;X;Phospho (STY);X;X;X;X;X;X;Phospho (STY);X;X;X;X;X;X;X;X	XXXXXXXXXXXXPPPPPPPPPPPPPPPPPPP	AS(0.131)PS(0.451)S(0.42)PGRQDS(0.998)DEDDGPQRVEEVDQGR	4	4	0.080178				1886	0	0	0	0	0	0
sp|O95049|ZO3_HUMAN	106	sp|O95049|ZO3_HUMAN	sp|O95049|ZO3_HUMAN	>sp|O95049|ZO3_HUMAN Tight junction protein ZO-3 OS=Homo sapiens OX=9606 GN=TJP3 PE=1 SV=3	0.623665	4.51e-10	71.4	2	S	RPRRIHLPATKASPSSPGRQDSDEDDGPQRV	X;X;X;X;X;X;X;X;X;X;X;X;X;X;X;Phospho (STY);X;X;X;X;X;Phospho (STY);X;X;X;X;X;X;X;X;X	XXXXXXXXXXXPPPPPPPPPPPPPPPPPPPP	AS(0.202)PS(0.202)S(0.624)PGRQDS(0.972)DEDDGPQRVEEVDQGR	5	4	-1.8583			1888	1888	4304.5	7362.7	5960.5	3350.7	2511.7	2185.2
sp|O95049|ZO3_HUMAN	112	sp|O95049|ZO3_HUMAN	sp|O95049|ZO3_HUMAN	>sp|O95049|ZO3_HUMAN Tight junction protein ZO-3 OS=Homo sapiens OX=9606 GN=TJP3 PE=1 SV=3	0.999991	1.54e-50	153.97	1;2	S	LPATKASPSSPGRQDSDEDDGPQRVEEVDQG	X;X;X;X;X;X;X;X;Phospho (STY);Phospho (STY);X;X;X;X;X;Phospho (STY);X;X;X;X;X;X;X;X;X;X;X;X;X;X;X	XXXXXPPPPPPPPPPPPPPPPPPPPPPPPPP	ASPSSPGRQDS(1)DEDDGPQR	11	3	-0.34526			1877;1878;1879;1880;1881;1882;1883;1884;1885;1886;1887;1888;1889	1877	60925	86916	99497	41971	30375	30204
sp|O95049|ZO3_HUMAN	368	sp|O95049|ZO3_HUMAN	sp|O95049|ZO3_HUMAN	>sp|O95049|ZO3_HUMAN Tight junction protein ZO-3 OS=Homo sapiens OX=9606 GN=TJP3 PE=1 SV=3	0.953539	2.07e-07	75.7	2	S	SELPRESSYDIYRVPSSQSMEDRGYSPDTRV	X;X;X;X;X;X;X;X;X;X;X;X;X;X;X;Phospho (STY);X;X;Phospho (STY);X;X;X;X;X;X;Phospho (STY);X;X;X;X;X	XXXXXPPPPPPPPPPPPPPPPPPXXXXXXXX	ESSYDIYRVPS(0.954)S(0.292)QS(0.755)MEDR	11	3	-0.8327			4924;4925	4925	25627	47270	39428	19922	18032	17237
sp|O95049|ZO3_HUMAN	371	sp|O95049|ZO3_HUMAN	sp|O95049|ZO3_HUMAN	>sp|O95049|ZO3_HUMAN Tight junction protein ZO-3 OS=Homo sapiens OX=9606 GN=TJP3 PE=1 SV=3	0.997576	2.07e-07	75.7	1;2	S	PRESSYDIYRVPSSQSMEDRGYSPDTRVVRF	X;X;X;X;X;X;X;X;X;X;X;X;Phospho (STY);X;X;Phospho (STY);X;X;X;X;X;X;Phospho (STY);X;X;X;X;X;X;X;X	XXPPPPPPPPPPPPPPPPPPXXXXXXXXXXX	VPSS(0.002)QS(0.998)MEDR	6	2	0.29832			4924;4925;20071;20072	20072	60777	87549	76886	42635	40910	38072
sp|O95049|ZO3_HUMAN	378	sp|O95049|ZO3_HUMAN	sp|O95049|ZO3_HUMAN	>sp|O95049|ZO3_HUMAN Tight junction protein ZO-3 OS=Homo sapiens OX=9606 GN=TJP3 PE=1 SV=3	0.999635	1.24e-07	55.96	1	S	IYRVPSSQSMEDRGYSPDTRVVRFLKGKSIG	X;X;X;X;X;Phospho (STY);X;X;Phospho (STY);X;X;X;X;X;X;Phospho (STY);X;X;X;X;X;X;X;X;X;X;X;X;X;X;X	XXXXXXXXXXXXXPPPPPPPXXXXXXXXXXX	GYS(1)PDTR	3	2	-0.33425			7456;7457;7458	7458	30912	39156	65138	19682	17998	16327
sp|O95049|ZO3_HUMAN	319	sp|O95049|ZO3_HUMAN	sp|O95049|ZO3_HUMAN	>sp|O95049|ZO3_HUMAN Tight junction protein ZO-3 OS=Homo sapiens OX=9606 GN=TJP3 PE=1 SV=3	0.999911	2.12e-17	112.36	2	S	APPSHIPPPPRHAQRSPEASQTDSPVESPRL	X;X;X;X;X;X;X;X;X;X;X;X;X;X;X;Phospho (STY);X;X;X;X;X;X;X;Phospho (STY);X;X;X;X;X;X;X	XXXXXXXXXXXPPPPPPPPPPPPPPPPPPPX	HAQRS(1)PEAS(0.013)QT(0.253)DS(0.733)PVES(0.001)PR	5	3	-0.5305			7495;7496;7497	7495	7341.1	11608	15142	5782.3	4165.9	3753.5
sp|O95049|ZO3_HUMAN	327	sp|O95049|ZO3_HUMAN	sp|O95049|ZO3_HUMAN	>sp|O95049|ZO3_HUMAN Tight junction protein ZO-3 OS=Homo sapiens OX=9606 GN=TJP3 PE=1 SV=3	0.733429	2.12e-17	112.36	2	S	PPRHAQRSPEASQTDSPVESPRLRRESSVDS	X;X;X;X;X;X;X;Phospho (STY);X;X;X;X;X;X;X;Phospho (STY);X;X;X;X;X;X;X;X;X;X;X;X;X;X;X	XXXPPPPPPPPPPPPPPPPPPPXXXXXXXXX	HAQRS(1)PEAS(0.013)QT(0.253)DS(0.733)PVES(0.001)PR	13	3	-0.5305			7495;7496;7497	7495	7341.1	11608	15142	5782.3	4165.9	3753.5
sp|O95049|ZO3_HUMAN	203	sp|O95049|ZO3_HUMAN	sp|O95049|ZO3_HUMAN	>sp|O95049|ZO3_HUMAN Tight junction protein ZO-3 OS=Homo sapiens OX=9606 GN=TJP3 PE=1 SV=3	1	0.000781133	47.46	1	S	VQMKPVKSVLVKRRDSEEFGVKLGSQIFIKH	X;X;X;X;X;X;X;X;X;X;X;X;X;X;X;Phospho (STY);X;X;X;X;X;X;X;X;X;X;X;X;X;X;X	XXXXXXXXXXXXPPPPPPPPPPXXXXXXXXX	RRDS(1)EEFGVK	4	3	-0.15963			14141;14142	14142	31063	47406	51169	26260	24262	21276
sp|O95049|ZO3_HUMAN	854	sp|O95049|ZO3_HUMAN	sp|O95049|ZO3_HUMAN	>sp|O95049|ZO3_HUMAN Tight junction protein ZO-3 OS=Homo sapiens OX=9606 GN=TJP3 PE=1 SV=3	0.5	2.88e-06	69.554	1	S	APALARSSEPVQADESQSPRDRGRISAHQGA	X;X;X;X;X;X;X;X;X;X;X;X;X;X;X;Phospho (STY);X;X;X;X;X;X;X;X;X;X;X;X;X;X;X	XXXXXXPPPPPPPPPPPPPPPPXXXXXXXXX	SSEPVQADES(0.5)QS(0.5)PRDR	10	3	0.96634			17130	17130	2530.5	5257.1	5086.4	1946.7	1735.5	1841.1
sp|O95049|ZO3_HUMAN	856	sp|O95049|ZO3_HUMAN	sp|O95049|ZO3_HUMAN	>sp|O95049|ZO3_HUMAN Tight junction protein ZO-3 OS=Homo sapiens OX=9606 GN=TJP3 PE=1 SV=3	0.999823	1.66e-19	126.93	1	S	ALARSSEPVQADESQSPRDRGRISAHQGAQV	X;X;X;X;X;X;X;X;X;X;X;X;X;X;X;Phospho (STY);X;X;X;X;X;X;X;X;X;X;X;X;X;X;X	XXXXPPPPPPPPPPPPPPPPXXXXXXXXXXX	SSEPVQADESQS(1)PR	12	2	-1.0701			17126;17127;17128;17129;17130	17126	27869	51298	47149	19595	17184	17089
sp|O95049|ZO3_HUMAN	346	sp|O95049|ZO3_HUMAN	sp|O95049|ZO3_HUMAN	>sp|O95049|ZO3_HUMAN Tight junction protein ZO-3 OS=Homo sapiens OX=9606 GN=TJP3 PE=1 SV=3	0.903749	0.000221246	85.495	1	S	SPRLRRESSVDSRTISEPDEQRSELPRESSY	X;X;X;X;X;X;X;X;X;X;X;X;X;X;X;Phospho (STY);X;X;X;X;X;X;X;X;X;X;X;X;X;X;X	XXXXXXXXXXXXXPPPPPPPPPXXXXXXXXX	T(0.096)IS(0.904)EPDEQR	3	2	0.42029			18439;18440	18440	20567	29732	42201	14761	12357	9946.5
sp|O95049|ZO3_HUMAN	905	sp|O95049|ZO3_HUMAN	sp|O95049|ZO3_HUMAN	>sp|O95049|ZO3_HUMAN Tight junction protein ZO-3 OS=Homo sapiens OX=9606 GN=TJP3 PE=1 SV=3	0.999893	5.43e-05	40.161	2	S	REALKKKFMRVHDAESSDEDGYDWGPATDL_	X;X;X;X;X;X;X;X;X;X;X;X;X;X;X;Phospho (STY);Phospho (STY);X;X;X;X;X;X;X;X;X;X;X;X;X;X	XXXXXXXXXXPPPPPPPPPPPPPPPPPPPPX	VHDAES(1)S(1)DEDGYDWGPATDL	6	3	-0.0093611			19726;19727;19728	19728	17449	23152	20113	14724	14393	12379
sp|O95049|ZO3_HUMAN	906	sp|O95049|ZO3_HUMAN	sp|O95049|ZO3_HUMAN	>sp|O95049|ZO3_HUMAN Tight junction protein ZO-3 OS=Homo sapiens OX=9606 GN=TJP3 PE=1 SV=3	0.999867	5.43e-05	40.161	2	S	EALKKKFMRVHDAESSDEDGYDWGPATDL__	X;X;X;X;X;X;X;X;X;X;X;X;X;X;Phospho (STY);Phospho (STY);X;X;X;X;X;X;X;X;X;X;X;X;X;X;X	XXXXXXXXXPPPPPPPPPPPPPPPPPPPPXX	VHDAES(1)S(1)DEDGYDWGPATDL	7	3	0.50265			19726;19727;19728	19727	17449	23152	20113	14724	14393	12379
sp|O95071|UBR5_HUMAN	636	sp|O95071|UBR5_HUMAN	sp|O95071|UBR5_HUMAN	>sp|O95071|UBR5_HUMAN E3 ubiquitin-protein ligase UBR5 OS=Homo sapiens OX=9606 GN=UBR5 PE=1 SV=2	0.956535	0.00297375	39.808	1	S	SSIASSASMPYKRRRSTPAPKEEEKVNEEQW	X;X;X;X;X;X;X;X;X;X;X;X;X;X;X;Phospho (STY);X;X;X;X;X;X;X;X;X;X;X;X;X;X;X	XXXXXXXXXXXXXXXPPPPPPPPPPXXXXXX	S(0.957)T(0.043)PAPKEEEK	1	3	0.8227			17651	17651	19775	38470	33481	14145	14847	14502
sp|O95104|SCAF4_HUMAN	154	sp|O95104|SCAF4_HUMAN	sp|O95104|SCAF4_HUMAN	>sp|O95104|SCAF4_HUMAN SR-related and CTD-associated factor 4 OS=Homo sapiens OX=9606 GN=SCAF4 PE=1 SV=3	0.668674	3.72e-06	43.631	1	S	SNAAPVAENVTNNEGSPPPPVKVSSEPPTQA	X;X;X;X;X;X;X;X;X;X;X;X;X;X;X;Phospho (STY);X;X;X;X;X;X;X;X;X;X;X;X;X;X;X	PPPPPPPPPPPPPPPPPPPPPPXXXXXXXXX	IEIIQPLLDMAAGT(0.042)S(0.042)NAAPVAENVT(0.246)NNEGS(0.669)PPPPVK	30	5	-2.5355			7902	7902	7092.2	12040	8158.3	5409.4	6056.8	4789.4
sp|O95136|S1PR2_HUMAN	331	sp|O95136|S1PR2_HUMAN	sp|O95136|S1PR2_HUMAN	>sp|O95136|S1PR2_HUMAN Sphingosine 1-phosphate receptor 2 OS=Homo sapiens OX=9606 GN=S1PR2 PE=1 SV=2	0.534797	0.00145145	39.103	2	S	RRGGTPGHHLLPLRSSSSLERGMHMPTSPTF	X;X;X;X;X;X;X;X;X;X;X;X;X;X;X;Phospho (STY);Phospho (STY);X;X;X;X;X;X;X;X;X;X;X;X;X;X	XXPPPPPPPPPPPPPPPPPPPXXXXXXXXXX	GGTPGHHLLPLRS(0.465)S(0.535)S(0.535)S(0.465)LER	14	3	0.90135			6132	6132	12507	13187	12150	9880.6	7589.9	7122.2
sp|O95136|S1PR2_HUMAN	332	sp|O95136|S1PR2_HUMAN	sp|O95136|S1PR2_HUMAN	>sp|O95136|S1PR2_HUMAN Sphingosine 1-phosphate receptor 2 OS=Homo sapiens OX=9606 GN=S1PR2 PE=1 SV=2	0.789069	0.00145145	39.103	2	S	RGGTPGHHLLPLRSSSSLERGMHMPTSPTFL	X;X;X;X;X;X;X;X;X;X;X;X;X;X;Phospho (STY);Phospho (STY);Phospho (STY);X;X;X;X;X;X;X;X;X;X;X;X;X;X	XPPPPPPPPPPPPPPPPPPPXXXXXXXXXXX	S(0.074)S(0.238)S(0.789)S(0.899)LER	3	2	-0.073467			6132;17467	17467	24538	27102	24155	17140	14071	13524
sp|O95136|S1PR2_HUMAN	333	sp|O95136|S1PR2_HUMAN	sp|O95136|S1PR2_HUMAN	>sp|O95136|S1PR2_HUMAN Sphingosine 1-phosphate receptor 2 OS=Homo sapiens OX=9606 GN=S1PR2 PE=1 SV=2	0.908284	3.36e-12	13.906	1;2	S	GGTPGHHLLPLRSSSSLERGMHMPTSPTFLE	X;X;X;X;X;X;X;X;X;X;X;X;X;X;Phospho (STY);Phospho (STY);X;X;X;X;X;X;X;X;X;X;X;X;X;X;X	XXXXXXXXXXXXPPPPPPPXXXXXXXXXXXX	SS(0.001)S(0.09)S(0.908)LER	4	2	1.4966			17467;17468;17469	17469	26737	26997	22264	19504	15560	15750
sp|O95171|SCEL_HUMAN	195	sp|O95171|SCEL_HUMAN	sp|O95171|SCEL_HUMAN	>sp|O95171|SCEL_HUMAN Sciellin OS=Homo sapiens OX=9606 GN=SCEL PE=1 SV=2	0.484489	0.000848232	31.916		S	RRREPGVHPPIPPKPSSPVSSPNQLRQDNRQ	X;X;X;X;X;X;X;X;X;X;X;X;X;X;X;Phospho (STY);X;X;X;X;X;X;X;X;X;X;X;X;X;X;X	XXXPPPPPPPPPPPPPPPPPPPPPPPXXXXX	EPGVHPPIPPKPS(0.484)S(0.484)PVS(0.022)S(0.009)PNQLR	13	4	-0.31955				4566	0	0	0	0	0	0
sp|O95171|SCEL_HUMAN	196	sp|O95171|SCEL_HUMAN	sp|O95171|SCEL_HUMAN	>sp|O95171|SCEL_HUMAN Sciellin OS=Homo sapiens OX=9606 GN=SCEL PE=1 SV=2	0.718754	1.64e-08	64.601	1	S	RREPGVHPPIPPKPSSPVSSPNQLRQDNRQI	X;X;X;X;X;X;X;X;X;X;X;X;X;X;X;Phospho (STY);X;X;X;X;X;X;X;X;X;X;X;X;X;X;X	XXPPPPPPPPPPPPPPPPPPPPPPPXXXXXX	EPGVHPPIPPKPS(0.204)S(0.719)PVS(0.059)S(0.018)PNQLR	14	4	-0.14686			4565;4567	4565	21976	30832	23273	15207	14403	13020
sp|O95171|SCEL_HUMAN	389	sp|O95171|SCEL_HUMAN	sp|O95171|SCEL_HUMAN	>sp|O95171|SCEL_HUMAN Sciellin OS=Homo sapiens OX=9606 GN=SCEL PE=1 SV=2	1	0.000155724	74.393	1	S	IKVDPETNKNITRGQSLDNLIKVTPEVKRSN	X;X;X;X;X;X;X;X;X;X;X;X;X;X;X;Phospho (STY);X;X;X;X;X;X;X;X;X;X;X;X;X;X;X	XXXXXXXXXXXXXPPPPPPPPPXXXXXXXXX	GQS(1)LDNLIK	3	2	1.0158			6814;6815;6816;6817;6818	6818	241090	570350	136240	155440	171840	128860
sp|O95171|SCEL_HUMAN	68	sp|O95171|SCEL_HUMAN	sp|O95171|SCEL_HUMAN	>sp|O95171|SCEL_HUMAN Sciellin OS=Homo sapiens OX=9606 GN=SCEL PE=1 SV=2	1	0.000168278	99.881	1	S	EKDENYGRVVLNRHNSHDALDRKVNERDVPK	X;X;X;X;X;X;X;X;X;X;X;X;X;X;X;Phospho (STY);X;X;X;X;X;X;X;X;X;X;X;X;X;X;X	XXXXXXXXXXXXXPPPPPPPPPXXXXXXXXX	HNS(1)HDALDR	3	3	0.36128			7576;7577;7578	7578	24689	43149	10230	14586	10356	11456
sp|O95171|SCEL_HUMAN	347	sp|O95171|SCEL_HUMAN	sp|O95171|SCEL_HUMAN	>sp|O95171|SCEL_HUMAN Sciellin OS=Homo sapiens OX=9606 GN=SCEL PE=1 SV=2	1	5.99e-23	143.4	1	S	SVAKVNARMNKTSRRSEDLDNATEVNPKGHE	X;X;X;X;X;X;X;X;X;X;X;X;X;X;X;Phospho (STY);X;X;X;X;X;X;X;X;X;X;X;X;X;X;X	XXXXXXXXXXXXXXPPPPPPPPPPPPPPXXX	RS(1)EDLDNATEVNPK	2	3	1.1065			14293;14294;14295	14293	56777	95972	56201	39587	38832	45269
sp|O95171|SCEL_HUMAN	475	sp|O95171|SCEL_HUMAN	sp|O95171|SCEL_HUMAN	>sp|O95171|SCEL_HUMAN Sciellin OS=Homo sapiens OX=9606 GN=SCEL PE=1 SV=2	1	6.59e-20	130.23	1	S	ANKSSEQGLDEHINVSPKAVKNTDGKQDLDK	X;X;X;X;X;X;X;X;X;X;X;X;X;X;X;Phospho (STY);X;X;X;X;X;X;X;X;X;X;X;X;X;X;X	XXXPPPPPPPPPPPPPPPXXXXXXXXXXXXX	SSEQGLDEHINVS(1)PK	13	4	-0.72916			17131;17132;17133;17134;17135;17136	17136	84192	116790	59281	61569	56174	49618
sp|O95171|SCEL_HUMAN	344	sp|O95171|SCEL_HUMAN	sp|O95171|SCEL_HUMAN	>sp|O95171|SCEL_HUMAN Sciellin OS=Homo sapiens OX=9606 GN=SCEL PE=1 SV=2	0.472902	3.76e-06	64.213		S	NLESVAKVNARMNKTSRRSEDLDNATEVNPK	X;X;X;X;X;X;X;X;X;X;X;X;X;X;X;X;X;X;Phospho (STY);X;X;X;X;X;X;X;X;X;X;X;X	XXXXXXXXXXXXXXXXXXXXXXXXXXXXXXX	T(0.473)S(0.473)RRS(0.054)EDLDNAT(0.001)EVNPK	2	3	-0.55911				19008	0	0	0	0	0	0
sp|O95171|SCEL_HUMAN	91	sp|O95171|SCEL_HUMAN	sp|O95171|SCEL_HUMAN	>sp|O95171|SCEL_HUMAN Sciellin OS=Homo sapiens OX=9606 GN=SCEL PE=1 SV=2	0.997381	1.48e-14	144.11	1	S	VNERDVPKATISRYSSDDTLDRISDRNDAAK	X;X;X;X;X;X;X;X;X;X;X;X;X;X;X;Phospho (STY);X;X;X;X;X;X;X;X;X;X;X;X;X;X;X	XXXXXXXXXXXXXPPPPPPPPPXXXXXXXXX	YS(0.003)S(0.997)DDTLDR	3	2	0.034143			20766;20767	20767	44131	68275	31121	24400	22630	19843
sp|O95208|EPN2_HUMAN	173	sp|O95208|EPN2_HUMAN	sp|O95208|EPN2_HUMAN	>sp|O95208|EPN2_HUMAN Epsin-2 OS=Homo sapiens OX=9606 GN=EPN2 PE=1 SV=3	0.973907	6.83e-36	160.47	1	S	ATGMGSNQITFGRGSSQPNLSTSHSEQEYGK	X;X;X;X;X;X;X;X;X;X;X;X;X;X;X;Phospho (STY);X;X;X;X;X;X;X;X;X;X;X;X;X;X;X	XXXXXXXXXXXXXPPPPPPPPPPPPPPPPPP	GS(0.022)S(0.974)QPNLS(0.002)T(0.003)SHSEQEYGK	3	3	-0.47669			7223;7224;7225	7223	32470	29070	32476	24260	17907	14501
sp|O95210|STBD1_HUMAN	211	sp|O95210|STBD1_HUMAN	sp|O95210|STBD1_HUMAN	>sp|O95210|STBD1_HUMAN Starch-binding domain-containing protein 1 OS=Homo sapiens OX=9606 GN=STBD1 PE=1 SV=1	0.921186	4.85e-09	88.745	1	S	DRVDHEEWEMVPRHSSWGDVGVGGSLKAPVL	X;X;X;X;X;X;X;X;X;X;X;X;X;X;X;Phospho (STY);X;X;X;X;X;X;X;X;X;X;X;X;X;X;X	XXXXXXXXXXXXXPPPPPPPPPPPPPPXXXX	HS(0.079)S(0.921)WGDVGVGGSLK	3	3	0.095457			7641;7642;7643	7643	44435	73573	114710	36910	35410	34094
sp|O95218|ZRAB2_HUMAN	120	sp|O95218|ZRAB2_HUMAN	sp|O95218|ZRAB2_HUMAN	>sp|O95218|ZRAB2_HUMAN Zinc finger Ran-binding domain-containing protein 2 OS=Homo sapiens OX=9606 GN=ZRANB2 PE=1 SV=2	1	7.87e-69	208.32	1	S	GFNERENVEYIEREESDGEYDEFGRKKKKYR	X;X;X;X;X;X;X;X;X;X;X;X;X;X;X;Phospho (STY);X;X;X;X;X;X;X;X;X;X;X;X;X;X;X	XXXXXPPPPPPPPPPPPPPPPPPPPPXXXXX	ENVEYIEREES(1)DGEYDEFGR	11	3	-0.68541			4527;4528;4529;4530;4531;4532;4533;4534	4527	74161	131450	82639	55507	53039	45202
sp|O95218|ZRAB2_HUMAN	153	sp|O95218|ZRAB2_HUMAN	sp|O95218|ZRAB2_HUMAN	>sp|O95218|ZRAB2_HUMAN Zinc finger Ran-binding domain-containing protein 2 OS=Homo sapiens OX=9606 GN=ZRANB2 PE=1 SV=2	1	7.58e-69	200.56	1	S	AVGPASILKEVEDKESEGEEEDEDEDLSKYK	X;X;X;X;X;X;X;X;X;X;X;X;X;X;X;Phospho (STY);X;X;X;X;X;X;X;X;X;X;X;X;X;X;X	XXXXXXXXXPPPPPPPPPPPPPPPPPPPPXX	EVEDKES(1)EGEEEDEDEDLSK	7	3	-0.51787			5132;5133;5134;5135;5136;5137	5137	131250	280180	166010	87501	79997	74973
sp|O95218|ZRAB2_HUMAN	188	sp|O95218|ZRAB2_HUMAN	sp|O95218|ZRAB2_HUMAN	>sp|O95218|ZRAB2_HUMAN Zinc finger Ran-binding domain-containing protein 2 OS=Homo sapiens OX=9606 GN=ZRANB2 PE=1 SV=2	0.999999	7.68e-51	173.21	1	S	EDEDDADLSKYNLDASEEEDSNKKKSNRRSR	X;X;X;X;X;X;X;X;X;X;X;X;X;X;X;Phospho (STY);X;X;X;X;X;X;X;X;X;X;X;X;X;X;X	PPPPPPPPPPPPPPPPPPPPPPPPPXXXXXX	YNLDAS(1)EEEDSNK	6	2	0.3594			10145;10146;20605;20606;20643;20644;20645;20646;20647;20648;20649;20650;20651	20647	220840	385520	221990	151180	130000	109330
sp|O95292|VAPB_HUMAN	156	sp|O95292|VAPB_HUMAN	sp|O95292|VAPB_HUMAN	>sp|O95292|VAPB_HUMAN Vesicle-associated membrane protein-associated protein B/C OS=Homo sapiens OX=9606 GN=VAPB PE=1 SV=3	0.994175	0.000815663	39.753	1	S	ISTTASKTETPIVSKSLSSSLDDTEVKKVME	X;X;X;X;X;X;X;X;X;X;X;X;X;X;X;Phospho (STY);X;X;X;X;X;X;X;X;X;X;X;X;X;X;X	XXXXXXXXXXXXXXXPPPPPPPPPPPPPXXX	S(0.994)LS(0.004)S(0.001)SLDDTEVKK	1	3	0.1377			16240	16240	17553	41328	26955	13529	13620	12991
sp|O95292|VAPB_HUMAN	158	sp|O95292|VAPB_HUMAN	sp|O95292|VAPB_HUMAN	>sp|O95292|VAPB_HUMAN Vesicle-associated membrane protein-associated protein B/C OS=Homo sapiens OX=9606 GN=VAPB PE=1 SV=3	0.814485	4.31e-14	124.62	1	S	TTASKTETPIVSKSLSSSLDDTEVKKVMEEC	X;X;X;X;X;X;X;X;X;X;X;X;X;X;X;Phospho (STY);X;X;X;X;X;X;X;X;X;X;X;X;X;X;X	XXXXXXXXXXXXXPPPPPPPPPPPPPXXXXX	SLS(0.814)S(0.149)S(0.037)LDDTEVKK	3	3	0.5821			16239	16239	18462	68450	45558	14160	20373	21105
sp|O95292|VAPB_HUMAN	159	sp|O95292|VAPB_HUMAN	sp|O95292|VAPB_HUMAN	>sp|O95292|VAPB_HUMAN Vesicle-associated membrane protein-associated protein B/C OS=Homo sapiens OX=9606 GN=VAPB PE=1 SV=3	0.45489	0.000411926	51.276		S	TASKTETPIVSKSLSSSLDDTEVKKVMEECK	X;X;X;X;X;X;X;X;X;X;X;X;X;X;X;Phospho (STY);X;X;X;X;X;X;X;X;X;X;X;X;X;X;X	XXXXXXXXXXXXPPPPPPPPPPPPXXXXXXX	S(0.016)LS(0.074)S(0.455)S(0.455)LDDTEVK	4	3	0.71884				16235	0	0	0	0	0	0
sp|O95292|VAPB_HUMAN	160	sp|O95292|VAPB_HUMAN	sp|O95292|VAPB_HUMAN	>sp|O95292|VAPB_HUMAN Vesicle-associated membrane protein-associated protein B/C OS=Homo sapiens OX=9606 GN=VAPB PE=1 SV=3	0.964643	5.76e-12	103.89	1	S	ASKTETPIVSKSLSSSLDDTEVKKVMEECKR	X;X;X;X;X;X;X;X;X;X;X;X;X;X;X;Phospho (STY);X;X;X;X;X;X;X;X;X;X;X;X;X;X;X	XXXXXXXXXXXPPPPPPPPPPPPPXXXXXXX	SLS(0.005)S(0.03)S(0.965)LDDTEVK	5	2	1.7207			16237;16238	16237	42302	78114	61637	38584	40907	33762
sp|O95297|MPZL1_HUMAN	221	sp|O95297|MPZL1_HUMAN	sp|O95297|MPZL1_HUMAN	>sp|O95297|MPZL1_HUMAN Myelin protein zero-like protein 1 OS=Homo sapiens OX=9606 GN=MPZL1 PE=1 SV=1	0.993291	2.53e-07	96.508	1	S	SESLSPVKQAPRKSPSDTEGLVKSLPSGSHQ	X;X;X;X;X;X;X;X;X;X;X;X;X;X;X;Phospho (STY);X;X;X;X;X;X;X;X;X;X;X;X;X;X;X	XXXXXXXXXXXXPPPPPPPPPPPXXXXXXXX	KS(0.001)PS(0.993)DT(0.006)EGLVK	4	3	0.59875			9747;9748;9749	9749	48070	96017	98471	36069	37500	29507
sp|O95359|TACC2_HUMAN	2512	sp|O95359|TACC2_HUMAN	sp|O95359|TACC2_HUMAN	>sp|O95359|TACC2_HUMAN Transforming acidic coiled-coil-containing protein 2 OS=Homo sapiens OX=9606 GN=TACC2 PE=1 SV=3	0.975043	1.09e-06	85.396	1	S	QPSDLSTFVNETKFSSPTEELDYRNSYEIEY	X;X;X;X;X;X;X;X;X;X;X;X;X;X;X;Phospho (STY);X;X;X;X;X;X;X;X;X;X;X;X;X;X;X	XXXXXXXXXXXXXPPPPPPPPPPPXXXXXXX	FS(0.004)S(0.975)PT(0.021)EELDYR	3	2	-1.492			5523	5523	11633	24188	14893	9922.1	9710.1	9318.2
sp|O95359|TACC2_HUMAN	2317	sp|O95359|TACC2_HUMAN	sp|O95359|TACC2_HUMAN	>sp|O95359|TACC2_HUMAN Transforming acidic coiled-coil-containing protein 2 OS=Homo sapiens OX=9606 GN=TACC2 PE=1 SV=3	0.946257	1.79e-11	83.403	2	S	PKMKKTPEKLDNTPASPPRSPAEPNDIPIAK	X;X;X;X;X;X;X;X;X;X;X;X;X;X;X;Phospho (STY);X;X;X;Phospho (STY);X;X;X;X;X;X;X;X;X;X;X	XXXXXXXXXPPPPPPPPPPPPPPPPPPPPPP	LDNT(0.055)PAS(0.946)PPRS(0.998)PAEPNDIPIAK	7	4	0.64837			10178;10179;10180;10181	10180	59562	73812	58383	46525	38946	38327
sp|O95359|TACC2_HUMAN	2321	sp|O95359|TACC2_HUMAN	sp|O95359|TACC2_HUMAN	>sp|O95359|TACC2_HUMAN Transforming acidic coiled-coil-containing protein 2 OS=Homo sapiens OX=9606 GN=TACC2 PE=1 SV=3	0.998322	1.79e-11	83.403	2	S	KTPEKLDNTPASPPRSPAEPNDIPIAKGTYT	X;X;X;X;X;X;X;X;X;X;X;Phospho (STY);X;X;X;Phospho (STY);X;X;X;X;X;X;X;X;X;X;X;X;X;X;X	XXXXXPPPPPPPPPPPPPPPPPPPPPPXXXX	LDNT(0.055)PAS(0.946)PPRS(0.998)PAEPNDIPIAK	11	4	0.64837			10178;10179;10180;10181	10180	59562	73812	58383	46525	38946	38327
sp|O95359|TACC2_HUMAN	2359	sp|O95359|TACC2_HUMAN	sp|O95359|TACC2_HUMAN	>sp|O95359|TACC2_HUMAN Transforming acidic coiled-coil-containing protein 2 OS=Homo sapiens OX=9606 GN=TACC2 PE=1 SV=3	0.99951	3.08e-10	75.373	1	S	DPNFNPFSSTSKMQESPKLPQQSYNFDPDTC	X;X;X;X;X;X;X;X;X;X;X;X;X;X;X;Phospho (STY);X;X;X;X;X;X;X;X;X;X;X;X;X;X;X	XXXXXXXXXXXXPPPPPPPPPPPPPPPPPPP	MQES(1)PKLPQQSYNFDPDTCDESVDPFK	4	4	0.14456			11576;11577	11576	14550	23694	19363	12512	12162	11497
sp|O95359|TACC2_HUMAN	1946	sp|O95359|TACC2_HUMAN	sp|O95359|TACC2_HUMAN	>sp|O95359|TACC2_HUMAN Transforming acidic coiled-coil-containing protein 2 OS=Homo sapiens OX=9606 GN=TACC2 PE=1 SV=3	0.484096	2.3e-20	126.22		S	ASTPSCPDPAKDLSRSSDSEEAFETPESTTP	X;X;X;X;X;X;X;X;X;X;X;X;X;X;X;Phospho (STY);X;X;X;X;X;X;X;X;X;X;X;X;X;X;X	XXXXXXXXXXXXXXXPPPPPPPPPPPPPPPP	S(0.484)S(0.484)DS(0.032)EEAFETPESTTPVK	1	3	1.1803				17111	0	0	0	0	0	0
sp|O95359|TACC2_HUMAN	1947	sp|O95359|TACC2_HUMAN	sp|O95359|TACC2_HUMAN	>sp|O95359|TACC2_HUMAN Transforming acidic coiled-coil-containing protein 2 OS=Homo sapiens OX=9606 GN=TACC2 PE=1 SV=3	0.484096	2.3e-20	126.22		S	STPSCPDPAKDLSRSSDSEEAFETPESTTPV	X;X;X;X;X;X;X;X;X;X;X;X;X;X;X;X;X;X;X;X;X;X;X;X;X;X;X;X;X;X;X	XXXXXXXXXXXXXXXXXXXXXXXXXXXXXXX	S(0.484)S(0.484)DS(0.032)EEAFETPESTTPVK	2	3	1.1803				17111	0	0	0	0	0	0
sp|O95359|TACC2_HUMAN	2390	sp|O95359|TACC2_HUMAN	sp|O95359|TACC2_HUMAN	>sp|O95359|TACC2_HUMAN Transforming acidic coiled-coil-containing protein 2 OS=Homo sapiens OX=9606 GN=TACC2 PE=1 SV=3	0.903898	0.00937949	9.0748	1	S	DESVDPFKTSSKTPSSPSKSPASFEIPASAM	X;X;X;X;X;X;X;X;X;X;X;X;X;X;X;Phospho (STY);X;X;X;X;X;X;X;X;X;X;X;X;X;X;X	XXXXXXXXXXXXPPPPPPPXXXXXXXXXXXX	T(0.017)PS(0.078)S(0.904)PS(0.001)K	4	2	-0.018922			18783;18784	18783	31297	42894	34708	21665	20706	18104
sp|O95359|TACC2_HUMAN	2226	sp|O95359|TACC2_HUMAN	sp|O95359|TACC2_HUMAN	>sp|O95359|TACC2_HUMAN Transforming acidic coiled-coil-containing protein 2 OS=Homo sapiens OX=9606 GN=TACC2 PE=1 SV=3	1	0.00298548	59.265	1	S	EGVVPPASGGGRVQNSPPVGRKTLPLTTAPE	X;X;X;X;X;X;X;X;X;X;X;X;X;X;X;Phospho (STY);X;X;X;X;X;X;X;X;X;X;X;X;X;X;X	XXXXXXXXXXXXPPPPPPPPPXXXXXXXXXX	VQNS(1)PPVGR	4	2	1.3161			20125;20126	20126	21637	27232	22777	16205	13529	11883
sp|O95361|TRI16_HUMAN	60	sp|O95361|TRI16_HUMAN	sp|O95361|TRI16_HUMAN	>sp|O95361|TRI16_HUMAN Tripartite motif-containing protein 16 OS=Homo sapiens OX=9606 GN=TRIM16 PE=1 SV=3	0.958414	1.21e-31	137.04	1	S	VGSSEKLGRETEEQDSDSAEQGDPAGEGKEV	X;X;X;X;X;X;X;X;X;X;X;X;X;X;X;Phospho (STY);X;X;X;X;X;X;X;X;X;X;X;X;X;X;X	XXXXXXXXXPPPPPPPPPPPPPPPPPPPPXX	ETEEQDS(0.958)DS(0.042)AEQGDPAGEGK	7	3	0.41083			4955;4956;4957	4957	45957	38953	41520	35779	23828	22910
sp|O95361|TRI16_HUMAN	62	sp|O95361|TRI16_HUMAN	sp|O95361|TRI16_HUMAN	>sp|O95361|TRI16_HUMAN Tripartite motif-containing protein 16 OS=Homo sapiens OX=9606 GN=TRIM16 PE=1 SV=3	0.720493	1.86e-32	142.28	1	S	SSEKLGRETEEQDSDSAEQGDPAGEGKEVLC	X;X;X;X;X;X;X;X;X;X;X;X;X;X;X;Phospho (STY);X;X;X;X;X;X;X;X;X;X;X;X;X;X;X	XXXXXXXPPPPPPPPPPPPPPPPPPPPXXXX	ETEEQDS(0.279)DS(0.72)AEQGDPAGEGK	9	3	0.36607			4954	4954	15795	11194	11741	12007	7284.5	7565.1
sp|O95365|ZBT7A_HUMAN	337	sp|O95365|ZBT7A_HUMAN	sp|O95365|ZBT7A_HUMAN	>sp|O95365|ZBT7A_HUMAN Zinc finger and BTB domain-containing protein 7A OS=Homo sapiens OX=9606 GN=ZBTB7A PE=1 SV=1	0.999954	9.28e-25	126.83	1	S	QMMSSVGRAGAAAGDSDEESRADDKGVMDYY	X;X;X;X;X;X;X;X;X;X;X;X;X;X;X;Phospho (STY);X;X;X;X;X;X;X;X;X;X;X;X;X;X;X	XXXXXXXXPPPPPPPPPPPPPPPPPPPPPPP	AGAAAGDS(1)DEESRADDK	8	3	0.1898			779;780;781;782;783	782	62718	80328	79330	46607	41927	37688
sp|O95365|ZBT7A_HUMAN	525	sp|O95365|ZBT7A_HUMAN	sp|O95365|ZBT7A_HUMAN	>sp|O95365|ZBT7A_HUMAN Zinc finger and BTB domain-containing protein 7A OS=Homo sapiens OX=9606 GN=ZBTB7A PE=1 SV=1	0.555364	1.27e-06	52.647	1	S	PSPGATATPGAPAQPSSPDARRNGQEKHFKD	X;X;X;X;X;X;X;X;X;X;X;X;X;X;X;Phospho (STY);X;X;X;X;X;X;X;X;X;X;X;X;X;X;X	PPPPPPPPPPPPPPPPPPPPPXXXXXXXXXX	GGAPDPSPGATATPGAPAQPS(0.555)S(0.444)PDAR	21	3	1.0587			5997	5997	14300	17118	15547	14995	9110.8	14323
sp|O95365|ZBT7A_HUMAN	526	sp|O95365|ZBT7A_HUMAN	sp|O95365|ZBT7A_HUMAN	>sp|O95365|ZBT7A_HUMAN Zinc finger and BTB domain-containing protein 7A OS=Homo sapiens OX=9606 GN=ZBTB7A PE=1 SV=1	0.95627	2.35e-18	96.779	1	S	SPGATATPGAPAQPSSPDARRNGQEKHFKDE	X;X;X;X;X;X;X;X;X;X;X;X;X;X;X;Phospho (STY);X;X;X;X;X;X;X;X;X;X;X;X;X;X;X	PPPPPPPPPPPPPPPPPPPPXXXXXXXXXXX	GGAPDPSPGATATPGAPAQPS(0.044)S(0.956)PDAR	22	3	0.8171			5998;5999	5998	17353	22709	21409	16184	10911	12548
sp|O95382|M3K6_HUMAN	984	sp|O95382|M3K6_HUMAN	sp|O95382|M3K6_HUMAN	>sp|O95382|M3K6_HUMAN Mitogen-activated protein kinase kinase kinase 6 OS=Homo sapiens OX=9606 GN=MAP3K6 PE=1 SV=3	0.998137	8.23e-15	87.784	1	S	SQLRVPEEPAAEEPASPEESSGLSLLHQESK	X;X;X;X;X;X;X;X;X;X;X;X;X;X;X;Phospho (STY);X;X;X;X;X;X;X;X;X;X;X;X;X;X;X	XXXXPPPPPPPPPPPPPPPPPPPPPPPPPPP	VPEEPAAEEPAS(0.998)PEES(0.001)SGLSLLHQESK	12	4	-0.76447			20024	20024	11155	15844	11624	7771.5	7831.4	7450.2
sp|O95391|SLU7_HUMAN	215	sp|O95391|SLU7_HUMAN	sp|O95391|SLU7_HUMAN	>sp|O95391|SLU7_HUMAN Pre-mRNA-splicing factor SLU7 OS=Homo sapiens OX=9606 GN=SLU7 PE=1 SV=2	1	0.00114788	73.33	1	S	LQEELASGKLVEQANSPKHQWGEEEPNSQME	X;X;X;X;X;X;X;X;X;X;X;X;X;X;X;Phospho (STY);X;X;X;X;X;X;X;X;X;X;X;X;X;X;X	XXXXXXXXXPPPPPPPPPXXXXXXXXXXXXX	LVEQANS(1)PK	7	2	1.1062			11276;11277;11278;11279;11280;11281	11281	82267	119300	101550	63738	52295	49731
sp|O95400|CD2B2_HUMAN	49	sp|O95400|CD2B2_HUMAN	sp|O95400|CD2B2_HUMAN	>sp|O95400|CD2B2_HUMAN CD2 antigen cytoplasmic tail-binding protein 2 OS=Homo sapiens OX=9606 GN=CD2BP2 PE=1 SV=1	0.99986	2.86e-31	160.77	1	S	SGGPGSRFKGKHSLDSDEEEDDDDGGSSKYD	X;X;X;X;X;X;X;X;X;X;X;X;X;X;X;Phospho (STY);X;X;X;X;X;X;X;X;X;X;X;X;X;X;X	XXXXXXXXXXXPPPPPPPPPPPPPPPPPPXX	HSLDS(1)DEEEDDDDGGSSK	5	3	0.27105			7620;7621;7622;7623	7620	41502	63434	49437	30485	26154	26629
sp|O95400|CD2B2_HUMAN	195	sp|O95400|CD2B2_HUMAN	sp|O95400|CD2B2_HUMAN	>sp|O95400|CD2B2_HUMAN CD2 antigen cytoplasmic tail-binding protein 2 OS=Homo sapiens OX=9606 GN=CD2BP2 PE=1 SV=1	0.988218	0.00054059	54.632	1	S	ARGGGKGRKGPGQPSSPQRLDRLSGLADQMV	X;X;X;X;X;X;X;X;X;X;X;X;X;X;X;Phospho (STY);X;X;X;X;X;X;X;X;X;X;X;X;X;X;X	XXXXXXXXPPPPPPPPPPPXXXXXXXXXXXX	KGPGQPS(0.012)S(0.988)PQR	8	2	0.1831			9022;9023;9024;9025;9026	9026	29563	58818	55390	22153	22066	19213
sp|O95425|SVIL_HUMAN	673	sp|O95425|SVIL_HUMAN	sp|O95425|SVIL_HUMAN	>sp|O95425|SVIL_HUMAN Supervillin OS=Homo sapiens OX=9606 GN=SVIL PE=1 SV=2	0.486267	0.00179814	29.001		S	QPITSAERKESDRCTSHSETPTVDDEEKVDE	X;X;X;X;X;X;X;X;X;X;X;X;X;X;X;X;X;X;X;X;X;X;X;X;X;X;X;X;X;X;X	XXXXXXXXXXXXXXXXXXXXXXXXXXXXXXX	CT(0.486)S(0.486)HS(0.021)ET(0.006)PTVDDEEKVDER	3	4	-1.859				2400	0	0	0	0	0	0
sp|O95425|SVIL_HUMAN	237	sp|O95425|SVIL_HUMAN	sp|O95425|SVIL_HUMAN	>sp|O95425|SVIL_HUMAN Supervillin OS=Homo sapiens OX=9606 GN=SVIL PE=1 SV=2	0.556908	6.7e-06	76.222	2	S	PAAESSSTFSFSGRDSSFTEVPRSPKHAHSS	X;X;X;X;X;X;X;X;X;X;X;X;X;X;X;Phospho (STY);X;X;X;X;X;X;X;Phospho (STY);X;X;X;X;X;X;X	XXXXXXXXXXXXXXPPPPPPPPPPPPXXXXX	DS(0.557)S(0.438)FT(0.005)EVPRS(1)PK	2	3	0.26419			3179	3179	9558.7	34369	23816	7613.7	10964	10415
sp|O95425|SVIL_HUMAN	238	sp|O95425|SVIL_HUMAN	sp|O95425|SVIL_HUMAN	>sp|O95425|SVIL_HUMAN Supervillin OS=Homo sapiens OX=9606 GN=SVIL PE=1 SV=2	0.487246	0.000630814	44.551		S	AAESSSTFSFSGRDSSFTEVPRSPKHAHSSS	X;X;X;X;X;X;X;X;X;X;X;X;X;X;X;Phospho (STY);X;X;X;X;X;X;Phospho (STY);X;X;X;X;X;X;X;X	XXXXXXXXXXXXXPPPPPPPPPPPPXXXXXX	DS(0.394)S(0.487)FT(0.158)EVPRS(0.961)PK	3	3	1.0329				3178	0	0	0	0	0	0
sp|O95425|SVIL_HUMAN	245	sp|O95425|SVIL_HUMAN	sp|O95425|SVIL_HUMAN	>sp|O95425|SVIL_HUMAN Supervillin OS=Homo sapiens OX=9606 GN=SVIL PE=1 SV=2	0.999967	2.43e-17	137.46	1;2	S	FSFSGRDSSFTEVPRSPKHAHSSSLQQAASR	X;X;X;X;X;X;X;Phospho (STY);Phospho (STY);X;X;X;X;X;X;Phospho (STY);X;X;X;X;X;X;X;X;X;X;X;X;X;X;X	XXXXXXPPPPPPPPPPPPXXXXXXXXXXXXX	DSSFTEVPRS(1)PK	10	2	-0.66128			3170;3171;3172;3173;3174;3175;3176;3177;3178;3179	3171	112420	238400	180980	88127	93883	86397
sp|O95425|SVIL_HUMAN	707	sp|O95425|SVIL_HUMAN	sp|O95425|SVIL_HUMAN	>sp|O95425|SVIL_HUMAN Supervillin OS=Homo sapiens OX=9606 GN=SVIL PE=1 SV=2	1	6.25e-05	63.873	1	S	LSVAAKRLLFREMEKSFDEQNVPKRRSRNTA	X;X;X;X;X;X;X;X;X;X;X;X;X;X;X;Phospho (STY);X;X;X;X;X;X;X;X;X;X;X;X;X;X;X	XXXXXXXXXXXPPPPPPPPPPPPPXXXXXXX	EMEKS(1)FDEQNVPK	5	4	-0.91681			4423;4424;4425	4425	55619	115360	65396	35943	32964	31767
sp|O95425|SVIL_HUMAN	914	sp|O95425|SVIL_HUMAN	sp|O95425|SVIL_HUMAN	>sp|O95425|SVIL_HUMAN Supervillin OS=Homo sapiens OX=9606 GN=SVIL PE=1 SV=2	0.941217	2.4e-12	120.39	1	S	PLDHNASATDYKFSSSIENSDSPVRSILKSQ	X;X;X;X;X;X;X;X;X;X;X;X;X;X;X;Phospho (STY);X;X;X;X;X;X;X;X;X;X;X;X;X;X;X	XXXXXXXXXXXXPPPPPPPPPPPPPXXXXXX	FS(0.002)S(0.055)S(0.941)IENS(0.002)DSPVR	4	2	0.43553			5524;5525	5524	29340	67854	49517	25996	23954	21251
sp|O95425|SVIL_HUMAN	221	sp|O95425|SVIL_HUMAN	sp|O95425|SVIL_HUMAN	>sp|O95425|SVIL_HUMAN Supervillin OS=Homo sapiens OX=9606 GN=SVIL PE=1 SV=2	1	4.48e-24	128.05	1	S	RRGQELSATRQAHDLSPAAESSSTFSFSGRD	X;X;X;X;X;X;X;X;X;X;X;X;X;X;X;Phospho (STY);X;X;X;X;X;X;X;X;X;X;X;X;X;X;X	XXXXXXXXXXPPPPPPPPPPPPPPPPPPPPX	QAHDLS(1)PAAESSSTFSFSGR	6	3	-0.81243			12134	12134	19094	28123	23592	16081	16896	14064
sp|O95425|SVIL_HUMAN	547	sp|O95425|SVIL_HUMAN	sp|O95425|SVIL_HUMAN	>sp|O95425|SVIL_HUMAN Supervillin OS=Homo sapiens OX=9606 GN=SVIL PE=1 SV=2	0.944576	5.43e-12	108.32	1	S	GHNREASKKRKVRTRSLSDFTGPPQLQALKY	X;X;X;X;X;X;X;X;X;X;X;X;X;X;X;Phospho (STY);X;X;X;X;X;X;X;X;X;X;X;X;X;X;X	XXXXXXXXXXXXXXXPPPPPPPPPPPPPPPX	S(0.945)LS(0.055)DFTGPPQLQALK	1	3	0.77085			16150;16151	16151	9189	15023	10558	7229.2	7732.5	7635.6
sp|O95425|SVIL_HUMAN	261	sp|O95425|SVIL_HUMAN	sp|O95425|SVIL_HUMAN	>sp|O95425|SVIL_HUMAN Supervillin OS=Homo sapiens OX=9606 GN=SVIL PE=1 SV=2	0.688262	1.87e-06	86.031	2	S	PKHAHSSSLQQAASRSPSFGDPQLSPEARPS	X;X;X;X;X;X;X;X;X;X;X;X;X;X;X;Phospho (STY);X;X;X;X;X;X;X;X;Phospho (STY);X;X;X;X;X;X	XXXXXXXXXXXXXXXPPPPPPPPPPPPPPXX	S(0.688)PS(0.312)FGDPQLS(1)PEAR	1	3	0.28025			16521	16521	5954.8	10571	8296.9	4796.5	4754.6	4542.8
sp|O95425|SVIL_HUMAN	263	sp|O95425|SVIL_HUMAN	sp|O95425|SVIL_HUMAN	>sp|O95425|SVIL_HUMAN Supervillin OS=Homo sapiens OX=9606 GN=SVIL PE=1 SV=2	0.657576	9.02e-09	90.274	2	S	HAHSSSLQQAASRSPSFGDPQLSPEARPSTG	X;X;X;X;X;X;X;X;X;X;X;X;X;X;X;Phospho (STY);X;X;X;X;X;X;Phospho (STY);X;X;X;X;X;X;X;X	XXXXXXXXXXXXXPPPPPPPPPPPPPPXXXX	S(0.342)PS(0.658)FGDPQLS(1)PEAR	3	3	1.0614			16522;16523;16524	16522	26238	46277	41277	23292	24315	24089
sp|O95425|SVIL_HUMAN	270	sp|O95425|SVIL_HUMAN	sp|O95425|SVIL_HUMAN	>sp|O95425|SVIL_HUMAN Supervillin OS=Homo sapiens OX=9606 GN=SVIL PE=1 SV=2	1	9.02e-09	90.274	1;2	S	QQAASRSPSFGDPQLSPEARPSTGKPKHEWF	X;X;X;X;X;X;Phospho (STY);X;Phospho (STY);X;X;X;X;X;X;Phospho (STY);X;X;X;X;X;X;X;X;X;X;X;X;X;X;X	XXXXXXPPPPPPPPPPPPPPXXXXXXXXXXX	S(0.371)PS(0.629)FGDPQLS(1)PEAR	10	2	1.4479			16517;16518;16519;16520;16521;16522;16523;16524	16523	77486	124950	105940	64971	63704	59920
sp|O95425|SVIL_HUMAN	968	sp|O95425|SVIL_HUMAN	sp|O95425|SVIL_HUMAN	>sp|O95425|SVIL_HUMAN Supervillin OS=Homo sapiens OX=9606 GN=SVIL PE=1 SV=2	1	4.16e-35	144.65	1	S	KRALTGRDSGMEKYGSFEEAEASYPILNRAR	X;X;X;X;X;X;X;X;X;X;X;X;X;X;X;Phospho (STY);X;X;X;X;X;X;X;X;X;X;X;X;X;X;X	XXXXXXXXXXXXXPPPPPPPPPPPPPPPPXX	YGS(1)FEEAEASYPILNR	3	3	-1.8174			20568;20569;20570	20568	31565	59037	43823	23562	22566	23306
sp|O95436|NPT2B_HUMAN	683	sp|O95436|NPT2B_HUMAN	sp|O95436|NPT2B_HUMAN	>sp|O95436|NPT2B_HUMAN Sodium-dependent phosphate transport protein 2B OS=Homo sapiens OX=9606 GN=SLC34A2 PE=1 SV=3	0.593877	0.000113064	47.281	1	S	ITISREAQGEVPASDSKTECTAL________	X;Phospho (STY);X;X;X;X;X;X;X;X;X;X;X;X;X;Phospho (STY);X;X;X;X;X;X;X;X;X;X;X;X;X;X;X	XXXXXPPPPPPPPPPPPPPPPPPXXXXXXXX	EAQGEVPAS(0.195)DS(0.594)KT(0.195)ECT(0.016)AL	11	3	-2.2559			3499;3500	3500	24093	45329	51249	21950	21570	18378
sp|O95436|NPT2B_HUMAN	55	sp|O95436|NPT2B_HUMAN	sp|O95436|NPT2B_HUMAN	>sp|O95436|NPT2B_HUMAN Sodium-dependent phosphate transport protein 2B OS=Homo sapiens OX=9606 GN=SLC34A2 PE=1 SV=3	0.693633	6.77e-23	95.64	2	S	NTEAPVTKIELLPSYSTATLIDEPTEVDDPW	X;X;X;X;X;X;X;X;X;X;X;X;X;X;X;Phospho (STY);X;X;Phospho (STY);X;X;X;X;X;X;X;X;X;X;X;X	XXXXXXXXPPPPPPPPPPPPPPPPPPPPPPP	IELLPS(0.136)YS(0.694)T(0.231)AT(0.938)LIDEPT(0.002)EVDDPWNLPTLQDSGIK	8	4	-1.6958			7908;7909	7908	7275.3	25003	24444	5051.9	7234.3	5332.1
sp|O95453|PARN_HUMAN	619	sp|O95453|PARN_HUMAN	sp|O95453|PARN_HUMAN	>sp|O95453|PARN_HUMAN Poly(A)-specific ribonuclease PARN OS=Homo sapiens OX=9606 GN=PARN PE=1 SV=1	0.998904	0.00058038	56.689	1	S	GRKKAKKLKRMKKELSPAGSISKNSPATLFE	X;X;X;X;X;X;X;X;X;X;X;X;X;X;X;Phospho (STY);X;X;X;X;X;X;X;X;X;X;X;X;X;X;X	XXXXXXXXXXXXXPPPPPPPPPPXXXXXXXX	ELS(0.999)PAGS(0.001)ISK	3	3	-1.3459			4379;4380	4379	9732.6	18105	14183	6680.1	8167.7	7607.6
sp|O95453|PARN_HUMAN	570	sp|O95453|PARN_HUMAN	sp|O95453|PARN_HUMAN	>sp|O95453|PARN_HUMAN Poly(A)-specific ribonuclease PARN OS=Homo sapiens OX=9606 GN=PARN PE=1 SV=1	0.537858	3.66e-20	83.432	2	S	NNSFTAPSTVGKRNLSPSQEEAGLEDGVSGE	X;X;X;X;X;X;X;X;X;X;X;X;X;X;X;Phospho (STY);X;X;X;X;X;X;X;X;X;X;X;X;Phospho (STY);X;X	XXXXXXXXXXXXXPPPPPPPPPPPPPPPPPP	NLS(0.538)PS(0.462)QEEAGLEDGVS(0.383)GEIS(0.308)DT(0.308)ELEQT(0.001)DSCAEPLSEGR	3	4	2.1072			11849	11849	3402.8	3943.9	3484.5	3378.4	2602.8	2442.2
sp|O95453|PARN_HUMAN	583	sp|O95453|PARN_HUMAN	sp|O95453|PARN_HUMAN	>sp|O95453|PARN_HUMAN Poly(A)-specific ribonuclease PARN OS=Homo sapiens OX=9606 GN=PARN PE=1 SV=1	0.383492	3.66e-20	83.432		S	NLSPSQEEAGLEDGVSGEISDTELEQTDSCA	X;X;Phospho (STY);X;X;X;X;X;X;X;X;X;X;X;X;Phospho (STY);X;X;X;X;X;X;X;X;X;X;X;X;X;X;X	PPPPPPPPPPPPPPPPPPPPPPPPPPPPPPP	NLS(0.538)PS(0.462)QEEAGLEDGVS(0.383)GEIS(0.308)DT(0.308)ELEQT(0.001)DSCAEPLSEGR	16	4	2.1072				11849	0	0	0	0	0	0
sp|O95453|PARN_HUMAN	587	sp|O95453|PARN_HUMAN	sp|O95453|PARN_HUMAN	>sp|O95453|PARN_HUMAN Poly(A)-specific ribonuclease PARN OS=Homo sapiens OX=9606 GN=PARN PE=1 SV=1	0.332599	2.08e-10	61.792		S	SQEEAGLEDGVSGEISDTELEQTDSCAEPLS	X;X;X;X;X;X;X;X;X;X;X;X;X;X;X;X;X;X;X;X;X;X;X;X;X;X;X;X;X;X;X	XXXXXXXXXXXXXXXXXXXXXXXXXXXXXXX	NLSPSQEEAGLEDGVS(0.333)GEIS(0.333)DT(0.333)ELEQT(0.002)DSCAEPLSEGR	20	4	0.52968				11848	0	0	0	0	0	0
sp|O95466|FMNL1_HUMAN	1031	sp|O95466|FMNL1_HUMAN	sp|O95466|FMNL1_HUMAN	>sp|O95466|FMNL1_HUMAN Formin-like protein 1 OS=Homo sapiens OX=9606 GN=FMNL1 PE=1 SV=3	1	1.59e-17	92.747	1	S	AGADTPGKGEPPAPKSPPKARRPQMDLISEL	X;X;X;X;X;X;X;X;X;X;X;X;X;X;X;Phospho (STY);X;X;X;X;X;X;X;X;X;X;X;X;X;X;X	PPPPPPPPPPPPPPPPPPPXXXXXXXXXXXX	GEPPAPKS(1)PPK	8	3	-0.27786			3345;3346;3347;3348;3349;5935	5935	104460	129480	137060	79004	74847	68755
sp|O95466|FMNL1_HUMAN	184	sp|O95466|FMNL1_HUMAN	sp|O95466|FMNL1_HUMAN	>sp|O95466|FMNL1_HUMAN Formin-like protein 1 OS=Homo sapiens OX=9606 GN=FMNL1 PE=1 SV=3	0.999998	3.57e-12	95.557	1	S	DNGASNSEKNKPLEQSVEDLSKGPPSSVPKS	X;X;X;X;X;X;X;X;X;X;X;X;X;X;X;Phospho (STY);X;X;X;X;X;X;X;X;X;X;X;X;X;X;X	XXXXXXXXXPPPPPPPPPPPPPXXXXXXXXX	NKPLEQS(1)VEDLSK	7	3	0.35515			11788;11789;11790	11790	108060	110280	83293	68323	51823	49484
sp|O95466|FMNL1_HUMAN	624	sp|O95466|FMNL1_HUMAN	sp|O95466|FMNL1_HUMAN	>sp|O95466|FMNL1_HUMAN Formin-like protein 1 OS=Homo sapiens OX=9606 GN=FMNL1 PE=1 SV=3	1	1.4e-06	43.852	1	S	PPPPGGPPDALGRRDSELGPGVKAKKPIQTK	X;X;X;X;X;X;X;X;X;X;X;X;X;X;X;Phospho (STY);X;X;X;X;X;X;X;X;X;X;X;X;X;X;X	XXXXXXXXXXXXXPPPPPPPPPPXXXXXXXX	RDS(1)ELGPGVK	3	2	0.29482			13134;13135;13136;13137;13138	13138	100290	103120	100050	63168	56814	47344
sp|O95471|CLD7_HUMAN	206	sp|O95471|CLD7_HUMAN	sp|O95471|CLD7_HUMAN	>sp|O95471|CLD7_HUMAN Claudin-7 OS=Homo sapiens OX=9606 GN=CLDN7 PE=1 SV=4	0.8076	0.0299156	28.241	1	S	SKAGYRVPRSYPKSNSSKEYV__________	X;X;X;X;X;X;X;X;X;X;X;X;X;X;X;Phospho (STY);X;X;X;X;X;X;X;X;X;X;X;X;X;X;X	XXXXXXXXXXXXXPPPPPPPPXXXXXXXXXX	S(0.003)NS(0.808)S(0.181)KEY(0.009)V	3	2	0.88933			16356	16356	25083	32955	40760	15402	15500	16811
sp|O95471|CLD7_HUMAN	207	sp|O95471|CLD7_HUMAN	sp|O95471|CLD7_HUMAN	>sp|O95471|CLD7_HUMAN Claudin-7 OS=Homo sapiens OX=9606 GN=CLDN7 PE=1 SV=4	0.791521	0.0340654	27.975	1	S	KAGYRVPRSYPKSNSSKEYV___________	X;X;X;X;X;X;X;X;X;X;X;X;X;X;X;Phospho (STY);X;X;X;X;X;X;X;X;X;X;X;X;X;X;X	XXXXXXXXXXXXPPPPPPPPXXXXXXXXXXX	S(0.004)NS(0.204)S(0.792)KEY(0.001)V	4	2	0.60065			16357	16357	23858	32821	29012	16563	10804	11541
sp|O95544|NADK_HUMAN	46	sp|O95544|NADK_HUMAN	sp|O95544|NADK_HUMAN	>sp|O95544|NADK_HUMAN NAD kinase OS=Homo sapiens OX=9606 GN=NADK PE=1 SV=1	0.497222	1.12e-06	61.845		S	TWSYNHPIRGRAKSRSLSASPALGSTKEFRR	X;X;X;X;X;X;X;X;X;X;X;X;X;X;X;Phospho (STY);X;X;X;X;X;X;X;X;X;X;X;X;X;X;X	XXXXXXXXXXXXXXXPPPPPPPPPPPPXXXX	S(0.497)LS(0.497)AS(0.006)PALGSTK	1	3	-0.23495				16147	0	0	0	0	0	0
sp|O95544|NADK_HUMAN	48	sp|O95544|NADK_HUMAN	sp|O95544|NADK_HUMAN	>sp|O95544|NADK_HUMAN NAD kinase OS=Homo sapiens OX=9606 GN=NADK PE=1 SV=1	0.846417	1.12e-06	74.075	1	S	SYNHPIRGRAKSRSLSASPALGSTKEFRRTR	X;X;X;X;X;X;X;X;X;X;X;X;X;X;X;Phospho (STY);X;X;X;X;X;X;X;X;X;X;X;X;X;X;X	XXXXXXXXXXXXXPPPPPPPPPPPPXXXXXX	S(0.117)LS(0.846)AS(0.036)PALGSTK	3	3	-1.3364			16146	16146	6953.7	7592.8	8860.4	4268.5	4941	4212
sp|O95562|SFT2B_HUMAN	9	sp|O95562|SFT2B_HUMAN	sp|O95562|SFT2B_HUMAN	>sp|O95562|SFT2B_HUMAN Vesicle transport protein SFT2B OS=Homo sapiens OX=9606 GN=SFT2D2 PE=1 SV=1	0.980492	0.00309323	55.8	1	S	_______MDKLKKVLSGQDTEDRSGLSEVVE	X;X;X;X;X;X;X;X;X;X;X;X;X;X;X;Phospho (STY);X;X;X;X;X;X;X;X;X;X;X;X;X;X;X	XXXXXXXXXXXXXPPPPPPPPPPXXXXXXXX	VLS(0.98)GQDT(0.02)EDR	3	2	0.023518			19945;19946	19945	26309	52180	38993	21204	19864	15762
sp|O95671|ASML_HUMAN	239	sp|O95671|ASML_HUMAN	sp|O95671|ASML_HUMAN	>sp|O95671|ASML_HUMAN Probable bifunctional dTTP/UTP pyrophosphatase/methyltransferase protein OS=Homo sapiens OX=9606 GN=ASMTL PE=1 SV=3	0.999986	1.69e-28	118.09	1	S	VKHDSIPAADTFEDLSDVEGGGSEPTQRDAG	X;X;X;X;X;X;X;X;X;X;X;X;X;X;X;Phospho (STY);X;X;X;X;X;X;X;X;X;X;X;X;X;X;X	XXPPPPPPPPPPPPPPPPPPPPPPPPPPXXX	HDSIPAADTFEDLS(1)DVEGGGSEPTQR	14	3	0.069895			7511;7512;7513	7511	24130	29762	25374	20229	16067	16127
sp|O95674|CDS2_HUMAN	21	sp|O95674|CDS2_HUMAN	sp|O95674|CDS2_HUMAN	>sp|O95674|CDS2_HUMAN Phosphatidate cytidylyltransferase 2 OS=Homo sapiens OX=9606 GN=CDS2 PE=1 SV=1	0.952586	2.95e-17	100.27	1;2	S	QRVAHEPVAPPEDKESESEAKVDGETASDSE	X;X;X;X;X;X;X;X;X;X;X;X;X;X;X;Phospho (STY);X;X;X;X;X;X;X;X;X;Phospho (STY);X;Phospho (STY);X;X;X	XXPPPPPPPPPPPPPPPPPPPPPPPPPPPPP	VAHEPVAPPEDKES(0.953)ES(0.047)EAK	14	4	0.071466			19328;19329;19330;19332;19333	19328	77033	89300	74772	49888	50671	47608
sp|O95674|CDS2_HUMAN	33	sp|O95674|CDS2_HUMAN	sp|O95674|CDS2_HUMAN	>sp|O95674|CDS2_HUMAN Phosphatidate cytidylyltransferase 2 OS=Homo sapiens OX=9606 GN=CDS2 PE=1 SV=1	0.991343	3.55e-16	131.22	1;2	S	DKESESEAKVDGETASDSESRAESAPLPVSA	X;X;X;Phospho (STY);X;X;X;X;X;X;X;X;X;X;X;Phospho (STY);X;X;X;X;X;X;X;X;X;X;X;X;X;X;X	PPPPPPPPPPPPPPPPPPPPPXXXXXXXXXX	VDGET(0.007)AS(0.991)DS(0.002)ESR	7	2	-0.030815			19333;19407;19408;19409;19410;19411;19412;19413;19414;19415;19416	19409	107150	138440	112320	80829	81397	65344
sp|O95684|FR1OP_HUMAN	156	sp|O95684|FR1OP_HUMAN	sp|O95684|FR1OP_HUMAN	>sp|O95684|FR1OP_HUMAN FGFR1 oncogene partner OS=Homo sapiens OX=9606 GN=FGFR1OP PE=1 SV=1	0.990079	2.48e-13	89.984	2	S	GPTTGEGALDLSDVHSPPKSPEGKTSAQTTP	X;X;X;X;X;X;X;X;X;X;X;X;X;X;X;Phospho (STY);X;X;X;Phospho (STY);X;X;X;X;X;X;X;X;X;X;X	PPPPPPPPPPPPPPPPPPPPPPPPXXXXXXX	EKGPTTGEGALDLS(0.011)DVHS(0.99)PPKS(0.999)PEGK	18	5	-0.24801			4195;6755	4195	17445	25575	26100	13358	12014	11614
sp|O95684|FR1OP_HUMAN	160	sp|O95684|FR1OP_HUMAN	sp|O95684|FR1OP_HUMAN	>sp|O95684|FR1OP_HUMAN FGFR1 oncogene partner OS=Homo sapiens OX=9606 GN=FGFR1OP PE=1 SV=1	0.999962	2.48e-13	89.984	2	S	GEGALDLSDVHSPPKSPEGKTSAQTTPSKIP	X;X;X;X;X;X;X;X;X;X;X;Phospho (STY);X;X;X;Phospho (STY);X;X;X;X;X;X;X;X;X;X;X;X;X;X;X	PPPPPPPPPPPPPPPPPPPPXXXXXXXXXXX	GPTTGEGALDLS(0.015)DVHS(0.985)PPKS(1)PEGK	20	4	-0.14341			4195;6755	6755	17445	25575	26100	13358	12014	11614
sp|O95685|PPR3D_HUMAN	74	sp|O95685|PPR3D_HUMAN	sp|O95685|PPR3D_HUMAN	>sp|O95685|PPR3D_HUMAN Protein phosphatase 1 regulatory subunit 3D OS=Homo sapiens OX=9606 GN=PPP1R3D PE=1 SV=1	0.992844	0.00102533	63.143	2	S	GCDPRLRPIILRRARSLPSSPERRQKAAGAP	X;X;X;X;X;X;X;X;X;X;X;X;X;X;X;Phospho (STY);X;X;Phospho (STY);Phospho (STY);X;X;X;X;X;X;X;X;X;X;X	XXXXXXXXXXXXXXXPPPPPPPPPXXXXXXX	S(0.993)LPS(0.613)S(0.394)PERR	1	2	-0.071802			16121;16122;16123	16122	23954	29673	32559	18129	14291	16063
sp|O95685|PPR3D_HUMAN	77	sp|O95685|PPR3D_HUMAN	sp|O95685|PPR3D_HUMAN	>sp|O95685|PPR3D_HUMAN Protein phosphatase 1 regulatory subunit 3D OS=Homo sapiens OX=9606 GN=PPP1R3D PE=1 SV=1	0.612959	0.00121901	44.996	2	S	PRLRPIILRRARSLPSSPERRQKAAGAPGAA	X;X;X;X;X;X;X;X;X;X;X;X;Phospho (STY);X;X;Phospho (STY);X;X;X;X;X;X;X;X;X;X;X;X;X;X;X	XXXXXXXXXXXXPPPPPPPPPXXXXXXXXXX	S(0.993)LPS(0.613)S(0.394)PERR	4	2	-0.071802			16122;16123	16122	14456	18827	20942	11041	8953.8	9762.9
sp|O95685|PPR3D_HUMAN	78	sp|O95685|PPR3D_HUMAN	sp|O95685|PPR3D_HUMAN	>sp|O95685|PPR3D_HUMAN Protein phosphatase 1 regulatory subunit 3D OS=Homo sapiens OX=9606 GN=PPP1R3D PE=1 SV=1	0.990162	0.00102533	63.143	2	S	RLRPIILRRARSLPSSPERRQKAAGAPGAAC	X;X;X;X;X;X;X;X;X;X;X;Phospho (STY);X;X;X;Phospho (STY);X;X;X;X;X;X;X;X;X;X;X;X;X;X;X	XXXXXXXXXXXPPPPPPPPPXXXXXXXXXXX	S(0.865)LPS(0.145)S(0.99)PERR	5	3	0.31421			16121;16123	16121	15678	17759	19450	11833	8799.7	10126
sp|O95696|BRD1_HUMAN	1052	sp|O95696|BRD1_HUMAN	sp|O95696|BRD1_HUMAN	>sp|O95696|BRD1_HUMAN Bromodomain-containing protein 1 OS=Homo sapiens OX=9606 GN=BRD1 PE=1 SV=1	0.957787	0.000762045	48.225	2	S	DRAMNHLSRVHGEPTSDLSDID_________	X;X;X;X;X;X;X;X;X;X;X;X;X;X;X;Phospho (STY);X;X;Phospho (STY);X;X;X;X;X;X;X;X;X;X;X;X	XXXXXXXXXPPPPPPPPPPPPPXXXXXXXXX	VHGEPT(0.043)S(0.958)DLS(0.999)DID	7	2	1.188			19737	19737	14385	20136	17378	10540	10279	9538.8
sp|O95696|BRD1_HUMAN	1055	sp|O95696|BRD1_HUMAN	sp|O95696|BRD1_HUMAN	>sp|O95696|BRD1_HUMAN Bromodomain-containing protein 1 OS=Homo sapiens OX=9606 GN=BRD1 PE=1 SV=1	0.999059	0.000762045	48.225	2	S	MNHLSRVHGEPTSDLSDID____________	X;X;X;X;X;X;X;X;X;X;X;X;Phospho (STY);X;X;Phospho (STY);X;X;X;X;X;X;X;X;X;X;X;X;X;X;X	XXXXXXPPPPPPPPPPPPPXXXXXXXXXXXX	VHGEPT(0.043)S(0.958)DLS(0.999)DID	10	2	1.188			19737	19737	14385	20136	17378	10540	10279	9538.8
sp|O95747|OXSR1_HUMAN	324	sp|O95747|OXSR1_HUMAN	sp|O95747|OXSR1_HUMAN	>sp|O95747|OXSR1_HUMAN Serine/threonine-protein kinase OSR1 OS=Homo sapiens OX=9606 GN=OXSR1 PE=1 SV=1	1	0.00243099	51.978	1;2	S	PTISERAKKVRRVPGSSGRLHKTEDGGWEWS	X;X;X;X;X;X;X;X;X;X;X;X;X;X;X;Phospho (STY);Phospho (STY);X;X;X;X;X;X;X;X;X;X;X;X;X;Phospho (STY)	XXXXXXXXXXXPPPPPPPPXXXXXXXXXXXX	RVPGS(1)S(1)GR	5	2	0.83326			14635;14636;14637	14637	22550	37592	36215	18864	20064	16152
sp|O95747|OXSR1_HUMAN	325	sp|O95747|OXSR1_HUMAN	sp|O95747|OXSR1_HUMAN	>sp|O95747|OXSR1_HUMAN Serine/threonine-protein kinase OSR1 OS=Homo sapiens OX=9606 GN=OXSR1 PE=1 SV=1	1	0.00243099	51.978	1;2	S	TISERAKKVRRVPGSSGRLHKTEDGGWEWSD	X;X;X;X;X;X;X;X;X;X;X;X;X;X;Phospho (STY);Phospho (STY);X;X;X;X;X;X;X;X;X;X;X;X;X;Phospho (STY);X	XXXXXXXXXXPPPPPPPPXXXXXXXXXXXXX	RVPGS(1)S(1)GR	6	2	0.83326			14634;14635;14636;14637	14637	27443	44198	40553	22621	23372	19204
sp|O95747|OXSR1_HUMAN	427	sp|O95747|OXSR1_HUMAN	sp|O95747|OXSR1_HUMAN	>sp|O95747|OXSR1_HUMAN Serine/threonine-protein kinase OSR1 OS=Homo sapiens OX=9606 GN=OXSR1 PE=1 SV=1	0.890894	6.97e-06	73.746	1	S	AEPAKTAQALSSGSGSQETKIPISLVLRLRN	X;X;X;X;X;X;X;X;X;X;X;X;X;X;X;Phospho (STY);X;X;X;X;X;X;X;X;X;X;X;X;X;X;X	XXXXXPPPPPPPPPPPPPPPXXXXXXXXXXX	TAQALSS(0.002)GS(0.1)GS(0.891)QET(0.008)K	11	3	-0.50639			18011	18011	15195	22762	17614	13394	12503	10150
sp|O95747|OXSR1_HUMAN	339	sp|O95747|OXSR1_HUMAN	sp|O95747|OXSR1_HUMAN	>sp|O95747|OXSR1_HUMAN Serine/threonine-protein kinase OSR1 OS=Homo sapiens OX=9606 GN=OXSR1 PE=1 SV=1	0.999999	1.6e-44	169.85	1	S	SSGRLHKTEDGGWEWSDDEFDEESEEGKAAI	Phospho (STY);Phospho (STY);X;X;X;X;X;X;X;X;X;X;X;X;X;Phospho (STY);X;X;X;X;X;X;X;X;X;X;X;X;X;X;X	XXXXXXXPPPPPPPPPPPPPPPPPPPPPXXX	TEDGGWEWS(1)DDEFDEESEEGK	9	3	1.0469			18203;18204;18205;18206;18207;18208;18209	18208	141290	173400	122310	125030	94145	91503
sp|O95758|PTBP3_HUMAN	56	sp|O95758|PTBP3_HUMAN	sp|O95758|PTBP3_HUMAN	>sp|O95758|PTBP3_HUMAN Polypyrimidine tract-binding protein 3 OS=Homo sapiens OX=9606 GN=PTBP3 PE=1 SV=2	0.993329	0.0026425	43.249	1	S	NGNDSKKFKRDRPPCSPSRVLHLRKIPCDVT	X;X;X;X;X;X;X;X;X;X;X;X;X;X;X;Phospho (STY);X;X;X;X;X;X;X;X;X;X;X;X;X;X;X	XXXXXXXXXXPPPPPPPPPXXXXXXXXXXXX	DRPPCS(0.993)PS(0.007)R	6	2	-0.63159			3068;3069;3070;3071	3071	11506	20802	20009	6405.6	6731.1	6487.9
sp|O95772|STR3N_HUMAN	39	sp|O95772|STR3N_HUMAN	sp|O95772|STR3N_HUMAN	>sp|O95772|STR3N_HUMAN STARD3 N-terminal-like protein OS=Homo sapiens OX=9606 GN=STARD3NL PE=1 SV=1	0.997452	0.00938843	52.854	1	S	NIHSINPTQLMARIESYEGREKKGISDVRRT	X;X;X;X;X;X;X;X;X;X;X;X;X;X;X;Phospho (STY);X;X;X;X;X;X;X;X;X;X;X;X;X;X;X	XXXXXXXXXXXXXPPPPPPPXXXXXXXXXXX	IES(0.997)Y(0.003)EGR	3	2	0.040793			7920;7921;7922	7922	19318	64983	55529	15537	24271	18797
sp|O95772|STR3N_HUMAN	193	sp|O95772|STR3N_HUMAN	sp|O95772|STR3N_HUMAN	>sp|O95772|STR3N_HUMAN STARD3 N-terminal-like protein OS=Homo sapiens OX=9606 GN=STARD3NL PE=1 SV=1	1	0.000340061	85.597	1	S	QEAEEENRLLIVQDASERAALIPGGLSDGQF	X;X;X;X;X;X;X;X;X;X;X;X;X;X;X;Phospho (STY);X;X;X;X;X;X;X;X;X;X;X;X;X;X;X	XXXXXXXXPPPPPPPPPPXXXXXXXXXXXXX	LLIVQDAS(1)ER	8	2	-0.16034			10698;10699	10699	25976	47571	41282	18831	19368	16788
sp|O95810|CAVN2_HUMAN	361	sp|O95810|CAVN2_HUMAN	sp|O95810|CAVN2_HUMAN	>sp|O95810|CAVN2_HUMAN Caveolae-associated protein 2 OS=Homo sapiens OX=9606 GN=CAVIN2 PE=1 SV=3	0.545836	8.46e-58	155.34	2	S	LVEGEIAEEAAEKATSRGSNSGMDSNIDLTI	X;X;X;X;X;X;X;X;X;X;X;X;X;X;Phospho (STY);Phospho (STY);X;X;Phospho (STY);X;Phospho (STY);X;Oxidation (M);X;Phospho (STY);X;X;X;X;X;X	XXXXXXXXXXXXXPPPPPPPPPPPPPPPPPP	AT(0.547)S(0.546)RGS(0.485)NS(0.381)GMDS(0.041)NIDLTIVEDEEEESVALEQAQK	3	4	1.1916			2163;2167	2163	15337	13251	11043	13885	10816	10881
sp|O95810|CAVN2_HUMAN	364	sp|O95810|CAVN2_HUMAN	sp|O95810|CAVN2_HUMAN	>sp|O95810|CAVN2_HUMAN Caveolae-associated protein 2 OS=Homo sapiens OX=9606 GN=CAVIN2 PE=1 SV=3	0.91214	1.21e-51	164.02	1;2	S	GEIAEEAAEKATSRGSNSGMDSNIDLTIVED	X;X;X;X;X;X;X;X;X;X;X;X;X;X;X;Phospho (STY);X;Phospho (STY);X;Oxidation (M);X;Phospho (STY);X;X;X;X;X;X;X;X;X	XXXXXXXXXXPPPPPPPPPPPPPPPPPPPPP	GS(0.912)NS(0.088)GMDSNIDLTIVEDEEEESVALEQAQK	2	5	-0.52554			2166;2175;7050;7051;7052;7057;7058;7065;7066;7070;7071;7072;7079;7080;7081;7088;7089;7092;7093;7095;7097;7099	7070	352450	177200	138070	268110	174050	156050
sp|O95810|CAVN2_HUMAN	366	sp|O95810|CAVN2_HUMAN	sp|O95810|CAVN2_HUMAN	>sp|O95810|CAVN2_HUMAN Caveolae-associated protein 2 OS=Homo sapiens OX=9606 GN=CAVIN2 PE=1 SV=3	0.793567	6.8e-69	162.37	1;2	S	IAEEAAEKATSRGSNSGMDSNIDLTIVEDEE	X;X;X;X;X;X;X;X;X;Phospho (STY);X;X;X;Phospho (STY);X;Phospho (STY);X;Oxidation (M);X;Phospho (STY);X;X;X;X;X;X;X;X;X;X;X	XXXXXXXXPPPPPPPPPPPPPPPPPPPPPPP	AT(0.314)S(0.288)RGS(0.583)NS(0.794)GMDS(0.022)NIDLTIVEDEEEESVALEQAQK	8	4	1.5497			2162;2168;2171;2175;7059;7060;7061;7085;7086;7087;7090;7091;7094;7096;7098;7099	2175	139740	92944	70547	112040	71086	63647
sp|O95810|CAVN2_HUMAN	370	sp|O95810|CAVN2_HUMAN	sp|O95810|CAVN2_HUMAN	>sp|O95810|CAVN2_HUMAN Caveolae-associated protein 2 OS=Homo sapiens OX=9606 GN=CAVIN2 PE=1 SV=3	0.999942	1.7e-41	141.01	1;2	S	AAEKATSRGSNSGMDSNIDLTIVEDEEEESV	X;X;X;X;X;Phospho (STY);X;X;X;Phospho (STY);X;Phospho (STY);X;Oxidation (M);X;Phospho (STY);X;X;X;X;X;X;X;X;X;X;X;X;X;X;X	XXXXPPPPPPPPPPPPPPPPPPPPPPPPPPP	GS(0.254)NS(0.746)GMDS(1)NIDLTIVEDEEEESVALEQAQK	8	4	-0.45491			2160;2161;2164;2166;2170;2172;2173;2174;7049;7053;7054;7055;7062;7063;7067;7068;7069;7075;7076;7077;7082;7083;7084;7090;7091;7092;7093;7094;7095;7096;7097;7098;7099	7091	437490	242010	181610	328500	170150	155190
sp|O95810|CAVN2_HUMAN	24	sp|O95810|CAVN2_HUMAN	sp|O95810|CAVN2_HUMAN	>sp|O95810|CAVN2_HUMAN Caveolae-associated protein 2 OS=Homo sapiens OX=9606 GN=CAVIN2 PE=1 SV=3	0.497443	1.13e-33	119.94		S	EKFQHPGSDMRQEKPSSPSPMPSSTPSPSLN	X;X;X;X;X;X;X;X;X;X;X;X;X;X;X;Phospho (STY);X;X;X;X;X;X;X;X;X;X;X;X;X;X;X	XXXXXXXXXXXPPPPPPPPPPPPPPPPPPPP	QEKPS(0.497)S(0.387)PS(0.114)PMPS(0.001)S(0.001)TPSPSLNLGNTEEAIR	5	3	-0.18206				12284	0	0	0	0	0	0
sp|O95810|CAVN2_HUMAN	25	sp|O95810|CAVN2_HUMAN	sp|O95810|CAVN2_HUMAN	>sp|O95810|CAVN2_HUMAN Caveolae-associated protein 2 OS=Homo sapiens OX=9606 GN=CAVIN2 PE=1 SV=3	0.605197	1.31e-20	93.701	1	S	KFQHPGSDMRQEKPSSPSPMPSSTPSPSLNL	X;X;X;X;X;X;X;X;X;X;X;X;X;X;X;Phospho (STY);X;X;X;X;X;X;X;X;X;X;X;X;X;X;X	XXXXXXXXXXPPPPPPPPPPPPPPPPPPPPP	QEKPS(0.197)S(0.605)PS(0.197)PMPS(0.001)STPSPSLNLGNTEEAIR	6	3	-0.6077			12292	12292	6264	7967.6	7236.4	5677	12029	8694.3
sp|O95810|CAVN2_HUMAN	27	sp|O95810|CAVN2_HUMAN	sp|O95810|CAVN2_HUMAN	>sp|O95810|CAVN2_HUMAN Caveolae-associated protein 2 OS=Homo sapiens OX=9606 GN=CAVIN2 PE=1 SV=3	0.702946	1.31e-20	93.701	1	S	QHPGSDMRQEKPSSPSPMPSSTPSPSLNLGN	X;X;X;X;X;X;X;X;X;X;X;X;X;X;X;Phospho (STY);X;Oxidation (M);X;X;X;X;X;X;X;X;X;X;X;X;X	XXXXXXXXPPPPPPPPPPPPPPPPPPPPPPP	QEKPS(0.075)S(0.195)PS(0.703)PMPS(0.01)S(0.01)T(0.004)PS(0.002)PSLNLGNTEEAIR	8	4	-0.60139			12281;12282;12285	12281	27399	25500	22446	23972	16906	15126
sp|O95810|CAVN2_HUMAN	31	sp|O95810|CAVN2_HUMAN	sp|O95810|CAVN2_HUMAN	>sp|O95810|CAVN2_HUMAN Caveolae-associated protein 2 OS=Homo sapiens OX=9606 GN=CAVIN2 PE=1 SV=3	0.849898	2.1e-41	140.24	1;4	S	SDMRQEKPSSPSPMPSSTPSPSLNLGNTEEA	X;X;X;X;X;X;X;X;X;X;X;X;X;X;X;Phospho (STY);Phospho (STY);Phospho (STY);X;Phospho (STY);X;X;X;X;X;X;X;X;X;X;X	XXXXPPPPPPPPPPPPPPPPPPPPPPPPPPP	QEKPS(0.128)S(0.128)PS(0.193)PMPS(0.85)S(0.85)T(0.85)PS(0.85)PS(0.148)LNLGNT(0.004)EEAIR	12	4	1.7125			12286;12298	12298	15803	14847	12893	12202	9601.1	8714.4
sp|O95810|CAVN2_HUMAN	32	sp|O95810|CAVN2_HUMAN	sp|O95810|CAVN2_HUMAN	>sp|O95810|CAVN2_HUMAN Caveolae-associated protein 2 OS=Homo sapiens OX=9606 GN=CAVIN2 PE=1 SV=3	0.849898	7.28e-11	75.639	2;3;4	S	DMRQEKPSSPSPMPSSTPSPSLNLGNTEEAI	X;X;X;X;X;X;X;X;X;X;X;X;X;X;Phospho (STY);Phospho (STY);Phospho (STY);X;Phospho (STY);X;X;X;X;X;X;X;X;X;X;X;X	XXXPPPPPPPPPPPPPPPPPPPPPPPPPPPP	QEKPS(0.128)S(0.128)PS(0.193)PMPS(0.85)S(0.85)T(0.85)PS(0.85)PS(0.148)LNLGNT(0.004)EEAIR	13	4	1.7125			12293;12294;12295;12296;12297;12298	12298	38092	41539	31086	31330	27437	22998
sp|O95810|CAVN2_HUMAN	35	sp|O95810|CAVN2_HUMAN	sp|O95810|CAVN2_HUMAN	>sp|O95810|CAVN2_HUMAN Caveolae-associated protein 2 OS=Homo sapiens OX=9606 GN=CAVIN2 PE=1 SV=3	0.849898	7.36e-11	76.52	3;4	S	QEKPSSPSPMPSSTPSPSLNLGNTEEAIRDN	X;X;X;X;X;X;X;X;X;X;X;Phospho (STY);Phospho (STY);Phospho (STY);X;Phospho (STY);X;X;X;X;X;X;X;X;X;X;X;X;X;X;X	PPPPPPPPPPPPPPPPPPPPPPPPPPPPPXX	QEKPS(0.128)S(0.128)PS(0.193)PMPS(0.85)S(0.85)T(0.85)PS(0.85)PS(0.148)LNLGNT(0.004)EEAIR	16	4	1.7125			12297;12298	12298	13732	14495	11218	11287	10379	8556.9
sp|O95810|CAVN2_HUMAN	203	sp|O95810|CAVN2_HUMAN	sp|O95810|CAVN2_HUMAN	>sp|O95810|CAVN2_HUMAN Caveolae-associated protein 2 OS=Homo sapiens OX=9606 GN=CAVIN2 PE=1 SV=3	1	6.04e-104	227.59	1;2;3	S	DENKSLEETLHTVDLSSDDDLPHDEEALEDS	X;X;X;X;X;X;X;X;X;X;X;X;X;X;X;Phospho (STY);Phospho (STY);X;X;X;X;X;X;X;X;X;X;X;X;X;Phospho (STY)	XXXXPPPPPPPPPPPPPPPPPPPPPPPPPPP	SLEETLHTVDLS(1)S(1)DDDLPHDEEALEDSAEEK	12	4	0.84425			15971;15974;15975;15976;15977;15978;15979;15980;15982;15983;15984;15985;15986;15987;15988;15989;15990;15991;15992;15993	15978	163300	131800	95148	133400	116910	94638
sp|O95810|CAVN2_HUMAN	204	sp|O95810|CAVN2_HUMAN	sp|O95810|CAVN2_HUMAN	>sp|O95810|CAVN2_HUMAN Caveolae-associated protein 2 OS=Homo sapiens OX=9606 GN=CAVIN2 PE=1 SV=3	1	6.04e-104	227.59	1;2;3	S	ENKSLEETLHTVDLSSDDDLPHDEEALEDSA	X;X;X;X;X;X;X;X;X;X;X;X;X;X;Phospho (STY);Phospho (STY);X;X;X;X;X;X;X;X;X;X;X;X;X;Phospho (STY);X	XXXPPPPPPPPPPPPPPPPPPPPPPPPPPPP	SLEETLHTVDLS(1)S(1)DDDLPHDEEALEDSAEEK	13	4	0.84425			15971;15972;15974;15975;15976;15977;15978;15979;15980;15981;15982;15983;15984;15985;15986;15987;15988;15989;15990;15991;15992;15993	15978	175470	143470	103810	143560	126020	101260
sp|O95810|CAVN2_HUMAN	218	sp|O95810|CAVN2_HUMAN	sp|O95810|CAVN2_HUMAN	>sp|O95810|CAVN2_HUMAN Caveolae-associated protein 2 OS=Homo sapiens OX=9606 GN=CAVIN2 PE=1 SV=3	1	8.93e-83	201.49	2;3	S	SSDDDLPHDEEALEDSAEEKVEESRAEKIKR	Phospho (STY);Phospho (STY);X;X;X;X;X;X;X;X;X;X;X;X;X;Phospho (STY);X;X;X;X;X;X;X;X;X;X;X;X;X;X;X	PPPPPPPPPPPPPPPPPPPPXXXXXXXXXXX	SLEETLHT(0.007)VDLS(0.995)S(0.998)DDDLPHDEEALEDS(1)AEEK	27	4	0.34101			15981;15986;15987;15988;15989;15990;15991;15992;15993	15991	73789	56156	40720	55768	47398	38827
sp|O95810|CAVN2_HUMAN	287	sp|O95810|CAVN2_HUMAN	sp|O95810|CAVN2_HUMAN	>sp|O95810|CAVN2_HUMAN Caveolae-associated protein 2 OS=Homo sapiens OX=9606 GN=CAVIN2 PE=1 SV=3	0.808502	4.33e-14	121.84	1;2	S	KKSLTSNHQKISSGKSSPFKVSPLTFGRKKV	X;X;X;X;X;X;X;X;X;X;X;X;X;X;X;Phospho (STY);X;X;X;X;X;Phospho (STY);X;X;X;X;X;X;X;X;X	XXXXXXXXXXXXXXXPPPPPPPPPPPPPXXX	S(0.809)S(0.303)PFKVS(0.854)PLT(0.035)FGR	1	2	0.87613			17253;17254;17256;17257	17256	161770	63636	45561	116840	55284	45260
sp|O95810|CAVN2_HUMAN	288	sp|O95810|CAVN2_HUMAN	sp|O95810|CAVN2_HUMAN	>sp|O95810|CAVN2_HUMAN Caveolae-associated protein 2 OS=Homo sapiens OX=9606 GN=CAVIN2 PE=1 SV=3	0.89826	2.34e-09	96.842	2	S	KSLTSNHQKISSGKSSPFKVSPLTFGRKKVR	X;X;X;X;X;X;X;X;X;X;X;X;X;X;X;Phospho (STY);X;X;X;X;Phospho (STY);X;X;X;X;X;X;X;X;X;X	XXXXXXXXXXXXXXPPPPPPPPPPPPPXXXX	S(0.102)S(0.898)PFKVS(0.999)PLT(0.001)FGR	2	2	0.75282			17255;17258	17258	101120	41226	29087	75314	32015	25750
sp|O95810|CAVN2_HUMAN	293	sp|O95810|CAVN2_HUMAN	sp|O95810|CAVN2_HUMAN	>sp|O95810|CAVN2_HUMAN Caveolae-associated protein 2 OS=Homo sapiens OX=9606 GN=CAVIN2 PE=1 SV=3	0.999979	4.33e-14	121.84	1;2	S	NHQKISSGKSSPFKVSPLTFGRKKVREGESH	X;X;X;X;X;X;X;X;X;Phospho (STY);Phospho (STY);X;X;X;X;Phospho (STY);X;X;X;X;X;X;X;X;X;X;X;X;X;X;X	XXXXXXXXXPPPPPPPPPPPPPXXXXXXXXX	VS(1)PLTFGR	2	2	-0.60244			17251;17252;17254;17255;17256;17257;17258;20229;20230;20231	20231	470470	190150	148240	352870	196530	150900
sp|O95810|CAVN2_HUMAN	403	sp|O95810|CAVN2_HUMAN	sp|O95810|CAVN2_HUMAN	>sp|O95810|CAVN2_HUMAN Caveolae-associated protein 2 OS=Homo sapiens OX=9606 GN=CAVIN2 PE=1 SV=3	0.574807	7.74e-06	41.844	1	S	EQAQKVRYEGSYALTSEEAERSDGDPVQPAV	X;X;X;X;X;X;X;X;X;X;X;X;X;X;X;Phospho (STY);X;X;X;X;X;X;X;X;X;X;X;X;X;X;X	XXXXXXXPPPPPPPPPPPPPPPPPPPPPPPP	YEGS(0.004)Y(0.001)ALT(0.208)S(0.575)EEAERS(0.211)DGDPVQPAVLQVHQTS	9	4	0.20358			20524	20524	7736.2	12828	9802.5	7695.4	6153.5	4546.5
sp|O95810|CAVN2_HUMAN	409	sp|O95810|CAVN2_HUMAN	sp|O95810|CAVN2_HUMAN	>sp|O95810|CAVN2_HUMAN Caveolae-associated protein 2 OS=Homo sapiens OX=9606 GN=CAVIN2 PE=1 SV=3	0.998624	1.15e-22	102.61	1	S	RYEGSYALTSEEAERSDGDPVQPAVLQVHQT	X;X;X;X;X;X;X;X;X;X;X;X;X;X;X;Phospho (STY);X;X;X;X;X;X;X;X;X;X;X;X;X;X;X	XPPPPPPPPPPPPPPPPPPPPPPPPPPPPPP	YEGSYALTS(0.001)EEAERS(0.999)DGDPVQPAVLQVHQTS	15	4	2.1845			20521;20522;20523	20521	30391	35129	24983	24522	19287	17750
sp|O95816|BAG2_HUMAN	20	sp|O95816|BAG2_HUMAN	sp|O95816|BAG2_HUMAN	>sp|O95816|BAG2_HUMAN BAG family molecular chaperone regulator 2 OS=Homo sapiens OX=9606 GN=BAG2 PE=1 SV=1	0.991711	0.0091967	83.141	1	S	KINAKANEGRFCRSSSMADRSSRLLESLDQL	X;X;X;X;X;X;X;X;X;X;X;X;X;X;X;Phospho (STY);X;X;X;X;X;X;X;X;X;X;X;X;X;X;X	XXXXXXXXXXXXXPPPPPPPXXXXXXXXXXX	SS(0.008)S(0.992)MADR	3	2	-0.0083226			17404;17405	17405	16860	36341	19495	11776	12788	12830
sp|O95817|BAG3_HUMAN	173	sp|O95817|BAG3_HUMAN	sp|O95817|BAG3_HUMAN	>sp|O95817|BAG3_HUMAN BAG family molecular chaperone regulator 3 OS=Homo sapiens OX=9606 GN=BAG3 PE=1 SV=3	0.714243	2.4e-17	87.684	1	S	AAAQPPASHGPERSQSPAASDCSSSSSSASL	X;X;X;X;X;X;X;X;X;X;X;X;X;X;X;Phospho (STY);X;X;X;X;X;X;X;X;X;X;X;X;X;X;X	XXXXXXXXXXXXXPPPPPPPPPPPPPPPPPP	S(0.26)QS(0.714)PAAS(0.024)DCS(0.001)SSSSSASLPSSGR	3	3	0.42924			16796;16797	16797	8891.5	12497	10194	6964.7	5523.6	5286.5
sp|O95817|BAG3_HUMAN	377	sp|O95817|BAG3_HUMAN	sp|O95817|BAG3_HUMAN	>sp|O95817|BAG3_HUMAN BAG family molecular chaperone regulator 3 OS=Homo sapiens OX=9606 GN=BAG3 PE=1 SV=3	0.94666	0.000685364	37.372	1;2	S	VEVKVPPAPVPCPPPSPGPSAVPSSPKSVAT	X;X;X;X;X;X;X;X;X;X;X;X;X;X;X;Phospho (STY);X;X;X;X;X;X;X;X;Phospho (STY);X;X;X;X;X;X	XXXXPPPPPPPPPPPPPPPPPPPPPPPXXXX	VPPAPVPCPPPS(0.947)PGPS(0.067)AVPS(0.293)S(0.693)PK	12	4	-0.29006			20034;20036;20037	20036	35019	51052	59917	27381	36397	34525
sp|O95817|BAG3_HUMAN	381	sp|O95817|BAG3_HUMAN	sp|O95817|BAG3_HUMAN	>sp|O95817|BAG3_HUMAN BAG family molecular chaperone regulator 3 OS=Homo sapiens OX=9606 GN=BAG3 PE=1 SV=3	0.431598	0.000736574	26.906		S	VPPAPVPCPPPSPGPSAVPSSPKSVATEERA	X;X;X;X;X;X;X;X;X;X;X;X;X;X;X;Phospho (STY);X;X;X;X;X;X;X;X;X;X;X;X;X;X;X	PPPPPPPPPPPPPPPPPPPPPPPXXXXXXXX	VPPAPVPCPPPS(0.129)PGPS(0.432)AVPS(0.24)S(0.199)PK	16	4	-0.32127				20035	0	0	0	0	0	0
sp|O95817|BAG3_HUMAN	386	sp|O95817|BAG3_HUMAN	sp|O95817|BAG3_HUMAN	>sp|O95817|BAG3_HUMAN BAG family molecular chaperone regulator 3 OS=Homo sapiens OX=9606 GN=BAG3 PE=1 SV=3	0.693253	0.000685364	37.372	2	S	VPCPPPSPGPSAVPSSPKSVATEERAAPSTA	X;X;X;X;X;X;Phospho (STY);X;X;X;X;X;X;X;X;Phospho (STY);X;X;X;X;X;X;X;X;X;X;X;X;X;X;X	PPPPPPPPPPPPPPPPPPXXXXXXXXXXXXX	VPPAPVPCPPPS(0.947)PGPS(0.067)AVPS(0.293)S(0.693)PK	21	4	-0.29006			20036;20037	20036	23300	34884	44398	18309	23982	24472
sp|O95819|M4K4_HUMAN	710	sp|O95819|M4K4_HUMAN	sp|O95819|M4K4_HUMAN	>sp|O95819|M4K4_HUMAN Mitogen-activated protein kinase kinase kinase kinase 4 OS=Homo sapiens OX=9606 GN=MAP4K4 PE=1 SV=2	0.757928	0.00302335	39.889	1	S	GSQSGSGERFRVRSSSKSEGSPSQRLENAVK	X;X;X;X;X;X;X;X;X;X;X;X;X;X;X;Phospho (STY);X;X;X;X;X;X;X;X;X;X;X;X;X;X;X	XXXXXXXXXXXXXPPPPPPPPPPPPXXXXXX	S(0.064)S(0.05)S(0.758)KS(0.015)EGS(0.076)PS(0.037)QR	3	3	-0.065313			17378;17379;17380	17379	43284	45877	30260	23743	16987	23021
sp|O95831|AIFM1_HUMAN	519	sp|O95831|AIFM1_HUMAN	sp|O95831|AIFM1_HUMAN	>sp|O95831|AIFM1_HUMAN Apoptosis-inducing factor 1, mitochondrial OS=Homo sapiens OX=9606 GN=AIFM1 PE=1 SV=1	0.686529	0.00266366	33.486	1	S	TVGVFAKATAQDNPKSATEQSGTGIRSESET	X;X;X;X;X;X;X;X;X;X;X;X;X;X;X;Phospho (STY);X;X;X;X;X;X;X;X;X;X;X;X;X;X;X	XXXXXXXPPPPPPPPPPPPPPPPPPPXXXXX	AT(0.001)AQDNPKS(0.687)AT(0.092)EQS(0.11)GT(0.11)GIR	9	3	-0.44505			2047	2047	6437.5	17091	11896	5780	5727.8	4144.4
sp|O95831|AIFM1_HUMAN	268	sp|O95831|AIFM1_HUMAN	sp|O95831|AIFM1_HUMAN	>sp|O95831|AIFM1_HUMAN Apoptosis-inducing factor 1, mitochondrial OS=Homo sapiens OX=9606 GN=AIFM1 PE=1 SV=1	0.996551	0.012427	12.419	1	S	YEKCLIATGGTPRSLSAIDRAGAEVKSRTTL	X;X;X;X;X;X;X;X;X;X;X;X;X;X;X;Phospho (STY);X;X;X;X;X;X;X;X;X;X;X;X;X;X;X	XXXXXXXXXXXXXPPPPPPPXXXXXXXXXXX	S(0.003)LS(0.997)AIDR	3	2	0.26183			16142;16143	16143	18282	58978	29673	14796	16057	14483
sp|O95873|CF047_HUMAN	112	sp|O95873|CF047_HUMAN	sp|O95873|CF047_HUMAN	>sp|O95873|CF047_HUMAN Uncharacterized protein C6orf47 OS=Homo sapiens OX=9606 GN=C6orf47 PE=1 SV=2	1	0.001794	16.617	1	S	ISSTQESGRLEAGGASPKLRWDHVDSGGTRR	X;X;X;X;X;X;X;X;X;X;X;X;X;X;X;Phospho (STY);X;X;X;X;X;X;X;X;X;X;X;X;X;X;X	XXXXXXXXXPPPPPPPPPXXXXXXXXXXXXX	LEAGGAS(1)PK	7	3	-0.67727			10241;10242	10242	5269.4	14587	16311	3785.9	4913	4278.3
sp|O95999|BCL10_HUMAN	138	sp|O95999|BCL10_HUMAN	sp|O95999|BCL10_HUMAN	>sp|O95999|BCL10_HUMAN B-cell lymphoma/leukemia 10 OS=Homo sapiens OX=9606 GN=BCL10 PE=1 SV=1	0.832169	3.79e-07	105.45	1	S	EPFPDGATNNLSRSNSDESNFSEKLRASTVM	X;X;X;X;X;X;X;X;X;X;X;X;X;X;X;Phospho (STY);X;X;X;X;X;X;X;X;X;X;X;X;X;X;X	XXXXXXXXXXXXXPPPPPPPPPPPXXXXXXX	S(0.158)NS(0.832)DES(0.01)NFSEK	3	3	-1.7198			16308;16309;16310	16309	42734	118840	63416	34785	39818	31986
sp|O96013|PAK4_HUMAN	104	sp|O96013|PAK4_HUMAN	sp|O96013|PAK4_HUMAN	>sp|O96013|PAK4_HUMAN Serine/threonine-protein kinase PAK 4 OS=Homo sapiens OX=9606 GN=PAK4 PE=1 SV=1	1	0.000359853	67.245	1	S	FENMSVTRSNSLRRDSPPPPARARQENGMPE	X;X;X;X;X;X;X;X;X;X;X;X;X;X;X;Phospho (STY);X;X;X;X;X;X;X;X;X;X;X;X;X;X;X	XXXXXXXXXXXXXPPPPPPPPPXXXXXXXXX	RDS(1)PPPPAR	3	3	0.13564			13173;13174;13175;13176;13177;13178	13178	29070	39673	23285	19725	15252	14513
sp|P00533|EGFR_HUMAN	1166	sp|P00533|EGFR_HUMAN	sp|P00533|EGFR_HUMAN	>sp|P00533|EGFR_HUMAN Epidermal growth factor receptor OS=Homo sapiens OX=9606 GN=EGFR PE=1 SV=2	0.983203	5.71e-10	75.012	1	S	FDSPAHWAQKGSHQISLDNPDYQQDFFPKEA	X;X;X;X;X;X;X;X;X;X;X;X;X;X;X;Phospho (STY);X;X;X;X;X;X;X;X;X;X;X;X;X;X;X	XXXXXXXXXXPPPPPPPPPPPPPPPPPPPXX	GS(0.017)HQIS(0.983)LDNPDYQQDFFPK	6	4	-0.3147			6984;6985	6984	24436	44557	33028	16264	17737	16129
sp|P00533|EGFR_HUMAN	1039	sp|P00533|EGFR_HUMAN	sp|P00533|EGFR_HUMAN	>sp|P00533|EGFR_HUMAN Epidermal growth factor receptor OS=Homo sapiens OX=9606 GN=EGFR PE=1 SV=2	0.896087	1.58e-07	61.053	1;2	S	FSSPSTSRTPLLSSLSATSNNSTVACIDRNG	X;X;X;X;X;X;X;X;X;X;X;X;X;X;X;Phospho (STY);X;X;Phospho (STY);X;X;X;X;X;X;X;X;X;X;X;X	XXXXXXXXPPPPPPPPPPPPPPPPPPPPPXX	T(0.002)PLLS(0.016)S(0.06)LS(0.896)AT(0.025)S(0.002)NNSTVACIDR	8	3	0.71048			18652;18653	18653	11125	17322	13166	10922	9359.5	8489.3
sp|P00533|EGFR_HUMAN	1042	sp|P00533|EGFR_HUMAN	sp|P00533|EGFR_HUMAN	>sp|P00533|EGFR_HUMAN Epidermal growth factor receptor OS=Homo sapiens OX=9606 GN=EGFR PE=1 SV=2	0.751589	0.000235038	46.593	2	S	PSTSRTPLLSSLSATSNNSTVACIDRNGLQS	X;X;X;X;X;X;X;X;X;X;X;X;Phospho (STY);X;X;Phospho (STY);X;X;X;X;X;X;X;X;X;X;X;X;X;X;X	XXXXXPPPPPPPPPPPPPPPPPPPPPXXXXX	T(0.003)PLLS(0.036)S(0.146)LS(0.664)AT(0.363)S(0.752)NNS(0.026)T(0.01)VACIDR	11	3	-1.4117			18652	18652	4043.8	5526.7	5136.8	3676	3448.2	3505.4
sp|P00558|PGK1_HUMAN	203	sp|P00558|PGK1_HUMAN	sp|P00558|PGK1_HUMAN	>sp|P00558|PGK1_HUMAN Phosphoglycerate kinase 1 OS=Homo sapiens OX=9606 GN=PGK1 PE=1 SV=3	1	3.47e-10	89.202	1	S	FLMKKELNYFAKALESPERPFLAILGGAKVA	X;X;X;X;X;X;X;X;X;X;X;X;X;X;X;Phospho (STY);X;X;X;X;X;X;X;X;X;X;X;X;X;X;X	XXXXXXXXXXXXPPPPPPPPPPPPPPPPPXX	ALES(1)PERPFLAILGGAK	4	3	-2.0419			1138	1138	11071	20514	17694	9974.4	9102.4	7975.9
sp|P00915|CAH1_HUMAN	88	sp|P00915|CAH1_HUMAN	sp|P00915|CAH1_HUMAN	>sp|P00915|CAH1_HUMAN Carbonic anhydrase 1 OS=Homo sapiens OX=9606 GN=CA1 PE=1 SV=2	0.970973	0.0134577	42.972	1	S	DNDNRSVLKGGPFSDSYRLFQFHFHWGSTNE	X;X;X;X;X;X;X;X;X;X;X;X;X;X;X;Phospho (STY);X;X;X;X;X;X;X;X;X;X;X;X;X;X;X	XXXXXXXXXPPPPPPPPPXXXXXXXXXXXXX	GGPFS(0.024)DS(0.971)Y(0.005)R	7	2	0.82684			6072	6072	14968	22954	18583	19344	15232	13760
sp|P01008|ANT3_HUMAN	68	sp|P01008|ANT3_HUMAN	sp|P01008|ANT3_HUMAN	>sp|P01008|ANT3_HUMAN Antithrombin-III OS=Homo sapiens OX=9606 GN=SERPINC1 PE=1 SV=1	0.999998	3.85e-30	141.04	1	S	CIYRSPEKKATEDEGSEQKIPEATNRRVWEL	X;X;X;X;X;X;X;X;X;X;X;X;X;X;X;Phospho (STY);X;X;X;X;X;X;X;X;X;X;X;X;X;X;X	XXXXXXXXXPPPPPPPPPPPPPPPPPXXXXX	ATEDEGS(1)EQKIPEATNR	7	3	-0.34762			2060;2061;2062;2063	2063	57747	60422	49093	57428	65122	75631
sp|P01042|KNG1_HUMAN	332	sp|P01042|KNG1_HUMAN	sp|P01042|KNG1_HUMAN	>sp|P01042|KNG1_HUMAN Kininogen-1 OS=Homo sapiens OX=9606 GN=KNG1 PE=1 SV=2	0.999702	9.24e-60	184.9	1	S	YFIDFVARETTCSKESNEELTESCETKKLGQ	X;X;X;X;X;X;X;X;X;X;X;X;X;X;X;Phospho (STY);X;X;X;X;X;X;X;X;X;X;X;X;X;X;X	XXXXXXXXPPPPPPPPPPPPPPPPPPPPXXX	ETTCSKES(1)NEELTESCETK	8	2	0.53184			5027;5028;5029;5030;5032;5033;5034;5035;5036;5037;5038;5039;5040;5041;5042;5043;5044;5045;5046;5047;5048;5049;5050;5051;5052;5053	5030	360450	345680	323600	433500	373330	409250
sp|P01833|PIGR_HUMAN	708	sp|P01833|PIGR_HUMAN	sp|P01833|PIGR_HUMAN	>sp|P01833|PIGR_HUMAN Polymeric immunoglobulin receptor OS=Homo sapiens OX=9606 GN=PIGR PE=1 SV=4	0.270179	1.78e-06	48.25		S	GANDNMGASSITQETSLGGKEEFVATTESTT	X;X;X;X;X;X;X;X;X;X;X;X;X;X;X;X;X;X;X;X;X;X;X;X;X;X;X;X;X;X;X	XXXXXXXXXXXXXXXXXXXXXXXXXXXXXXX	EFGANDNMGAS(0.029)S(0.079)IT(0.27)QET(0.27)S(0.27)LGGKEEFVAT(0.034)T(0.04)ES(0.006)T(0.002)T(0.001)ETK	18	4	1.9117				3794	0	0	0	0	0	0
sp|P01833|PIGR_HUMAN	673	sp|P01833|PIGR_HUMAN	sp|P01833|PIGR_HUMAN	>sp|P01833|PIGR_HUMAN Polymeric immunoglobulin receptor OS=Homo sapiens OX=9606 GN=PIGR PE=1 SV=4	1	0.00102913	39.944	1;2	S	VGVARARHRKNVDRVSIRSYRTDISMSDFEN	X;X;X;X;X;X;X;X;X;X;X;X;X;X;X;Phospho (STY);X;X;Phospho (STY);X;X;X;X;X;Phospho (STY);X;X;X;X;X;X	XXXXXXXXXXPPPPPPPPPPPXXXXXXXXXX	NVDRVS(1)IR	6	3	-0.60296			11992;11993;11994;11995;11996	11995	30000	45543	95892	16973	15553	14237
sp|P01833|PIGR_HUMAN	676	sp|P01833|PIGR_HUMAN	sp|P01833|PIGR_HUMAN	>sp|P01833|PIGR_HUMAN Polymeric immunoglobulin receptor OS=Homo sapiens OX=9606 GN=PIGR PE=1 SV=4	0.999131	0.0119449	41.775	2	S	ARARHRKNVDRVSIRSYRTDISMSDFENSRE	X;X;X;X;X;X;X;X;X;X;X;X;Phospho (STY);X;X;Phospho (STY);X;X;X;X;X;Phospho (STY);X;X;X;X;X;X;X;X;X	XXXXXXXPPPPPPPPPPPXXXXXXXXXXXXX	NVDRVS(1)IRS(0.999)Y(0.001)R	9	2	1.0338			11996	11996	7212.5	7712	14727	4663.9	3805.4	4607
sp|P01833|PIGR_HUMAN	734	sp|P01833|PIGR_HUMAN	sp|P01833|PIGR_HUMAN	>sp|P01833|PIGR_HUMAN Polymeric immunoglobulin receptor OS=Homo sapiens OX=9606 GN=PIGR PE=1 SV=4	0.5	5.93e-06	73.953	1	S	TESTTETKEPKKAKRSSKEEAEMAYKDFLLQ	X;X;X;X;X;X;X;X;X;X;X;X;X;X;X;Phospho (STY);X;X;X;X;X;X;Oxidation (M);X;X;X;X;X;X;X;X	XXXXXXXXXXXXXXPPPPPPPPPPPPXXXXX	RS(0.5)S(0.5)KEEAEMAYK	2	4	0.70861			14412;14414;14416;14417	14414	40228	66941	95068	26081	24493	23890
sp|P01833|PIGR_HUMAN	735	sp|P01833|PIGR_HUMAN	sp|P01833|PIGR_HUMAN	>sp|P01833|PIGR_HUMAN Polymeric immunoglobulin receptor OS=Homo sapiens OX=9606 GN=PIGR PE=1 SV=4	0.802597	5.93e-06	72.587	1	S	ESTTETKEPKKAKRSSKEEAEMAYKDFLLQS	X;X;X;X;X;X;X;X;X;X;X;X;X;X;X;Phospho (STY);X;X;X;X;X;X;X;X;X;X;X;X;X;X;X	XXXXXXXXXXXXXPPPPPPPPPPPPXXXXXX	S(0.197)S(0.803)KEEAEMAYK	2	3	-0.081571			14412;14413;14414;14415;14416;14417;17183	17183	96541	148020	251130	62152	58678	55638
sp|P01833|PIGR_HUMAN	682	sp|P01833|PIGR_HUMAN	sp|P01833|PIGR_HUMAN	>sp|P01833|PIGR_HUMAN Polymeric immunoglobulin receptor OS=Homo sapiens OX=9606 GN=PIGR PE=1 SV=4	0.976648	2.28e-11	107.79	1	S	KNVDRVSIRSYRTDISMSDFENSREFGANDN	X;X;X;X;X;X;Phospho (STY);X;X;Phospho (STY);X;X;X;X;X;Phospho (STY);X;X;X;X;X;X;X;X;X;X;X;X;X;X;X	XXXXXXXXXXXXPPPPPPPPPPPPXXXXXXX	T(0.015)DIS(0.977)MS(0.008)DFENSR	4	3	0.18248			18139;18140;18141	18140	40760	62601	112860	25554	23557	23372
sp|P01889|HLAB_HUMAN	352	sp|P01889|HLAB_HUMAN	sp|P01889|HLAB_HUMAN	>sp|P01889|HLAB_HUMAN HLA class I histocompatibility antigen, B alpha chain OS=Homo sapiens OX=9606 GN=HLA-B PE=1 SV=3	0.350043	1.88e-05	52.592		S	SGGKGGSYSQAACSDSAQGSDVSLTA_____	X;X;X;X;X;X;X;X;X;X;X;X;X;X;X;Phospho (STY);X;X;X;X;X;X;X;X;X;X;X;X;X;X;X	XXXXPPPPPPPPPPPPPPPPPPPPPPXXXXX	GGSYSQAACS(0.026)DS(0.35)AQGS(0.304)DVS(0.264)LT(0.056)A	12	3	-0.10158				6125	0	0	0	0	0	0
sp|P01889|HLAB_HUMAN	356	sp|P01889|HLAB_HUMAN	sp|P01889|HLAB_HUMAN	>sp|P01889|HLAB_HUMAN HLA class I histocompatibility antigen, B alpha chain OS=Homo sapiens OX=9606 GN=HLA-B PE=1 SV=3	0.822025	2.19e-06	64.002	2	S	GGSYSQAACSDSAQGSDVSLTA_________	X;X;X;X;X;X;X;X;X;X;X;X;X;X;X;Phospho (STY);X;X;Phospho (STY);X;X;X;X;X;X;X;X;X;X;X;X	PPPPPPPPPPPPPPPPPPPPPPXXXXXXXXX	GGSYSQAACS(0.001)DS(0.005)AQGS(0.822)DVS(0.822)LT(0.35)A	16	3	-0.12727			6126;6127	6126	22987	27247	26057	21324	14434	15296
sp|P01889|HLAB_HUMAN	359	sp|P01889|HLAB_HUMAN	sp|P01889|HLAB_HUMAN	>sp|P01889|HLAB_HUMAN HLA class I histocompatibility antigen, B alpha chain OS=Homo sapiens OX=9606 GN=HLA-B PE=1 SV=3	0.822025	2.19e-06	64.002	2	S	YSQAACSDSAQGSDVSLTA____________	X;X;X;X;X;X;X;X;X;X;X;X;Phospho (STY);X;X;Phospho (STY);X;X;X;X;X;X;X;X;X;X;X;X;X;X;X	PPPPPPPPPPPPPPPPPPPXXXXXXXXXXXX	GGSYSQAACS(0.001)DS(0.005)AQGS(0.822)DVS(0.822)LT(0.35)A	19	3	-0.12727			6126;6127	6126	22987	27247	26057	21324	14434	15296
sp|P02042|HBD_HUMAN	50	sp|P02042|HBD_HUMAN	sp|P02042|HBD_HUMAN	>sp|P02042|HBD_HUMAN Hemoglobin subunit delta OS=Homo sapiens OX=9606 GN=HBD PE=1 SV=2	0.499771	2.92e-05	53.489		S	VYPWTQRFFESFGDLSSPDAVMGNPKVKAHG	X;X;X;X;X;X;X;X;X;X;X;X;X;X;X;Phospho (STY);X;X;X;X;X;X;X;X;X;X;X;X;X;X;X	XXXXXXXPPPPPPPPPPPPPPPPPPPXXXXX	FFESFGDLS(0.5)S(0.5)PDAVMGNPK	9	4	-0.5788				5301	0	0	0	0	0	0
sp|P02042|HBD_HUMAN	51	sp|P02042|HBD_HUMAN	sp|P02042|HBD_HUMAN	>sp|P02042|HBD_HUMAN Hemoglobin subunit delta OS=Homo sapiens OX=9606 GN=HBD PE=1 SV=2	0.499771	2.92e-05	53.489		S	YPWTQRFFESFGDLSSPDAVMGNPKVKAHGK	X;X;X;X;X;X;X;X;X;X;X;X;X;X;X;X;X;X;X;X;X;X;X;X;X;X;X;X;X;X;X	XXXXXXXXXXXXXXXXXXXXXXXXXXXXXXX	FFESFGDLS(0.5)S(0.5)PDAVMGNPK	10	4	-0.5788				5301	0	0	0	0	0	0
sp|P02545|LMNA_HUMAN	613	sp|P02545|LMNA_HUMAN	sp|P02545|LMNA_HUMAN	>sp|P02545|LMNA_HUMAN Prelamin-A/C OS=Homo sapiens OX=9606 GN=LMNA PE=1 SV=1	0.829537	3.85e-14	72.551	1	S	ASASGSGAQVGGPISSGSSASSVTVTRSYRS	X;X;X;X;X;X;X;X;X;X;X;X;X;X;X;Phospho (STY);X;X;X;X;X;X;X;X;X;X;X;X;X;X;Phospho (STY)	PPPPPPPPPPPPPPPPPPPPPPPPPPPXXXX	ASASGSGAQVGGPIS(0.033)S(0.83)GS(0.091)S(0.033)AS(0.005)S(0.005)VT(0.002)VT(0.001)R	16	3	0.064591			1695;1698	1698	14153	37946	28538	11950	10823	10307
sp|P02545|LMNA_HUMAN	615	sp|P02545|LMNA_HUMAN	sp|P02545|LMNA_HUMAN	>sp|P02545|LMNA_HUMAN Prelamin-A/C OS=Homo sapiens OX=9606 GN=LMNA PE=1 SV=1	0.470431	1.34e-33	121.67		S	ASGSGAQVGGPISSGSSASSVTVTRSYRSVG	X;X;X;X;X;X;X;X;X;X;X;X;X;X;X;Phospho (STY);X;X;X;X;X;X;X;X;X;X;X;X;Phospho (STY);X;X	PPPPPPPPPPPPPPPPPPPPPPPPPXXXXXX	ASASGSGAQVGGPIS(0.011)S(0.026)GS(0.47)S(0.47)AS(0.018)S(0.004)VTVTR	18	3	0.19963				1699	0	0	0	0	0	0
sp|P02545|LMNA_HUMAN	616	sp|P02545|LMNA_HUMAN	sp|P02545|LMNA_HUMAN	>sp|P02545|LMNA_HUMAN Prelamin-A/C OS=Homo sapiens OX=9606 GN=LMNA PE=1 SV=1	0.678082	1.34e-33	121.67	2	S	SGSGAQVGGPISSGSSASSVTVTRSYRSVGG	X;X;X;X;X;X;X;X;X;X;X;X;X;X;X;Phospho (STY);X;X;Phospho (STY);X;X;X;X;X;X;X;X;Phospho (STY);X;X;X	PPPPPPPPPPPPPPPPPPPPPPPPXXXXXXX	ASASGSGAQVGGPIS(0.017)S(0.049)GS(0.189)S(0.678)AS(0.299)S(0.662)VT(0.093)VT(0.014)R	19	3	-0.15331			1700	1700	6077.6	10584	8362.5	5327.6	4424.7	4717.9
sp|P02545|LMNA_HUMAN	618	sp|P02545|LMNA_HUMAN	sp|P02545|LMNA_HUMAN	>sp|P02545|LMNA_HUMAN Prelamin-A/C OS=Homo sapiens OX=9606 GN=LMNA PE=1 SV=1	0.433274	3.9e-27	103.62		S	SGAQVGGPISSGSSASSVTVTRSYRSVGGSG	X;X;X;X;X;X;X;X;X;X;X;X;X;X;X;Phospho (STY);X;X;X;X;X;X;X;X;X;Phospho (STY);X;X;X;Phospho (STY);X	PPPPPPPPPPPPPPPPPPPPPPXXXXXXXXX	ASASGSGAQVGGPISSGS(0.023)S(0.205)AS(0.433)S(0.302)VT(0.034)VT(0.004)R	21	3	0.12222				1693	0	0	0	0	0	0
sp|P02545|LMNA_HUMAN	619	sp|P02545|LMNA_HUMAN	sp|P02545|LMNA_HUMAN	>sp|P02545|LMNA_HUMAN Prelamin-A/C OS=Homo sapiens OX=9606 GN=LMNA PE=1 SV=1	0.662026	3.57e-20	91.861	2	S	GAQVGGPISSGSSASSVTVTRSYRSVGGSGG	X;X;X;X;X;X;X;X;X;X;X;X;Phospho (STY);X;X;Phospho (STY);X;X;X;X;X;X;X;X;Phospho (STY);X;X;X;Phospho (STY);X;X	PPPPPPPPPPPPPPPPPPPPPXXXXXXXXXX	ASASGSGAQVGGPIS(0.017)S(0.049)GS(0.189)S(0.678)AS(0.299)S(0.662)VT(0.093)VT(0.014)R	22	3	-0.15331			1700	1700	6077.6	10584	8362.5	5327.6	4424.7	4717.9
sp|P02545|LMNA_HUMAN	403	sp|P02545|LMNA_HUMAN	sp|P02545|LMNA_HUMAN	>sp|P02545|LMNA_HUMAN Prelamin-A/C OS=Homo sapiens OX=9606 GN=LMNA PE=1 SV=1	0.938238	1.23e-08	84.178	2;3	S	RLSPSPTSQRSRGRASSHSSQTQGGGSVTKK	X;X;Phospho (STY);X;Phospho (STY);X;X;X;X;X;X;X;X;X;X;Phospho (STY);Phospho (STY);X;Phospho (STY);Phospho (STY);X;X;X;X;X;X;Phospho (STY);X;X;X;X	XXXXXXXXXXXXPPPPPPPPPPPPPPPPPPX	GRAS(0.938)S(0.945)HS(0.609)S(0.459)QT(0.048)QGGGSVTK	4	3	0.4892			6833;6835;6837;6838	6837	18665	34970	31375	10135	9660.4	11133
sp|P02545|LMNA_HUMAN	404	sp|P02545|LMNA_HUMAN	sp|P02545|LMNA_HUMAN	>sp|P02545|LMNA_HUMAN Prelamin-A/C OS=Homo sapiens OX=9606 GN=LMNA PE=1 SV=1	0.992137	7.37e-50	177.91	1;2;3	S	LSPSPTSQRSRGRASSHSSQTQGGGSVTKKR	X;Phospho (STY);X;Phospho (STY);X;X;X;X;X;X;X;X;X;X;Phospho (STY);Phospho (STY);X;Phospho (STY);Phospho (STY);X;X;X;X;X;X;Phospho (STY);X;X;X;X;X	XXXXXXXXXXXPPPPPPPPPPPPPPPPPPXX	AS(0.004)S(0.992)HS(0.004)SQTQGGGSVTK	3	2	0.53233			1911;1920;1923;1924;1927;1932;1933;1934;1935;6834;6836;6837;6838	1920	70531	181500	184220	50474	55082	67944
sp|P02545|LMNA_HUMAN	406	sp|P02545|LMNA_HUMAN	sp|P02545|LMNA_HUMAN	>sp|P02545|LMNA_HUMAN Prelamin-A/C OS=Homo sapiens OX=9606 GN=LMNA PE=1 SV=1	0.850285	2.34e-34	157.7	1;2;3	S	PSPTSQRSRGRASSHSSQTQGGGSVTKKRKL	X;Phospho (STY);X;X;X;X;X;X;X;X;X;X;Phospho (STY);Phospho (STY);X;Phospho (STY);Phospho (STY);X;X;X;X;X;X;X;X;X;X;X;X;X;X	XXXXXXXXXPPPPPPPPPPPPPPPPPPXXXX	AS(0.004)S(0.02)HS(0.85)S(0.126)QTQGGGSVTK	5	3	0.014102			1914;1915;1918;1919;1921;1931;1935;1936;1937;6833;6834;6835;6837	1914	74499	147230	145510	48229	45893	57787
sp|P02545|LMNA_HUMAN	407	sp|P02545|LMNA_HUMAN	sp|P02545|LMNA_HUMAN	>sp|P02545|LMNA_HUMAN Prelamin-A/C OS=Homo sapiens OX=9606 GN=LMNA PE=1 SV=1	0.969679	3.02e-30	151.53	1;2;3	S	SPTSQRSRGRASSHSSQTQGGGSVTKKRKLE	Phospho (STY);X;X;X;X;X;X;X;X;X;X;Phospho (STY);Phospho (STY);X;Phospho (STY);Phospho (STY);X;X;X;X;X;X;Phospho (STY);X;X;X;X;X;X;X;X	XXXXXXXXPPPPPPPPPPPPPPPPPPXXXXX	AS(0.043)S(0.277)HS(0.71)S(0.97)QTQGGGSVTK	6	2	-1.9468			1908;1909;1910;1923;1924;1925;1926;1928;1929;1930;1931;1932;1933;1934;1935;1936;1937;1938;6836;6838	1931	128000	283280	273850	95312	92284	102340
sp|P02545|LMNA_HUMAN	414	sp|P02545|LMNA_HUMAN	sp|P02545|LMNA_HUMAN	>sp|P02545|LMNA_HUMAN Prelamin-A/C OS=Homo sapiens OX=9606 GN=LMNA PE=1 SV=1	0.971452	9.53e-15	109.36	1;2;3	S	RGRASSHSSQTQGGGSVTKKRKLESTESRSS	X;X;X;X;Phospho (STY);Phospho (STY);X;X;Phospho (STY);X;X;X;X;X;X;Phospho (STY);X;X;X;X;X;X;X;X;Phospho (STY);Phospho (STY);X;Phospho (STY);X;X;X	XXXPPPPPPPPPPPPPPPPXXXXXXXXXXXX	ASSHSSQTQGGGS(0.971)VT(0.028)K	13	3	0.082108			1907;1912;1917;1922;1927;1938	1912	45893	91588	86789	34739	31968	31780
sp|P02545|LMNA_HUMAN	301	sp|P02545|LMNA_HUMAN	sp|P02545|LMNA_HUMAN	>sp|P02545|LMNA_HUMAN Prelamin-A/C OS=Homo sapiens OX=9606 GN=LMNA PE=1 SV=1	0.970082	3.36e-15	129.33	1	S	GAAHEELQQSRIRIDSLSAQLSQLQKQLAAK	X;X;X;X;X;X;X;X;X;X;X;X;X;X;X;Phospho (STY);X;X;X;X;X;X;X;X;X;X;X;X;X;X;X	XXXXXXXXXXXXXPPPPPPPPPPPPPXXXXX	IDS(0.97)LS(0.03)AQLSQLQK	3	3	-0.24463			7812;7813	7812	20386	27298	28415	16702	14948	14318
sp|P02545|LMNA_HUMAN	423	sp|P02545|LMNA_HUMAN	sp|P02545|LMNA_HUMAN	>sp|P02545|LMNA_HUMAN Prelamin-A/C OS=Homo sapiens OX=9606 GN=LMNA PE=1 SV=1	0.967713	0.000758649	36.129	1;2	S	QTQGGGSVTKKRKLESTESRSSFSQHARTSG	X;X;X;X;X;X;Phospho (STY);X;X;X;X;X;X;X;X;Phospho (STY);X;X;Phospho (STY);X;X;X;X;X;X;X;X;X;X;X;X	XXXXXXXXXXXXPPPPPPPPXXXXXXXXXXX	KLES(0.968)T(0.032)ES(0.001)R	4	2	-0.39866			9222;9224;9225;9227;9228;9231;9232;9234	9227	36188	128560	127070	28904	46765	45656
sp|P02545|LMNA_HUMAN	426	sp|P02545|LMNA_HUMAN	sp|P02545|LMNA_HUMAN	>sp|P02545|LMNA_HUMAN Prelamin-A/C OS=Homo sapiens OX=9606 GN=LMNA PE=1 SV=1	0.998418	0.00209823	27.926	1;2	S	GGGSVTKKRKLESTESRSSFSQHARTSGRVA	X;X;X;Phospho (STY);X;X;X;X;X;X;X;X;Phospho (STY);Phospho (STY);X;Phospho (STY);X;X;X;X;X;X;X;X;X;X;X;X;X;X;X	XXXXXXXXXPPPPPPPPXXXXXXXXXXXXXX	KLES(0.834)T(0.167)ES(0.998)R	7	3	-0.60302			9226;9231;9232;9233;9234;10344;10345	9231	49507	129170	136790	37619	53470	50140
sp|P02545|LMNA_HUMAN	277	sp|P02545|LMNA_HUMAN	sp|P02545|LMNA_HUMAN	>sp|P02545|LMNA_HUMAN Prelamin-A/C OS=Homo sapiens OX=9606 GN=LMNA PE=1 SV=1	1	0.000128127	70.92	1	S	ELEKTYSAKLDNARQSAERNSNLVGAAHEEL	X;X;X;X;X;X;X;X;X;X;X;X;X;X;X;Phospho (STY);X;X;X;X;X;X;X;X;X;X;X;X;X;X;X	XXXXXXXXXPPPPPPPPPPXXXXXXXXXXXX	LDNARQS(1)AER	7	3	-0.38085			10172;10173;10174;10175;10176;10177	10177	27364	41218	60232	19306	16741	16548
sp|P02545|LMNA_HUMAN	390	sp|P02545|LMNA_HUMAN	sp|P02545|LMNA_HUMAN	>sp|P02545|LMNA_HUMAN Prelamin-A/C OS=Homo sapiens OX=9606 GN=LMNA PE=1 SV=1	0.999739	6.2e-08	98.959	1;2	S	AYRKLLEGEEERLRLSPSPTSQRSRGRASSH	X;X;X;X;X;X;X;X;X;X;X;X;X;X;X;Phospho (STY);X;Phospho (STY);X;X;X;X;X;X;X;X;X;X;Phospho (STY);Phospho (STY);X	XXXXXXXXXXXXPPPPPPPPPPPXXXXXXXX	LRLS(1)PS(0.992)PT(0.008)SQR	4	3	0.17541			10989;10990;10991;10992;10993;10994;10995;10996;10997;10998;10999;11000;11001;11002;11003;11004;11005;11006;11007;11111;11115;11118;11119	11006	186110	266390	323420	133490	120900	121170
sp|P02545|LMNA_HUMAN	392	sp|P02545|LMNA_HUMAN	sp|P02545|LMNA_HUMAN	>sp|P02545|LMNA_HUMAN Prelamin-A/C OS=Homo sapiens OX=9606 GN=LMNA PE=1 SV=1	0.999955	2.1e-06	111.51	1;2	S	RKLLEGEEERLRLSPSPTSQRSRGRASSHSS	X;X;X;X;X;X;X;X;X;X;X;X;X;Phospho (STY);X;Phospho (STY);X;X;X;X;X;X;X;X;X;X;Phospho (STY);Phospho (STY);X;Phospho (STY);Phospho (STY)	XXXXXXXXXXPPPPPPPPPPPXXXXXXXXXX	LSPS(1)PTSQR	4	3	-0.26191			10998;10999;11000;11001;11002;11003;11004;11005;11006;11007;11108;11109;11110;11112;11113;11114;11116;11117;11119	11110	149060	224440	295860	104690	91404	94098
sp|P02545|LMNA_HUMAN	458	sp|P02545|LMNA_HUMAN	sp|P02545|LMNA_HUMAN	>sp|P02545|LMNA_HUMAN Prelamin-A/C OS=Homo sapiens OX=9606 GN=LMNA PE=1 SV=1	0.999684	5.02e-15	110.9	1	S	EEVDEEGKFVRLRNKSNEDQSMGNWQIKRQN	X;X;X;X;X;X;X;X;X;X;X;X;X;X;X;Phospho (STY);X;X;X;X;X;X;X;X;X;X;X;X;X;X;X	XXXXXXXXXXXXXPPPPPPPPPPPPPPPXXX	NKS(1)NEDQSMGNWQIK	3	3	-0.03672			11799;11800;11801	11799	70154	137950	158040	54552	54298	50855
sp|P02545|LMNA_HUMAN	22	sp|P02545|LMNA_HUMAN	sp|P02545|LMNA_HUMAN	>sp|P02545|LMNA_HUMAN Prelamin-A/C OS=Homo sapiens OX=9606 GN=LMNA PE=1 SV=1	0.955078	4.15e-09	87.825	1	S	RRATRSGAQASSTPLSPTRITRLQEKEDLQE	X;X;X;X;X;X;X;X;X;X;X;X;X;X;X;Phospho (STY);X;X;X;X;X;X;X;X;X;X;X;X;X;X;X	XXXXXPPPPPPPPPPPPPPXXXXXXXXXXXX	SGAQASST(0.001)PLS(0.955)PT(0.044)R	11	3	-0.015472			15371;15372	15372	14499	22266	27280	11092	9624.1	13376
sp|P02545|LMNA_HUMAN	628	sp|P02545|LMNA_HUMAN	sp|P02545|LMNA_HUMAN	>sp|P02545|LMNA_HUMAN Prelamin-A/C OS=Homo sapiens OX=9606 GN=LMNA PE=1 SV=1	0.990207	4.54e-07	68.253	1	S	SGSSASSVTVTRSYRSVGGSGGGSFGDNLVT	Phospho (STY);X;Phospho (STY);Phospho (STY);X;Phospho (STY);Phospho (STY);X;X;X;X;X;X;X;X;Phospho (STY);X;X;X;X;X;X;X;X;X;X;X;X;X;X;X	XXXXXXXXXXXXXXXPPPPPPPPPPPPPPPP	S(0.99)VGGS(0.01)GGGSFGDNLVTR	1	3	-0.53445			17774;17776	17774	19722	28798	23817	16870	15559	15618
sp|P02545|LMNA_HUMAN	632	sp|P02545|LMNA_HUMAN	sp|P02545|LMNA_HUMAN	>sp|P02545|LMNA_HUMAN Prelamin-A/C OS=Homo sapiens OX=9606 GN=LMNA PE=1 SV=1	0.999357	5.81e-14	103.07	1	S	ASSVTVTRSYRSVGGSGGGSFGDNLVTRSYL	X;Phospho (STY);Phospho (STY);X;X;X;X;X;X;X;X;X;X;X;X;Phospho (STY);X;X;X;X;X;X;X;X;X;X;X;X;X;X;X	XXXXXXXXXXXPPPPPPPPPPPPPPPPPXXX	SVGGS(0.999)GGGSFGDNLVTR	5	2	0.56631			17771;17775;17777;17778	17777	42846	60653	55160	35704	33219	37978
sp|P02545|LMNA_HUMAN	636	sp|P02545|LMNA_HUMAN	sp|P02545|LMNA_HUMAN	>sp|P02545|LMNA_HUMAN Prelamin-A/C OS=Homo sapiens OX=9606 GN=LMNA PE=1 SV=1	1	2.72e-75	151.12	1	S	TVTRSYRSVGGSGGGSFGDNLVTRSYLLGNS	X;X;X;X;X;X;X;X;X;X;X;X;X;X;X;Phospho (STY);X;X;X;X;X;X;X;X;X;X;X;X;X;X;X	XXXXXXXPPPPPPPPPPPPPPPPPXXXXXXX	SVGGSGGGS(1)FGDNLVTR	9	3	-0.96627			17772;17773;17779	17772	36782	63248	55111	27581	29943	27961
sp|P02545|LMNA_HUMAN	652	sp|P02545|LMNA_HUMAN	sp|P02545|LMNA_HUMAN	>sp|P02545|LMNA_HUMAN Prelamin-A/C OS=Homo sapiens OX=9606 GN=LMNA PE=1 SV=1	0.954325	0.00124471	72.929	1	S	FGDNLVTRSYLLGNSSPRTQSPQNCSIM___	X;X;X;X;X;X;X;X;X;X;X;X;X;X;X;Phospho (STY);X;X;X;X;X;X;X;X;X;X;X;X;X;X;X	XXXXXXXXPPPPPPPPPPXXXXXXXXXXXXX	SYLLGNS(0.046)S(0.954)PR	8	2	-0.6158			17889	17889	21175	26609	35979	13682	13214	13686
sp|P02545|LMNA_HUMAN	533	sp|P02545|LMNA_HUMAN	sp|P02545|LMNA_HUMAN	>sp|P02545|LMNA_HUMAN Prelamin-A/C OS=Homo sapiens OX=9606 GN=LMNA PE=1 SV=1	0.979883	2.17e-05	56	1	S	NTWGCGNSLRTALINSTGEEVAMRKLVRSVT	X;X;X;X;X;X;X;X;X;X;X;X;X;X;X;Phospho (STY);X;X;X;X;X;X;X;X;X;X;X;X;X;X;X	XXXXXXXXXXPPPPPPPPPPPPPPXXXXXXX	TALINS(0.98)T(0.02)GEEVAMR	6	3	0.26112			17977;17978;17979;17980	17980	31025	46738	41966	27411	23844	22883
sp|P02549|SPTA1_HUMAN	1284	sp|P02549|SPTA1_HUMAN	sp|P02549|SPTA1_HUMAN	>sp|P02549|SPTA1_HUMAN Spectrin alpha chain, erythrocytic 1 OS=Homo sapiens OX=9606 GN=SPTA1 PE=1 SV=5	1	0.00029707	61.188	1	S	EAWEDLQGRTKDRKESLNEAQKFYLFLSKAR	X;X;X;X;X;X;X;X;X;X;X;X;X;X;X;Phospho (STY);X;X;X;X;X;X;X;X;X;X;X;X;X;X;X	XXXXXXXXXXXXXPPPPPPPPPXXXXXXXXX	KES(1)LNEAQK	3	3	0.26672			8825	8825	23760	29785	25987	29182	26541	21456
sp|P02671|FIBA_HUMAN	485	sp|P02671|FIBA_HUMAN	sp|P02671|FIBA_HUMAN	>sp|P02671|FIBA_HUMAN Fibrinogen alpha chain OS=Homo sapiens OX=9606 GN=FGA PE=1 SV=2	0.851094	3.83e-63	180.06	1	S	IGPDGHKEVTKEVVTSEDGSDCPEAMDLGTL	X;X;X;X;X;X;X;X;X;X;X;X;X;X;X;Phospho (STY);X;X;X;X;X;X;X;X;X;Oxidation (M);X;X;X;X;X	XXXXXXXXXXXPPPPPPPPPPPPPPPPPPPP	EVVT(0.149)S(0.851)EDGSDCPEAMDLGTLSGIGTLDGFR	5	3	0.64873			5216;5217;5218;5219;5220;5221;5222;5223;5224	5224	32019	40127	33046	29417	29640	29184
sp|P02671|FIBA_HUMAN	274	sp|P02671|FIBA_HUMAN	sp|P02671|FIBA_HUMAN	>sp|P02671|FIBA_HUMAN Fibrinogen alpha chain OS=Homo sapiens OX=9606 GN=FGA PE=1 SV=2	0.685457	7.22e-19	112.9	1	S	MELERPGGNEITRGGSTSYGTGSETESPRNP	X;X;X;X;X;X;X;X;X;X;X;X;X;X;X;Phospho (STY);X;X;X;X;X;X;X;X;X;X;X;X;X;X;X	XXXXXXXXXXXXXPPPPPPPPPPPPPPPPXX	GGS(0.685)T(0.273)S(0.037)YGT(0.005)GSETESPR	3	2	-0.50703			6120	6120	4182.5	11832	10227	3527.3	5025.3	5021.6
sp|P02671|FIBA_HUMAN	524	sp|P02671|FIBA_HUMAN	sp|P02671|FIBA_HUMAN	>sp|P02671|FIBA_HUMAN Fibrinogen alpha chain OS=Homo sapiens OX=9606 GN=FGA PE=1 SV=2	0.821581	2.18e-06	74.612	1	S	FRHRHPDEAAFFDTASTGKTFPGFFSPMLGE	X;X;X;X;X;X;X;X;X;X;X;X;X;X;X;Phospho (STY);X;X;X;X;X;X;X;X;X;X;X;X;X;X;X	XXXXPPPPPPPPPPPPPPPXXXXXXXXXXXX	HPDEAAFFDT(0.028)AS(0.822)T(0.151)GK	12	3	0.16615			7582	7582	14452	17382	14694	12868	10961	14959
sp|P02671|FIBA_HUMAN	364	sp|P02671|FIBA_HUMAN	sp|P02671|FIBA_HUMAN	>sp|P02671|FIBA_HUMAN Fibrinogen alpha chain OS=Homo sapiens OX=9606 GN=FGA PE=1 SV=2	0.884547	2.38e-06	83.046	1	S	PGSPRPGSTGTWNPGSSERGSAGHWTSESSV	X;X;X;X;X;X;X;X;X;X;X;X;X;X;X;Phospho (STY);X;X;X;X;X;X;X;X;X;X;X;X;X;X;X	XXXXXPPPPPPPPPPPPPPXXXXXXXXXXXX	PGSTGTWNPGS(0.885)S(0.115)ER	11	2	-1.1602			12081;12082;12083;12084;12085	12083	59426	79633	66326	54178	53944	58167
sp|P02671|FIBA_HUMAN	365	sp|P02671|FIBA_HUMAN	sp|P02671|FIBA_HUMAN	>sp|P02671|FIBA_HUMAN Fibrinogen alpha chain OS=Homo sapiens OX=9606 GN=FGA PE=1 SV=2	0.658364	8.13e-11	103.06	1	S	GSPRPGSTGTWNPGSSERGSAGHWTSESSVS	X;X;X;X;X;X;X;X;X;X;X;X;X;X;X;Phospho (STY);X;X;X;X;X;X;X;X;X;X;X;X;X;X;X	XXXXPPPPPPPPPPPPPPXXXXXXXXXXXXX	PGSTGTWNPGS(0.342)S(0.658)ER	12	2	0.73105			12080	12080	8224.2	9266.1	6192.4	8245.6	9283.8	9693.4
sp|P02686|MBP_HUMAN	16	sp|P02686|MBP_HUMAN	sp|P02686|MBP_HUMAN	>sp|P02686|MBP_HUMAN Myelin basic protein OS=Homo sapiens OX=9606 GN=MBP PE=1 SV=3	0.916764	3.49e-05	51.211	2	S	MGNHAGKRELNAEKASTNSETNRGESEKKRN	X;X;X;X;X;X;X;X;X;X;X;X;X;X;X;Phospho (STY);X;X;Phospho (STY);X;X;X;X;X;X;X;X;X;X;X;X	XXXXXXXXPPPPPPPPPPPPPPPPPPPPXXX	ELNAEKAS(0.917)T(0.164)NS(0.91)ET(0.008)NRGESEK	8	4	0.15203			4348;4349	4349	16297	27430	28430	13608	14430	16285
sp|P02686|MBP_HUMAN	19	sp|P02686|MBP_HUMAN	sp|P02686|MBP_HUMAN	>sp|P02686|MBP_HUMAN Myelin basic protein OS=Homo sapiens OX=9606 GN=MBP PE=1 SV=3	0.910427	3.49e-05	51.211	2	S	HAGKRELNAEKASTNSETNRGESEKKRNLGE	X;X;X;X;X;X;X;X;X;X;X;X;Phospho (STY);X;X;Phospho (STY);X;X;X;X;X;X;X;X;X;X;X;X;X;X;X	XXXXXPPPPPPPPPPPPPPPPPPPPXXXXXX	ELNAEKAS(0.917)T(0.164)NS(0.91)ET(0.008)NRGESEK	11	4	0.15203			4348;4349	4349	16297	27430	28430	13608	14430	16285
sp|P02686|MBP_HUMAN	26	sp|P02686|MBP_HUMAN	sp|P02686|MBP_HUMAN	>sp|P02686|MBP_HUMAN Myelin basic protein OS=Homo sapiens OX=9606 GN=MBP PE=1 SV=3	0.999423	4.48e-06	64.387	1	S	NAEKASTNSETNRGESEKKRNLGELSRTTSE	X;X;X;X;X;X;X;X;X;X;X;X;X;X;X;Phospho (STY);X;X;X;X;X;X;X;X;X;X;X;X;X;X;X	XXXXPPPPPPPPPPPPPPXXXXXXXXXXXXX	ASTNSET(0.001)NRGES(0.999)EK	12	3	-0.49231			1996;1997;1998	1996	13539	31621	41048	10158	13040	12120
sp|P02686|MBP_HUMAN	112	sp|P02686|MBP_HUMAN	sp|P02686|MBP_HUMAN	>sp|P02686|MBP_HUMAN Myelin basic protein OS=Homo sapiens OX=9606 GN=MBP PE=1 SV=3	0.737589	6.33e-29	116.72	1	S	RDAPGREDNTFKDRPSESDELQTIQEDSAAT	X;X;X;X;X;X;X;X;X;X;X;X;X;X;X;Phospho (STY);X;X;X;X;X;X;X;X;X;X;X;X;X;X;X	XXXXXXXXXXXXPPPPPPPPPPPPPPPPPPP	DRPS(0.738)ES(0.262)DELQTIQEDSAATSESLDVMASQK	4	4	0.25915			3073;3075	3075	13808	22665	20964	11596	13287	11938
sp|P02686|MBP_HUMAN	114	sp|P02686|MBP_HUMAN	sp|P02686|MBP_HUMAN	>sp|P02686|MBP_HUMAN Myelin basic protein OS=Homo sapiens OX=9606 GN=MBP PE=1 SV=3	0.617916	8.98e-15	74.402	1	S	APGREDNTFKDRPSESDELQTIQEDSAATSE	X;X;X;X;X;X;X;X;X;X;X;X;X;X;X;Phospho (STY);X;X;X;X;X;X;X;X;X;X;X;X;X;X;X	XXXXXXXXXXPPPPPPPPPPPPPPPPPPPPP	DRPS(0.382)ES(0.618)DELQTIQEDSAATSESLDVMASQK	6	5	-0.10273			3072;3074;3076;3077	3074	23887	41321	31623	19738	19516	18167
sp|P02724|GLPA_HUMAN	138	sp|P02724|GLPA_HUMAN	sp|P02724|GLPA_HUMAN	>sp|P02724|GLPA_HUMAN Glycophorin-A OS=Homo sapiens OX=9606 GN=GYPA PE=1 SV=2	0.496559	1.8e-10	72.102		S	SDVKPLPSPDTDVPLSSVEIENPETSDQ___	X;X;X;X;X;X;X;X;X;X;X;X;X;X;X;Phospho (STY);X;X;X;X;X;X;X;X;X;X;X;X;X;X;X	PPPPPPPPPPPPPPPPPPPPPPPPPPPPXXX	SPSDVKPLPSPDTDVPLS(0.497)S(0.497)VEIENPET(0.003)S(0.004)DQ	18	4	0.52591				16513	0	0	0	0	0	0
sp|P02724|GLPA_HUMAN	139	sp|P02724|GLPA_HUMAN	sp|P02724|GLPA_HUMAN	>sp|P02724|GLPA_HUMAN Glycophorin-A OS=Homo sapiens OX=9606 GN=GYPA PE=1 SV=2	0.496559	1.8e-10	72.102		S	DVKPLPSPDTDVPLSSVEIENPETSDQ____	X;X;X;X;X;X;X;X;X;X;X;X;X;X;X;X;X;X;X;X;X;X;X;X;X;X;X;X;X;X;X	XXXXXXXXXXXXXXXXXXXXXXXXXXXXXXX	SPSDVKPLPSPDTDVPLS(0.497)S(0.497)VEIENPET(0.003)S(0.004)DQ	19	4	0.52591				16513	0	0	0	0	0	0
sp|P02730|B3AT_HUMAN	349	sp|P02730|B3AT_HUMAN	sp|P02730|B3AT_HUMAN	>sp|P02730|B3AT_HUMAN Band 3 anion transport protein OS=Homo sapiens OX=9606 GN=SLC4A1 PE=1 SV=3	0.585431	0.00029323	51.594	1	S	SLVPVQRELLRRRYQSSPAKPDSSFYKGLDL	X;X;X;X;X;X;X;X;X;X;X;X;X;X;X;Phospho (STY);X;X;X;X;X;X;X;X;X;X;X;X;X;X;X	XXXXXXXXXXXXXPPPPPPPPPPPPPPXXXX	Y(0.001)QS(0.585)S(0.411)PAKPDS(0.002)S(0.001)FYK	3	4	0.041931			20693;20696	20693	24289	31380	21511	24735	23853	19486
sp|P02730|B3AT_HUMAN	350	sp|P02730|B3AT_HUMAN	sp|P02730|B3AT_HUMAN	>sp|P02730|B3AT_HUMAN Band 3 anion transport protein OS=Homo sapiens OX=9606 GN=SLC4A1 PE=1 SV=3	0.959323	6.92e-09	86.734	1	S	LVPVQRELLRRRYQSSPAKPDSSFYKGLDLN	X;X;X;X;X;X;X;X;X;X;X;X;X;X;X;Phospho (STY);X;X;X;X;X;X;X;X;X;X;X;X;X;X;X	XXXXXXXXXXXXPPPPPPPPPPPPPPXXXXX	YQS(0.04)S(0.959)PAKPDSSFYK	4	3	0.63551			20689;20695	20695	39599	50658	38529	52760	49862	39875
sp|P02730|B3AT_HUMAN	356	sp|P02730|B3AT_HUMAN	sp|P02730|B3AT_HUMAN	>sp|P02730|B3AT_HUMAN Band 3 anion transport protein OS=Homo sapiens OX=9606 GN=SLC4A1 PE=1 SV=3	0.939895	5.7e-10	102.39	1	S	ELLRRRYQSSPAKPDSSFYKGLDLNGGPDDP	X;X;X;X;X;X;X;X;X;X;X;X;X;X;X;Phospho (STY);X;X;X;X;X;X;X;X;X;X;X;X;X;X;X	XXXXXXPPPPPPPPPPPPPPXXXXXXXXXXX	YQSS(0.003)PAKPDS(0.94)S(0.057)FYK	10	3	-0.21239			20690;20694	20694	55822	36861	45169	39140	70392	63304
sp|P02730|B3AT_HUMAN	357	sp|P02730|B3AT_HUMAN	sp|P02730|B3AT_HUMAN	>sp|P02730|B3AT_HUMAN Band 3 anion transport protein OS=Homo sapiens OX=9606 GN=SLC4A1 PE=1 SV=3	0.822235	3.02e-06	76.416	1	S	LLRRRYQSSPAKPDSSFYKGLDLNGGPDDPL	X;X;X;X;X;X;X;X;X;X;X;X;X;X;X;Phospho (STY);X;X;X;X;X;X;X;X;X;X;X;X;X;X;X	XXXXXPPPPPPPPPPPPPPXXXXXXXXXXXX	YQSSPAKPDS(0.178)S(0.822)FYK	11	4	-1.2649			20688;20691	20691	33099	21156	29892	21291	36584	30941
sp|P02751|FINC_HUMAN	2475	sp|P02751|FINC_HUMAN	sp|P02751|FINC_HUMAN	>sp|P02751|FINC_HUMAN Fibronectin OS=Homo sapiens OX=9606 GN=FN1 PE=1 SV=5	1	6.98e-70	191.41	1	S	IECFMPLDVQADREDSRE_____________	X;X;X;X;Oxidation (M);X;X;X;X;X;X;X;X;X;X;Phospho (STY);X;X;X;X;X;X;X;X;X;X;X;X;X;X;X	PPPPPPPPPPPPPPPPPPXXXXXXXXXXXXX	TNTNVNCPIECFMPLDVQADREDS(1)RE	24	3	0.084644			18595;18596;18597;18598;18599;18600;18601;18602;18603;18604;18605	18605	107650	112600	80975	93445	89012	90104
sp|P02794|FRIH_HUMAN	179	sp|P02794|FRIH_HUMAN	sp|P02794|FRIH_HUMAN	>sp|P02794|FRIH_HUMAN Ferritin heavy chain OS=Homo sapiens OX=9606 GN=FTH1 PE=1 SV=2	0.999819	3.1e-13	89.653	1	S	SGLAEYLFDKHTLGDSDNES___________	X;X;X;X;X;X;X;X;X;X;X;X;X;X;X;Phospho (STY);X;X;X;X;X;X;X;X;X;X;X;X;X;X;X	PPPPPPPPPPPPPPPPPPPPXXXXXXXXXXX	HTLGDS(1)DNES	6	2	0.12662			7661;7662;7663;9340;11405	7663	21205	39032	40182	15845	22438	22633
sp|P02794|FRIH_HUMAN	183	sp|P02794|FRIH_HUMAN	sp|P02794|FRIH_HUMAN	>sp|P02794|FRIH_HUMAN Ferritin heavy chain OS=Homo sapiens OX=9606 GN=FTH1 PE=1 SV=2	0.454597	0.000188147	42.977		S	EYLFDKHTLGDSDNES_______________	X;X;X;X;X;X;X;X;X;X;X;X;X;X;X;Phospho (STY);X;X;X;X;X;X;X;X;X;X;X;X;X;X;X	PPPPPPPPPPPPPPPPXXXXXXXXXXXXXXX	MGAPESGLAEY(0.004)LFDKHT(0.132)LGDS(0.409)DNES(0.455)	25	4	-0.64558				11406	0	0	0	0	0	0
sp|P04049|RAF1_HUMAN	43	sp|P04049|RAF1_HUMAN	sp|P04049|RAF1_HUMAN	>sp|P04049|RAF1_HUMAN RAF proto-oncogene serine/threonine-protein kinase OS=Homo sapiens OX=9606 GN=RAF1 PE=1 SV=1	1	1.03e-05	74.88	1	S	ISPTIVQQFGYQRRASDDGKLTDPSKTSNTI	X;X;X;X;X;X;X;X;X;X;X;X;X;X;X;Phospho (STY);X;X;X;X;X;X;X;X;X;X;X;X;X;X;X	XXXXXXXXXXXXXPPPPPPPPPPPPPXXXXX	RAS(1)DDGK	3	2	1.2104			13034;13035;13036;13037;13038;13039;13040;13041	13039	83432	115530	104780	54384	46839	49850
sp|P04049|RAF1_HUMAN;sp|P10398|ARAF_HUMAN	621;582	sp|P04049|RAF1_HUMAN	sp|P04049|RAF1_HUMAN	>sp|P04049|RAF1_HUMAN RAF proto-oncogene serine/threonine-protein kinase OS=Homo sapiens OX=9606 GN=RAF1 PE=1 SV=1;>sp|P10398|ARAF_HUMAN Serine/threonine-protein kinase A-Raf OS=Homo sapiens OX=9606 GN=ARAF PE=1 SV=2	0.973873	0.000417667	93.047	1	S	IELLQHSLPKINRSASEPSLHRAAHTEDINA	X;X;X;X;X;X;X;X;X;X;X;X;X;X;X;Phospho (STY);X;X;X;X;X;X;X;X;X;X;X;X;X;X;X	XXXXXXXXXXXXXPPPPPPPPPXXXXXXXXX	S(0.025)AS(0.974)EPS(0.001)LHR	3	3	0.70343			14810;14811;14812;14813;14815	14812	35512	53547	42508	26959	23093	26934
sp|P04049|RAF1_HUMAN;sp|P10398|ARAF_HUMAN	624;585	sp|P04049|RAF1_HUMAN	sp|P04049|RAF1_HUMAN	>sp|P04049|RAF1_HUMAN RAF proto-oncogene serine/threonine-protein kinase OS=Homo sapiens OX=9606 GN=RAF1 PE=1 SV=1;>sp|P10398|ARAF_HUMAN Serine/threonine-protein kinase A-Raf OS=Homo sapiens OX=9606 GN=ARAF PE=1 SV=2	0.625024	0.0013646	83.545	1	S	LQHSLPKINRSASEPSLHRAAHTEDINACTL	X;X;X;X;X;X;X;X;X;X;X;X;X;X;X;Phospho (STY);X;X;X;X;X;X;X;X;X;X;X;X;X;X;X	XXXXXXXXXXPPPPPPPPPXXXXXXXXXXXX	S(0.001)AS(0.374)EPS(0.625)LHR	6	2	-0.12485			14814	14814	8462.5	11056	10035	5425.9	4877.8	4512.1
sp|P04049|RAF1_HUMAN	257	sp|P04049|RAF1_HUMAN	sp|P04049|RAF1_HUMAN	>sp|P04049|RAF1_HUMAN RAF proto-oncogene serine/threonine-protein kinase OS=Homo sapiens OX=9606 GN=RAF1 PE=1 SV=1	0.328756	3.64e-10	81.358		S	TSSPSSEGSLSQRQRSTSTPNVHMVSTTLPV	X;X;X;X;X;X;X;X;X;X;X;X;X;X;X;Phospho (STY);X;X;X;X;X;X;X;X;X;X;X;X;X;X;X	XXXXXXXXXXXXXXXPPPPPPPPPPPPPPPP	S(0.329)T(0.329)S(0.271)T(0.072)PNVHMVSTTLPVDSR	1	3	-0.050411				17714	0	0	0	0	0	0
sp|P04075|ALDOA_HUMAN	36	sp|P04075|ALDOA_HUMAN	sp|P04075|ALDOA_HUMAN	>sp|P04075|ALDOA_HUMAN Fructose-bisphosphate aldolase A OS=Homo sapiens OX=9606 GN=ALDOA PE=1 SV=2	0.982626	5.88e-19	133.38	1	S	HRIVAPGKGILAADESTGSIAKRLQSIGTEN	X;X;X;X;X;X;X;X;X;X;X;X;X;X;X;Phospho (STY);X;X;X;X;X;X;X;X;X;X;X;X;X;X;X	XXXXXXXXPPPPPPPPPPPPPPXXXXXXXXX	GILAADES(0.983)T(0.017)GSIAK	8	2	-0.74788			6182;6183;6186;6187;6190	6187	102530	122270	134120	86622	77025	70189
sp|P04075|ALDOA_HUMAN	39	sp|P04075|ALDOA_HUMAN	sp|P04075|ALDOA_HUMAN	>sp|P04075|ALDOA_HUMAN Fructose-bisphosphate aldolase A OS=Homo sapiens OX=9606 GN=ALDOA PE=1 SV=2	0.997113	1.5e-33	164.75	1	S	VAPGKGILAADESTGSIAKRLQSIGTENTEE	X;X;X;X;X;X;X;X;X;X;X;X;X;X;X;Phospho (STY);X;X;X;X;X;X;X;X;X;X;X;X;X;X;X	XXXXXPPPPPPPPPPPPPPPXXXXXXXXXXX	GILAADEST(0.003)GS(0.997)IAKR	11	3	0.64582			6180;6181;6184;6185;6191;6192	6191	149550	173140	190650	124220	112050	101270
sp|P04114|APOB_HUMAN	4048	sp|P04114|APOB_HUMAN	sp|P04114|APOB_HUMAN	>sp|P04114|APOB_HUMAN Apolipoprotein B-100 OS=Homo sapiens OX=9606 GN=APOB PE=1 SV=2	0.999976	3.88e-08	98.721	1	S	DKKLTIFKTELRVRESDEETQIKVNWEEEAA	X;X;X;X;X;X;X;X;X;X;X;X;X;X;X;Phospho (STY);X;X;X;X;X;X;X;X;X;X;X;X;X;X;X	XXXXXXXXXXXXPPPPPPPPPPPXXXXXXXX	VRES(1)DEETQIK	4	3	-0.72427			20159;20160;20161;20162;20163	20162	77566	88950	70154	92485	77052	73276
sp|P04150|GCR_HUMAN	134	sp|P04150|GCR_HUMAN	sp|P04150|GCR_HUMAN	>sp|P04150|GCR_HUMAN Glucocorticoid receptor OS=Homo sapiens OX=9606 GN=NR3C1 PE=1 SV=1	0.996237	8.46e-05	94.775	1	S	LKLLEESIANLNRSTSVPENPKSSASTAVSA	X;X;X;X;X;X;X;X;X;X;X;X;X;X;X;Phospho (STY);X;X;X;X;X;X;X;X;X;X;X;X;X;X;X	XXXXXXXXXXXXXPPPPPPPPPXXXXXXXXX	S(0.001)T(0.003)S(0.996)VPENPK	3	2	-0.1382			17718;17719;17720	17719	36652	71114	51903	29729	34699	28000
sp|P04233|HG2A_HUMAN	8	sp|P04233|HG2A_HUMAN	sp|P04233|HG2A_HUMAN	>sp|P04233|HG2A_HUMAN HLA class II histocompatibility antigen gamma chain OS=Homo sapiens OX=9606 GN=CD74 PE=1 SV=3	1	0.00133407	35.436	1	S	________MHRRRSRSCREDQKPVMDDQRDL	X;X;X;X;X;X;X;X;X;X;X;X;X;X;X;Phospho (STY);X;X;X;X;X;X;X;X;X;X;X;X;X;X;X	XXXXXXXXXXXXXXXPPPPPPPPPPPPPPXX	S(1)CREDQKPVMDDQR	1	3	0.62834			14947;14948	14948	12081	42517	25137	9406.6	13023	9493
sp|P04406|G3P_HUMAN	210	sp|P04406|G3P_HUMAN	sp|P04406|G3P_HUMAN	>sp|P04406|G3P_HUMAN Glyceraldehyde-3-phosphate dehydrogenase OS=Homo sapiens OX=9606 GN=GAPDH PE=1 SV=3	0.870515	2.06e-06	77.288	1	S	LWRDGRGALQNIIPASTGAAKAVGKVIPELN	X;X;X;X;X;X;X;X;X;X;X;X;X;X;X;Phospho (STY);X;X;X;X;X;X;X;X;X;X;X;X;X;X;X	XXXXXXPPPPPPPPPPPPPPPXXXXXXXXXX	GALQNIIPAS(0.871)T(0.129)GAAK	10	3	0.11646			5684;5685;5686	5686	27774	35235	36034	25695	22474	21434
sp|P04439|HLAA_HUMAN	356	sp|P04439|HLAA_HUMAN	sp|P04439|HLAA_HUMAN	>sp|P04439|HLAA_HUMAN HLA class I histocompatibility antigen, A alpha chain OS=Homo sapiens OX=9606 GN=HLA-A PE=1 SV=2	0.905736	5.32e-06	41.076	2	S	GGSYTQAASSDSAQGSDVSLTACKV______	X;X;X;X;X;X;X;X;X;X;X;X;X;X;X;Phospho (STY);X;X;Phospho (STY);X;X;X;X;X;X;X;X;X;X;X;X	PPPPPPPPPPPPPPPPPPPPPPPPXXXXXXX	KGGSYTQAAS(0.002)S(0.005)DS(0.019)AQGS(0.906)DVS(0.742)LT(0.326)ACK	17	4	1.4625			9002	9002	6877.9	11598	14171	5346.4	5515.9	8680
sp|P04439|HLAA_HUMAN	359	sp|P04439|HLAA_HUMAN	sp|P04439|HLAA_HUMAN	>sp|P04439|HLAA_HUMAN HLA class I histocompatibility antigen, A alpha chain OS=Homo sapiens OX=9606 GN=HLA-A PE=1 SV=2	0.741681	5.32e-06	41.076	2	S	YTQAASSDSAQGSDVSLTACKV_________	X;X;X;X;X;X;X;X;X;X;X;X;Phospho (STY);X;X;Phospho (STY);X;X;X;X;X;X;X;X;X;X;X;X;X;X;X	PPPPPPPPPPPPPPPPPPPPPXXXXXXXXXX	KGGSYTQAAS(0.002)S(0.005)DS(0.019)AQGS(0.906)DVS(0.742)LT(0.326)ACK	20	4	1.4625			9002	9002	6877.9	11598	14171	5346.4	5515.9	8680
sp|P04626|ERBB2_HUMAN	998	sp|P04626|ERBB2_HUMAN	sp|P04626|ERBB2_HUMAN	>sp|P04626|ERBB2_HUMAN Receptor tyrosine-protein kinase erbB-2 OS=Homo sapiens OX=9606 GN=ERBB2 PE=1 SV=1	0.998598	1.1e-24	120.36	1	S	PQRFVVIQNEDLGPASPLDSTFYRSLLEDDD	X;X;X;X;X;X;X;X;X;X;X;X;X;X;X;Phospho (STY);X;X;X;X;X;X;X;X;X;X;X;X;X;X;X	XXXPPPPPPPPPPPPPPPPPPPPPXXXXXXX	FVVIQNEDLGPAS(0.999)PLDS(0.001)TFYR	13	3	0.28997			5589;5590;5591;5592	5590	16942	21694	17828	11870	13787	12737
sp|P04792|HSPB1_HUMAN	78	sp|P04792|HSPB1_HUMAN	sp|P04792|HSPB1_HUMAN	>sp|P04792|HSPB1_HUMAN Heat shock protein beta-1 OS=Homo sapiens OX=9606 GN=HSPB1 PE=1 SV=2	0.999991	7.83e-12	104.67	2	S	IESPAVAAPAYSRALSRQLSSGVSEIRHTAD	X;X;Phospho (STY);X;X;X;X;X;X;X;X;X;X;X;X;Phospho (STY);X;X;X;Phospho (STY);Phospho (STY);X;X;Phospho (STY);X;X;X;X;X;X;X	XXXXXXXXXXXXXPPPPPPPPPPPPPPXXXX	ALS(1)RQLS(0.664)S(0.334)GVS(0.002)EIR	3	3	-0.16586			1220;1221;1222;1223;1224;1225	1221	92378	123720	111940	53951	53883	55846
sp|P04792|HSPB1_HUMAN	82	sp|P04792|HSPB1_HUMAN	sp|P04792|HSPB1_HUMAN	>sp|P04792|HSPB1_HUMAN Heat shock protein beta-1 OS=Homo sapiens OX=9606 GN=HSPB1 PE=1 SV=2	0.996579	3.68e-33	156.57	1;2	S	AVAAPAYSRALSRQLSSGVSEIRHTADRWRV	X;X;X;X;X;X;X;X;X;X;X;Phospho (STY);X;X;X;Phospho (STY);Phospho (STY);X;X;X;X;X;X;X;X;X;X;X;X;X;X	XXXXXXXXXPPPPPPPPPPPPPPXXXXXXXX	QLS(0.997)S(0.993)GVS(0.01)EIR	3	2	0.21488			1220;1221;1222;1223;1224;1225;12611;12615;12620;12626;12628;12629	12629	143670	237380	225460	94959	98084	92479
sp|P04792|HSPB1_HUMAN	83	sp|P04792|HSPB1_HUMAN	sp|P04792|HSPB1_HUMAN	>sp|P04792|HSPB1_HUMAN Heat shock protein beta-1 OS=Homo sapiens OX=9606 GN=HSPB1 PE=1 SV=2	0.993448	3.68e-33	156.57	1;2	S	VAAPAYSRALSRQLSSGVSEIRHTADRWRVS	X;X;X;X;X;X;X;X;X;X;X;X;X;X;Phospho (STY);Phospho (STY);X;X;X;X;X;X;X;X;X;X;X;X;X;X;X	XXXXXXXXXXXXPPPPPPPPPPXXXXXXXXX	QLS(0.997)S(0.993)GVS(0.01)EIR	4	2	0.21488			12622;12629	12629	27104	51302	43123	21422	21510	18045
sp|P04792|HSPB1_HUMAN	86	sp|P04792|HSPB1_HUMAN	sp|P04792|HSPB1_HUMAN	>sp|P04792|HSPB1_HUMAN Heat shock protein beta-1 OS=Homo sapiens OX=9606 GN=HSPB1 PE=1 SV=2	0.831984	0.000200888	82.549	1	S	PAYSRALSRQLSSGVSEIRHTADRWRVSLDV	X;X;X;X;X;X;X;X;X;X;X;X;X;X;X;Phospho (STY);X;X;X;X;X;X;X;X;X;X;X;X;X;X;X	XXXXXXXXXPPPPPPPPPPXXXXXXXXXXXX	QLS(0.058)S(0.11)GVS(0.832)EIR	7	2	-0.78683			12623;12624;12625	12624	35324	81941	57051	23902	27586	22616
sp|P04792|HSPB1_HUMAN	15	sp|P04792|HSPB1_HUMAN	sp|P04792|HSPB1_HUMAN	>sp|P04792|HSPB1_HUMAN Heat shock protein beta-1 OS=Homo sapiens OX=9606 GN=HSPB1 PE=1 SV=2	1	0.00387543	83.734	1	S	_MTERRVPFSLLRGPSWDPFRDWYPHSRLFD	X;X;X;X;X;X;X;X;X;X;X;X;X;X;X;Phospho (STY);X;X;X;X;X;X;X;X;X;X;X;X;X;X;X	XXXXXXXXXXXXXPPPPPPPPXXXXXXXXXX	GPS(1)WDPFR	3	2	-0.32436			6751;6752;6753;6754	6754	90581	349560	363300	69532	110290	118570
sp|P04792|HSPB1_HUMAN	65	sp|P04792|HSPB1_HUMAN	sp|P04792|HSPB1_HUMAN	>sp|P04792|HSPB1_HUMAN Heat shock protein beta-1 OS=Homo sapiens OX=9606 GN=HSPB1 PE=1 SV=2	0.999999	1.09e-12	89.209	1	S	SWPGYVRPLPPAAIESPAVAAPAYSRALSRQ	X;X;X;X;X;X;X;X;X;X;X;X;X;X;X;Phospho (STY);X;X;X;X;X;X;X;X;X;X;X;X;Phospho (STY);X;X	XXXXXXXPPPPPPPPPPPPPPPPPPPXXXXX	PLPPAAIES(1)PAVAAPAYSR	9	3	-0.14499			12098;12099	12099	19565	28851	22349	13978	12638	12025
sp|P04920|B3A2_HUMAN	144	sp|P04920|B3A2_HUMAN	sp|P04920|B3A2_HUMAN	>sp|P04920|B3A2_HUMAN Anion exchange protein 2 OS=Homo sapiens OX=9606 GN=SLC4A2 PE=1 SV=4	0.959257	2.83e-36	128.94	1	S	DEASEAEGARALTQPSPVSTPSSVQFFLQED	X;X;X;Phospho (STY);X;X;X;X;X;X;X;X;X;X;X;Phospho (STY);X;X;X;X;X;X;X;X;X;X;X;X;X;X;X	XXXXXXXXXXPPPPPPPPPPPPPPPPPPPPP	ALT(0.037)QPS(0.959)PVS(0.003)TPSSVQFFLQEDDSADR	6	3	2.4994			1245;1246;1247	1246	15264	18722	17078	13600	11998	10950
sp|P04920|B3A2_HUMAN	113	sp|P04920|B3A2_HUMAN	sp|P04920|B3A2_HUMAN	>sp|P04920|B3A2_HUMAN Anion exchange protein 2 OS=Homo sapiens OX=9606 GN=SLC4A2 PE=1 SV=4	0.869256	2.34e-74	186.11	1;2	S	TPQGPGRKPRRRPGASPTGETPTIEEGEEDE	X;X;X;X;X;X;X;X;X;X;X;X;X;X;X;Phospho (STY);X;X;X;X;X;X;X;X;X;X;X;X;X;X;X	XXXXXXXXXXPPPPPPPPPPPPPPPPPPPPP	RRPGAS(0.869)PT(0.064)GET(0.064)PT(0.002)IEEGEEDEDEASEAEGAR	6	3	0.00027666			14180;14181;14183	14181	8937.6	19588	14051	8685.5	7293.6	8372
sp|P04920|B3A2_HUMAN	132	sp|P04920|B3A2_HUMAN	sp|P04920|B3A2_HUMAN	>sp|P04920|B3A2_HUMAN Anion exchange protein 2 OS=Homo sapiens OX=9606 GN=SLC4A2 PE=1 SV=4	1	8.8e-35	127.13	1;2	S	ETPTIEEGEEDEDEASEAEGARALTQPSPVS	X;X;X;X;X;X;X;X;X;X;X;X;X;X;X;Phospho (STY);X;X;X;X;X;X;X;X;X;X;X;Phospho (STY);X;X;X	PPPPPPPPPPPPPPPPPPPPPPXXXXXXXXX	RRPGAS(0.712)PT(0.256)GET(0.029)PT(0.003)IEEGEEDEDEAS(1)EAEGAR	25	4	-0.41304			14179;14183	14183	6904.1	13328	8914.6	6395.9	4939.6	5372.4
sp|P04920|B3A2_HUMAN	173	sp|P04920|B3A2_HUMAN	sp|P04920|B3A2_HUMAN	>sp|P04920|B3A2_HUMAN Anion exchange protein 2 OS=Homo sapiens OX=9606 GN=SLC4A2 PE=1 SV=4	0.951409	8.72e-08	75.691	1	S	EDDSADRKAERTSPSSPAPLPHQEATPRASK	X;X;X;X;X;X;X;X;X;X;X;X;X;X;X;Phospho (STY);X;X;X;X;X;X;X;X;X;X;X;X;X;X;X	XXXXXXXXXXXPPPPPPPPPPPPPPPPPXXX	T(0.006)S(0.006)PS(0.036)S(0.951)PAPLPHQEATPR	5	3	-1.448			19000;19001	19001	27036	45878	39270	22957	20594	19540
sp|P04921|GLPC_HUMAN	104	sp|P04921|GLPC_HUMAN	sp|P04921|GLPC_HUMAN	>sp|P04921|GLPC_HUMAN Glycophorin-C OS=Homo sapiens OX=9606 GN=GYPC PE=1 SV=1	0.996846	4.5e-18	86.688	1	S	GTYHTNEAKGTEFAESADAALQGDPALQDAG	X;X;X;X;X;X;X;X;X;X;X;X;X;X;X;Phospho (STY);X;X;X;X;X;X;X;X;X;X;X;X;X;X;X	XXXXXXXXXPPPPPPPPPPPPPPPPPPPPPP	GT(0.003)EFAES(0.997)ADAALQGDPALQDAGDSSR	7	3	0.37082			7293;7294;7295	7295	23864	34191	28494	21035	19072	16543
sp|P04921|GLPC_HUMAN	121	sp|P04921|GLPC_HUMAN	sp|P04921|GLPC_HUMAN	>sp|P04921|GLPC_HUMAN Glycophorin-C OS=Homo sapiens OX=9606 GN=GYPC PE=1 SV=1	0.5	1.51e-15	78.21	1	S	DAALQGDPALQDAGDSSRKEYFI________	X;X;X;X;X;X;X;X;X;X;X;X;X;X;X;Phospho (STY);X;X;X;X;X;X;X;X;X;X;X;X;X;X;X	PPPPPPPPPPPPPPPPPPPPPPPXXXXXXXX	GTEFAESADAALQGDPALQDAGDS(0.5)S(0.5)RK	24	4	-0.35797			7296;7297	7296	14414	18170	13142	13918	12079	9189.7
sp|P04921|GLPC_HUMAN	122	sp|P04921|GLPC_HUMAN	sp|P04921|GLPC_HUMAN	>sp|P04921|GLPC_HUMAN Glycophorin-C OS=Homo sapiens OX=9606 GN=GYPC PE=1 SV=1	0.5	1.51e-15	78.21	1	S	AALQGDPALQDAGDSSRKEYFI_________	X;X;X;X;X;X;X;X;X;X;X;X;X;X;X;X;X;X;X;X;X;X;X;X;X;X;X;X;X;X;X	XXXXXXXXXXXXXXXXXXXXXXXXXXXXXXX	GTEFAESADAALQGDPALQDAGDS(0.5)S(0.5)RK	25	4	-0.35797			7296;7297	7296	14414	18170	13142	13918	12079	9189.7
sp|P05114|HMGN1_HUMAN	7	sp|P05114|HMGN1_HUMAN	sp|P05114|HMGN1_HUMAN	>sp|P05114|HMGN1_HUMAN Non-histone chromosomal protein HMG-14 OS=Homo sapiens OX=9606 GN=HMGN1 PE=1 SV=3	0.964648	0.000254128	52.003	1	S	_________MPKRKVSSAEGAAKEEPKRRSA	X;X;X;X;X;X;X;X;X;X;X;X;X;X;X;Phospho (STY);X;X;X;X;X;X;X;X;X;X;X;X;X;X;X	XXXXXXXXXXXXXPPPPPPPPPPXXXXXXXX	KVS(0.965)S(0.035)AEGAAK	3	2	-0.45498			9970;9972;9974	9974	37607	71700	83313	19625	31551	30393
sp|P05114|HMGN1_HUMAN	8	sp|P05114|HMGN1_HUMAN	sp|P05114|HMGN1_HUMAN	>sp|P05114|HMGN1_HUMAN Non-histone chromosomal protein HMG-14 OS=Homo sapiens OX=9606 GN=HMGN1 PE=1 SV=3	0.706465	5.7e-05	54.128	1	S	________MPKRKVSSAEGAAKEEPKRRSAR	X;X;X;X;X;X;X;X;X;X;X;X;X;X;X;Phospho (STY);X;X;X;X;X;X;X;X;X;X;X;X;X;X;X	XXXXXXXXXXXXPPPPPPPPPPPPPPXXXXX	KVS(0.294)S(0.706)AEGAAK	4	3	0.11921			9971;9973;9975	9973	36979	82439	94956	15624	36229	37629
sp|P05114|HMGN1_HUMAN	86	sp|P05114|HMGN1_HUMAN	sp|P05114|HMGN1_HUMAN	>sp|P05114|HMGN1_HUMAN Non-histone chromosomal protein HMG-14 OS=Homo sapiens OX=9606 GN=HMGN1 PE=1 SV=3	0.999988	1.63e-14	138.32	1;2	S	KEDLPAENGETKTEESPASDEAGEKEAKSD_	X;X;X;X;X;X;X;X;X;X;X;X;X;X;X;Phospho (STY);X;X;Phospho (STY);X;X;X;X;X;X;X;X;X;X;X;X	XXXXXXXXXXXXPPPPPPPPPPPPPXXXXXX	TEES(1)PAS(1)DEAGEK	4	2	-1.4319			18226;18228;18231;18234;18235;18236;18237;18238	18238	161540	239650	175380	122730	91416	92575
sp|P05114|HMGN1_HUMAN	89	sp|P05114|HMGN1_HUMAN	sp|P05114|HMGN1_HUMAN	>sp|P05114|HMGN1_HUMAN Non-histone chromosomal protein HMG-14 OS=Homo sapiens OX=9606 GN=HMGN1 PE=1 SV=3	1	1.49e-28	163.48	1;2	S	LPAENGETKTEESPASDEAGEKEAKSD____	X;X;X;X;X;X;X;X;X;X;X;X;Phospho (STY);X;X;Phospho (STY);X;X;X;X;X;X;X;X;X;X;X;X;X;X;X	XXXXXXXXXPPPPPPPPPPPPPPPPXXXXXX	TEES(1)PAS(1)DEAGEK	7	2	-1.4319			18227;18229;18230;18232;18233;18234;18235;18236;18237;18238;18239	18238	229690	326080	251860	165430	125950	124960
sp|P05114|HMGN1_HUMAN	99	sp|P05114|HMGN1_HUMAN	sp|P05114|HMGN1_HUMAN	>sp|P05114|HMGN1_HUMAN Non-histone chromosomal protein HMG-14 OS=Homo sapiens OX=9606 GN=HMGN1 PE=1 SV=3	1	1.92e-26	142.71	1	S	EESPASDEAGEKEAKSD______________	X;X;Phospho (STY);X;X;Phospho (STY);X;X;X;X;X;X;X;X;X;Phospho (STY);X;X;X;X;X;X;X;X;X;X;X;X;X;X;X	PPPPPPPPPPPPPPPPPXXXXXXXXXXXXXX	TEESPASDEAGEKEAKS(1)D	17	4	-0.48999			18240;18241;18242;18243	18241	64307	104720	73720	39544	34262	34739
sp|P05186|PPBT_HUMAN	110	sp|P05186|PPBT_HUMAN	sp|P05186|PPBT_HUMAN	>sp|P05186|PPBT_HUMAN Alkaline phosphatase, tissue-nonspecific isozyme OS=Homo sapiens OX=9606 GN=ALPL PE=1 SV=4	0.979911	1.36e-21	110.91	1	S	VALSKTYNTNAQVPDSAGTATAYLCGVKANE	X;X;X;X;X;X;X;X;X;X;X;X;X;X;X;Phospho (STY);X;X;X;X;X;X;X;X;X;X;X;X;X;X;X	XXXXXPPPPPPPPPPPPPPPPPPPPPPPXXX	TYNTNAQVPDS(0.98)AGT(0.019)AT(0.001)AYLCGVK	11	3	0.040092			19249;19250;19251;19252	19250	28711	81736	64388	23133	21426	21493
sp|P05387|RLA2_HUMAN;sp|P05386|RLA1_HUMAN	102;101	sp|P05387|RLA2_HUMAN	sp|P05387|RLA2_HUMAN	>sp|P05387|RLA2_HUMAN 60S acidic ribosomal protein P2 OS=Homo sapiens OX=9606 GN=RPLP2 PE=1 SV=1;>sp|P05386|RLA1_HUMAN 60S acidic ribosomal protein P1 OS=Homo sapiens OX=9606 GN=RPLP1 PE=1 SV=1	1	4.35e-20	130.35	1;2	S	APAAAEEKKDEKKEESEESDDDMGFGLFD__	X;X;X;X;X;X;X;X;X;X;X;X;X;X;X;Phospho (STY);X;X;Phospho (STY);X;X;X;Oxidation (M);X;X;X;X;X;X;X;X	XXXXXXXXXPPPPPPPPPPPPPPPPPPPPXX	KEES(1)EES(1)DDDMGFGLFD	4	3	-3.1733			2537;2538;2539;8694;8695;8698;8699;8701;8705;8708;8709;8721;8722;8723;8724;8725;8726;8727;8728;8729;8730;8731;8732;8733;8734;8735;8736;8737;8738;8739;8740;8741;8742;8743;8744;8745;8746;8747;8748;8749;8750;8751;8752;8753;8754;8755;8756;8757;8758;8759;8760;8761;8762;8763;8764;8765;8766;8767;8768;8769;8770;8771;8772;8773;8774;8775;8776;8777;8778;8779;8780;8781;8782	8782	1464500	2029100	2250900	916790	911600	958800
sp|P05387|RLA2_HUMAN;sp|P05386|RLA1_HUMAN	105;104	sp|P05387|RLA2_HUMAN	sp|P05387|RLA2_HUMAN	>sp|P05387|RLA2_HUMAN 60S acidic ribosomal protein P2 OS=Homo sapiens OX=9606 GN=RPLP2 PE=1 SV=1;>sp|P05386|RLA1_HUMAN 60S acidic ribosomal protein P1 OS=Homo sapiens OX=9606 GN=RPLP1 PE=1 SV=1	1	4.33e-30	148.33	1;2	S	AAEEKKDEKKEESEESDDDMGFGLFD_____	X;X;X;X;X;X;X;X;X;X;X;X;Phospho (STY);X;X;Phospho (STY);X;X;X;Oxidation (M);X;X;X;X;X;X;X;X;X;X;X	XXXXXXPPPPPPPPPPPPPPPPPPPPXXXXX	KEES(1)EES(1)DDDMGFGLFD	7	3	-3.1733			2537;2538;2539;8689;8690;8691;8692;8693;8696;8697;8700;8702;8703;8704;8706;8707;8710;8711;8712;8713;8714;8715;8716;8717;8718;8719;8720;8721;8722;8723;8724;8725;8726;8727;8728;8729;8730;8731;8732;8733;8734;8735;8736;8737;8738;8739;8740;8741;8742;8743;8744;8745;8746;8747;8748;8749;8750;8751;8752;8753;8754;8755;8756;8757;8758;8759;8760;8761;8762;8763;8764;8765;8766;8767;8768;8769;8770;8771;8772;8773…	8782	1626700	2358200	2636100	1052000	1054600	1072500
sp|Q8NHW5|RLA0L_HUMAN;sp|P05388|RLA0_HUMAN	304;304	sp|Q8NHW5|RLA0L_HUMAN	sp|Q8NHW5|RLA0L_HUMAN	>sp|Q8NHW5|RLA0L_HUMAN 60S acidic ribosomal protein P0-like OS=Homo sapiens OX=9606 GN=RPLP0P6 PE=5 SV=1;>sp|P05388|RLA0_HUMAN 60S acidic ribosomal protein P0 OS=Homo sapiens OX=9606 GN=RPLP0 PE=1 SV=1	1	7.38e-24	130.13	1;2	S	PAAAAAPAKVEAKEESEESDEDMGFGLFD__	X;X;X;X;X;X;X;X;X;X;X;X;X;X;X;Phospho (STY);X;X;Phospho (STY);X;X;X;Oxidation (M);X;X;X;X;X;X;X;X	XXXXXXXXXPPPPPPPPPPPPPPPPPPPPXX	VEAKEES(1)EES(1)DEDMGFGLFD	7	4	-3.8143			19508;19510;19512;19516;19519;19520;19522;19523;19524;19525;19526;19527;19528;19529;19530;19531;19532;19533;19534;19535;19536;19537;19538;19539;19540;19541;19542;19543	19543	1241900	1785700	1896500	728080	779210	789380
sp|Q8NHW5|RLA0L_HUMAN;sp|P05388|RLA0_HUMAN	307;307	sp|Q8NHW5|RLA0L_HUMAN	sp|Q8NHW5|RLA0L_HUMAN	>sp|Q8NHW5|RLA0L_HUMAN 60S acidic ribosomal protein P0-like OS=Homo sapiens OX=9606 GN=RPLP0P6 PE=5 SV=1;>sp|P05388|RLA0_HUMAN 60S acidic ribosomal protein P0 OS=Homo sapiens OX=9606 GN=RPLP0 PE=1 SV=1	1	3.91e-24	145.72	1;2	S	AAAPAKVEAKEESEESDEDMGFGLFD_____	X;X;X;X;X;X;X;X;X;X;X;X;Phospho (STY);X;X;Phospho (STY);X;X;X;Oxidation (M);X;X;X;X;X;X;X;X;X;X;X	XXXXXXPPPPPPPPPPPPPPPPPPPPXXXXX	VEAKEES(1)EES(1)DEDMGFGLFD	10	4	-3.8143			3766;19507;19509;19511;19513;19514;19515;19517;19518;19521;19524;19525;19526;19527;19528;19529;19530;19531;19532;19533;19534;19535;19536;19537;19538;19539;19540;19541;19542;19543	19543	1261000	1805200	1895300	741700	801080	804390
sp|P05455|LA_HUMAN	366	sp|P05455|LA_HUMAN	sp|P05455|LA_HUMAN	>sp|P05455|LA_HUMAN Lupus La protein OS=Homo sapiens OX=9606 GN=SSB PE=1 SV=2	1	3.69e-10	72.227	1	S	GKGKVQFQGKKTKFASDDEHDEHDENGATGP	X;X;X;X;X;X;X;X;X;X;X;X;X;X;X;Phospho (STY);X;X;X;X;X;X;X;X;X;X;X;X;X;X;X	XXXXXXXXXXXXXPPPPPPPPPPPPPPPPPP	FAS(1)DDEHDEHDENGATGPVK	3	4	-0.27511			5267	5267	8925.1	14043	12094	7749.1	6241.1	6498.7
sp|P05783|K1C18_HUMAN	398	sp|P05783|K1C18_HUMAN	sp|P05783|K1C18_HUMAN	>sp|P05783|K1C18_HUMAN Keratin, type I cytoskeletal 18 OS=Homo sapiens OX=9606 GN=KRT18 PE=1 SV=2	0.806566	9.01e-62	183.83	1	S	LLEDGEDFNLGDALDSSNSMQTIQKTTTRRI	X;X;X;X;X;X;X;X;X;X;X;X;X;X;X;Phospho (STY);X;X;X;Oxidation (M);X;X;X;X;X;X;X;X;X;X;X	PPPPPPPPPPPPPPPPPPPPPPPPPXXXXXX	LLEDGEDFNLGDALDS(0.807)S(0.188)NS(0.006)MQTIQK	16	3	0.71371			10644;10650;10657;10665	10650	21507	39096	42264	14557	15675	14429
sp|P05783|K1C18_HUMAN	399	sp|P05783|K1C18_HUMAN	sp|P05783|K1C18_HUMAN	>sp|P05783|K1C18_HUMAN Keratin, type I cytoskeletal 18 OS=Homo sapiens OX=9606 GN=KRT18 PE=1 SV=2	0.780423	2.17e-69	183.24	1	S	LEDGEDFNLGDALDSSNSMQTIQKTTTRRIV	X;X;X;X;X;X;X;X;X;X;X;X;X;X;X;Phospho (STY);X;X;Oxidation (M);X;X;X;X;X;X;X;X;X;X;X;X	PPPPPPPPPPPPPPPPPPPPPPPPXXXXXXX	RLLEDGEDFNLGDALDS(0.187)S(0.78)NS(0.032)MQTIQK	18	3	0.71393			10643;10661;10662;13763;13765	13765	56999	72120	148160	31416	52222	58099
sp|P05783|K1C18_HUMAN	401	sp|P05783|K1C18_HUMAN	sp|P05783|K1C18_HUMAN	>sp|P05783|K1C18_HUMAN Keratin, type I cytoskeletal 18 OS=Homo sapiens OX=9606 GN=KRT18 PE=1 SV=2	0.893498	1.31e-18	72.023	1	S	DGEDFNLGDALDSSNSMQTIQKTTTRRIVDG	X;X;X;X;X;X;X;X;X;X;X;X;X;X;X;Phospho (STY);Oxidation (M);X;X;X;X;X;X;X;X;X;X;X;X;X;X	PPPPPPPPPPPPPPPPPPPPPPXXXXXXXXX	LLEDGEDFNLGDALDS(0.046)S(0.058)NS(0.893)MQT(0.002)IQK	19	3	0.96969			10653;10659	10653	9057.9	17142	11912	6590.7	7481.8	5500.1
sp|P05783|K1C18_HUMAN	42	sp|P05783|K1C18_HUMAN	sp|P05783|K1C18_HUMAN	>sp|P05783|K1C18_HUMAN Keratin, type I cytoskeletal 18 OS=Homo sapiens OX=9606 GN=KRT18 PE=1 SV=2	0.725821	1.04e-06	66.12	1	S	RPVSSAASVYAGAGGSGSRISVSRSTSFRGG	X;X;X;X;X;X;X;X;X;X;X;X;X;X;X;Phospho (STY);X;X;X;X;X;X;X;X;X;X;X;X;X;X;X	XPPPPPPPPPPPPPPPPPPXXXXXXXXXXXX	PVSSAAS(0.001)VY(0.012)AGAGGS(0.726)GS(0.26)R	15	3	0.20506			12117;12118	12118	23894	37166	31009	21489	18311	16436
sp|P05783|K1C18_HUMAN	23	sp|P05783|K1C18_HUMAN	sp|P05783|K1C18_HUMAN	>sp|P05783|K1C18_HUMAN Keratin, type I cytoskeletal 18 OS=Homo sapiens OX=9606 GN=KRT18 PE=1 SV=2	0.999997	1.48e-05	80.871	1	S	TFSTNYRSLGSVQAPSYGARPVSSAASVYAG	X;X;X;X;X;X;X;X;X;X;X;X;X;X;X;Phospho (STY);X;X;X;X;X;X;X;X;X;X;X;X;X;X;X	XXXXXXXPPPPPPPPPPPPPXXXXXXXXXXX	SLGSVQAPS(1)YGAR	9	2	1.1143			16039	16039	12735	30085	21212	9537.9	9564.9	8373.5
sp|P05783|K1C18_HUMAN	420	sp|P05783|K1C18_HUMAN	sp|P05783|K1C18_HUMAN	>sp|P05783|K1C18_HUMAN Keratin, type I cytoskeletal 18 OS=Homo sapiens OX=9606 GN=KRT18 PE=1 SV=2	0.982935	0.0369455	31.701	1	S	IQKTTTRRIVDGKVVSETNDTKVLRH_____	X;X;X;X;X;X;X;X;X;X;X;X;X;X;X;Phospho (STY);X;X;X;X;X;X;X;X;X;X;X;X;X;X;X	XXXXXXXXXXXXXPPPPPPPPPXXXXXXXXX	VVS(0.983)ET(0.012)NDT(0.005)K	3	2	0.85916			20387;20388	20387	36884	83368	66795	30639	27293	25952
sp|P06241|FYN_HUMAN	21	sp|P06241|FYN_HUMAN	sp|P06241|FYN_HUMAN	>sp|P06241|FYN_HUMAN Tyrosine-protein kinase Fyn OS=Homo sapiens OX=9606 GN=FYN PE=1 SV=3	0.949635	0.0340359	36.113	1	S	CKDKEATKLTEERDGSLNQSSGYRYGTDPTP	X;X;X;X;X;X;X;X;X;X;X;X;X;X;X;Phospho (STY);X;X;X;X;X;X;X;X;X;X;X;X;X;X;X	XXXXXXXXXXXXXPPPPPPPPPPPXXXXXXX	DGS(0.95)LNQS(0.028)S(0.007)GY(0.016)R	3	2	-1.5281			2648	2648	16205	19795	16875	11099	8854.8	7720.3
sp|P06576|ATPB_HUMAN	529	sp|P06576|ATPB_HUMAN	sp|P06576|ATPB_HUMAN	>sp|P06576|ATPB_HUMAN ATP synthase subunit beta, mitochondrial OS=Homo sapiens OX=9606 GN=ATP5F1B PE=1 SV=3	0.917087	0.000744043	91.799	1	S	EEAVAKADKLAEEHSS_______________	X;X;X;X;X;X;X;X;X;X;X;X;X;X;X;Phospho (STY);X;X;X;X;X;X;X;X;X;X;X;X;X;X;X	XXXXXXPPPPPPPPPPXXXXXXXXXXXXXXX	LAEEHS(0.083)S(0.917)	7	2	1.3381			443;444;445;446;10053	10053	63589	94867	68349	42681	43730	38138
sp|P06733|ENOA_HUMAN;sp|P13929|ENOB_HUMAN;sp|P09104|ENOG_HUMAN	40;40;40	sp|P06733|ENOA_HUMAN	sp|P06733|ENOA_HUMAN	>sp|P06733|ENOA_HUMAN Alpha-enolase OS=Homo sapiens OX=9606 GN=ENO1 PE=1 SV=2;>sp|P13929|ENOB_HUMAN Beta-enolase OS=Homo sapiens OX=9606 GN=ENO3 PE=1 SV=5;>sp|P09104|ENOG_HUMAN Gamma-enolase OS=Homo sapiens OX=9606 GN=ENO2 PE=1 SV=3	0.853273	5.7e-11	93.311	1	S	FTSKGLFRAAVPSGASTGIYEALELRDNDKT	X;X;X;X;X;X;X;X;X;X;X;X;X;X;X;Phospho (STY);X;X;X;X;X;X;X;X;X;X;X;X;X;X;X	XXXXXXXXPPPPPPPPPPPPPPPPPPXXXXX	AAVPSGAS(0.853)T(0.147)GIYEALELR	8	3	0.46141			376;377	377	10328	14557	11828	7346.1	7099.6	5927.6
sp|P06733|ENOA_HUMAN	419	sp|P06733|ENOA_HUMAN	sp|P06733|ENOA_HUMAN	>sp|P06733|ENOA_HUMAN Alpha-enolase OS=Homo sapiens OX=9606 GN=ENO1 PE=1 SV=2	1	0.00183465	12.881	1	S	LAKYNQLLRIEEELGSKAKFAGRNFRNPLAK	X;X;X;X;X;X;X;X;X;X;X;X;X;X;X;Phospho (STY);X;X;X;X;X;X;X;X;X;X;X;X;X;X;X	XXXXXXXXXPPPPPPPPPPXXXXXXXXXXXX	IEEELGS(1)KAK	7	3	-0.10863			7896	7896	22604	60017	33616	16427	18596	16097
sp|P06734|FCER2_HUMAN	135	sp|P06734|FCER2_HUMAN	sp|P06734|FCER2_HUMAN	>sp|P06734|FCER2_HUMAN Low affinity immunoglobulin epsilon Fc receptor OS=Homo sapiens OX=9606 GN=FCER2 PE=1 SV=1	1	0.0353247	18.666	1	S	LSSFKSQELNERNEASDLLERLREEVTKLRM	X;X;X;X;X;X;X;X;X;X;X;X;X;X;X;Phospho (STY);X;X;X;X;X;X;X;X;X;X;X;X;X;X;X	XXXXXXXXXXXXPPPPPPPPPXXXXXXXXXX	NEAS(1)DLLER	4	2	1.9763			11699	11699	16993	16874	12630	14273	9587.5	9694.8
sp|P06748|NPM_HUMAN	125	sp|P06748|NPM_HUMAN	sp|P06748|NPM_HUMAN	>sp|P06748|NPM_HUMAN Nucleophosmin OS=Homo sapiens OX=9606 GN=NPM1 PE=1 SV=2	1	8.05e-53	165.35	1	S	HISGQHLVAVEEDAESEDEEEEDVKLLSISG	X;X;X;X;X;X;X;X;X;X;X;X;X;X;X;Phospho (STY);X;X;X;X;X;X;X;X;X;X;X;Phospho (STY);X;X;X	PPPPPPPPPPPPPPPPPPPPPPPPPXXXXXX	CGSGPVHISGQHLVAVEEDAES(1)EDEEEEDVK	22	4	-0.18838			2353;2354;2355;2356;2357;2358;2359;2360;2361;2362;2363;2364;2365;2366;2367;2368;2369;2370;2371;2372;2373;2374;2375;2376;2377;2378	2377	264940	544740	367040	188600	198630	186890
sp|P06748|NPM_HUMAN	70	sp|P06748|NPM_HUMAN	sp|P06748|NPM_HUMAN	>sp|P06748|NPM_HUMAN Nucleophosmin OS=Homo sapiens OX=9606 GN=NPM1 PE=1 SV=2	0.944041	2.85e-07	61.336	1	S	DELHIVEAEAMNYEGSPIKVTLATLKMSVQP	X;X;X;X;X;X;X;X;X;X;X;X;X;X;X;Phospho (STY);X;X;X;X;X;X;X;X;X;X;X;X;X;X;X	PPPPPPPPPPPPPPPPPPPXXXXXXXXXXXX	DELHIVEAEAMNY(0.056)EGS(0.944)PIK	16	4	0.085618			2540	2540	4527	8657.2	7255.9	4226.6	3767	2705.8
sp|P06748|NPM_HUMAN	242	sp|P06748|NPM_HUMAN	sp|P06748|NPM_HUMAN	>sp|P06748|NPM_HUMAN Nucleophosmin OS=Homo sapiens OX=9606 GN=NPM1 PE=1 SV=2	0.59369	0.0019986	55.203	1	S	SFKKQEKTPKTPKGPSSVEDIKAKMQASIEK	Phospho (STY);X;X;X;X;X;X;X;X;X;X;X;X;X;X;Phospho (STY);X;X;X;X;X;X;X;X;X;X;X;X;X;X;X	XXXXXXXXXXXXXPPPPPPPPPXXXXXXXXX	GPS(0.594)S(0.406)VEDIK	3	2	0.42182			6748	6748	16043	33365	22030	12263	10677	10344
sp|P06748|NPM_HUMAN	243	sp|P06748|NPM_HUMAN	sp|P06748|NPM_HUMAN	>sp|P06748|NPM_HUMAN Nucleophosmin OS=Homo sapiens OX=9606 GN=NPM1 PE=1 SV=2	0.972046	0.00121966	59.689	1	S	FKKQEKTPKTPKGPSSVEDIKAKMQASIEKG	X;X;X;X;X;X;X;X;X;X;X;X;X;X;X;Phospho (STY);X;X;X;X;X;X;X;X;X;X;X;X;X;X;X	XXXXXXXXXXXXPPPPPPPPPXXXXXXXXXX	GPS(0.028)S(0.972)VEDIK	4	2	-0.6717			6749;6750	6749	29385	58571	38120	21712	21277	17974
sp|P06748|NPM_HUMAN	227	sp|P06748|NPM_HUMAN	sp|P06748|NPM_HUMAN	>sp|P06748|NPM_HUMAN Nucleophosmin OS=Homo sapiens OX=9606 GN=NPM1 PE=1 SV=2	1	0.00814144	34.435	1	S	KDSKPSSTPRSKGQESFKKQEKTPKTPKGPS	X;X;X;X;X;X;X;X;X;X;X;X;X;X;X;Phospho (STY);X;X;X;X;X;X;X;X;X;X;X;X;X;X;Phospho (STY)	XXXXXXXXXXXXPPPPPPPXXXXXXXXXXXX	GQES(1)FKK	4	3	-0.0066464			6776	6776	12281	46548	38770	8470.4	11138	7692.4
sp|P06748|NPM_HUMAN	137	sp|P06748|NPM_HUMAN	sp|P06748|NPM_HUMAN	>sp|P06748|NPM_HUMAN Nucleophosmin OS=Homo sapiens OX=9606 GN=NPM1 PE=1 SV=2	0.962792	0.0223202	27.771	1	S	DAESEDEEEEDVKLLSISGKRSAPGGGSKVP	X;X;X;Phospho (STY);X;X;X;X;X;X;X;X;X;X;X;Phospho (STY);X;X;X;X;X;X;X;X;X;X;X;X;X;X;X	XXXXXXXXXXXXXPPPPPPPXXXXXXXXXXX	LLS(0.963)IS(0.037)GK	3	2	-0.085162			10760;10761	10760	65442	46028	40435	25182	23462	28490
sp|P07355|ANXA2_HUMAN;sp|A6NMY6|AXA2L_HUMAN	85;85	sp|P07355|ANXA2_HUMAN	sp|P07355|ANXA2_HUMAN	>sp|P07355|ANXA2_HUMAN Annexin A2 OS=Homo sapiens OX=9606 GN=ANXA2 PE=1 SV=2;>sp|A6NMY6|AXA2L_HUMAN Putative annexin A2-like protein OS=Homo sapiens OX=9606 GN=ANXA2P2 PE=5 SV=2	1	0.0116831	22.87	1	S	DIAFAYQRRTKKELASALKSALSGHLETVIL	X;X;X;X;X;X;X;X;X;X;X;X;X;X;X;Phospho (STY);X;X;X;X;X;X;X;X;X;X;X;X;X;X;X	XXXXXXXXXXXXPPPPPPPXXXXXXXXXXXX	ELAS(1)ALK	4	2	0.019874			4268;4269	4269	43429	33181	30057	37908	28751	23354
sp|P07355|ANXA2_HUMAN;sp|A6NMY6|AXA2L_HUMAN	127;127	sp|P07355|ANXA2_HUMAN	sp|P07355|ANXA2_HUMAN	>sp|P07355|ANXA2_HUMAN Annexin A2 OS=Homo sapiens OX=9606 GN=ANXA2 PE=1 SV=2;>sp|A6NMY6|AXA2L_HUMAN Putative annexin A2-like protein OS=Homo sapiens OX=9606 GN=ANXA2P2 PE=5 SV=2	0.999778	6.64e-20	125.31	1	S	SELKASMKGLGTDEDSLIEIICSRTNQELQE	X;X;X;X;X;X;X;X;X;X;X;X;X;X;X;Phospho (STY);X;X;X;X;X;X;X;X;X;X;X;X;X;X;X	XXXXXXXXPPPPPPPPPPPPPPPPXXXXXXX	GLGTDEDS(1)LIEIICSR	8	3	-0.78496			6286	6286	4166.3	3950	2921.5	3713	2728.2	2044
sp|P07355|ANXA2_HUMAN;sp|A6NMY6|AXA2L_HUMAN	26;26	sp|P07355|ANXA2_HUMAN	sp|P07355|ANXA2_HUMAN	>sp|P07355|ANXA2_HUMAN Annexin A2 OS=Homo sapiens OX=9606 GN=ANXA2 PE=1 SV=2;>sp|A6NMY6|AXA2L_HUMAN Putative annexin A2-like protein OS=Homo sapiens OX=9606 GN=ANXA2P2 PE=5 SV=2	0.925634	6.91e-07	68.41	1	S	LSLEGDHSTPPSAYGSVKAYTNFDAERDALN	X;X;X;X;X;X;X;X;X;X;X;X;X;X;X;Phospho (STY);X;X;X;X;X;X;X;X;X;X;X;X;X;X;X	PPPPPPPPPPPPPPPPPPXXXXXXXXXXXXX	LSLEGDHST(0.001)PPS(0.002)AY(0.071)GS(0.926)VK	16	4	-0.1294			11068;11070	11068	29078	22057	18224	16139	14049	11791
sp|P07359|GP1BA_HUMAN	632	sp|P07359|GP1BA_HUMAN	sp|P07359|GP1BA_HUMAN	>sp|P07359|GP1BA_HUMAN Platelet glycoprotein Ib alpha chain OS=Homo sapiens OX=9606 GN=GP1BA PE=1 SV=2	0.992492	0.0121482	27.936	1	S	GRVGPLVAGRRPSALSQGRGQDLLSTVSIRY	X;X;X;X;X;X;X;X;X;X;X;X;X;X;X;Phospho (STY);X;X;X;X;X;X;X;X;X;X;X;X;X;X;X	XXXXXXXXXXPPPPPPPPPXXXXXXXXXXXX	RPS(0.008)ALS(0.992)QGR	6	2	0.95478			14040;14041	14041	13110	28642	17983	16181	9258.1	9053.6
sp|P07814|SYEP_HUMAN	880	sp|P07814|SYEP_HUMAN	sp|P07814|SYEP_HUMAN	>sp|P07814|SYEP_HUMAN Bifunctional glutamate/proline--tRNA ligase OS=Homo sapiens OX=9606 GN=EPRS PE=1 SV=5	0.491343	3.43e-07	53.914		S	KEKTGKEYIPGQPPLSQSSDSSPTRNSEPAG	X;X;X;X;X;X;X;X;X;X;X;X;X;X;X;Phospho (STY);X;X;X;X;Phospho (STY);X;X;X;X;X;X;X;X;X;X	XXXXXXPPPPPPPPPPPPPPPPPPPXXXXXX	EYIPGQPPLS(0.491)QS(0.374)S(0.142)DS(0.503)S(0.382)PT(0.107)R	10	3	0.13721				5240	0	0	0	0	0	0
sp|P07814|SYEP_HUMAN	882	sp|P07814|SYEP_HUMAN	sp|P07814|SYEP_HUMAN	>sp|P07814|SYEP_HUMAN Bifunctional glutamate/proline--tRNA ligase OS=Homo sapiens OX=9606 GN=EPRS PE=1 SV=5	0.873809	1.35e-07	56.856	2	S	KTGKEYIPGQPPLSQSSDSSPTRNSEPAGLE	X;X;X;X;X;X;X;X;X;X;X;X;X;X;X;Phospho (STY);X;X;Phospho (STY);X;X;X;X;X;X;X;X;X;X;X;X	XXXXPPPPPPPPPPPPPPPPPPPXXXXXXXX	EY(0.009)IPGQPPLS(0.061)QS(0.874)S(0.077)DS(0.438)S(0.407)PT(0.135)R	12	3	-0.38252			5239	5239	8788.1	13441	11451	7759.9	6792.2	6503.8
sp|P07814|SYEP_HUMAN	885	sp|P07814|SYEP_HUMAN	sp|P07814|SYEP_HUMAN	>sp|P07814|SYEP_HUMAN Bifunctional glutamate/proline--tRNA ligase OS=Homo sapiens OX=9606 GN=EPRS PE=1 SV=5	0.55981	3.05e-12	72.71	1;2	S	KEYIPGQPPLSQSSDSSPTRNSEPAGLETPE	X;X;X;X;X;X;X;X;X;X;Phospho (STY);X;Phospho (STY);X;X;Phospho (STY);X;X;X;X;X;X;X;X;X;X;X;X;X;X;X	XPPPPPPPPPPPPPPPPPPPXXXXXXXXXXX	EYIPGQPPLS(0.008)QS(0.023)S(0.008)DS(0.56)S(0.381)PT(0.021)R	15	2	-0.27495			5234;5240	5234	12587	21075	18727	11111	9906.7	8206.9
sp|P07814|SYEP_HUMAN	886	sp|P07814|SYEP_HUMAN	sp|P07814|SYEP_HUMAN	>sp|P07814|SYEP_HUMAN Bifunctional glutamate/proline--tRNA ligase OS=Homo sapiens OX=9606 GN=EPRS PE=1 SV=5	0.544873	8.29e-13	85.759	1	S	EYIPGQPPLSQSSDSSPTRNSEPAGLETPEA	X;X;X;X;X;X;X;X;X;X;X;X;X;X;X;Phospho (STY);X;X;X;X;X;X;X;X;X;X;X;X;X;X;X	PPPPPPPPPPPPPPPPPPPXXXXXXXXXXXX	EYIPGQPPLSQS(0.001)S(0.032)DS(0.211)S(0.545)PT(0.211)R	16	3	-0.55825			5237	5237	14775	23428	17777	10938	11468	9616
sp|P07900|HS90A_HUMAN	231	sp|P07900|HS90A_HUMAN	sp|P07900|HS90A_HUMAN	>sp|P07900|HS90A_HUMAN Heat shock protein HSP 90-alpha OS=Homo sapiens OX=9606 GN=HSP90AA1 PE=1 SV=5	1	1.34e-09	87.977	1	S	YPITLFVEKERDKEVSDDEAEEKEDKEEEKE	X;X;X;X;X;X;X;X;X;X;X;X;X;X;X;Phospho (STY);X;X;X;X;X;X;X;X;X;X;X;X;X;X;X	XXXXXXXXXPPPPPPPPPPPPPPXXXXXXXX	ERDKEVS(1)DDEAEEK	7	4	0.86415			2752;2753;2754;4656	4656	106690	145760	107690	69089	55536	49089
sp|P07900|HS90A_HUMAN	263	sp|P07900|HS90A_HUMAN	sp|P07900|HS90A_HUMAN	>sp|P07900|HS90A_HUMAN Heat shock protein HSP 90-alpha OS=Homo sapiens OX=9606 GN=HSP90AA1 PE=1 SV=5	1	1.17e-45	168.73	1	S	EEKESEDKPEIEDVGSDEEEEKKDGDKKKKK	X;X;X;X;X;X;X;X;X;X;X;X;X;X;X;Phospho (STY);X;X;X;X;X;X;X;X;X;X;X;X;X;X;X	XXXPPPPPPPPPPPPPPPPPPPPXXXXXXXX	ESEDKPEIEDVGS(1)DEEEEKK	13	4	-0.14808			4773;4774;4775;4776;4777;4778;4779;4780;4781;4782;4783;4784;4785;4786	4786	297150	452120	355930	189730	164310	149010
sp|P07910|HNRPC_HUMAN	299	sp|P07910|HNRPC_HUMAN	sp|P07910|HNRPC_HUMAN	>sp|P07910|HNRPC_HUMAN Heterogeneous nuclear ribonucleoproteins C1/C2 OS=Homo sapiens OX=9606 GN=HNRNPC PE=1 SV=4	0.999945	4.86e-28	117.76	1	S	KDDEKEAEEGEDDRDSANGEDDS________	X;X;X;X;X;X;X;X;X;X;X;X;X;X;X;Phospho (STY);X;X;X;X;X;X;X;X;X;X;X;X;X;X;X	XXXXXPPPPPPPPPPPPPPPPPPXXXXXXXX	EAEEGEDDRDS(1)ANGEDDS	11	3	-0.82617			3404;3405;3406	3404	11211	22424	18895	6062.8	5908.1	6236.2
sp|P07910|HNRPC_HUMAN	233	sp|P07910|HNRPC_HUMAN	sp|P07910|HNRPC_HUMAN	>sp|P07910|HNRPC_HUMAN Heterogeneous nuclear ribonucleoproteins C1/C2 OS=Homo sapiens OX=9606 GN=HNRNPC PE=1 SV=4	0.999997	7.09e-28	141.53	1	S	EKEQSKQAVEMKNDKSEEEQSSSSVKKDETN	X;X;X;X;X;X;X;X;X;X;X;X;X;X;X;Phospho (STY);X;X;X;X;X;X;X;X;X;X;X;X;X;X;X	XXXXXXXXXXXXPPPPPPPPPPPPPPXXXXX	NDKS(1)EEEQSSSSVK	4	2	-1.0119			11678;11679;11680;11683;11684;11685;11687;11688	11687	96135	161330	100070	66815	55667	48831
sp|P07910|HNRPC_HUMAN	239	sp|P07910|HNRPC_HUMAN	sp|P07910|HNRPC_HUMAN	>sp|P07910|HNRPC_HUMAN Heterogeneous nuclear ribonucleoproteins C1/C2 OS=Homo sapiens OX=9606 GN=HNRNPC PE=1 SV=4	0.576737	0.00572335	35.501	1	S	QAVEMKNDKSEEEQSSSSVKKDETNVKMESE	X;X;X;X;X;X;X;X;X;X;X;X;X;X;X;Phospho (STY);X;X;X;X;X;X;X;X;X;X;X;X;X;X;X	XXXXXXPPPPPPPPPPPPPPXXXXXXXXXXX	NDKS(0.002)EEEQS(0.209)S(0.577)S(0.163)S(0.049)VK	10	3	-0.28836			11682	11682	7989.4	14809	10190	6511.5	4405.5	4407.8
sp|P07910|HNRPC_HUMAN	240	sp|P07910|HNRPC_HUMAN	sp|P07910|HNRPC_HUMAN	>sp|P07910|HNRPC_HUMAN Heterogeneous nuclear ribonucleoproteins C1/C2 OS=Homo sapiens OX=9606 GN=HNRNPC PE=1 SV=4	0.493979	5.1e-09	74.794		S	AVEMKNDKSEEEQSSSSVKKDETNVKMESEG	X;X;X;X;X;X;X;X;X;X;X;X;X;X;X;Phospho (STY);X;X;X;X;X;X;X;X;X;X;X;X;X;X;X	XXXXXPPPPPPPPPPPPPPXXXXXXXXXXXX	NDKSEEEQS(0.001)S(0.011)S(0.494)S(0.494)VK	11	3	2.5304				11681	0	0	0	0	0	0
[truncated: 5,885 more rows]

## Sheet: Supplementary Table 4B
Accession	Gene Name	Proteins	Positions within proteins	Leading proteins	Protein	Fasta headers	Localization prob	PEP	Delta score	Number of Phospho (STY)	Amino acid	Sequence window	Modification window	Peptide window coverage	Phospho (STY) Probabilities	Position in peptide	Charge	Mass error [ppm]	Reverse	Potential contaminant	MS/MS IDs	Best localization MS/MS ID	Ca1	Ca2	Ca3	P1	P2	P3	P-value	log2(FC)
[truncated: 4,748 more rows]
