# Supplementary material for: Integrated multi-omics analysis for lung adenocarcinoma in Xuanwei, China
Source: Aging (Albany NY). 2023 Dec 13;15(23):14263–91. doi: 10.18632/aging.205300 (PMC10756121; doi:10.18632/aging.205300)
Supplement: Supplementary Table 5 [file aging-15-205300-s006.xlsx]

## Sheet: Sheet1
Supplementary Table 5. Comparative analysis of public datasets.
Sheet	Description
Supplementary Table 5A	The fold change of transcriptome among four LUAD datasets.
Supplementary Table 5B	The of fold change of proteome among four LUAD datasets.
Supplementary Table 5C	The of fold change of phosphoproteome among three LUAD datasets.

## Sheet: Supplementary Table 5A
gene	Our data	Zhang et al, 2017	Xu et al, 2020	TCGA
A4GALT	-0.940926	-0.391813	-0.425139	0.0189362
AAAS	0.153393	0.266661	0.151255	0.450085
AACS	0.144954	0.657313	0.548054	0.65914
AADAT	0.376945	-0.349538	0.118498	-0.0293591
AAGAB	0.0857476	0.556778	0.573749	0.485694
AAMP	0.338234	0.0736442	0.18262	0.38366
AARS	0.244572	0.895515	0.519059	0.569506
AARSD1	0.696572	0.420802	0.0250327	0.957856
AASDH	0.126084	-0.317385	0.57788	0.042385
AASDHPPT	0.152475	0.433641	0.659726	0.357998
AATF	0.338747	0.471446	0.337655	0.529481
ABCA10	-1.14152	-0.777346	-0.419567	-1.46595
ABCA13	2.56493	1.40711	1.99001	0.544816
ABCA2	0.0488744	-0.0215228	0.274339	0.289718
ABCA4	3.10791	2.10739	2.66276	3.72768
ABCA7	0.319804	-0.0560012	0.488857	0.597391
ABCA9	-1.59543	-0.234427	-1.74936	-1.83623
ABCB1	-0.732386	-2.0402	-1.32998	-1.67198
ABCB6	1.15241	0.64558	0.28624	2.03032
ABCB8	0.569939	0.0271494	0.0558749	0.377775
ABCC1	-0.199893	0.294798	0.373629	0.243598
ABCC10	0.412054	0.0968575	0.604167	0.701267
ABCC4	-0.620006	0.548528	0.395823	-0.0972003
ABCC5	0.082703	0.0505082	0.869328	0.715991
ABCC6	0.616059	-0.280091	-0.711186	-0.598519
ABCC9	-1.56169	-1.85311	-0.953853	-1.04105
ABCD1	0.0456823	0.575686	0.535991	0.331204
ABCD4	0.0914604	-0.377143	0.0433027	-0.0114096
ABCE1	0.0808712	0.259147	1.05432	0.532434
ABCF1	0.499953	0.0823336	0.614148	0.398657
ABCF3	-0.0972936	0.203027	0.0610098	0.286219
ABCG1	-0.792187	-0.845991	-0.330404	-1.397
ABHD10	-0.0986899	0.266241	0.508382	0.126658
ABHD11	0.935485	1.04723	0.290616	1.44542
ABHD12	-0.231593	0.191589	0.107756	0.469424
ABHD13	-0.547104	-0.810691	0.0971274	-0.496688
ABHD15	0.0313556	0.185148	0.183963	0.105936
ABHD16A	0.316021	0.0102079	0.257137	0.239631
ABHD2	0.0892397	-0.0220709	-0.0751146	-0.470994
ABHD3	0.297209	0.456801	0.584647	0.58798
ABHD4	0.318755	0.396395	0.434461	0.429608
ABHD5	-0.293115	-0.0926413	-0.406694	-0.896215
ABHD6	-0.713619	-0.694741	-0.677124	-1.28526
ABHD8	-0.230174	0.340309	-0.531244	-0.296807
ABI1	-0.150474	0.208831	0.422812	-0.0140863
ABI2	-0.560788	-0.986431	0.471591	-0.558714
ABI3	-0.772275	-0.488325	-0.0362904	-0.772765
ABLIM3	-0.650512	-1.40229	-1.89778	-1.40658
ABR	-0.14099	-0.4121	-0.262052	-0.34024
ABTB1	-0.610705	-0.827247	-1.38057	-0.695629
ACAA1	0.339482	0.108137	-0.569277	-0.332966
ACAA2	0.0455897	-0.0745229	-0.417618	-0.70891
ACACA	0.612532	0.325184	0.334264	-0.130168
ACAD10	-0.0948779	0.484476	-1.24214	0.450562
ACAD11	-0.343046	-0.0622632	-0.176374	-0.21302
ACAD8	0.465415	0.772842	1.26958	1.28911
ACAD9	-0.0625875	0.199227	0.39449	0.152845
ACADM	0.591571	-0.0413761	0.300511	-0.0988636
ACADS	0.289327	-0.207008	-0.675398	-0.229698
ACADSB	0.838504	0.522653	0.510134	-0.38652
ACADVL	0.231644	-0.0604999	-0.322962	0.197391
ACAP2	-0.393498	-0.512743	0.16663	-0.301265
ACAP3	0.227297	-0.00184733	-0.113914	0.928926
ACAT1	0.0554378	-0.506764	-0.559366	-0.492407
ACAT2	-0.310463	0.12475	0.0833002	-0.339065
ACBD4	0.14737	0.0998625	-0.311508	0.0625977
ACBD5	-0.108733	0.47769	0.293063	0.0702813
ACCS	-0.0403213	0.00180625	-0.442833	0.302976
ACD	-0.420426	0.12808	0.0533601	0.169483
ACE	-1.50474	-0.859658	-1.23757	-1.71339
ACER2	-0.389958	-0.0789675	0.83277	0.156621
ACER3	-0.54598	-0.64925	0.208355	-0.809599
ACHE	1.73107	2.17094	1.17677	2.48041
ACIN1	0.142536	0.250518	0.243457	0.359814
ACLY	0.0762029	0.214045	0.763023	0.454911
ACO1	0.121813	0.157136	0.274995	0.0570878
ACO2	0.143824	0.0278331	0.123881	-0.152279
ACOT1	0.400476	-0.119852	-0.0874146	-0.864323
ACOT11	0.304272	0.411631	1.0355	1.22485
ACOT13	0.79355	0.575371	0.363961	0.342773
ACOT4	0.618027	0.380397	0.418165	-0.0339364
ACOT7	-0.131211	0.637329	-0.0565394	0.196688
ACOT8	0.076475	0.596595	-0.174498	0.324858
ACOX1	0.0449055	-0.169682	0.0235627	0.0506946
ACOX2	0.328791	0.65374	0.0423354	0.0365886
ACOXL	-0.0793041	-2.2548	-0.521033	-1.92819
ACP1	0.129547	0.613144	0.796546	0.477886
ACP2	0.238676	0.279512	0.731177	0.208858
ACP5	-0.31137	-0.585466	-1.05049	-1.795
ACP6	0.880362	1.14407	1.21979	1.28758
ACPP	0.266218	0.141506	0.103559	-0.0964207
ACSF2	0.446907	0.0629846	-0.418112	-0.0221845
ACSL1	-0.534881	-0.333433	0.00614574	-0.932304
ACSL3	0.0163596	-0.166648	0.624914	0.234558
ACSL5	0.438575	-0.330316	0.614505	0.728434
ACSS1	-0.442621	-0.389753	-0.492986	-0.295536
ACSS2	-0.213711	-0.0492917	-0.294105	-0.638919
ACSS3	-2.09933	-2.04308	-1.50823	-1.64775
ACTG2	-1.5429	-1.78194	-1.57267	-1.26894
ACTL6A	0.269332	0.514794	0.882271	0.943894
ACTN1	-0.183576	-0.0982366	0.446352	0.168062
ACTN4	-0.112772	-0.371783	-0.113793	-0.33608
ACTR10	0.161207	0.0619569	0.0168518	-0.0230474
ACTR1A	-0.144433	-0.201933	-0.170877	-0.294752
ACTR2	-0.218893	-0.0296595	0.654654	0.0183785
ACTR3	-0.329342	0.212475	0.748101	0.234564
ACTR5	0.198485	0.573425	0.654311	0.746484
ACTR6	-0.107097	0.317719	0.0766808	0.124679
ACVR1B	0.424968	0.510552	0.452569	0.722538
ACVR2A	-0.102962	-0.160096	0.582991	-0.146549
ACVR2B	-0.399418	0.633333	0.460662	0.559426
ACYP1	-0.00729302	0.383062	-0.132764	0.459548
ADA	-0.337434	-0.220367	0.642149	0.897078
ADAM19	-0.703921	-0.0815095	0.616134	0.763622
ADAM33	-1.5365	-1.18781	-2.11995	-1.04849
ADAM9	0.188804	-0.247591	1.34292	0.519961
ADAMTS1	-0.949732	-2.37126	-2.03793	-2.36116
ADAMTS15	-0.936914	-1.82399	-2.24004	-1.50291
ADAMTS2	-0.464852	-1.41918	0.284431	0.739004
ADAMTS5	-0.949368	-0.76136	0.458255	0.306189
ADAMTS8	-1.57538	-4.79906	-4.45981	-3.51547
ADAMTS9	-0.498009	-1.3548	-0.864957	-0.854421
ADAMTSL2	0.2009	-1.16893	-0.808942	-0.55353
ADAMTSL3	-1.09785	-3.33663	-1.86125	-2.32905
ADAMTSL4	-0.506048	-1.6645	-1.61856	-1.84879
ADAP1	0.260184	0.246237	-0.124017	0.499966
ADAP2	0.0141592	-0.101924	0.559861	0.101835
ADAR	0.212992	0.256748	0.717967	0.536297
ADARB1	-1.32706	-1.3004	-1.33129	-1.79201
ADCK2	0.399071	-0.0481818	-0.486676	0.046906
ADCK5	0.416348	1.13583	0.718983	1.67569
ADCY1	0.417613	-0.338276	0.318958	0.120463
ADCY3	-0.305537	-0.967304	-0.156158	-0.0997457
ADCY4	-1.80561	-1.07263	-0.875666	-1.75761
ADCY6	0.178608	-0.00411308	-0.275672	-0.107017
ADCY7	-0.519319	-0.32604	0.352681	-0.397499
ADCY9	-0.086875	-0.547513	-0.554127	-1.16033
ADCYAP1	1.29069	-1.52293	-0.105611	-0.0123689
ADD1	-0.188065	-0.861831	-0.506158	-0.704548
ADD3	-0.340639	-0.600691	0.297151	-0.250098
ADI1	0.750872	0.09438	0.34362	0.0925649
ADIPOR1	0.539406	0.0184099	0.482665	0.134935
ADIPOR2	-0.557616	-0.646958	-0.863444	-0.628481
ADK	0.483932	0.691795	0.897684	0.43611
ADM2	2.4889	1.46306	3.4936	3.48502
ADNP	0.176724	0.00909055	0.622316	0.307261
ADNP2	0.101932	0.049622	0.34043	0.00886821
ADO	-0.106492	-0.0162859	0.123269	-0.141497
ADORA1	2.10849	0.879313	1.16148	1.11316
ADORA2B	1.29439	1.35874	1.05868	0.749602
ADPGK	-0.0852287	0.0180358	0.19387	-0.162334
ADPRH	-0.954117	-0.86847	-0.859662	-1.60957
ADRA2A	-0.189678	0.869463	0.0396457	1.4306
ADRA2C	-1.2655	-0.943719	-2.98298	-0.638918
ADRB1	-1.22294	-3.12741	-3.70578	-3.14974
ADRM1	0.264793	0.393694	0.377229	0.599136
ADSL	0.329695	-0.0613998	0.322194	0.461519
AEBP1	-0.0127889	-0.326439	0.377037	0.38773
AEBP2	-0.163821	0.0750173	-0.0861126	0.118557
AEN	-0.0244635	0.191011	0.428259	0.351257
AES	-0.167255	-0.457145	-1.17605	-0.484617
AFAP1	-0.0631465	-0.152748	0.69464	0.353449
AFAP1L1	-1.57033	-1.65796	-1.33518	-1.71974
AFAP1L2	-0.179537	-0.915809	0.377652	0.37169
AFF1	-0.137692	-0.42948	0.529015	-0.426167
AFF3	-0.636523	-1.91581	-2.37839	-2.39888
AFTPH	0.0981757	0.320718	0.714327	0.150749
AGA	0.538667	0.633335	0.871966	0.749364
AGAP1	0.0808617	0.0773574	0.072013	0.136541
AGAP2	-0.574481	-0.221687	0.217047	-0.103836
AGAP3	0.134265	-0.475942	-0.8589	-0.160358
AGBL5	0.126072	0.137559	0.1236	0.246707
AGER	-2.13611	-4.4443	-6.37318	-4.98393
AGFG2	0.744894	0.0490813	0.152099	0.0586133
AGGF1	0.289557	0.229418	0.268992	0.078398
AGK	0.514971	0.389329	0.849511	0.506547
AGL	0.365194	0.126623	0.619267	0.251177
AGPAT1	0.349608	0.137529	0.31241	0.099812
AGPAT2	0.366956	0.178418	-0.527034	0.194595
AGPAT3	-0.0894251	-0.0424542	0.453354	-0.0225518
AGPAT4	-0.717321	-1.36635	-0.672701	-1.16194
AGPAT5	0.147508	-0.442153	0.530409	0.616519
AGPS	-0.119852	-0.0786837	0.992178	0.00587466
AGRN	0.376115	-0.0223532	0.73851	0.58025
AGTPBP1	-0.764661	-1.04994	-0.803918	-1.27031
AGTR1	-1.45826	-3.94046	-2.71501	-1.81034
AGTR2	-5.34118	-2.23395	-2.87361	-3.00362
AGTRAP	0.525194	-0.100892	0.137805	0.274226
AHCYL1	0.517108	0.148257	0.848783	0.0563269
AHCYL2	0.888454	0.353616	-0.708787	-0.224465
AHDC1	0.419016	0.0494577	0.661817	0.607808
AHNAK	-1.14271	-1.77161	-2.07282	-1.98128
AHNAK2	-0.180211	0.170352	0.90226	2.16271
AHSA1	0.316037	0.569146	0.33395	0.496874
AIDA	0.503157	0.140034	0.333837	-0.0650013
AIF1	-0.192393	-0.0366607	-0.611114	-0.838968
AIF1L	0.353359	-0.563836	-0.237574	-0.384452
AIFM2	-0.0102199	0.225969	0.260897	0.785468
AIMP1	-0.0627176	0.52981	0.151907	0.224834
AIMP2	0.701282	0.744975	1.13576	1.05833
AIP	-0.0457617	-0.0740602	-0.560038	0.00763599
AK1	0.302608	-0.436163	-1.37974	-1.15108
AK7	0.0374024	0.42004	-1.17745	-1.34538
AKAP1	0.792036	0.220224	0.323226	0.473713
AKAP13	0.417933	-0.60245	-0.230978	-1.07133
AKAP14	0.953704	-0.213331	-0.736909	-2.07012
AKAP5	-0.0312355	-0.50121	-0.0519526	-0.799104
AKAP6	-0.155729	-0.395002	0.0504074	-0.569026
AKAP8	-0.053447	-0.11654	0.0162567	-0.029511
AKAP9	0.375274	-0.0174467	0.231492	-0.364151
AKIP1	0.274644	0.116691	0.323426	0.160972
AKIRIN2	-0.515546	-0.450645	-0.38872	-0.529993
AKR1A1	0.645912	0.239234	0.569502	0.384339
AKR1B1	-0.217994	-0.0629717	0.115161	0.263611
AKR1C3	0.405122	0.479892	-0.561746	2.14417
AKT1	0.155934	-0.041816	0.239163	-0.0945086
AKT2	-0.180383	-0.0918127	-0.0847501	0.206544
AKT3	-1.33857	-0.907712	-0.231265	-1.08781
ALAD	-0.0443211	0.131058	-0.127067	-0.312989
ALAS1	0.300659	-0.0167825	-0.15901	-0.515423
ALAS2	-2.8631	-4.46691	-0.208045	-4.15897
ALCAM	-0.17795	0.122726	0.515207	-0.510919
ALDH16A1	-0.113853	-0.244744	-0.46682	-0.150755
ALDH18A1	0.836247	1.21471	1.61922	1.61888
ALDH1A1	-0.666229	-1.71318	-1.35986	-1.09281
ALDH1B1	0.190788	0.410246	0.81601	1.06219
ALDH3A1	0.112318	-0.290717	-0.204804	1.92536
ALDH3A2	-0.105432	-0.285365	0.394432	-0.0460967
ALDH3B1	-0.336619	-0.202497	-1.71858	-0.803734
ALDH5A1	1.03481	0.192796	0.67393	0.0737422
ALDH7A1	0.374546	-0.417209	0.319675	0.213624
ALDOC	0.204076	0.4946	0.684779	0.777373
ALG10	-0.462456	1.03537	1.60009	0.7519
ALG10B	-0.221126	-0.0723847	1.11971	0.305439
ALG11	-0.18581	0.253541	-0.0488514	0.00748433
ALG12	0.786844	0.110804	0.426223	0.14743
ALG13	0.0259366	0.26686	0.411193	0.232834
ALG14	0.774405	0.10712	0.115943	0.137413
ALG2	0.155853	0.11639	0.317429	-0.0998336
ALG3	0.533424	1.00043	1.0354	1.12335
ALG5	0.062828	0.239595	0.39661	0.119505
ALG6	0.312485	0.380991	1.08602	0.682417
ALKBH1	0.16828	0.463359	0.675613	0.159698
ALKBH2	0.196285	0.133426	-0.150653	0.738684
ALKBH3	0.289315	0.223946	0.00880129	-0.133832
ALKBH8	0.00255398	-0.598785	0.370607	-0.0469525
ALMS1	-0.125255	-0.0587662	0.295136	-0.121956
ALOX15B	-0.440647	-1.37877	-0.760128	-0.711698
ALOX5	-0.460292	-1.60167	-0.879829	-1.84137
ALPK1	0.0385959	0.0691403	0.523265	-0.142266
ALPL	1.5663	-0.574502	-1.30085	-1.24155
ALPP	-2.24597	-1.61672	-1.95968	-1.30473
ALS2	-0.178075	0.195883	0.32404	-0.00860017
ALS2CL	-0.595848	-1.76914	-1.28886	-0.615862
AMBP	2.20034	-0.17504	0.307025	2.85998
AMBRA1	0.192831	0.405237	0.0306089	-0.00959573
AMD1	-0.272306	-0.124034	0.425306	-0.412928
AMFR	-0.460439	-0.0803715	-0.0692465	-0.169519
AMIGO2	-0.460566	-0.0565258	0.28413	0.621466
AMMECR1	0.687445	0.0791767	1.17876	0.640199
AMOTL1	-0.564432	-1.80233	-1.46178	-1.79502
AMPD3	-0.319188	0.997922	1.73454	0.708073
AMT	-0.0481147	-0.1704	-0.249086	0.241594
ANAPC11	0.497209	0.319957	0.128144	0.858675
ANAPC13	0.00992114	-0.0144352	0.310468	-0.0457059
ANAPC16	-0.0474895	-0.269436	-0.825178	-0.377826
ANAPC2	-0.0596184	0.184878	-0.0813784	0.065532
ANAPC4	-0.0212275	0.093155	0.163298	0.168787
ANAPC5	-0.175357	0.0494859	0.122733	0.343919
ANAPC7	-0.0853779	0.253196	0.469158	0.491022
ANGPT1	-1.29367	-2.65721	-2.42522	-2.3388
ANGPTL1	-1.78305	-2.91699	-3.11117	-2.60198
ANGPTL2	-0.689576	-0.617641	0.0777663	0.1861
ANGPTL7	-2.88505	-3.51017	-3.80011	-4.08561
ANKHD1	0.0897948	0.128207	0.216275	0.0376496
ANKIB1	0.0407846	0.457472	0.875138	0.557584
ANKLE2	-0.44981	-0.0516242	0.11022	0.347137
ANKRD11	-0.468547	0.0483554	-0.301744	-0.261964
ANKRD13A	-0.330911	0.121947	-0.0862061	-0.305179
ANKRD13C	0.151406	0.0173746	0.510962	0.123321
ANKRD13D	-0.107839	0.0492816	-0.0284585	0.641592
ANKRD17	0.0641891	-0.353207	0.74499	0.0748493
ANKRD22	1.06264	2.26394	2.72063	2.75972
ANKRD33B	-1.67049	0.0333337	-0.933592	-1.76072
ANKRD36	-0.0985457	0.374403	0.574159	0.575892
ANKRD36B	0.0237539	0.327881	0.0960997	0.638531
ANKRD37	0.275623	-0.367573	-0.86341	-0.406914
ANKRD40	-0.291357	-0.396057	-0.475663	-0.535528
ANKRD42	-0.179429	0.239218	-0.0133773	-0.253022
ANKRD44	-0.205561	-0.588721	-0.414579	-0.928751
ANKRD46	-0.636909	-0.67619	0.00103845	-0.293287
ANKRD49	-0.0610469	0.504594	1.07011	0.426518
ANKRD50	-0.309833	-0.390448	0.481457	-0.231094
ANKRD52	-0.019407	0.0863305	1.36057	0.492543
ANKRD6	-0.12313	0.0038719	-0.323418	-0.534162
ANKRD9	0.0284662	0.16384	-0.977776	-0.0325994
ANKS1A	-0.295511	-0.647115	-0.749967	-1.07235
ANKS3	0.539696	0.168347	-0.0912594	0.621372
ANKS4B	8.80874	0.65351	-0.680631	6.35845
ANKS6	0.714454	-0.0770793	0.147238	0.057655
ANKUB1	0.202416	-0.162412	0.836877	-1.57848
ANKZF1	0.180357	0.525528	0.238468	0.874568
ANLN	3.1273	3.08486	4.2228	3.76498
ANO10	0.15263	0.118418	0.141317	-0.076596
ANO5	-0.509095	-0.798538	-0.657895	-0.961733
ANO6	-0.950957	-0.831485	-0.607177	-1.00058
ANO9	0.508937	0.941636	0.908309	1.68872
ANP32A	-0.00522603	0.248112	0.00558876	0.0300891
ANP32B	0.02913	0.0579693	-0.187623	0.140538
ANP32E	1.18276	1.44237	1.2323	1.11733
ANPEP	1.56903	-1.29461	-0.211083	-0.449989
ANTXR1	-0.951636	-0.270082	0.123345	-0.261806
ANTXR2	-0.590389	-0.487804	0.524085	0.00400112
ANXA1	-0.335131	-0.624349	-0.974221	-0.398263
ANXA10	5.13092	0.984358	1.47508	5.72774
ANXA11	-0.260831	-0.462032	-0.37402	-0.235537
ANXA2	-0.156946	-0.134688	-0.584769	-0.350504
ANXA3	-1.2925	-1.76849	-1.99965	-1.89343
ANXA4	-0.213916	0.0653285	-0.204279	-0.306104
ANXA5	-0.0568427	-0.204416	0.168354	-0.459448
ANXA6	-0.425903	-0.777407	-0.419416	-0.708365
ANXA7	-0.0799441	0.172111	0.460918	0.0483224
AOX1	-1.23395	-2.42234	-1.96663	-1.24577
AP1AR	-0.198979	-0.105117	0.366922	0.145994
AP1B1	0.105172	0.0970325	0.69518	0.110965
AP1G2	0.464023	0.521118	0.471822	1.05201
AP1M1	-0.261869	-0.240015	-0.294841	-0.425551
AP1M2	1.00148	1.44814	0.685145	0.742184
AP1S1	1.21773	0.793707	0.340194	1.14296
AP2A1	0.0128303	-0.290081	0.19242	0.262337
AP2A2	0.468235	-0.590609	0.234013	-0.0410729
AP2B1	0.235102	0.0428804	0.954926	0.0883411
AP2M1	-0.0978222	-0.147888	0.323813	0.0322136
AP2S1	0.240622	0.108218	-0.369424	0.255327
AP3D1	0.284307	0.538919	0.375815	0.325141
AP3M2	-0.116424	0.192555	0.132074	0.152305
AP3S2	0.411679	0.396693	-0.235044	-0.185559
AP4B1	0.0452926	-0.0785134	0.226291	0.406533
AP4E1	-0.256624	0.0976734	0.370788	-0.209243
AP4S1	0.0324191	0.250076	-0.40266	0.0104374
APAF1	-0.0233904	-0.0802423	0.714087	-0.0356383
APBA1	0.486707	0.402845	0.785783	0.456463
APBB1	-0.388636	-0.715739	-1.40953	-1.36108
APBB1IP	-0.587349	-0.228599	-0.177681	-0.707935
APBB2	-0.719313	-0.99641	-0.847655	-1.06789
APBB3	-0.124153	-0.0523702	0.0171584	0.479631
APC	-0.0444705	-0.693871	0.236772	-0.75629
APEH	0.457105	0.501079	0.191024	0.20581
APEX1	0.716627	0.390006	0.720195	0.768902
APEX2	0.399403	0.516529	0.789305	0.529798
APH1A	0.562123	0.176606	0.453782	0.418109
APH1B	-0.397934	-0.414018	-0.591341	-0.974678
API5	0.0733621	0.40905	0.968815	0.112609
APIP	0.0454866	-0.164874	-0.0575882	-0.629836
APLN	-1.09133	-2.10708	-1.65365	-1.6153
APLNR	-1.02219	-0.877654	-0.00845057	-1.45258
APLP2	0.42835	-0.389453	-0.221876	-0.45571
APOBEC2	1.01276	0.924244	-0.0784671	0.453142
APOBEC3A	-3.24722	-2.09724	-0.700029	-1.29027
APOBEC3C	0.208912	-0.200658	0.596234	-0.0760541
APOBEC3F	0.032703	-0.0861918	0.427869	0.422402
APOD	0.100789	-1.61991	-0.783278	0.898936
APOE	-0.191723	-0.151281	0.0313199	-0.206227
APOH	2.05259	-1.52109	-0.337749	-0.275162
APOL4	-0.404062	-0.507138	0.0642387	-1.11946
APOLD1	-0.69189	-1.89893	-0.615452	-2.06156
APOO	0.694911	0.517003	0.674859	0.634915
APOOL	0.217216	1.05942	0.949102	0.109257
APP	-0.396265	-0.341078	0.165918	-0.184117
APPBP2	0.0199493	-0.45248	0.361576	-0.145667
APPL1	-0.34635	-0.0436492	0.926593	-0.314385
APPL2	-0.297397	-0.340151	0.265181	-0.0714125
APRT	0.269858	0.471396	0.583823	0.715277
AQP4	-0.457215	-2.79981	-3.24692	-2.9831
AQP5	2.45853	-0.555773	-0.303009	1.7206
AQP7	1.67158	-0.0330941	-0.69991	0.875908
AQP9	-0.852907	-1.84673	-1.12964	-1.63672
AQR	-0.01716	0.109664	0.511676	-0.0535142
AR	-0.624855	-1.89461	-0.989876	-0.699167
ARAF	0.275835	-0.1987	-0.0466725	-0.146071
ARAP1	-0.453986	-0.583394	-0.572864	-0.658973
ARAP2	-0.949988	-0.772239	-0.62614	-1.27318
ARAP3	-1.1006	-1.91611	-1.11931	-1.33586
ARC	-1.95954	-4.18379	-3.767	-3.41768
ARF1	0.569025	0.209283	0.42806	0.411938
ARF4	0.455363	0.154221	1.13291	0.434672
ARF5	0.691693	0.197833	-0.0221003	0.388168
ARFGAP1	0.231704	0.487493	0.512992	0.884939
ARFGAP3	0.225673	0.444739	0.339377	0.253093
ARFGEF1	0.0320376	0.523942	1.03411	0.536197
ARFGEF2	0.0269796	0.257726	0.844019	0.318033
ARFIP1	0.023696	-0.0596327	0.494376	0.105353
ARFIP2	0.352381	0.567954	0.121041	0.430483
ARFRP1	0.0913887	-0.142566	0.366428	0.322065
ARG2	-0.127913	0.566211	1.25903	1.15717
ARHGAP1	0.415234	0.197013	0.539231	0.281546
ARHGAP12	0.256758	0.667882	0.725292	0.385542
ARHGAP15	-0.567322	-0.630232	-0.000200565	-0.538137
ARHGAP20	-0.0396457	-1.0896	-0.139972	-0.326102
ARHGAP23	-1.05136	-0.523484	-0.845671	-1.08852
ARHGAP24	-0.210036	-1.29109	-1.20173	-1.41234
ARHGAP25	-1.02308	-0.632323	-0.473317	-0.982258
ARHGAP26	0.199797	0.324771	0.535914	0.563843
ARHGAP27	0.149988	-0.188295	-0.0578284	0.0509753
ARHGAP29	-0.844384	-1.35598	-0.69668	-1.20771
ARHGAP30	-0.759641	-0.653177	-0.50304	-1.15645
ARHGAP32	0.496394	0.260721	0.646633	0.555645
ARHGAP39	0.564528	1.46027	0.902773	1.02899
ARHGAP42	-0.337462	0.0879923	0.132377	0.280397
ARHGAP44	-0.129423	-1.48779	-1.6078	-1.63627
ARHGAP5	0.0108825	0.0336532	0.54095	-0.0377755
ARHGAP9	-0.738702	-0.415606	0.00585786	-0.0474242
ARHGDIA	-0.14875	-0.313365	-0.360876	-0.142229
ARHGEF1	-0.249114	0.020924	-0.343828	-0.0142152
ARHGEF11	0.243846	-0.0755875	0.282094	0.0873124
ARHGEF15	-1.80033	-0.468323	-2.2522	-2.42832
ARHGEF16	1.25928	1.55468	1.09025	1.78056
ARHGEF17	-0.0889297	-0.878435	-0.380372	-0.628089
ARHGEF19	2.02754	0.446373	1.43877	1.5788
ARHGEF25	-1.09205	-1.1838	-0.960787	-0.373973
ARHGEF26	-1.40689	-1.74513	-2.53895	-2.69131
ARHGEF37	-0.127029	-0.969778	-0.904066	-1.34491
ARHGEF38	0.778826	0.767239	0.743339	0.541468
ARHGEF5	0.495558	0.297602	0.0757098	0.188788
ARHGEF7	-0.233062	-0.0479732	0.107344	-0.1851
ARID1A	0.304485	0.181624	0.68718	0.216984
ARID1B	-0.204578	-0.108243	0.152224	-0.250549
ARID2	-0.09097	-0.0992042	0.523038	-0.00103009
ARID3A	-0.494656	0.183019	0.0783341	0.665846
ARID3B	-0.302595	0.0276834	0.122097	-0.0574209
ARID4A	-0.0486071	-0.0180021	0.362676	-0.643478
ARID5A	-1.30852	-1.13768	-0.584504	-1.07285
ARID5B	-0.15395	-0.586838	0.109331	-0.369216
ARIH1	0.173566	-0.128455	0.359902	-0.0175136
ARIH2	-0.185481	-0.0175331	-0.165499	-0.116329
ARL1	0.16998	0.0101946	0.467969	0.312234
ARL11	-0.37614	-0.650311	-0.289348	-0.881559
ARL13B	-0.245563	-0.858587	-0.279147	-1.11886
ARL16	0.277851	-0.0708152	-0.322201	0.706989
ARL2	-0.0557815	-0.310895	-0.51456	-0.304463
ARL3	-0.0180577	-1.11451	-0.349416	-0.114702
ARL4A	0.508848	0.36684	0.332063	-0.149057
ARL4D	0.455792	-0.733481	-0.863011	0.0228125
ARL5B	-0.215185	0.467478	0.100597	-0.0289449
ARL6	-0.726418	-0.121532	-0.45971	-0.897115
ARL6IP5	-0.097758	-0.078486	0.401744	-0.322976
ARL6IP6	-0.355065	-0.202312	0.367273	0.209109
ARL8A	0.100293	-0.195282	-0.369257	-0.066471
ARL8B	-0.146486	0.0601775	-0.0586984	-0.345502
ARMC2	-0.618693	-0.359281	-0.629459	-0.910005
ARMC3	0.176844	0.451724	0.00407515	-1.26038
ARMC4	-0.530552	-0.0362399	-1.05012	-1.61544
ARMC5	-0.501714	-0.0734206	-0.562055	-0.216749
ARMC6	0.231399	0.16471	-0.243804	0.207444
ARMC8	-0.199437	-0.370192	0.131981	-0.272309
ARMCX2	0.21414	0.170077	0.202567	0.0541775
ARMCX3	0.0625876	0.31456	1.4509	-0.0795931
ARMCX4	0.084546	-0.30297	-0.27207	-0.400682
ARMCX5	0.522723	0.597392	0.454478	0.43175
ARMCX6	0.657863	0.428846	0.54886	0.302528
ARNT2	-0.440422	0.785748	-0.976643	-0.556035
ARNTL	-0.37329	-0.258596	-0.112992	-0.293026
ARPC2	-0.313246	-0.222358	-0.137166	-0.410108
ARPC5	-0.168234	-0.361032	-0.088659	-0.322213
ARPP19	-0.204732	0.0952886	-0.131399	-0.437506
ARRB2	-0.393803	-0.518939	-0.653666	-0.912552
ARRDC1	0.0582531	0.504067	-0.122544	0.352466
ARRDC4	-0.538464	-1.22878	-0.72055	-1.1718
ARSA	0.178922	0.299678	0.280632	0.336551
ARSB	0.0866987	0.121513	0.201391	-0.318358
ARSI	-0.874459	-1.77446	-1.2498	-0.399977
ARSK	0.314353	-0.128697	0.18954	-0.228308
ARV1	0.763914	0.290951	0.568799	0.136949
ARVCF	-0.167668	-0.516706	-0.579519	0.152679
ASAP1	-0.923057	-0.747978	0.201866	-0.238355
ASAP2	-0.245681	-1.16164	0.489942	-0.124073
ASB1	-0.356964	-0.313119	-0.28385	-0.242036
ASB13	0.0190741	0.106901	-0.160514	-0.000185034
ASB3	-0.136695	0.0691405	0.490305	0.120474
ASB7	-0.146007	0.118425	0.402628	-0.06653
ASB8	-0.0487897	-0.0947653	-0.28164	-0.0402121
ASCC1	-0.21278	0.34609	0.265206	0.257689
ASCL2	-0.79041	-0.0184497	-1.23734	1.30274
ASF1A	0.445995	-0.156476	0.292265	-0.120417
ASF1B	2.17691	2.52935	2.50622	2.37657
ASH2L	0.0215223	-0.154374	0.226472	-0.052712
ASMTL	-0.0531863	-0.277619	-0.284655	-0.125105
ASNA1	0.24981	0.422001	-0.24157	-0.00989287
ASNSD1	0.114758	-0.0653323	-0.259035	-0.0593684
ASPA	-2.19467	-3.60592	-3.29811	-2.67852
ASPHD1	2.52558	1.03406	1.40275	2.77246
ASPM	2.24682	2.81493	4.0169	3.64382
ASPN	-0.413531	-0.433214	0.664495	0.663823
ASPSCR1	0.0575816	0.0159652	-0.225502	0.54976
ASRGL1	1.35024	-0.498409	-0.0281517	0.109582
ASS1	1.26428	0.23601	0.558064	0.848624
ASTE1	-0.218766	0.00901568	0.247922	-0.0595751
ASXL1	-0.0890933	0.665307	0.0789069	-0.0147673
ASXL2	-0.145457	0.369127	0.771404	-0.0151588
ASXL3	1.26074	-2.02997	-0.226551	0.0153864
ATAD2	0.513587	1.4508	1.90579	1.81579
ATAD2B	0.006675	0.393798	1.03726	0.498511
ATAT1	0.617188	0.479598	1.18469	1.28619
ATE1	-0.0973467	0.995658	0.043972	-0.256034
ATF1	-0.31952	-0.103784	0.0867514	-0.100297
ATF3	-1.15318	-1.51875	-1.66886	-1.75309
ATF4	-0.181085	-0.166864	-0.303543	-0.030453
ATF6	0.232022	0.316954	0.514889	0.0465158
ATF7IP	0.0693185	0.160152	0.941633	0.352475
ATF7IP2	0.335481	-0.328996	-0.776169	-0.0188425
ATG10	0.375413	0.0705373	-0.0546657	0.109792
ATG13	-0.0340927	0.236986	0.0483686	0.11654
ATG16L1	-0.0922389	0.334045	0.659961	0.639376
ATG16L2	-0.500277	-0.69687	-0.652159	0.0137467
ATG2B	-0.136131	-0.000679849	0.76787	-0.316718
ATG3	-0.0595411	0.0181868	0.259869	-0.0891043
ATG4B	-0.000647384	-0.21725	0.0182882	0.303838
ATG4C	-0.338325	-0.0248152	0.626848	-0.0322346
ATG4D	-0.0131752	0.475884	-0.284241	0.349533
ATG5	-0.327864	-0.0868343	0.166897	-0.04517
ATG7	-0.286433	-0.153666	-0.0434659	-0.342858
ATIC	0.614806	0.832137	1.05262	1.24191
ATL1	-0.398595	-0.475911	-0.0383979	-0.270274
ATM	-0.340133	-0.270197	1.29403	0.0568137
ATMIN	-0.0734594	0.237538	0.617806	0.263328
ATOH8	-0.979299	-0.695677	-3.68102	-1.51321
ATOX1	0.167831	0.287195	-0.664549	0.219701
ATP10D	-0.167818	-1.23343	0.470208	-0.489108
ATP11B	-0.222566	-0.262464	0.803519	0.0224662
ATP13A1	0.145932	0.659345	0.494254	0.504154
ATP13A2	0.484813	-0.0764478	0.473447	0.456718
ATP1A2	-0.930642	-3.38663	-2.09301	-2.30359
ATP1B1	1.34869	0.365441	1.13527	1.30689
ATP1B2	-0.73664	-2.22625	-1.45576	-1.54899
ATP1B3	-0.497152	-0.388437	-0.620583	-0.546619
ATP2B1	-0.566109	0.270205	0.155231	-0.348174
ATP2B4	0.124966	-0.407525	-0.13444	-0.582158
ATP2C1	0.16955	-0.394008	0.464733	-0.505831
ATP6AP1	0.0607903	0.107231	0.423867	-0.14419
ATP6AP2	-0.155863	-0.0881636	1.18529	-0.0563078
ATP6V0A1	0.314166	-0.313263	0.542061	-0.415067
ATP6V0A4	2.35451	2.01674	1.43125	2.02668
ATP6V0B	0.396589	-0.0365521	0.141399	0.0981432
ATP6V0D1	-0.036548	-0.23846	-0.166105	-0.568346
ATP6V0D2	-0.519542	-2.33671	1.27147	-1.48994
ATP6V0E1	0.301099	0.0478275	0.0917454	-0.0827406
ATP6V0E2	0.961409	0.748218	0.517324	0.536699
ATP6V1B2	-0.231643	-0.476993	-0.00801849	-0.643976
ATP6V1C1	-0.0675857	0.309958	0.729662	0.283247
ATP6V1F	0.328611	0.0185271	-0.0947922	-0.0147701
ATP6V1G1	-0.145763	0.0627085	0.23542	0.0911431
ATP6V1H	-0.133479	0.0896251	-0.0211135	-0.0448741
ATP7A	0.221683	0.173617	0.942576	-0.0159012
ATP8B1	0.252748	0.306005	0.408827	0.653598
ATP8B2	-0.206251	0.262752	0.447174	-0.0227159
ATP9A	0.448683	0.459384	1.82691	0.320133
ATP9B	0.226583	-0.28237	-0.115601	-0.425595
ATPAF2	-0.0942446	0.341332	0.405365	0.270119
ATR	0.11995	0.376479	0.970184	0.543862
ATRIP	0.128712	0.395805	-0.276768	0.168864
ATRN	-0.28557	0.0193197	0.433793	0.0193461
ATXN1	-0.173572	-0.425469	0.24066	-0.363301
ATXN2	-0.10247	-0.166761	0.252374	0.0314705
ATXN2L	0.218616	0.262069	0.707577	0.62002
ATXN3	-0.535789	-0.758943	-0.491957	-0.376024
ATXN7L3B	-0.176688	0.0350712	0.325442	0.0812394
AUP1	0.0954924	0.190959	0.371938	0.658814
AURKA	0.652363	2.04048	2.38912	2.64558
AURKAIP1	0.659706	0.383619	0.233623	0.622529
AUTS2	1.13482	-0.42071	0.791184	0.389032
AVL9	0.393592	1.26143	1.2267	1.02467
AVPI1	-0.506567	-0.178881	-1.34895	-0.523305
AXIN1	0.232722	0.391141	0.176949	0.55833
AXIN2	-0.37009	-0.91234	-0.725279	-0.848909
AXL	-0.291925	-0.946465	-0.63645	-0.995425
AZGP1	-0.216912	0.858591	0.18425	1.45728
AZI2	-0.354248	-0.245855	0.177883	-0.330246
B2M	-0.66642	-0.293362	0.251472	-0.831035
B3GALNT1	-0.905769	-1.87262	-0.843528	-1.31905
B3GALT4	0.125103	-0.275063	-0.507726	-0.257353
B3GALT6	0.462805	-0.128198	-0.69942	0.263234
B3GAT1	1.44852	-0.000137068	1.23284	2.27265
B3GNT2	-0.607506	-0.570855	-0.315076	-0.889388
B3GNT3	2.09841	3.67309	5.07317	4.39755
B3GNT5	-0.710529	-0.318012	-0.058342	-0.247659
B3GNT6	1.31867	3.23481	3.3704	5.71997
B4GALT2	0.89762	0.472248	0.638658	1.22821
B4GALT3	0.757592	0.393322	-0.0146277	0.990922
B4GALT4	0.146335	0.634023	0.78414	1.02117
B4GALT7	0.680457	0.72198	0.385639	0.717185
BAALC	-2.49858	-0.408838	-1.55321	-0.253449
BAAT	1.50484	2.16413	2.06088	1.80297
BABAM1	0.0644004	0.31904	-0.0682252	0.210649
BACE2	0.704547	0.0671545	0.915469	1.4507
BAD	0.517503	0.104596	-0.303692	-0.0110328
BAG2	-0.274502	-0.512572	-0.284581	0.549266
BAG3	-0.266297	0.0570759	-0.0546973	0.140361
BAG4	-0.00567298	0.233682	0.571097	0.288698
BAG5	-0.209466	-0.0497034	0.219724	-0.313977
BAG6	0.463625	0.101321	0.223232	0.28784
BAHCC1	0.591313	-0.200993	0.249448	0.160344
BAHD1	-0.132182	0.158597	0.173259	-0.273442
BAIAP2	-0.158626	-0.92549	-0.852104	-0.32747
BAIAP3	0.577372	0.275532	-0.032549	0.224695
BAK1	0.670051	0.266165	0.943867	0.786866
BANF1	0.308483	0.440546	0.625584	0.579516
BANK1	-0.313607	-0.220375	0.133596	-0.860919
BAP1	0.0330521	0.324413	-0.290309	-0.0653881
BARD1	0.270584	0.690622	1.5385	1.0867
BARX1	1.09519	3.52973	0.795951	7.58307
BASP1	-0.281105	0.777016	0.702463	1.80273
BATF	-0.415934	0.753672	0.836395	1.1351
BATF2	-0.87036	0.276753	-0.0818303	0.255464
BATF3	-1.04228	-0.362552	-1.00753	0.115945
BAX	0.151957	0.309983	-0.43689	0.271248
BAZ1A	-0.336887	0.542527	0.792777	0.465654
BBC3	-0.295716	0.156441	-0.15956	0.686044
BBIP1	-0.35061	-0.136521	0.0496952	-0.164507
BBS10	-0.371001	-0.270859	0.374646	-0.324115
BBS4	0.436037	-0.083061	0.0235943	-0.18421
BBS5	-0.109898	0.0219486	-0.406377	-0.245785
BBS9	0.149455	0.364083	0.646102	-0.0493821
BBX	-0.354515	-0.195955	0.762465	-0.232955
BCAM	-0.0048062	-0.114144	-0.691429	-0.304269
BCAP29	0.127485	-0.612977	0.0706848	-0.383208
BCAP31	0.233963	0.231794	0.366227	0.325384
BCAR1	-0.30212	-0.171598	-0.0973608	0.0609814
BCAR3	-0.507502	-0.253464	-0.397415	-0.114243
BCAS1	1.42745	0.720983	0.223461	2.19274
BCAS3	-0.129165	-0.710019	-0.317149	-0.435452
BCAT1	0.597347	0.0776211	1.29149	0.609879
BCAT2	0.371818	0.127401	-0.409819	0.0610168
BCCIP	0.161236	0.375579	0.285545	0.519719
BCDIN3D	0.286703	0.359992	0.267783	0.12387
BCHE	-1.29979	-3.36713	-2.673	-2.46594
BCKDHB	0.0677498	0.128073	0.251938	-0.00580516
BCKDK	0.454401	0.676901	0.979016	0.597513
BCL10	0.034292	-0.149305	0.205642	0.153051
BCL11B	-0.628279	0.0421091	0.684269	0.354435
BCL2	-0.398049	-0.390992	0.135376	-0.0387071
BCL2A1	-0.721404	-0.721532	-0.929893	-1.25347
BCL2L1	-0.281343	-0.334652	0.495087	-0.0704136
BCL2L13	0.155993	0.0261529	0.214637	-0.0254271
BCL6	-0.562661	-0.210796	-0.424051	-0.440057
BCL6B	-1.49653	-1.91406	-1.53605	-1.75678
BCL7A	0.589811	0.406459	0.356303	0.285006
BCL7C	0.245519	0.143199	-1.03264	0.372363
BCL9	1.06924	1.11575	1.27604	1.3146
BCL9L	-0.0551338	0.389804	0.794176	0.41699
BCLAF1	-0.0110169	0.0133563	0.227998	-0.113579
BCOR	0.308847	0.00498497	0.563183	0.149916
BCORL1	0.572277	-0.217884	0.517656	0.471728
BCR	0.353275	-0.245535	-0.0437586	0.351386
BCS1L	0.252706	0.131846	0.0419436	0.77056
BDP1	-0.0260386	-0.092056	0.360778	-0.145253
BECN1	0.280435	0.0684087	0.45906	0.20962
BEND3	1.12319	0.355317	0.919018	0.719099
BEND7	-0.294811	-1.22941	-0.373519	-0.660665
BET1	0.662546	0.135744	1.11955	0.969798
BET1L	0.393345	0.352295	0.341842	0.270294
BEX4	-0.021543	-0.730591	-0.672212	-0.923642
BEX5	-0.219255	0.0701489	-1.19399	-1.24416
BFAR	0.518448	0.0906766	0.286858	0.175559
BHLHA15	1.08242	0.867097	1.68107	2.91063
BHLHE41	-0.46736	-0.676523	-0.302377	-1.03899
BHMT2	0.353311	-1.0566	0.62384	2.86613
BICC1	1.1644	0.0406251	0.459612	0.200761
BICD1	-0.672409	-0.23413	0.800459	0.330326
BICD2	-0.446817	-0.44092	-0.162114	-0.613712
BIK	1.2874	1.62089	1.46255	2.01309
BIN1	0.110474	-0.193451	-0.241537	0.26791
BIN2	-0.845881	-0.881064	-0.289621	-0.837921
BIN3	-0.357814	-1.13319	-0.49384	-0.106463
BIRC3	-0.460624	0.250409	0.700612	0.291066
BIRC5	2.70382	2.60603	2.76471	3.69037
BIRC6	-0.0326785	-0.0421808	0.779046	0.207758
BIVM	-0.287115	-0.188287	0.12249	-0.361662
BLCAP	-0.156398	-0.0735677	-0.0916471	0.0153162
BLMH	0.236447	-0.295918	0.0568598	-0.0665816
BLOC1S2	-0.506193	-0.0984581	0.204128	-0.193264
BLZF1	0.182269	0.297077	0.84613	0.387784
BMF	0.295719	0.324859	1.11371	0.945384
BMP1	-0.316409	0.0363149	-0.363335	0.11617
BMP2	-1.01089	-1.40623	-2.6319	-1.77781
BMP2K	-0.291169	-0.0396354	1.08694	-0.202097
BMP3	-0.960055	-2.14337	0.111456	-0.0974198
BMP4	0.324077	-1.22281	-0.167897	0.0742756
BMP5	-0.914535	-0.722723	-2.02465	-0.956139
BMPER	-1.96394	-2.37415	-2.59221	-2.21749
BMPR1B	-1.73488	-0.31545	-0.709805	-0.262231
BMX	-1.22901	-2.92123	-2.12186	-1.76347
BNIP1	0.52577	0.332401	0.270206	0.364857
BNIP2	-0.913808	-0.72236	-0.559092	-0.923039
BNIP3	0.0114325	0.560033	0.511061	1.15787
BNIP3L	-0.0469252	-0.141958	0.0151855	-0.332147
BNIPL	-0.477008	-1.91363	-1.22991	-0.287656
BOD1	0.157987	0.334813	0.205075	0.325099
BOLA1	0.876764	0.842416	0.664952	0.971364
BOLA2B	-0.598221	0.867968	0.244405	1.04616
BOLA3	0.218317	0.576256	0.104392	0.917492
BPGM	0.388334	0.373558	0.499651	0.198768
BPHL	0.892818	0.744113	0.851896	1.27274
BPIFB1	1.05391	2.09973	0.513224	-0.268906
BPNT1	0.82596	0.613096	0.268937	0.689063
BPTF	-0.0031611	-0.294841	0.790435	0.10999
BRAT1	0.620383	0.398012	0.683507	0.757757
BRCA1	0.455783	1.31142	0.767568	1.43404
BRCC3	0.383629	0.977257	0.911444	0.733734
BRD1	0.122488	-0.158265	0.313938	0.0221885
BRD3	-0.26567	0.0464523	0.0789487	-0.106301
BRD8	0.410117	0.394233	0.314525	0.348983
BRDT	3.00538	1.08008	0.803885	6.0899
BRF1	0.132406	0.207352	0.0625581	0.346023
BRF2	0.213498	0.480444	0.152854	0.322803
BRI3	-0.00901747	0.040802	-1.78117	-0.537207
BRIX1	0.50646	0.670818	0.951492	1.22258
BRK1	0.155539	-0.0853942	-0.66799	-0.194398
BRMS1L	0.121546	0.0245403	1.34528	0.453467
BROX	0.385261	0.515781	0.658146	0.492292
BRPF1	-0.1878	-0.0834384	0.139926	-0.160145
BRSK1	1.35729	-0.0389574	1.29316	1.05497
BSCL2	0.534608	0.333342	-0.0685592	0.154304
BSG	0.0870204	0.243793	0.178631	0.244199
BSPRY	0.793559	1.1365	0.320634	0.970025
BTAF1	-0.217973	0.0411889	0.556464	0.168139
BTBD1	-0.111031	-0.0531424	0.47819	-0.149507
BTBD2	0.17799	0.338301	0.0359963	0.318306
BTBD3	-0.710747	-0.919709	-0.0108786	-0.428219
BTBD6	0.152833	0.189073	-0.0960229	0.303423
BTBD7	0.0662256	-0.0393682	0.3953	-0.0884196
BTBD8	-0.0668534	0.559815	0.223944	0.146906
BTBD9	0.847152	0.138182	0.10255	-0.138552
BTD	-0.136857	-0.499083	-0.254116	-0.544756
BTF3	0.408918	0.216744	0.055919	0.265854
BTF3L4	0.283145	0.0934263	0.816287	0.457907
BTG2	-0.0523213	-0.97914	-1.24572	-1.28962
BTG3	0.370801	-0.0426102	0.23368	-0.087564
BTK	-0.548869	-0.850308	-0.38653	-1.40849
BTNL9	-1.95347	-4.20538	-3.15997	-3.40942
BTRC	-0.0873755	-0.203273	0.138059	0.0609132
BUB1	1.46814	2.90493	3.31152	2.63591
BUB3	0.165018	0.512291	0.825901	0.667898
BUD31	0.362653	0.271197	0.0869336	0.465921
BVES	-1.66958	-2.09807	-0.741966	-0.909548
BYSL	0.717478	0.614603	0.917197	1.23871
BZW1	-0.0383177	0.200085	0.940832	0.671197
C10orf25	-1.39273	-2.21894	-1.29819	-1.23525
C10orf88	0.154932	0.0390679	0.423027	0.469642
C10orf95	0.248024	-0.153362	-1.80069	-0.565914
C11orf1	0.423365	1.05113	0.467399	0.47582
C11orf49	0.505049	0.283301	0.0289619	0.230149
C11orf54	0.489308	0.297058	0.272258	-0.257684
C11orf58	-0.0818004	-0.168458	0.00337315	-0.0510799
C11orf68	0.096854	-0.0365686	-0.422952	0.0223909
C11orf71	0.248228	0.516767	0.206316	0.0277859
C11orf74	0.355781	0.0438792	-0.353045	-0.325171
C11orf80	0.290929	1.34227	0.490165	1.42275
C11orf88	-0.270564	-1.7546	-2.34968	-2.44056
C12orf10	0.00923396	0.149098	-0.495524	0.243223
C12orf29	-0.286925	-0.239208	0.42267	0.0552061
C12orf4	-0.209955	-0.038026	0.521221	0.0225045
C12orf45	0.733027	0.704097	0.645406	0.975065
C12orf49	-0.729137	-1.04518	-1.38833	-1.06282
C12orf65	0.399009	0.57793	-0.00973142	0.348443
C12orf66	-0.158265	0.737159	0.779608	0.695971
C12orf75	-0.0203023	-0.154672	-0.343997	0.584603
C14orf132	-1.26717	-2.62851	-2.14949	-2.64817
C14orf28	-0.417404	-0.352023	-0.190334	-0.299976
C14orf93	0.242823	0.396248	0.125087	0.347274
C15orf39	-0.147724	-0.00644922	-0.00874655	0.15866
C15orf40	0.347355	0.521985	-0.113718	0.126635
C15orf61	0.314719	0.213531	-0.888231	-0.237315
C16orf58	0.526979	0.720898	0.549628	0.499705
C16orf74	0.624829	0.0262391	0.204486	1.70131
C16orf87	0.0220236	0.762397	0.778012	0.650427
C17orf107	0.508939	0.388979	0.265761	0.441109
C17orf67	-1.3419	-0.638029	-0.582537	0.188127
C17orf75	0.155504	0.687213	-0.0568778	0.53779
C17orf80	0.055874	0.17656	0.497056	0.366966
C17orf82	-0.564114	-0.9681	-1.70955	-0.798313
C18orf21	0.0168282	0.303487	0.322499	0.419265
C18orf25	-0.107862	-0.106403	0.433038	-0.0338513
C19orf38	-1.15386	-1.64009	-1.17541	-1.0591
C19orf44	0.385756	-0.00656604	-0.291366	-0.122142
C19orf48	0.889939	0.958288	0.24609	1.4724
C19orf54	-0.023189	0.350385	-0.183534	-0.393886
C19orf66	-0.34645	0.132207	-0.145261	0.0272676
C1D	-0.232299	0.100168	-0.203449	-0.151166
C1GALT1	0.76254	0.710149	0.958868	0.632227
C1GALT1C1	0.2647	0.60084	0.742889	0.517369
C1orf115	-0.830203	-1.73536	-2.24782	-1.57524
C1orf122	1.09376	0.268707	-0.497466	0.760378
C1orf123	-0.083133	-0.254702	-0.332253	-0.16554
C1orf131	0.654471	0.743726	1.10382	1.00725
C1orf174	0.260264	0.17735	0.328796	0.401442
C1orf21	0.224035	-1.45706	-0.969708	-1.10816
C1orf210	1.43682	0.245699	0.202525	0.433574
C1orf216	0.201724	-0.448724	-0.0462913	-0.0867047
C1orf35	0.768306	0.594485	0.13595	0.927829
C1orf43	0.472994	0.219129	0.29936	0.479954
C1orf50	0.269406	0.210983	0.192956	0.34219
C1orf52	0.0307217	-0.173441	0.0990561	0.0115808
C1orf53	1.91246	1.09539	1.50073	1.09659
C1orf56	1.13429	0.586447	0.677043	1.19791
C1orf74	0.842659	1.56005	1.37137	1.18828
C1orf87	-0.131086	-1.41482	-1.56483	-2.38568
C1QB	-0.535818	-0.5113	-0.00622015	-1.57945
C1QTNF1	-0.734851	-0.92724	-0.410685	-0.676044
C1QTNF2	-1.01406	-2.61067	-2.06302	-1.86461
C1QTNF7	-1.00111	-3.18142	-1.67912	-2.48203
C1R	0.178036	-0.25441	0.0493783	-0.00335028
C2	-0.959235	-0.559531	0.0325955	-0.854268
C20orf27	-0.202933	-0.161563	-0.45675	-0.131721
C20orf85	0.0668681	-1.18579	-2.75555	-2.23449
C20orf96	-0.29646	0.608745	0.0470458	-0.160992
C22orf46	0.548821	0.593404	0.250813	0.0998649
C2CD2	0.37975	0.0401139	0.223354	0.330274
C2CD2L	-0.265967	0.0118186	-0.0318392	-0.137697
C2CD4A	2.51213	3.87614	3.22295	4.10558
C2orf40	-0.940603	-3.43174	-3.32451	-2.52218
C2orf42	-0.218248	-0.0368402	0.753382	0.121916
C2orf49	-0.360212	0.313424	0.28367	0.090926
C2orf68	0.0251457	-0.0559899	0.282148	0.556796
C2orf69	-0.0307697	0.0115119	0.435131	-0.0233794
C3AR1	-0.484818	-0.436912	0.73323	-0.745823
C3orf33	0.0775641	0.330084	0.72545	0.221411
C3orf38	-0.37133	0.279712	0.591919	-0.0630069
C3orf52	0.221364	0.0563483	0.460962	-0.0147536
C3orf58	-0.720338	-1.03055	-0.343759	-1.00282
C3orf62	-0.365069	-0.0193651	-0.199429	-0.361242
C3orf80	1.13174	1.06287	0.658734	0.361432
C4BPA	1.30288	-1.19724	-1.41105	-0.871638
C4orf3	-0.457703	-0.437136	-1.24336	-0.663558
C4orf33	-0.200598	0.215819	0.385872	0.028961
C4orf46	-0.0173533	0.384597	0.837841	0.851043
C4orf48	1.24323	1.04757	-3.96037	1.64111
C5	0.356568	0.478554	-0.00921707	0.311537
C5orf22	0.319949	0.895637	0.920878	0.679644
C5orf30	0.279159	0.380259	0.33586	0.70914
C5orf38	0.353894	-0.304479	-2.58794	-1.09804
C5orf49	0.375664	-0.612917	-1.58431	-1.55704
C5orf51	0.0938521	0.40465	0.334742	0.532161
C5orf56	-0.563617	-0.513865	0.412214	-0.673324
C5orf63	0.907967	0.427776	0.777597	0.348862
C6	0.135115	-1.42442	-1.98918	-2.03208
C6orf106	0.242723	0.00137187	-0.147023	-0.230061
C6orf118	-0.409525	-1.22224	-1.12389	-2.00256
C6orf132	0.629417	-0.140715	-0.0678415	0.310931
C6orf136	0.435035	0.207406	0.0222853	0.752498
C6orf141	1.53488	1.25723	1.31413	1.93361
C6orf223	-1.71548	-0.132034	-0.259542	-0.0114821
C6orf226	0.269071	0.148423	-0.28293	-0.128411
C6orf47	0.552047	0.126855	-0.0308942	0.0662952
C6orf89	0.267506	0.0081886	0.541394	-0.172347
C7	-0.790001	-2.84645	-2.49922	-1.81471
C7orf25	0.169419	-0.0513191	0.409952	-0.0706214
C7orf26	0.140061	-0.0606837	-0.229008	0.0677363
C7orf43	0.461656	0.223898	0.439796	0.781481
C7orf50	0.8472	0.379277	0.184188	0.438697
C7orf57	0.89361	0.0310358	0.0895239	-0.752167
C8orf33	-0.320356	0.0691152	0.320877	0.390613
C8orf59	0.168468	0.687946	0.190279	0.771662
C8orf76	-0.155453	0.800388	0.459283	1.1421
C9orf116	0.421927	1.16603	-0.634501	-0.954749
C9orf135	-0.27717	1.22864	-0.577181	-0.634754
C9orf152	1.64888	0.520747	0.583422	0.292418
C9orf16	0.171173	0.374341	-0.0863269	0.33171
C9orf3	-0.243917	0.209208	-0.420088	0.0681274
C9orf40	0.328968	0.920485	0.504035	0.753259
C9orf72	-0.44587	-0.942053	-0.161549	-0.708452
C9orf85	0.0858235	-0.233139	-0.085266	-0.118812
CA10	4.17774	0.960572	2.38233	4.95627
CA11	-0.107056	0.852618	-0.825049	0.479384
CA2	0.938769	-1.35421	-1.65662	-1.50679
CA3	-1.24767	-2.35915	-2.28273	-2.14807
CAB39	-0.29386	-0.122518	0.209695	-0.112064
CAB39L	-1.35563	-1.23334	-1.10102	-1.39969
CABIN1	0.34965	-0.21157	-0.0172023	-0.0699462
CABLES1	-0.265809	-0.691199	-1.50903	-0.978437
CACNA1C	-0.893215	-1.26348	-1.03465	-0.796011
CACNA1D	-0.411513	-0.126067	-1.35226	-0.412924
CACNA1H	-1.21194	-0.695148	-0.831837	0.271571
CACNB1	1.39404	-0.563366	0.511605	0.653982
CACNB3	0.077642	0.236713	0.105867	1.17241
CACNG6	-1.45108	-0.753847	-1.79112	-1.50208
CACYBP	0.654318	0.401213	0.757414	0.863802
CAD	0.317557	0.608329	1.26538	1.11864
CADM1	-0.168498	-1.3815	-1.1445	-1.38516
CALCOCO1	-0.641477	-1.21561	-0.901022	-1.20297
CALD1	-1.16202	-0.680726	-0.140372	-0.561089
CALM1	-0.351172	-0.787381	-0.523059	-0.762253
CALM3	-0.11985	-0.252305	-0.682652	-0.0850326
CALR	0.567666	0.154894	1.02844	0.686918
CALU	0.507343	0.182853	2.22531	0.973835
CAMK1	0.136444	-0.675899	-0.60904	-0.337989
CAMK2G	0.0897743	-0.0268806	0.119459	0.122817
CAMKK1	0.498073	-0.764015	-0.522449	-0.0762297
CAMP	-0.216844	-2.68808	-2.75948	-2.62629
CAMSAP1	-0.225114	0.129342	0.243127	-0.0580348
CAMSAP2	0.126667	-0.258484	-0.0791077	-0.152022
CAMTA1	0.294585	-0.327951	0.0635304	0.0639877
CAND1	0.0344387	0.0603581	0.604279	0.561627
CAND2	0.375202	-0.733516	-0.417477	-0.330814
CANT1	0.756577	0.382255	1.15162	0.939765
CANX	0.515799	-0.235587	0.922518	0.333275
CAP1	0.0748396	-0.225824	0.804275	-0.0925232
CAP2	0.280428	-0.516496	0.00467402	-0.127246
CAPG	-0.105662	-0.316717	-0.0936515	-0.359427
CAPN1	0.375402	0.423867	0.342646	0.421104
CAPN10	-0.0129662	-0.215848	-0.0534268	0.577625
CAPN13	-0.190703	1.21801	0.793877	1.33106
CAPN2	0.604861	-0.0758773	0.0406098	-0.139758
CAPN5	0.29847	1.22183	1.07216	1.96223
CAPN7	-0.00551793	0.0876332	-0.117437	-0.212512
CAPNS1	-0.1141	-0.199246	-0.589735	-0.28323
CAPRIN1	0.424396	0.0267239	0.910484	0.401093
CAPRIN2	-0.443627	0.0494642	-0.143594	-0.0231315
CAPSL	-0.486406	-0.761759	-1.68091	-2.07833
CAPZA1	0.227708	-0.0074435	0.670091	0.22417
CAPZA2	-0.116731	-0.469325	0.227159	-0.257942
CAPZB	0.0490735	-0.837035	0.0960078	-0.00543413
CARD10	0.536638	-0.326762	0.024633	0.576832
CARD16	-0.61555	-0.490955	-1.34188	-1.31041
CARD6	-0.413256	-0.524107	-0.27186	-0.787338
CARD8	-0.65249	-0.59515	-0.217035	-0.650872
CARM1	-0.0555805	0.505324	0.900056	0.453196
CARS	-0.167772	0.304486	0.326834	0.495225
CARS2	-0.204378	-0.103647	-0.29173	0.0779474
CASC3	-0.217293	-0.265737	0.185932	-0.190293
CASC4	0.191327	0.078732	0.362315	-0.0178667
CASD1	0.247653	-0.10162	0.3945	-0.0614886
CASK	0.920168	0.423711	0.906659	0.487474
CASP1	-0.377633	-0.462973	-0.456958	-0.936199
CASP2	0.483268	-0.0689828	0.627127	0.557832
CASP3	-0.0411727	0.329051	0.783977	0.69013
CASP4	0.213801	0.00208385	0.227903	0.148099
CASP6	0.637419	0.368426	0.336974	0.953953
CASP7	-0.363414	-0.294814	0.233955	-0.195477
CASP8	-0.0978498	0.295498	0.397036	0.394937
CASP8AP2	-0.260281	0.125784	0.584005	0.0629739
CASQ2	-1.63652	-3.59947	-1.66126	-2.74149
CAST	-0.0830782	0.0827471	0.203306	-0.251749
CAT	-0.27313	-0.904987	-1.06676	-1.90384
CAV1	-2.1934	-2.26628	-3.45926	-3.4117
CAV2	-1.51951	-2.46546	-1.712	-2.35376
CBFA2T2	0.00491763	0.496412	0.52217	0.399179
CBFA2T3	-1.20194	-0.284363	-1.48448	-1.09694
CBFB	-0.0199218	0.295688	0.651637	0.348367
CBL	-0.557331	-0.213843	0.451183	-0.420297
CBLB	-0.128286	0.102932	0.607223	0.511054
CBLC	1.42583	3.46808	1.76376	3.23052
CBLL1	0.201507	-0.266087	0.221965	0.0259789
CBR3	0.140105	0.654879	0.139033	1.68981
CBR4	0.188762	0.204781	-0.0607497	0.173402
CBX1	0.38337	0.434161	0.528256	0.769348
CBX3	0.547903	0.557882	1.12091	1.04441
CBX6	0.156582	-0.605403	-0.529854	-0.617049
CBX7	-0.566374	-0.869941	-1.73607	-1.64744
CBX8	0.371615	0.797291	0.95117	1.35844
CBY1	0.334577	0.187295	-0.0254346	0.227846
CC2D2A	-0.0906335	-0.716808	-0.675789	-0.8877
CCAR1	-0.0334907	0.515291	0.608623	0.631645
CCBE1	-2.06799	-3.40198	-3.2686	-2.07801
CCDC102A	-0.162816	-0.478634	-1.32574	-0.340852
CCDC102B	-1.01185	-1.67566	-1.14636	-1.11064
CCDC103	0.277455	1.53483	-0.16996	-0.366458
CCDC107	0.123999	0.0504979	0.0220992	-0.0654908
CCDC113	0.150681	1.05612	0.129623	-0.678526
CCDC114	0.773271	0.527664	-0.576779	-1.07013
CCDC115	0.00650446	-0.435958	-0.51206	-0.28589
CCDC117	0.4003	0.774578	1.16369	0.174051
CCDC121	-0.134969	-0.0538872	0.0988385	-0.355431
CCDC124	-0.0153377	0.476481	-0.204162	0.204849
CCDC126	-0.204774	0.00894754	0.375752	-0.111742
CCDC127	0.240402	0.422883	0.425972	0.453588
CCDC134	0.654126	0.539899	0.878864	0.633059
CCDC137	0.188775	0.53073	0.715753	1.03476
CCDC14	0.0434422	0.368055	1.02647	0.625033
CCDC151	-0.104176	0.401999	-1.4736	-1.30476
CCDC153	-0.164475	0.0361639	-1.22449	-0.809198
CCDC159	-0.0127509	-0.254629	-0.223864	0.145082
CCDC167	0.855243	0.73261	0.597777	1.42577
CCDC22	0.0617788	0.336865	0.0635863	0.0106661
CCDC28A	0.0351916	-0.216684	-0.28063	-0.545398
CCDC3	-0.729051	-1.14549	-0.476873	-0.391706
CCDC43	0.173663	0.296544	0.586523	0.570526
CCDC50	-1.28243	-0.209617	-0.249661	-1.0571
CCDC51	0.123858	0.651014	0.130257	0.432479
CCDC57	0.437106	0.208055	0.0803613	0.578604
CCDC58	0.05677	0.818289	0.742024	1.012
CCDC59	-0.419583	0.137908	-0.0360062	0.107273
CCDC61	0.103657	-0.356227	-1.12767	-0.0703353
CCDC66	-0.116409	0.127393	0.114281	0.0583736
CCDC68	-1.12182	-2.08179	-1.28096	-1.10527
CCDC71	0.13993	0.0188005	-0.212258	-0.0933673
CCDC77	-0.492168	0.238468	0.289971	0.530959
CCDC78	-0.884166	-0.134676	-1.03179	-1.08267
CCDC8	-0.87533	-1.50187	-1.32734	-0.81401
CCDC80	-0.495236	-0.983672	-0.355011	-0.0955945
CCDC82	-0.555096	-0.282075	0.0758082	-0.284369
CCDC84	-0.316778	0.01611	-0.70201	0.186274
CCDC85B	-0.515407	-0.578655	-2.55241	-0.541485
CCDC85C	-0.233081	0.0337558	-0.231358	-0.277776
CCDC86	0.303635	0.474976	0.565438	0.880931
CCDC88A	-0.626496	-0.462145	0.388914	-0.594077
CCDC88B	-0.536637	-0.000494275	-0.465544	0.0452167
CCDC88C	0.127081	0.239998	0.345728	0.152194
CCDC91	-0.265093	-0.0740852	0.670192	-0.000429768
CCDC92	0.373494	-0.215696	-0.73923	-0.602725
CCDC93	-0.114389	-0.224472	0.485951	-0.12492
CCDC96	0.0338803	-0.0468545	-1.24444	-1.00379
CCDC97	0.101377	0.24314	0.28917	0.0616713
CCHCR1	1.17397	1.02721	0.738047	1.19224
CCL13	0.671118	-0.71635	1.05026	0.42371
CCL18	-0.0977271	-1.1946	-0.562403	-1.17934
CCL19	1.26258	0.238013	2.01157	1.12141
CCL2	-0.158233	-1.33342	-0.933011	-1.50491
CCL20	-1.24616	0.715865	0.685989	1.29172
CCL21	-0.690032	-1.09383	-1.822	-0.725069
CCL23	-0.0723339	-2.93338	-2.33642	-2.50432
CCL3	-1.05265	-0.68362	-0.192819	-0.649911
CCL8	-1.46283	-0.619263	0.692372	0.570796
CCM2	0.166198	0.355058	0.495349	0.74802
CCNA2	1.0379	2.25704	2.87277	2.89179
CCNB1	1.67972	2.12556	2.58063	2.9765
CCNB2	1.94553	2.54878	3.16521	3.05627
CCNC	-0.0169767	0.0933752	0.814931	0.21184
CCND1	-0.732245	0.59325	0.30113	-0.0964717
CCND3	-0.112821	-0.905134	-1.35468	-0.61226
CCNE1	1.80934	1.92885	2.76383	3.26043
CCNE2	0.679118	1.7011	2.50645	1.969
CCNF	1.20038	2.0827	1.94814	1.89691
CCNG1	0.0351708	-0.0594	0.465006	-0.138036
CCNG2	0.0151669	-0.145627	0.463232	0.399313
CCNJL	0.759424	0.0860125	0.281936	0.848271
CCNK	-0.0485163	0.322385	0.628703	0.112016
CCNL1	-0.841991	-0.543805	-0.393331	-0.418141
CCNT2	0.14347	-0.103377	0.13225	0.36633
CCNY	-0.513621	-0.408553	-0.336323	-0.186738
CCNYL1	0.170929	-0.17345	0.329182	-0.314537
CCP110	-0.0894328	0.303056	0.379706	-0.296786
CCR1	-0.804266	-0.671169	0.317596	-0.915221
CCR2	-0.150878	-0.641012	0.727195	-0.373316
CCR4	0.422664	0.296998	0.936546	0.192965
CCS	0.413522	0.304246	-0.137565	0.632824
CCT2	0.0778214	0.172365	0.53667	0.865652
CCT4	0.161124	0.292936	0.660379	0.5823
CCT5	0.286256	0.437365	1.04299	1.26078
CCT6A	0.515476	0.604359	1.21478	1.10371
CCT7	0.0938501	0.219867	0.12613	0.567916
CD109	-1.39439	-1.17941	0.395427	-0.0381117
CD151	0.305913	-0.272847	-0.443795	-0.175348
CD163L1	-0.425714	-0.715996	0.0306177	0.243239
CD164	-0.270215	0.157969	0.404662	-0.0478975
CD164L2	0.985474	0.12133	0.229923	-0.264276
CD180	0.448386	0.154542	2.32887	0.544173
CD1A	2.01067	0.183839	2.66843	1.54702
CD1E	1.10162	-1.46538	0.380256	-0.0727297
CD2	-0.484358	0.0267318	0.610691	0.110947
CD200R1	-0.44993	-0.182287	0.748028	-0.0395028
CD207	1.71411	-0.591167	1.67705	1.41801
CD209	-0.0197588	-0.755996	1.0793	0.284509
CD22	-0.829536	-0.890074	-0.289844	-0.675752
CD226	-1.16698	-0.118615	0.0578264	-0.492276
CD24	0.903157	1.27153	1.94763	1.44824
CD244	-1.01175	-1.45674	-1.31524	-1.35512
CD247	-1.59987	-0.422317	-0.6836	-0.620266
CD248	-0.582175	-0.916645	-0.0105258	0.0506346
CD27	0.440455	0.996017	0.310984	1.30331
CD274	-0.919176	-0.513037	0.0543891	-0.777749
CD276	0.665217	-0.220622	0.209636	0.608284
CD300A	-1.21238	-0.567426	0.00811873	-0.172319
CD300E	-1.3677	-1.65279	-1.38476	-1.4402
CD300LF	-0.154175	-1.57359	-0.847109	-1.7647
CD300LG	-2.40013	-2.38196	-4.03258	-4.92646
CD302	-0.0832	-1.53277	0.350757	-1.41277
CD320	0.28301	0.425466	-0.115155	0.560636
CD33	-0.667315	-1.24387	-0.319689	-1.46029
CD34	-0.672687	-1.77269	-1.19331	-1.65083
CD36	-2.1202	-2.94047	-3.10815	-2.89544
CD3E	-0.548639	-0.177185	0.147457	0.0760833
CD3G	-0.591217	0.221415	-0.0494708	0.0509703
CD4	-0.324731	-0.599173	0.119381	-0.856339
CD40	-0.169714	-0.0201318	0.0589308	-0.418541
CD40LG	-0.778763	-0.603034	0.0680996	-0.667629
CD44	0.391387	-0.344156	0.0881302	-1.03852
CD46	0.513128	0.782063	1.15341	0.617529
CD48	-0.868472	-0.358503	0.204026	-0.264833
CD5	-0.211379	0.115032	0.552368	0.0511232
CD53	-0.684039	-0.648264	0.560508	-1.04674
CD55	0.417426	-0.0379295	-0.878732	-0.459123
CD6	-0.635268	0.0976966	-0.188068	-0.00674885
CD69	-0.902046	-0.82896	-1.11783	-1.19067
CD7	-1.02875	0.117416	0.00632632	0.636471
CD72	-0.349295	0.329939	0.653924	0.486994
CD74	0.15056	-0.233315	0.230539	-0.7323
CD80	-0.330473	-0.264981	0.766594	-0.424828
CD81	-0.0272642	-0.31705	-0.878507	-0.856978
CD82	-0.110513	-0.66522	-0.32957	-0.625455
CD86	-0.462975	-0.566715	0.350269	-0.81367
CD8A	-0.861266	-0.152701	0.000910135	0.0426784
CD9	-0.294643	-0.589362	-0.582326	-0.665252
CD93	-1.55149	-2.1365	-1.18972	-2.23734
CD96	-0.350891	0.0573168	0.635161	0.321969
CD99	-0.816201	-0.883239	-0.371939	-0.047026
CD99L2	-0.243252	0.445139	-0.279001	-0.0222109
CDA	-0.440205	-0.56545	0.0268548	2.4633
CDADC1	-0.858286	-0.409067	-0.52735	-0.644791
CDC123	0.107448	0.109121	0.546745	0.548192
CDC14B	-0.216249	0.0569927	0.155352	-0.202439
CDC16	-0.159367	-0.0186388	0.0372312	0.00080477
CDC20	2.43018	2.47244	3.76103	3.79032
CDC23	0.337062	0.641087	0.72774	0.138591
CDC25B	-1.05978	0.573231	0.473011	0.528349
CDC26	-0.1818	0.288732	-0.303418	0.090347
CDC34	-0.0821169	0.346353	-0.430614	0.669755
CDC37L1	0.0949002	0.0502242	-0.0917844	-0.29637
CDC40	-0.284741	-0.12852	0.241185	-0.23754
CDC42EP1	1.07257	-0.193346	0.516274	0.297741
CDC42EP3	0.0520618	-0.421049	0.212087	0.26117
CDC42EP4	0.47735	-0.797317	-0.307412	-0.31666
CDC42EP5	-0.831398	-0.109849	-2.59226	0.489658
CDC42SE2	0.470404	0.597739	1.03368	0.21078
CDC5L	0.21873	-0.346942	0.678441	0.293751
CDC6	1.72836	0.32243	2.97614	3.42909
CDC73	0.15334	0.177456	0.582202	0.270483
CDCA4	0.393921	1.37126	1.391	1.44801
CDCA7	3.17045	2.83594	4.42261	2.9199
CDCA7L	1.09173	0.355515	0.781935	0.434733
CDCA8	1.16276	2.4345	3.39581	3.05913
CDH1	0.699006	0.697312	1.66067	0.981349
CDH13	-2.13502	-2.33127	-0.866661	-1.82368
CDH23	-1.31083	-1.44769	-1.63368	-1.29114
CDH24	0.474072	-0.602583	0.325431	1.55469
CDH3	0.858069	1.32207	2.66901	2.78537
CDH5	-1.91144	-2.38645	-1.93585	-2.53788
CDH6	-1.11013	-0.832777	-0.455202	-0.769107
CDHR3	-0.0650389	-0.957506	-1.93296	-1.46021
CDHR4	-0.615656	-0.578659	-1.79305	-1.60636
CDIPT	0.0293817	-0.185336	-0.6385	-0.137966
CDK1	1.47527	2.22755	2.32047	2.45299
CDK12	0.0340804	0.363087	0.949776	0.538454
CDK13	0.253119	0.0427228	0.567822	0.198015
CDK16	0.334036	0.0318548	0.305717	0.630794
CDK18	0.474826	0.0684299	0.0292229	0.0630993
CDK19	-0.239212	-0.06331	0.110937	-0.0524838
CDK2	-0.0110218	0.295959	0.477865	0.468493
CDK20	0.0407845	0.399743	-0.0842621	0.0269355
CDK2AP2	0.843099	0.447967	0.395017	0.714016
CDK5	0.85213	0.776802	0.730418	0.747592
CDK5RAP1	0.0273	0.462644	0.484326	0.61947
CDK6	-1.30699	-0.85806	-0.145606	-0.132494
CDK7	0.280182	0.67809	0.313176	0.606993
CDK8	-0.33178	0.0941701	0.368966	0.512651
CDKAL1	0.199959	0.0626801	0.427046	0.331527
CDKL5	-0.374379	-0.653083	-0.296811	-1.14098
CDKN1A	-1.06204	-1.46573	-0.921113	-0.926126
CDKN1B	-0.243641	-0.281735	0.3396	-0.167152
CDKN1C	-0.983699	-1.20032	-1.84833	-1.01662
CDKN2A	2.09021	2.31458	1.70817	3.5503
CDKN2AIP	-0.226722	-0.263062	0.943786	-0.245199
CDKN2B	-0.964921	-0.919401	-1.27493	-1.33072
CDKN2D	-1.04183	-0.158472	-0.914867	-0.322801
CDR2L	0.300204	-0.154524	-0.194552	0.410066
CDS1	0.762602	0.37182	0.365489	-0.162986
CDT1	2.14263	2.96911	2.50084	2.75317
CDYL	0.0606481	-0.0962838	0.606679	0.55289
CDYL2	-0.547273	0.0945633	0.799207	0.264295
CEACAM1	1.01062	1.68344	2.11524	2.06705
CEACAM4	-0.128846	-0.370044	-0.723415	-0.598141
CEACAM5	1.0404	2.80855	1.63098	4.79438
CEACAM8	0.724225	-0.252721	-0.35904	-2.11568
CEBPA	0.669877	-0.495591	-1.16022	-0.813018
CEBPG	-0.420382	-0.0549674	0.249965	0.108661
CEBPZ	-0.0212315	0.13643	0.101828	0.148684
CECR2	-0.361603	-0.214665	-0.752012	-0.0785889
CELF1	0.0603318	0.535745	0.269808	0.285293
CELSR1	0.541927	0.268639	0.370029	0.0534948
CELSR3	1.85234	2.43182	2.41262	3.37898
CENPF	2.28243	2.69539	3.8086	3.45101
CENPH	0.964482	1.27893	1.62005	1.42003
CENPO	0.25026	1.1478	0.552866	1.03704
CENPQ	0.169847	0.366876	0.52215	0.373352
CENPT	-0.346952	-0.458638	-0.239558	0.369209
CENPV	1.03578	-0.435709	-0.181826	0.603659
CEP120	-0.334291	0.23291	-0.000772562	-0.47318
CEP135	-0.669059	0.133973	0.460364	0.196721
CEP164	-0.242896	0.0316381	0.0790185	0.201723
CEP192	-0.0251773	0.164986	0.641649	0.269048
CEP250	0.171608	0.983542	0.502804	0.718484
CEP290	-0.201137	0.0794564	0.395341	0.0320379
CEP350	0.483099	0.472019	1.1272	0.458749
CEP41	0.481106	1.34553	0.747734	0.44566
CEP44	-0.270981	0.29395	0.358167	0.0540217
CEP55	1.85382	2.73425	3.66264	3.25092
CEP57	0.304177	0.450455	0.619355	0.11642
CEP63	-0.324261	0.216249	0.101614	-0.0612668
CEP68	-0.0691256	-0.646913	-0.152461	-0.341854
CEP72	0.540549	1.1678	1.17121	1.25277
CEP78	-0.275977	0.588934	0.490849	0.243347
CEP85	0.825252	0.532819	1.32298	1.0557
CEP89	-0.102247	0.488146	-0.0893567	0.2979
CEP95	-0.0216659	0.0135678	0.042389	0.610178
CEP97	0.00496808	0.789377	-0.07554	0.209064
CEPT1	-0.141494	-0.516954	0.415211	-0.358052
CERCAM	-0.438342	-0.00710238	0.99036	1.47141
CERS2	0.392901	0.302572	0.277545	-0.0175461
CERS4	0.103745	0.407769	-0.563228	-0.0812617
CERS5	-0.00855365	-0.152691	-0.154459	0.151996
CERS6	0.54743	0.897168	1.54012	0.911081
CES2	0.0558398	-0.0512551	0.126167	-0.310691
CES4A	0.486653	0.331201	0.31787	0.52887
CETN3	0.71306	0.364484	0.291395	0.0692064
CFDP1	-0.199035	-0.159606	-0.0194121	-0.133607
CFH	0.289627	-0.346959	0.283975	0.138652
CFL1	0.0806282	-0.106794	0.54904	0.252871
CFL2	-0.78422	-0.750407	-1.50049	-1.42458
CFLAR	-0.509323	-0.506644	-0.519779	-0.729239
CFTR	-2.03289	-2.02968	-1.35927	-1.29908
CGGBP1	-0.192279	-0.0372878	0.209199	-0.241641
CGN	0.256267	0.32503	-0.727989	0.0490446
CGNL1	-0.452439	-1.33628	-2.02569	-2.23507
CGRRF1	-0.327223	-0.0297595	0.00806021	-0.349311
CH25H	-0.975462	-1.78434	-0.836231	-0.65901
CHAF1A	0.325423	1.12773	0.607114	1.02637
CHAMP1	-0.0253403	0.174413	0.59453	-0.056367
CHCHD1	0.359355	0.450962	-0.200374	0.558895
CHCHD3	0.345542	0.380234	-0.374964	0.255473
CHCHD4	0.0460889	0.50362	-0.0615708	0.0869661
CHCHD7	-0.177414	0.254236	-0.531772	0.0530967
CHD7	-0.451944	0.392598	0.611786	0.685843
CHD8	0.183948	0.200036	0.454698	0.177838
CHD9	-0.259013	-0.245939	0.553617	-0.329324
CHDH	0.740758	0.214558	-0.0578262	0.366848
CHI3L1	0.800627	0.915981	1.2162	1.31669
CHIC1	-0.160116	0.147646	0.31209	-0.34981
CHID1	0.460055	0.122886	0.493352	0.553078
CHIT1	-0.911608	-1.49942	1.11138	-0.55257
CHL1	1.749	0.215636	1.28782	1.5251
CHM	-0.0816716	0.0316784	0.509194	-0.0680969
CHMP1A	0.00269391	0.161588	-0.134815	0.242685
CHMP2B	-0.0196007	0.203867	0.445819	-0.0667139
CHMP4C	0.453621	1.20602	0.693334	1.03224
CHMP6	0.204323	-0.166975	-0.362641	0.0278568
CHMP7	0.162883	-0.0199959	0.399937	0.0788681
CHN1	-1.13781	-1.63223	-0.603117	-0.635253
CHPF	0.469997	0.621019	0.885507	1.27242
CHPF2	0.408679	0.640418	0.534345	1.01744
CHPT1	-0.813783	-0.528831	-1.17324	-0.754291
CHRAC1	-0.0764516	-0.36537	0.374352	0.23341
CHRM1	-3.393	-3.82644	-2.20673	-4.42636
CHST10	0.227609	-0.0993472	-0.69946	-0.277553
CHST11	-0.817834	-0.288734	-0.0712759	-0.434217
CHST13	-0.279807	-0.0252901	-0.178994	0.00137977
CHST14	0.256494	-0.372232	-0.0991663	-0.24349
CHST15	-0.487826	-0.0520323	1.10672	0.998453
CHST2	-0.45352	0.270078	-0.544215	0.467352
CHST3	-0.472929	-0.704936	-0.179732	0.145921
CHST9	0.204715	-1.04244	-0.909658	-1.58912
CHTF18	0.431238	1.19134	0.925483	1.83003
CHTF8	0.16452	-0.00464266	0.222406	-0.0810772
CHURC1	-0.386701	-0.401984	-0.108712	-0.650716
CIAO1	0.104853	0.121394	0.456673	0.344142
CIAPIN1	-0.0440338	0.469759	0.139688	0.317559
CIB1	0.590888	0.602434	0.113609	0.566273
CIDEB	0.168953	-0.706912	-0.225839	-0.409025
CIITA	-0.034811	0.0506886	0.141647	-0.445367
CILP2	2.95483	2.35125	4.42343	3.51191
CINP	0.448524	0.492767	-0.219698	0.22563
CIRBP	0.0580627	0.204746	-0.845598	-0.549199
CISD1	0.129634	0.53389	0.587321	0.456235
CISD2	0.488183	0.317457	0.653952	0.699747
CISH	0.469432	-0.289645	-0.135408	-0.277925
CITED2	0.378301	-0.792397	-0.226928	-0.966162
CITED4	0.671407	-0.866336	-3.94655	-0.207724
CIZ1	-0.0976816	0.0242463	-0.0214463	0.0833896
CKAP2	0.260774	0.915345	1.81349	1.09162
CKAP4	0.632521	0.391474	1.01064	1.08566
CKAP5	0.221689	0.874287	1.15681	0.779304
CKB	0.301578	-1.13426	-1.30075	-0.206142
CKLF	-0.019223	0.323532	0.143365	0.739678
CKS1B	1.13578	1.10101	0.971972	1.74362
CLASP2	-0.295805	-0.296252	-0.178101	-0.568927
CLASRP	0.00710782	0.186364	-0.29895	0.563103
CLC	-1.35623	-1.4428	-1.89238	-1.3771
CLCA2	0.132682	0.789032	0.965705	-0.545429
CLCN3	0.285981	0.0621361	0.661947	0.113855
CLCN4	-0.198973	-1.07626	-0.726331	-0.904402
CLCN5	0.600412	0.305444	0.371084	-0.204739
CLCN6	-0.208882	-0.429014	0.121697	-0.400614
CLCN7	0.253315	0.647467	0.576172	0.48228
CLDN1	0.813043	0.943935	1.70093	0.895007
CLDN11	-1.07746	-1.84008	-1.30182	-1.25838
CLDN15	-0.147489	-0.193947	-0.449574	-0.122228
CLDN18	-2.47358	-4.59741	-3.50981	-3.63116
CLDN2	3.09338	0.633839	1.68847	2.93613
CLDN23	0.906156	-0.21391	-0.354679	-0.00364036
CLDN3	1.82214	1.79417	0.654238	2.03318
CLDN8	-0.45466	0.315616	0.143695	0.279153
CLDND1	-0.431771	-0.0736594	0.508971	-0.00527184
CLEC10A	-0.700353	-1.31627	-0.44865	-0.755037
CLEC12A	-0.386221	-2.35733	-1.07236	-1.86153
CLEC14A	-1.38644	-2.08046	-2.16425	-2.28011
CLEC16A	-0.0907408	0.264006	0.0523577	-0.162089
CLEC1A	-1.8025	-2.35265	-1.12279	-2.32025
CLEC4E	-2.15974	-1.23288	-1.75162	-1.68048
CLEC5A	0.626616	-0.11418	1.77739	0.469232
CLGN	0.933262	1.33203	1.56087	1.58873
CLIC3	0.043904	-1.84294	-3.02137	-1.76926
CLIC4	-0.418087	-0.623808	-0.148883	-0.867409
CLINT1	0.788889	0.164379	0.875248	0.234094
CLIP1	-0.276764	0.0532465	0.0839293	-0.0915208
CLIP2	-0.93837	-0.606988	-0.75752	-0.36193
CLIP3	-0.530591	-0.56193	0.219168	0.272195
CLIP4	-0.770243	-0.289648	0.1234	-0.599211
CLK1	-0.424423	-0.625284	0.05717	-0.0181854
CLK3	0.139461	-0.172019	-0.181506	0.0319334
CLMN	-0.342052	-0.361282	0.238669	0.0371229
CLN5	0.00774225	-0.587062	-0.0192864	-0.535928
CLN8	-0.782922	-0.947672	-0.935867	-0.562203
CLNS1A	0.349123	0.598275	0.594753	0.706674
CLPP	0.509461	0.400918	-0.0996569	0.147127
CLPTM1	0.010351	0.351169	0.244286	0.142754
CLPTM1L	0.779418	0.711609	0.692394	0.958817
CLPX	0.153197	0.318153	0.222753	0.149774
CLSPN	1.83674	2.32792	3.56817	2.70223
CLSTN2	-0.901743	-2.37155	-1.67348	-1.20485
CLTB	-0.120691	-0.104758	-0.355434	-0.0681051
CLTC	0.507414	-0.0847149	1.5754	0.533346
CLU	0.415179	-0.860748	-1.14208	-0.276273
CMA1	1.59078	-2.53211	-0.748746	-1.86672
CMAS	-0.110189	0.104908	0.589106	0.695301
CMPK1	0.246464	0.1042	0.965732	0.156929
CMTM3	-0.43544	-0.226621	-0.167804	0.267238
CMTM7	0.10173	-0.598253	0.0445454	-0.235436
CNDP2	-0.132066	-0.112049	-0.0634218	-0.112199
CNFN	1.72609	2.44173	0.875011	2.70837
CNIH4	0.562997	0.445931	0.44058	0.433685
CNKSR1	0.802907	0.809433	0.366051	0.696496
CNKSR3	-0.504979	-0.0752673	0.090921	-0.0101944
CNN1	-1.42459	-1.81682	-1.51454	-1.50217
CNN2	-0.330518	-0.299234	0.457152	-0.0690372
CNN3	0.038233	-0.522409	-0.146207	-0.687036
CNNM2	-0.210709	0.363872	-0.650673	-0.304983
CNNM3	0.27711	-0.0389365	-0.269157	-0.12334
CNNM4	0.0767024	0.0273271	0.273507	0.215414
CNOT10	0.015938	0.355831	0.202331	0.0239503
CNOT2	-0.0352326	0.234119	0.615675	0.384616
CNOT3	0.153274	0.127336	0.555174	0.385947
CNOT4	0.194053	-0.0909337	0.416698	-0.071852
CNOT8	-0.0261636	0.00763832	0.302462	-0.178518
CNPY4	0.139274	-0.578208	-0.283611	-0.0518677
CNR1	0.64684	-2.0607	-0.171249	-1.55679
CNRIP1	-0.982372	-1.8494	-0.890616	-1.49782
CNST	0.0119705	0.226532	0.102683	-0.135672
CNTN1	-1.99112	0.829774	-1.09361	-0.540538
CNTNAP1	-0.350714	-0.378617	0.148892	0.0396826
CNTRL	-0.341158	-0.196408	0.222834	-0.262949
CNTROB	-0.105096	-0.142013	-0.664736	-0.374444
COA5	-0.114924	0.467774	0.0392976	0.324702
COBL	0.200251	-0.734645	-1.36574	-1.11407
COBLL1	-0.483915	-0.371056	-0.107454	-0.896426
COG2	0.66106	0.605981	0.762864	0.732788
COG3	-0.1114	0.12685	0.268499	0.176383
COG4	-0.0277433	0.387813	0.359095	0.237532
COG6	-0.0961083	0.132329	0.738209	0.329668
COG7	0.0615775	0.459592	-0.10186	0.312526
COG8	-0.0659191	0.176975	-0.0370468	0.0587086
COIL	0.231374	0.12495	0.716611	0.533015
COL10A1	2.75325	3.7087	6.45479	4.58756
COL13A1	-1.13265	-2.50966	-2.13168	-1.31198
COL14A1	-0.301921	-1.64295	0.393065	-0.256617
COL15A1	0.153112	-0.471004	1.21387	0.654035
COL16A1	-0.184511	-0.0448793	0.135794	0.640029
COL17A1	4.56537	1.23889	4.05551	4.59347
COL1A1	1.24144	1.47766	3.42296	2.90685
COL21A1	0.244183	-0.681326	0.0353343	-0.222695
COL3A1	0.652615	0.753634	3.00574	2.49476
COL4A1	-0.485008	-0.455921	0.942054	0.0615556
COL4A3BP	0.21513	-0.202268	0.286634	-0.635898
COL5A1	0.328109	0.171232	1.8298	2.00257
COL5A2	-0.122195	0.52561	2.29271	2.13742
COL5A3	-1.23618	-1.35221	-0.652282	0.576173
COL6A1	-0.566402	-0.570624	0.28422	0.362398
COL6A2	-0.661799	-1.114	-0.251126	0.119335
COL6A5	-0.85338	-2.9589	-1.28273	-1.69567
COL8A1	0.27148	0.140355	0.361573	0.0288245
COL8A2	0.609174	0.00707926	1.0843	0.402246
COLEC10	-1.42734	-2.04646	-2.54027	-3.07574
COMMD1	0.0624824	0.135049	-0.297728	0.142419
COMMD10	0.158556	0.164047	0.496831	0.0707395
COMMD2	-0.503003	-0.0740911	-0.0736557	-0.457743
COMMD3	-0.127401	0.312299	0.329403	0.267055
COMMD4	0.64538	0.426725	-0.195435	0.344989
COMMD6	-0.163468	-0.28413	-0.672667	-0.131126
COMMD9	0.320772	0.085174	0.145032	-0.137564
COMP	2.07474	1.3789	4.22059	2.9007
COMTD1	-0.236916	0.510887	-0.387952	0.948561
COPA	0.616931	0.279888	0.922619	0.67521
COPB1	0.360148	0.304594	0.868964	0.394381
COPE	0.0835444	0.419287	0.364417	0.37563
COPG2	0.433186	0.120953	0.35544	0.460832
COPS2	0.0779236	0.156303	0.0223472	-0.160804
COPS3	-0.0414923	-0.0131735	0.119525	0.123901
COPS4	0.337976	-0.0882189	0.230564	-0.188304
COPS6	0.708102	0.276595	0.141354	0.616294
COPS7A	0.134796	-0.108032	0.0344558	0.0291836
COPS7B	0.131124	-0.0288649	0.618626	0.66756
COPS8	0.145495	-0.024403	0.415846	0.350515
COPZ1	0.292955	0.453992	0.125139	0.327937
COPZ2	-0.560156	-0.936598	-0.95097	-0.232867
COQ10A	0.257464	0.488316	-0.120856	0.0343264
COQ10B	-0.10864	-0.23277	-0.442486	-0.140107
COQ6	0.170664	0.419005	0.385468	0.522342
COQ7	-0.196768	-0.171541	-0.227731	-0.337189
COQ9	0.217292	0.529327	0.183756	0.609425
CORO2B	-1.56434	-2.86004	-2.44414	-2.16954
COTL1	-0.151943	-0.291226	-0.129903	-0.519579
COX10	0.0695311	0.189499	0.610205	0.291762
COX11	-0.0207679	0.386289	0.401631	0.204528
COX16	0.32733	0.177751	-0.196993	0.0711781
COX4I1	0.0182458	0.10529	-0.315333	0.151467
COX4I2	-1.01896	-2.62603	-2.7437	-2.25216
COX6B1	0.346058	0.197235	-0.426534	0.659882
COX6C	0.0813885	0.260759	-0.77104	0.652907
COX7A1	-1.23072	-1.79054	-3.90662	-1.91607
COX7A2	-0.157528	0.171813	-0.707316	0.287438
COX7A2L	0.121757	0.147698	0.263759	0.191378
COX7C	0.489595	0.0883835	-0.966828	0.201563
COX8A	0.285097	0.148945	-0.242638	0.252474
CP	0.564723	2.20297	4.22757	3.48312
CPAMD8	0.25835	-1.33851	-1.71387	-1.59442
CPB2	-0.122784	-3.3691	-4.29504	-2.67247
CPD	-0.206445	0.618783	1.28713	1.36119
CPE	-1.20397	-0.309409	-0.361101	1.00791
CPEB2	-0.563578	-0.316938	-0.303125	-0.500561
CPEB3	-0.00776296	-0.418567	0.331108	-0.630363
CPEB4	-0.234341	-0.0063609	1.03435	-0.5415
CPNE1	-0.194402	0.0961078	0.305932	0.623758
CPNE2	0.085588	-0.212655	-0.61858	-0.482316
CPNE3	-0.0286572	-0.154608	0.529791	-0.102933
CPNE8	-0.713224	-0.154434	0.394458	0.110611
CPSF1	-0.000967174	0.770365	0.723255	0.924612
CPSF2	0.195936	0.168399	0.781439	0.292858
CPSF3	0.232223	0.739133	0.969769	0.788038
CPSF4	0.640059	0.272611	0.501272	0.786022
CPSF6	0.072219	0.575636	0.748427	0.580861
CPSF7	0.128605	0.134893	0.25268	0.205825
CPT1B	0.896173	0.951145	0.0764497	1.95005
CPT2	0.586017	0.282661	0.521462	0.0565329
CPVL	-0.273518	-0.932392	0.142423	-0.867413
CPXM1	0.737799	0.154449	1.56092	2.0222
CPXM2	-0.379632	-1.10727	-0.298978	0.371885
CR1	-0.373444	-0.691352	0.63005	-0.662178
CRABP2	5.29946	1.05308	4.01441	5.59179
CRADD	-0.212693	-0.354483	-0.328172	-0.406629
CRBN	-0.701341	-0.00248312	-0.52793	-0.766293
CREB1	-0.175284	-0.568087	0.820354	-0.19316
CREB3	0.322633	0.349024	0.218618	0.229589
CREB3L4	1.53475	1.01851	0.991399	1.40281
CREB5	-0.207095	-1.5918	-0.456161	-0.656481
CREBBP	0.147444	-0.421178	0.463966	-0.0633973
CREBL2	-0.228407	-0.249011	0.0334764	-0.63038
CREG1	0.193395	-0.136026	0.219241	-0.342742
CRELD1	0.201464	0.0858984	-0.0554703	-0.107222
CRELD2	0.886967	0.352937	0.547648	1.09362
CREM	-0.660526	0.147366	-0.539032	-0.392164
CRIM1	-1.16122	-1.06777	-0.97206	-1.37312
CRIP2	-0.384548	-1.22731	-1.48475	-0.422021
CRIPT	-0.092035	0.555756	0.0704591	0.60533
CRISPLD1	0.515579	-0.298482	1.06329	0.884149
CRISPLD2	-0.809482	-1.64283	-0.858053	-0.743518
CRKL	0.0124687	0.180259	0.176863	-0.076456
CRLF1	-0.0833615	0.883495	1.44664	4.02851
CRNDE	0.33795	0.852773	0.853527	0.394417
CROCC	0.0532722	-0.176906	-0.651022	-0.173113
CROT	0.147973	0.23174	0.298886	0.00846289
CRTAP	0.135446	-1.31342	-0.737698	-0.688866
CRTC1	-0.040892	-0.415853	0.106439	-0.138491
CRTC2	0.184813	0.174716	-0.0914278	0.354058
CRTC3	-0.318965	-0.341114	-0.11508	-0.504292
CRY2	-0.267446	-0.69595	-0.802063	-1.16292
CRYBG3	-0.662343	-0.208729	0.886107	-0.342448
CRYL1	-0.383882	-0.41388	-0.454601	-0.438029
CRYM	1.67245	0.665035	0.748561	1.06938
CRYZL1	-0.227772	-0.00702691	-0.157374	-0.327073
CS	0.242145	0.0867907	0.380946	0.328257
CSDC2	-0.992436	-1.34504	-1.33609	-0.493366
CSDE1	0.050485	-0.163634	0.0174993	-0.322913
CSE1L	0.280339	0.396706	0.885618	0.705878
CSF1	-0.575175	-0.147	-0.255341	-0.515251
CSF1R	-0.224067	-0.207107	0.897227	-0.286146
CSF2	1.33349	-0.846023	-0.0635818	0.52022
CSF2RB	-0.817899	-0.329206	0.0525174	-1.02229
CSF3	-3.63267	-4.74506	-4.21486	-4.68373
CSF3R	-1.34583	-0.577322	-1.34354	-1.08214
CSGALNACT2	-0.475357	-0.430558	0.414563	-0.396393
CSK	-0.211088	-0.304977	0.138894	0.116801
CSNK1D	0.0548824	0.520483	0.0482579	0.264909
CSNK1G1	0.115678	0.280413	1.05832	0.0958491
CSNK1G2	-0.216917	0.208723	-0.22263	0.224587
CSNK1G3	0.0625912	0.0688196	0.467669	-0.0608756
CSNK2A1	-0.319782	0.265432	0.581214	0.391441
CSNK2A2	-0.331467	0.287014	0.0900246	-0.00796032
CSPG5	1.53834	0.765284	0.692523	0.409431
CSPP1	-0.51385	-0.0984043	-0.109486	-0.233434
CSRNP2	-0.210209	0.278951	0.513956	0.486812
CSRP1	-0.381325	-0.459959	-1.11055	-0.981244
CSRP2	-0.686535	-0.852592	-0.612767	-0.0444503
CST3	-0.0236197	-0.550349	-1.71675	-0.177445
CST6	-1.30037	-2.14341	-2.91273	-0.290802
CST7	-1.54444	-1.03801	-0.432752	-0.320301
CSTA	-0.398217	-1.25191	-1.57817	-0.996796
CSTB	0.142503	-0.0273228	-0.371888	0.32661
CSTF1	0.530589	0.556013	0.597513	0.376861
CSTF2	0.25109	1.25529	1.18117	1.09044
CSTF2T	-0.160927	0.0712962	0.314806	-0.11244
CSTF3	0.294492	0.648498	0.757374	0.594378
CTCF	-0.17578	0.0624015	0.403057	0.0389629
CTDP1	-0.228373	-0.369028	-0.384052	-0.125136
CTDSP1	-0.109227	-0.569622	-0.662131	-0.317826
CTDSPL2	0.110486	0.127071	0.621704	-0.109647
CTH	0.736661	0.642591	0.450408	1.13529
CTHRC1	-0.0106552	2.12294	3.73053	3.76687
CTIF	-0.828157	-1.13832	-0.541627	-1.20356
CTLA4	0.219646	0.848801	1.46774	0.988831
CTNNA1	0.249816	0.202778	0.363461	-0.0997534
CTNNAL1	-0.884227	-1.13861	-1.03903	-1.39779
CTNNB1	0.17327	0.185292	0.381263	0.187726
CTNNBL1	-0.173592	-0.0294812	-0.443567	-0.143651
CTNS	0.0673821	-0.247223	0.295521	0.034829
CTR9	0.0856244	0.0143604	0.568913	-0.0465807
CTSA	0.103747	0.349354	0.620481	0.631499
CTSB	0.0851763	-0.132739	0.724993	0.038934
CTSF	-0.386501	-0.770832	-1.03624	-0.514726
CTSG	0.204471	-1.55391	-1.5891	-1.85021
CTSH	0.776531	-0.464581	-0.776584	-0.867994
CTSW	-1.22075	-1.44925	-1.31338	-0.923023
CTSZ	-0.0908494	-0.109922	0.00733415	-0.326788
CTTN	0.354747	0.69688	0.942321	0.826924
CTTNBP2NL	-0.437471	-0.524248	-0.093688	-0.430092
CTU1	0.0305593	0.0692332	-2.87746	0.20836
CTU2	0.0952191	0.752269	0.580406	0.809964
CUEDC1	0.499291	0.135705	-0.0171335	0.312557
CUEDC2	0.0166012	0.20509	-0.380909	0.0933713
CUL1	0.165013	-0.018089	0.26765	0.00372308
CUL2	-0.114013	0.454976	0.769282	0.231641
CUL3	0.090675	-0.753285	0.291439	0.030327
CUL4A	-0.172846	0.0275859	0.675583	0.161312
CUL7	0.721174	0.417045	0.914356	0.832129
CUL9	0.298653	-0.0653498	0.311434	0.313972
CUX1	0.254718	-0.169486	-0.119908	-0.260713
CWC15	0.0887667	0.393991	0.125564	0.240424
CWC27	0.111986	0.154705	0.17835	0.073869
CX3CL1	-0.591476	-1.03456	-0.639623	-1.04862
CX3CR1	-1.31316	-1.73516	-0.626072	-1.56228
CXADR	0.429076	-0.100722	0.11385	-0.143306
CXCL1	-1.32871	-1.16386	-0.171901	-0.645289
CXCL10	-0.50316	0.837133	1.47569	0.938612
CXCL11	-1.15516	0.503861	0.58886	0.696919
CXCL12	-1.0394	-1.53608	-1.13224	-1.2854
CXCL13	3.73929	4.28988	4.88971	2.65236
CXCL16	-0.035626	-0.78772	-0.633931	-1.0516
CXCL3	-0.799934	-2.3715	-1.94496	-1.75171
CXCL5	-1.37006	0.0187615	-1.67868	-0.435887
CXCL6	0.365359	0.0672279	1.43289	1.16501
CXCL9	0.108941	1.28398	2.12986	1.31396
CXCR2	-1.64918	-1.49809	-2.58036	-2.63663
CXCR3	-0.218484	0.281329	0.955441	0.444896
CXCR4	-0.34695	-0.230906	0.585677	-0.0169972
CXCR6	-0.30241	-0.00492562	0.709566	-0.102005
CXorf21	0.020099	-0.464794	0.417827	-0.540768
CXorf38	-0.184801	-0.00984515	0.396296	-0.0102523
CXorf57	-0.977614	-1.42797	-1.4866	-1.7286
CXXC1	-0.0228954	0.0117728	-0.209463	0.199179
CXXC5	0.216951	0.0753454	0.0988439	0.61732
CYB561	0.518652	0.435817	0.230516	0.584621
CYB561D1	-0.542783	-0.54566	-0.259125	-0.516991
CYB561D2	0.550958	0.530465	0.37795	-0.44043
CYB561D2	0.550958	0.530465	0.37795	0.295823
CYB5A	0.271737	-0.319603	-1.3283	-1.01394
CYB5B	-0.0845961	-1.02384	-0.0790598	0.0652929
CYB5R3	-0.229883	-0.630785	-0.785686	-0.806574
CYB5R4	-0.70824	-0.307549	0.368159	-0.383209
CYBA	-0.435912	-0.215466	-0.725258	0.0779957
CYBB	-0.280308	-0.899223	0.473592	-1.41451
CYBRD1	-0.214996	-1.33336	-0.781643	-1.78094
CYC1	0.261157	0.518553	0.0118137	0.975044
CYFIP2	0.523522	0.0460005	0.141968	-0.292561
CYHR1	0.182065	0.418363	-0.143262	0.62878
CYLD	-0.679828	-0.284992	0.243761	-0.477462
CYP26B1	-2.13263	-1.04	-0.23154	-1.07886
CYP27A1	-0.276511	-1.25139	-1.39677	-1.70399
CYP2D6	2.69777	0.315704	1.20656	1.87542
CYP2F1	-0.76796	-0.643045	-1.24039	-2.21084
CYP2S1	0.090743	-0.0238744	-0.165282	0.224988
CYP2U1	-0.168218	-1.1005	-0.391967	-1.01485
CYP4B1	0.202031	-1.29806	-2.85965	-2.52442
CYSLTR1	0.495257	-0.110502	0.332297	-0.664876
CYTH1	-0.552622	-0.339016	-0.41095	-0.571055
CYTH3	0.653286	-0.461006	0.14755	0.0869084
CYTH4	-0.85045	-0.377613	0.179072	-0.305457
CYYR1	-1.55759	-2.32831	-1.65183	-2.27649
D2HGDH	0.255659	0.305152	-0.237656	0.849908
DAAM1	-0.211183	-0.117079	0.636856	-0.283673
DAAM2	0.471354	-1.02808	-0.929181	-0.9244
DAB2IP	-0.882169	-0.380849	-1.11289	-1.07419
DACH1	-1.99915	-3.35287	-2.20044	-2.50615
DACT1	-0.675412	-1.02286	0.194217	0.222247
DACT2	-0.487642	-0.512946	-0.59766	0.643119
DACT3	-0.960719	-1.54848	-1.87369	-0.947432
DAD1	0.255509	0.0579557	0.0931938	0.300264
DAG1	0.224501	-0.218874	-0.182483	-0.0909376
DAGLA	0.131919	-0.0658678	-0.080982	0.128475
DAGLB	0.575802	0.140097	0.863562	0.328766
DALRD3	0.288492	0.329175	-0.232237	0.127458
DAP	1.20383	0.609232	1.21282	0.98154
DAPK1	0.0152499	-0.104434	-0.581113	-1.0952
DAPK3	-0.426851	0.0450059	-0.39445	-0.317268
DARS	-0.104579	0.0271735	0.74874	0.599385
DARS2	0.697366	1.14508	1.49723	1.20337
DAXX	0.426928	0.120115	0.113153	0.260871
DAZAP1	0.0411827	0.0529779	0.21682	0.367829
DAZAP2	-0.172487	-0.118263	-0.375267	-0.395008
DBF4	0.660816	1.0405	1.35488	1.38442
DBI	0.56202	-0.133487	-0.527346	-0.615233
DBN1	0.479388	-0.00826751	0.421724	1.16593
DBNDD1	0.702126	2.25783	1.26009	2.00095
DBR1	-0.0716231	-0.0306073	0.304367	-0.167854
DBT	0.183769	0.185012	0.00707986	-0.138987
DCAF10	0.0474786	-0.00761079	0.292379	0.0608378
DCAF11	0.137713	0.233952	-0.097927	-0.207613
DCAF12	0.693691	0.622017	1.15262	0.749547
DCAF13	0.135119	0.774083	1.09817	1.31802
DCAF17	-0.064435	-0.0157906	1.28589	0.36083
DCAF4	0.548186	0.104724	0.824091	0.656292
DCAF6	0.581608	0.158037	0.32743	-0.00341914
DCAF7	0.016162	-0.0117998	0.31234	0.0282554
DCAKD	0.249964	0.060609	0.480014	0.221162
DCBLD1	0.378145	0.197423	0.911596	0.753778
DCDC2	-1.19135	-1.49767	-2.0607	-1.27547
DCHS1	-0.964824	-1.55001	-0.735179	-1.03457
DCLK1	0.489344	-0.0832922	0.995669	1.14088
DCLK2	-0.460089	-1.41106	-0.434123	-0.358515
DCLRE1A	0.120945	0.824478	0.929566	0.568928
DCLRE1B	-0.286987	-0.404055	0.39254	0.0670788
DCLRE1C	-0.0729802	0.275385	0.445314	0.317695
DCN	-1.07831	-1.12104	-1.47348	-1.49706
DCP2	-0.192224	-0.27497	0.19616	-0.147227
DCTN2	-0.217458	0.0180609	-0.132913	0.174375
DCTN3	0.183034	-0.236868	-0.55301	-0.332587
DCTN4	0.0263856	0.1426	0.714715	-0.239865
DCTN5	-0.0701162	0.347996	0.22887	0.333438
DCTPP1	0.4533	0.301248	0.537921	0.863761
DCUN1D4	0.0841054	-0.0952698	0.657931	0.254988
DCUN1D5	-0.270013	0.52941	0.709924	0.85403
DCXR	0.191229	0.0151413	-0.452577	0.220268
DDA1	-0.262034	0.419001	-0.0254416	-0.000102699
DDAH1	1.02292	-0.240306	0.112256	-0.170778
DDAH2	0.0413566	-0.435439	0.158415	-0.285729
DDB1	0.270344	0.274343	0.50426	0.305634
DDB2	-0.366871	0.343444	0.167507	-0.0827128
DDHD2	-0.540719	-0.198019	0.0120744	0.0114016
DDIT3	-0.237164	0.375112	-0.357903	0.725419
DDIT4L	1.58738	1.77936	2.25904	3.30252
DDO	-0.842776	-1.24349	-0.648776	-1.31126
DDR1	1.06912	0.501144	0.641258	0.81611
DDR2	-1.2525	-1.40525	-0.341321	-1.19241
DDRGK1	-0.252618	0.576066	-0.0503411	-0.0469073
DDX1	0.0427419	0.130795	0.143478	0.222827
DDX10	0.115945	0.02765	0.459014	0.56976
DDX18	0.0662509	-0.00922716	0.471136	0.307872
DDX19B	-0.0770706	0.341885	0.103446	-0.121129
DDX21	-0.124282	-0.190527	0.61052	0.125872
DDX23	0.0541314	0.126436	0.207941	0.445398
DDX24	0.141109	0.0320648	0.0427474	-0.315676
DDX27	0.219329	0.298019	0.381383	0.697516
DDX28	-0.0957074	0.393361	0.162366	-0.0128758
DDX31	0.27183	0.769105	0.665308	0.257733
DDX39A	0.0193805	0.558525	0.12765	0.956545
DDX39B	0.236328	0.218367	0.0610357	0.738209
DDX3X	-0.306385	-0.659337	-0.0555143	-0.502568
DDX41	0.3693	0.654908	0.317045	0.616428
DDX42	0.147575	-0.0406629	0.809733	0.32877
DDX46	0.306435	-0.269855	0.589624	0.126055
DDX49	0.243928	0.413705	0.25135	0.417028
DDX50	-0.100164	0.170171	-0.176118	0.0385003
DDX51	-0.0434117	-0.175419	-0.386045	0.27764
DDX54	0.218071	0.285419	0.214527	0.507809
DDX55	0.203415	0.629975	0.522622	0.866481
DDX59	0.193795	0.0556441	0.198183	0.143935
DECR1	-0.155443	-0.126037	-0.352246	-0.128076
DEDD	0.120799	0.041827	-0.230625	0.22566
DEDD2	-0.170814	0.0782464	-0.168478	0.0474175
DEF6	0.125864	0.190282	0.565713	0.526673
DEF8	-0.527719	0.525017	-0.259053	-0.0946822
DEFB1	0.345369	-0.347987	-2.66687	1.24019
DEGS1	0.292685	-0.0720198	0.500972	-0.273522
DEGS2	0.877491	0.580775	0.264856	0.488909
DENND1A	-0.767996	-0.156349	0.363295	0.498936
DENND3	-1.47503	-0.807337	-1.80092	-1.78449
DENND4B	-0.0540314	-0.0604082	0.187386	0.251153
DENND4C	-0.323307	-0.435667	-0.0304081	-0.656267
DENND5A	-0.13192	-0.35991	-0.265251	-0.788828
DENR	0.20726	0.234016	0.554071	0.667298
DEPDC5	0.0565818	0.277206	0.324003	0.248209
DEPTOR	1.55049	1.07847	2.49935	1.52232
DERA	-0.128995	0.00675509	0.234777	0.285145
DERL1	-0.299756	0.0996357	0.567833	0.1818
DERL2	-0.0828555	0.294623	0.185856	0.323554
DERL3	0.80223	0.449417	2.548	2.2362
DES	-1.67169	-3.44873	-4.06774	-3.03906
DFFB	0.313274	0.0737175	0.794279	0.466783
DGAT1	0.280949	0.27601	0.176282	0.934957
DGAT2	1.3051	0.0673082	0.417002	0.883851
DGCR6L	0.638426	0.338053	0.141688	0.130339
DGCR8	-0.0121001	0.128539	0.200831	0.268302
DGKA	-0.266368	0.482395	0.722319	0.985865
DGKE	-1.18507	-0.64096	-0.202289	-0.46087
DGKH	-0.916612	-0.547553	-0.407558	-0.610167
DGKZ	-0.341373	-0.0735053	0.0548899	0.226428
DGUOK	-0.0325457	0.215143	-0.182453	0.549346
DHCR7	0.68312	0.633995	0.299636	0.179753
DHDDS	0.501044	0.296243	0.555386	0.349107
DHFR	1.09269	1.39815	1.19058	0.898243
DHODH	0.38556	0.372559	-0.173447	0.190821
DHRS1	0.296455	-0.0326344	0.203105	-0.114794
DHRS11	0.736268	0.436823	0.395407	1.08091
DHRS13	0.740234	0.952938	0.558863	1.17444
DHRS3	-0.0749553	-0.266216	-0.458749	-0.287006
DHRS7	0.616584	0.0498323	0.387496	0.166813
DHRS7B	0.131697	-0.056051	-0.379386	-0.153928
DHRS9	-1.03062	-0.596858	0.297884	0.550607
DHTKD1	0.710206	0.711203	0.887298	1.03011
DHX15	0.299429	0.0773075	0.820157	0.37
DHX16	0.336331	0.178299	0.402737	0.382122
DHX30	0.0424531	-0.0137415	-0.122642	0.034078
DHX34	0.0724042	0.143671	0.4087	0.981882
DHX35	0.00598936	0.000408415	0.651201	0.224422
DHX36	-0.227541	0.242601	0.468471	0.0557781
DHX38	-0.29024	-0.146902	-0.0945367	-0.0400508
DHX40	0.271739	0.405243	0.699418	0.391299
DHX8	0.0237109	0.168923	0.520878	0.222114
DHX9	0.359244	0.211596	0.532914	0.291729
DIABLO	-0.00724716	0.0759055	0.311915	0.552703
DIAPH1	0.166987	0.189106	0.0986641	-0.256885
DIAPH2	-0.0423533	-0.903136	-0.304027	-1.01868
DIDO1	-0.0360077	-0.084428	0.4463	0.0399918
DIP2A	-0.312415	0.397957	0.440809	0.180319
DIP2B	-0.211524	-0.119121	0.792518	0.146376
DIRAS3	1.01021	-0.624913	-1.01893	-0.150148
DIRC2	-0.434181	-0.0685506	-0.221222	-0.350599
DIS3	-0.228024	-0.336403	0.564226	-0.106242
DIS3L	0.267946	-0.0871631	0.101445	-0.142013
DIS3L2	0.104156	-0.365568	0.0992808	0.0641283
DIXDC1	-0.407416	-0.845141	-1.00965	-1.31357
DKC1	0.374008	0.765842	1.42155	1.13802
DKK2	-1.86335	-1.97364	-1.45874	-2.30955
DKK3	-0.812692	-1.40149	-1.4466	-1.10691
DLAT	0.0841742	0.240315	0.834507	0.393799
DLEC1	-0.213123	-0.560893	-1.45362	-1.07135
DLG3	1.25231	0.711136	1.2898	0.770913
DLG4	0.0648579	-0.444532	-0.703231	-0.432978
DLG5	0.417669	0.64016	1.14654	1.16576
DLGAP4	-0.111758	0.0128918	0.334604	0.272495
DLK1	6.11902	0.899111	0.885597	4.48663
DLL1	-1.25914	-1.70254	-1.04758	-0.621155
DLL4	-1.34066	-1.56132	-0.80593	-0.808405
DLST	0.16569	-0.111914	0.0504701	-0.0166255
DLX3	2.37041	1.28094	1.95335	2.20669
DMAP1	0.184396	-0.223194	-0.263021	0.283804
DMD	-0.495712	-0.442485	-0.379352	-0.972017
DMKN	0.09784	0.386888	-0.870279	0.211605
DMPK	-0.7493	-0.379497	-1.10355	-0.0902283
DMRTA1	0.860399	0.133253	0.700959	0.238923
DMTF1	0.124252	-0.197657	0.246275	0.0660862
DMXL1	-0.183554	-0.287339	0.218367	-0.623178
DMXL2	0.0153953	-0.0887684	0.914168	-0.128372
DNA2	0.920172	1.88954	1.64648	2.19603
DNAAF1	-0.0912015	-0.5305	-1.78621	-1.50255
DNAH1	-0.705094	-0.441983	-0.705613	-0.54666
DNAH12	-0.241916	-0.063112	-1.57732	-1.64366
DNAH14	1.67156	1.9224	1.98905	1.88399
DNAH6	-0.369952	-0.632017	-1.01692	-1.40479
DNAH7	0.313913	0.181455	-0.503089	-1.20608
DNAH9	0.0277154	-0.521359	-2.17303	-2.01911
DNAI2	-0.382681	-1.09719	-1.9509	-1.97635
DNAJA1	-0.304451	0.0118101	0.000221211	-0.208204
DNAJA3	0.619891	0.818589	0.896843	0.7939
DNAJA4	0.424172	0.0200328	0.509795	-0.133183
DNAJB11	0.347918	0.467918	0.910122	0.814179
DNAJB14	-0.319754	-0.714592	0.0240724	-0.491896
DNAJB2	0.21327	0.0899766	-0.338862	0.0288936
DNAJB4	-0.753495	-1.8214	-1.11059	-1.19904
DNAJB5	0.266626	-0.494134	-0.129847	-0.371931
DNAJB6	0.0247752	-0.171974	0.195827	0.0842761
DNAJB9	0.417566	0.0947	0.619442	0.0276304
DNAJC10	0.134902	0.486105	1.09495	0.863792
DNAJC11	0.224973	0.274328	0.393018	0.37735
DNAJC13	-0.153758	-0.104039	0.500402	0.00305238
DNAJC15	-0.302844	-0.686702	-0.055222	-0.171834
DNAJC16	0.230292	0.208583	0.837701	0.163101
DNAJC2	0.333004	0.429992	0.743089	0.72783
DNAJC24	-0.258576	0.0701346	0.433338	-0.078617
DNAJC25	0.129793	0.159423	-0.00315422	0.243888
DNAJC27	-0.436592	-0.902756	-0.500759	-0.77061
DNAJC3	0.0286672	0.545794	0.387622	0.209351
DNAJC30	0.526137	0.198752	0.271529	0.243502
DNAJC8	0.349631	-0.3702	0.463074	-0.0400175
DNAJC9	0.116612	0.637528	0.603577	0.860193
DNALI1	0.501485	-0.926061	-0.385869	-0.543135
DNASE1	0.554571	1.38563	1.11356	1.13983
DNASE1L1	0.240469	0.0258505	0.236985	0.0128826
DNASE1L3	-1.92659	-3.67859	-3.19544	-3.47118
DNER	-1.13509	-0.346518	-0.176054	0.844585
DNLZ	0.209147	0.330023	-0.259672	0.122123
DNM1L	-0.3399	0.272155	0.474772	0.333423
DNM2	-0.0159389	-0.378315	0.192634	-0.291461
DNMT3A	-0.0559847	0.0544912	0.418724	0.909453
DNTTIP1	0.15969	0.869352	0.535905	1.52581
DNTTIP2	-0.0076695	0.0172147	-0.240668	0.0807738
DOCK1	0.0854965	-0.304907	0.387161	0.109508
DOCK11	-0.904128	-0.715841	-0.263402	-1.35892
DOCK2	-0.551078	-0.663871	0.0842887	-0.982543
DOCK5	-0.190012	0.265084	0.381672	0.374929
DOCK6	-1.02473	-1.18015	-0.845731	-0.66475
DOCK7	0.1238	-0.0349916	0.732563	0.213449
DOCK8	-0.188073	-0.174357	0.434973	-1.11303
DOCK9	-0.507151	-0.787682	-0.336021	-0.914304
DOHH	-0.0667178	0.379348	-1.06804	0.0543027
DOK1	0.0097456	-0.143009	-0.327053	-0.449803
DOK2	-0.664809	-1.75812	-1.1273	-1.85774
DOK4	0.0769754	-0.0534475	-0.746801	-0.158318
DOK5	2.80837	0.782195	1.97539	2.22385
DOLK	0.128178	0.509398	0.304379	0.127747
DOLPP1	0.764145	0.834121	0.893741	0.888513
DPCD	0.462702	0.739813	0.0385982	0.297772
DPEP2	-1.25455	-2.06994	-1.90101	-2.17792
DPF2	0.0238964	0.227612	0.0888372	0.18819
DPH2	0.640593	0.607504	0.950174	0.902738
DPH3	-0.703768	-0.00433106	-0.4601	-0.676892
DPM2	0.511551	0.459657	0.140825	0.703881
DPM3	0.580498	0.383959	-1.3092	0.617385
DPP3	0.483592	0.490503	0.662664	0.840518
DPP4	1.43139	-0.0203169	1.83541	1.24646
DPP7	-0.108786	0.0378208	-0.294309	-0.0883573
DPP8	-0.192664	-0.198519	0.137794	-0.327419
DPP9	-0.298082	0.548172	0.28407	0.469002
DPT	-0.592036	-1.92213	-2.68333	-1.47508
DPY19L3	-0.156226	0.348279	0.70741	0.0797052
DPY19L4	-0.238385	0.106327	0.206959	0.178179
DPYSL2	-0.219487	-1.41438	-1.51549	-1.58298
DR1	0.00842605	0.071	0.413965	-0.0203183
DRAM1	-0.247028	-0.138567	-1.18343	-1.08174
DRAM2	-0.0179916	-0.0258794	0.246367	-0.116469
DRAP1	0.147526	0.252054	-0.346459	0.487114
DRG1	0.177227	0.544649	0.118175	0.267792
DROSHA	0.228079	0.33797	0.9205	0.831866
DSC2	0.562289	-0.266046	1.50723	0.754548
DSE	-0.568868	-0.69159	0.268508	-0.346105
DSEL	-0.379603	-1.31521	-0.82529	-0.43569
DSG2	0.795142	0.259813	1.54244	1.41121
DSP	0.808263	0.715688	1.92314	2.17414
DST	-0.794426	-0.242654	-0.807967	-1.14375
DTHD1	-0.911176	-0.418822	-1.0652	-1.7895
DTL	1.61397	0.359318	1.98186	1.83721
DTNB	0.550933	0.725578	0.519704	0.247504
DTNBP1	0.36639	-0.0137685	-0.00902617	0.026721
DTWD1	0.0642444	-0.218908	-0.192014	-0.240649
DTX2	0.778189	0.780958	-0.760073	1.29529
DTX3	-0.0596605	-0.117601	-0.039047	0.158993
DTX3L	-0.406772	0.61266	0.622832	0.252959
DTX4	0.161014	-0.144704	-0.0648055	-0.344284
DTYMK	0.608176	0.657208	0.54599	1.3049
DUOX1	-0.889494	-2.20853	-2.80977	-2.55321
DUOXA1	-0.362253	-2.15488	-2.49397	-1.97947
DUS1L	0.464587	0.638092	0.400249	1.22589
DUS4L	0.318614	0.921362	1.21466	1.07972
DUSP1	-0.429719	-0.851095	-1.78421	-1.56356
DUSP11	-0.191749	-0.127534	0.282554	0.211202
DUSP12	0.400266	0.286223	0.482479	0.656635
DUSP14	-0.844026	-0.0027293	0.165919	0.213891
DUSP19	-0.441515	0.0656129	-0.333481	-0.806902
DUSP22	-0.0535577	-0.246848	-0.367291	-0.368501
DUSP23	0.695789	0.405187	0.168542	1.0553
DUSP3	-0.212101	-0.413006	-0.246881	-0.662963
DUSP4	-0.881245	1.63041	0.644203	2.44345
DUSP7	-0.453261	-0.10679	-0.29722	-0.518016
DUSP8	-0.400754	-0.438642	-1.45068	-1.11932
DUT	0.152229	0.0919443	-0.319949	0.0843236
DVL1	0.208788	0.231186	0.193018	0.579609
DYDC2	0.0489778	-0.408568	-0.959507	-1.94543
DYM	-0.151284	0.117838	0.200628	-0.138654
DYNC1H1	-0.154124	0.185502	0.179284	-0.0545949
DYNC1I2	-0.188359	-0.163318	0.307414	-0.00250523
DYNC1LI1	-0.288704	0.194646	-0.119528	-0.329632
DYNC2H1	-0.228733	-0.898859	-0.276408	-1.0463
DYNLL2	0.490766	0.213317	-0.173485	0.103394
DYNLRB2	-0.430884	-0.249321	-2.09767	-1.98478
DYNLT1	0.0873626	0.397973	-0.0830126	0.364259
DYNLT3	-0.330481	-0.252224	0.167003	-0.246149
DYRK1A	-0.0195391	-0.436734	0.740557	-0.251066
DYRK1B	-0.385945	-0.0262598	-0.232417	-0.0550284
DYRK3	-0.0270453	-0.147291	-0.468433	-0.693454
DYRK4	-0.346041	-0.102011	-0.0230024	-0.169204
DZIP1	-1.22356	-0.984558	-0.753227	-0.385715
E2F4	-0.190142	0.334295	0.304137	0.350923
E2F5	0.568402	1.11334	1.09421	1.23211
E2F6	-0.160598	0.307409	0.217067	0.469254
E2F8	2.48952	3.51427	4.12857	3.16821
E4F1	0.190283	0.486673	0.289187	0.632569
EAF1	0.0228738	0.0578171	-0.53229	-0.213502
EAPP	0.196703	0.410077	0.21833	0.208174
EARS2	0.599772	0.963371	1.21519	0.763837
EBAG9	-0.345541	0.117951	-0.0654981	-0.232436
EBLN2	-0.354172	-0.119851	0.387004	0.152368
EBNA1BP2	0.50266	0.267879	0.595033	0.658271
EBP	0.297542	0.480575	0.180315	0.114432
EBPL	-0.36727	-0.0118703	-1.49329	0.161721
ECE1	-0.697254	-0.528378	0.0836996	0.164386
ECH1	0.304289	0.223548	0.137195	0.0648292
ECHDC1	0.0686175	0.192322	-0.299688	-0.757448
ECHDC2	0.0638369	0.0108522	-0.583099	0.0379875
ECHDC3	0.412266	-1.12948	-1.31072	-0.372468
ECI2	0.138237	-0.498736	-0.127837	-0.0870347
ECM1	0.884607	-0.316244	1.2937	1.65895
ECM2	-0.98916	-1.70804	-1.09328	-1.30918
ECT2	0.605716	1.87544	2.3518	2.14742
ECT2L	-0.343746	-0.45668	-1.17576	-1.68721
EDC3	0.488632	0.196236	0.204715	0.237694
EDC4	-0.238926	0.120792	-0.068361	0.172567
EDEM2	-0.255853	0.209741	0.346196	0.0504024
EDEM3	0.38986	0.446797	1.54805	0.52074
EDF1	0.350923	0.0471161	-0.717413	0.351777
EDIL3	-0.147247	-2.40807	-0.372102	-0.61969
EDN2	0.393973	1.35952	1.25861	1.84148
EDNRA	-0.939388	-1.36249	-0.486572	-0.87161
EDNRB	-2.50468	-3.17681	-2.5035	-3.5176
EEA1	-0.482698	-0.241601	0.31198	-0.421236
EED	-0.0447697	0.625839	0.567493	0.630646
EEF1A2	3.16834	2.58709	3.95757	6.40058
EEF1B2	0.564306	0.092728	-0.141875	0.458407
EEF2	0.269545	0.249384	-0.064294	-0.0671265
EEF2K	-0.0585247	-0.917882	-0.312626	-0.16878
EEFSEC	0.198197	0.131817	-0.0953551	-0.00528077
EFCAB1	-0.273981	-1.21535	-1.7472	-2.05591
EFCAB2	0.400879	0.477015	-0.126272	0.388796
EFEMP1	-0.80706	-0.436617	-1.31221	-1.60943
EFEMP2	-0.751637	-1.1218	-0.649699	-0.784582
EFHD1	-0.106479	-0.403971	0.196918	0.91151
EFHD2	-0.380625	-0.60061	-0.527284	0.0556575
EFNA5	0.275583	0.094997	0.926816	1.40229
EFNB1	-0.761227	-1.06516	-0.978591	-0.987796
EFNB2	-0.912951	-1.08765	-0.796255	-1.07314
EFR3A	-0.0661864	-0.122254	1.1418	0.180961
EFR3B	-1.33224	0.249391	-1.92545	-1.1289
EFTUD2	0.226093	0.355047	0.829461	0.532415
EGF	1.05009	2.47431	2.14354	2.24772
EGFL6	-0.793183	-1.25633	-0.240376	-0.893815
EGFL7	-1.2584	-1.61426	-2.22663	-0.915396
EGFR	1.2634	0.0215604	1.14798	0.393569
EGLN3	-0.174938	1.53243	1.80789	3.05258
EGR1	-1.31693	-0.794051	-2.32863	-1.8432
EGR2	-1.63296	-1.28093	-0.698654	-1.8536
EHBP1	-0.515411	-0.111121	-0.12953	-0.167593
EHBP1L1	-0.14447	-0.455617	-0.616908	0.228265
EHD1	-0.632256	-0.587352	-0.666895	-0.829559
EHD2	-0.376555	-0.835517	-1.12469	-1.2635
EHD3	-1.28463	-0.380959	0.0880541	-0.274075
EHF	1.19974	1.06269	1.68035	0.650719
EHHADH	0.233064	0.519766	0.517769	0.169293
EHMT2	0.49017	0.406195	0.398741	0.772553
EI24	0.4101	0.136455	0.237286	0.366704
EID1	-0.225894	-0.657507	-0.372112	-0.690442
EID2	-0.346204	0.220733	-1.07071	-0.161853
EID3	-1.37627	-1.11957	-0.700358	-0.198708
EIF1	-0.179286	-0.139669	-0.688304	-0.431576
EIF1AD	-0.00817436	0.210742	0.356815	0.44027
EIF1AX	-0.0982802	-0.179185	0.357031	-0.213525
EIF2A	0.183374	0.0467246	0.220198	0.185851
EIF2AK3	0.0726821	0.404561	0.479816	0.226391
EIF2AK4	0.0397561	0.0350536	0.379678	0.0123327
EIF2B1	0.0813816	0.0923418	0.298648	0.407115
EIF2B2	0.187117	0.375688	0.466744	0.518695
EIF2B4	0.328071	0.319242	0.0914849	0.488535
EIF2B5	0.20984	0.408669	0.224103	0.379172
EIF2D	0.543994	0.354597	0.208443	0.237331
EIF2S1	-0.101853	-0.058906	0.600545	0.140787
EIF3A	0.0414152	0.127575	0.435058	0.110455
EIF3B	0.398059	0.314131	0.61294	0.958616
EIF3D	0.353813	0.11904	0.170992	0.215636
EIF3F	0.37837	-0.0331135	-0.347983	-0.0835025
EIF3G	0.181403	0.241462	-0.222926	0.00305124
EIF3H	0.189681	0.12662	0.338313	0.41634
EIF3J	0.178482	0.279621	0.490175	0.215677
EIF3K	0.182517	-0.0560193	-0.323524	0.0764194
EIF3L	0.437007	-0.0576938	-0.287987	-0.27541
EIF3M	0.334251	0.287525	0.286808	0.282503
EIF4A2	-0.193866	-0.227012	0.276055	-0.133096
[truncated: 5,846 more rows]

## Sheet: Supplementary Table 5B
protein	Our data	Xu et al, 2020	CPTAC
A1BG	-0.461301	-1.01801	-0.810678
A2M	-0.906845	-0.691779	-1.11643
AAK1	-0.211976	1.39754	0.00906102
AAMDC	-0.19651	1.19194	-0.326201
AARS	0.290041	3.37311	0.510825
AARS2	0.271059	1.50195	0.215939
AASS	0.147283	0.39446	-0.0611175
ABCA3	-0.317709	-1.15711	-1.17114
ABCA8	-0.106309	-3.50747	-1.44985
ABCB10	0.358662	0.42831	0.0683305
ABCC3	0.483449	4.90461	0.889959
ABCD3	0.502842	1.22035	0.371035
ABCE1	0.420931	2.65823	0.385215
ABCF1	0.526672	2.73673	0.333337
ABCF2	0.105845	3.07269	0.416623
ABHD10	0.511187	0.27685	0.019682
ABHD11	0.101993	2.44612	0.341817
ABHD14B	0.164191	1.69732	-0.372583
ABHD16A	0.795749	0.264197	0.0523216
ABI1	0.116441	-0.272019	-0.209074
ABI3BP	-0.481471	-3.18913	-1.30042
ABLIM1	-0.0269311	-2.56661	-1.105
ABR	0.312303	2.25254	-0.0288591
ACAA1	-0.235198	0.346747	-0.122481
ACAA2	0.211976	-0.407414	-0.397782
ACACA	0.1275	3.06041	0.167604
ACAD8	0.545401	2.07188	0.409432
ACAD9	0.128003	0.154016	-0.00469596
ACADL	-0.0533769	-1.44614	-1.1033
ACADM	1.08892	0.827728	0.211676
ACADS	0.130434	-0.334418	-0.329225
ACADSB	0.582959	0.321135	0.0707458
ACADVL	0.128003	-0.00317295	-0.0804916
ACAP2	-0.24242	1.29259	-0.24226
ACAT1	0.518136	-0.371093	-0.262539
ACAT2	-0.326906	2.14099	-0.334153
ACBD3	0.512179	2.69784	0.604912
ACBD5	0.554374	0.944373	0.405573
ACE	-0.358114	-3.4263	-1.17159
ACIN1	0.261888	0.351306	0.321962
ACLY	-0.0269311	1.44294	-0.0360383
ACO1	0.459743	3.08432	0.343288
ACO2	0.293393	0.672045	0.195524
ACOT1	0.523103	0.50702	-0.242379
ACOT13	0.369412	1.1522	0.229547
ACOT8	-0.0283692	0.527552	0.138612
ACOT9	0.271059	-0.0289014	-0.106658
ACOX1	0.140533	0.825519	0.0792166
ACP1	-0.201342	1.70426	-0.180451
ACP2	0.266738	1.28413	0.20741
ACP5	-0.342615	-1.35858	-1.21895
ACSF2	0.53065	0.872257	0.0957732
ACSL1	-0.0750371	0.32032	-0.0570486
ACSL3	0.0817746	0.112296	0.235326
ACSL4	-0.0692627	0.337443	-0.178412
ACSL5	0.102457	1.30936	0.254404
ACSS1	0.076962	0.807565	-0.195187
ACSS2	0.104882	3.08787	-0.234946
ACSS3	-0.17475	-0.556936	-0.715473
ACTA1	-0.236166	-1.76547	-0.711087
ACTB	0.179124	0.41975	0.0991126
ACTBL2	0.0683003	0.596038	-0.36391
ACTL6A	0.316735	0.814997	0.236972
ACTN1	-0.00769439	0.0319376	-0.257808
ACTN2	-0.261359	-3.22205	-1.58944
ACTN4	0.105845	-0.126483	-0.343365
ACTR1A	0.225519	-0.192305	-0.420974
ACTR1B	0.338713	-0.266239	-0.327286
ACTR2	-0.0394361	1.2717	-0.0431274
ACTR3	0.135254	1.15568	0.0135112
ACY1	-0.0115455	2.55254	0.134933
ACYP1	0.141497	1.65382	-0.369589
ACYP2	-0.00144294	1.16766	-0.274331
ADAM9	0.417843	0.22581	0.605778
ADAR	0.530063	1.60329	0.576856
ADD1	-0.263299	-1.36139	-0.791565
ADD2	-0.648368	-2.8336	-1.34816
ADD3	-0.19651	-1.37311	-0.766008
ADH1B	-0.539019	-1.73135	-1.87201
ADH1C	0.437501	-0.264547	-0.861432
ADH5	0.388002	1.24881	-0.476036
ADIRF	-0.319116	-1.82815	-1.82437
ADK	0.461145	3.50428	0.279619
ADO	-0.163171	1.30522	-0.0300244
ADPRH	-0.600006	-0.0521152	-0.495864
ADPRHL2	0.297281	2.66501	0.0923197
ADRM1	0.405644	1.46895	0.567926
ADSL	0.0115416	2.23834	-0.151222
AEBP1	-0.179064	0.0167556	-0.102063
AFG3L2	0.165611	0.463458	0.370834
AFM	-0.467638	0.390029	-0.925279
AGA	0.778151	0.890428	0.320592
AGER	-0.545587	-4.82184	-1.84197
AGFG1	0.207141	0.924717	-0.0773471
AGK	0.199409	0.385764	0.506131
AGL	0.422334	1.15323	-0.0194814
AGO1	0.125615	0.971129	-0.168739
AGO2	-0.104383	0.238883	-0.188246
AGO3	0.177193	0.541212	-0.144968
AGPAT2	0.0827372	-0.600102	-0.0570653
AGPS	0.142003	0.630833	0.0250482
AGR2	0.801973	3.28554	0.989513
AGRN	-0.00625273	-2.47263	-0.936817
AGT	-0.565355	0.423179	-0.875905
AHCY	0.227976	2.6148	0.244492
AHCYL1	0.103455	1.65241	0.223823
AHCYL2	0.440036	1.90084	0.296024
AHNAK	-0.253077	-1.72272	-1.17854
AHNAK2	-0.132822	1.94565	0.598204
AHR	0.385489	1.05614	0.166574
AHSA1	0.351827	2.80872	0.362734
AHSG	-0.618711	0.651812	-0.776076
AHSP	-0.830075	-0.831118	-1.76921
AIDA	0.520123	0.853921	-0.164192
AIF1	0.307977	0.467561	-0.0027518
AIF1L	0.318249	-1.19996	-0.712394
AIFM1	0.745563	0.851827	0.297838
AIMP1	0.385489	0.989501	0.405896
AIMP2	0.529068	0.827658	0.336168
AIP	0.2551	1.28654	0.19828
AK1	0.226486	0.912016	-0.841274
AK2	0.697479	1.1737	0.372247
AK3	0.105381	-0.209897	-0.343557
AKAP1	0.293393	1.65006	0.4797
AKAP12	-0.502261	-1.55369	-1.0933
AKAP8	0.185432	1.12585	0.246925
AKAP8L	0.0139485	1.41405	0.404263
AKAP9	0.403124	0.589222	0.109525
AKR1A1	0.467224	2.63326	0.013398
AKR1B1	0.0529047	2.07497	-0.14763
AKR1C1	0.3978	4.1631	-0.186224
AKR1C3	0.525091	4.01635	-0.223865
AKR7A2	0.299661	1.55979	-0.0712091
AKT1	0.146776	2.42094	-0.0146914
ALAD	-0.468625	0.211489	-0.791885
ALB	-0.581958	0.881442	-0.922094
ALCAM	0.160786	-0.267733	-0.100588
ALDH16A1	0.0086562	0.460531	-0.371001
ALDH18A1	0.454812	2.95986	1.04193
ALDH1A1	-0.205657	0.0476582	-1.03348
ALDH1B1	0.0658835	0.747138	0.350418
ALDH2	0.306032	-0.225414	-0.436302
ALDH3A1	0.154034	6.10811	-0.707109
ALDH3A2	0.0957499	0.00258259	-0.128803
ALDH3B1	0.469613	-1.84138	-0.869922
ALDH4A1	0.469613	0.735848	-0.0699462
ALDH5A1	0.928092	1.12845	0.0676464
ALDH9A1	0.571548	0.809055	-0.158281
ALDOA	0.3978	2.63762	0.456764
ALDOC	0.101494	2.39644	0.194705
ALG2	0.128463	0.0588095	-0.0195829
ALG5	0.72262	0.60746	0.272514
ALOX5	0.0211599	-0.403796	-0.533852
ALOX5AP	0.120294	-0.321784	-0.654751
ALYREF	0.275912	1.29787	0.396005
AMBP	-0.440036	-1.9549	-0.686884
AMPD2	0.0726431	1.38606	0.359352
ANK1	-0.810946	-3.69362	-1.47224
ANK2	-0.679401	-0.585121	-0.791693
ANK3	0.286059	0.406952	-0.197458
ANKFY1	0.152105	1.07888	-0.268043
ANKMY2	0.163626	-0.293193	0.0807256
ANKRD44	0.0894758	0.861545	-0.253136
ANKS1A	0.490375	0.360716	-0.286096
ANO6	-0.214877	-2.5615	-0.51589
ANP32A	0.639889	2.33709	0.230053
ANP32B	0.537028	2.52863	0.236979
ANP32E	0.822398	3.22719	0.476751
ANPEP	0.419949	0.878993	0.0407335
ANTXR2	-0.18833	-0.740411	-0.13831
ANXA1	0.136173	-0.170241	-0.348026
ANXA11	0.0654134	-0.44666	-0.0897388
ANXA2	-0.211976	-0.566175	-0.752921
ANXA3	-0.346518	-1.58566	-1.17458
ANXA4	0.127542	-0.34624	-0.306626
ANXA5	0.348899	0.392139	-0.228031
ANXA6	-0.121258	-0.654098	-0.374647
ANXA7	0.0899421	0.0876043	-0.0691779
AOC3	-0.313381	-2.43717	-1.18463
AP1B1	-0.0375122	0.86836	0.0762625
AP1G1	0.118367	1.10881	0.30342
AP1M1	0.0225989	0.884161	-0.144216
AP1M2	0.555966	3.28689	0.59663
AP1S2	0.00673259	-0.0424928	-0.412043
AP2A1	0.0375122	-0.119771	-0.0693673
AP2A2	0.217779	-0.140234	-0.187849
AP2B1	0.0500184	0.0967229	-0.131399
AP2M1	-0.105845	-0.039931	-0.158351
AP3B1	0.406625	1.24893	0.173496
AP3D1	0.100067	1.30682	0.220261
AP3S1	-0.211976	1.09523	0.172724
APBB1IP	-0.142968	1.91285	-0.0241968
APCS	-0.537211	-0.975284	-1.03755
APEH	-0.0783927	1.87709	-0.498642
APEX1	0.322577	2.52529	0.316664
API5	0.23423	1.98662	0.204079
APIP	0.532052	2.14422	-0.0309442
APLP2	0.133326	0.266349	-0.0246747
APMAP	-0.0634888	0.315649	0.0855138
APOA1	-0.935185	0.124158	-1.00166
APOA2	-0.919214	-0.144317	-1.00195
APOA4	-0.605028	-0.30578	-0.839219
APOB	-0.768477	-1.46602	-1.11403
APOBEC3C	0.0678078	0.633734	0.143604
APOBR	-0.0678078	-0.512984	-0.300062
APOC1	-1.2941	-0.916613	-1.10367
APOC3	-1.08159	-1.52974	-1.26442
APOD	-0.690979	0.159945	-0.575964
APOE	-0.58336	0.0253051	-0.37773
APOH	-0.447762	-1.19454	-0.530159
APOL1	-0.989193	-0.645376	-0.930545
APOL2	-0.0187584	0.746813	0.129549
APOM	-0.619108	0.334957	-1.09196
APPL1	-0.00288539	0.0360687	-0.41659
APRT	0.324093	2.37027	0.0862684
AQP4	-0.00817393	-1.98997	-1.1934
ARAF	0.174297	1.50946	0.130765
ARAP1	-0.0875504	1.34775	-0.407976
ARCN1	0.510604	2.51798	0.505704
ARF4	0.390941	2.29703	0.548625
ARF5	0.319116	1.88138	0.309991
ARF6	0.0437578	1.07635	0.0398224
ARFGAP1	0.0509805	2.85783	0.624085
ARFGAP2	0.560957	2.70888	0.309626
ARFGAP3	0.251139	1.95123	0.643135
ARFGEF1	0.185883	2.62689	0.422534
ARFGEF2	0.313381	2.24433	0.262698
ARFIP1	0.132362	2.53087	0.124358
ARGLU1	0.458757	0.504244	0.287196
ARHGAP1	0.159366	2.27482	-0.0342321
ARHGAP17	0.350851	0.935946	-0.32846
ARHGAP18	-0.385489	0.11012	-0.391255
ARHGAP25	-0.068793	1.36367	-0.202928
ARHGAP31	-0.343045	-1.33774	-0.781159
ARHGDIA	0.0793815	1.79598	-0.140924
ARHGDIB	0.313815	1.99288	-0.00781709
ARHGEF1	0.147283	1.77137	-0.126909
ARHGEF12	0.0706944	-0.127479	-0.272521
ARHGEF6	-0.0274166	0.221574	-0.368379
ARHGEF7	0.195994	0.56872	-0.109218
ARID1A	0.389961	0.729783	0.220479
ARIH1	0.280233	2.88866	0.242734
ARL1	0.557962	2.15365	0.474528
ARL2	0.19316	1.28836	-0.0636008
ARL3	-0.140533	2.56969	0.114434
ARL6IP1	-0.191679	0.14486	0.188786
ARL6IP4	0.174809	0.792613	0.428717
ARL6IP5	0.211976	-0.245775	-0.25513
ARL8A	0.154998	0.116112	-0.254599
ARL8B	0.39584	-0.282972	-0.317293
ARMC10	0.109198	0.49186	0.219956
ARMC8	0.224551	0.391248	-0.0506791
ARMCX2	0.0370374	0.480661	-0.123504
ARMCX3	0.225519	2.81552	0.606298
ARMT1	0.136677	2.46791	0.0185827
ARPC1A	0.15114	0.433588	-0.300668
ARPC1B	0.0683003	1.11783	0.083856
ARPC2	0.120796	1.24553	-0.0450508
ARPC3	0.398223	1.21008	0.0763282
ARPC4	0.143426	1.06626	-0.0447235
ARPC5	0.0264546	1.15906	0.0490902
ARPIN	0.138605	1.03181	-0.141578
ARPP19	0.327015	1.14222	-0.213508
ARRB1	-0.0351132	0.221764	-0.579157
ARRB2	-0.30355	0.0810965	-0.191549
ARSA	1.08194	1.98236	0.143671
ARSD	-0.348899	0.553321	0.229283
ASAH1	0.190713	-0.215558	-0.744463
ASH2L	-0.0870545	1.15046	0.250341
ASL	0.204241	2.37298	-0.052097
ASNA1	0.10103	1.16396	-0.197406
ASPH	0.626159	0.667298	0.358916
ASPN	-0.3929	-1.86508	-0.784392
ASRGL1	0.254046	3.52417	-0.216636
ATAD1	0.208557	0.73684	0.497571
ATAD3A	0.33232	1.33285	0.752812
ATAD3B	1.0838	1.36575	0.514969
ATE1	0.00384719	-0.0282857	-0.196158
ATG3	-0.194062	2.57594	-0.0871055
ATG7	0.323119	2.02956	-0.137983
ATIC	-0.00144246	3.20334	0.347916
ATL2	0.424299	0.903716	0.563432
ATL3	0.303114	-0.316822	-0.146103
ATOX1	0.0230836	2.57188	0.106476
ATP11A	0.143426	0.100949	0.171305
ATP13A1	-0.0307787	1.04674	0.445267
ATP1A1	0.214877	-0.259228	0.159411
ATP1B1	0.522517	-0.0991799	0.48084
ATP1B3	-0.0567533	-0.595602	-0.172446
ATP2A2	0.333726	0.559433	0.482148
ATP2A3	-0.105845	-0.296914	0.0873287
ATP2B4	-0.0211599	-1.55806	-0.361859
ATP2C1	0.939118	0.982078	0.247704
ATP6V0A1	0.211457	0.232368	0.135693
ATP6V0C	0.288535	-0.211419	-0.0752095
ATP6V1A	0.143426	1.09497	-0.116575
ATP6V1B2	0.0659055	0.8649	-0.151347
ATP6V1C1	0.0197139	1.62975	0.158306
ATP6V1D	0.277321	1.3235	-0.189397
ATP6V1E1	0.176228	0.983174	-0.0916763
ATP6V1G1	0.442005	0.898075	-0.0561912
ATP6V1H	0.157383	1.13662	-0.130768
ATRIP	-0.0813069	-1.21642	0.0547138
ATRN	-0.123687	0.90538	-0.538281
ATXN10	0.257481	3.55127	0.358725
ATXN2	0.451855	1.17086	0.265233
ATXN2L	0.288001	2.47181	0.602638
AUP1	0.0947868	0.887227	0.271191
AZGP1	-0.713417	1.62505	-0.615711
AZU1	-0.273971	-1.5272	-0.273427
B2M	-0.0505079	-0.307683	-0.19955
BAG1	0.0577155	0.737035	-0.0185799
BAG2	0.242502	-0.680905	-0.302409
BAG3	0.151597	0.530491	-0.00417912
BAG5	0.110161	0.232563	-0.00321119
BAG6	0.407606	1.93833	0.209535
BAIAP2	0.11305	0.00577204	-0.149486
BAIAP2L1	0.583961	4.01847	1.0152
BASP1	0.118829	1.24472	0.726935
BAX	0.379192	1.48794	0.0973799
BAZ1B	-0.122221	0.614763	0.223465
BCAM	-0.388002	-3.04605	-1.17914
BCAP29	0.681198	-0.343854	-0.171503
BCAP31	0.398357	0.571163	0.350994
BCAT2	0.0890092	0.181939	-0.20668
BCHE	-1.0849	-2.08558	-1.21173
BCKDHA	0.285088	0.314223	0.0293174
BCKDHB	0.332863	-0.0334776	0.0123599
BCL2L1	0.0336644	0.650579	0.332887
BCL2L13	0.256512	0.816816	-0.11211
BCLAF1	0.70831	0.87118	0.457137
BCS1L	-0.854135	0.141994	0.0901008
BDH1	1.18219	1.79864	0.446718
BDH2	0.226486	1.06391	-0.533868
BGN	-0.416861	-1.4747	-1.08751
BHMT	-0.0952525	-2.41945	-0.0448662
BIN1	-0.0976759	1.37861	-0.168642
BIN2	0.212495	1.38506	-0.227033
BLMH	0.143884	1.45828	-0.23937
BLOC1S1	0.138605	0.574992	0.00527456
BLVRA	0.392476	2.90516	0.0643048
BLVRB	-0.409569	1.01781	-0.837478
BNIP1	-0.155455	0.557933	0.165791
BOLA2	-0.0168288	3.11713	0.486364
BPGM	-0.876204	-0.365325	-1.20988
BPHL	0.684247	2.53081	0.336341
BPIFB1	-0.896945	-0.655212	-0.358097
BPNT1	0.344021	3.24596	0.329984
BRD4	0.349328	0.673119	0.159376
BRK1	0.0538669	-0.00831813	-0.276646
BROX	0.130434	2.92019	0.401143
BSG	0.192645	0.776279	0.577134
BST1	-0.463118	-1.32288	-0.535791
BST2	-0.664567	-2.46736	-0.464191
BTD	-0.267179	0.139736	-0.652997
BTF3	0.520123	1.64565	0.299829
BTF3L4	-0.285088	2.8052	0.364802
BTN3A3	-0.0683003	-2.06048	-0.62273
BUB3	0.321603	1.1609	0.261858
BZW1	0.359639	3.02901	0.669679
BZW2	0.458757	4.69418	1.1302
C11orf54	0.384511	2.34628	-0.584881
C11orf68	-0.228422	1.81673	-0.0739883
C12orf57	0.632822	0.493124	0.246005
C16orf58	0.60865	0.995509	0.393655
C16orf89	0.198509	2.11781	0.293829
C19orf53	0.353351	1.25612	-0.333066
C1GALT1C1	0.713417	1.98166	0.144342
C1QA	-0.958003	-0.124088	-0.403785
C1QB	-0.315762	-0.276493	-0.448877
C1QBP	0.227008	0.802721	0.238679
C1QC	-0.388982	-0.143025	-0.30423
C1QTNF7	-0.0659055	-2.8852	-1.08348
C1R	-0.633218	0.429051	-0.383366
C1S	-0.864259	0.33963	-0.382924
C2	-0.44102	0.2104	-0.548665
C20orf27	0.0654134	1.89454	-0.27511
C3	-0.689333	0.0281037	-0.85597
C4B	-0.683231	0.367305	-0.786111
C4BPA	0.0149105	-0.600393	-0.548922
C4BPB	-0.407606	-1.09832	-0.81672
C5	-0.680182	0.0718213	-0.716855
C6	-0.442989	0.889069	-0.663856
C7	-0.358114	-0.0488476	-0.819555
C8A	-0.507801	0.463221	-0.578463
C8B	-0.060131	0.307551	-0.574364
C8G	-0.316196	0.211428	-0.565537
C8orf82	-0.467638	1.23671	0.112013
C9	-0.428231	0.208198	-0.658315
C9orf64	0.228944	2.49864	-0.142859
C9orf78	0.0528871	0.607027	0.242305
CA1	-1.08636	-0.992187	-1.61188
CA2	-0.474138	-0.0281261	-1.34364
CA3	-0.473564	0.320393	-1.59444
CA4	-0.426265	-3.91521	-2.25472
CAB39	0.228867	2.09474	0.0951889
CAB39L	0.0197204	0.0908531	-1.02916
CACNA2D1	-0.309923	-1.65423	-0.409212
CACNA2D2	0.317169	-1.93431	-0.943276
CACYBP	0.687298	2.9166	0.527406
CAD	0.0403981	2.296	0.381333
CADM1	0.526085	-0.495916	-0.242228
CALB2	0.00673259	1.97544	-0.889162
CALD1	-0.067338	0.377547	-0.38247
CALML3	0.0759995	1.86948	-0.490227
CALR	0.644324	0.940767	0.541787
CALU	0.725306	1.63224	0.811461
CAMK1	-0.102956	0.0571854	-0.145381
CAMK1D	0.307005	2.40593	0.418645
CAMK2D	0.551975	0.53275	-0.102631
CAMK2G	-0.0163507	0.1225	-0.148043
CAMP	-0.555966	-1.42676	-0.500223
CAMSAP1	-0.194577	-1.64806	-0.00100025
CAND1	0.0644511	1.87096	0.109125
CANX	0.594589	0.343806	0.47812
CAP1	0.264269	1.33519	0.0636672
CAP2	-0.771303	0.115206	-0.633501
CAPG	0.112587	1.62643	0.0214135
CAPN1	-0.130894	0.866324	-0.259113
CAPN2	0.345426	0.909221	-0.411133
CAPNS1	0.0394361	0.823498	-0.356983
CAPRIN1	0.27538	2.09811	0.663133
CAPS	-0.0711874	0.230128	-0.651098
CAPZA1	0.243914	0.704912	0.0565142
CAPZA2	-0.0634888	0.0372525	-0.209099
CARHSP1	0.00192359	1.57279	-0.196615
CARS	-0.0933268	2.47158	0.140132
CARS2	0.275912	0.678487	0.0315007
CASC4	0.678775	1.49112	0.339589
CASK	0.632209	0.752998	0.151828
CASP1	0.156471	1.85977	-0.212439
CASP3	0.229912	2.90546	0.50892
CASP8	-0.274941	2.73683	0.250748
CAST	0.135254	1.23805	-0.123336
CAT	-0.586365	-1.0721	-1.18477
CAV1	-0.510778	-2.53943	-2.10043
CAV2	-0.549388	-3.36537	-2.45375
CBFB	0.407606	2.22052	0.529611
CBL	-0.125573	1.29035	-0.180732
CBR1	0.177193	2.13461	-0.0682434
CBR3	0.282708	2.09215	-0.0872126
CBR4	0.506227	0.832059	0.0938073
CBX1	0.325067	0.685588	0.0931188
CBX3	0.518136	1.18772	0.500804
CBX5	0.301706	0.723991	0.355351
CC2D1A	0.174297	1.24471	-0.0439088
CC2D1B	0.233262	1.18464	-0.106843
CCAR1	-0.0529047	0.574646	0.38821
CCAR2	0.32063	0.741531	0.108342
CCDC124	0.285621	2.29573	0.196523
CCDC22	-0.157892	1.05459	-0.275868
CCDC47	0.668623	0.982639	0.479812
CCDC50	-0.232294	0.202057	-0.37425
CCDC58	0.608043	1.18125	0.571765
CCDC6	0.148704	1.85694	0.282102
CCDC86	0.331234	1.03911	0.566389
CCDC88A	-0.509203	0.275968	-0.205357
CCDC93	0.327448	1.42823	-0.118432
CCNK	-0.505235	1.54409	0.537942
CCNY	0.112587	-1.03296	-0.287327
CCS	-0.0577155	1.92483	-0.273363
CCT2	0.0187522	-0.0400228	0.114584
CCT3	0.177193	0.0886318	0.229689
CCT4	0.253604	0.154278	0.0916063
CCT5	0.124651	0.0696396	0.140905
CCT6A	0.167541	0.0837198	0.130831
CCT7	0.0144319	0.0494774	0.0962885
CCT8	0.191679	0.116577	0.216299
CD109	-0.304624	-2.41262	-1.2111
CD14	-0.841193	-0.999009	-0.362013
CD151	0.111624	-1.62843	-0.273694
CD163	0.347923	-0.0272791	-0.0192115
CD2AP	0.295872	1.75793	0.482919
CD34	-0.0630182	-2.99983	-1.4441
CD36	-0.534042	-4.76383	-1.97919
CD38	-0.102492	2.08765	0.576607
CD44	0.355733	-0.71372	-0.226398
CD46	0.287564	-0.374561	0.412377
CD47	-0.00384719	-1.27163	-0.335354
CD55	0.203275	-1.60293	-0.744306
CD59	0.163681	-1.0934	-0.247124
CD5L	-0.321171	-1.50117	-0.84938
CD63	0.105381	0.733762	0.461776
CD74	0.284117	0.744236	-0.00886196
CD81	0.0293309	-1.46561	-0.52694
CD82	-0.495325	-1.83814	-0.366454
CD9	-0.060131	-1.13457	-0.696561
CD93	-0.356709	-3.22498	-1.24242
CD99	0.1001	-1.13661	-0.330581
CDC37	0.137136	1.25018	0.109324
CDC42	0.406203	0.273461	-0.240591
CDC42BPB	-0.0976434	0.052263	-0.141343
CDC5L	0.130894	0.545537	0.401522
CDH1	0.155963	0.403844	0.220291
CDH13	-0.34207	-2.97381	-1.21056
CDH5	-0.446929	-4.03479	-1.34297
CDIPT	0.128967	-0.47623	-0.0514107
CDK16	0.13429	0.923485	-0.0426932
CDK2	0.0529047	2.85479	-0.0479975
CDK5	0.0942896	2.12588	0.386236
CDK5RAP3	0.135713	1.1575	0.0854706
CDKN2AIP	0.4706	1.53787	0.292889
CDS2	0.104882	-0.507167	-0.238752
CDV3	0.171855	2.92226	0.167775
CEACAM6	0.0750371	1.24361	0.468872
CEBPB	-0.151648	-0.0761993	0.0533586
CELF2	0.53065	0.571215	-0.293461
CEP170	0.376683	2.21423	0.14233
CEP170B	0.471014	-0.180602	0.258094
CEP290	0.086092	0.228521	-0.249032
CEP350	0.328854	-1.60792	0.0502079
CERS2	0.281737	0.36214	0.082519
CES1	-0.106808	-1.43961	-1.24615
CFAP20	0.170436	0.890471	0.0399311
CFB	-0.564953	1.15486	-0.680469
CFDP1	0.289944	-3.19878	0.318942
CFH	-0.499288	0.0451658	-0.513528
CFHR1	-0.100565	-0.414159	-0.525021
CFI	-0.383107	1.16516	-0.624376
CFL1	0.30895	1.88708	0.290479
CFL2	-0.186849	-0.886284	-0.91522
CGN	0.0976434	-0.174775	-0.00625375
CGNL1	0.0134653	-0.765738	-0.967116
CHCHD3	0.494335	-0.0127894	0.23221
CHD2	0.158857	0.767112	0.272553
CHD3	0.238103	-1.65971	0.155998
CHD4	0.340549	0.98161	0.276156
CHERP	0.0500184	0.553791	0.266769
CHID1	0.257567	1.24976	0.115328
CHMP1A	0.303114	1.47419	0.190186
CHMP1B	0.267709	0.731794	0.0640944
CHMP2A	0.241008	1.10941	0.076809
CHMP2B	0.216811	1.13587	0.326891
CHMP4B	0.264269	1.56654	0.391141
CHMP5	0.0740746	1.27791	-0.0070899
CHORDC1	-0.0784188	2.58381	0.503144
CHTOP	0.653032	0.494685	0.270399
CIAPIN1	0.233262	2.68159	0.60113
CIC	0.616089	0.538566	0.0889531
CISD1	0.239071	0.760996	0.653736
CISD2	0.307977	1.114	0.683324
CIT	0.899431	3.62626	0.852278
CKAP4	0.39584	0.927032	0.739696
CKAP5	0.0894758	1.88879	0.292345
CKB	-0.0981411	-0.0506617	-0.866583
CKM	-0.0553193	-2.47225	-2.0633
CKMT1A	0.599002	3.54585	0.567456
CLASP1	0.102457	2.23043	0.139151
CLC	-0.0543389	-0.428172	-0.340606
CLCN7	-0.15114	1.16048	0.362335
CLDN18	-0.467065	-1.81039	-1.99261
CLDN7	0.296309	-0.516394	-0.198465
CLEC14A	-0.0841951	-3.96301	-1.22401
CLEC3B	-0.35378	-0.334675	-0.916998
CLIC1	0.184918	2.31232	0.256113
CLIC2	-0.287564	-1.30026	-0.969765
CLIC3	0.355733	-0.513777	-1.10426
CLIC4	0.0745683	0.987405	-0.458812
CLIC5	-0.187364	-3.74268	-2.09296
CLIC6	0.481471	1.37714	0.971606
CLINT1	0.156927	1.1576	0.304099
CLIP2	-0.200375	1.04277	-0.315398
CLPB	0.193611	0.579642	0.10547
CLPP	0.39584	1.01765	0.202493
CLPTM1L	0.404663	2.02605	0.386173
CLTA	0.364524	0.564939	0.282084
CLTB	0.227454	-0.0234265	0.0586108
CLTC	0.193611	0.411331	-0.0222981
CLU	-0.45341	-0.718154	-0.567125
CMA1	0.426265	-1.70357	-0.876479
CMPK1	0.503252	3.25326	0.308034
CNBP	0.314249	1.96437	0.679025
CNDP2	0.101993	1.98006	-0.0376131
CNIH4	0.178671	0.629573	-0.23601
CNN1	-0.159875	-0.485922	-1.12143
CNN2	0.23669	1.6494	0.0941018
CNN3	0.116441	1.5599	-0.0156157
CNNM4	0.269119	0.0384482	0.219727
CNOT1	-0.0596399	1.30111	0.236332
CNOT2	0.65545	0.625774	0.198377
CNOT3	0.3978	0.619255	0.237494
CNP	0.296745	0.467275	0.0619961
CNPY3	-0.0134653	0.869106	0.335458
CNRIP1	-0.257481	-0.584389	-1.08406
COA3	0.676744	0.868545	0.479674
COA7	0.185883	1.92938	0.529198
COASY	-0.23423	2.10442	0.131157
COBL	-0.600405	0.42811	-0.602605
COBLL1	-0.165611	0.272526	-0.613491
COG1	0.0447346	1.262	0.386252
COG4	0.182473	0.509439	0.408313
COG6	0.232294	2.20697	0.305229
COG8	0.329396	2.41238	0.254329
COL12A1	-0.372345	-0.303761	0.361773
COL14A1	-0.418966	-0.65045	-0.612909
COL15A1	-0.174297	-1.54058	-0.57496
COL18A1	-0.215397	-1.6509	-0.750923
COL1A1	-0.161751	-0.638196	1.09307
COL1A2	-0.230358	-1.05487	0.66143
COL21A1	-0.580956	-2.41657	-0.39736
COL3A1	-0.576952	-1.16137	0.991357
COL4A1	0.0399238	-2.22972	-0.882872
COL4A2	-0.164646	-2.21494	-0.685733
COL4A3	-0.0293407	-3.25746	-0.839416
COL4A4	-0.305059	-3.05448	-1.17299
COL5A1	0.110198	0.00415436	0.822981
COL5A2	-0.149211	-0.895593	0.85185
COL6A1	-0.437501	-1.87939	-0.610764
COL6A2	-0.321063	-1.96554	-0.619757
COL6A3	-0.364524	-1.75181	-0.535846
COL6A5	-0.373323	-4.26085	-1.2437
COL6A6	-0.479493	-4.00611	-1.72321
COL8A1	-0.43455	0.627136	0.417134
COLEC12	0.0938239	-0.965228	-0.355486
COLGALT1	0.271499	0.953073	0.190465
COMMD1	0.189296	1.15394	-0.0802837
COMMD10	-0.0245305	0.69705	-0.240555
COMMD2	0.152105	-0.239121	-0.314476
COMMD5	0.153577	1.21852	-0.296995
COMMD8	0.392344	0.918618	-0.135135
COMT	0.210042	-0.246627	-0.0903517
COMTD1	0.300734	0.306137	0.0740015
COPA	0.51615	1.97288	0.469279
COPB1	0.345542	2.15783	0.396997
COPB2	0.440602	2.02816	0.408896
COPE	0.368434	1.89866	0.269459
COPG1	0.471174	2.26362	0.417684
COPG2	0.56995	2.99009	0.287489
COPS2	-0.0211599	1.30362	-0.169531
COPS3	0.214358	1.09262	-0.0480997
COPS4	0.143426	1.01071	-0.186714
COPS5	0.046659	1.42866	-0.184798
COPS6	-0.440602	1.59319	-0.222608
COPS7B	-0.114976	0.0794179	0.182398
COPS8	0.0894758	1.11105	-0.326626
COPZ1	0.447497	2.15572	0.328958
COQ5	0.123646	-0.2769	-0.307503
COQ9	0.423316	0.135377	-0.0495302
CORO1A	0.0504911	1.73639	0.0499888
CORO1B	0.0346263	1.52473	0.0689921
CORO1C	-0.14774	-0.17751	-0.423388
CORO7	0.163226	2.69306	0.086662
COTL1	0.255542	2.19383	-0.0984823
COX15	0.0129865	0.789742	0.254208
COX17	0.486416	1.49154	0.780798
COX20	0.536033	1.01183	0.210569
COX4I1	0.310462	0.441571	0.392759
COX5A	0.513172	0.095414	0.4042
COX5B	0.374301	0.195689	0.314107
COX6B1	0.28703	0.208179	0.189809
COX6C	0.414476	0.208722	0.355279
COX7A2	0.398357	0.118435	0.288448
COX7A2L	-0.0452081	0.434636	0.38024
COX7C	0.252108	0.326541	0.296051
CP	-0.72774	-0.202591	-0.547261
CPA3	0.736966	-1.75492	-1.13036
CPM	0.217779	-0.37194	-0.143418
CPN1	-0.667217	-0.501827	-0.910369
CPNE2	-0.0731122	-1.93654	-0.351921
CPNE3	0.20469	-0.0913406	-0.0924149
CPPED1	-0.0894758	2.18062	-0.386009
CPSF1	0.399203	1.19638	0.227297
CPSF2	0.485427	1.46529	0.24508
CPSF3	0.170436	1.01227	0.338894
CPSF6	0.316735	1.09468	0.49569
CPSF7	-0.137641	1.04487	0.317008
CPT1A	-0.0538669	-0.372641	0.060597
CPT2	0.321603	1.07424	0.190184
CPVL	0.525499	0.764783	-0.320909
CRABP2	0.808867	4.20774	1.45974
CRAT	0.105845	0.983935	0.167213
CREB1	0.134749	0.0709374	-0.0661077
CRELD1	-0.192645	-0.306804	0.161201
CRIP1	0.553377	0.715023	-0.327753
CRIP2	0.114514	-0.109716	-0.628859
CRK	0.0625266	1.14775	-0.350455
CRKL	-0.725439	1.22773	-0.201352
CRLF3	-0.0365502	2.18617	-0.13956
CRMP1	-0.0149055	-0.341997	-0.768145
CROCC	0.108734	-0.980869	-0.683308
CROT	0.197476	1.56409	0.0108475
CRTAC1	-0.380171	-2.3904	-1.02285
CRYAB	-0.204241	-1.61761	-1.18944
CRYL1	-0.212943	1.27717	-0.454929
CS	0.41111	0.653143	0.0985002
CSDE1	0.386044	1.90638	0.264921
CSE1L	0.298789	1.09804	0.345111
CSK	0.0125034	1.96303	-0.0345077
CSNK1A1	-0.092364	0.256171	0.0959754
CSNK1G3	-0.0394361	-1.0024	-0.39732
CSNK2A1	-0.218299	0.165929	0.196361
CSNK2A2	0.0201981	-0.215493	-0.0634771
CSNK2B	0.105346	-0.096936	0.132241
CSPG4	-0.235198	-2.98264	-0.721853
CSRP1	0.0639806	0.0782788	-0.611903
CSRP2	0.304087	0.983472	-0.236986
CSTB	0.288001	2.17657	0.144672
CSTF2	0.621916	1.28909	0.509211
CTBP1	0.0654134	1.5182	-0.0485046
CTBS	0.186849	0.730332	-0.362878
CTCF	-0.054829	-0.291424	-0.0940647
CTNNA1	0.0615643	-0.546983	-0.0499601
CTNNB1	0.0115416	-0.669578	-0.159559
CTNND1	0.0298168	-0.503452	-0.188511
CTPS1	0.279795	3.46542	0.116998
CTR9	0.00240409	2.00196	0.274775
CTSA	0.375279	1.48686	0.220248
CTSB	0.7744	1.93248	0.465916
CTSD	0.184918	1.13287	-0.262505
CTSE	0.700148	1.97269	0.384391
CTSG	-0.0423221	-1.48779	-0.461164
CTSH	0.425701	1.47815	-0.622455
CTSL	0.403124	1.48069	-0.139274
CTSZ	0.696072	1.17157	0.0450465
CTTN	0.392476	1.79313	0.505699
CTTNBP2NL	0.209594	-1.17693	-0.181409
CUL1	-0.449468	2.13506	0.142171
CUL2	0.142462	1.99809	-0.0254574
CUL4A	0.225519	1.88982	0.132441
CUL4B	0.289069	2.65405	0.505659
CUL5	0.0870835	0.964287	-0.136984
CUTA	0.478918	2.47771	-0.161059
CUTC	0.235198	0.899577	-0.392681
CUX1	0.157892	0.801757	0.36703
CXCL17	0.0495457	0.0103861	0.0852967
CYB5A	0.520708	-0.716728	-0.552098
CYB5R1	0.495325	0.147742	0.162819
CYB5R3	0.0904385	-0.613393	-0.470447
CYBB	-0.467224	-0.0342668	-0.112107
CYBRD1	0.241008	-1.79732	-1.21045
CYC1	0.0553193	0.505807	0.153528
CYCS	0.512179	1.43067	0.743292
CYFIP1	0.0322269	-0.0912861	-0.200138
CYP1B1	0.684874	1.60049	0.451011
CYP20A1	0.471588	-0.176559	-0.202809
CYP27A1	-0.491365	-0.681572	-0.740138
CYP2S1	-0.257481	-0.166858	-0.122683
CYP51A1	0.170436	-0.678286	-0.409725
CYP7B1	0.483449	0.261339	0.238257
CYTH2	-0.0192362	1.26216	0.125178
DAB2	0.104383	0.48294	-0.216337
DAB2IP	-0.601409	-1.8492	-0.641567
DAD1	0.131858	0.960272	0.0141366
DAG1	-0.214429	-1.86967	-0.647379
DAP	0.76989	2.88005	0.601497
DAP3	-0.386044	1.53737	0.464017
DAPK1	-0.0129822	0.408245	-0.302563
DAPK2	0.0942896	0.914134	-0.674147
DARS	0.243914	1.30186	0.374024
DARS2	0.412934	1.246	0.209888
DAZAP1	-0.238103	1.21899	0.126111
DBI	0.380171	1.9123	-0.200785
DBN1	0.0740746	0.132014	0.2406
DBNL	0.297717	1.19859	0.018792
DBT	0.489797	-0.0308699	-0.0358079
DCAF7	0.176228	1.03197	0.209606
DCK	0.507628	2.55084	0.333625
DCN	-0.733504	-1.84858	-1.21036
DCPS	0.0471322	2.66114	0.102902
DCTD	-0.0100972	2.55767	0.362554
DCTN1	0.143426	-0.303742	-0.251712
DCTN2	0.0654134	-0.230571	-0.269099
DCTN3	0.0649431	-0.150994	-0.368469
DCTN4	0.0346263	0.0408939	-0.15952
DCXR	0.136218	0.868515	-0.297954
DDAH1	0.585964	1.11618	-0.071237
DDAH2	-0.0471322	-1.16613	-0.728353
DDB1	0.232817	0.945434	0.146321
DDI2	-0.46073	0.710517	-0.536813
DDOST	0.471588	0.630046	0.2962
DDRGK1	-0.0471322	0.601664	0.187015
DDT	-0.175716	2.16139	-0.208384
DDX1	0.363547	1.00486	0.227248
DDX17	0.320197	1.45979	0.26927
DDX18	0.233707	1.27315	0.612659
DDX19B	0.165611	1.52033	0.258785
DDX21	-0.114051	2.65156	0.831938
DDX23	0.350304	0.83988	0.484836
DDX24	0.848895	1.89322	0.614979
DDX27	0.342615	1.58221	0.675054
DDX39A	0.0168344	2.72526	0.235889
DDX39B	0.44636	1.58079	0.189621
DDX3X	0.270089	1.83577	0.550498
DDX41	0.160786	1.86439	0.326788
DDX42	0.255542	1.65584	0.244439
DDX46	0.399338	1.68568	0.390234
DDX5	0.352804	1.73601	0.467803
DDX58	0.051453	3.1577	0.0821193
DDX6	0.202825	1.09474	0.224219
DDX60	0.0529047	-0.174109	-0.266477
DECR1	0.339144	0.287994	-0.0530627
DEK	0.482047	1.03348	0.299894
DENR	0.358662	1.97389	0.420193
DEPTOR	0.141497	2.55234	0.51946
DERA	-0.139569	0.187166	-0.316204
DES	-0.315762	-2.43806	-1.58736
DFFA	0.432164	2.75726	0.0676485
DHCR24	0.436665	3.07478	0.597372
DHCR7	0.422334	0.885554	-0.0538713
DHODH	-0.0644511	0.529179	0.191376
DHRS1	0.224105	0.1758	-0.127364
DHRS7	-0.099104	0.425039	0.190596
DHX15	0.322577	1.33181	0.224999
DHX29	0.290478	0.542075	0.393788
DHX30	0.215325	1.1359	0.137251
DHX38	-0.25942	1.11743	0.0495799
DHX9	0.337738	0.675596	0.21102
DIABLO	0.576952	0.729725	0.141059
DIAPH1	0.283679	1.57192	0.0899861
DIAPH2	0.11305	0.604116	-0.473183
DIP2B	0.185883	0.581947	-0.235343
DIS3	0.171912	3.20099	0.231767
DKC1	0.507801	1.34036	0.783264
DLAT	0.0254925	-0.0535141	0.0446197
DLD	0.628787	0.129929	-0.0147667
DLG1	0.197992	0.346379	-0.0280869
DLG3	0.168506	2.40814	0.149947
DLST	0.386468	-0.0180829	0.0215304
DMAP1	-0.51177	0.914494	0.201915
DMD	0.0221218	-2.52074	-0.907472
DMTN	-0.82486	-3.66991	-1.31439
DNAJA1	0.295773	1.06601	0.310399
DNAJA2	0.191164	0.922929	0.215266
DNAJA3	0.587969	1.24781	0.508597
DNAJB1	0.182534	1.42205	0.127967
DNAJB11	0.313381	1.29314	0.510431
DNAJB2	0.214877	0.287571	-0.291192
DNAJB4	-0.0485672	-1.38664	-0.735999
DNAJC10	0.525091	1.47484	0.604942
DNAJC11	0.290478	0.396852	0.422343
DNAJC13	0.0942896	0.0769194	-0.0517207
DNAJC3	0.566355	2.00013	0.69407
DNAJC5	0.125573	0.188857	0.303686
DNAJC7	0.418404	2.40131	0.418153
DNAJC8	0.50086	2.29193	0.234192
DNAJC9	0.009618	1.33063	0.150101
DNASE2	0.324093	2.01499	0.32766
DNM2	0.0144271	0.801661	-0.0803205
DNPEP	-0.0538669	0.0953909	-0.560706
DNPH1	-0.189747	2.31415	0.0981537
DNTTIP1	0.0610934	0.465412	0.0496017
DOCK1	-0.125573	0.0751631	-0.208839
DOCK11	0.150176	-0.577016	-0.374108
DOCK2	0.0259692	0.746063	-0.151255
DOCK4	-0.229912	-2.11487	-0.776829
DOCK6	-0.0192362	0.398721	-0.326865
DOCK9	-0.0158672	-1.50489	-0.482292
DOK2	0.0375122	0.621251	-0.389813
DOK3	0.025484	2.32248	-0.043783
DPAGT1	0.63585	0.360916	0.293981
DPF2	0.0403981	0.432621	0.188548
DPM1	0.152561	0.531049	0.163279
DPP3	0.099104	3.82155	0.247418
DPP4	0.609446	1.97045	0.30652
DPP7	0.206175	1.50189	-0.104187
DPP9	0.335244	3.04465	0.0639982
DPT	0.163681	-2.43264	-1.02478
DPYD	0.576353	0.418338	0.530688
DPYSL2	0.0889796	-0.374364	-0.781565
DPYSL3	-0.180089	0.776585	-0.0521813
DPYSL4	0.0567533	0.23298	-0.413782
DRG1	-0.090935	3.21161	0.415995
DRG2	0.267709	3.14769	-0.0142905
DSC2	0.757138	0.818121	0.693418
DSG2	0.493177	1.41109	0.61412
DSP	0.662932	2.48209	1.15023
DST	-0.286592	-1.03024	-0.656758
DSTN	0.265679	1.23698	-0.25336
DTD1	-0.0606021	1.66719	-0.425408
DTNB	0.211009	-0.60804	-0.212881
DTNBP1	0.131858	1.41375	0.34137
DTX3L	-0.0755309	1.96484	0.572292
DTYMK	0.445944	1.76189	0.232348
DUSP23	-0.0423221	2.57995	0.180987
DUSP3	-0.105381	1.90102	-0.146634
DUT	0.170436	-0.148561	-0.016349
DVL2	0.154998	1.13459	-0.00378568
DYNC1H1	0.0370374	0.0425697	-0.0536651
DYNC1I2	0.134749	0.080183	-0.179508
DYNC1LI1	-0.167541	0.23322	-0.0429753
DYNC1LI2	0.248232	0.15491	-0.041566
DYNLL1	-0.0625266	-0.327346	-0.049176
DYNLL2	0.390385	-0.532736	-0.101663
DYNLRB1	0.141039	0.00480764	-0.0116437
DYNLT1	0.273971	0.668843	0.258327
DYSF	-0.370389	-2.30087	-0.587565
EBNA1BP2	0.312842	1.43124	0.543288
ECH1	0.418404	0.3891	0.0113859
ECHDC1	-0.0577155	0.811218	-0.680062
ECHDC3	0.28703	0.251961	-0.331053
ECHS1	0.504825	0.681919	0.226316
ECI1	0.290041	0.610166	-0.237582
ECI2	0.188781	0.34253	-0.0877643
EDF1	0.477103	2.79342	0.626333
EDNRB	-0.288535	-1.62885	-1.32494
EEA1	0.0230836	-0.0215257	-0.124418
EEF1A1	0.498297	1.77288	0.198155
EEF1B2	0.32788	1.45125	0.356029
EEF1D	0.357686	1.60961	0.562933
EEF1E1	0.477103	0.877229	0.470086
EEF1G	0.3929	1.9588	0.265417
EEF2	0.341094	2.55973	0.413784
EFEMP1	0.12993	-0.328586	-0.292999
EFEMP2	0.269209	-0.417676	-0.184628
EFHD1	-0.0149055	1.60138	-0.0710356
EFHD2	-0.0100972	1.64267	0.205317
EFTUD2	0.222169	0.579538	0.209485
EGFR	0.212943	0.160713	0.258359
EGLN1	0.367456	2.83309	0.652911
EHBP1L1	0.203792	1.68422	-0.137687
EHD1	-0.304087	-1.02558	-1.08903
EHD2	-0.4706	-2.30033	-1.89249
EHD3	-0.749673	-2.53041	-1.50868
EHD4	-0.231326	-0.781939	-0.912596
EIF1	0.244439	1.14373	0.222119
EIF1AX	0.404241	0.867157	0.0738622
EIF2A	0.227454	3.75456	0.504477
EIF2AK2	0.306032	2.19367	0.273183
EIF2B1	0.369412	2.81517	0.203551
EIF2B3	0.0384741	2.17295	0.242234
EIF2B4	0.211976	2.37687	0.14516
EIF2B5	0.290478	2.31812	0.20643
EIF2S1	0.387023	1.11662	0.401986
EIF2S2	0.190262	1.46109	0.541925
EIF2S3	0.202308	1.13376	0.445334
EIF3A	0.142462	0.907355	0.306227
EIF3B	0.156419	1.04761	0.190054
EIF3D	0.159366	1.28383	0.178676
EIF3E	0.22939	0.870923	0.141162
EIF3F	0.148704	0.77269	0.0863229
EIF3G	0.242945	1.24337	0.387797
EIF3H	0.0711874	0.918111	0.199804
EIF3I	0.2551	1.08136	0.28841
EIF3J	-0.0572249	1.4984	0.366594
EIF3K	-0.0341511	1.01421	0.0878657
EIF3L	0.109234	0.862217	0.185693
EIF3M	0.414476	0.996004	0.210594
EIF4A1	0.364524	2.52921	0.366078
EIF4A2	0.193096	1.45271	-0.193685
EIF4A3	-0.154998	0.554927	0.162306
EIF4B	0.315762	1.9379	0.396398
EIF4E	0.280766	1.82556	0.244427
EIF4E2	0.200375	1.04066	0.201109
EIF4G1	0.525091	2.37916	0.575374
EIF4G2	0.197476	1.77723	0.219908
EIF4H	0.489385	2.09921	0.236027
EIF5	0.423736	2.45764	0.408143
EIF5A	0.124609	1.85759	-0.067643
EIF5B	0.228422	3.05523	0.581769
EIF6	0.422334	1.34772	0.367405
ELANE	-0.0567533	-0.998333	-0.399368
ELAVL1	0.367883	1.42382	0.151287
ELMO1	-0.0639593	-0.525333	-0.438965
ELMO2	0.0851295	0.000389478	-0.190465
ELN	-0.343045	-1.40841	-0.720834
EMC1	-0.0355883	0.625953	0.208201
EMC10	0.233707	0.571819	0.317559
EMC3	-0.123687	0.788811	0.235955
EMC4	0.212495	0.0878249	0.215924
EMC7	0.233785	0.297943	0.152839
EMD	0.396397	0.324609	0.206084
EMILIN1	-0.210042	-0.663826	0.260883
EMILIN2	-0.19213	-0.701473	-0.0800671
EML1	-0.437083	-1.64294	-1.26117
EML2	0.287126	2.05475	-0.199991
EML3	0.339258	1.10255	-0.165849
EML4	0.404241	3.06146	0.453569
ENAH	0.326041	-0.11313	0.104981
ENDOD1	0.0471322	-0.865328	-0.129011
ENG	0.0105798	-0.752998	-0.352683
ENO1	0.830075	2.95642	0.165065
ENO2	-0.0197139	2.14107	-0.376542
ENOPH1	0.186849	2.46374	-0.0753251
ENOSF1	0.12176	0.417688	-0.261758
ENPEP	-0.137182	-3.31609	-1.01273
ENPP4	0.54998	-0.115259	-0.0761447
ENSA	0.419387	2.5262	0.272336
ENTPD1	-0.154998	-1.4939	-0.552625
ENY2	0.338599	0.910296	0.176562
EPB41	-0.518136	-2.1263	-0.932244
EPB41L1	0.26039	-0.371451	-0.125267
EPB41L2	-0.260918	-1.91039	-0.946806
EPB41L3	0.0798495	-1.10269	-0.307258
EPB42	-0.830743	-3.68975	-1.39487
EPCAM	0.574951	0.1952	0.549331
EPDR1	1.06837	1.4812	0.207031
EPHX1	0.0706944	-0.313318	-0.117549
EPHX2	0.490375	0.714226	-0.668007
EPN1	0.080812	-0.226864	-0.232909
EPN2	-0.109698	-1.48742	-0.42073
EPPK1	0.0538669	0.675826	-0.0608968
EPRS	0.381149	1.21714	0.540272
EPS15	-0.197026	0.0405146	-0.174525
EPS15L1	-0.16896	0.239441	-0.118507
EPS8	0.406625	1.58352	0.149109
EPS8L2	0.0865877	0.160599	-0.23898
EPX	-0.264269	-1.71631	-0.305854
ERAP1	0.268589	0.536453	-0.0150287
ERAP2	0.0918673	-0.0615946	-0.22357
ERBB3	0.256512	0.693452	-0.0449491
ERC1	0.211976	1.30651	-0.150765
ERGIC1	0.456784	0.940485	0.530593
ERH	1.00216	0.862197	0.192896
ERLEC1	-0.0716805	0.889976	0.434895
ERLIN1	0.176228	-0.585907	-0.0553414
ERLIN2	0.290478	-0.262019	-0.0995471
ERMP1	-0.0543389	-0.490915	-0.0419314
ERP29	0.307439	0.876324	0.24457
ERP44	0.365502	0.605804	0.393882
ESAM	-0.295337	-3.63222	-1.2351
ESD	-0.117866	1.17069	-0.466523
ESRP1	0.119832	0.895791	0.982635
ESYT1	0.101993	-0.512186	-0.2402
ESYT2	0.191679	-0.528091	0.0409997
ETF1	0.511187	2.33861	0.316967
ETFA	0.488973	0.45109	0.180586
ETFB	0.32301	0.715209	0.0751419
ETFDH	0.442989	0.376766	0.121424
ETHE1	0.115477	0.303763	-0.102792
EVI2B	0.117404	0.303475	0.045373
EVL	-0.0221218	0.926785	-0.254947
EVPL	0.238547	-1.06713	-0.615513
EWSR1	0.455798	0.730251	0.0901259
EXOC1	0.0851295	-0.158307	-0.103509
EXOC2	0.06877	0.00324037	-0.0980694
EXOC3	-0.00288539	0.164516	-0.0793449
EXOC5	0.137136	0.0528574	-0.124303
EXOC7	0.108771	0.13829	-0.188955
EXOC8	0.207141	-0.167693	-0.133162
EXOSC10	0.0851295	1.48096	0.168469
EXOSC2	0.575549	0.868741	0.15758
EXOSC6	0.0370374	-1.68019	0.220786
EXOSC7	0.00528901	1.12787	0.213076
EXOSC9	0.104882	0.680791	0.0563089
EZR	0.121258	0.298557	-0.0373314
F11R	0.238627	-1.75912	-0.338298
F12	-0.385065	-0.438866	-0.682607
F13A1	0.184404	0.528962	-0.33402
F2	-0.514748	-0.124518	-0.723097
F8A1	0.210042	1.43239	0.0953263
F9	0	-0.672521	-1.12186
FAAH	0.0697555	0.387708	-0.247083
FABP3	0.521524	3.10882	-0.118178
FABP4	-0.496316	-1.23123	-1.80302
FABP5	-0.0846624	0.813489	-0.694409
FABP7	0.966949	2.51683	0.615196
FAF1	0.0875504	0.371495	0.0338902
FAF2	0.358662	0.854119	0.530081
FAH	0.155455	2.06412	-0.22305
FAHD1	0.499698	0.532932	-0.132389
FAM107B	0.168051	2.21027	0.298321
FAM114A1	0.445944	2.12177	0.453631
FAM114A2	0.282708	2.348	0.0662123
FAM120A	0.285621	0.590288	0.210788
FAM120C	0.469199	0.419501	-0.0368348
FAM136A	0.109698	2.00919	0.96061
FAM3C	0.729789	1.59806	0.795504
FAM49B	0.175716	1.99554	0.241487
FAM83H	-0.248232	2.80382	0.382905
FAM91A1	0.314789	2.45612	0.435504
FAM98B	0.201342	0.775303	-0.0187858
FARP1	-0.208626	-1.27141	-0.410764
FARSB	0.121258	1.46866	0.28904
FAS	-0.0182744	-1.23989	-0.234837
FASN	-0.0952525	2.14438	-0.142739
FBL	0.449884	0.832657	0.599073
FBLIM1	0.0995689	1.52725	0.123877
FBLN1	-0.0952525	-0.238442	-0.418834
FBLN2	-0.234675	-0.29531	-0.0384727
FBLN5	0.00577079	-1.26457	-0.784378
FBN1	0.344566	-0.709857	0.125541
FBN2	-0.309385	-1.11118	-0.0516546
FBP1	0.468625	1.5086	-1.01352
FBP2	0.595592	1.42252	-0.8119
FBXO7	-0.621122	-0.211078	-0.874751
FCER1G	0.123646	0.450967	0.153569
FCGR3A	-0.255542	-0.0873563	-0.282285
FCGRT	-0.136218	-0.950396	-0.590463
FCHO2	0.321063	0.333186	-0.0786842
FCN3	-0.594988	-2.25048	-1.31505
FDPS	0.45777	2.24921	-0.0987967
FDX1	0.559958	0.311697	-0.115551
FDXR	0.421914	1.22802	0.0987783
FECH	-0.120756	0.19057	-0.0366662
FEN1	-0.0432841	4.28108	0.79226
FERMT2	-0.264269	-0.481444	-0.980446
FERMT3	-0.360067	1.66073	-0.231258
FETUB	-0.533047	-0.571972	-0.871929
FGA	-0.696702	-0.999968	-0.953049
FGB	-0.545993	-0.810306	-0.92314
FGD4	0.350851	1.03524	-0.400453
FGD5	0.00192359	-1.31571	-0.806061
FGF2	0.111624	-2.5251	-1.33039
FGG	-0.606033	-0.648509	-0.971146
FGL2	-0.293393	-1.72076	-0.456699
FGR	-0.234675	1.07307	-0.537533
FH	0.521116	0.888443	0.137144
FHL1	0.0774303	-1.79991	-1.76883
FHL2	0.34847	2.50533	1.34919
FHOD1	0.0812798	-0.745177	-0.433725
FIBP	-0.116441	-0.314261	-0.189834
FIP1L1	0.1381	0.825835	0.442635
FIS1	0.221648	0.525164	-0.00125324
FKBP10	0.395283	3.33381	0.871315
FKBP11	0.3929	2.1473	1.0295
FKBP1A	0.106309	1.78492	-0.347175
FKBP2	0.143884	1.17751	0.358783
FKBP3	0.769508	2.83135	0.632507
FKBP4	0.184466	3.00886	0.513372
FKBP5	0.123185	1.80282	0.143763
FKBP7	0.18498	0.976638	0.260953
FKBP8	0.179577	0.352099	0.111037
FKBP9	0.25017	1.35772	0.497105
FLII	0.100532	-0.383974	-0.229324
FLNA	0.00913558	-0.301083	-0.55014
FLNC	-0.211009	-1.43118	-0.782085
FLOT1	0.26039	-0.786599	-0.130254
FLOT2	0.208108	-0.795547	-0.149165
FMNL1	0.175774	0.737905	-0.0711906
FMO3	-0.0533947	-0.306237	-0.306443
FMO5	0.835965	1.70214	-0.0411588
FMOD	-0.00913558	-0.376554	-0.257649
FN1	0	0.0305972	-0.0472375
FN3K	-0.140533	0.798285	-0.323344
FN3KRP	0.0822696	1.10081	-0.252627
FNBP1	0.0447197	1.24719	-0.199146
FNTA	-0.217779	2.01914	-0.135385
FOLR1	0.613679	-0.954277	-0.254683
FOLR2	-0.0711874	-0.724275	-0.387419
FOXO1	0.027893	0.361122	-0.240178
FRYL	-0.157892	-0.174851	-0.154614
FSCN1	-0.209075	1.70762	-0.166984
FTH1	0.304624	0.869687	-0.263258
FTL	0.307439	0.547165	-0.641375
FTO	0.0480943	2.78068	0.0848043
FUBP1	0.425282	1.81192	0.431877
FUBP3	0.765115	1.1894	0.233226
FUCA1	1.05261	2.68182	0.549769
FUCA2	0.124148	1.29997	0.4199
FUNDC2	0.343045	0.58203	0.432592
FUS	0.587568	0.658391	0.214202
FXN	0.0519426	0.693512	0.0672642
FXR1	0.281298	0.996058	0.276181
FYCO1	0.209075	-0.152872	-0.196515
G3BP1	0.231771	2.16745	0.487455
G3BP2	0.6312	1.98322	0.487173
G6PD	0.0663757	2.44765	0.141734
GABARAPL1	-0.0942896	-0.273403	-0.109193
GABPA	0.181055	1.03937	-0.142365
GAK	0.141039	2.353	0.253662
GALE	0.764733	4.08095	0.395364
GALK1	0.0653916	1.74465	-0.0696932
GALM	0.308516	2.66264	0.231873
GALNT12	0.122723	0.965857	-0.0942921
GALNT2	0.616486	2.25742	0.63956
GALNT3	0.819649	3.3618	0.74506
GALNT7	0.55896	3.53163	0.908439
GALT	0.132822	1.13184	-0.368018
GANAB	0.444959	0.826176	0.189297
GAPDH	0.122221	2.18736	0.171783
GAPVD1	-0.184466	1.72148	-0.166497
GAR1	0.551975	0.978521	0.745451
GART	0.144848	3.70623	0.512518
GBA	0.446929	2.07253	0.690644
GBE1	-0.0962153	2.23896	-0.176528
GBF1	0.429778	1.43061	0.253967
GBP1	-0.155963	2.02644	0.0958755
GBP2	0.00625065	2.54708	0.164242
GBP5	-0.415879	1.35748	0.449548
GC	-0.595388	0.91218	-0.80428
GCA	-0.0759995	0.0613048	-0.145627
GCC2	0.180089	2.10632	0.419368
GCDH	0.0904385	0.521951	0.102352
GCHFR	0.098639	1.96137	-0.550925
GCLC	-0.523511	3.03116	-0.468142
GCLM	-0.0947552	2.67658	-0.305713
GCSH	0.581556	0.760039	0.240171
GDAP1	-0.204241	1.53176	0.181403
GDI1	-0.00673259	1.54312	-0.195303
GDI2	0.107771	2.01702	0.0932268
GFM1	0.498708	1.74571	0.450158
GFPT1	0.452841	4.51171	0.846762
GGA1	0.215844	1.51236	-0.144769
GGA2	0.330371	1.7038	-0.204
GGACT	-0.621519	-2.69293	-0.166224
GGCT	0.593985	3.74856	0.742751
GGPS1	0.593985	2.82139	0.369812
GHDC	0.202308	0.531851	0.136386
GHITM	0.183952	0.189976	0.513243
GIGYF2	0.32063	1.92546	0.344545
GIMAP1	-0.104882	-1.8608	-0.814754
GIMAP4	-0.204241	0.75035	-0.490082
GIMAP7	-0.183952	-0.117709	-0.857315
GIMAP8	-0.388558	-1.7772	-1.19437
GIT1	-0.192581	0.000973772	-0.288144
GIT2	-0.0240455	0.769397	-0.125385
GK	0.300197	1.8628	0.157463
GLB1	0.54998	1.8498	0.421703
GLG1	0.488395	0.86582	0.493149
GLIPR2	-0.356161	-1.20108	-0.620565
GLO1	0.376257	2.28694	-0.0601836
GLOD4	0.0851579	1.75606	-0.193238
GLRX	0.0500184	1.77509	-0.0687313
GLRX3	0.132822	2.91014	0.405971
GLRX5	-0.387447	1.04983	0.285442
GLS	0.788876	1.31689	0.181696
GLUD1	0.171401	-0.459604	-0.294334
GLUL	0.0346263	2.12668	0.449781
GLYR1	0.349875	-0.0101927	0.0520323
GMDS	0.748262	4.19777	0.598842
GMFB	0.20766	1.86951	-0.0639039
GMFG	-0.046659	1.47123	-0.400928
GMPPB	0.386599	2.71229	0.16715
GMPR2	-0.0105798	2.4263	-0.0929431
GMPS	0.0851295	3.65805	0.425948
GNA11	-0.109234	-1.91864	-0.612246
GNA13	-0.149719	-1.16766	-0.27799
GNAI1	-0.505235	-2.29593	-0.664721
GNAI2	-0.0596399	-0.794155	-0.393105
GNAQ	-0.180542	-2.21491	-0.82939
GNAS	0.0336644	-0.992584	-0.356211
GNB1	-0.0639806	-0.870601	-0.442075
GNB2	0.218746	-1.04329	-0.392267
GNB4	0.0538669	-1.0604	-0.462996
GNG11	-0.469199	-3.4727	-1.77695
GNG12	0.136677	-1.09143	-0.384476
GNG2	0.0442461	-1.47933	-0.455499
GNG5	0.18537	-0.699611	-0.275949
GNG7	-0.117866	-1.30481	-0.528558
GNL1	0.208108	2.60834	-0.0792424
GNPDA1	0.307977	1.9799	-0.014089
GNS	0.239959	1.13166	0.152124
GOLGA3	0.0375122	1.60737	0.438132
GOLGA4	0.485015	1.88215	0.345947
GOLGA5	0.307977	1.86886	0.615713
GOLGB1	0.432583	1.31789	0.585323
GOLM1	0.640899	4.31133	1.3267
GOLPH3	0.355733	2.48781	0.791099
GOPC	0.265239	2.00816	0.347691
GORAB	0.863208	-1.51279	0.73892
GORASP2	0.906845	1.54658	0.398759
GOSR2	0.243914	0.901453	0.184703
GOT2	0.451855	0.327841	0.20589
GP1BB	-0.625152	-0.93115	-1.24005
GPC4	-0.322145	0.563509	0.245341
GPD1	-0.122221	1.02875	-1.56712
GPD1L	0.168051	0.895341	-0.417764
GPD2	0.299661	0.205554	0.109214
GPHN	0.319656	1.53184	-0.0597859
GPI	0.19696	2.70834	0.353822
GPNMB	-0.340549	-0.248487	-0.40966
GPR108	1.17236	1.23389	0.292896
GPRC5A	-0.39878	-2.74221	-1.22723
GPS1	0.1275	1.63547	-0.135715
GPX1	0.254131	1.38205	-0.0539148
GPX3	0.0644511	-1.05566	-0.769168
GPX4	0.408166	1.54527	0.191293
GRB2	0.163681	0.523379	0.0973448
GRHPR	0.560554	1.10747	-0.272934
GRIPAP1	-0.104882	2.12108	0.172524
GRN	1.06358	-0.327385	0.285119
GRPEL1	0.534449	0.930133	0.840873
GSDMD	0.415318	2.14422	-0.0934599
GSK3A	0.106808	1.06051	-0.0945396
GSKIP	0.197026	1.36678	0.673857
GSN	0.0832046	-0.0907717	-0.260244
GSPT1	0.407606	2.9834	0.475875
GSPT2	0.099104	0.670462	-0.0011317
GSR	0.600405	1.71032	-0.0601121
GSS	-0.0173125	2.89559	0.0484323
GSTK1	0.070225	0.850146	0.17605
GSTM1	0.145354	1.20908	-0.512127
GSTM2	-0.156419	1.16342	-0.72174
GSTM3	0.319116	1.43876	-0.725717
GSTO1	-0.115477	1.8842	-0.350611
GSTP1	0.359211	1.65558	-0.0281563
GSTZ1	0.679401	2.34921	0.189684
GTF2A2	0.166121	0.126592	0.192749
GTF2B	-0.221648	1.03254	0.164136
GTF2F2	0.288535	1.53535	0.348344
GTF2I	0.557367	1.60288	0.29582
GTF3C1	-0.770922	2.29236	0.351137
GTF3C2	-0.378214	1.23863	0.293404
GTPBP1	-0.249284	1.41194	-0.0328531
GTPBP4	0.146318	1.39884	0.394921
GUK1	0.447914	1.3655	-0.159306
GUSB	0.963365	2.2591	0.219499
GYG1	-0.0413601	-0.124671	-0.238852
GYPC	-0.333294	-2.35549	-0.91784
GYS1	-0.13383	0.690742	0.0353347
GZMH	-0.3978	-1.5591	-0.910056
H1FX	0.240484	-0.220746	-0.655924
H2AFV	0.106808	-0.442349	-0.154375
H2AFX	0.417422	-0.323668	0.0865617
H2AFY	0.246295	-0.476448	-0.0583388
H2AFY2	0.000961797	-0.376516	-0.0888464
H6PD	0.890285	0.325814	-0.0648539
HABP2	0.157892	-0.0269179	-0.580557
HACD2	0.712783	0.0312406	0.199268
HACD3	-0.183952	0.137582	0.0907918
HADH	0.715074	0.643585	0.0793931
HADHB	0.239071	-0.0707546	-0.0421031
HAGH	-0.0346263	1.35248	-0.379949
HARS	0.276882	2.15158	0.408716
HBA1	-1.20263	-0.226308	-1.70789
HBB	-1.34744	-0.299582	-1.74213
HBD	-1.01517	-0.787723	-1.7504
HBG1	-1.10594	-1.01502	-1.51593
HBS1L	0.195544	1.20087	0.168238
HBZ	-0.869888	-1.07602	-1.72268
HCCS	0.799239	1.40721	0.662387
HCFC1	0.324634	0.797176	0.180116
HCK	-0.264798	0.299339	-0.243465
HCLS1	0.00480899	1.91174	0.0505828
HDAC2	-0.0129865	0.671499	0.185782
HDAC6	0.0235606	1.98486	-0.0282582
HDDC3	0.312842	2.22458	-0.0667424
HDGF	0.775052	1.8167	0.484195
HDHD2	0.188781	1.48724	-0.501089
HDLBP	0.442005	2.43756	0.626595
HEBP1	0.0817746	0.781882	-0.483618
HEBP2	0.226486	1.95404	-0.0968205
HEXA	0.648368	2.2366	0.0650895
HEXB	0.52211	1.66342	0.155122
HEXIM1	-0.152561	1.7399	0.37161
HGS	0.251223	0.647599	-0.0255146
HIBADH	0.307439	0.774325	0.102193
HIBCH	0.420369	0.81171	0.0483995
HID1	0.703208	3.7068	0.651383
HINT1	0.101993	2.20117	-0.134746
HINT3	0.559958	0.022305	-0.115091
HIP1	0.35128	-0.597085	-0.301136
HK1	0.307977	0.789971	0.231203
HK3	0.0322162	2.38633	-0.271735
HLA-A	0.0812798	-0.45121	-0.0515117
HLA-B	0.00673259	-0.816337	-0.0849434
HLA-C	0.0519426	-0.455232	0.179101
HLA-DMB	1.01192	0.124331	0.0537443
HLA-DPA1	0.212495	0.167822	-0.180835
HLA-DPB1	0.405085	-0.257597	-0.188316
HLA-DQB1	0.28465	0.149106	-0.0619338
HLA-DRA	0.280766	-0.137312	-0.374717
HLA-DRB1	0.345542	-0.18143	-0.16909
HLA-DRB3	0.46369	-0.584789	-0.147988
HLA-DRB4	0.518136	-0.0184334	-0.282764
HM13	0.344021	1.35512	0.745279
HMBS	-0.279795	0.62612	-0.444779
HMCN1	0.19213	-0.976333	-0.144802
HMGA1	0.69976	2.85523	0.630279
HMGB2	0.331234	0.45078	0.0724621
HMGB3	0.287564	3.84839	1.39351
HMGCL	0.509203	0.897182	0.111499
HMGN1	0.748906	2.43722	0.562069
HMGN2	0.649997	1.55453	0.313553
HMGN3	0.980567	1.51439	0.0861197
HMGN4	0.421351	0.118197	-0.369515
HMGN5	-0.0418341	1.49938	-0.149264
HMOX1	0.0509805	-0.915745	-0.284391
HMOX2	0.603019	1.10509	0.340208
HNRNPA0	0.542413	1.53675	0.0548285
HNRNPA1	0.39584	1.83715	0.49821
HNRNPA2B1	0.544996	1.16253	0.218029
HNRNPA3	0.333294	0.613379	0.284393
HNRNPAB	0.548391	2.21817	0.645012
HNRNPC	0.514164	0.981813	0.456494
HNRNPD	0.587568	1.2997	0.464695
HNRNPDL	0.305059	1.07088	0.224434
HNRNPF	0.678775	1.27833	0.32919
HNRNPH1	0.330371	1.09237	0.250116
HNRNPH2	0.132362	1.11865	0.12349
HNRNPH3	0.0942896	0.379231	0.10019
HNRNPK	0.39486	1.38298	0.215187
HNRNPL	0.565952	1.16908	0.221821
HNRNPLL	0.0317406	2.13646	0.238579
HNRNPM	0.378214	1.3503	0.310327
HNRNPR	0.441438	0.949162	0.182043
HNRNPU	0.603019	1.36119	0.257166
HNRNPUL1	0.132362	1.53777	0.119993
HNRNPUL2	0.327448	0.886724	0.253381
HOOK3	-0.282708	0.429298	-0.172618
HOPX	0.471588	0.914096	-0.50252
HP	-0.995313	-0.60314	-0.685647
HP1BP3	0.431181	-0.257697	-0.377769
HPCAL1	0.0399105	-0.906727	-0.639605
HPGD	0.23423	1.41187	-0.597528
HPGDS	-0.728764	0.0978045	-0.556236
HPR	-0.900809	-0.856452	-1.09135
HPRT1	-0.318249	2.91048	0.274089
HPX	-0.562551	0.570513	-0.843376
HRAS	-0.362997	-0.519644	-0.370366
HRG	-0.52211	-1.14052	-0.696121
HS1BP3	0.140075	1.61588	-0.0264366
HSD17B10	0.355185	0.697913	0.176875
HSD17B11	-0.166576	-0.349914	-0.326346
HSD17B12	0.348899	-0.27857	0.00254423
HSD17B4	0.151597	-0.0676954	-0.471643
HSD17B8	0.759963	0.757629	-0.0449759
HSDL2	0.868157	0.0411073	-0.285821
HSP90AA1	0.310896	2.10255	0.292724
HSP90AB1	0.581958	2.20512	0.45521
HSP90B1	0.458341	1.15549	0.628884
HSPA12A	-0.496316	-2.16296	-1.06935
HSPA12B	-0.542598	-4.09145	-1.64025
HSPA14	0.471588	2.57585	0.607195
HSPA2	-0.3347	-0.391071	-0.620524
HSPA4	0.254046	1.58275	0.235106
HSPA4L	-0.0586777	1.70465	0.222447
HSPA5	0.619718	1.32429	0.601884
HSPA8	0.371367	1.09039	0.250705
HSPA9	0.549576	1.10934	0.60095
HSPB1	0.618499	1.35167	0.167636
HSPB6	-0.35128	-1.34868	-1.28019
HSPB8	0.241452	-0.784012	-0.588115
HSPBP1	0.0610934	1.83928	0.00899628
HSPD1	0.597999	1.2635	0.64311
HSPE1	0.830743	1.65835	0.661733
HSPG2	0.0683003	-1.78872	-0.517768
HSPH1	0.238103	2.65839	0.533622
HTATIP2	0.241533	1.73025	0.50456
HTATSF1	0.429214	2.0357	0.58756
HTRA1	-0.165611	0.671521	0.15456
HTT	0.166121	2.28198	0.0627388
HUWE1	0.206175	1.63172	0.295503
HYI	-0.0201981	1.27225	-0.669069
HYOU1	0.519537	1.50837	0.669687
IAH1	0.133786	2.4396	-0.124861
IARS	0.380171	1.35899	0.520229
IARS2	0.430197	0.925498	0.40401
ICAM1	-0.134245	-0.897042	-0.0784586
ICAM2	-0.104882	-1.97496	-0.818632
IDE	0.0957179	2.98177	0.444738
IDH1	0.688554	2.60442	0.289326
IDH2	0.681824	1.151	0.613353
IDH3A	0.419387	0.237383	0.00763574
IDH3B	0.253604	0.72375	0.0344952
IDH3G	0.375406	0.412392	-0.0190149
IER3IP1	0.197476	0.559708	0.203973
IFI16	0.0803442	1.75592	0.393807
IFI30	0.398223	0.428553	-0.356867
IFI35	0.222616	2.22171	0.317415
IFIT1	-0.388982	0.362766	-0.451186
IFIT3	-0.0663757	0.435179	-0.400297
IFT27	-0.165156	2.55035	0.272413
IGF2R	0.190713	0.278789	0.215735
IGFALS	-0.264269	-0.112591	-0.804802
IGHG1	-0.717506	0.975645	-0.565822
IGHM	-0.73594	0.328192	-0.723283
IGLL5	-0.505235	1.07724	-0.394852
IGSF8	-0.0206824	-1.82791	-0.257408
IK	0.371367	0.894336	0.364062
IKBIP	0.490375	0.941168	0.575279
IKBKB	0.054829	1.46055	0.101134
IKBKG	0.126076	1.02952	0.0298038
IL16	0.0986061	1.86577	-0.203651
IL18	-0.562551	1.83809	-0.0477291
IL33	-0.392344	-1.61111	-1.6129
ILF2	0.578954	1.12067	0.179541
ILF3	0.442572	1.06342	0.31046
ILK	-0.189747	-0.273883	-0.84069
ILVBL	0.341524	-0.0835987	-0.0208811
IMMT	0.309923	-0.0208704	0.0890036
IMPA1	-0.0394361	2.42031	-0.0224862
IMPA2	0.625152	2.18742	0.326867
IMPAD1	-0.316302	1.50486	0.436744
IMPDH2	0.17282	1.83187	0.326141
INF2	0.0865877	0.145812	-0.234121
INMT	-0.0379995	-1.03069	-1.4392
INPP5A	-0.242502	-2.42823	-0.733424
INPP5D	0.354756	1.62257	0.0243183
INPP5K	-0.199925	-0.823214	-0.416037
INPPL1	0.323984	2.24456	0.249342
IPO4	-0.0327025	4.58014	0.504407
IPO5	0.146825	1.92881	0.236174
IPO7	-0.0740993	2.84105	0.177081
IPO9	0.606639	3.41765	0.384235
IQGAP1	0.241452	0.685313	-0.114017
IQGAP2	0.0928299	0.679029	-0.346076
IRF2BP2	0.524097	1.55877	0.292065
IRGQ	0.233262	2.14393	0.178395
ISG15	0.156927	2.49814	0.55099
ISOC1	0.349875	1.28974	-0.265502
ISOC2	0.198442	0.373218	-0.0665561
ISYNA1	0.278824	1.54406	-0.126878
ITGA1	-0.209075	-2.42096	-0.720146
ITGA2	0.117905	0.0922251	0.203571
ITGA2B	-0.27159	-2.67022	-1.19942
ITGA3	-0.088017	-2.61275	-0.648679
ITGA5	0.0302927	-1.44787	-0.399322
ITGA6	0.122221	-1.67224	-0.587792
ITGAM	0.0620351	-0.411778	-0.13722
ITGAV	-0.0235606	0.118392	0.369176
ITGAX	-0.140533	0.165166	-0.121773
ITGB1	0.0731122	-1.44551	-0.254471
ITGB2	0.0904385	-0.0281546	0.0228221
ITGB3	-0.321603	-2.0934	-0.690655
ITGB5	0.10342	0.0701086	0.243881
ITIH1	-0.634227	0.151706	-0.74424
ITIH2	-0.650391	-0.0485929	-0.787607
ITIH3	-0.308516	-0.0861545	-0.78306
ITIH4	-0.633613	-0.710857	-0.974746
ITPA	-0.189747	2.82376	0.324758
ITPR1	0.112124	-1.01001	-0.406263
ITPR2	-0.0716566	0.82835	0.0703988
ITPR3	0.447497	0.779349	0.319929
ITSN2	0.22939	0.61179	-0.0936797
IVD	0.475126	0.316336	-0.185281
JAK1	-0.0630182	-1.42888	-0.408848
JUP	0.128967	0.00786533	0.377443
KANK1	-0.175774	-0.07626	-0.298348
KANK2	-0.275473	-1.84665	-0.966063
KANK3	-0.403124	-3.64785	-1.62927
KAT2A	0.288001	-0.926327	0.386673
KBTBD11	-0.24347	0.107987	-0.580255
KCNAB2	0.12507	0.589056	-0.496136
KCTD12	-0.253604	-0.487303	-0.575551
KCTD14	0.800557	0.00477253	-0.594417
KDM1A	0.669015	1.20474	0.225946
KDSR	-0.174297	-0.988291	-0.226866
KHDRBS1	0.468211	2.11473	0.28736
KHSRP	0.350851	1.2953	0.204282
KIAA0319L	0.432164	2.00468	0.713924
KIAA1143	0.253161	2.19891	0.126756
KIAA1217	-0.140028	-0.156686	0.0845886
KIAA1522	0.665581	2.6143	0.2809
KIF13A	0.27159	1.15592	-0.284818
KIF13B	0.0365502	1.07734	-0.0647401
KIF1C	0.268589	0.875313	-0.437981
KIF2A	-0.0519426	1.60356	0.316312
KIF5B	0.269119	1.02541	0.148057
KLC1	-0.100067	1.02725	-0.0639599
KLC4	-0.0201981	1.63712	-0.125167
KLKB1	-0.584362	-0.239874	-0.675626
KMT2B	0.137641	-0.952932	0.230701
KNG1	-0.669638	-0.158564	-0.791907
KPNA1	0.160786	1.21624	0.126582
KPNA3	-0.483449	0.423012	-0.0497285
KPNA4	-0.0259692	0.599627	-0.0730827
KPNB1	0.0288549	1.04544	0.0567676
KRAS	-0.428795	0.362005	-0.255856
KRI1	0.0663757	1.90136	0.627449
KRT1	0.0553193	-0.571945	-0.20222
KRT10	0.436099	-0.445928	-0.083762
KRT14	-0.383107	0.539854	0.461116
KRT15	0.620115	2.40755	0.336875
KRT17	0.12993	1.30302	0.633107
KRT18	1.01843	2.15563	0.478747
KRT19	0.656462	1.46453	0.413664
KRT4	0.105346	0.0841064	-1.54312
KRT5	-0.054829	0.862083	-0.788453
KRT7	1.04788	1.14718	0.231091
KRT72	0.0779245	0.0832917	-0.168842
KRT8	0.851664	1.99226	0.597953
KRT9	-0.251665	-0.449763	-0.104688
KTN1	0.402702	0.82577	0.205232
L3HYPDH	-0.592982	1.52137	-0.394768
LACTB	0.352804	0.286957	-0.158611
LACTB2	0.23423	3.11564	0.677751
LAD1	0.376257	4.16982	1.38087
LAGE3	-0.567548	1.88848	0.210334
LAMA2	0.0629972	-1.81633	-0.279114
LAMA3	-0.28465	-3.7095	-1.04192
LAMA4	-0.497886	-2.27763	-0.790799
LAMA5	-0.168051	-2.86694	-0.722039
LAMB1	-0.177193	-1.50825	-0.393664
LAMB2	-0.26374	-2.96694	-0.945521
LAMB3	-0.157383	-2.97939	-0.13422
LAMC1	-0.194577	-2.29758	-0.585527
LAMC2	-0.288535	-2.97146	-0.212299
LAMP1	-0.0519426	-0.153833	-0.129763
LAMP2	0.44636	0.559039	0.276541
LAMTOR1	0.111624	0.0537296	-0.230327
LAMTOR2	0.265768	0.0144571	-0.192705
LAMTOR3	0.280233	0.0418955	-0.289512
LAMTOR5	0.112587	0.314692	-0.0525527
LANCL1	0.0456815	-0.404097	-0.45515
LAP3	0.0139438	0.810508	-0.124197
LARP1	-0.285621	2.61991	0.435122
LARS	0.187815	1.19205	0.396806
LASP1	0.329939	0.962756	-0.124917
LBH	-0.305059	0.452766	-0.419361
LBP	-0.718528	-0.741532	-0.717798
LBR	0.152561	0.212978	0.101832
LCN2	-0.407606	-0.0522001	-0.325972
LCP1	-0.0399105	1.67747	-0.272107
LCP2	0.104882	2.22916	0.103367
LDHA	0.584963	3.16886	0.791584
LEMD2	0.542007	-0.319952	-0.0494909
LEMD3	0.257481	-0.155029	0.216627
LETM1	0.163226	0.845648	0.456886
LETMD1	-0.125615	0.857441	-0.0799659
LGALS1	-0.102956	-0.218048	-0.20388
LGALS3	0.421771	-0.0679289	-0.107567
LGALS3BP	0.606431	1.55443	0.516151
LGALS4	1.27778	5.93474	-0.268107
LGALS8	0.329939	0.0830512	0.308839
LGALS9	-0.495325	0.865818	0.085549
LGALSL	-0.472415	1.71726	-0.565226
LGMN	0.935917	1.76894	0.470946
LHPP	0.119832	2.55309	-0.0458902
LIG3	0.134749	1.07863	0.47751
LIMCH1	-0.0711874	-2.38319	-1.03778
LIMD1	0.06877	-1.75433	-0.577598
LIMD2	0.552568	1.36292	0.558721
LIMS1	0.115978	-0.124856	-0.590345
LIMS2	-0.118829	-1.39568	-1.04995
LIPA	-0.39976	-0.130541	-0.680657
LLGL2	-0.0274075	-0.724465	-0.603571
LMAN1	0.44102	0.999755	0.540747
LMAN2	0.431181	0.916088	0.533672
LMAN2L	0.269119	0.102555	0.1763
LMCD1	0.0764935	0.0334209	-0.802244
LMNA	0.617492	-0.107317	-0.144465
LMNB1	0.702188	0.459907	0.377888
LMNB2	0.107771	-0.930534	-0.377429
LMO7	-0.0981411	-1.17694	-0.781287
LMOD1	-0.241452	-1.83649	-1.08324
LNPEP	0.297281	-0.342257	-0.0142023
LONP1	0.307439	0.999287	0.400063
LPA	-1.42243	-1.85722	-0.727874
LPCAT1	0.580956	0.869795	0.22961
LPCAT2	0.400741	0.0963072	-0.0520069
LPCAT3	0.190713	-0.643994	-0.513351
LPIN2	-0.190198	2.62659	0.230381
LPP	0.0644511	-0.103678	-0.406651
LRBA	0.414897	3.03789	0.433754
LRG1	-0.384086	0.685233	-0.853939
LRMP	-1.40338	-2.30723	-0.197102
LRP1	0.0851295	-0.951102	-0.342774
LRPAP1	0.595992	0.807472	0.396572
LRPPRC	0.530063	1.33218	0.700287
LRRC40	0.166576	1.70574	-0.0288256
LRRC47	0.303114	1.24899	0.0762649
LRRC57	-0.142003	-0.776556	-0.683628
LRRC59	0.665973	1.62558	0.887998
LRRFIP1	0.19651	0.375849	-0.05453
LRRFIP2	0.0942896	-1.36646	-0.274729
LRRK2	0.17475	-0.193825	-0.775917
LSM2	0.120756	1.76716	0.27891
LSM3	0.11594	1.28357	0.206463
LSM4	0.707923	1.48031	0.279633
LSM6	0.437501	1.70242	0.448482
LSM8	0.440871	1.84963	0.00546569
LSS	-0.0697322	-0.354294	-0.35026
LTA4H	0.266209	1.81266	-0.223323
LTBP2	0.278292	-0.132406	-0.192878
LTBP4	-0.0110589	-2.00693	-0.728976
LTF	-0.335244	-1.52666	-0.393588
LUC7L	-0.15114	2.20698	0.450181
LUC7L2	0.55397	1.77115	0.241866
LUC7L3	0.567354	2.10444	0.544298
LUM	-0.608043	-1.09392	-0.996227
LXN	-0.429778	-0.50013	-0.340541
LYAR	0.135713	1.53949	0.145152
LYN	0.200308	0.200154	0.166994
LYPLA1	0.249727	2.67029	0.235068
LYPLA2	0.539019	3.63943	0.321129
LYZ	0.0173125	-1.09419	-0.641002
LZIC	0.313815	2.51415	-0.0510938
LZTFL1	-0.103455	1.60769	-0.290096
M6PR	0.420369	-0.0187966	0.201363
MACC1	0.115477	2.7134	0.693168
MACF1	-0.0274166	-1.02455	-0.443605
MAGED2	0.27538	2.09962	0.517256
MAGI3	0.220681	-0.214558	-0.575229
MAGOH	0.193611	1.11377	0.276605
MAGT1	0.287564	0.692193	0.249626
MAN2A1	0.615691	2.217	0.310698
MAN2B1	0.516734	2.03009	0.197309
MAN2C1	-0.403683	1.46762	-1.04542
MANBA	-0.691608	2.79264	0.189286
MANF	0.218299	1.84818	1.00981
MAOA	0.391364	-0.957492	-0.392029
MAOB	0.0509805	-1.65579	-0.900353
MAP1S	0.196059	1.6288	-0.0533439
MAP2	-0.000961797	0.388921	-0.574901
MAP2K1	0.148754	2.29664	0.0509406
MAP2K2	-0.138146	2.74073	0.0819868
MAP2K3	0.171401	2.51911	-0.0560516
MAP2K4	0.39878	2.13722	-0.0189969
MAP2K6	-0.0957499	0.29321	-0.257622
MAP3K2	0.0846624	0.705605	0.29439
MAP4	0.0962153	0.591884	-0.253242
MAPK1	0.196059	0.715637	-0.231236
MAPK13	0.505235	3.3928	0.48633
MAPK14	0.39682	3.15063	0.0461341
MAPK3	-0.116903	0.245182	-0.485406
MAPK9	0.193611	1.25843	-0.190735
MAPKAPK2	0.584562	2.31836	0.26613
MAPKAPK3	0.641909	1.83022	0.105714
MAPRE1	0.197926	1.54945	0.0688577
MAPRE2	-0.0509975	1.1449	-0.265153
MAPRE3	-0.046659	1.22207	-0.269008
MARC2	0.419387	-0.8505	-0.556796
MARCKS	-0.20766	0.451135	-0.0282125
MARCKSL1	0.0168344	0.961582	0.99617
MARS	0.401299	1.37047	0.3766
MAT2A	0.36257	2.08874	0.195889
MATN2	-0.610053	-2.45754	-0.455019
MATR3	0.317709	0.782968	0.275931
MAVS	0.0957499	0.452937	0.164584
MB	-0.635631	-0.437194	-1.39185
MBD1	-0.0375122	-0.193734	0.0665645
MBD2	0.286155	0.530061	0.12375
MBNL1	0.565952	0.808115	0.139306
MBOAT7	0.498297	0.342899	0.189411
MCAM	-0.142003	-2.56227	-0.914799
MCCC1	0.595992	0.374962	-0.0324184
MCCC2	0.0192362	0.663549	0.169033
MCEMP1	-0.362143	0.594353	-0.891664
MCM3	0.357686	4.65102	0.959045
MCM4	0.589974	4.32335	0.951918
MCM6	0.649379	5.34869	0.97304
MCMBP	0.226486	1.36735	0.0745178
MCTS1	0.127039	2.37508	0.436931
MCU	0.297281	0.371893	0.436065
MDH1	0.137182	1.98115	-0.208047
MDH2	0.743124	0.996424	0.377371
ME1	0.167995	2.40823	-0.0375192
ME2	0.32063	1.02216	0.225543
MEAF6	0.39192	0.175085	-0.0834007
MECP2	0.255984	-0.688304	-0.407393
METAP1	0.566951	2.31783	0.53537
METAP2	0.574352	1.83123	0.164309
METTL3	0.605028	2.65821	0.0803197
METTL7A	0.265239	-1.08816	-0.784478
MFAP2	0.269649	0.00132705	0.449648
MFAP4	-0.409569	-0.653387	-0.957223
MFAP5	0.360616	-1.5495	-0.336181
MFGE8	-0.260918	-1.00161	-0.597216
MGLL	0.292421	0.435847	-0.424387
MGMT	0.0504911	1.16591	-0.0168706
MGP	-0.516559	-1.05765	-0.507425
MGST1	0.790947	1.62416	0.178603
MGST3	0.778151	-0.253236	-0.140246
MIA2	0.445527	0.964784	0.398527
MIA3	0.222616	0.667351	0.562727
MICAL1	-0.0577155	0.184598	-0.252618
MICU1	-0.0692627	0.692218	0.426067
MIEN1	-0.0192362	1.36068	0.224757
MIF	0.568353	2.31203	0.182293
MKRN2	-0.400741	0.299872	-0.0576112
MLEC	0.574951	0.794828	0.723266
MLLT1	0.638659	0.332653	0.125051
MLPH	0.128967	2.72913	0.312735
MMAA	0.325499	0.865979	0.143101
MMAB	-0.50168	0.123929	-0.228539
MME	-0.464262	-4.02951	-1.20932
MMP2	0.250253	0.669807	-0.0331282
MMP9	-0.356281	-2.06517	-0.821091
MMRN2	-0.192645	-3.32493	-1.25119
MMS19	-0.0365502	2.46445	0.0847494
MNDA	-0.226932	-0.355718	-0.18833
MOB4	0.271059	0.821945	0.102417
MOGS	0.0793815	0.295128	0.131405
MOXD1	-0.368434	0.285591	0.115567
MPDU1	0.0846624	0.27301	0.127314
MPO	-0.487818	-1.38444	-0.170749
MPP1	-0.418404	-1.63421	-0.710634
MPRIP	-0.0851295	-0.729114	-0.51162
MPST	0.280766	1.19462	-0.278279
MPV17	0.793676	0.279346	-0.265199
MPZL2	0.528074	1.47315	0.239609
MRC1	0.315328	-0.97796	-0.698809
MRI1	0.168506	2.69851	0.038899
MRPL1	-0.0240455	1.3081	0.705858
MRPL11	-0.294365	1.23857	0.460242
MRPL12	0.645952	1.21062	0.650923
MRPL15	0.143426	1.66223	0.648256
MRPL16	0.217779	1.16318	0.437032
MRPL17	0.376257	1.54857	0.45121
MRPL19	0.962292	1.61901	0.55904
MRPL27	0.45777	-0.0964246	0.630017
MRPL33	-0.195544	1.26809	0.636114
MRPL37	0.338599	1.43353	0.32136
MRPL39	1.04971	1.50776	0.471574
MRPL4	-0.0168288	1.19487	0.287822
MRPL40	0.635236	0.964508	0.560526
MRPL42	0.109698	1.30794	0.174592
MRPL44	0.14292	1.31965	0.635689
MRPL47	0.353232	1.79352	0.745984
MRPL48	0.246377	1.11876	0.570922
MRPL50	0.500279	0.585232	0.138878
MRPL53	1.26188	1.77659	0.87667
MRPL54	0.134749	0.53841	0.4292
MRPS15	0.466651	1.06721	0.614899
MRPS16	0.39682	0.994532	0.512836
MRPS18B	0.168051	1.38625	0.688405
MRPS22	0.274502	0.945935	0.528454
MRPS23	0.402702	1.50504	0.468866
MRPS27	-0.129427	1.34963	0.461329
MRPS5	0.356709	1.24106	0.592673
MRPS6	0.673073	1.56015	0.443775
MRPS9	-0.0865877	1.56672	0.508418
MRRF	0.614474	1.27502	0.33542
MRTO4	0.458757	0.613085	0.656135
MSI2	0.575549	1.3156	0.765401
MSLN	0.0683003	3.01002	-0.26642
MSN	0.304522	0.0613506	-0.33787
MSR1	-0.368434	-0.0640414	-0.470673
MSRA	0.197476	0.327815	-0.284397
MT1X	1.53285	2.703	0.934555
MTA1	0.152612	0.272408	0.277899
MTA2	0.40326	0.547115	0.276227
MTAP	0.054829	1.93436	-0.15986
MTCH1	-0.0928299	-0.00975822	-0.202532
MTCH2	0.199409	0.731138	0.459296
MTDH	0.405644	0.584272	0.332728
MTHFD1	0.331345	2.57644	0.258824
MTHFR	0.291985	-0.051422	0.0933165
MTMR1	0.558366	0.747098	0.035008
MTOR	0.194577	0.83877	-0.0633193
MTPN	0.222616	1.72034	-0.126447
MTX2	0.224997	0.140243	-0.0032178
MTX3	0.338599	0.457224	-0.140414
MUC1	1.10039	1.50296	0.546862
MVP	0.660514	0.977243	0.292273
MX1	0.159821	3.21364	0.430525
MX2	0.181568	2.4472	0.859621
MXRA7	0.157892	-1.38728	-0.270159
MYADM	-0.277853	-1.53995	-0.460256
MYBBP1A	0.353232	2.13082	0.566737
MYCBP	-0.0538669	1.26287	0.265943
MYDGF	0.3347	1.288	0.644507
MYH10	0.0625266	-1.48472	-0.862977
MYH11	-0.169471	-1.46781	-1.11754
MYH14	-0.0577155	-1.28298	-0.687699
MYL6	0.00336573	-0.241543	-0.395032
MYL6B	0.474552	-0.441343	-0.159544
MYL9	-0.128967	-0.994152	-0.698458
MYLK	-0.114514	-0.887172	-0.851083
MYO18A	-0.0336644	0.211585	0.154204
MYO1B	0.068793	-1.51705	-0.647824
MYO1C	-0.33665	-2.58633	-1.29745
MYO1D	0.0683003	-0.468552	-0.251048
MYO1F	-0.75173	-0.273056	-0.157356
MYO5A	0.185946	0.871114	0.037568
MYO5B	-0.0981411	-0.431551	-0.197403
MYO5C	0.412092	-0.214848	-0.304581
MYO6	0.352375	0.899481	0.548462
MYOF	0.323984	0.0674781	0.0821874
MZB1	0.107771	3.70184	0.637575
MZT2B	-0.404241	-0.0271427	-0.147576
NAA15	0.438067	1.70794	0.470034
NACA	0.378767	1.89747	0.260111
NADK2	-0.19651	0.80945	-0.00258868
NAE1	0.217259	2.548	0.043556
NAGA	-0.0519426	1.54463	-0.0391001
NAMPT	0.146318	4.13386	0.79
NANS	0.679791	3.32682	0.370234
NAP1L1	0.14779	1.31015	0.18853
NAP1L4	-0.117404	1.36404	0.0495003
NAPA	0.0389486	0.148469	-0.327508
NAPG	0.458186	0.207592	0.0768366
NAPRT	-0.085625	1.06795	-0.298691
NAPSA	1.16108	1.7051	-0.0373538
NASP	0.536622	3.51433	0.832384
NAT10	0.0201981	1.70835	0.497215
NBAS	0.194577	0.483043	0.0633632
NBEAL1	0.165156	1.64018	-0.155159
NCALD	-0.326473	-0.629182	-0.825689
NCBP1	0.171401	1.62417	0.36917
NCBP2	0.513172	0.683933	0.533837
NCEH1	0.0899421	0.317812	-0.308265
NCF2	-0.0606021	1.58734	-0.316006
NCK1	-0.000961797	1.26803	-0.169555
NCKAP1	0.137641	-0.370143	-0.256017
NCKAP1L	-0.0495457	1.42596	0.108143
NCL	0.55656	1.3796	0.570302
NCLN	0.157892	0.566262	0.0751494
NCOA5	0.199859	0.827569	0.268396
NCOR2	0.222169	-0.682945	0.338128
NCSTN	0.307977	0.276831	0.227697
NDRG1	0.206623	2.10857	0.11541
NDRG2	-0.214877	-0.271245	-0.784601
NDUFA10	0.351398	0.272883	0.194144
NDUFA11	-0.0933268	0.442108	0.112058
NDUFA13	0.230358	0.20007	0.186809
NDUFA2	0.482047	0.025623	0.0892044
NDUFA4	0.531464	-0.0692516	0.125317
NDUFA5	0.626159	0.519595	0.169213
NDUFA6	0.335244	0.522381	0.168005
NDUFA7	-0.295773	0.126246	0.187849
NDUFA8	0.515741	0.501982	0.407447
NDUFA9	0.525091	0.0971458	0.0220548
NDUFAB1	0.592379	0.519938	0.147737
NDUFAF2	0.122221	1.36479	0.521963
NDUFB1	0.428795	0.247244	0.0966295
NDUFB10	0.313276	0.521005	0.282636
NDUFB3	0.237579	0.315097	0.418241
NDUFB4	-0.370816	0.292868	0.328348
NDUFB6	0.375279	0.539934	0.38328
NDUFB7	0.099104	0.627733	0.385178
NDUFB8	0.384086	0.271418	0.154497
NDUFC1	0.0221218	0.855236	0.334251
NDUFC2	0.606431	0.402913	0.40389
NDUFS1	0.343045	0.204644	0.188146
NDUFS2	0.171912	0.453606	0.1084
NDUFS3	-0.00721229	0.407788	0.0353629
NDUFS4	0.36703	0.412528	0.321829
NDUFS5	0.427812	0.375898	0.243683
NDUFS6	0.39682	0.290855	0.214587
NDUFS7	0.382682	0.461081	0.249182
NDUFV1	0.0177905	0.33085	0.14143
NDUFV2	0.123646	0.209746	0.116194
NEBL	-0.220681	-2.03079	-1.27267
NECAP2	0.173785	1.09589	-0.122264
NEDD4L	0.0336644	-0.763049	-0.157455
NEDD8	0.46073	1.4776	0.287951
NEGR1	-0.188781	-1.83836	-1.0709
NEK7	0.179637	0.167524	-0.447353
NEK9	0.170947	1.54183	0.0713051
NELFB	0.206175	2.2456	0.339462
NELFCD	0.494914	2.18598	0.17012
NELFE	0.226486	0.589765	0.30119
NEMF	0.103455	2.5155	0.23628
NENF	0.449884	0.926884	0.850128
NES	-0.290478	-1.64167	-0.925171
NEXN	-0.182986	-1.25515	-0.786959
NF2	-0.194577	0.0581987	-0.183226
NFATC2	-0.0360632	0.517123	0.0600537
NFIA	0.429778	-1.31641	-0.671309
NFIX	0.424299	-0.89034	-0.604137
NFKB1	0.281204	0.581977	-0.0742581
NFU1	0.26039	1.04914	0.405034
NFXL1	0.904725	0.178164	0.483126
NGDN	-0.35378	1.80515	0.545207
NHLRC2	-0.370816	1.06978	-0.387022
NHP2	0.51615	1.51231	0.436136
NID1	-0.207141	-2.5859	-0.923651
NID2	-0.106808	-1.79317	-0.592488
NIF3L1	0.0899421	2.01405	-0.0896901
NIPSNAP1	0.368007	1.39923	0.181763
NIPSNAP3A	0.32063	-0.254556	-0.680437
NIT2	0.345972	2.01825	0.0285778
NLN	0.448899	3.46633	0.802796
NLRX1	0.067338	-0.355695	-0.241513
NME1	0.437501	2.47374	0.308435
NME2	0.416861	1.79987	0.627264
NME3	0.415879	0.335775	0.130146
NMT1	0.331345	2.09429	0.28616
NNMT	0.27159	4.54226	0.916153
NNT	0.626159	0.503652	0.417897
NOL3	0.162261	2.60224	0.279651
NOLC1	0.55896	1.4108	0.806137
NOMO1	0.359639	0.0882074	-0.203943
NONO	0.446929	0.429518	0.25581
NOP2	0.737992	2.01124	0.793923
NOP56	0.118367	0.995284	0.353931
NOP58	0.224105	0.964759	0.462963
NOSTRIN	-0.180602	-1.90819	-1.44365
NOVA2	-0.358662	-0.86446	-0.618831
NPC1	0.239595	1.11093	-0.0540188
NPC2	0.896257	1.87976	0.0576158
NPEPL1	0.0129822	1.08029	-0.1621
NPEPPS	0.0928609	2.39351	0.209019
NPLOC4	0.174297	2.06409	0.3362
NPM1	0.718528	1.59677	0.254148
NPNT	-0.067338	-2.77451	-0.73358
NPTN	0.214429	-0.964882	-0.133134
NQO1	0.760993	5.09994	0.519819
NQO2	0.0586777	2.04186	-0.238334
NRBP1	-0.675728	1.29787	0.0988135
NRF1	-0.260831	-0.531868	-0.011994
NRM	-0.00577079	-1.28977	-0.353278
NSDHL	0.230358	1.02803	0.21018
NSF	0.442989	1.47738	0.363499
NSFL1C	-0.0149055	1.00061	-0.103593
NSL1	-0.111624	1.18312	0.0416068
NSUN2	-0.0557912	3.32901	0.764142
NSUN4	0.271499	1.95423	0.31819
NT5C3A	0.505235	3.00895	0.522572
NT5DC1	0.102457	2.74171	0.100724
NT5DC2	0.705248	1.8902	0.436013
NT5E	0.296309	-1.21987	-0.18419
NUBP1	1.62598	2.54838	0.18374
NUBP2	0.791603	2.102	0.156067
NUBPL	0.0408859	1.09328	0.119655
NUCB1	0.256512	0.358819	0.354885
NUCB2	0.27203	1.3589	0.918444
NUCKS1	1.10851	2.41412	0.650854
NUDC	0.276882	2.47044	0.529172
NUDCD1	0.506637	3.47298	0.311194
NUDCD2	0.44102	1.62116	-0.015914
NUDT16	0.078887	1.32779	-0.262863
NUDT2	-0.544996	1.76148	-0.0624583
NUDT21	0.508211	0.993997	0.169046
NUDT3	0.109698	1.52451	-0.226191
NUDT5	0.0817473	2.23497	0.122117
NUMA1	0.257039	0.191839	0.0638829
NUMB	0.498297	-0.0272764	-0.162558
NUMBL	0.0495457	0.0267629	-0.142595
NUP107	-0.0327025	1.16368	0.204258
NUP133	0.178158	0.7803	0.0896343
NUP155	-0.672291	0.690062	0.213231
NUP205	0.0490564	0.27174	0.256713
NUP210	0.407185	0.833882	0.41397
NUP35	0.618499	0.34878	0.149491
NUP54	0.639274	0.659695	0.25075
NUP85	0.11305	1.02216	0.108684
[truncated: 1,417 more rows]

## Sheet: Supplementary Table 5C
phosphosites	Our data	Xu et al, 2020	CPTAC
A2RRP1:1937	0.0846524	-0.0738047	0.354834
A6NDB9:151	-0.164627	-0.0424877	-0.0579455
A6NFI3:112	0.139802	0.10026	0.459413
A7E2V4:48	0.11049	-0.357706	-0.163292
O00161:161	-0.127691	-0.020236	0.267337
O00178:25	-0.236607	-0.293545	-0.0686634
O00193:17	0.125671	0.57025	0.199017
O00264:57	-0.0253524	0.37294	0.0975729
O00267:666	-0.0284149	-0.24339	0.0876434
O00273:315	0.226214	-0.144712	0.46333
O00470:196	-0.417899	-0.0224115	-0.847117
O00505:56	-0.0107788	0.0549394	-0.123042
O00505:60	-0.41305	0.0933833	-0.170859
O00512:687	0.113532	-0.482139	-0.46551
O00515:177	0.806275	-0.223874	1.87765
O00515:19	1.00233	-0.126968	1.04484
O00629:60	-0.1526	0.200358	-0.211485
O14495:297	-0.409338	-0.21282	-0.513651
O14558:16	-0.167454	-0.251038	-1.8459
O14617:658	0.538127	0.188221	0.431837
O14683:14	0.303498	0.929983	0.707266
O14686:1671	0.0892893	-0.16025	0.540492
O14686:4738	0.0778855	-0.0798074	0.308395
O14745:280	-0.0190686	-0.0242298	-1.08051
O14791:311	-0.468666	-0.0812497	-1.26936
O14791:314	-0.499455	-0.0660599	-0.903669
O14828:32	-0.000662797	0.0324141	0.455851
O14974:871	-0.240479	-0.0639178	-0.247356
O15014:576	-0.0504887	-0.025282	0.359109
O15027:1069	0.218761	0.212385	0.700902
O15027:1964	0.0613837	0.123634	-0.0790872
O15042:67	0.101244	0.119567	1.38128
O15061:1044	-0.160214	-0.187467	-1.28535
O15211:409	0.0956712	0.131544	-0.966221
O15417:1127	0.158656	-0.291991	-0.155429
O15438:908	0.275465	0.450971	1.11973
O15541:253	-0.185416	-0.204384	0.166246
O15551:209	0.0768153	-0.0500775	1.75783
O43150:701	-0.0358831	-0.0736943	-0.664718
O43236:325	-0.272599	-0.157119	-1.25408
O43290:448	0.00954397	0.433993	0.649081
O43294:137	-0.768882	-0.375147	-1.01249
O43294:403	-0.300898	-0.233521	-0.461274
O43294:68	-0.381336	-0.0365733	-1.39488
O43306:54	-0.281621	-0.158463	-0.0640729
O43314:38	0.0827824	-0.156625	0.126048
O43318:439	-0.0829883	0.0888124	-0.0542755
O43395:619	0.281984	0.51062	0.998317
O43399:166	0.459948	0.27635	0.376847
O43719:624	0.400981	0.51668	1.11517
O43719:642	0.473516	0.601653	0.519767
O43765:77	-0.306049	-0.134672	0.183046
O43765:81	-0.195008	-0.0698579	0.4688
O43815:245	-0.482456	-0.202369	-0.550711
O60264:66	-0.102915	0.0660931	0.241728
O60271:217	0.0391464	-0.18599	-0.213005
O60437:1657	-0.0374134	-0.24605	-0.929847
O60437:887	-0.356066	-0.0320649	-1.35725
O60486:978	-0.154826	-0.0235744	0.155698
O60502:364	-0.287733	0.0613571	0.283187
O60504:348	-0.171917	0.0683308	-1.67451
O60716:346	0.271662	0.220803	-0.0684735
O60749:119	0.536723	0.101661	0.687409
O60784:355	-0.0189999	-0.0559082	-0.459055
O60825:466	0.0424132	0.264319	0.327474
O60832:485	-0.249188	0.101667	0.134193
O60832:494	0.240836	0.633936	0.786738
O60841:107	0.216287	0.285442	0.433846
O60841:113	0.197689	0.360947	0.973885
O60841:164	0.0216266	-0.0282045	0.683061
O60841:214	0.096533	0.648623	0.294929
O75113:300	-0.19022	-0.0531983	-0.238644
O75151:882	-0.294258	-0.0622794	-0.622246
O75151:899	-0.00125273	0.0342915	0.601035
O75152:108	-0.0923181	-0.175062	0.600418
O75190:277	-0.0887821	-0.0640254	-0.450057
O75351:102	-0.0932205	0.326138	-0.00638758
O75379:30	-0.150854	0.188119	0.284526
O75382:7	-0.0178791	0.0255807	-0.35314
O75396:137	0.249907	0.419432	0.102075
O75396:168	0.44123	0.227925	0.980451
O75475:129	-0.0236733	-0.0269816	-0.487204
O75494:133	0.112202	0.401612	0.564283
O75533:223	-0.0294909	-0.15015	0.186196
O75569:18	0.448768	0.71614	0.441041
O75643:225	0.0681745	0.540101	0.629472
O75676:347	-0.0112862	-0.0372871	-0.0166334
O75764:115	0.310028	-0.159282	0.451112
O75791:262	0.132812	-0.0472998	-0.344129
O75909:324	0.0866023	-0.0262692	-0.324619
O75909:340	0.114083	0.0183213	-0.295195
O94804:438	-0.411982	-0.103011	-0.783443
O94811:32	-0.400717	0.0153564	-1.10557
O94819:107	-0.273739	0.0938462	-0.374297
O94826:91	0.00821023	0.441367	0.555745
O94874:458	0.0391953	0.142811	0.38468
O94880:835	0.264201	0.0223895	0.433683
O94979:799	0.235135	1.24346	0.811791
O95049:112	0.454739	0.287342	0.250274
O95049:203	0.0215564	-0.0434613	-0.16887
O95049:319	0.474981	0.0565264	0.38698
O95171:68	0.0815906	-0.0173565	-0.772653
O95218:120	0.0625802	0.336056	0.149774
O95218:153	0.376678	0.306135	0.261524
O95292:156	0.206673	0.0918756	0.422734
O95365:337	0.0100141	0.0896497	0.168243
O95425:221	-0.226985	-0.0213235	-0.432194
O95425:270	-0.120634	-0.0852245	-1.7154
O95425:707	0.356215	-0.0608445	-0.214013
O95466:1031	-0.0737128	0.186438	-0.473954
O95466:184	0.0306846	-0.137333	-0.213473
O95466:624	0.0654367	0.662631	-0.0240855
O95562:9	0.200417	0.0109127	0.822666
O95684:156	0.0777456	0.367631	0.094729
O95810:203	-0.645868	-1.68916	-2.28027
O95810:204	-0.632509	-1.69082	-2.55166
O95810:218	-0.564272	-1.22885	-2.23947
O95810:287	-0.57604	0.287578	-2.77934
O95810:293	-0.68946	-0.514759	-2.50209
O95817:377	-0.257214	0.0190259	0.109013
P00558:203	0.0207464	0.10818	1.18702
P01008:68	-1.04454	-0.0634377	-1.64695
P01042:332	-1.04203	0.234496	-1.01742
P01833:682	0.648414	0.406667	1.257
P02545:390	0.208484	-0.128904	-0.325087
P02545:533	-0.128495	-0.0981704	-0.563578
P02545:632	-0.246657	-0.163705	-0.908647
P02545:636	0.0209918	-0.0290928	-0.09798
P02549:1284	-0.754616	-0.475621	-1.91758
P04075:36	-0.188652	0.0748655	-0.251373
P04406:210	-0.299873	-0.173493	0.269423
P04792:15	0.417039	0.574799	-1.4214
P05114:89	0.148974	0.515373	0.557946
P05186:110	0.472037	-0.119864	0.26023
P05455:366	-0.0467295	0.135924	0.408278
P05783:398	0.340677	0.112995	0.487529
P06241:21	0.141566	-0.00893529	-0.197487
P07910:233	0.228358	0.707982	0.419001
P07948:11	-0.0927931	-0.141681	0.247592
P07948:13	-0.147876	-0.127858	0.146845
P08575:975	-0.163171	0.340135	0.0467318
P08621:226	0.22951	0.463768	0.742875
P08621:320	0.082121	-0.185441	0.671282
P08651:339	0.00317183	-0.103707	-1.1954
P08670:214	-0.037436	0.0309019	-0.837223
P08670:325	-0.371615	-0.31719	-1.25722
P08670:430	0.00220329	0.673896	-0.581438
P09651:6	0.165433	1.26897	0.301593
P10644:83	-0.117639	0.425524	-0.248446
P11171:542	-0.500344	-0.341139	-1.51828
P11274:122	0.163402	-0.0132595	1.1618
P11388:1106	0.800702	0.65712	2.16021
P11831:224	-0.0720834	-0.142122	-0.134388
P12270:379	-0.0146567	-0.0280413	0.284385
P12931:17	0.100879	0.259879	-0.218608
P13224:191	-0.569529	-0.606566	-2.29501
P13498:147	0.68136	0.0197486	0.19518
P13796:257	-0.11142	0.502706	-0.389964
P13796:5	-0.283848	0.423228	-0.544513
P13797:339	-0.139554	-0.128759	0.504414
P13861:58	-0.00768893	0.0704964	-0.324799
P14317:275	-0.0845247	0.0830363	0.186351
P14618:37	0.121968	0.0133235	0.903428
P15924:22	0.618414	0.661911	1.65524
P15924:2207	0.560512	0.369298	1.29218
P15924:2209	0.629053	0.535882	1.55425
P16070:706	-0.0158015	-0.675192	-1.14379
P16150:355	-0.0645844	-0.116503	-1.13997
P16157:1378	-0.818269	0.0682017	-1.24872
P16157:1666	-0.181331	-0.251441	-1.28957
P16157:1686	-0.582528	-0.596926	-1.72074
P16157:781	-1.45493	-0.21237	-1.96143
P16157:834	-0.720824	-0.938306	-1.58265
P16949:16	-0.364129	-0.442151	-0.577911
P16949:25	0.276738	-0.261238	-0.331925
P16949:38	-0.274789	0.134907	-0.0715048
P17026:49	-0.131097	-0.181656	-0.621807
P17029:13	0.0632228	-0.176878	0.119831
P17096:36	0.100386	0.209718	0.583975
P17252:226	-0.363073	-0.185496	-0.770195
P17661:28	-0.368961	-0.503773	-1.7759
P18206:272	0.00372176	-0.0184848	-1.50337
P18206:290	-0.221496	-0.402116	-0.626822
P18206:721	-0.214968	-0.131749	-0.972926
P18206:809	-0.147604	-0.0859596	-0.859626
P18206:822	-0.0402799	0.222716	-0.8855
P18433:798	-0.461193	-0.118321	-1.46326
P18615:115	0.0976311	0.146174	0.391827
P18754:11	0.585294	0.832982	0.767056
P18858:141	-0.0893857	-0.328632	0.503389
P18887:447	0.26897	0.700575	0.956714
P18887:453	0.26897	0.562648	1.0537
P19634:703	0.0765633	-0.0624182	-0.383764
P19634:796	-0.0382818	-0.177651	-0.0867071
P19823:60	-1.00848	-0.0823125	-0.810612
P20020:1155	-0.288825	-0.0857751	-0.34185
P20700:575	-0.460281	0.111345	0.474816
P20749:374	0.312455	0.129048	1.05306
P21127:47	0.00743809	0.0892061	0.164139
P21333:1734	-0.262305	-0.259402	-0.441403
P21333:2152	-0.154235	-0.00347258	-0.814049
P21333:2180	-0.562496	-0.696882	-1.33091
P21333:968	-0.225816	-0.0118547	-1.40692
P21730:327	-0.0245347	0.0260931	-1.11051
P21796:104	0.120518	0.137458	0.826339
P21860:686	0.0226378	-0.0812191	0.331149
P22059:351	-0.19794	0.492848	0.474371
P22626:212	0.379125	-0.0962889	-0.995384
P23193:100	0.122959	0.738583	0.586432
P23327:431	0.0764053	-0.0860551	-0.351179
P23327:567	0.0628697	-0.154716	-0.528024
P23396:221	0.313778	1.22894	0.672914
P23497:157	0.105862	-0.048757	-0.010362
P23497:171	-0.137941	-0.079827	-1.02785
P23528:24	-0.0632509	-0.0125432	0.535047
P23588:504	-0.0340036	0.245677	0.65656
P24534:106	0.0857966	0.880642	0.588235
P25440:298	-0.00187261	-0.335325	0.548483
P25440:301	-0.00187261	-0.351509	0.555825
P25490:247	-0.232922	0.0809309	0.217063
P26038:407	-0.227753	-0.122667	-1.36766
P26368:79	0.265673	0.544031	0.367562
P27361:204	-0.151866	-0.111758	-1.15175
P27816:1073	-0.0503344	0.0981243	0.189363
P27816:521	-0.388585	0.522075	-0.407122
P27816:636	-0.222492	-0.0633306	-0.521107
P27824:554	0.279567	0.42472	0.27324
P27824:562	0.269429	0.874139	0.077557
P27824:564	0.180106	0.0910092	0.0765986
P27824:583	0.0760717	0.375494	0.392755
P28290:641	0.419396	0.215166	0.481453
P28290:737	0.168624	0.0699739	-0.390979
P28482:187	0.023558	-0.260343	-0.833665
P29401:295	-0.323145	-0.0360168	0.27884
P29536:119	-0.277046	-0.822244	-1.56838
P29590:403	0.0797717	0.227455	0.201206
P29590:480	0.37563	-0.2006	0.571444
P29590:493	0.446341	-0.146014	0.661719
P29590:518	-0.079907	0.278092	-0.0324307
P29590:527	-0.0935272	0.286354	0.0886032
P29966:101	-0.707137	-0.480726	-0.997718
P29966:145	-0.365561	0.0622932	-0.0343739
P29972:262	0.235251	-0.509519	-2.04217
P30419:47	0.140028	0.294922	0.827979
P31751:451	-0.132274	0.273853	-0.191629
P33241:111	-0.0137764	0.761837	-0.0410658
P33241:130	-0.0775599	0.0884253	-0.0802201
P33241:193	-0.437562	1.13249	-0.533336
P33241:24	0.0673323	-0.0535472	-0.351371
P33241:252	0.016206	0.882979	-0.122718
P35221:641	-0.0756584	-0.0575298	-0.0992473
P35222:191	0.0867103	-0.457451	-0.793654
P35579:1114	-0.211904	-0.0716403	-0.371651
P35579:1943	-0.130602	0.16214	-0.0307308
P35611:358	-0.531041	-0.774969	-1.45745
P35659:32	0.288688	1.13909	0.392174
P35749:1954	-0.10411	-0.780335	-0.673384
P35749:8	-0.478782	-0.642074	-1.5298
P36507:394	-0.278603	0.747744	-0.26913
P36915:51	0.225884	0.215052	0.27772
P37802:163	0.446826	1.28738	1.01101
P40763:727	-0.255598	-0.08029	-0.0407304
P41208:20	0.0216548	-0.039644	-0.272313
P41279:141	-0.216679	-0.101969	-0.562307
P42224:727	-0.205898	0.122755	0.142867
P42566:790	-0.0687854	-0.108259	-0.420641
P42566:796	-0.0700132	-0.0165823	-0.218262
P42677:11	-0.143382	-0.221304	0.608338
P42696:14	0.288084	-0.00541074	0.563172
P43243:596	0.281886	0.43168	0.220371
P43307:268	-0.0905977	-0.00457506	0.89961
P45974:623	-0.293489	-0.349279	-0.325551
P46019:729	0.205453	0.097696	0.606526
P46100:1348	-0.0286637	0.0851043	1.10429
P46100:1352	-0.0523624	0.0632138	1.30088
P46821:1265	-0.232106	0.141252	-0.585322
P46821:1427	0.122109	-0.243961	-0.173284
P46821:1779	0.0271112	0.174245	0.741335
P46821:561	0.00277548	0.0875178	-1.05314
P46937:61	0.150331	0.13299	-0.25088
P46940:1443	0.0542453	-0.33956	-0.21077
P46940:330	0.0698933	0.0342776	0.519099
P47712:437	0.356898	1.04952	1.41412
P48634:1219	-0.173573	0.0294443	0.882646
P48634:350	0.0729781	0.30931	0.846015
P48634:761	0.0446094	0.0944383	0.596931
P48681:1496	-0.222354	-0.108549	-0.0549464
P48681:471	-0.263279	-0.238124	-0.894432
P48681:680	-0.453126	-0.138507	-1.23481
P48681:768	-0.397356	-0.368624	-1.25605
P48681:891	0.171066	-0.394562	-1.15245
P49006:104	0.58233	0.201587	0.439023
P49023:272	-0.204552	-0.231894	-1.69752
P49736:139	0.39187	0.966329	1.65543
P49750:756	0.117792	-0.215777	1.05285
P49756:583	0.41988	0.0506704	0.360709
P49757:438	0.0426109	-0.0741761	-0.872102
P49790:192	0.503751	0.439054	1.19817
P49790:334	-0.258787	-0.0739465	0.414366
P49792:1509	0.162867	-0.0371481	0.187441
P49792:2900	0.0187984	0.45828	0.670856
P50479:112	0.00559415	1.34423	0.518434
P50552:239	-0.0719052	0.073005	-1.01224
P50747:79	0.460602	-0.193935	0.302744
P51149:72	-0.0147097	-0.0742245	-0.416657
P51532:1417	0.381936	0.0761188	0.564885
P51572:216	0.315213	0.107712	0.892904
P51610:1507	-0.183937	0.120894	-0.0328771
P51636:20	-0.757163	-1.30406	-1.99731
P51812:415	0.404447	0.0744656	-0.0218492
P51812:715	0.105154	-0.0262072	0.647884
P51858:107	0.306191	-0.111413	0.734357
P51858:165	0.534551	1.55433	0.261852
P52756:624	-0.0735442	0.0627182	0.233317
P53396:455	-0.0883503	0.195622	0.13851
P53396:481	-0.106508	0.0350915	0.112463
P54105:102	-0.29905	1.37372	0.533923
P55081:116	-0.0858821	0.362523	0.381344
P56524:565	-0.0672306	-0.143176	0.0380013
P56856:247	-0.268794	0.0954114	-2.5209
P57682:250	0.187901	-0.213725	-1.25814
P58340:240	0.139545	0.247166	-1.47136
P62070:186	-0.116848	-0.466302	-0.646758
P62805:48	-0.212698	-0.462825	-0.569644
P63208:131	0.37712	0.32751	0.781789
P67809:165	0.179695	0.0215456	0.735802
P67809:176	-0.0463199	0.407907	0.212391
P69905:132	-0.847138	-0.888255	-1.96184
P78346:251	0.188755	-0.059649	0.0494956
P78347:103	0.136629	-0.0879218	-0.052779
P78559:1069	-0.041373	0.128372	0.0526912
P78559:612	-0.114659	-0.0324951	0.468263
P78559:667	-0.0703367	-0.0885469	0.118681
P85037:101	0.15994	0.0378615	0.453828
P85037:213	0.0649797	0.163793	0.462141
P85037:257	-0.215502	-0.149299	0.120102
P85037:420	-0.0150142	0.0908765	0.0720872
P85037:445	0.118099	0.387898	0.511884
P98082:401	-0.511997	-0.122784	-0.652693
P98095:277	-0.0805422	-0.0364248	-0.406139
Q00587:121	0.16506	-0.261044	-0.45961
Q00587:192	-0.0920248	-0.0688198	-0.186024
Q00587:350	-0.111976	-0.117855	-0.0156262
Q00587:353	-0.111976	-0.229518	-0.404762
Q00613:303	0.0217038	0.360241	0.424139
Q01105:7	0.375021	0.291006	0.63721
Q01130:191	0.340718	1.7641	0.876311
Q01433:168	0.19212	0.143393	0.158439
Q02040:537	0.146986	0.139205	0.158959
Q02156:710	0.139313	-0.0636489	-1.83054
Q02818:369	0.254247	0.170813	0.31536
Q02952:1331	-0.626848	-0.179122	-1.23868
Q02952:1587	-0.33607	-0.0491971	-1.78347
Q02952:371	-0.393525	-0.524121	-1.73545
Q02952:612	-0.485385	-0.0937704	-1.69731
Q02952:627	-0.535092	-0.327063	-1.71774
Q03111:475	0.166174	0.358727	0.464884
Q03135:37	-0.67731	-2.6322	-3.34455
Q03252:34	-0.163669	-0.0966894	-0.553968
Q05193:774	0.0243486	0.284343	0.41774
Q05209:603	0.0284986	-0.336753	0.450643
Q05209:673	0.0766488	0.267709	-0.0792547
Q05682:202	-0.563262	-0.216889	-1.96904
Q05D32:9	0.126156	0.129274	-0.136765
Q06587:38	-0.152865	-0.165268	0.0428953
Q07666:20	0.44013	0.235105	-0.111776
Q07866:524	-0.365552	0.0337224	-0.621672
Q07955:199	0.220467	0.405109	0.332771
Q08170:431	0.513436	0.0042949	0.477029
Q08174:962	-0.223807	-0.0263863	-0.456313
Q08174:984	-0.392893	-0.0225454	-1.01782
Q08357:256	0.348463	0.188911	1.10491
Q08495:333	-0.727953	-0.240933	-1.2779
Q08495:372	-0.540162	-0.179325	-1.53703
Q08945:444	-0.129676	0.630721	0.603034
Q09161:7	0.386503	-0.0959949	0.641663
Q09666:1068	0.238202	-0.20248	-0.587812
Q09666:1170	-0.470096	0.0260678	-1.26776
Q09666:1298	-0.560321	0.00214126	-1.52344
Q09666:135	-0.788425	-1.32738	-1.258
Q09666:210	-0.604019	-1.27123	-1.28167
Q09666:216	-0.71983	-1.5552	-2.1658
Q09666:3426	-0.519514	-0.157884	-1.90271
Q09666:3716	0.0831108	-0.0862608	-0.75987
Q09666:4100	0.0357982	0.0148858	-0.897528
Q09666:4486	0.00614706	-0.146136	-0.743672
Q09666:4766	-0.148372	-0.0932964	-1.00423
Q09666:4850	-0.0455227	-0.269238	-1.6492
Q09666:4960	-0.595569	-0.196508	-1.24711
Q09666:511	-0.354593	-0.308559	-1.60994
Q09666:5110	-0.800262	-0.824226	-1.46178
Q09666:5125	-0.737374	-0.414968	-1.89855
Q09666:5332	-0.435847	-0.137944	-1.91719
Q09666:5400	-0.0221395	-0.480648	-1.16208
Q09666:5448	-0.454418	-1.01719	-2.10457
Q09666:5739	0.285006	-0.137984	-1.15443
Q09666:5752	-0.448776	-0.442166	-1.80523
Q09666:5763	-0.809638	-0.49937	-1.63092
Q09666:5780	-0.280246	-0.152211	-1.11367
Q09666:5841	-0.510584	-1.08706	-1.22811
Q09666:845	0.301174	-0.0954503	-0.175628
Q09666:93	-0.47214	-0.644662	-1.29133
Q0JRZ9:394	-0.110233	0.00374779	0.0637991
Q0JRZ9:403	-0.102229	0.147656	0.126666
Q0VF96:283	0.110739	-0.181135	-0.668983
Q12774:445	-0.0365018	-0.317148	0.178872
Q12774:450	-0.0365018	-0.253982	0.110021
Q12789:1068	0.0941957	0.229384	0.421019
Q12857:280	-0.0953263	-0.0154398	-0.784083
Q12893:320	0.0831749	0.0412473	0.471554
Q12893:329	0.0460811	-0.212647	0.621201
Q12906:62	-0.00636741	-0.0130735	0.680435
Q13043:320	-0.039847	-0.0597619	0.0439201
Q13103:96	-0.056444	0.110584	-0.447201
Q13177:141	0.00278346	0.210738	-0.633279
Q13185:93	0.276482	0.703124	0.239151
Q13185:95	0.0833142	0.274688	0.173381
Q13242:211	-0.00575924	0.130465	0.322736
Q13247:303	0.140133	0.742495	0.486355
Q13247:314	0.291984	0.24337	1.22835
Q13263:473	0.35007	0.68247	0.636129
Q13283:149	-0.109433	0.79675	0.359375
Q13283:232	0.192868	-0.0791326	0.702549
Q13286:12	-0.111575	0.142105	0.129874
Q13286:14	0.0211932	0.00968628	0.106133
Q13409:95	0.041958	-0.264633	-0.169776
Q13421:200	0.261557	-0.0385318	-0.684427
Q13425:110	-0.174642	-0.31626	-0.834619
Q13425:222	-0.51163	-0.366395	-2.01021
Q13425:95	-0.478282	-0.900907	-1.23864
Q13427:358	0.0528417	0.210702	0.610234
Q13427:397	0.576549	0.336812	0.71664
Q13427:687	0.181777	0.187125	0.349433
Q13428:381	0.684342	0.308817	1.03053
Q13428:906	0.333669	0.0646034	-0.204476
Q13459:1267	-0.228942	0.045571	0.139362
Q13459:1271	-0.15958	-0.0393121	0.0558081
Q13459:1992	-0.292783	-0.103537	0.0937761
Q13501:269	0.214268	0.31584	0.875522
Q13523:142	-0.0895098	-0.191097	0.612516
Q13547:393	0.0660041	0.323627	0.364808
Q13547:421	0.16183	0.149651	1.25432
Q13573:224	0.0751824	0.0679613	0.585221
Q13595:202	-0.34041	0.225619	0.500889
Q13610:50	-0.134456	-0.279442	0.452736
Q13615:633	0.236487	0.0753622	0.260518
Q13813:1031	-0.29313	-0.361285	-0.501999
Q13813:1217	-0.0490406	-0.718679	-0.840933
Q13813:1291	-0.303388	0.0822811	-1.1496
Q13813:1306	-0.0993536	-0.00898865	-0.809787
Q13884:214	-0.193657	-0.0933347	-0.125914
Q13884:219	-0.160479	-0.00185095	-0.51616
Q13884:389	-0.160591	-0.00919775	-0.283544
Q13884:87	-0.148018	-0.893915	-0.643473
Q14103:190	-0.086251	-0.125121	0.393829
Q14103:87	0.869262	0.474387	0.362338
Q14126:680	0.12273	0.436528	0.876941
Q14160:1448	-0.613734	-0.130554	-0.361105
Q14160:1475	-0.0952049	-0.0285635	-0.215613
Q14160:1486	-0.0809046	-0.176243	0.311661
Q14160:504	0.286071	0.0762358	0.1519
Q14160:853	-0.151684	-0.242737	-0.388924
Q14247:401	-0.0516594	1.36438	0.3596
Q14247:405	-0.0782759	0.762286	0.0628852
Q14258:100	-0.309663	0.357701	0.61505
Q14289:375	-0.340239	-0.223087	-0.472777
Q14315:2233	-0.480709	-0.564289	-1.44287
Q14573:1832	0.540286	0.0238803	-0.312063
Q14671:709	0.260416	0.0648218	0.701596
Q14676:168	-0.0429242	-0.0766486	0.0998093
Q14677:227	0.228338	-0.0991521	0.660998
Q14687:909	-0.528108	0.0192536	0.175802
Q14764:445	-0.0967103	0.169055	0.311011
Q14847:146	-0.195072	-0.0932646	-0.427307
Q14938:265	0.195025	-0.0102436	-0.787125
Q14980:169	-0.195499	-0.0567526	-0.445631
Q14980:271	-0.197472	-0.184193	-0.461395
Q15052:640	-0.290242	-0.0992924	-2.00139
Q15052:684	-0.303234	-0.00629979	-0.715315
Q15057:384	-0.252632	-0.39653	-0.716386
Q15057:521	0.103843	0.0887307	-0.0381503
Q15111:556	-0.30067	-0.0027572	-1.01264
Q15124:122	-0.298522	-0.989553	-1.42759
Q15139:205	-0.116758	-0.0265966	-0.204192
Q15149:1435	-0.487587	0.198911	0.491714
Q15149:1732	-0.106579	0.369423	0.340403
Q15149:2039	-0.197728	-0.154577	0.538963
Q15149:4030	0.335766	-0.299474	0.442442
Q15149:4386	-0.173897	-0.0752918	-0.477706
Q15149:720	-0.315547	0.0763586	-0.0341192
Q15233:450	-0.0893845	-0.11411	0.106028
Q15311:62	0.290539	-0.260358	-0.246636
Q15365:173	-0.29422	-0.105654	-0.0736351
Q15365:189	-0.708381	-0.0168736	0.150016
Q15424:604	0.195632	-0.0278914	-0.386433
Q15435:12	-0.0201298	-0.137529	0.419897
Q15435:24	-0.0543275	0.23049	0.450658
Q15435:27	-0.0900857	0.0932426	0.398562
Q15459:329	0.292751	0.39848	0.447218
Q15459:359	0.324172	0.241482	0.587831
Q15477:256	0.341076	0.44768	-0.0403241
Q15599:280	-0.524643	0.0408749	-1.66214
Q15678:314	-0.0822702	-0.0480522	-0.232528
Q15742:162	0.0291795	-0.346043	0.776552
Q15746:1776	-0.168757	-0.0934866	-0.713447
Q15746:1778	-0.222266	-0.0392168	-1.22669
Q15746:305	-0.599985	0.0155487	-0.805071
Q15942:267	-0.404521	-0.156776	-0.89896
Q15942:344	-0.856177	-0.660551	-1.25255
Q16204:240	0.019587	0.338557	0.36452
Q16204:244	-0.00948054	0.531504	0.322094
Q16514:51	0.0190369	-0.0421536	-0.540529
Q16539:182	-0.00726263	0.326678	0.437588
Q16625:313	-0.190512	-0.52427	-0.206629
Q16625:358	-0.329911	0.0864128	-0.0864372
Q16666:153	-0.0453644	0.595278	0.312889
Q16799:487	-0.271422	-0.116396	-0.61816
Q1KMD3:161	0.257315	0.995671	0.337048
Q29RF7:1305	0.114101	0.0362757	0.225371
Q2M1Z3:1178	-0.0456762	-0.152557	-0.651923
Q2M1Z3:629	-0.0804186	-0.119107	-0.54136
Q32MZ4:120	0.00841262	-0.0679929	-0.269223
Q4KMP7:132	-0.135375	0.0372843	0.548257
Q4KMP7:678	-0.173086	0.293688	0.0418634
Q4L180:791	-0.158186	0.0759068	0.312226
Q52LW3:949	-0.093374	0.00315397	-0.939375
Q53QV2:63	-0.217663	-0.0378942	-0.770252
Q5U651:328	-0.134085	0.000248247	-2.01235
Q5UIP0:1688	0.142247	0.381363	0.599905
Q5VUA4:136	0.0174609	-0.122526	0.432745
Q5VUA4:173	-0.167419	0.0659426	0.135462
Q5VUB5:855	-0.304295	0.428665	-1.27349
Q63HN8:1258	-0.177901	0.0411049	0.384751
Q68CZ2:1149	-0.428999	-0.0787194	-1.19867
Q68CZ2:1154	-0.425195	-0.0124777	-0.586535
Q68DQ2:1280	-0.300004	-0.188737	-0.0477097
Q68DQ2:931	-0.389915	-0.104296	-0.314253
Q6IQ22:21	-0.117109	-0.0627335	-0.505162
Q6KC79:318	-0.0808332	-0.111337	0.340908
Q6NZI2:171	-0.455311	-0.522896	-3.07437
Q6NZI2:300	-0.0691458	-0.261711	-1.38191
Q6P1M3:961	-0.506748	-4.30972	-1.59626
Q6P2E9:844	0.131179	-0.231595	0.934188
Q6PCE3:175	-0.0800923	-0.0845872	0.254254
Q6PID6:194	0.134955	-0.0884143	0.175158
Q6PJG2:461	-0.0754184	-0.0906011	-0.217282
Q6PJG2:661	-0.236523	-0.0307918	-0.181166
Q6PJG2:923	0.260738	-0.268079	0.160594
Q6R327:21	-0.203954	-0.165381	0.0460058
Q6ULP2:382	0.202298	0.224424	0.262381
Q6UN15:304	0.287056	0.120331	0.545342
Q6UN15:492	0.0422451	0.25368	0.599373
Q6VMQ6:113	-0.033907	-0.0661397	0.643635
Q6VMQ6:559	0.149919	0.170553	0.788505
Q6WCQ1:289	-0.272064	-0.126288	-0.375186
Q6WCQ1:977	-0.138616	0.016854	-0.536136
Q6WCQ1:993	-0.128969	-0.146587	-0.667588
Q6ZQN7:16	-0.112171	-0.131815	-0.869851
Q6ZRV2:1003	0.337171	-0.00418613	0.467446
Q6ZRV2:870	0.385277	0.43467	1.01495
Q6ZRV2:892	0.158089	0.55663	0.945128
Q76N32:478	0.00514427	-0.0531117	-0.397023
Q7L014:804	0.254848	0.370329	0.18465
Q7LBC6:289	0.0471109	1.05475	0.506467
Q7Z2W4:284	0.204506	0.491414	0.188268
Q7Z309:115	-0.197027	-0.0276664	-0.0883208
Q7Z3K3:425	0.202272	0.054936	0.346641
Q7Z417:629	0.0851453	-0.286126	0.873348
Q7Z417:652	-0.0576863	0.166646	0.741146
Q7Z422:107	0.124991	0.298707	0.165336
Q7Z434:152	-0.118493	-0.218194	0.0769125
Q7Z434:165	-0.0910442	0.0752867	0.0432352
Q7Z434:222	-0.056446	0.0311699	-0.639777
Q7Z4V5:454	0.148216	0.19345	0.134221
Q7Z4V5:625	0.172051	0.180462	0.249518
Q7Z4V5:652	0.184101	0.416869	0.027811
Q7Z5L9:175	0.24295	0.239606	0.576399
Q7Z6I6:630	-0.0113062	0.0715019	-0.382121
Q7Z6Z7:1395	-0.195196	0.164175	0.516717
Q7Z6Z7:1907	-0.109764	0.425493	0.428087
Q86UE4:426	0.0538848	1.28486	0.225904
Q86UU0:116	0.125668	-0.124748	0.41026
Q86UU1:583	-0.168103	-0.201982	-0.423345
Q86VM9:162	0.308028	0.0645547	0.444951
Q86VM9:46	0.108982	0.23498	0.316455
Q86VM9:67	0.0567648	0.581959	0.349064
Q86VR2:320	0.0121114	0.383979	0.394585
Q86WR7:179	0.0764013	-0.438138	-0.196326
Q86XP3:185	-0.120378	0.152164	0.478167
Q8IU81:384	0.168589	0.0726128	0.284339
Q8IVF2:294	0.0911319	-0.0112459	0.813106
Q8IWW6:240	0.123034	0.19646	0.72616
Q8IX01:315	0.437445	-0.00915981	0.212758
Q8IXM2:96	0.0213771	-0.225937	1.4974
Q8IXQ3:76	-0.811349	-0.225666	-1.22693
Q8IXQ4:105	-0.0901891	-0.137308	0.291969
Q8IZP0:183	0.257225	0.0718121	0.047948
Q8IZP0:225	0.251407	0.0530067	0.183445
Q8N1F8:761	0.254199	-0.00886388	0.0887832
Q8N1W1:1538	-0.294222	0.13849	-0.412849
Q8N2F6:45	0.226158	0.140408	1.00773
Q8N2U9:110	0.193666	0.000915001	-0.235973
Q8N3D4:310	-0.23223	0.112491	0.0905868
Q8N3E9:496	-0.559894	-0.251325	-2.00486
Q8N3X1:499	-0.0437489	-0.0705483	0.409253
Q8N4C8:601	0.190519	-0.423747	-0.378703
Q8N5F7:149	0.544611	0.152215	0.730516
Q8N6N3:158	-0.176566	-0.0790968	-0.319128
Q8NBJ4:255	0.413742	0.124357	0.549823
Q8NC44:385	-0.127832	-0.125072	-0.443655
Q8ND56:182	0.0880497	0.23891	0.378168
Q8ND76:326	-0.251307	-0.22722	-0.33921
Q8NDX5:263	0.0907654	0.000948497	-0.126213
Q8NDX5:609	-0.129633	-0.0233743	0.0611562
Q8NE71:105	0.128964	0.111078	1.37803
Q8NE71:109	0.286041	0.568696	0.649311
Q8NE71:228	0.313029	0.795016	0.649604
Q8NFC6:2986	0.014919	-0.0565567	0.52435
Q8NHG8:82	0.111707	0.0321913	0.150027
Q8WUA2:178	-0.197976	0.358552	0.0317776
Q8WWI1:246	-0.123971	-0.157	0.122504
Q8WWQ0:1315	0.0517489	-0.0617576	-0.116369
Q8WWQ0:1783	-0.0918763	-0.0368504	0.282922
Q8WXF7:10	-0.0549388	-0.0973425	-0.104694
Q8WXH0:2781	0.0233055	0.0583378	0.421307
Q8WXI9:129	-0.276612	-0.193692	0.029867
Q8WXX5:109	-0.105775	0.0303007	-0.404825
Q92508:1391	-0.69408	-0.183933	-0.387051
Q92508:1646	-0.42483	-0.264195	-0.724478
Q92522:31	0.117607	0.281335	-0.149943
Q92597:330	0.0854517	0.988707	0.248109
Q92608:1685	-0.380048	0.00410809	-0.401764
Q92609:522	0.599749	0.0689041	1.11669
Q92614:1970	-0.264551	-0.194289	-0.538198
Q92614:2041	-0.0865688	0.00982559	0.403596
Q92625:647	0.030933	0.109137	-0.25004
Q92685:11	0.116051	0.149313	0.718257
Q92769:394	-0.0274067	0.343486	0.32675
Q92769:422	0.0314381	0.224975	1.06256
Q92785:142	0.0628839	-0.00370335	0.469698
Q92835:243	-0.422723	0.116725	0.369714
Q92835:971	-0.143344	0.123595	-0.0633502
Q92878:635	-0.0329273	-0.103742	0.665512
Q92922:328	0.23411	0.337626	0.588518
Q92934:118	0.323424	-0.135814	0.343136
Q92934:134	0.294152	0.140647	0.488756
Q92945:480	0.179913	-0.143277	0.43819
Q93009:18	-0.119886	-0.0593297	0.388008
Q93074:635	-0.227681	-0.277152	0.495664
Q969E4:65	0.296898	0.0610192	0.436441
Q96AC1:159	-0.524314	-0.0652367	-1.32157
Q96CV9:342	0.0703143	-0.0353887	-0.338302
Q96CX2:171	-0.498572	0.50142	-0.729366
Q96CX2:176	-0.515143	-0.200743	-0.756328
Q96CX2:196	-0.0564646	-0.0310584	-1.08896
Q96CX2:200	-0.103112	-0.00232561	-1.05648
Q96D71:709	0.123727	-0.0273346	0.22143
Q96D96:60	-0.432352	-0.264136	-0.294728
Q96DR7:392	-0.525822	-0.0668317	-1.38408
Q96E39:88	0.355523	-0.0658307	0.0410739
Q96EI5:102	0.0091338	0.123502	0.0908907
Q96EP0:466	-0.0193602	0.115644	-0.0929238
Q96EV2:205	0.22953	0.0225469	0.734435
Q96EV2:765	0.0974019	0.255961	0.629683
Q96FF7:91	0.22924	-0.10858	-0.361364
Q96G03:165	-0.0713709	-0.282369	-0.201524
Q96I25:155	0.260789	0.0670955	0.133972
Q96JC9:165	0.112637	-0.124897	0.531177
Q96JG6:559	-0.0798029	0.0726068	0.0688851
Q96JM3:204	0.148304	0.17627	0.344464
Q96JM3:386	0.466472	-0.073935	0.242329
Q96JM3:603	-0.127454	-0.193381	-0.232249
Q96K21:354	0.090967	0.384701	0.51831
Q96KC8:430	0.113789	0.192729	0.488609
Q96KR1:1054	0.0766335	0.271933	0.450318
Q96LD4:588	-0.220703	-0.0339671	-0.342193
Q96MM6:25	-0.77848	-0.588488	-1.70821
Q96MM6:42	-0.496713	-0.55243	-2.71436
Q96N64:81	0.340584	0.0397919	0.370664
Q96NB3:351	-0.0422403	0.0414171	-0.0382478
Q96PE1:1107	-0.181511	-0.100833	-0.478162
Q96PE2:1002	-0.00806047	0.158665	-0.545353
Q96PE2:527	-0.11951	0.00410259	-0.643271
Q96PK6:206	0.14551	0.123789	-0.115028
Q96PK6:618	0.130266	0.002492	-1.15659
Q96PU4:667	-0.190042	-0.371951	-1.32117
Q96Q42:483	-0.0434082	-0.509548	0.153535
Q96Q42:492	-0.0434082	-0.424348	-0.106823
Q96QH2:358	0.0524002	-0.204666	-0.656778
Q96RL1:653	-0.0461581	-0.0433518	0.0856231
Q96RL1:677	-0.0250496	0.212869	0.169878
Q96RR4:495	-0.198893	-0.14774	-0.677769
Q99442:375	0.020069	-0.00772948	0.731502
Q99549:51	-0.110674	0.118191	0.282725
Q99584:32	-0.0929457	-0.21901	-0.658869
Q99683:1033	-0.269454	-0.0145646	-0.074775
Q99698:2105	0.0911352	0.0292263	-0.137148
Q99719:225	-0.180049	-0.0290158	-0.0355697
Q99733:125	-0.0264258	1.4573	0.263343
Q99759:340	-0.119134	-0.132833	-0.643133
Q9BQA1:5	-0.0580208	0.0592504	0.417651
Q9BQG0:11	-0.105012	0.00661743	0.70279
Q9BRD0:248	0.209149	-0.0405857	0.648222
Q9BRD0:325	-0.0870842	0.00395982	0.510207
Q9BRJ6:175	0.262905	0.114745	0.521778
Q9BRZ2:475	-0.180325	-0.111704	0.824453
Q9BUQ8:14	0.338033	0.225225	0.0308528
Q9BVG4:181	0.121288	0.12678	0.496272
Q9BVG4:197	0.190065	0.854285	-0.247548
Q9BW04:185	-0.0586538	-0.181852	-0.479651
Q9BW04:456	0.107964	0.264814	-0.569563
Q9BW71:196	0.103018	0.0966036	0.772468
Q9BW71:227	0.00378191	-0.125092	0.312533
Q9BWH2:151	-0.361769	-0.402984	-0.960607
Q9BXK5:426	-0.131006	-0.0705948	0.37671
Q9BXM0:1082	-0.731451	-0.144861	-3.61998
Q9BXM0:1401	-0.672434	-1.29276	-3.62544
Q9BXP5:136	0.183561	-0.0172454	0.27447
Q9BZI1:186	0.518533	0.134828	-0.504364
Q9BZL4:509	-0.148918	-0.0715367	-1.07114
Q9BZQ8:646	-0.280539	-0.173781	-0.34076
Q9BZZ5:464	0.495052	0.525653	0.0669092
Q9C0B5:380	0.253188	0.0585049	0.549406
Q9C0C2:1297	0.0628315	0.00862149	-0.171108
Q9C0C2:131	0.0098601	-0.070071	-0.180095
Q9C0C2:1545	0.406421	-0.090273	-1.20709
Q9C0C2:1666	-0.102012	-0.0125199	-0.470987
Q9C0C2:178	0.100376	0.0500216	-0.237281
Q9C0C2:221	0.043773	-0.0350882	-0.585654
Q9C0C2:228	-0.102312	-0.0264572	-0.511188
Q9C0C2:429	-0.255564	-0.118508	-0.665305
Q9C0C2:435	-0.0564354	-0.125849	-0.0118999
Q9C0C2:601	0.093699	0.362593	-0.112934
Q9C0C2:672	-0.0241995	0.51736	-0.119337
Q9C0C2:691	-0.390202	0.00532022	-0.315917
Q9C0C2:836	-0.0242692	0.122966	-0.417183
Q9C0C2:851	-0.121123	0.0543208	-0.627137
Q9C0C2:872	0.108863	0.0448934	-0.496255
Q9C0C2:893	0.0358752	-0.0476494	-0.740786
Q9GZR7:82	0.20533	0.246056	0.550195
Q9H019:103	0.0232837	-0.0438352	-0.243173
Q9H1B7:547	0.0925583	0.359354	0.609836
Q9H1E3:113	0.251974	-0.129008	0.369574
Q9H1E3:144	0.26693	0.0552972	1.23163
Q9H1E3:19	0.148791	-0.0126004	-0.217963
Q9H1E3:214	0.404384	1.67353	0.151605
Q9H1E3:223	0.501748	0.501741	0.535773
Q9H1E3:58	0.17858	0.321746	0.311021
Q9H1E3:61	0.135085	0.0590041	0.239345
Q9H1E3:75	0.482195	0.639149	0.137673
Q9H1E3:79	0.538273	1.01585	-0.0472389
Q9H307:100	0.379285	0.604863	0.583571
Q9H307:381	-0.0258936	-0.153041	0.570212
Q9H307:66	0.398751	0.293993	0.920355
Q9H307:690	0.407077	-0.0287665	0.548114
Q9H3N1:247	0.0570245	0.494973	0.161819
Q9H3N1:270	0.177843	0.0843211	0.439881
Q9H3P7:20	0.023836	-0.196596	0.632497
Q9H3P7:43	0.0209408	0.497561	0.607742
Q9H425:289	-0.278795	-0.410758	-1.29109
Q9H6F5:58	0.0956453	0.16982	0.661485
Q9H6F5:91	0.228598	0.509237	0.642123
Q9H6X2:362	-0.286051	0.0169834	0.28224
Q9H6Z4:108	0.0963157	-0.204952	0.250149
Q9H6Z4:333	-0.0533576	0.0957926	0.0448051
Q9H7M9:235	-0.231579	-0.249373	-0.586713
Q9H7N4:498	-0.0610226	0.297035	0.582583
Q9H7N4:719	0.040146	-0.583486	0.591259
Q9H7N4:734	-0.235812	0.0521186	0.346077
Q9H7N4:989	-0.181461	-0.0662999	0.717049
Q9HAN9:117	0.197307	0.093624	0.0842846
Q9HAU0:933	-0.0780439	-0.205681	0.339962
Q9HB58:256	-0.154562	0.119328	0.0794222
Q9HCE9:669	-0.0532044	-0.429823	0.0490132
Q9HCG8:829	0.0749317	-0.0359237	0.972012
Q9HCM4:436	-0.374022	-0.169475	-1.02517
Q9NPG3:493	0.0434545	-0.102184	0.351073
Q9NQX3:194	-0.109295	0.0243089	-0.114135
Q9NR09:480	0.0857816	0.202861	0.598679
Q9NR30:121	0.109201	0.333593	1.52448
Q9NRF2:96	-0.065484	-0.00597008	-0.453617
Q9NUL3:492	0.14123	0.00876369	0.574062
Q9NV29:121	-0.203115	-0.531515	-1.99773
Q9NW97:115	0.0159359	0.255264	0.504615
Q9NWH9:553	0.156715	0.276238	0.518242
Q9NWV8:29	-0.0041448	0.0560242	-0.105324
Q9NWW5:31	0.460417	0.358572	0.176096
Q9NX46:64	0.00415482	-0.251385	0.0743257
Q9NX58:276	-0.110991	-0.0812685	-0.237018
Q9NZN4:438	-0.811237	-0.690787	-2.16752
Q9NZN4:468	-0.757085	-0.240933	-2.71818
Q9NZU5:16	-0.25163	-0.0171927	-1.03582
Q9P035:114	0.184913	0.210407	0.273839
Q9P0V9:28	0.0656358	-0.168497	-0.834697
Q9P270:48	-0.0325225	-0.230655	0.132205
Q9P2B4:549	0.0877894	1.06935	0.063297
Q9P2G1:737	0.0442777	0.0823572	0.0629327
Q9P2R6:656	0.168244	0.0906724	0.0690781
Q9UBB9:210	-0.209187	0.111138	0.0311667
Q9UBB9:59	-0.0121451	-0.0724231	0.309577
Q9UBB9:98	0.116818	0.0261193	0.459594
Q9UBC2:229	-0.384699	-0.0608374	-0.376849
Q9UBM7:14	0.439086	0.033564	-0.372775
Q9UER7:495	0.0849338	-0.0792082	0.54649
Q9UEW8:385	0.406205	-0.152539	1.1687
Q9UGU0:574	0.228619	-0.0141025	1.09648
Q9UHB6:132	-0.124028	-0.0375699	0.298321
Q9UHD8:30	-0.000907259	0.00750601	0.118991
Q9UI08:331	-0.0532581	0.119402	-0.440087
Q9UI08:369	-0.160938	0.0640738	-0.163653
Q9UIG0:1468	0.0945299	0.238971	0.275515
Q9UIK4:299	-0.0557609	-0.0814803	-1.01823
Q9UIK4:349	-0.471575	-0.06905	-0.879612
Q9UJU6:291	0.27222	0.204124	0.161253
Q9UK59:514	0.0756634	-0.509899	0.144534
Q9UK61:1103	-0.137522	-0.203491	0.0590176
Q9UK76:88	0.11054	0.0846765	0.782591
Q9UKK3:101	-0.110494	0.159023	0.529147
Q9UKK3:1186	-0.270739	-0.0088243	0.369502
Q9UKK3:1504	-0.0412464	0.0590759	-0.197619
Q9UKM9:135	0.0144875	0.804525	0.0549562
Q9UKN8:611	-0.210079	0.0307406	0.475643
Q9UKV3:1004	-0.0223241	0.126856	-0.250348
Q9UKV3:216	0.0473012	0.751759	0.347868
Q9UKV3:410	-0.0932487	0.0257494	0.200061
Q9UKV3:490	0.079594	0.172951	0.317386
Q9UKV3:710	0.200562	0.228864	0.471626
Q9UKV3:729	0.172438	0.109738	0.460548
Q9UKV3:838	-0.0380265	0.0407661	0.176469
Q9UKV3:898	0.167735	0.199382	0.460253
Q9ULL5:1561	0.105341	-0.0107691	0.652279
Q9ULL5:651	-0.0938632	0.10185	-0.133021
Q9ULL8:299	-0.31279	0.0343912	-1.32447
Q9ULU4:668	0.0835883	0.0354407	0.469274
Q9UMX1:346	-0.149165	0.119786	-0.198329
Q9UNE7:19	0.197519	0.223672	1.15654
Q9UNL2:105	0.400967	0.509849	1.03519
Q9UPN9:1102	-0.16094	0.135311	0.419349
Q9UPP1:857	-0.223165	-0.185836	0.197038
Q9UPQ0:169	-0.389922	-0.204743	-1.19043
Q9UPQ0:303	-0.437226	-0.27173	-1.65603
Q9UPQ0:377	-0.114419	-0.387672	-1.69607
Q9UPQ0:493	0.0142563	-0.138528	-1.3693
Q9UPQ0:718	-0.494214	-0.743165	-1.72257
Q9UPQ0:875	-0.384025	0.00923021	-1.70891
Q9UPQ0:907	-0.423144	-0.177972	-2.97093
Q9UPU5:1943	0.0959295	0.27973	0.834895
Q9UPU5:2047	-0.00337456	0.469238	0.40967
Q9UQ35:1003	0.209951	0.945685	0.681843
Q9UQ35:1012	0.0863103	-0.151575	0.813524
Q9UQ35:1014	0.377122	0.367142	0.931341
Q9UQ35:1083	0.168418	0.119907	0.540559
Q9UQ35:1179	-0.0831979	0.0458674	-0.0868296
Q9UQ35:2272	-0.0353799	-0.352354	-0.0243242
Q9UQ35:2581	0.068291	0.599329	0.313776
Q9UQ35:2702	0.474305	0.54636	0.519407
Q9UQ35:778	0.150841	0.168334	0.373005
Q9UQE7:1067	0.114077	-0.0559505	0.0318675
